# Supplementary material for: Untargeted Lipidomics after D2O Administration Reveals the Turnover Rate of Individual Lipids in Various Organs of Living Organisms
Source: MDPI journal article supplement (doi:10.3390/ijms241411725), 2023-07-21

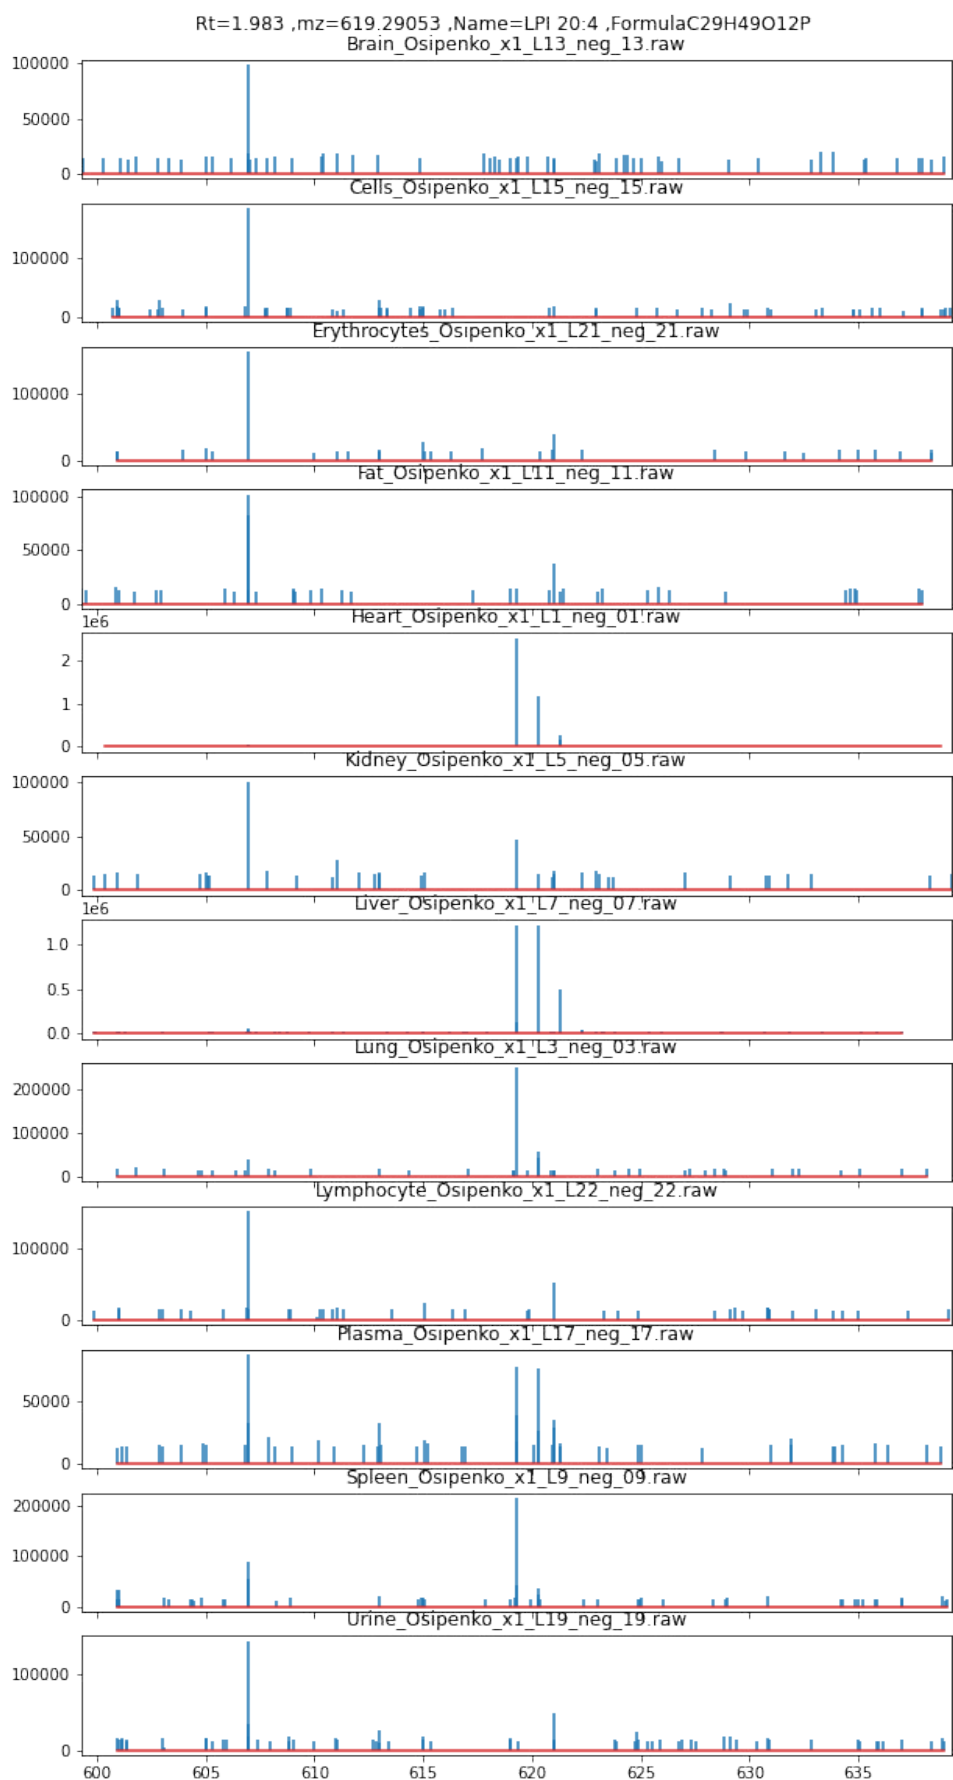

Rt=2.1 ,mz=247.17015 ,Name=FA 16:4 ,FormulaC16H24O2  
Brain\_Osipenko\_x1\_L13\_neg\_13.raw

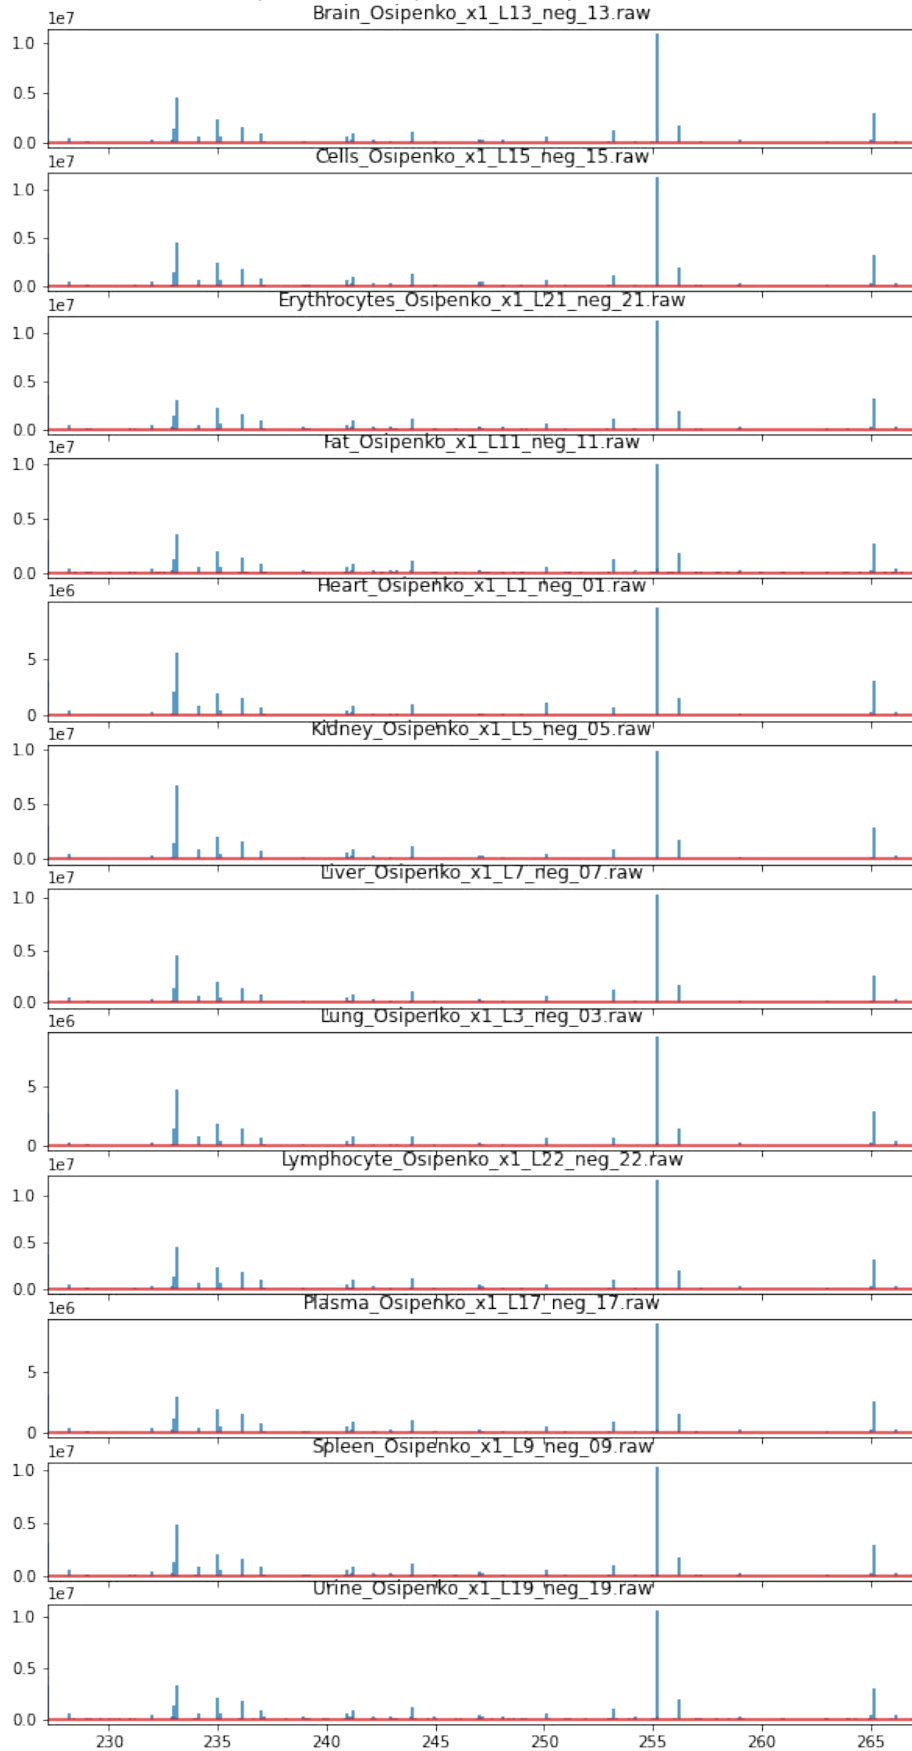

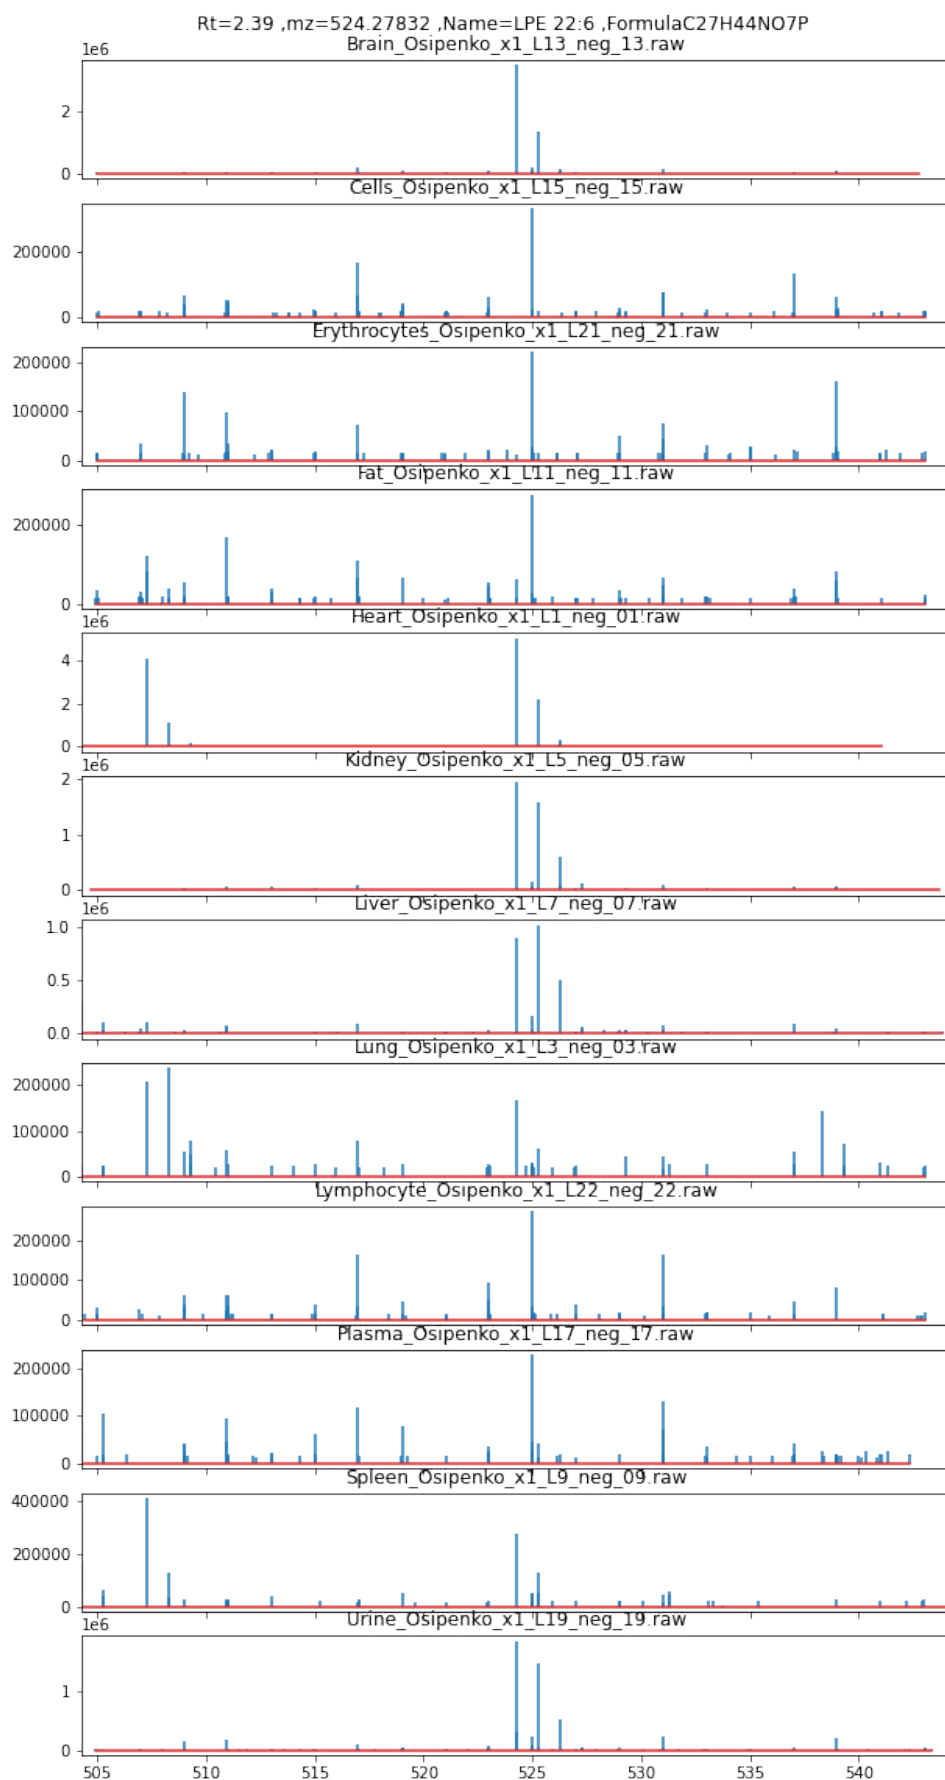

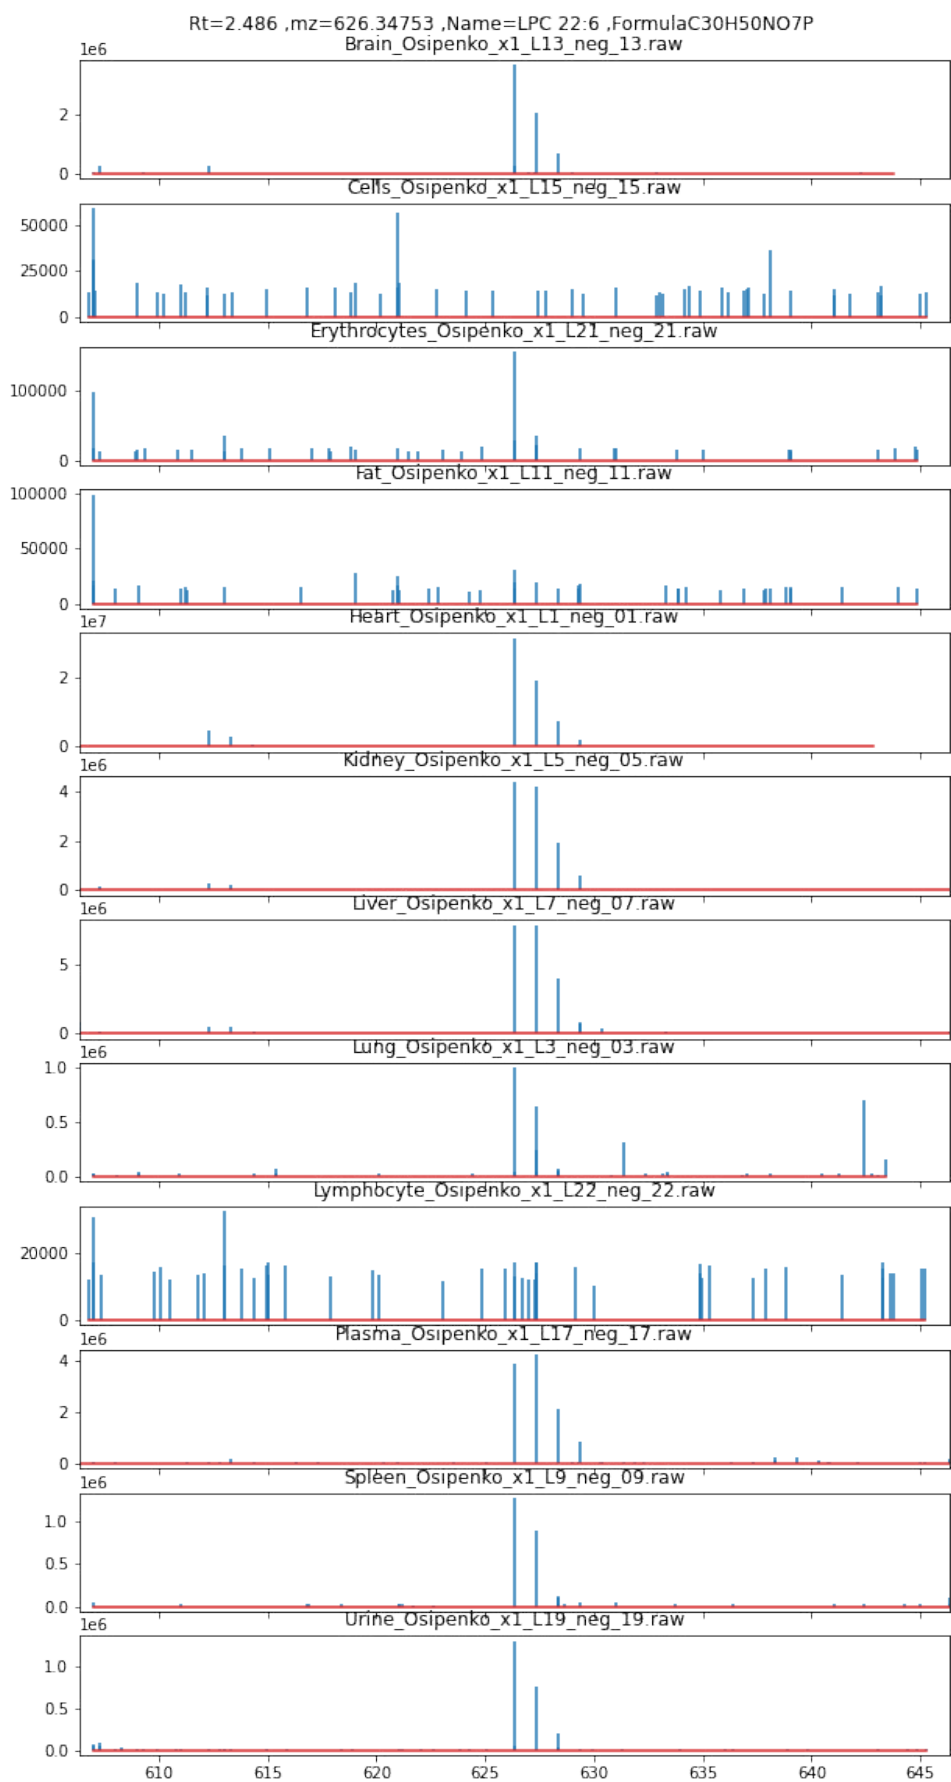



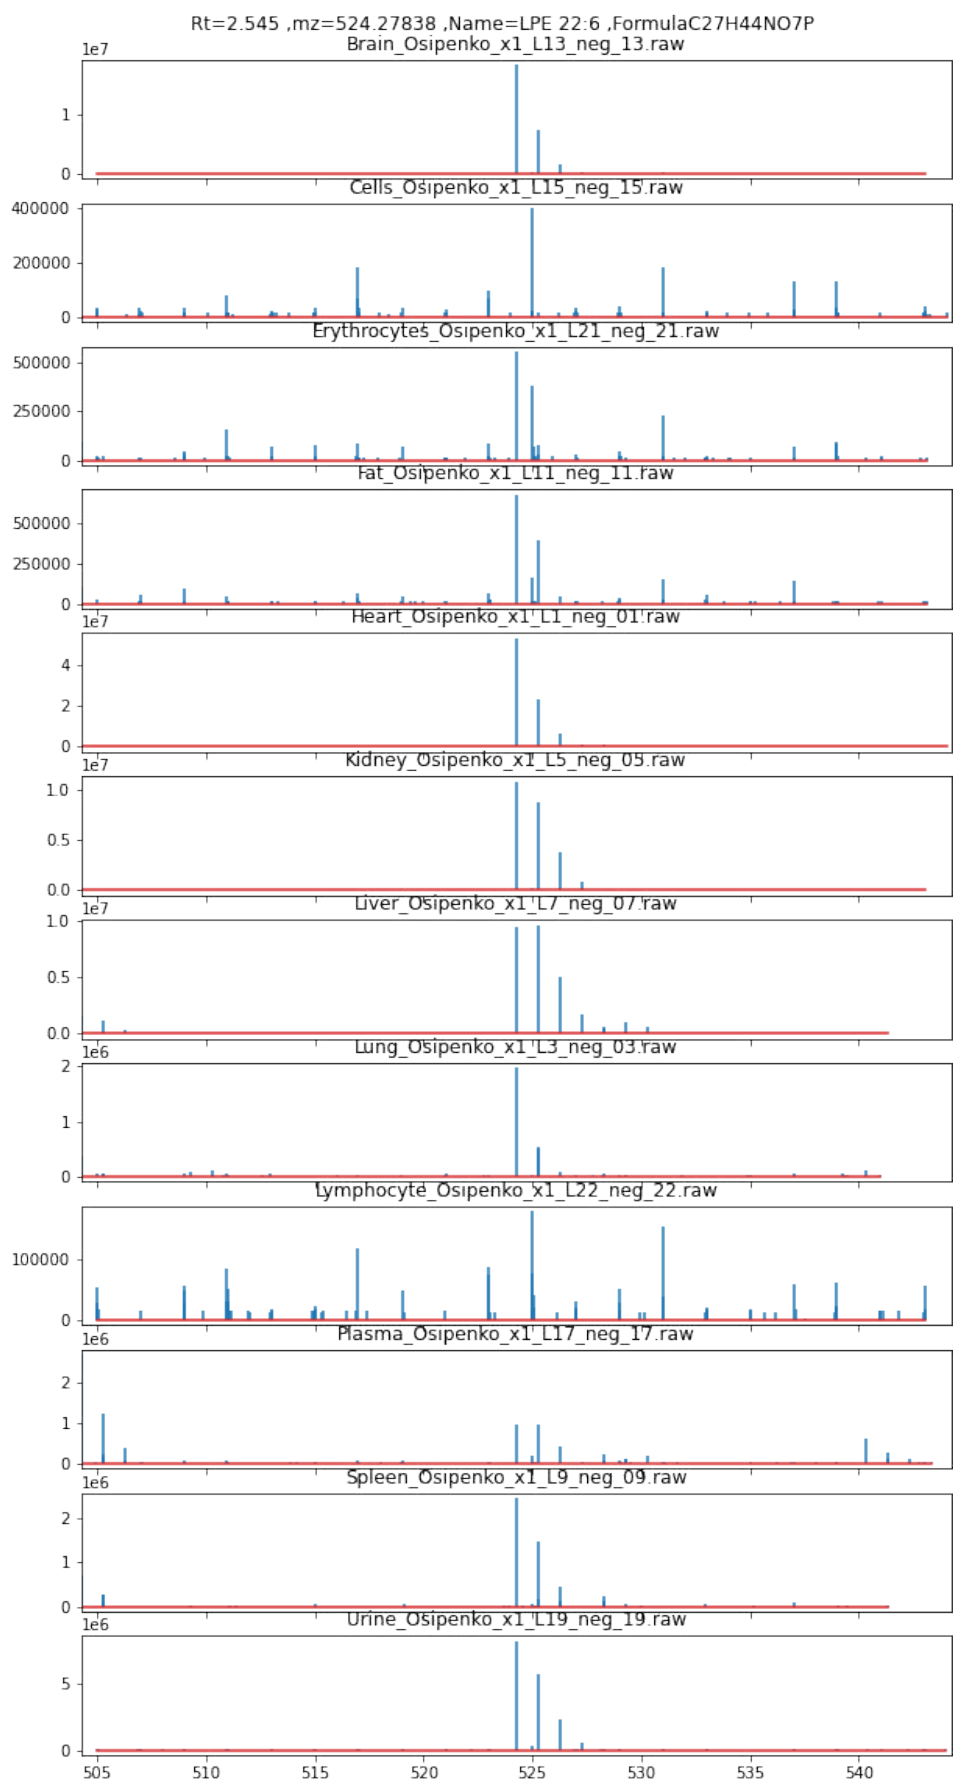

Rt=2.583 ,mz=476.27954 ,Name=LPE 18:2 ,FormulaC23H44NO7P  
Brain\_Osipenko\_x1\_L13\_neg\_13.raw

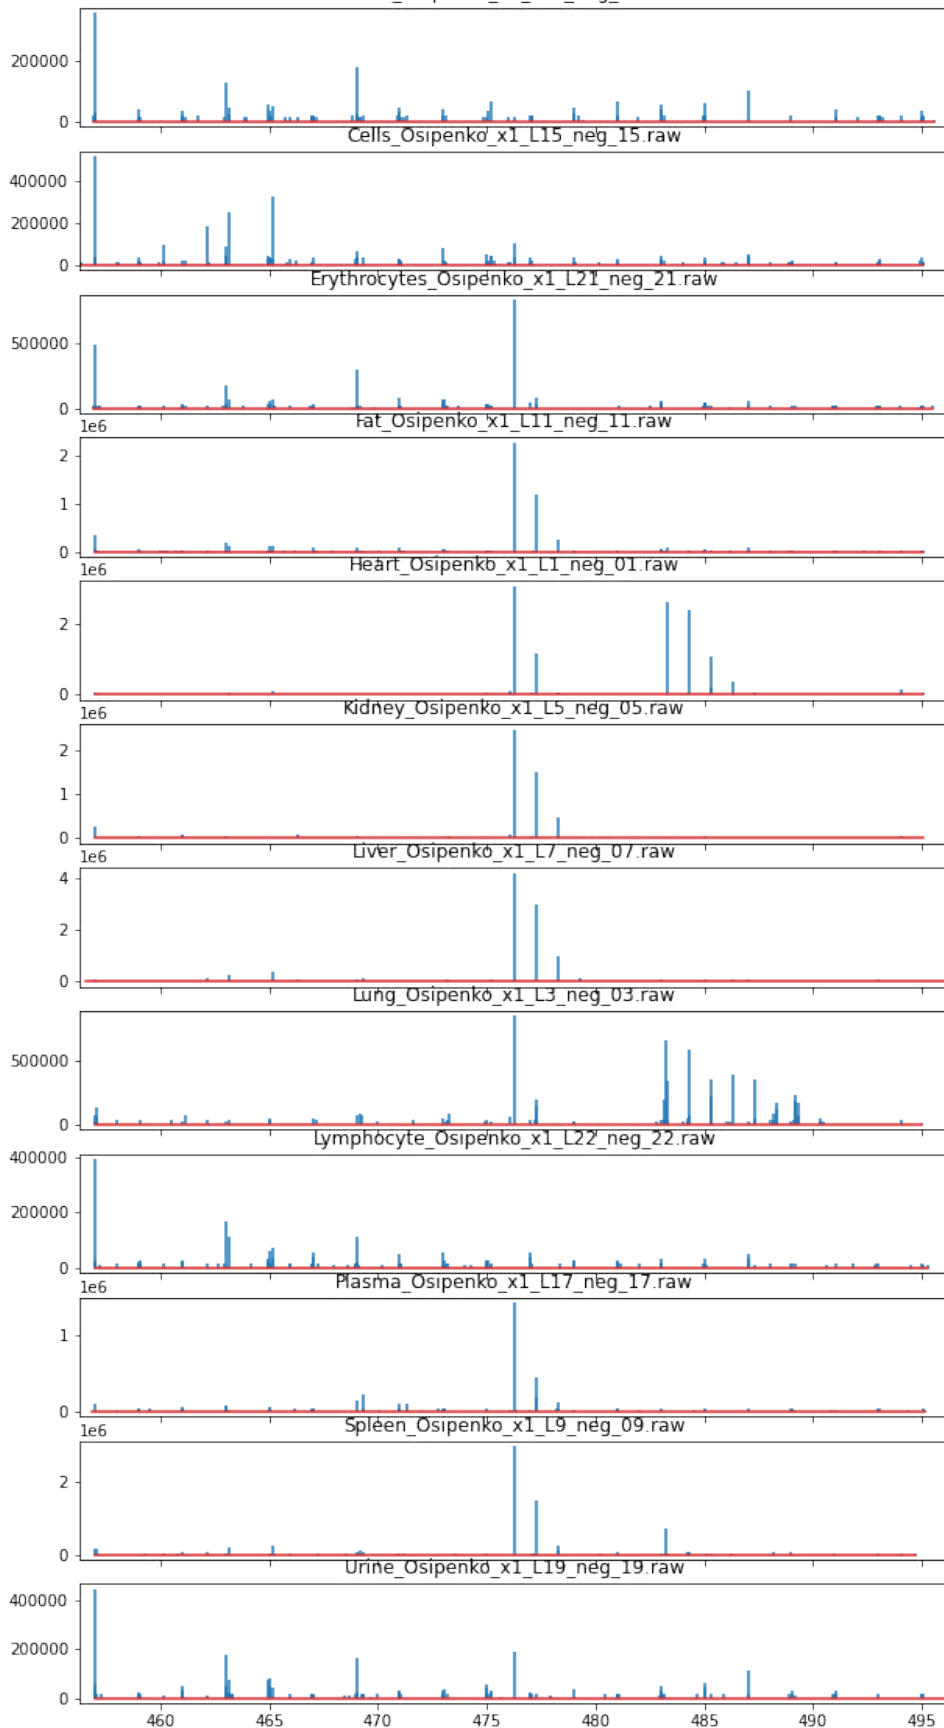

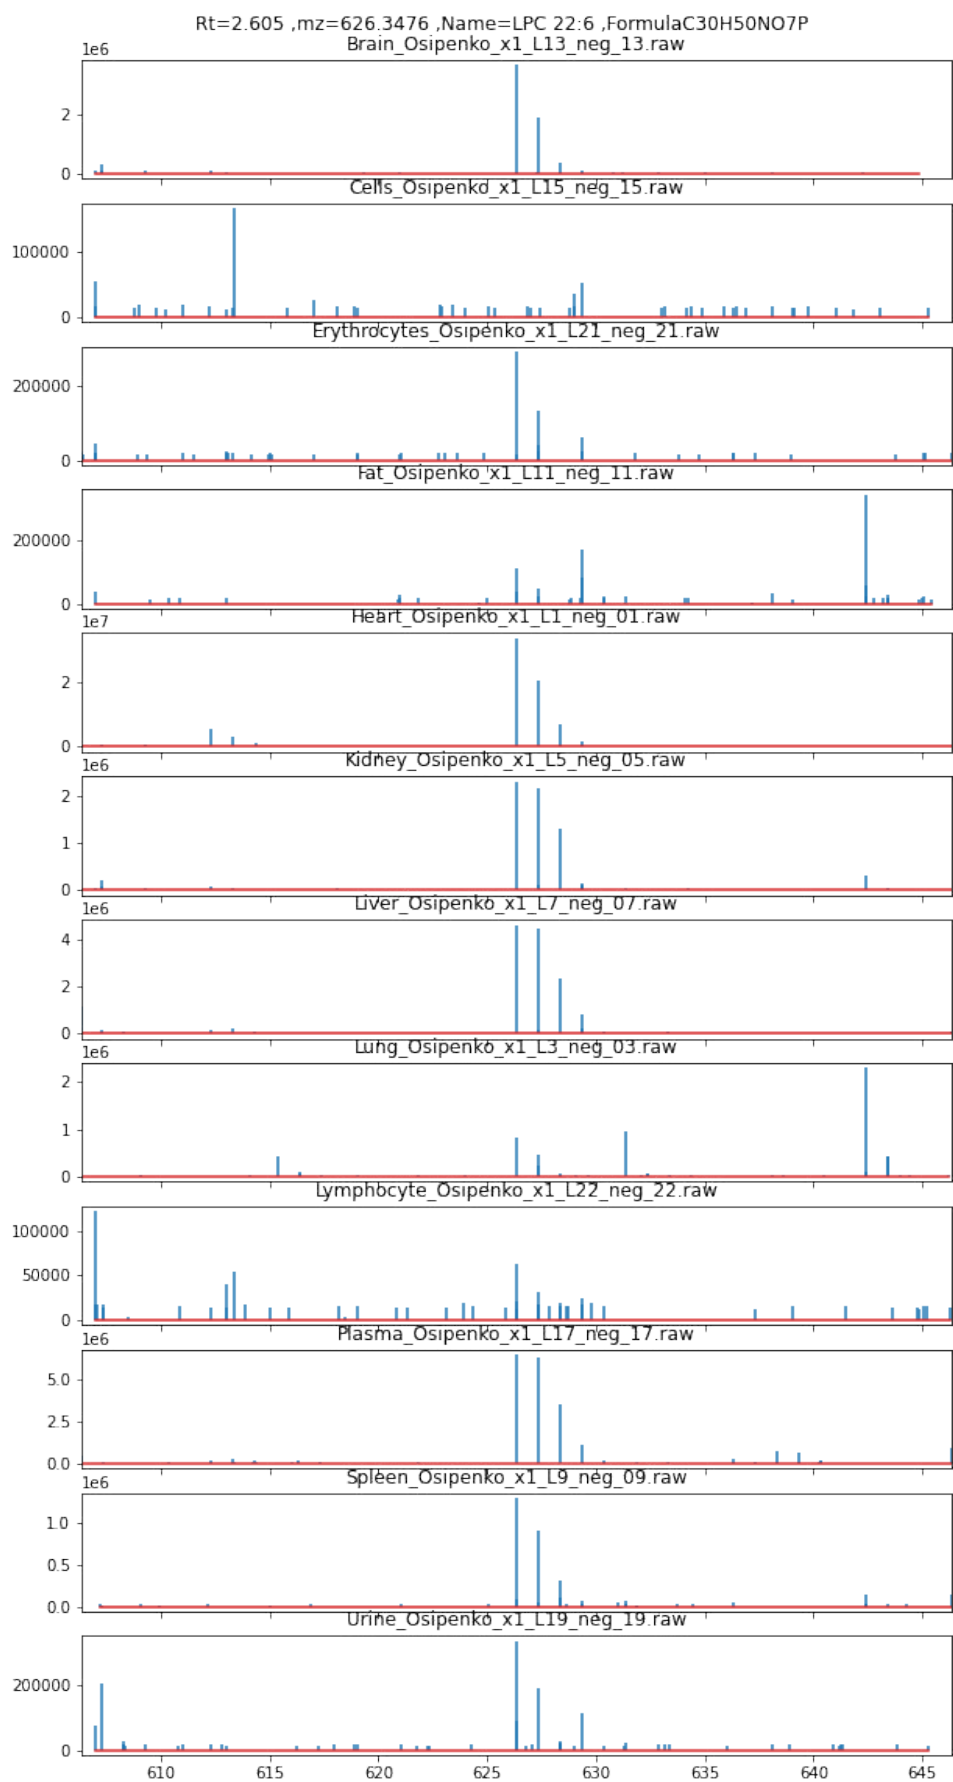

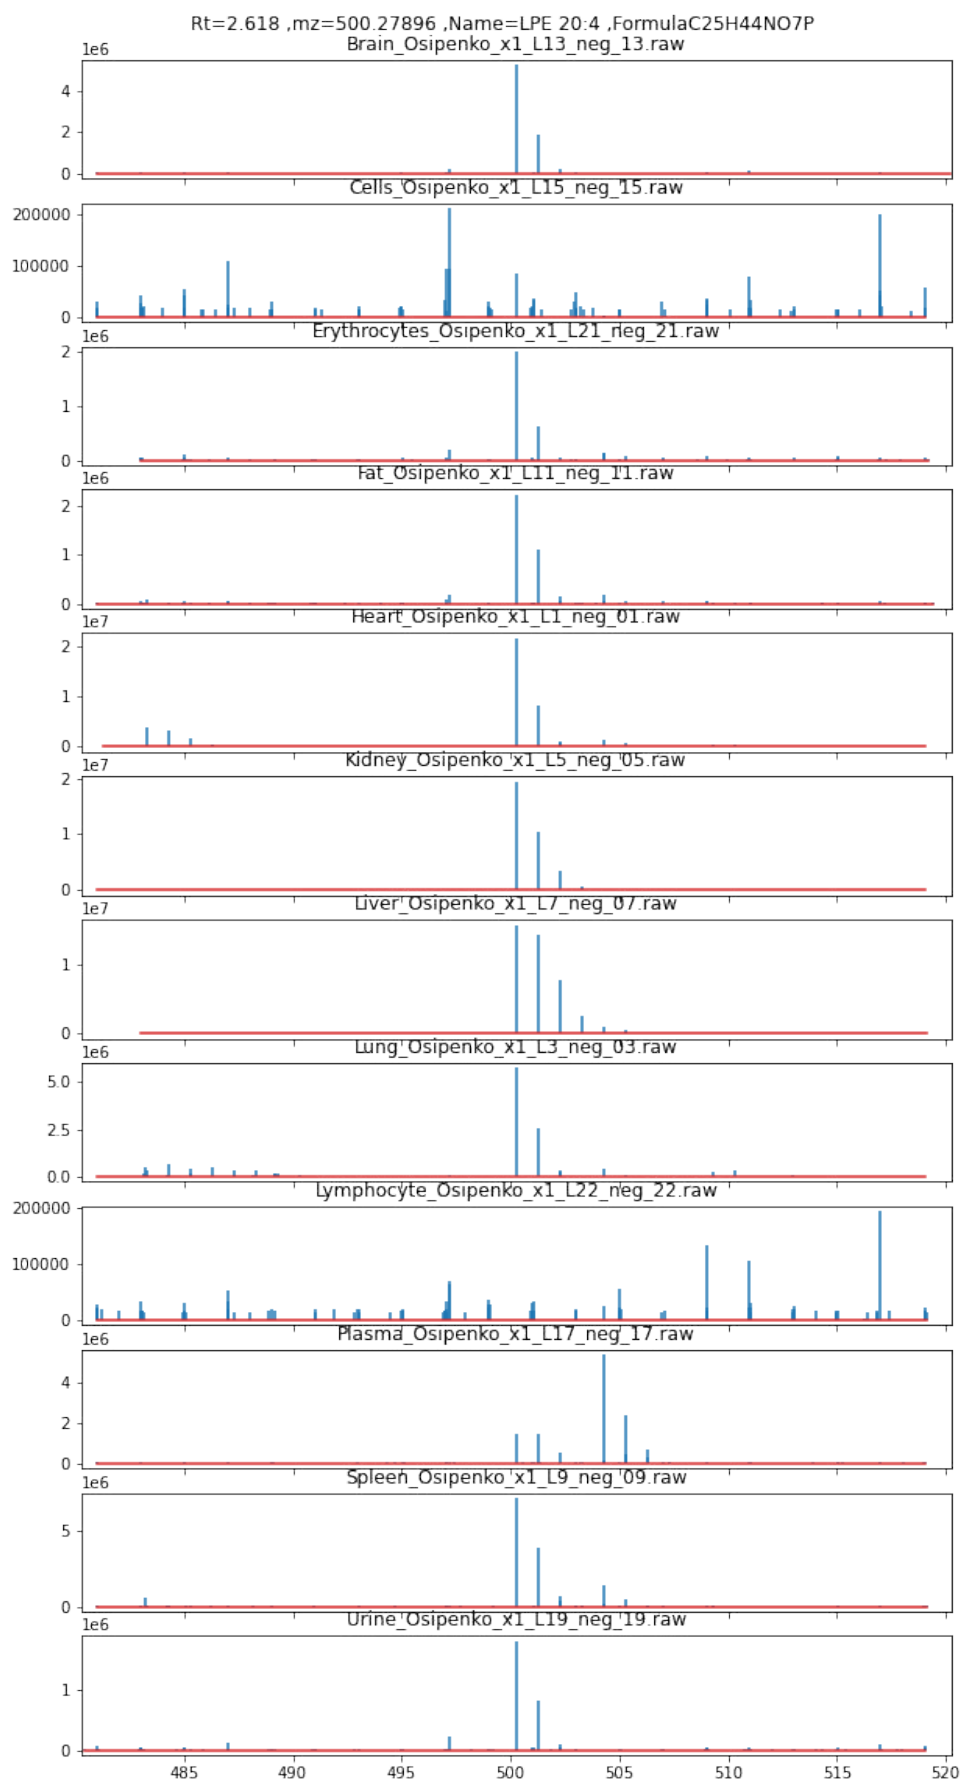

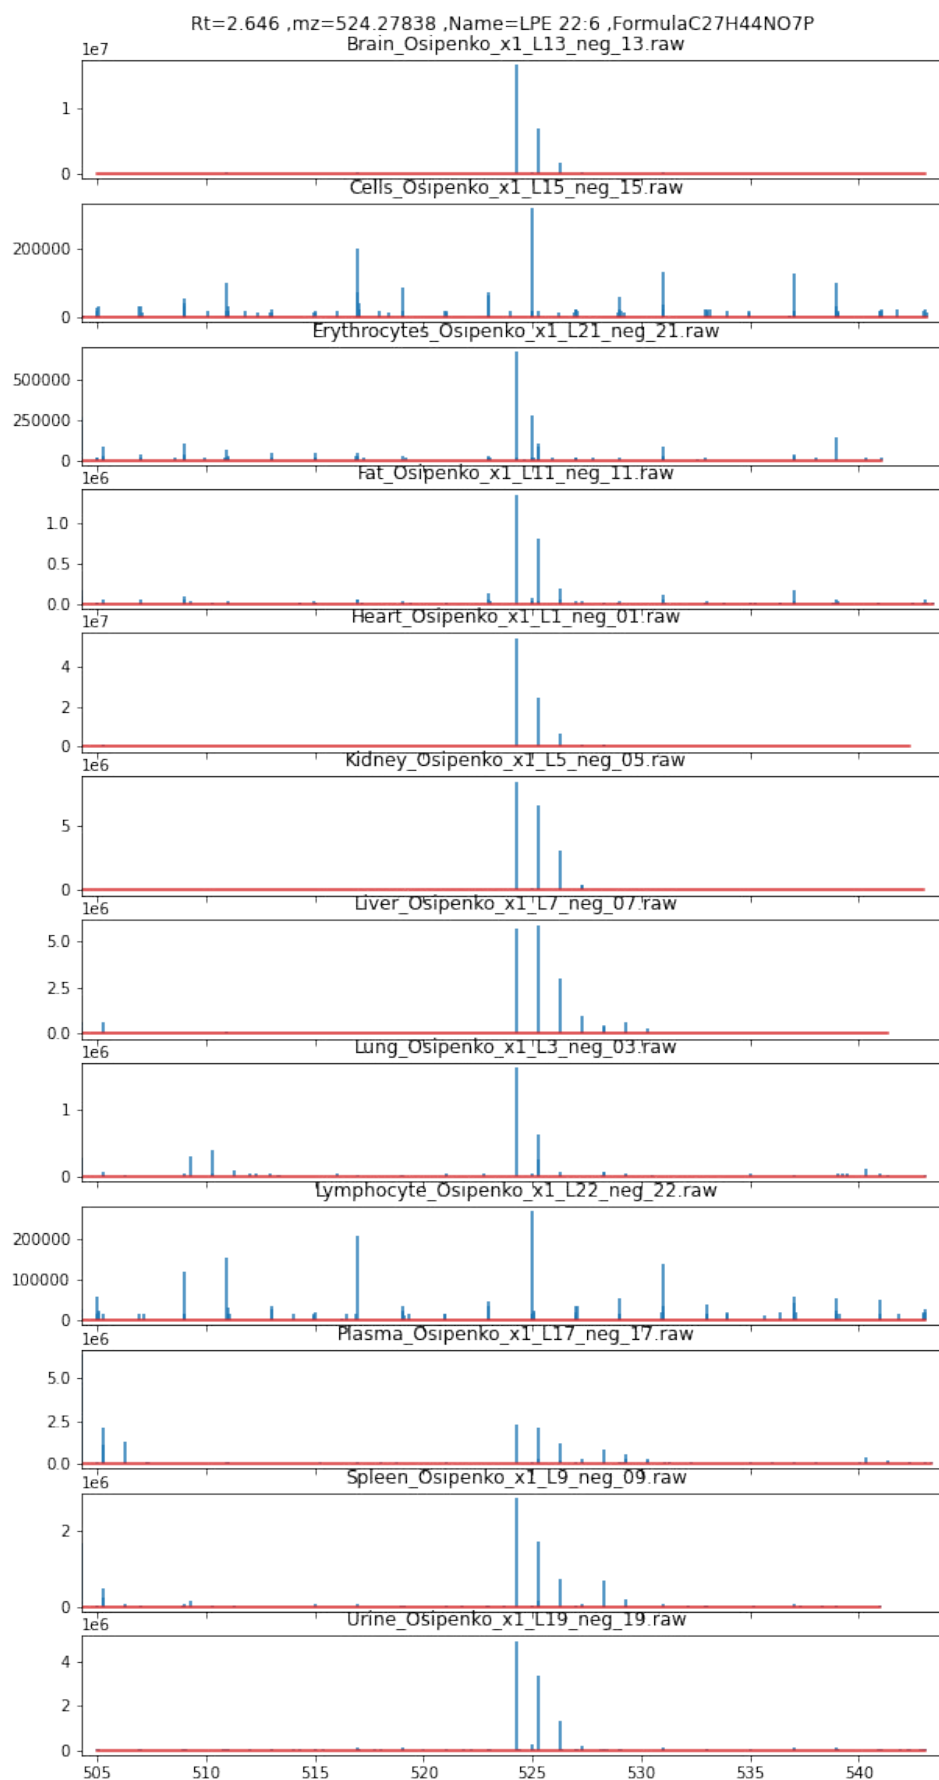

Rt=2.677 ,mz=602.34778 ,Name=LPC 20:4 ,FormulaC28H50NO7P  
Brain\_Osipenko\_x1\_L13\_neg\_13.raw

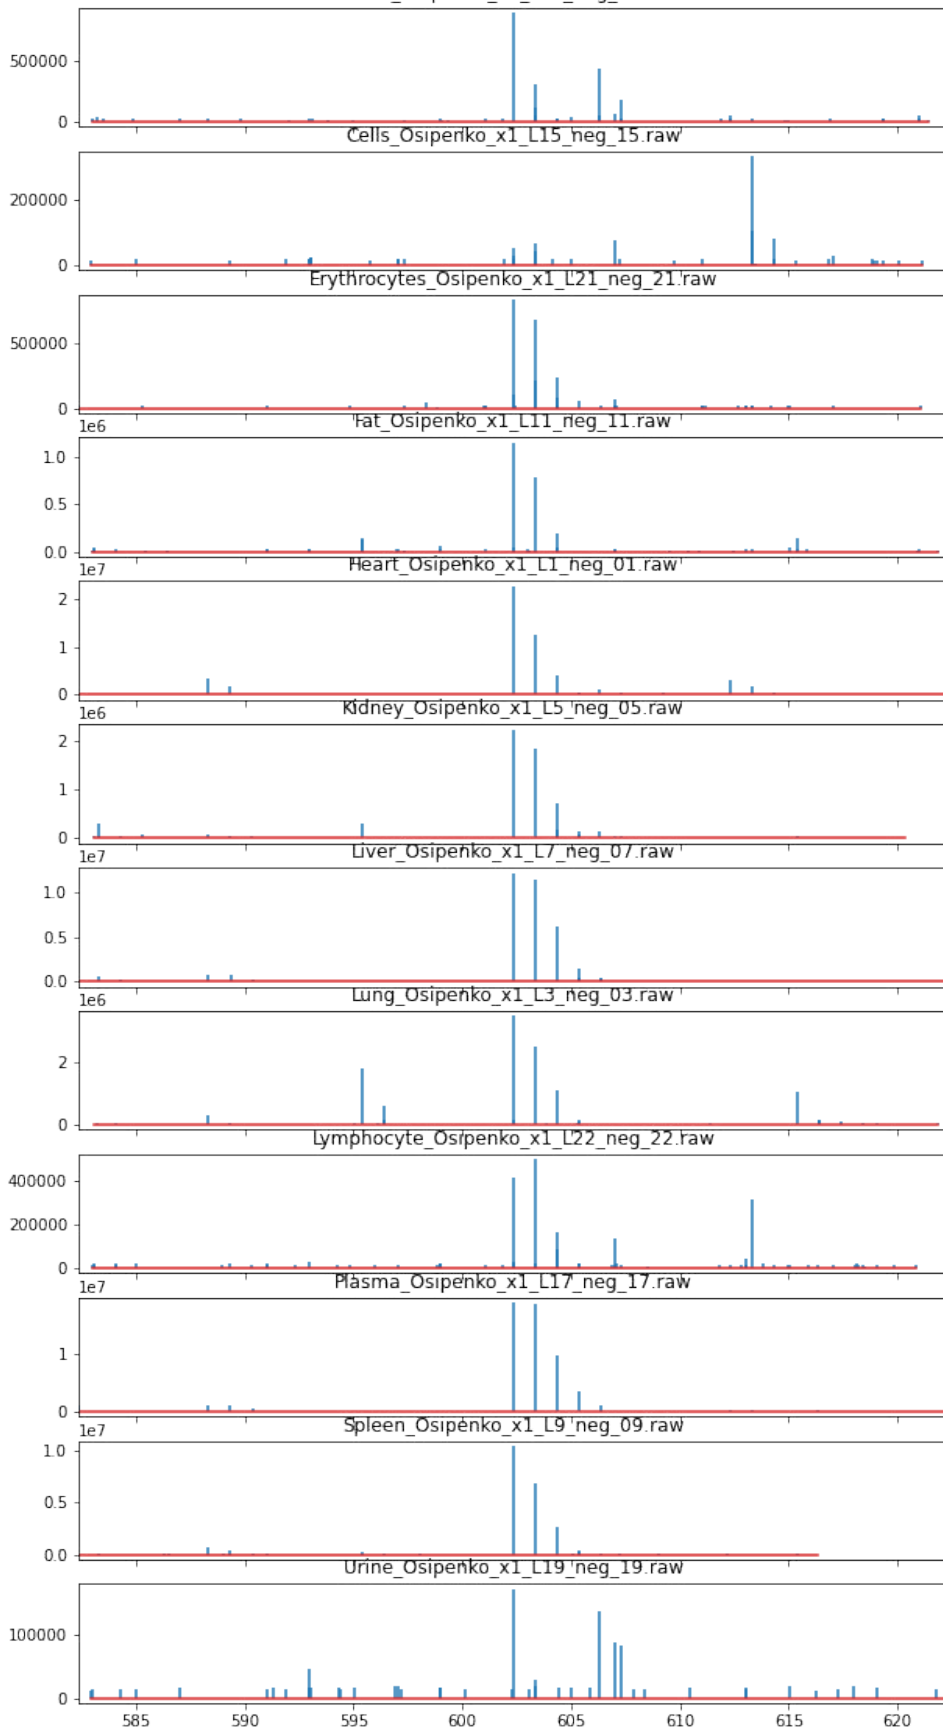

Rt=2.717 ,mz=476.27911 ,Name=LPE 18:2 ,FormulaC23H44NO7P  
Brain\_Osipenko\_x1\_L13\_neg\_13.raw

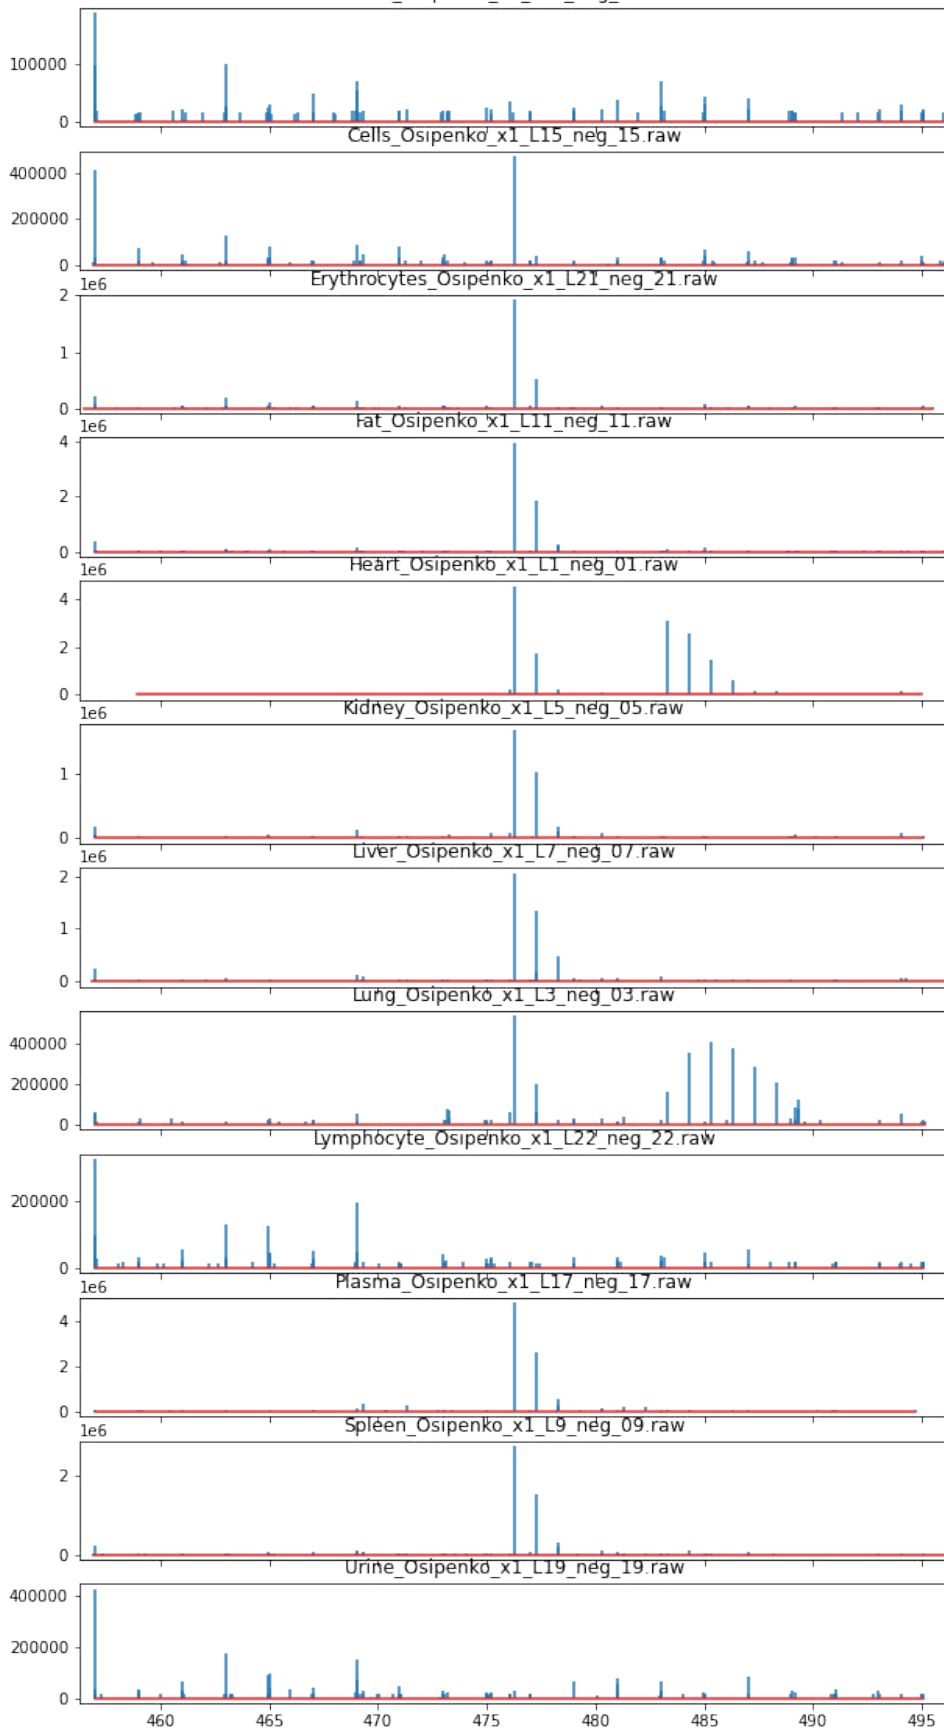

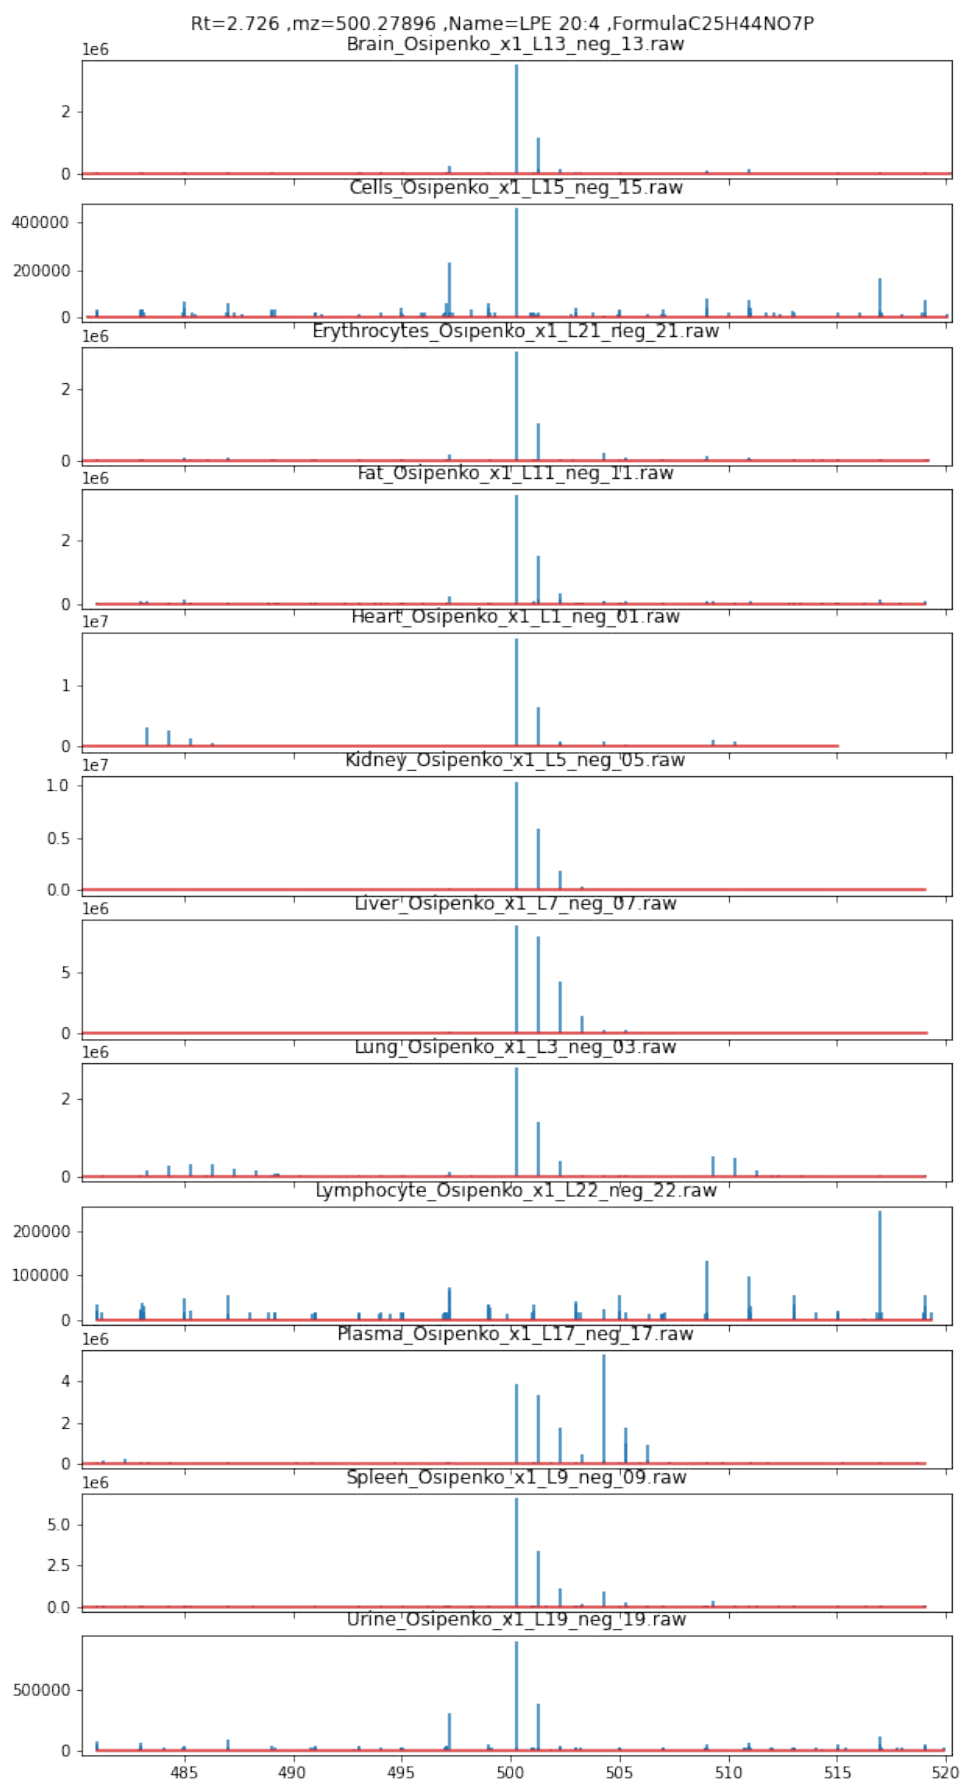



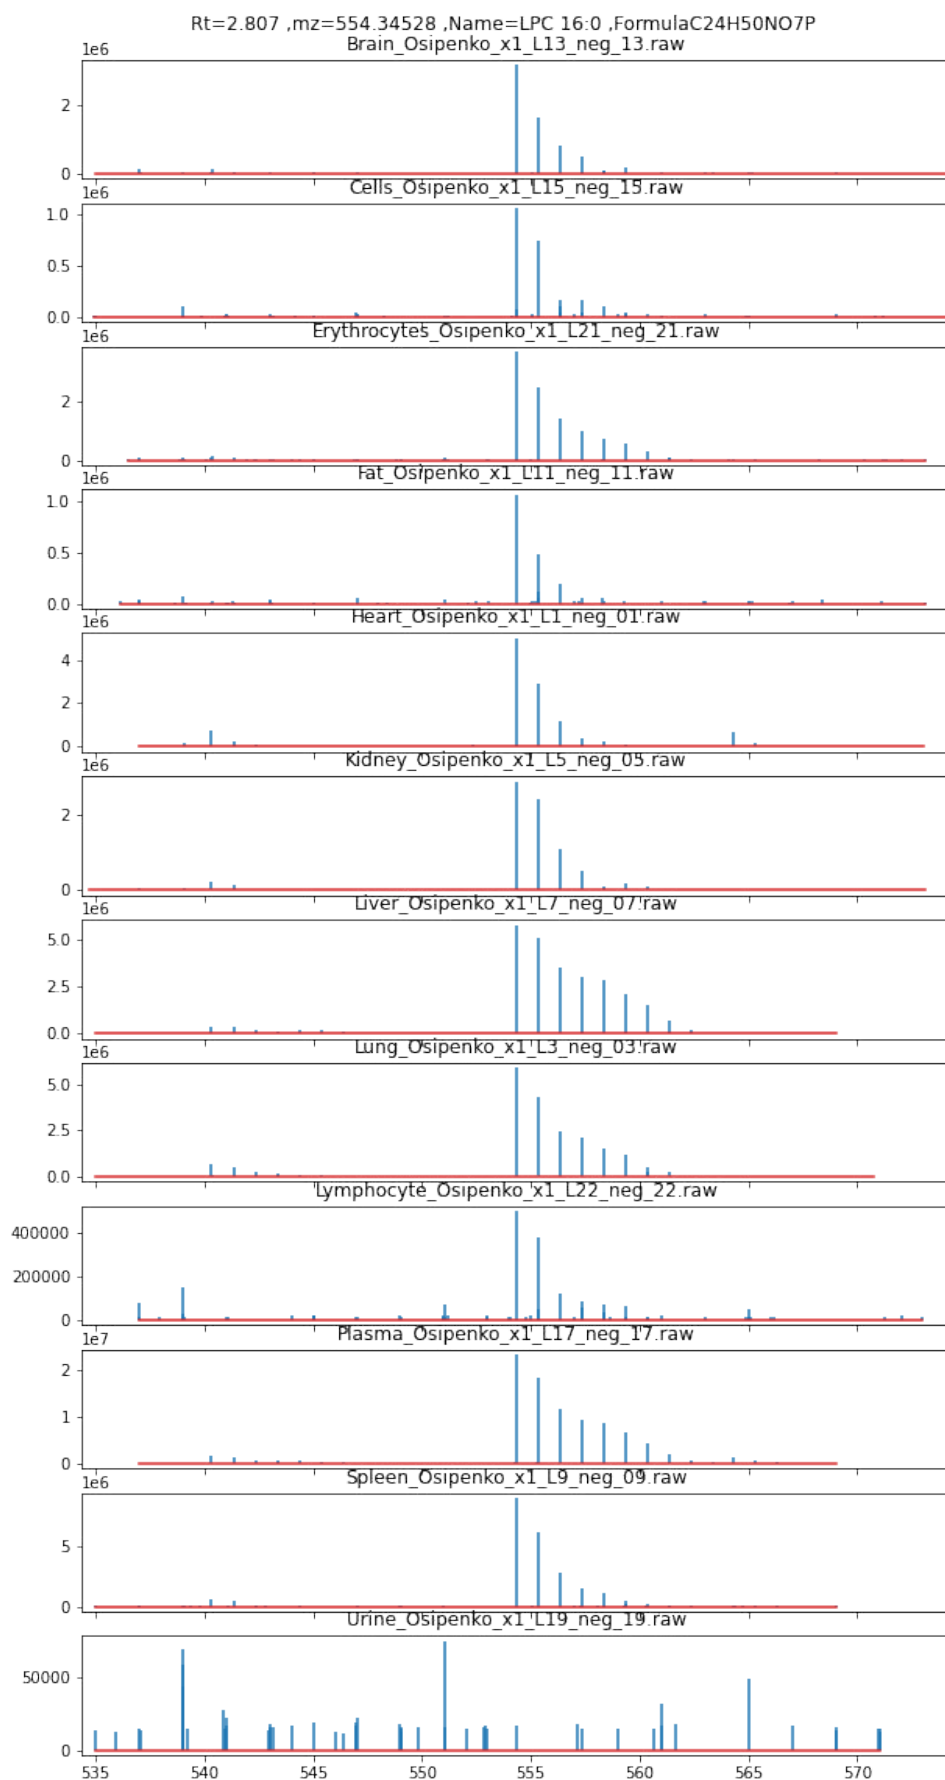

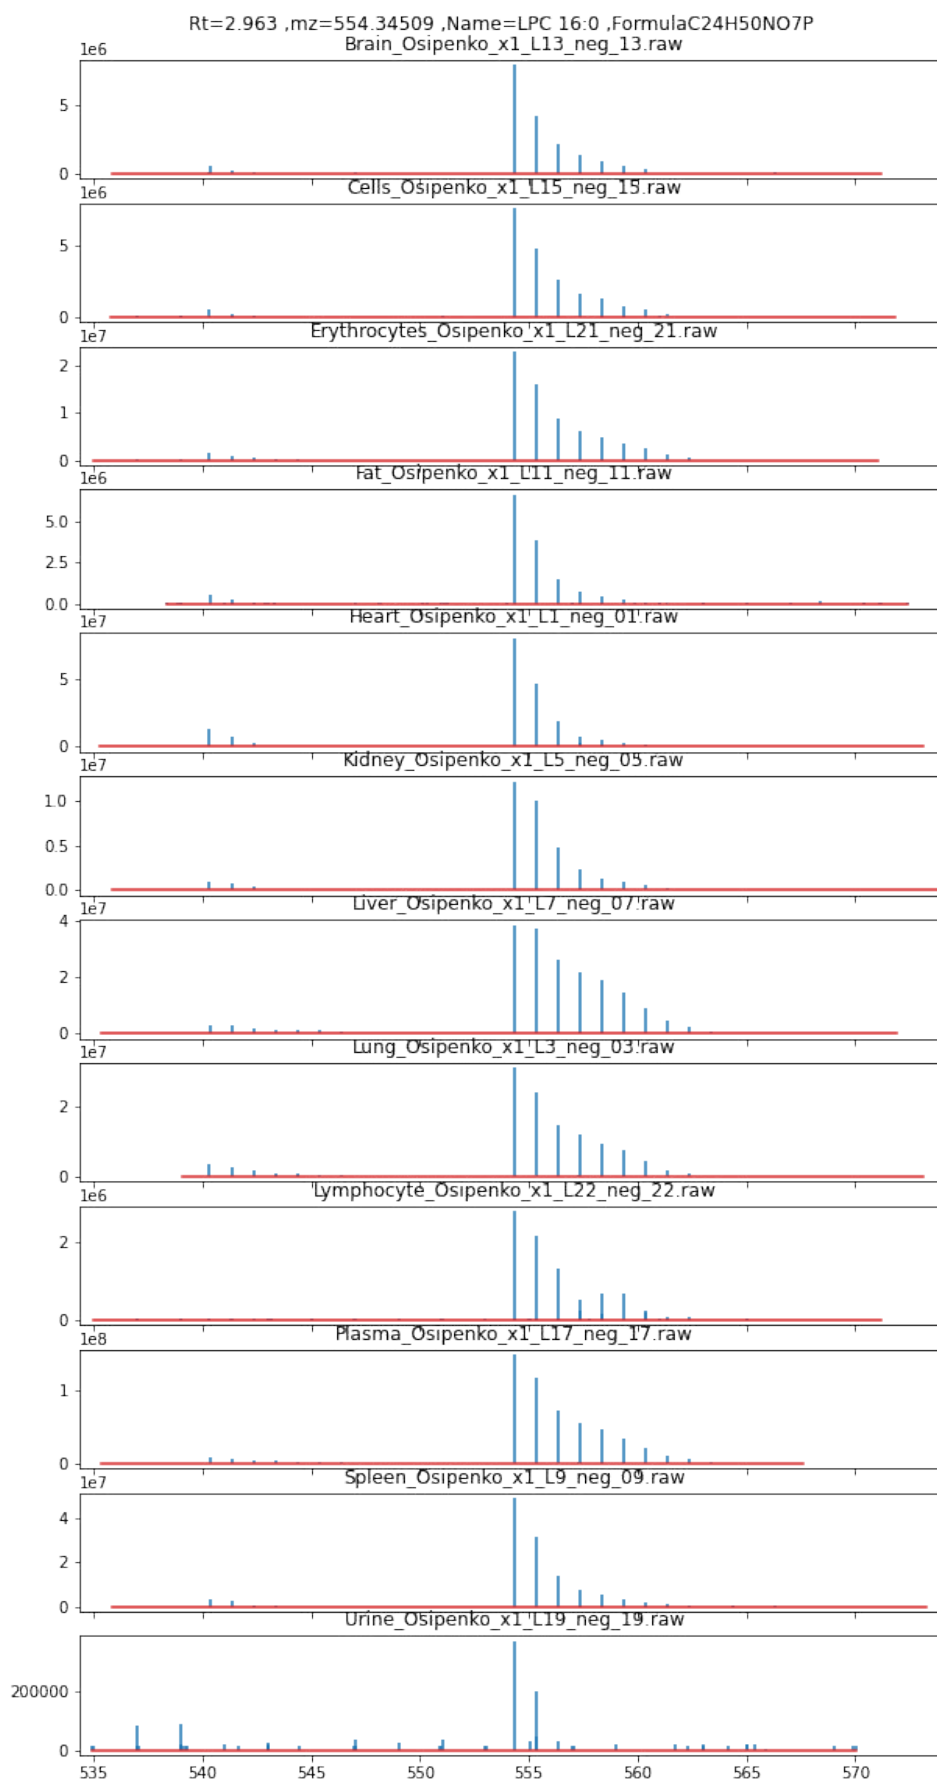

Rt=3.001 ,mz=526.29364 ,Name=LPE 22:5 ,FormulaC27H46NO7P  
Brain\_Osipenko\_x1\_L13\_neg\_13.raw

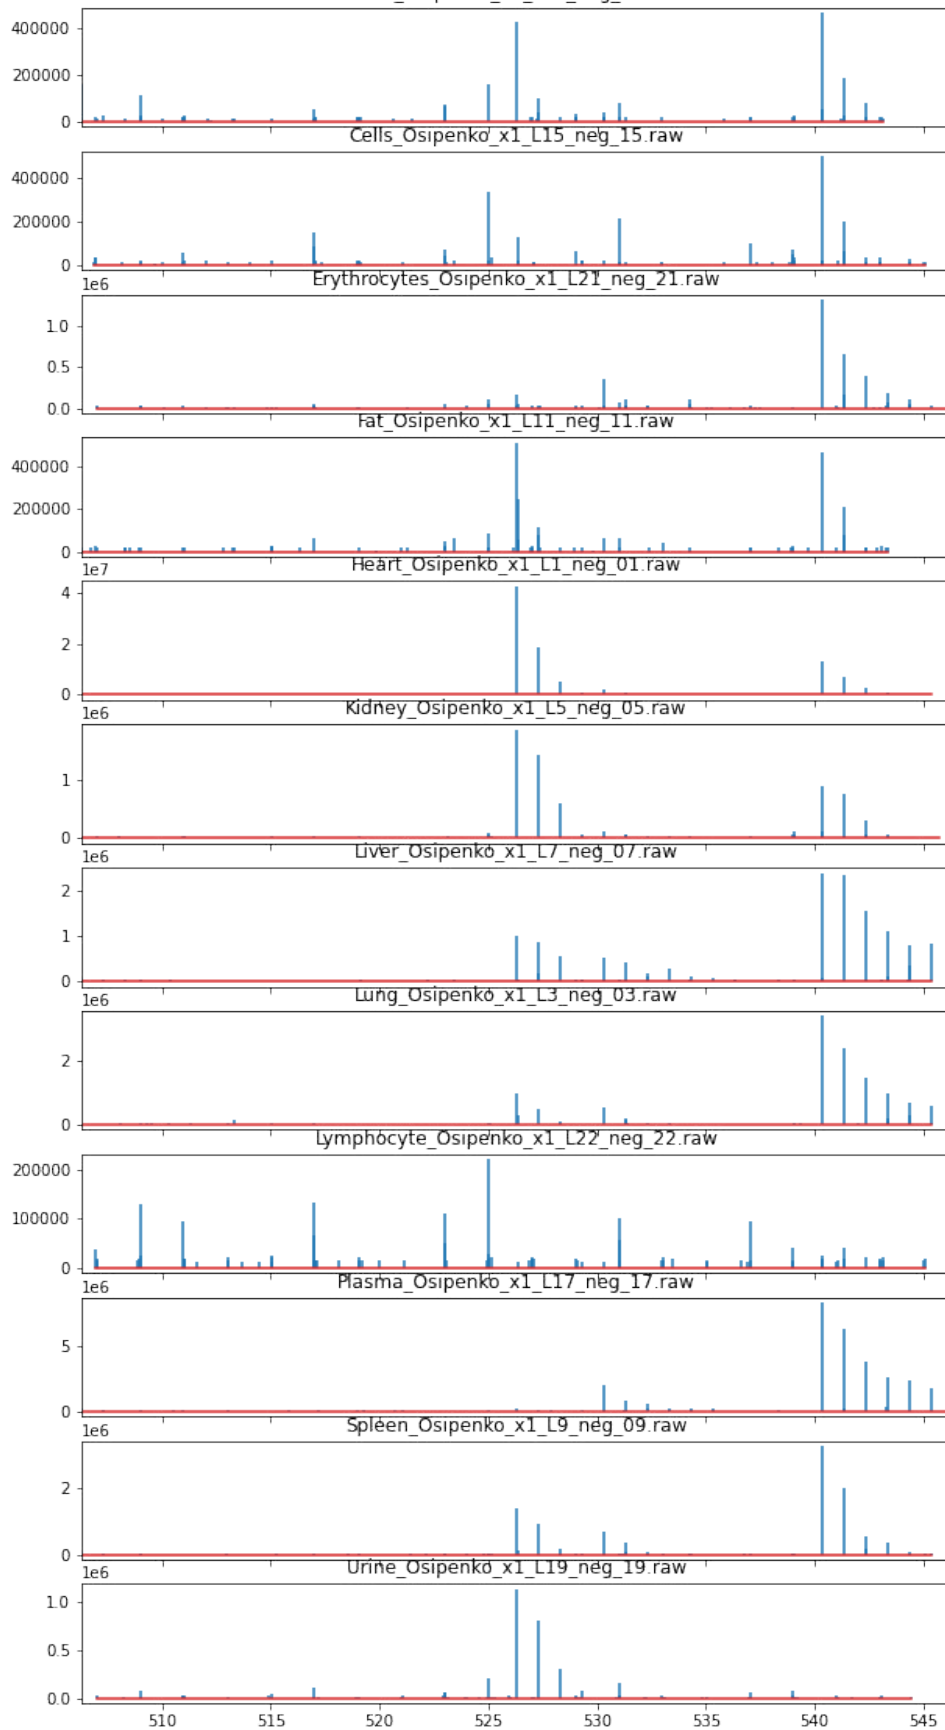

Rt=3.025 ,mz=452.27866 ,Name=LPE 16:0 ,FormulaC21H44NO7P  
Brain\_Osipenko\_x1\_L13\_neg\_13.raw

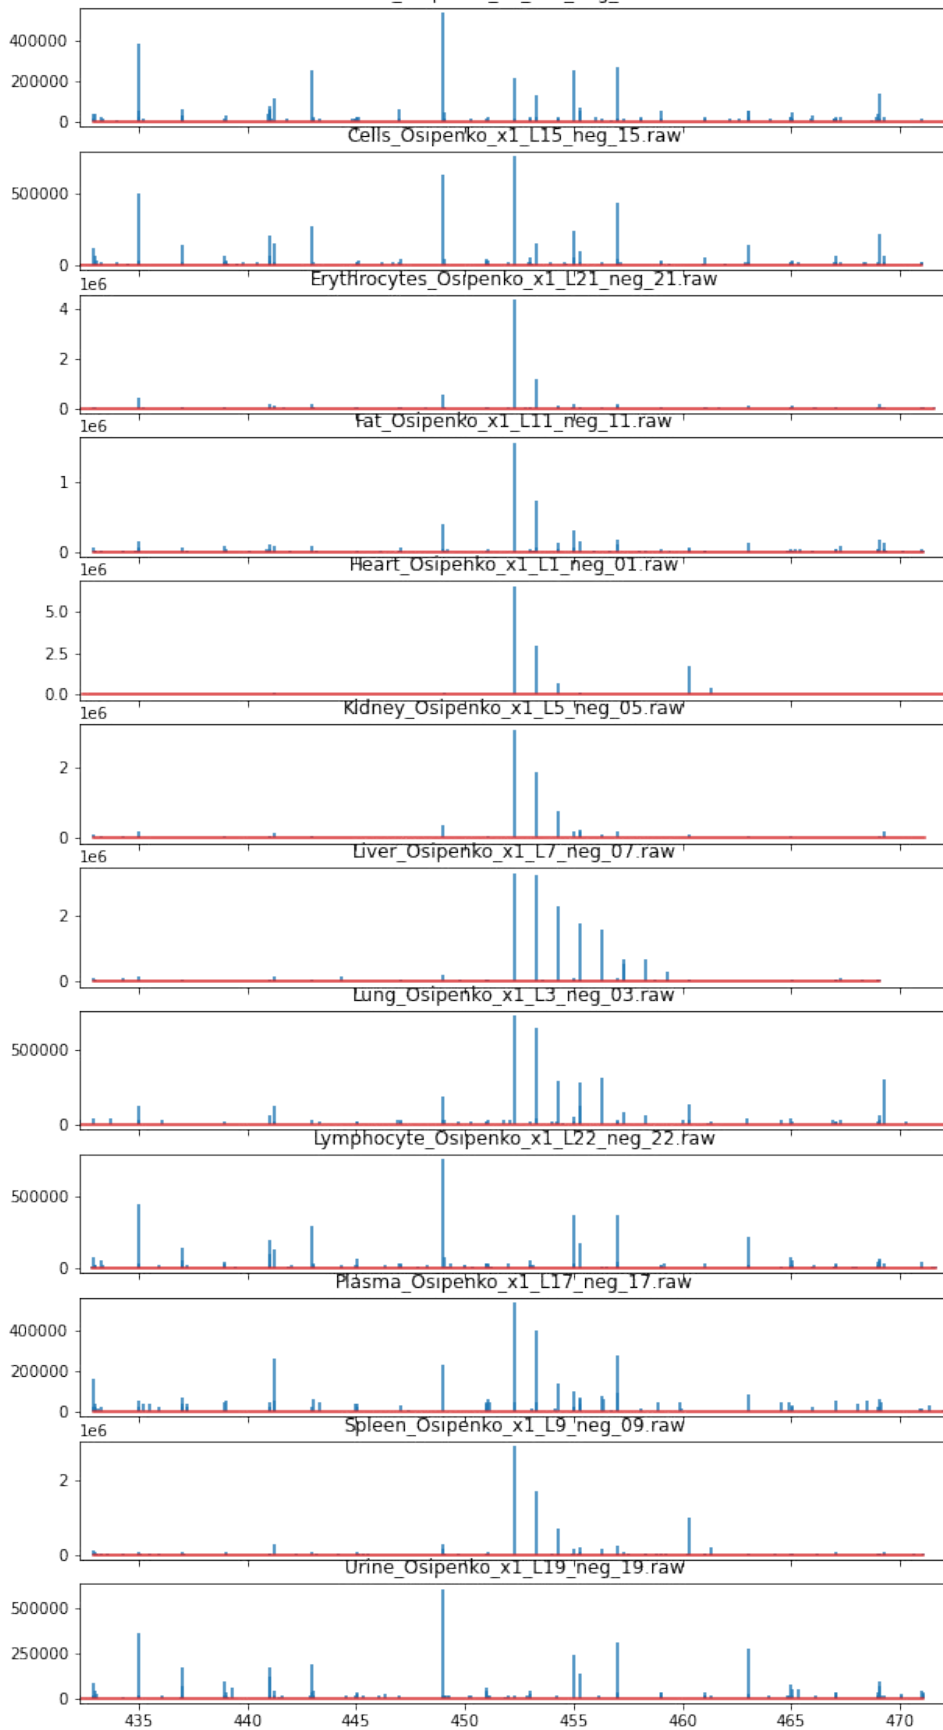

Rt=3.92 ,mz=303.23248 ,Name=FA 20:4 ,FormulaC20H32O2  
Brain\_Osipenko\_x1\_L13\_neg\_13.raw

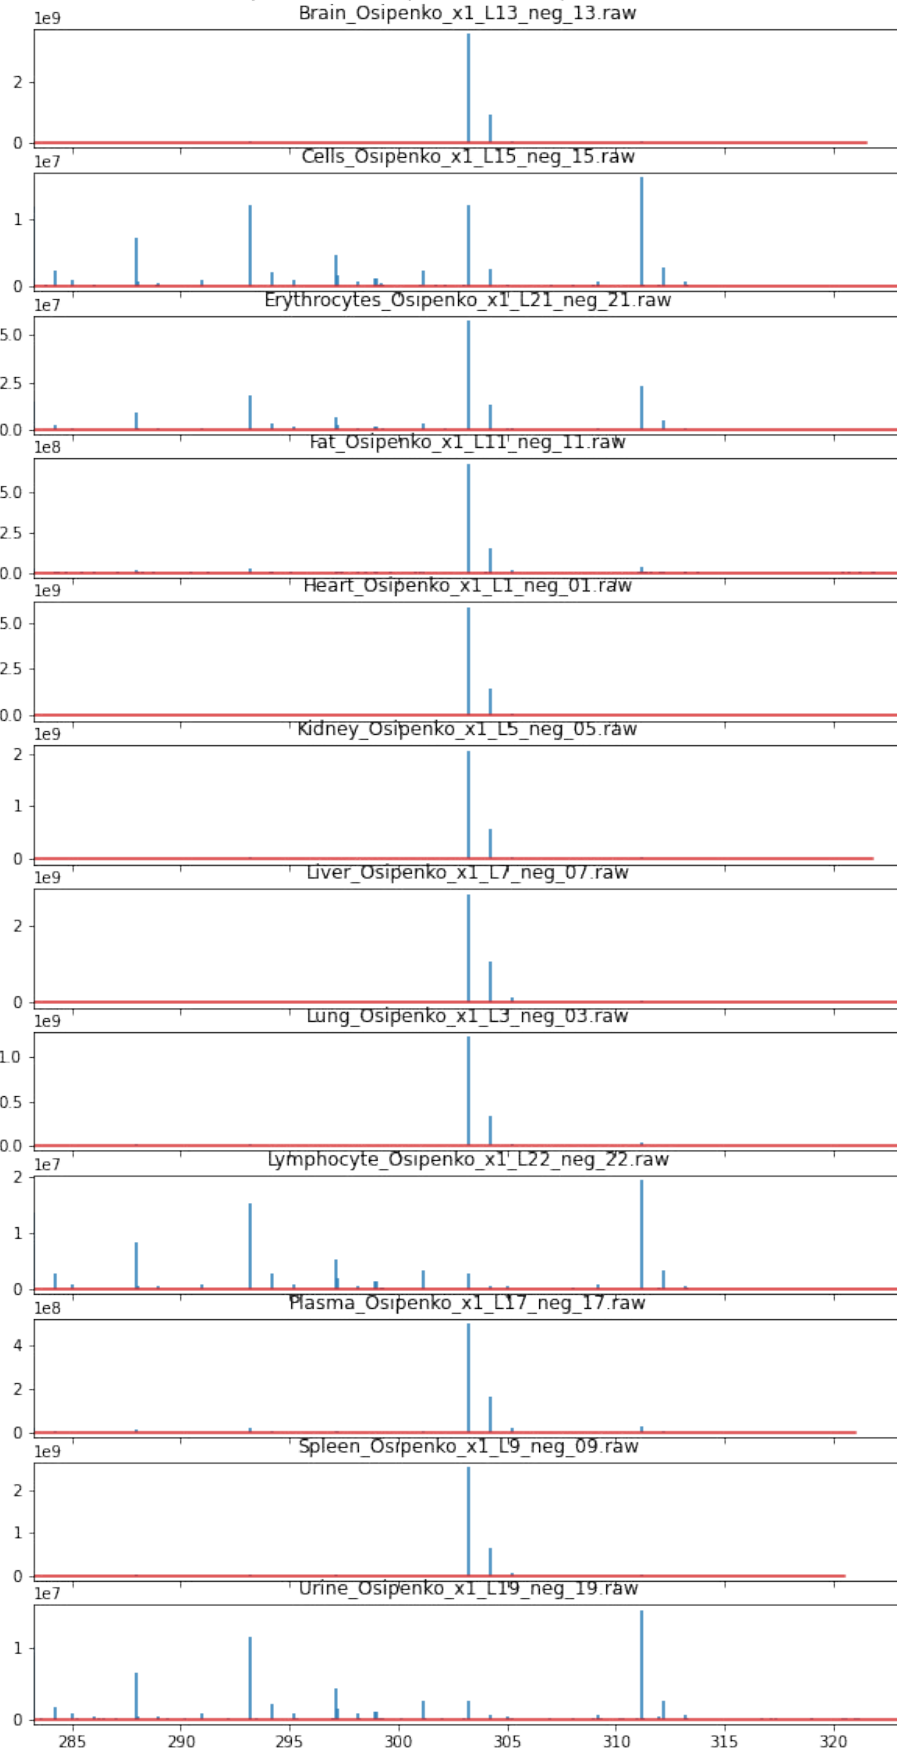

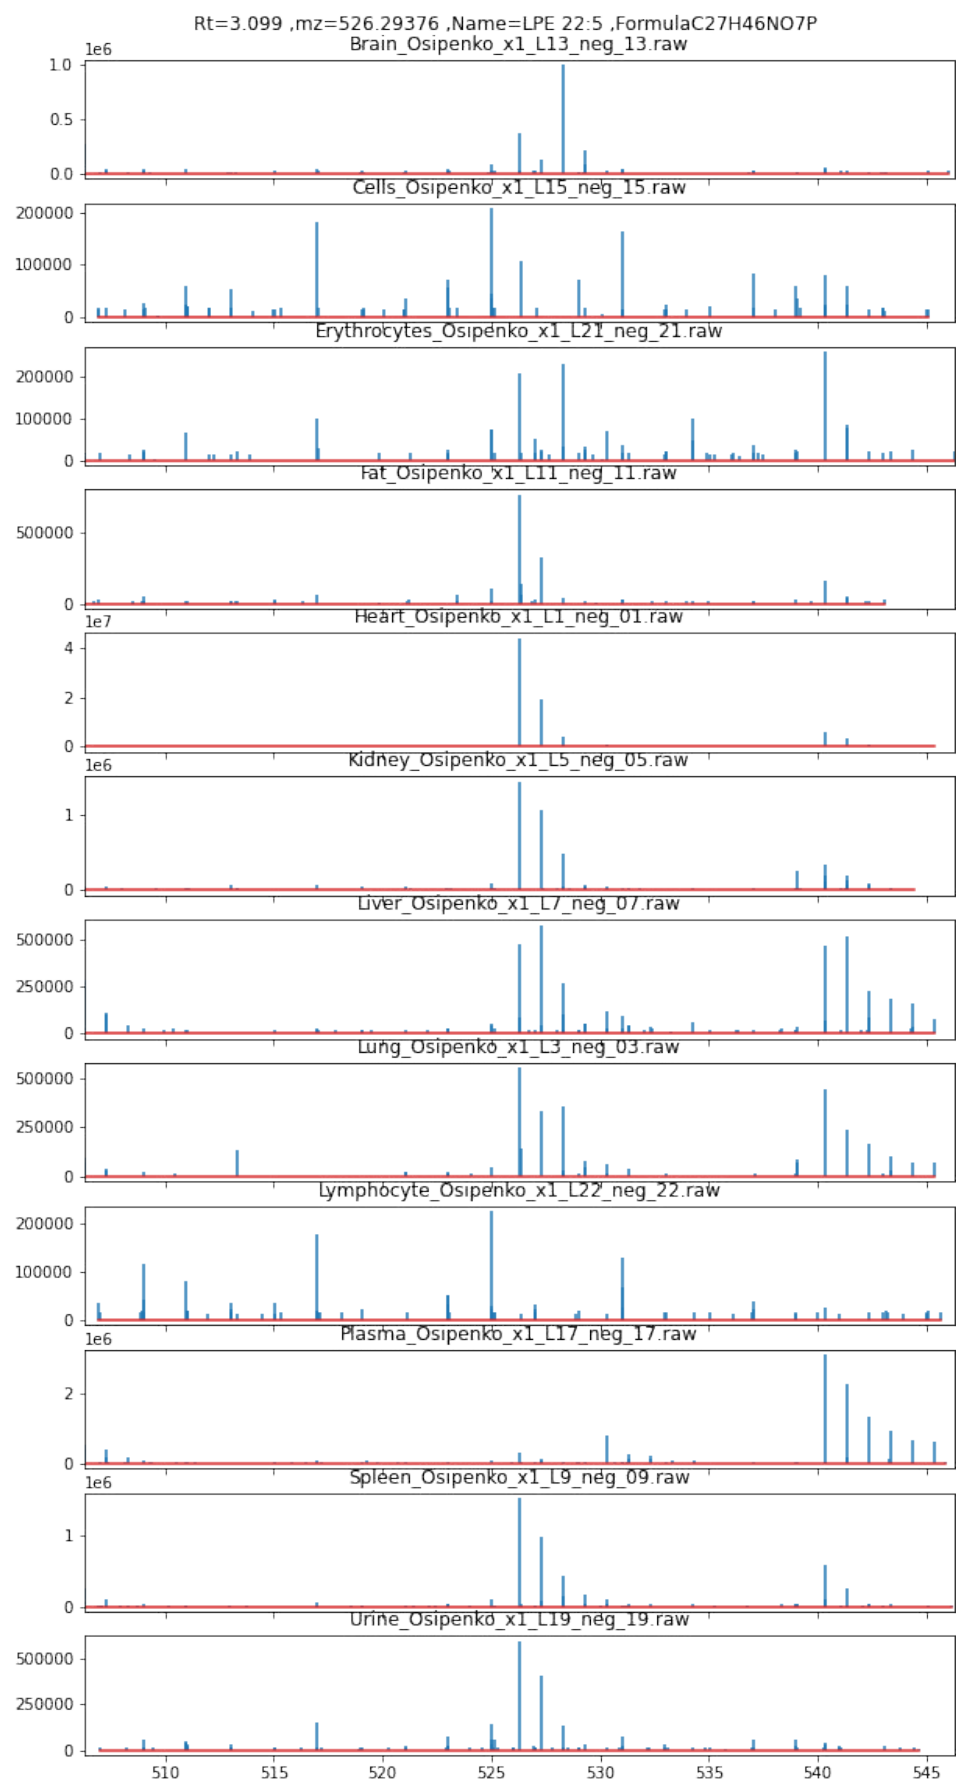

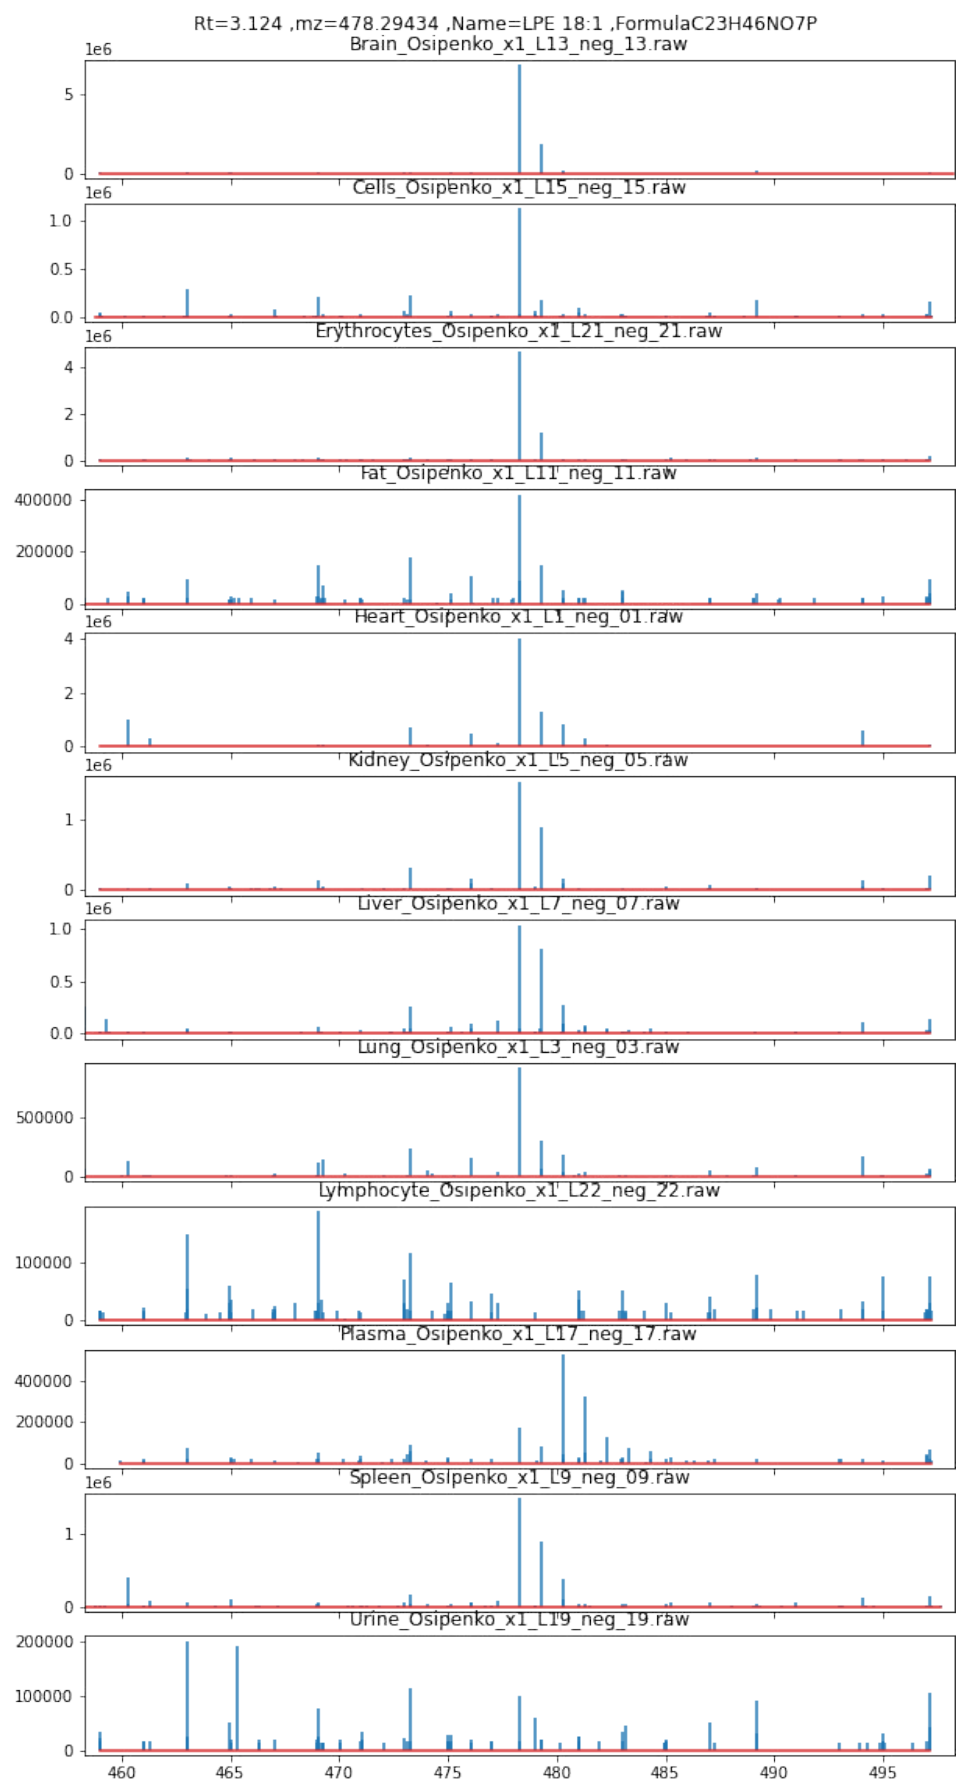

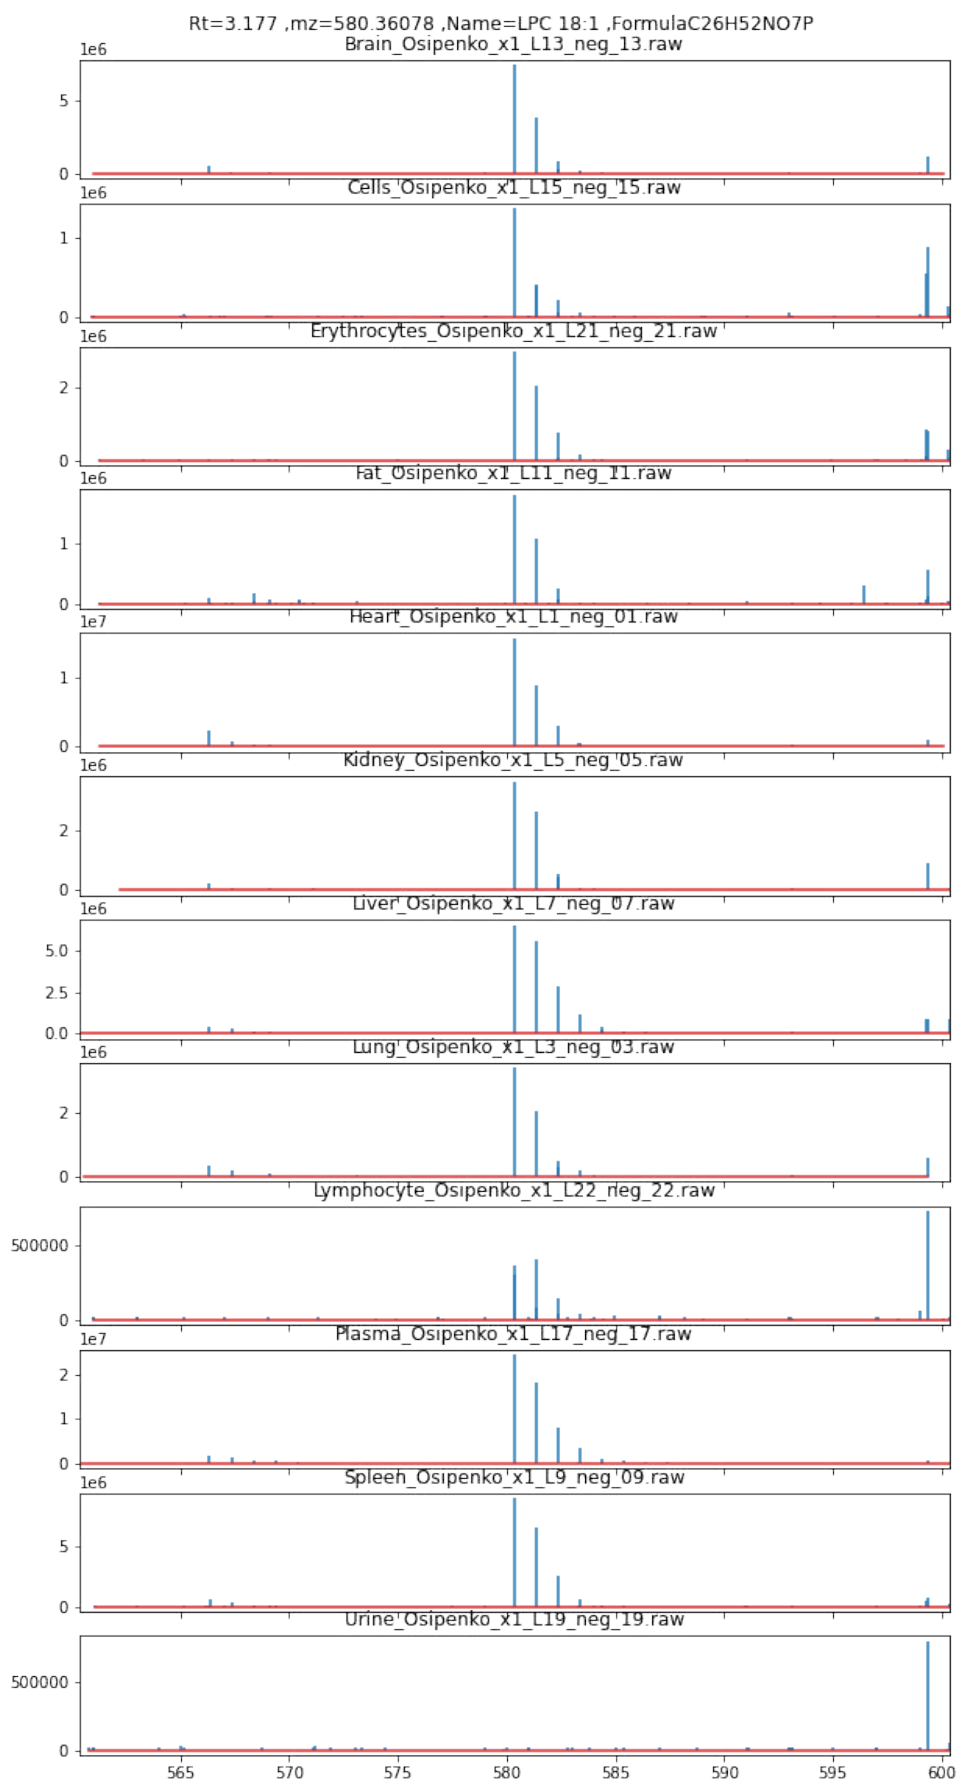



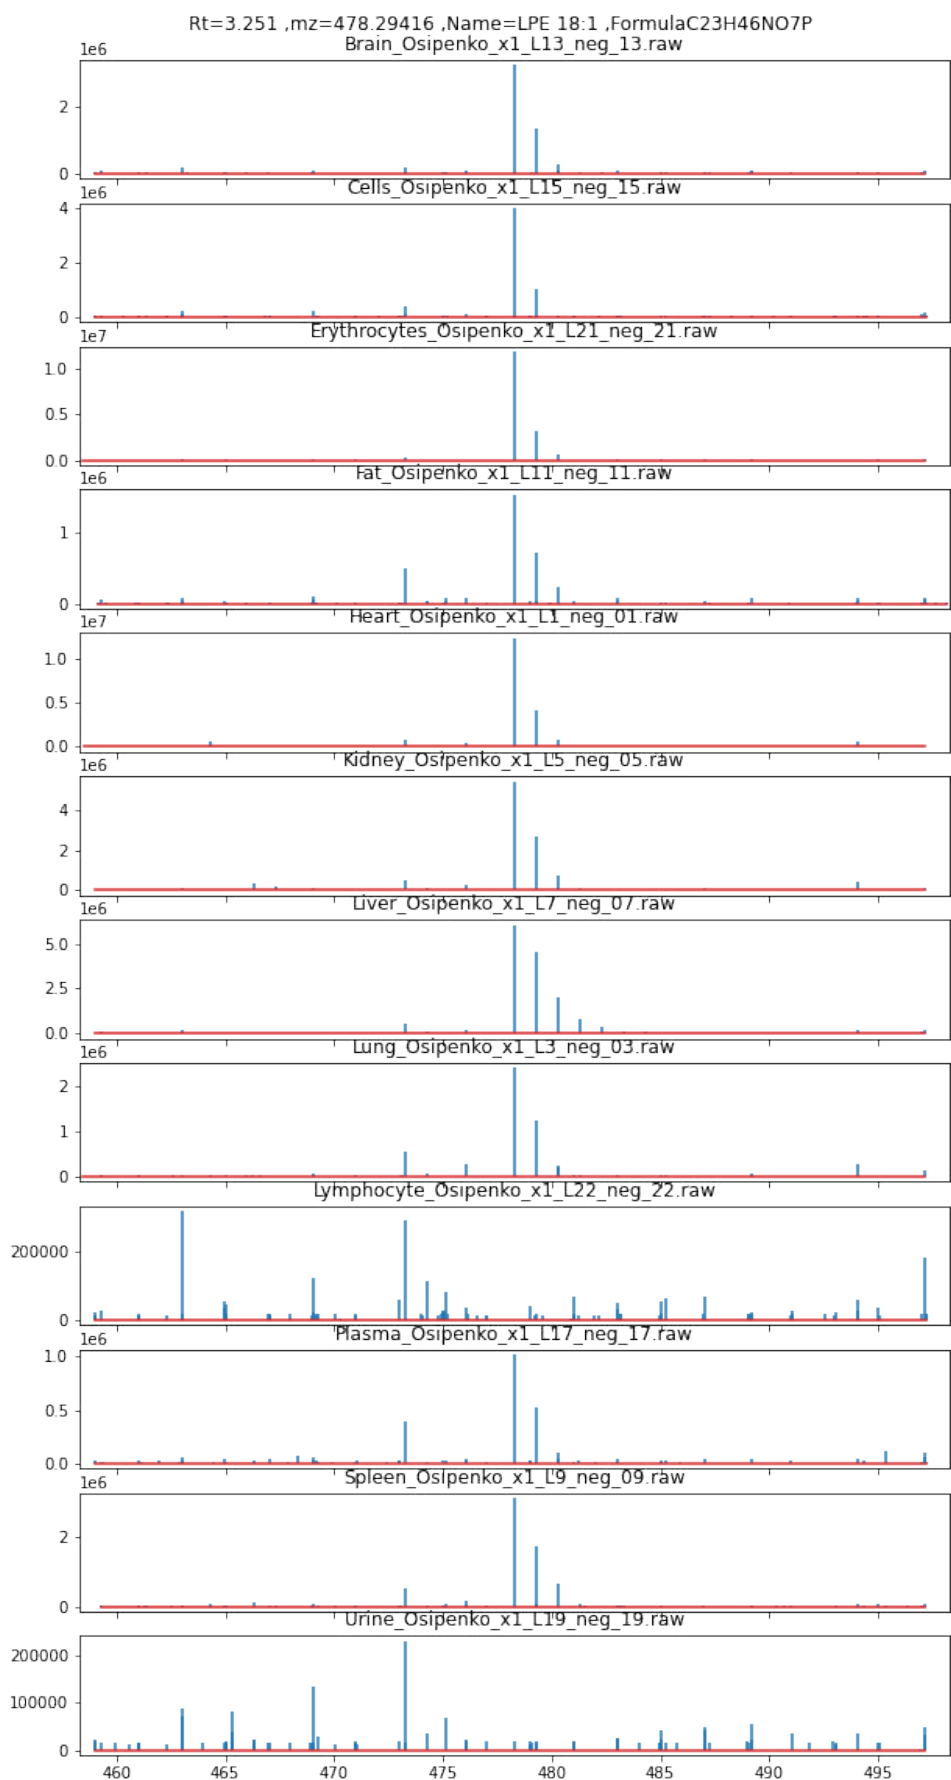

Rt=3.332 ,mz=568.36127 ,Name=LPC 17:0 ,FormulaC25H52NO7P  
Brain\_Osipenko\_x1\_L13\_neg\_13.raw

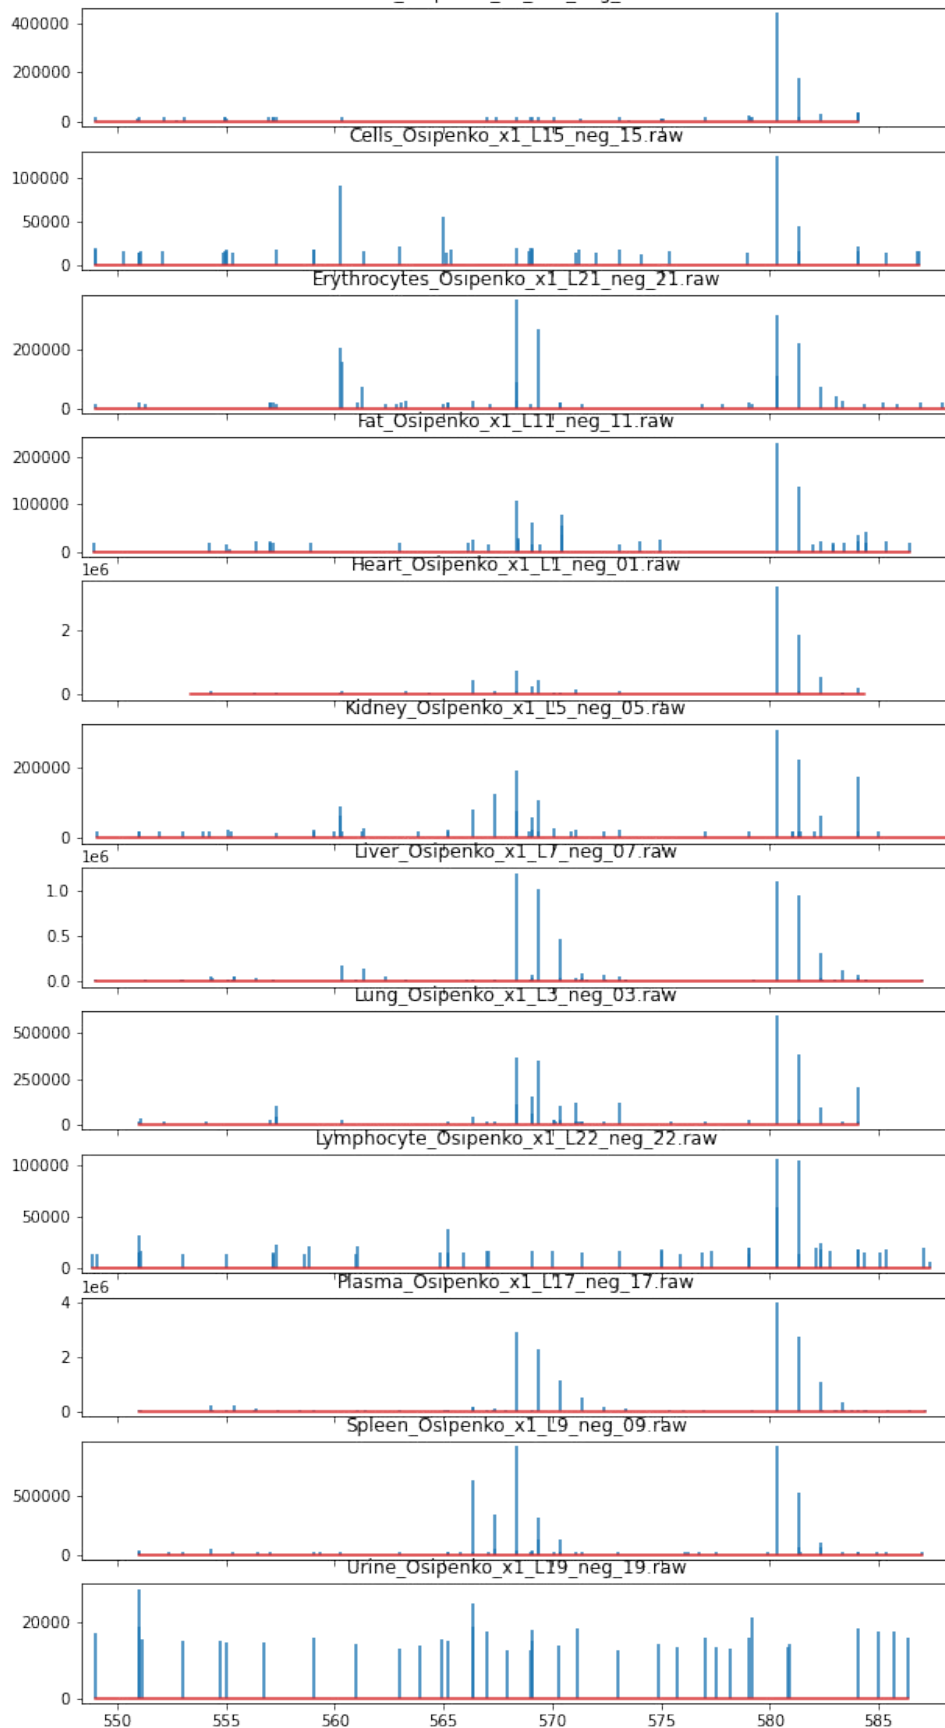

Rt=3.498 ,mz=327.23212 ,Name=FA 22:6 ,FormulaC22H32O2  
Brain\_Osipenko\_x1\_L13\_neg\_13.raw

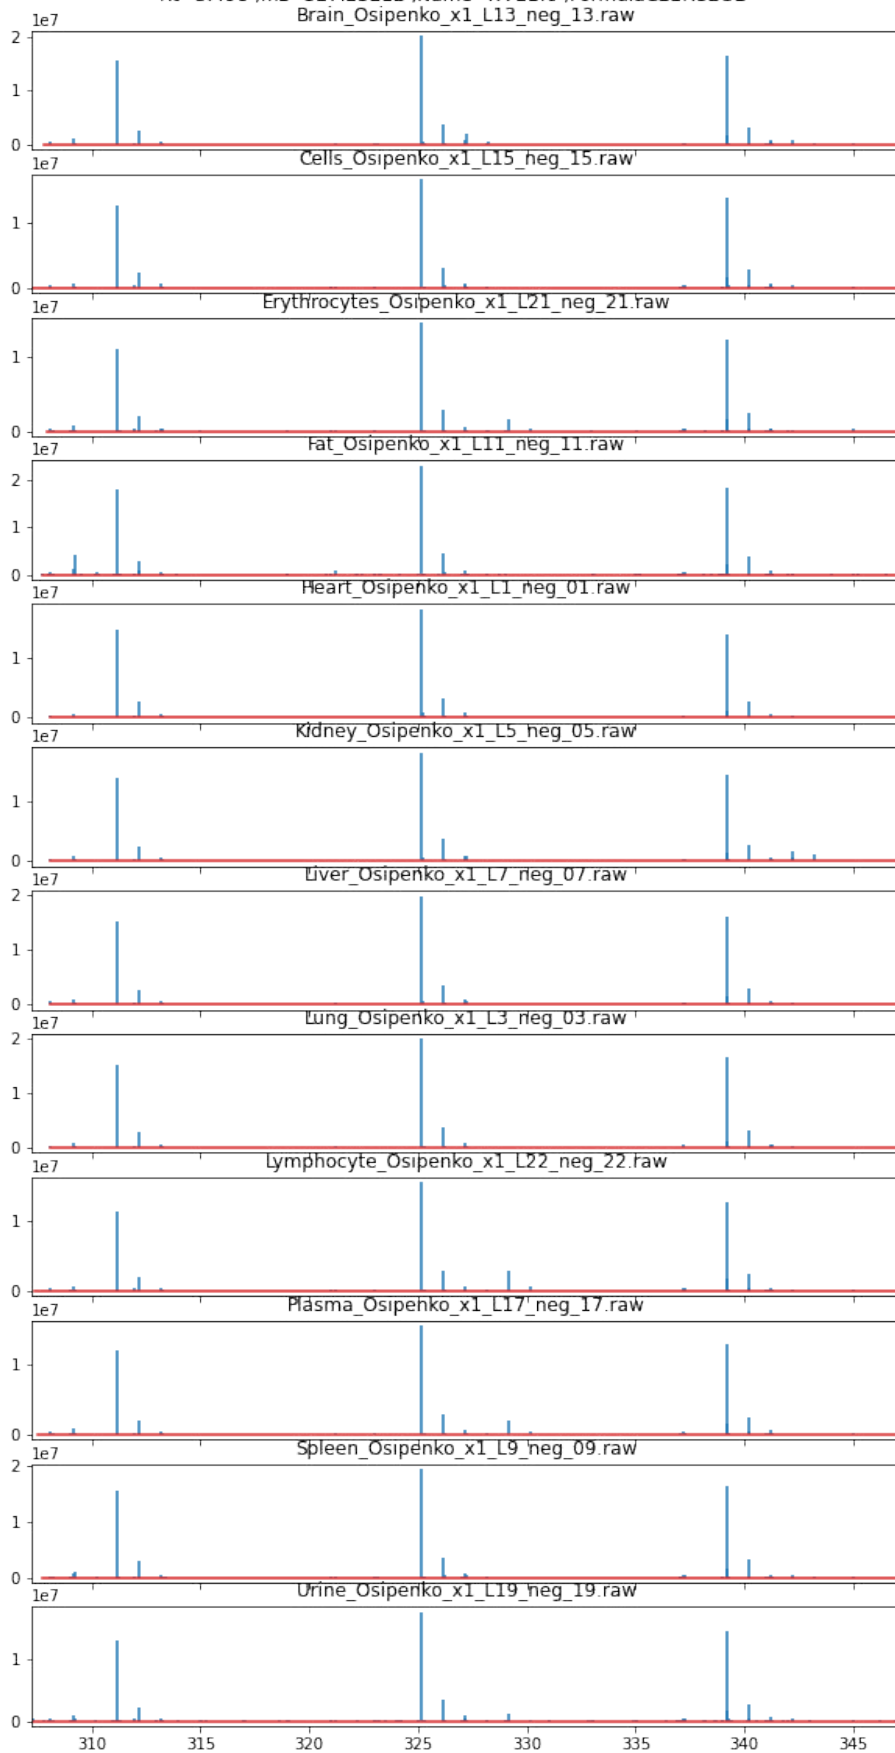

Rt=3.552 ,mz=227.20116 ,Name=FA 14:0 ,FormulaC14H28O2  
Brain\_Osipenko\_x1\_L13\_neg\_13.raw

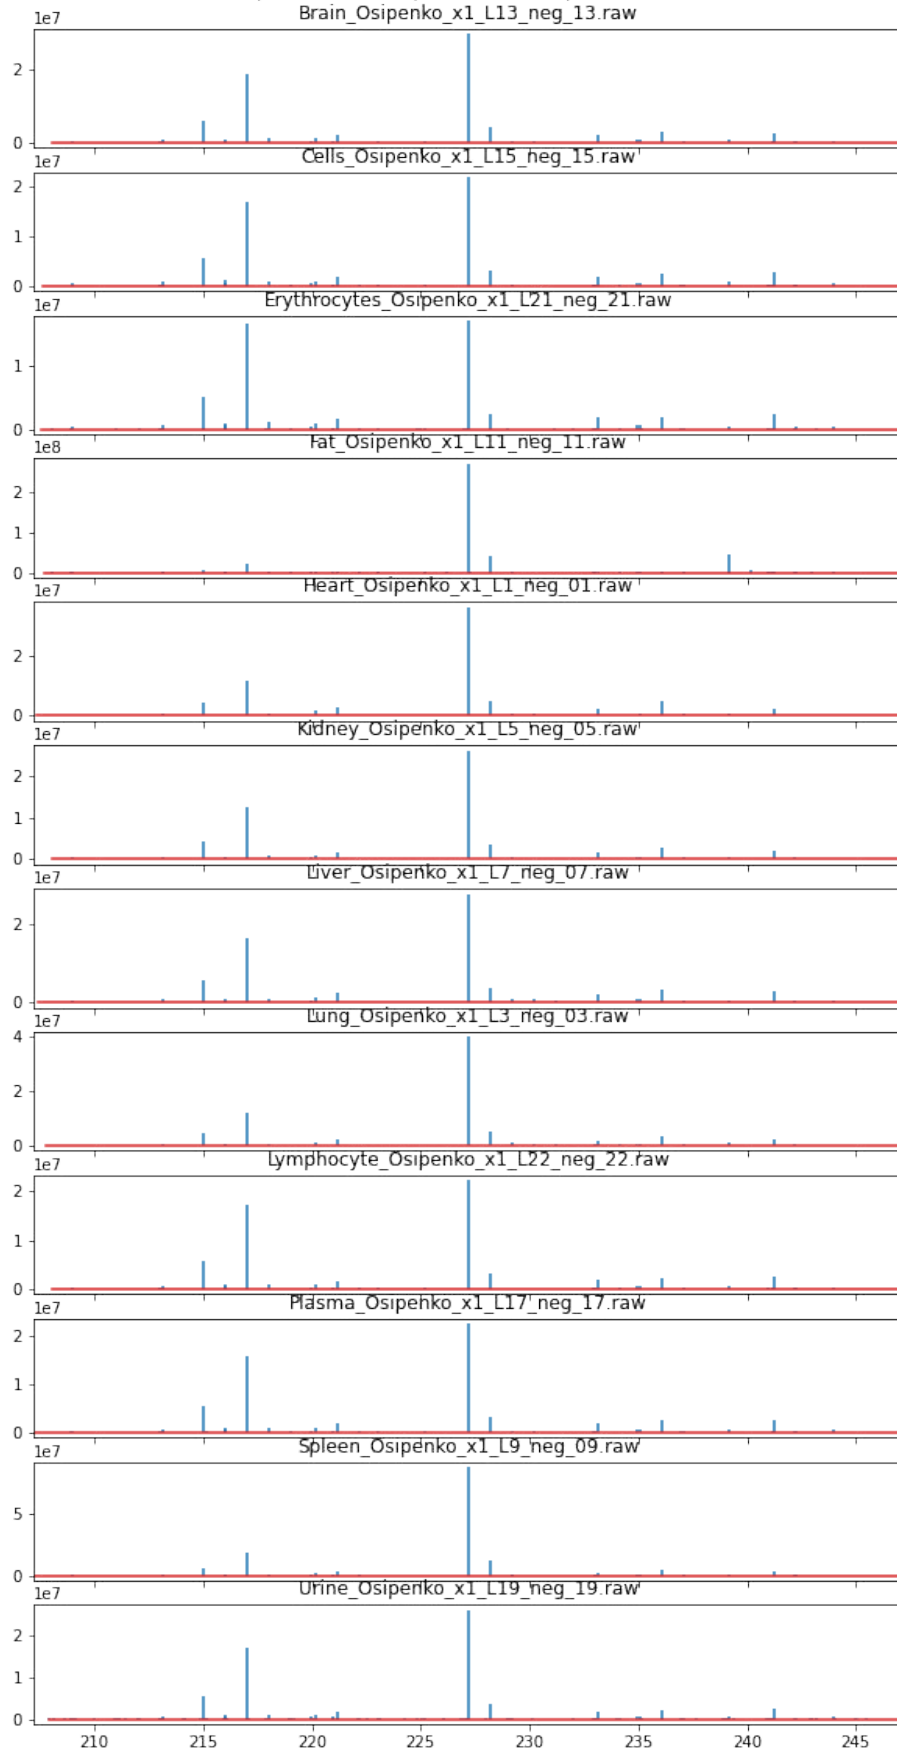

Rt=3.619 ,mz=255.23233 ,Name=FA 16:0 ,FormulaC16H32O2  
Brain\_Osipenko\_x1\_L13\_neg\_13.raw

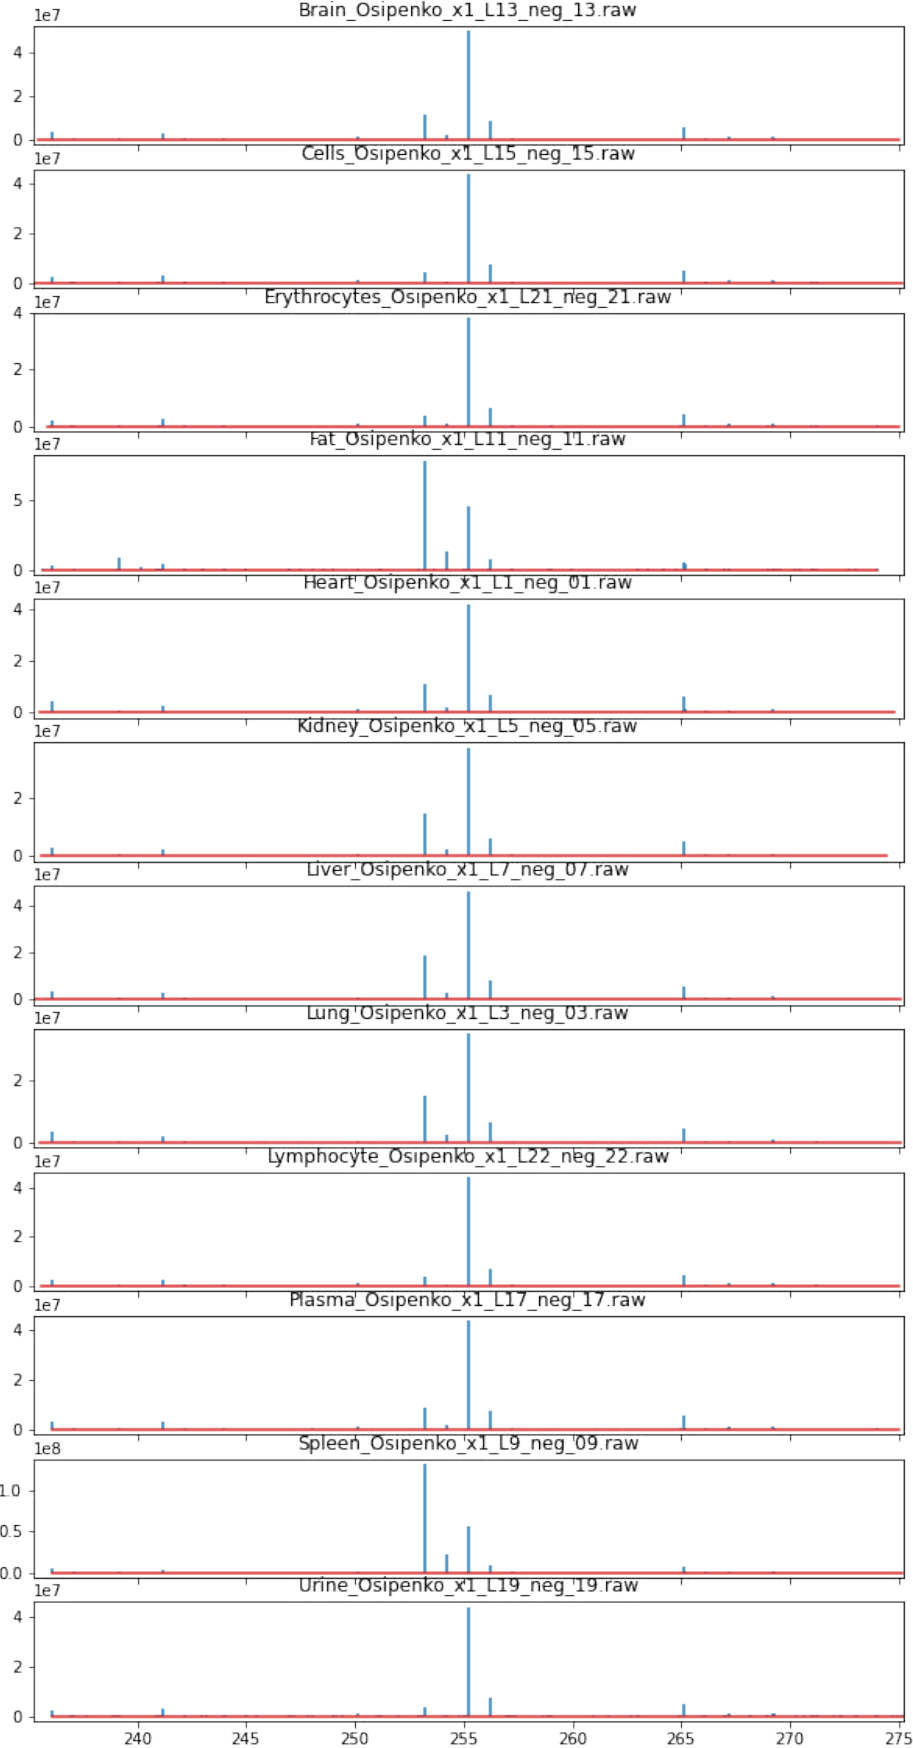

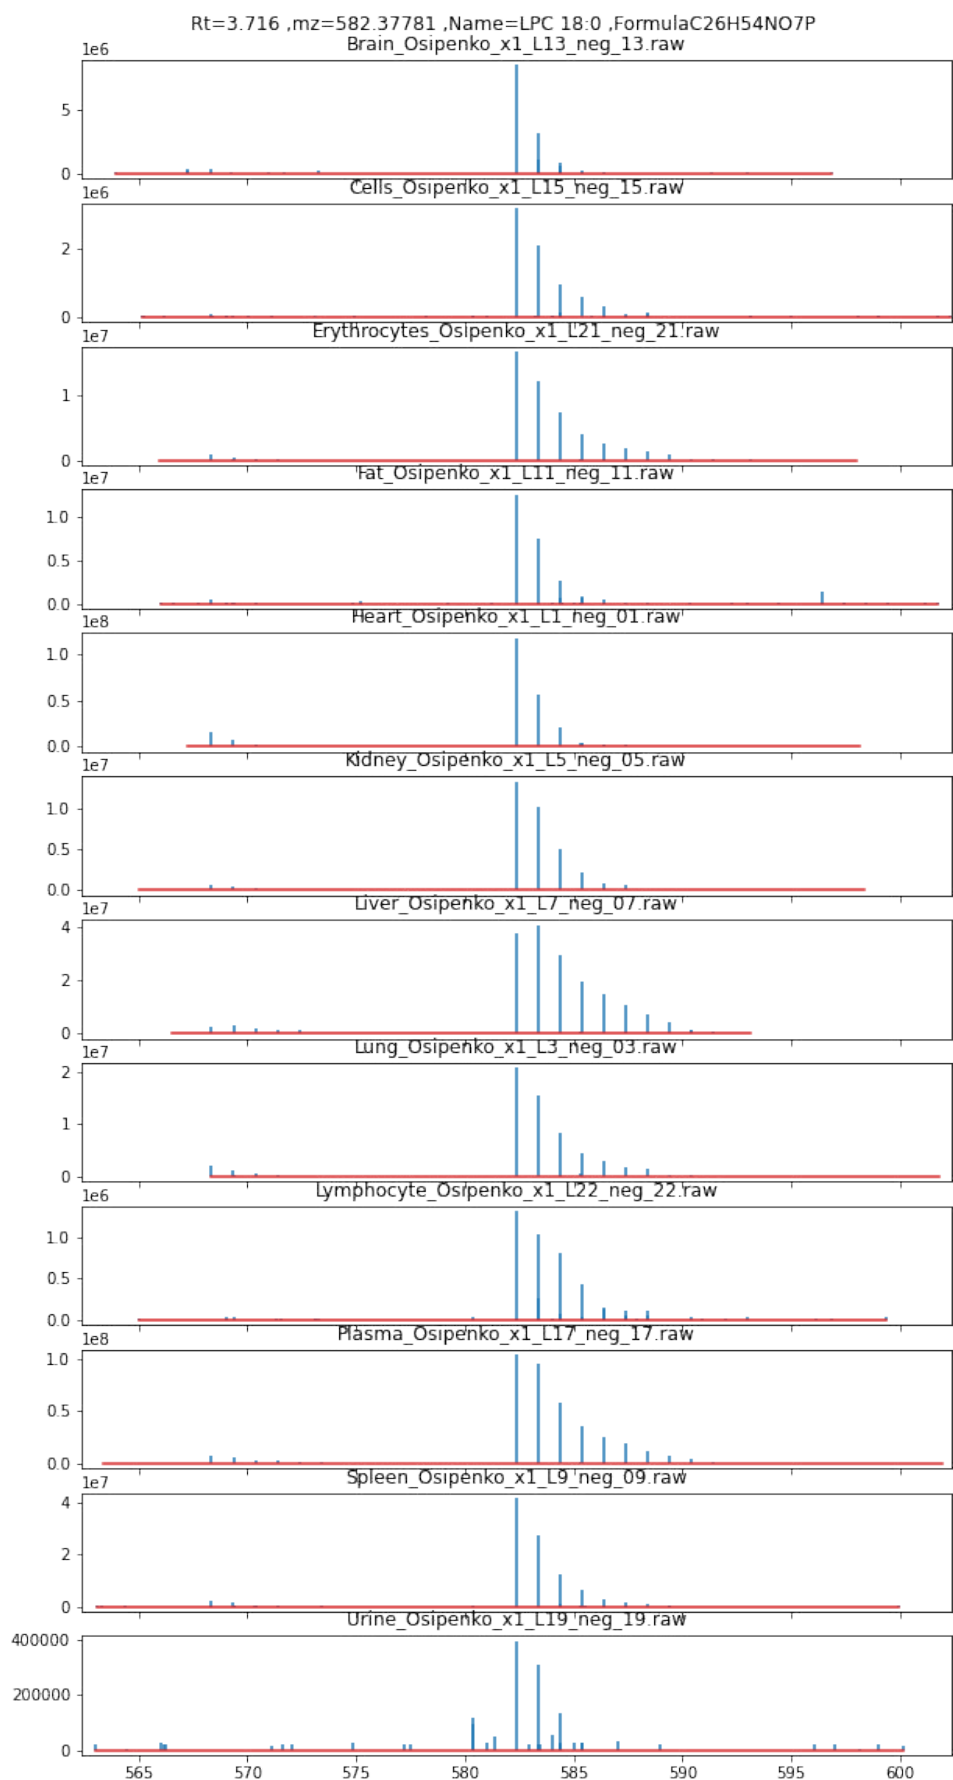

Rt=3.779 ,mz=480.30963 ,Name=LPE 18:0 ,FormulaC23H48NO7P

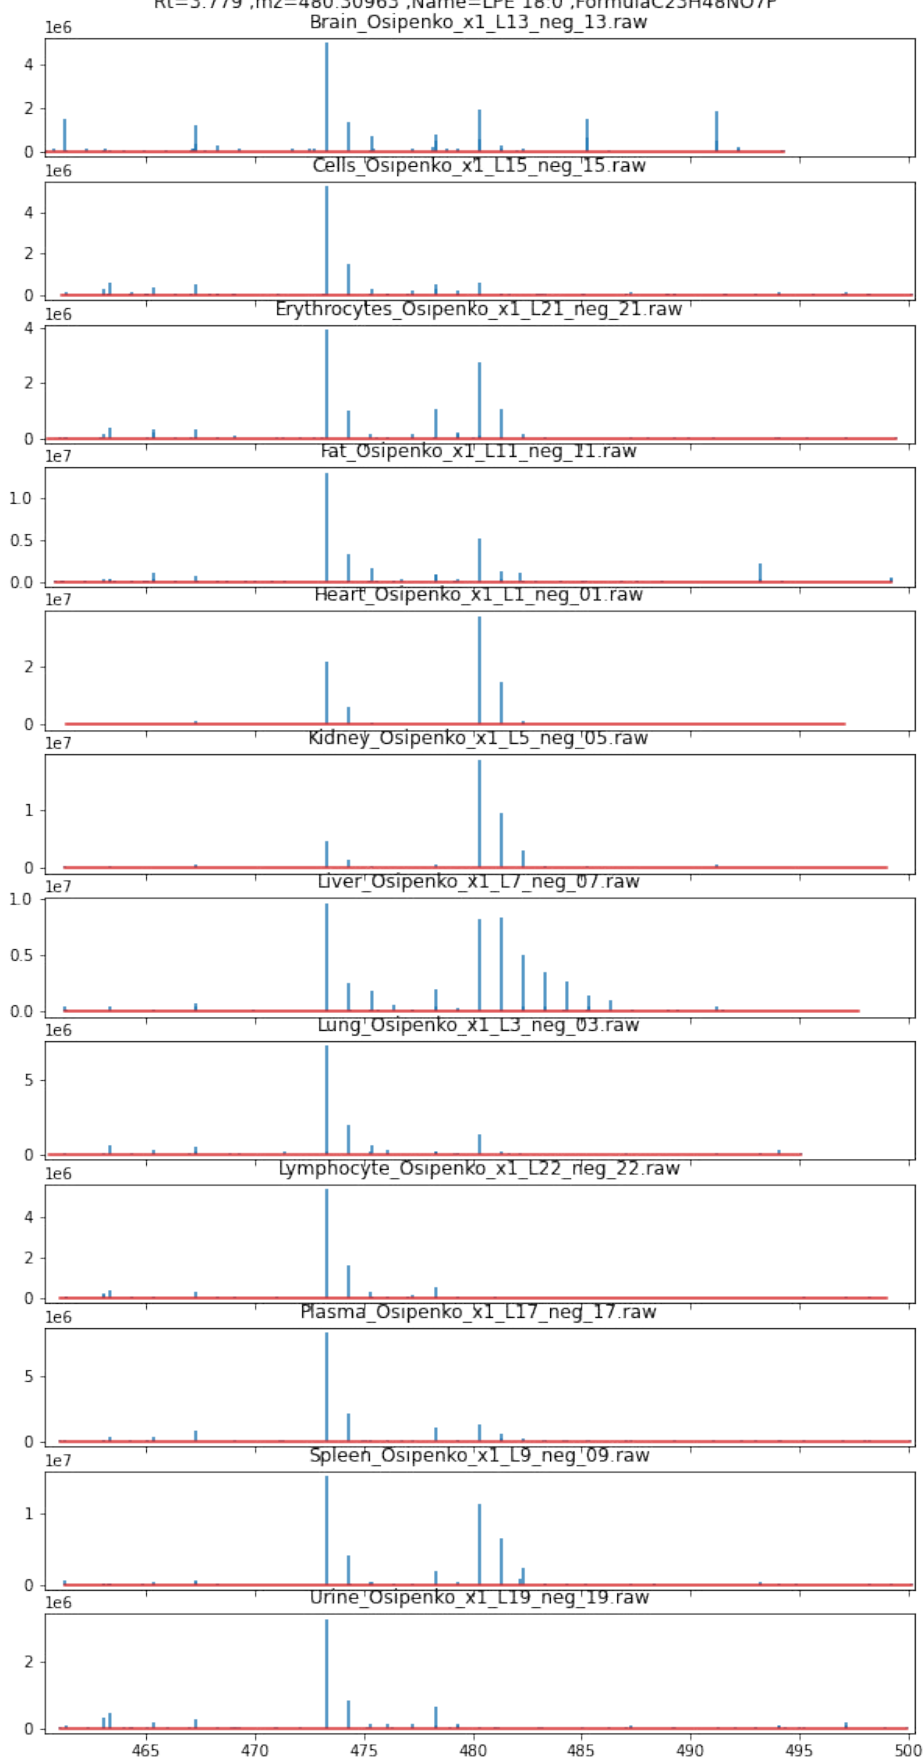

Rt=3.973 ,mz=279.23273 ,Name=FA 18:2 ,FormulaC18H32O2  
Brain\_Osipenko\_x1\_L13\_neg\_13.raw

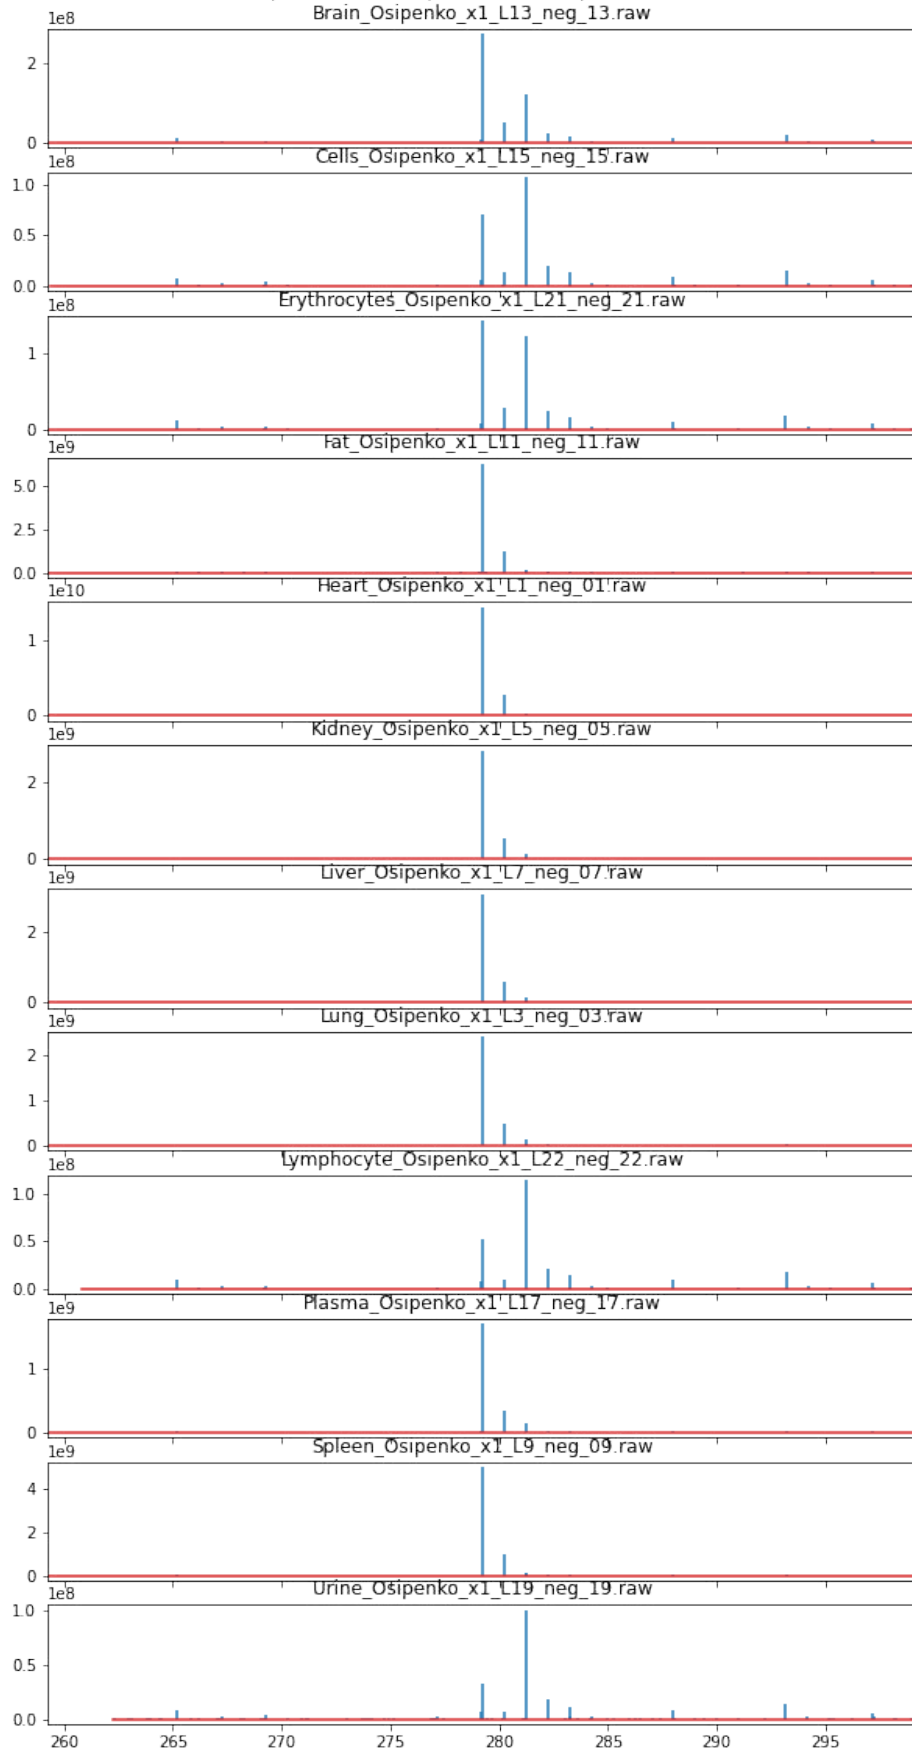



Rt=4.025 ,mz=329.2485 ,Name=FA 22:5 ,FormulaC22H34O2

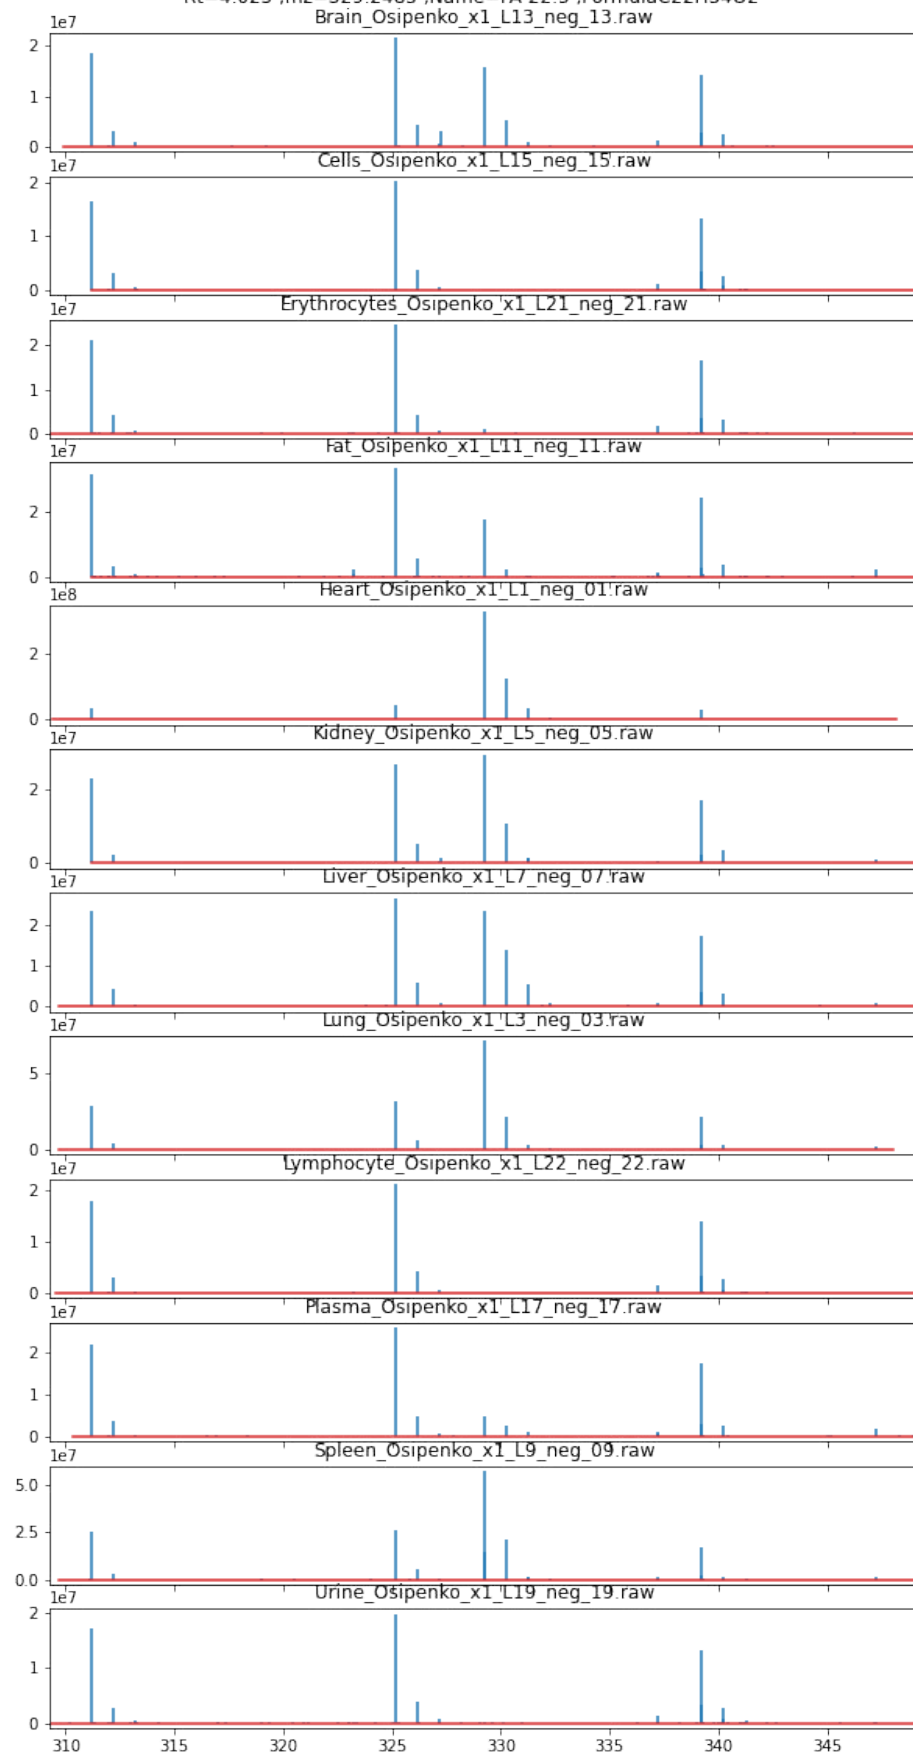

Rt=4.206 ,mz=305.24805 ,Name=FA 20:3 ,FormulaC20H34O2  
Brain\_Osipenko\_x1\_L13\_neg\_13.raw

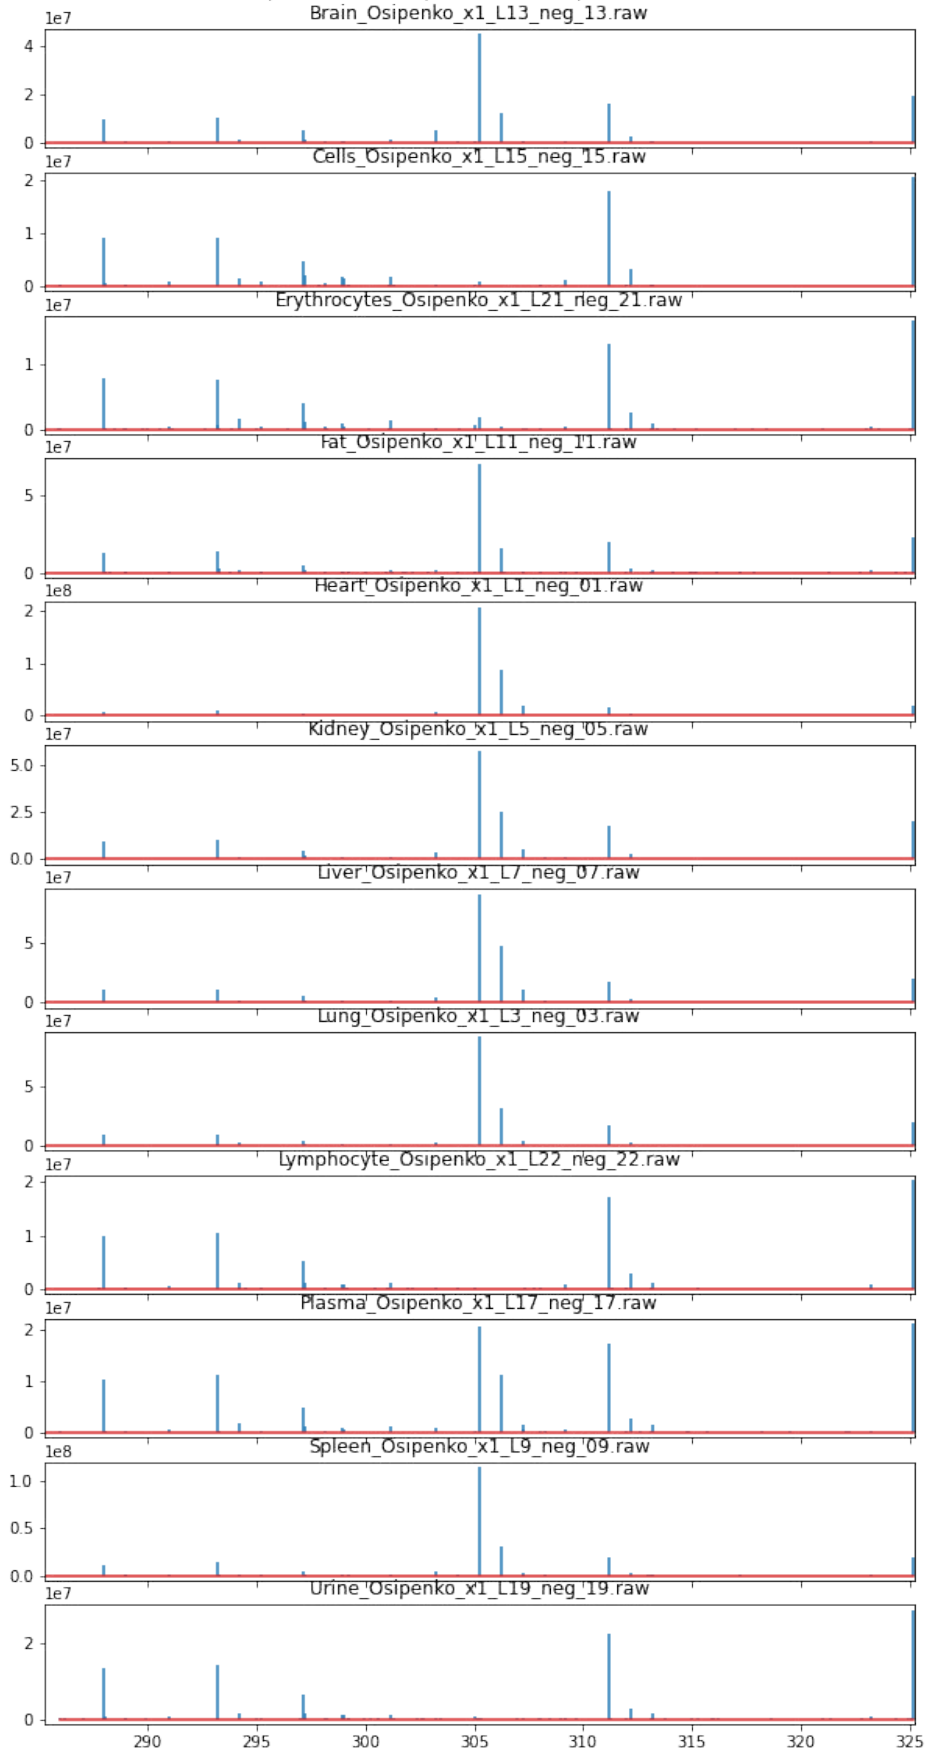

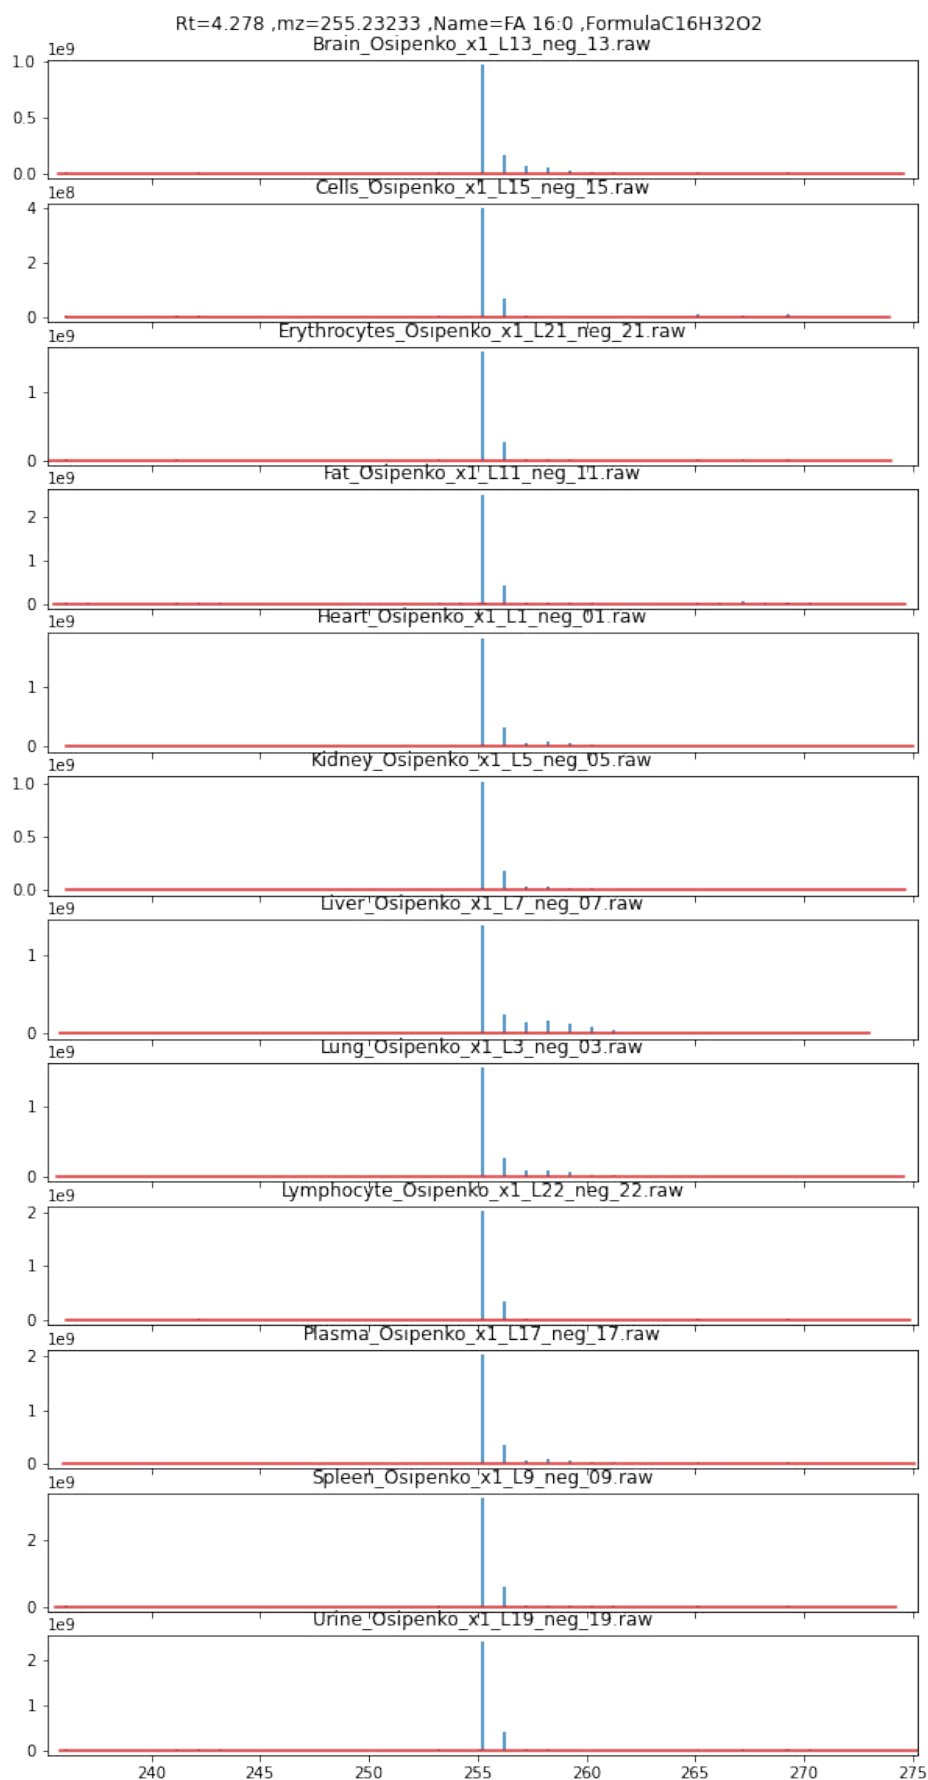

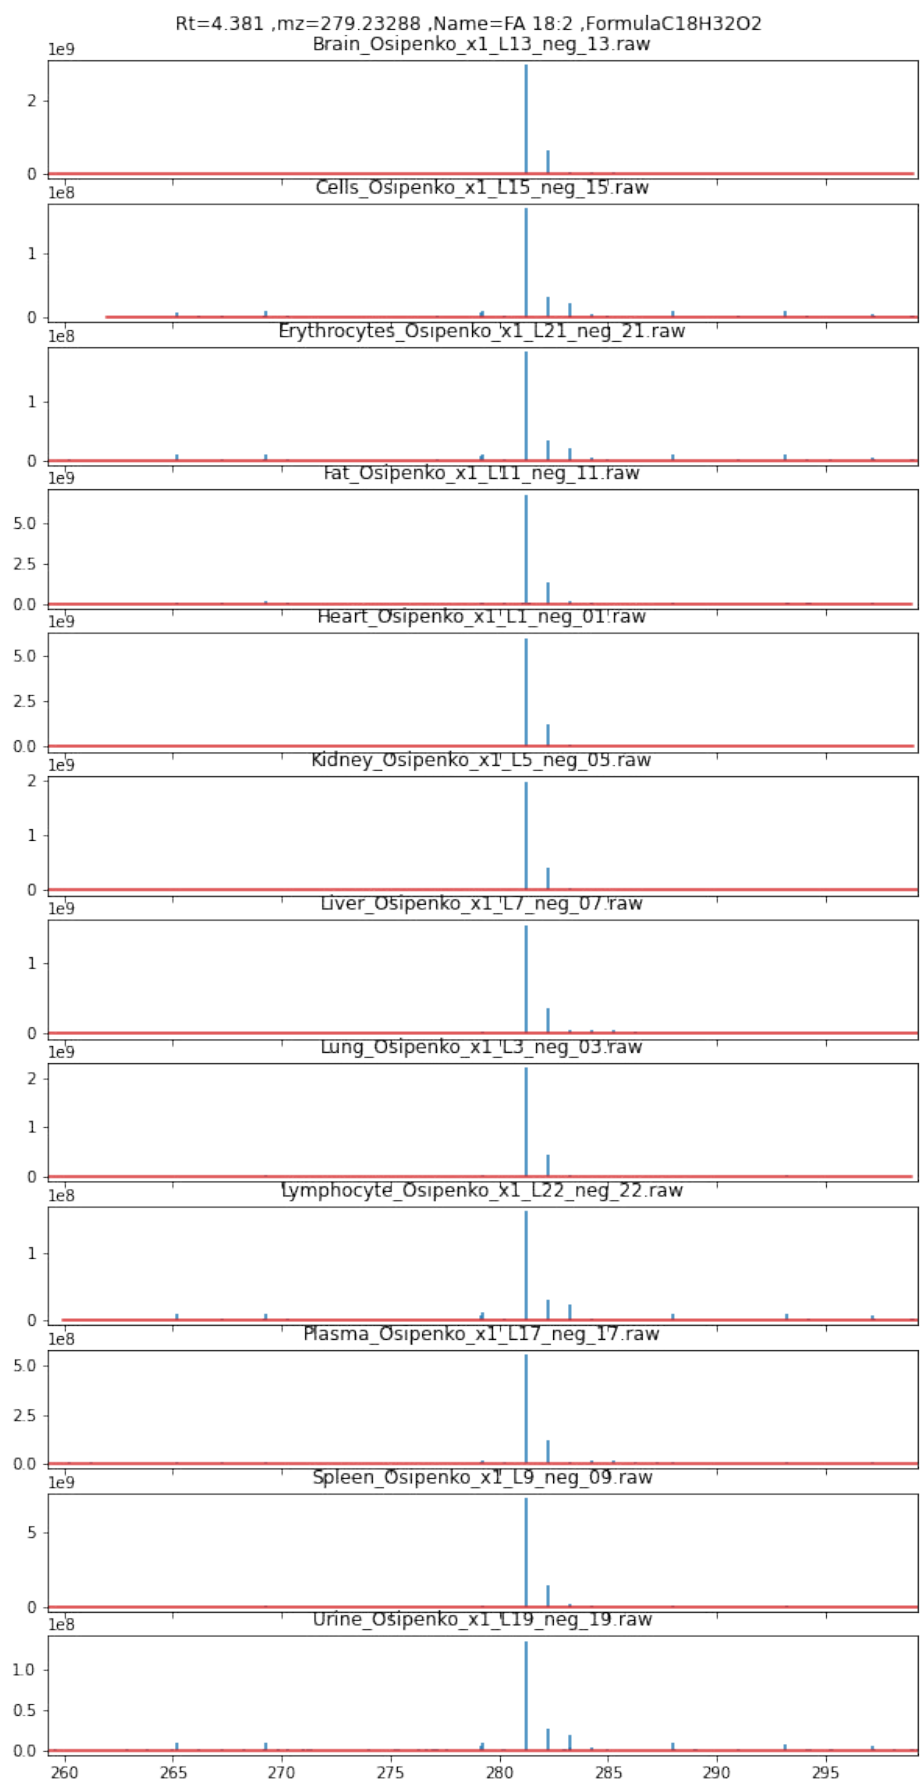

Rt=4.424 ,mz=331.26483 ,Name=FA 22:4 ,FormulaC22H36O2  
Brain\_Osipenko\_x1\_L13\_neg\_13.raw

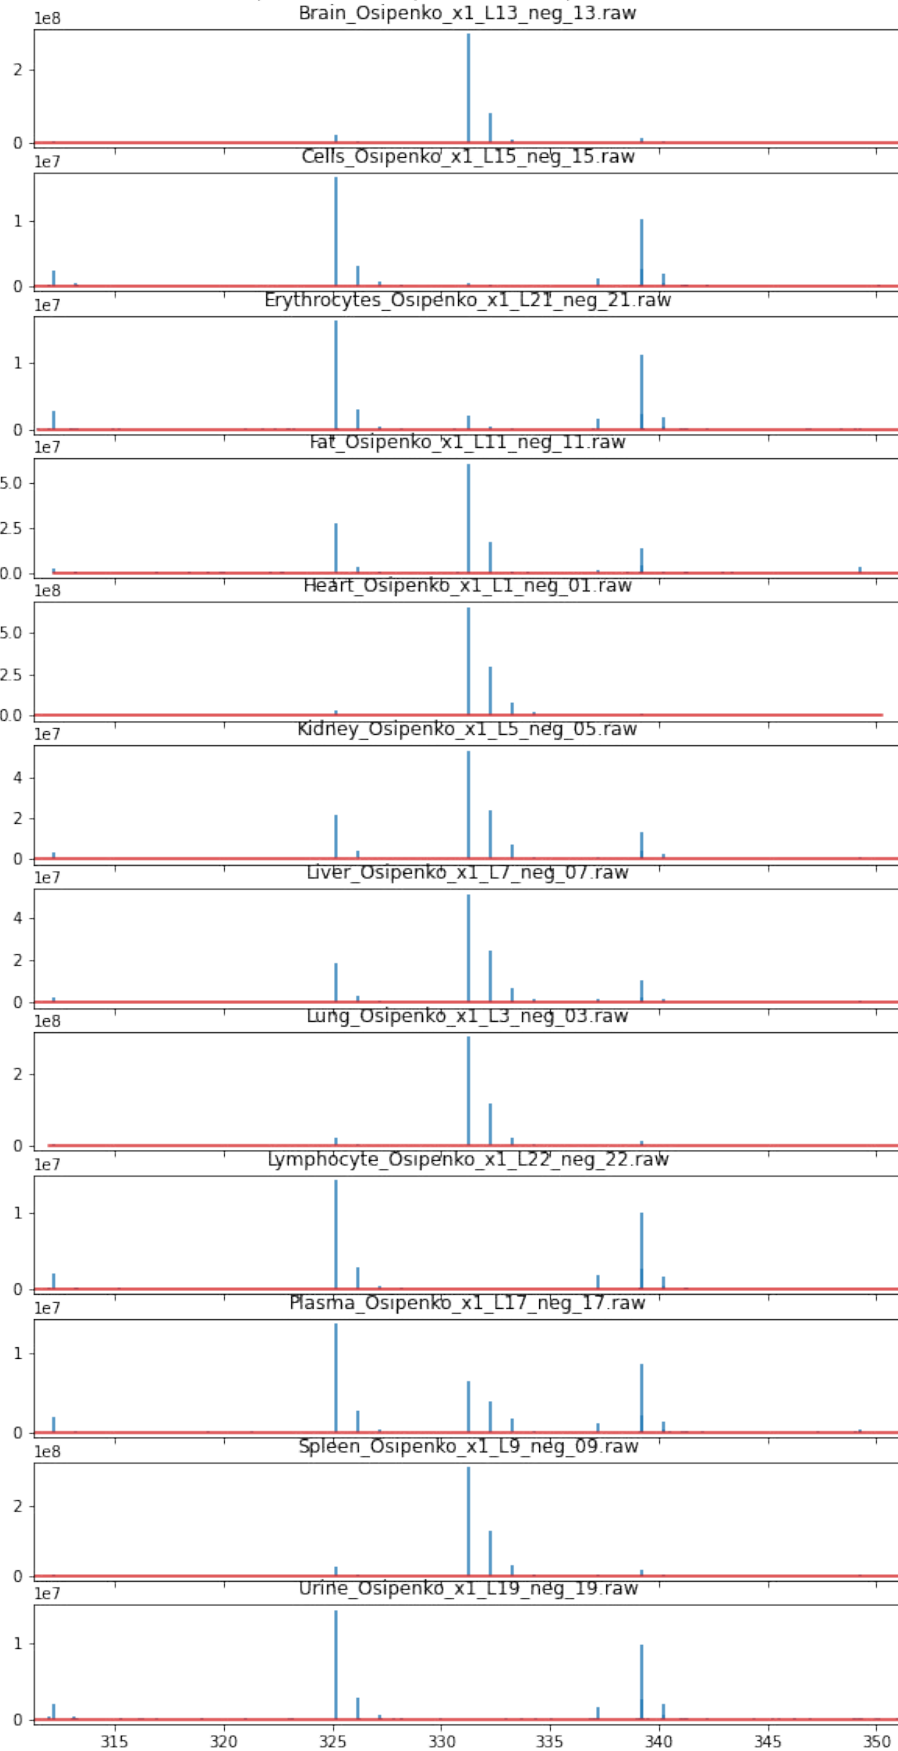

Rt=4.438 ,mz=281.24832 ,Name=FA 18:1 ,FormulaC18H34O2  
Brain\_Osipenko\_x1\_L13\_neg\_13.raw

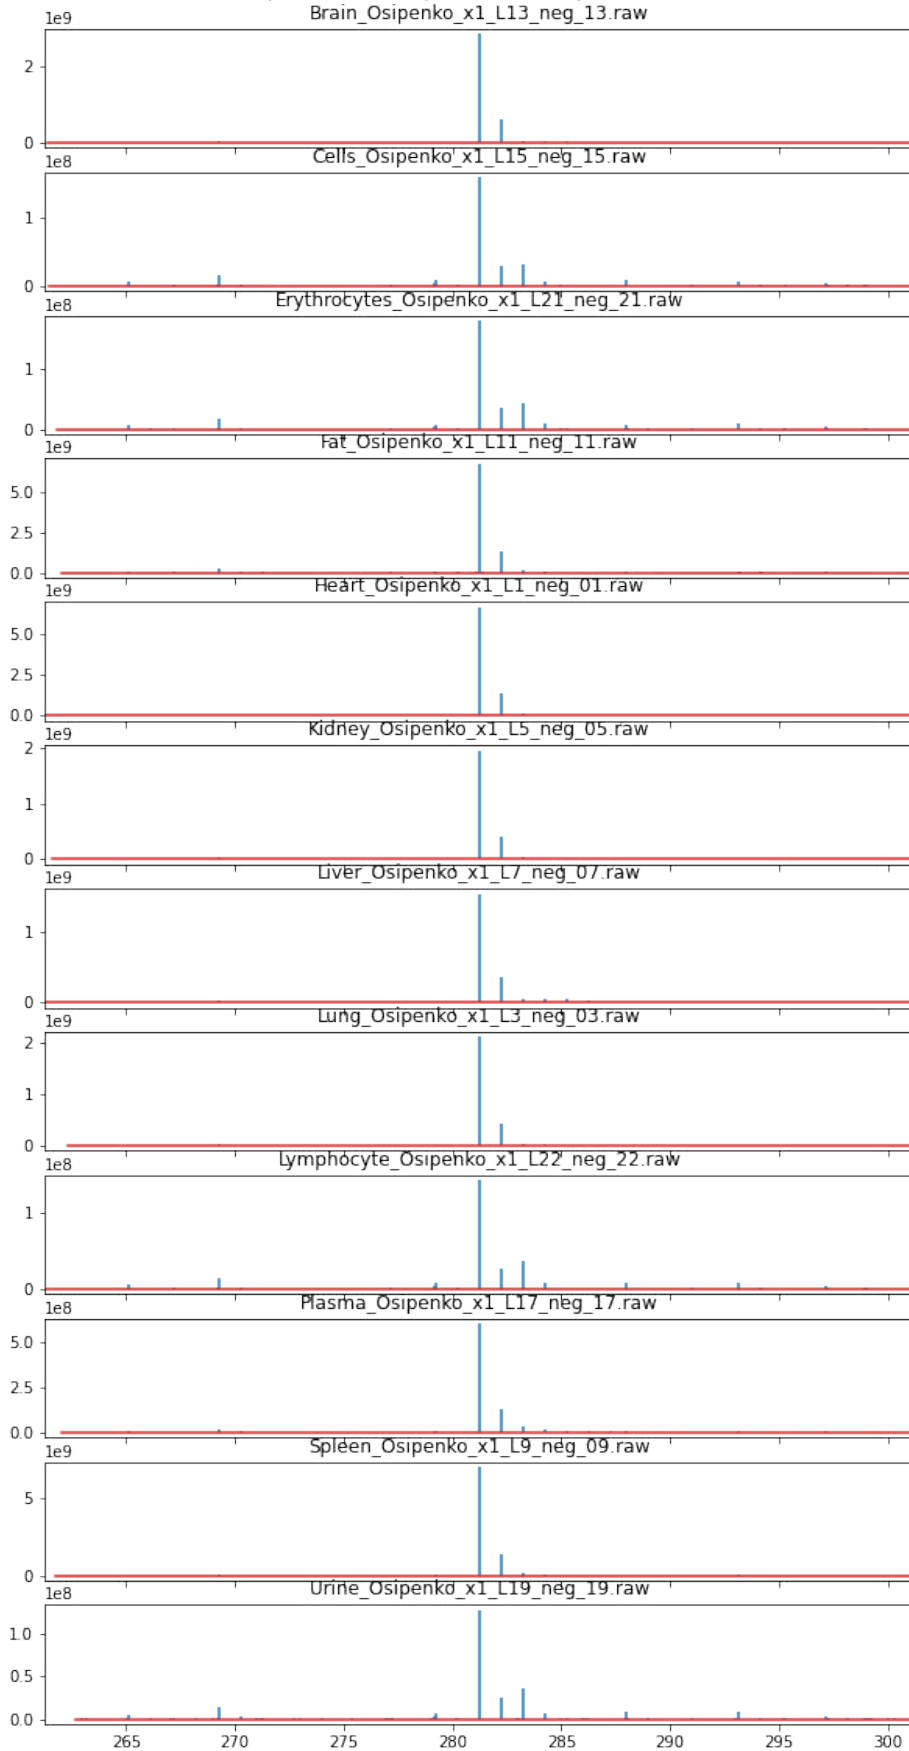

Rt=4.898 ,mz=283.2641 ,Name=FA 18:0 ,FormulaC18H36O2  
Brain\_Osipenko\_x1\_L13\_neg\_13.raw

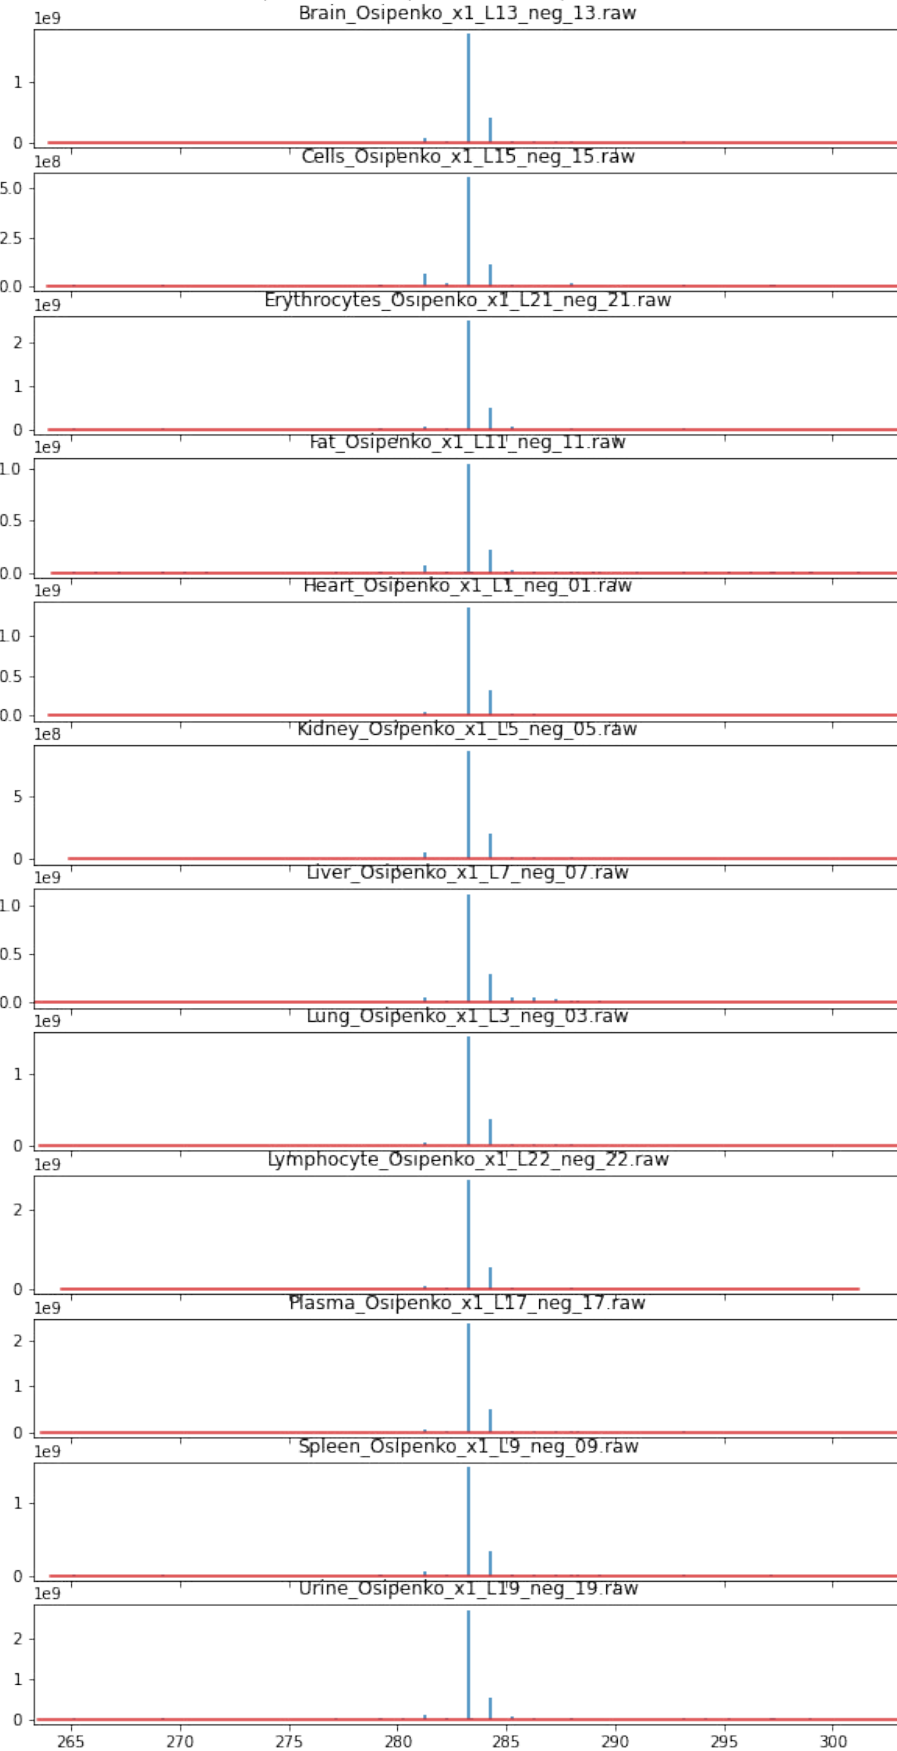

Rt=4.992 ,mz=309.27951 ,Name=FA 20:1 ,FormulaC20H38O2  
Brain\_Osipenko\_x1\_L13\_neg\_13.raw

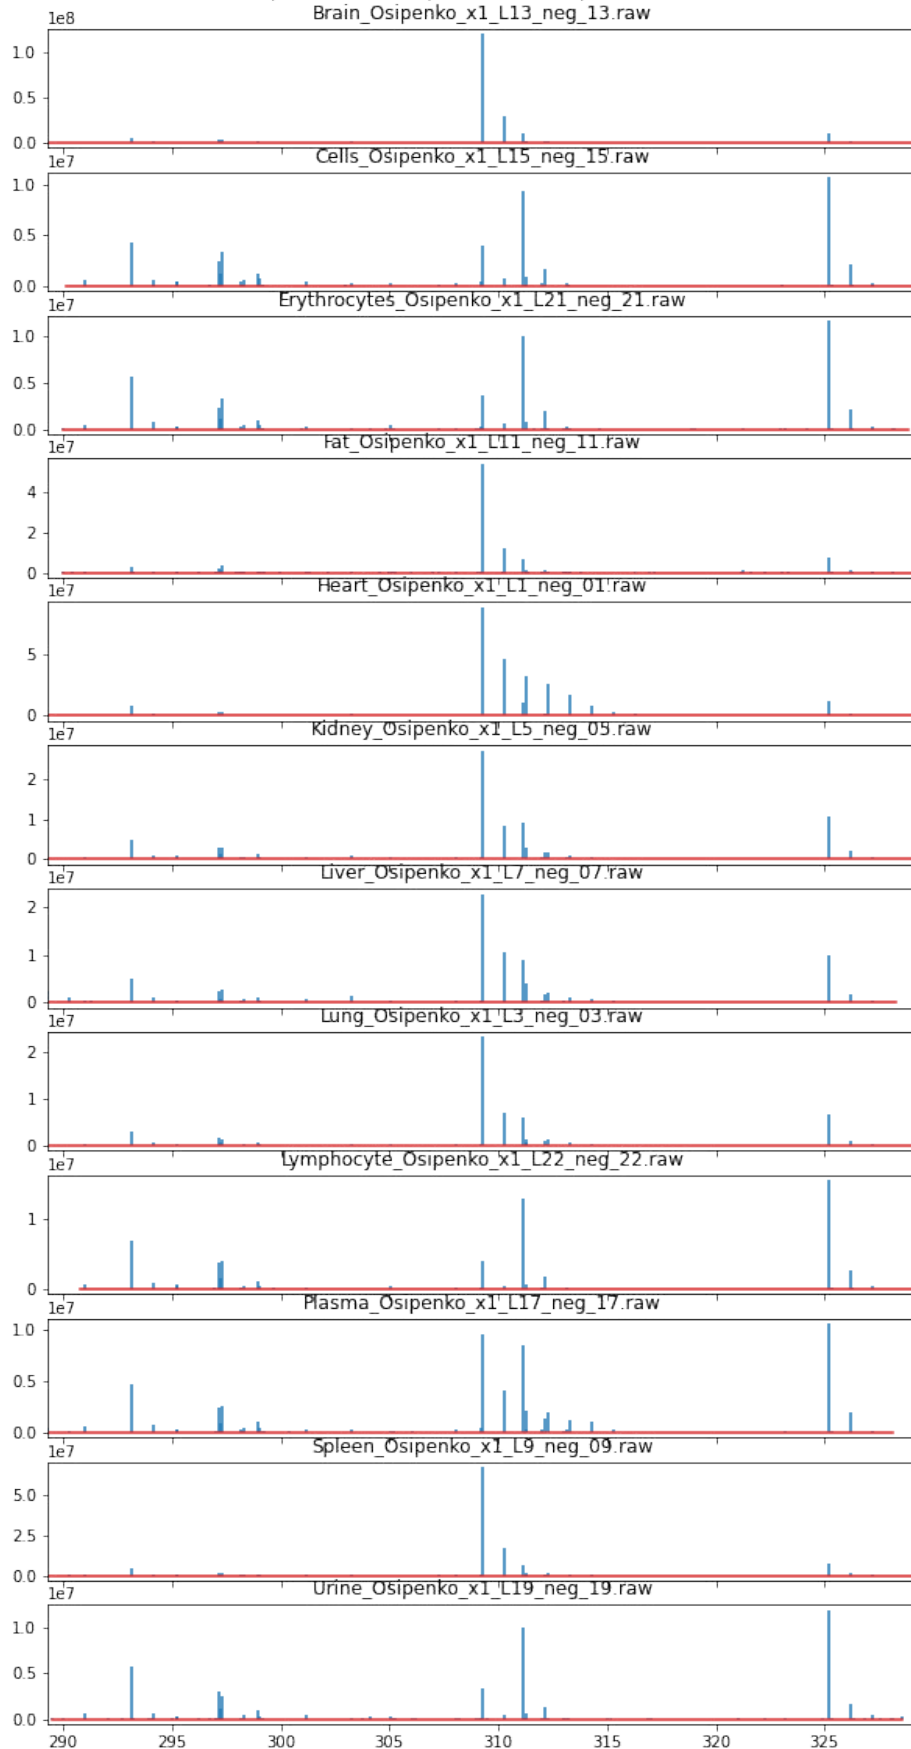



Rt=5.188 ,mz=255.23241 ,Name=FA 16:0 ,FormulaC16H32O2  
Brain\_Osipenko\_x1\_L13\_neg\_13.raw

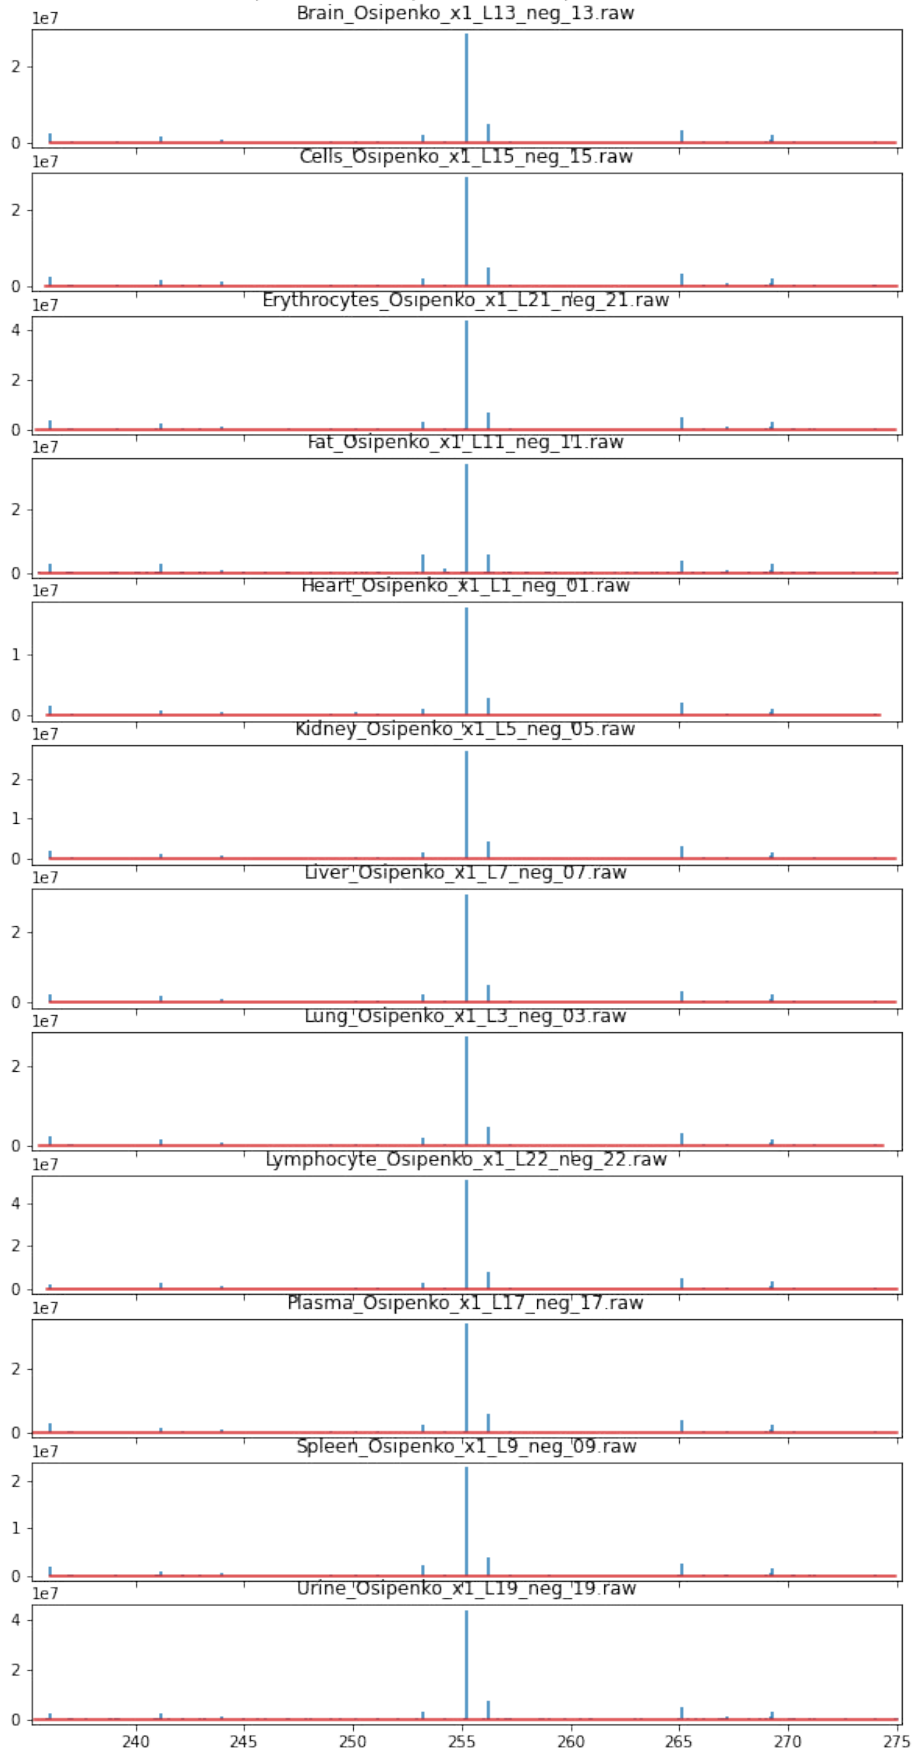

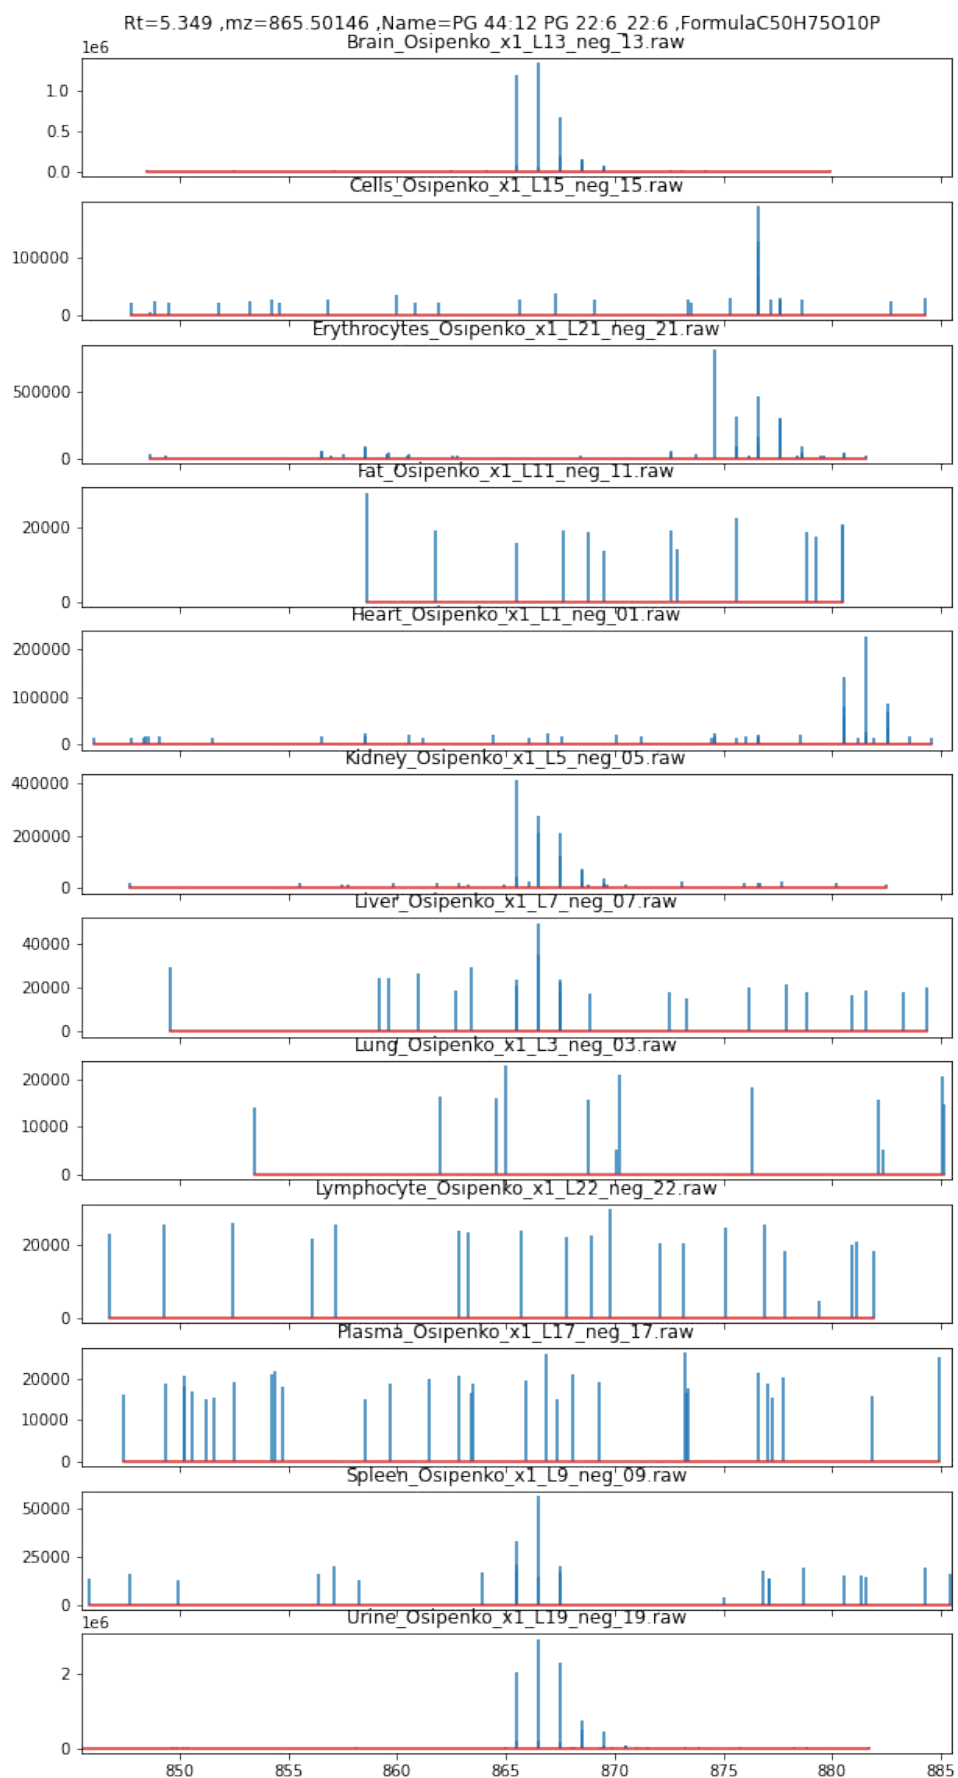

Rt=5.511 ,mz=817.50238 ,Name=PG 40:8 PG 18:2 22:6 ,FormulaC46H75O10P  
Brain\_Osipenko\_x1\_L13\_neg\_13.raw

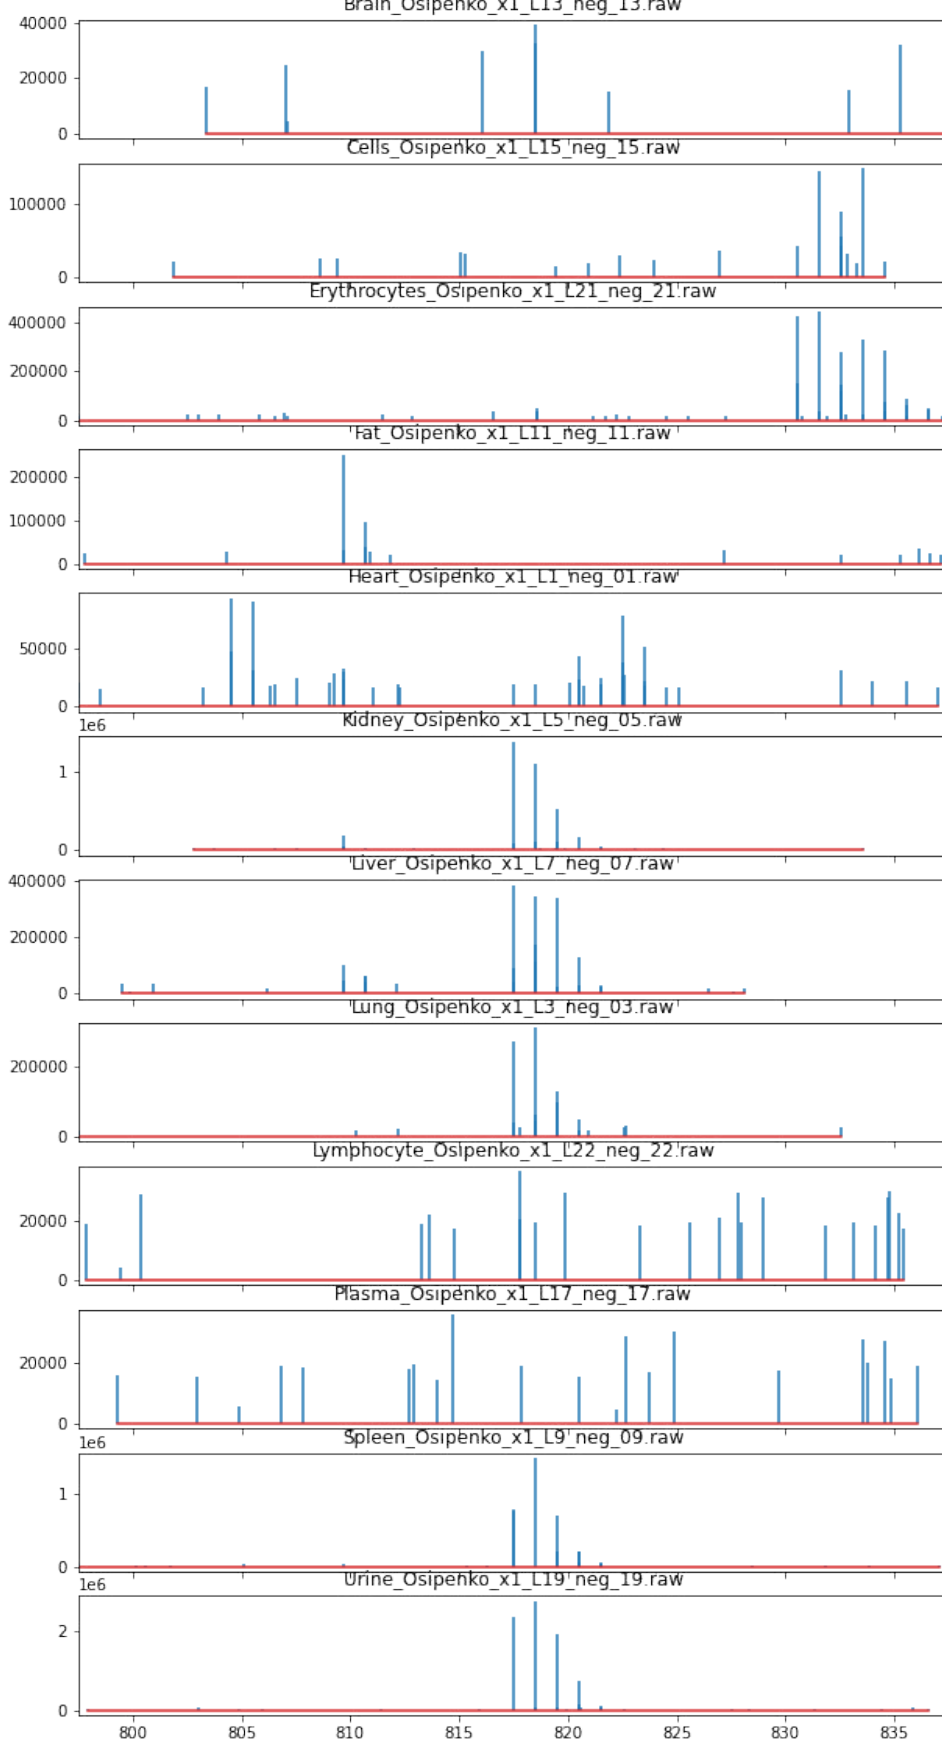

Rt=5.608 ,mz=817.50415 ,Name=PG 40:8 PG 18:2 22:6 ,FormulaC46H75O10P  
Brain\_Osipenko\_x1\_L13\_neg\_13.raw

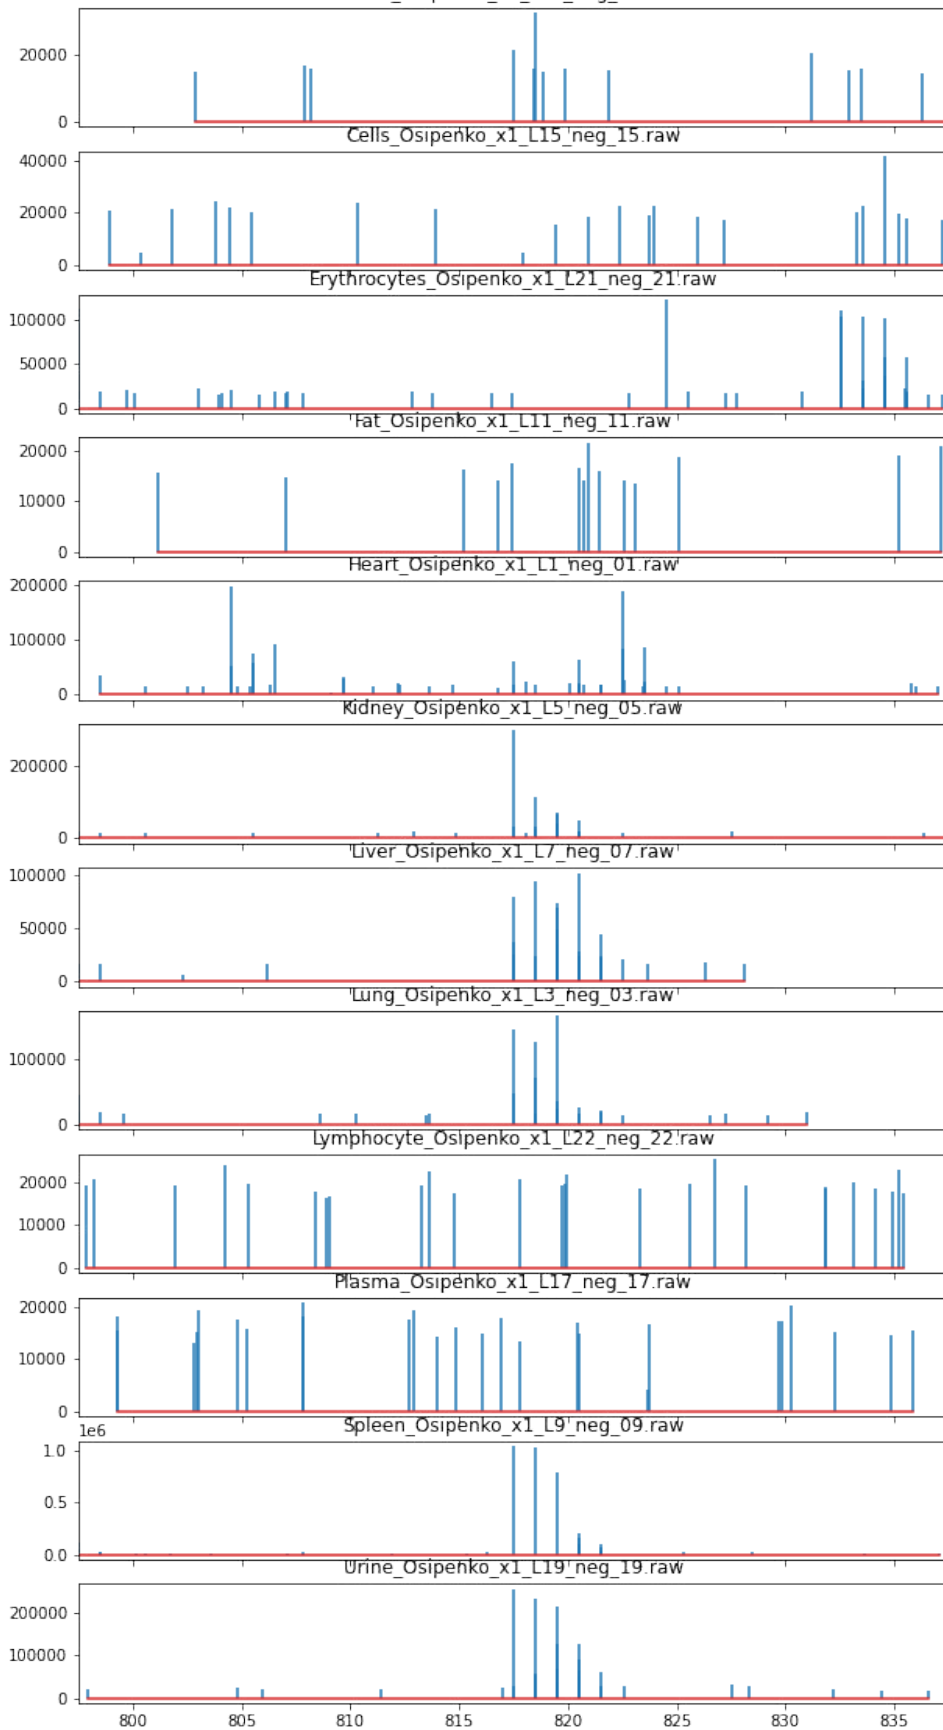

Rt=5.611 ,mz=337.31189 ,Name=FA 22:1 ,FormulaC22H42O2  
Brain\_Osipenko\_x1\_L13\_neg\_13.raw

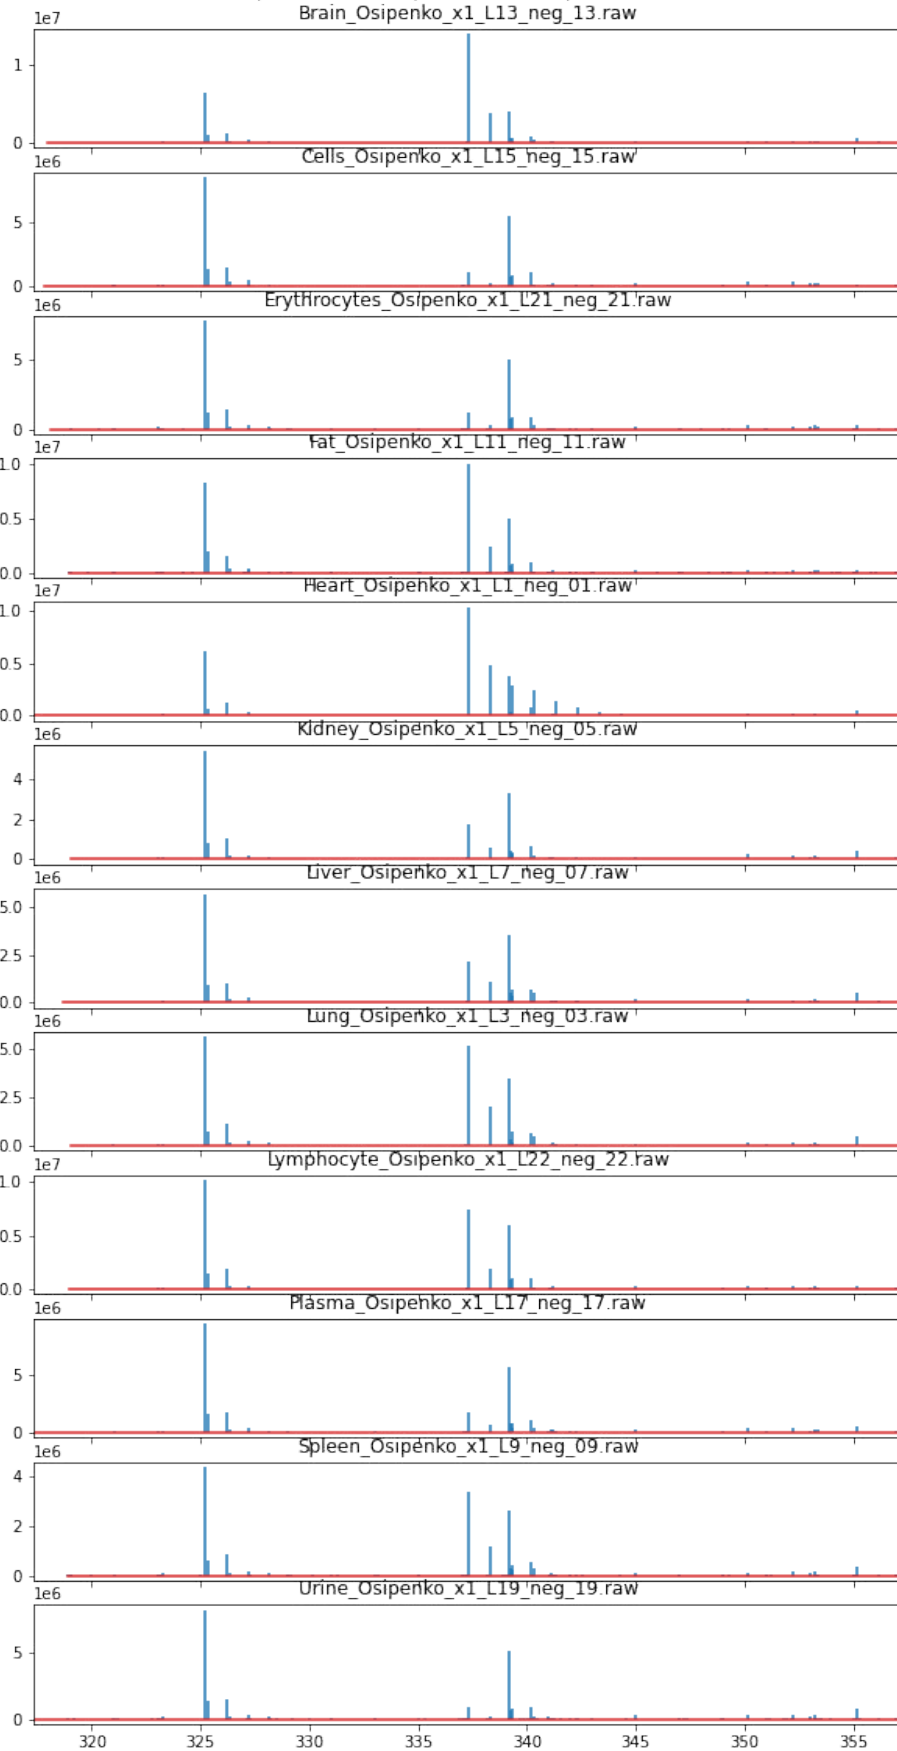

Rt=5.651 ,mz=793.50104 ,Name=PG 38:6 PG 18:2 20:4 ,FormulaC44H75O10P  
Brain\_Osipenko\_x1\_L13\_neg\_13.raw

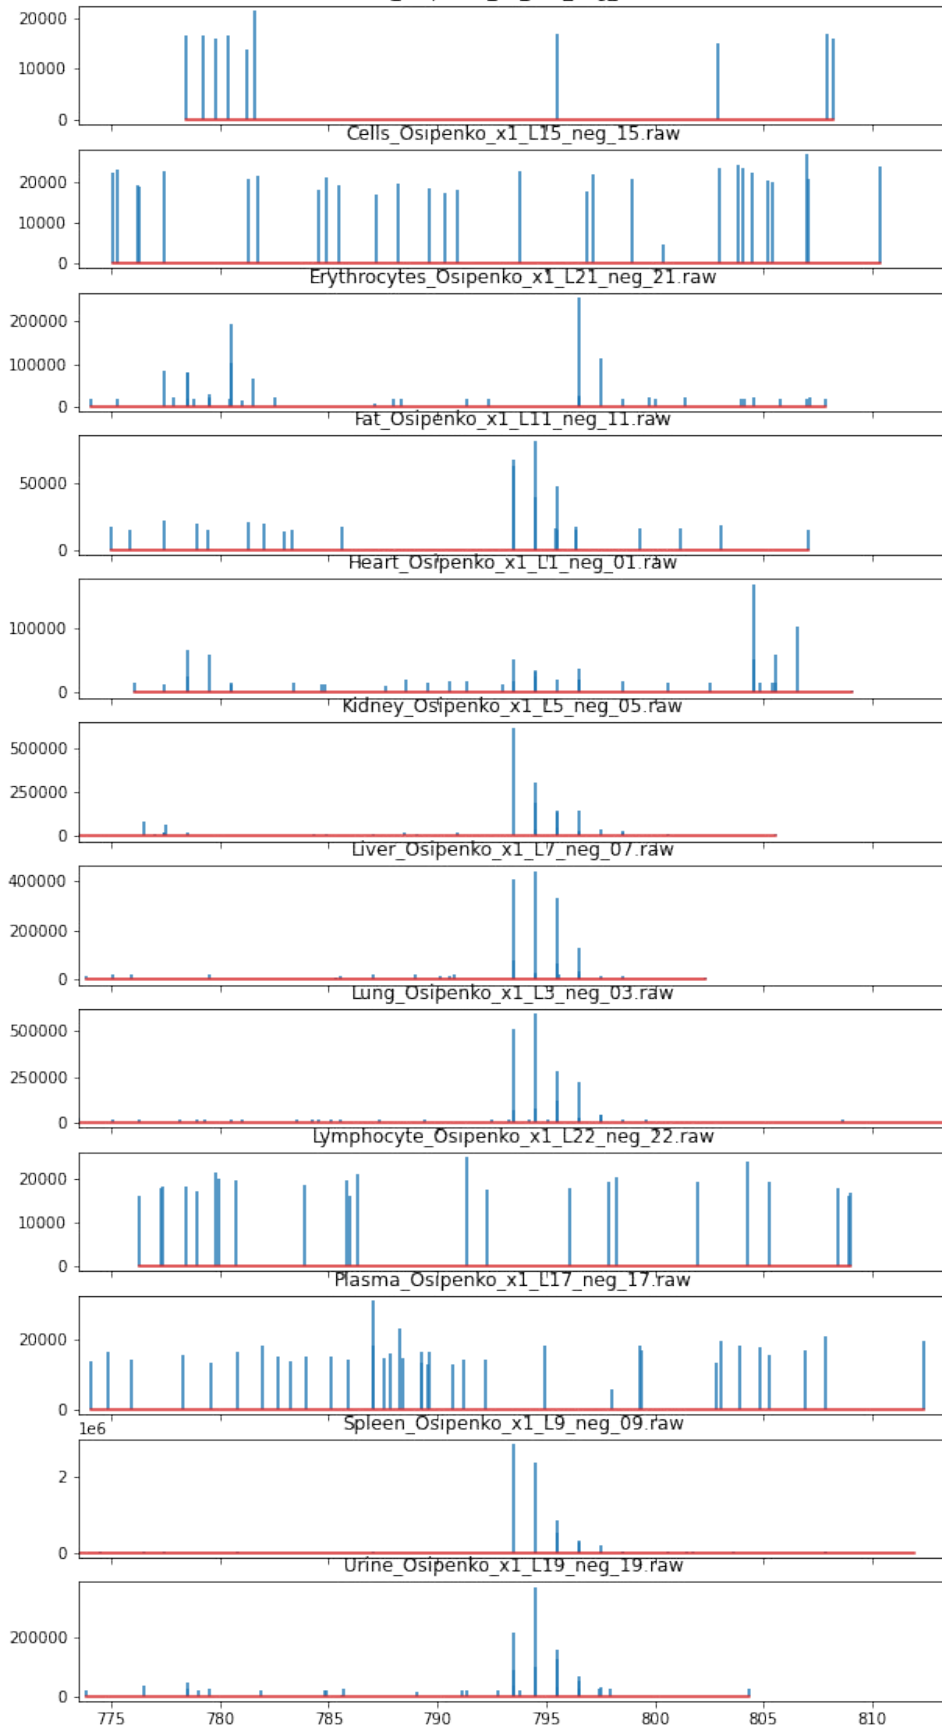

Rt=5.671 ,mz=769.50104 ,Name=PG 36:4 PG 18:2 18:2 ,FormulaC42H75O10P  
Brain\_Osipenko\_x1\_L13\_neg\_13.raw

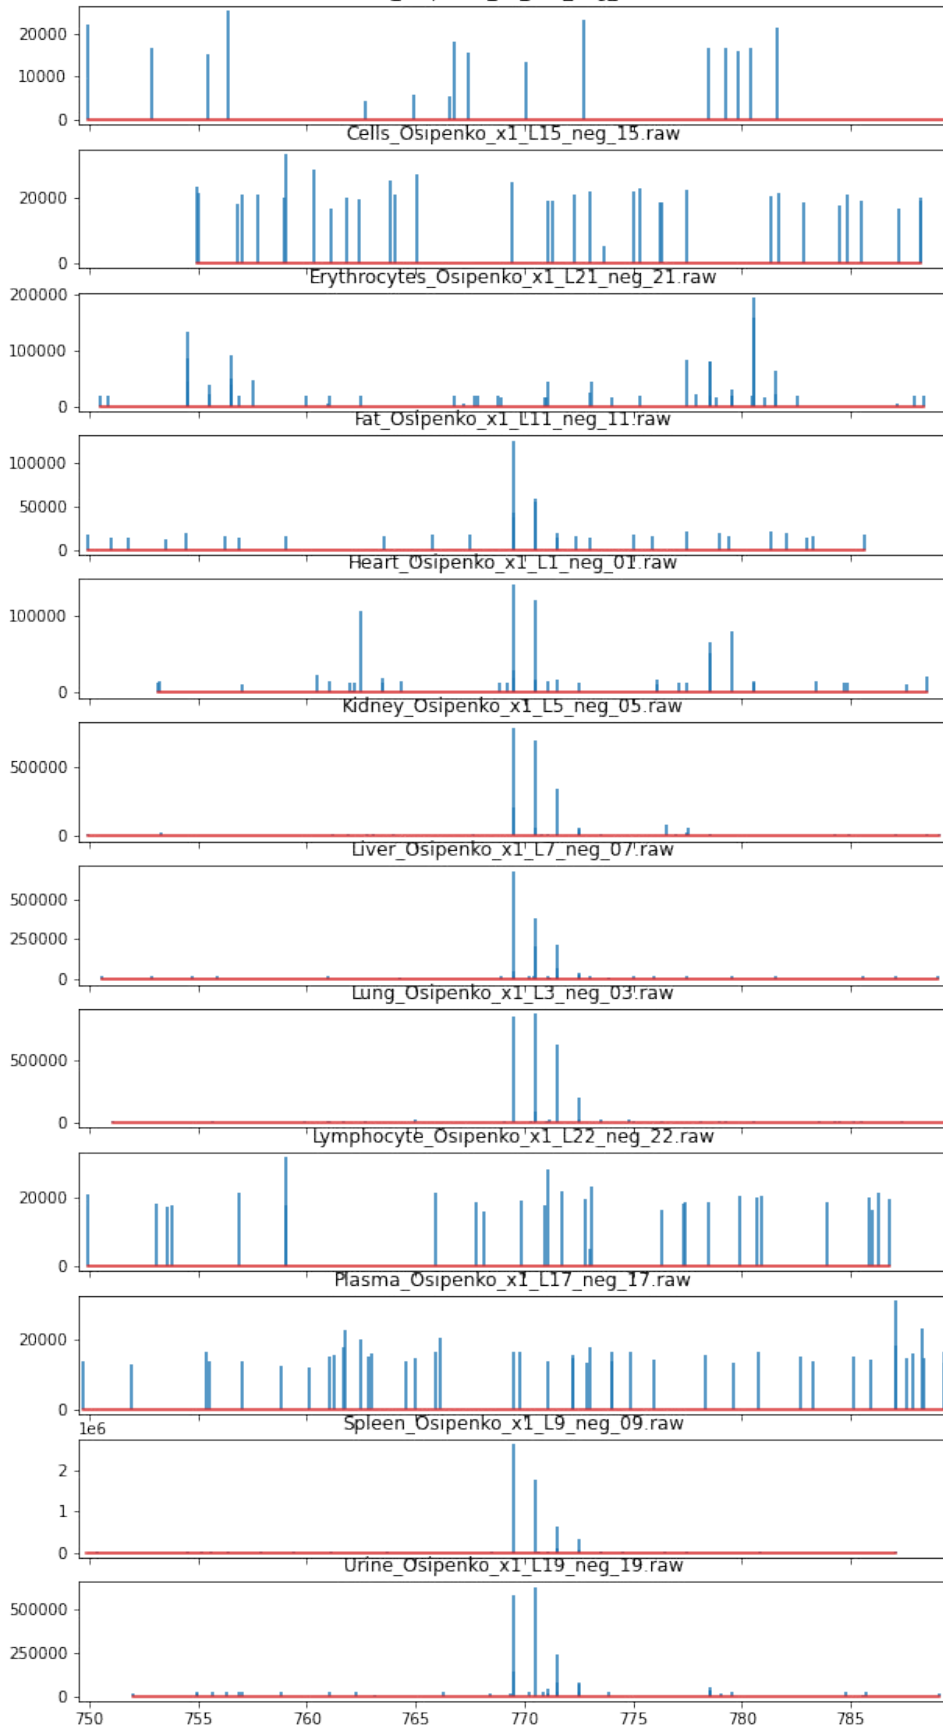

Rt=5.714 ,mz=867.51556 ,Name=PG 44:11 PG 22:5 22:6 ,FormulaC50H77O10P  
Brain\_Osipenko\_x1\_L13\_neg\_13.raw

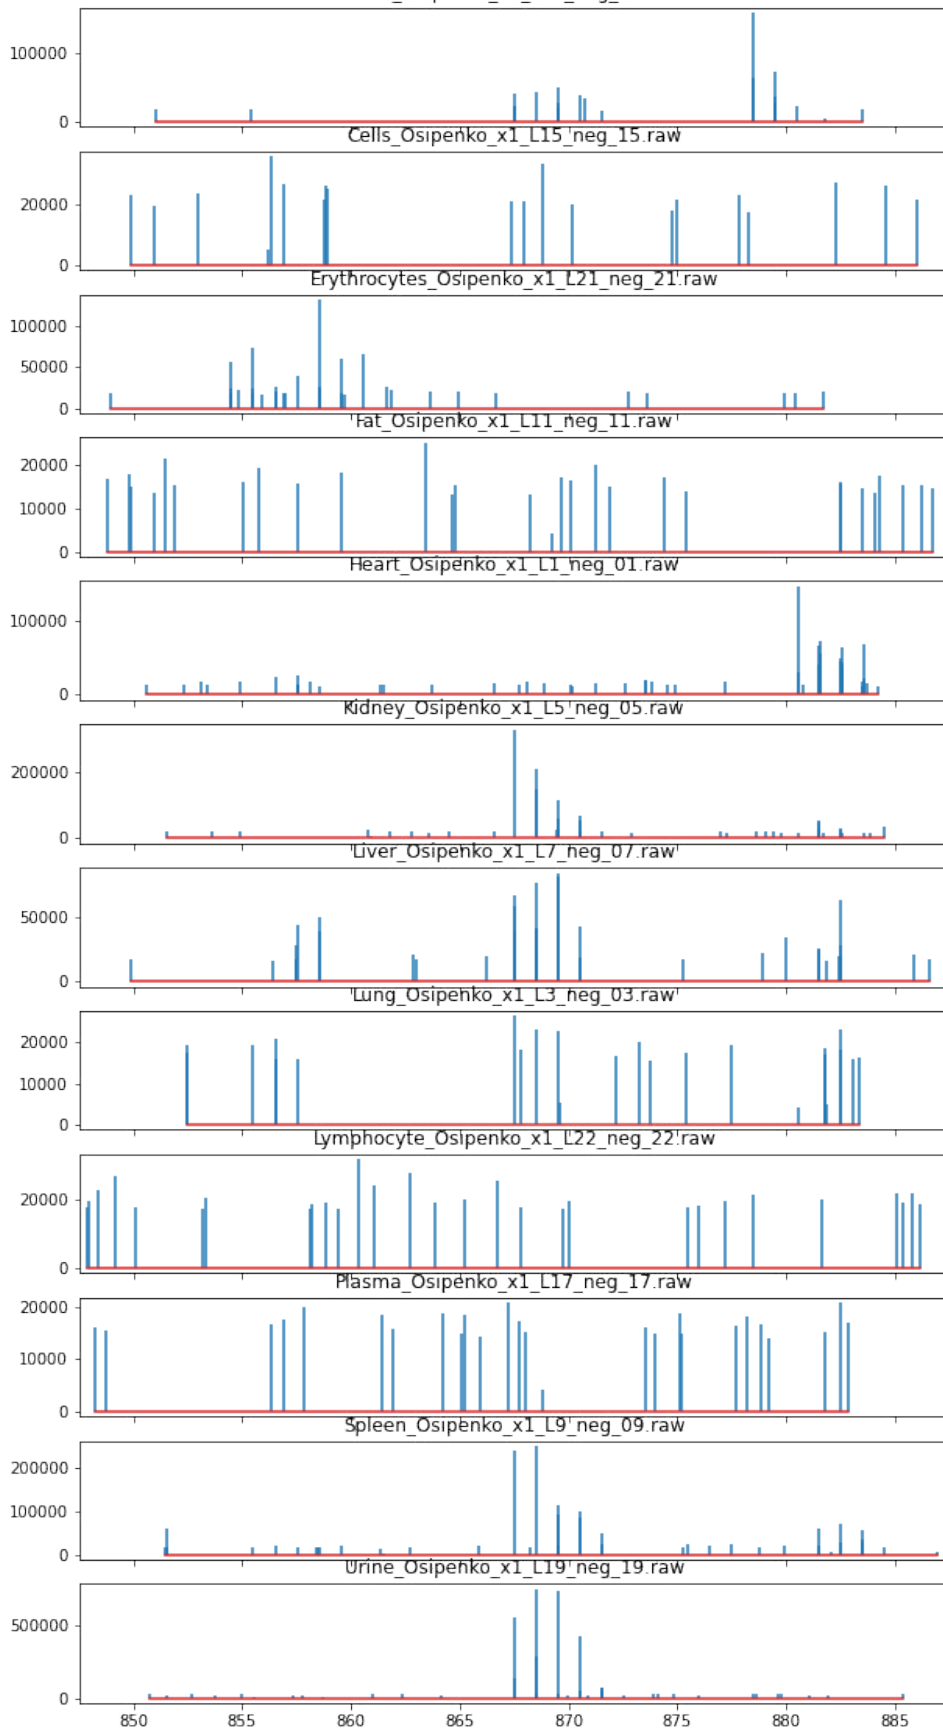



Rt=5.823 ,mz=881.51996 ,Name=PI 38:6 PI 18:2 20:4 ,FormulaC47H79O13P  
Brain\_Osipenko\_x1\_L13\_neg\_13.raw

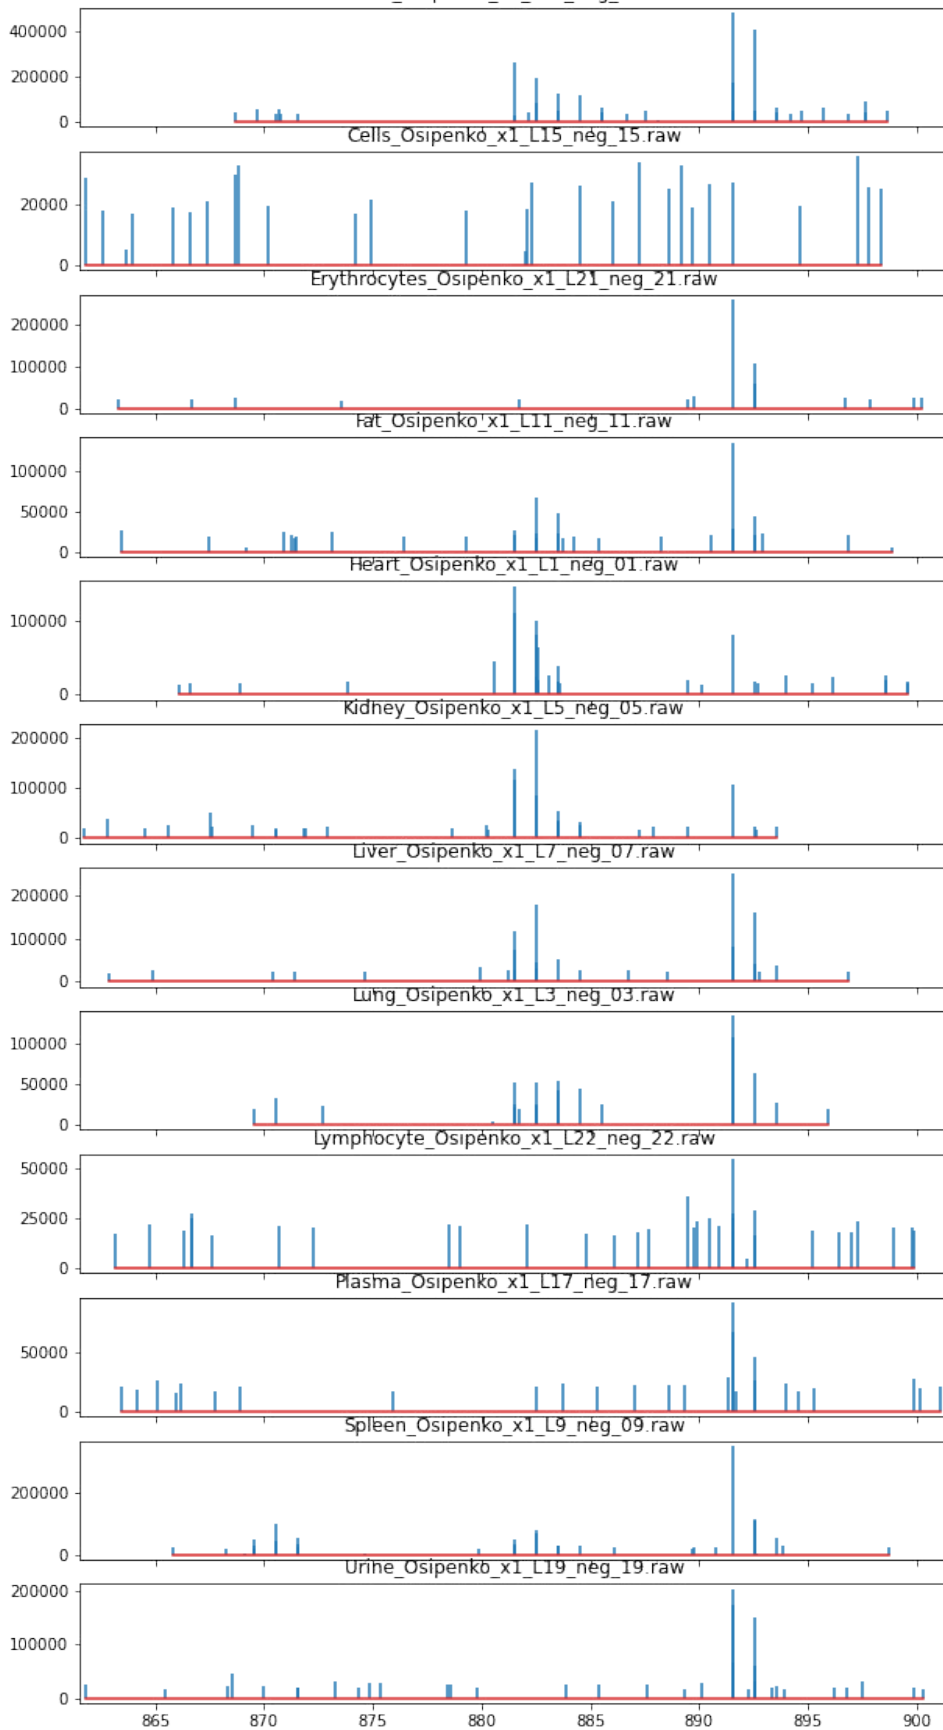

Rt=5.955 ,mz=819.51978 ,Name=PG 40:7 PG 18:2 22:5 ,FormulaC46H77O10P  
Brain\_Osipenko\_x1\_L13\_neg\_13.raw

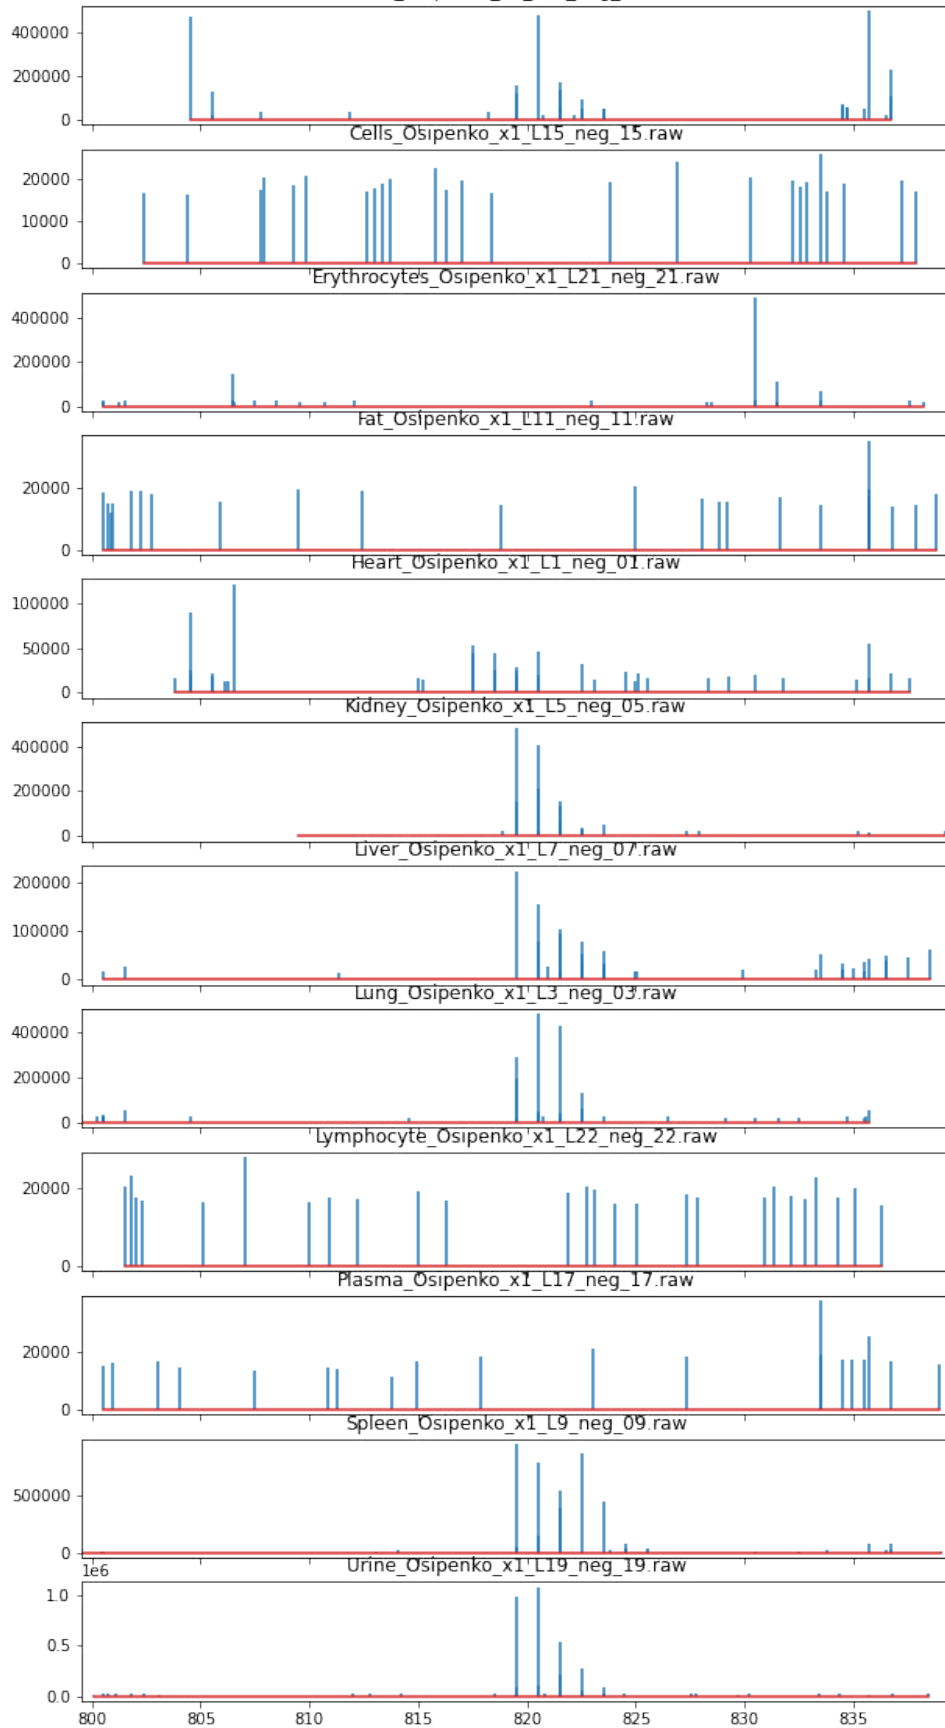

Rt=6.5 ,mz=745.50061 ,Name=PG 34:2 PG 16:0\_18:2 ,FormulaC40H75O10P  
Brain\_Osipenko\_x1\_L13\_neg\_13.raw

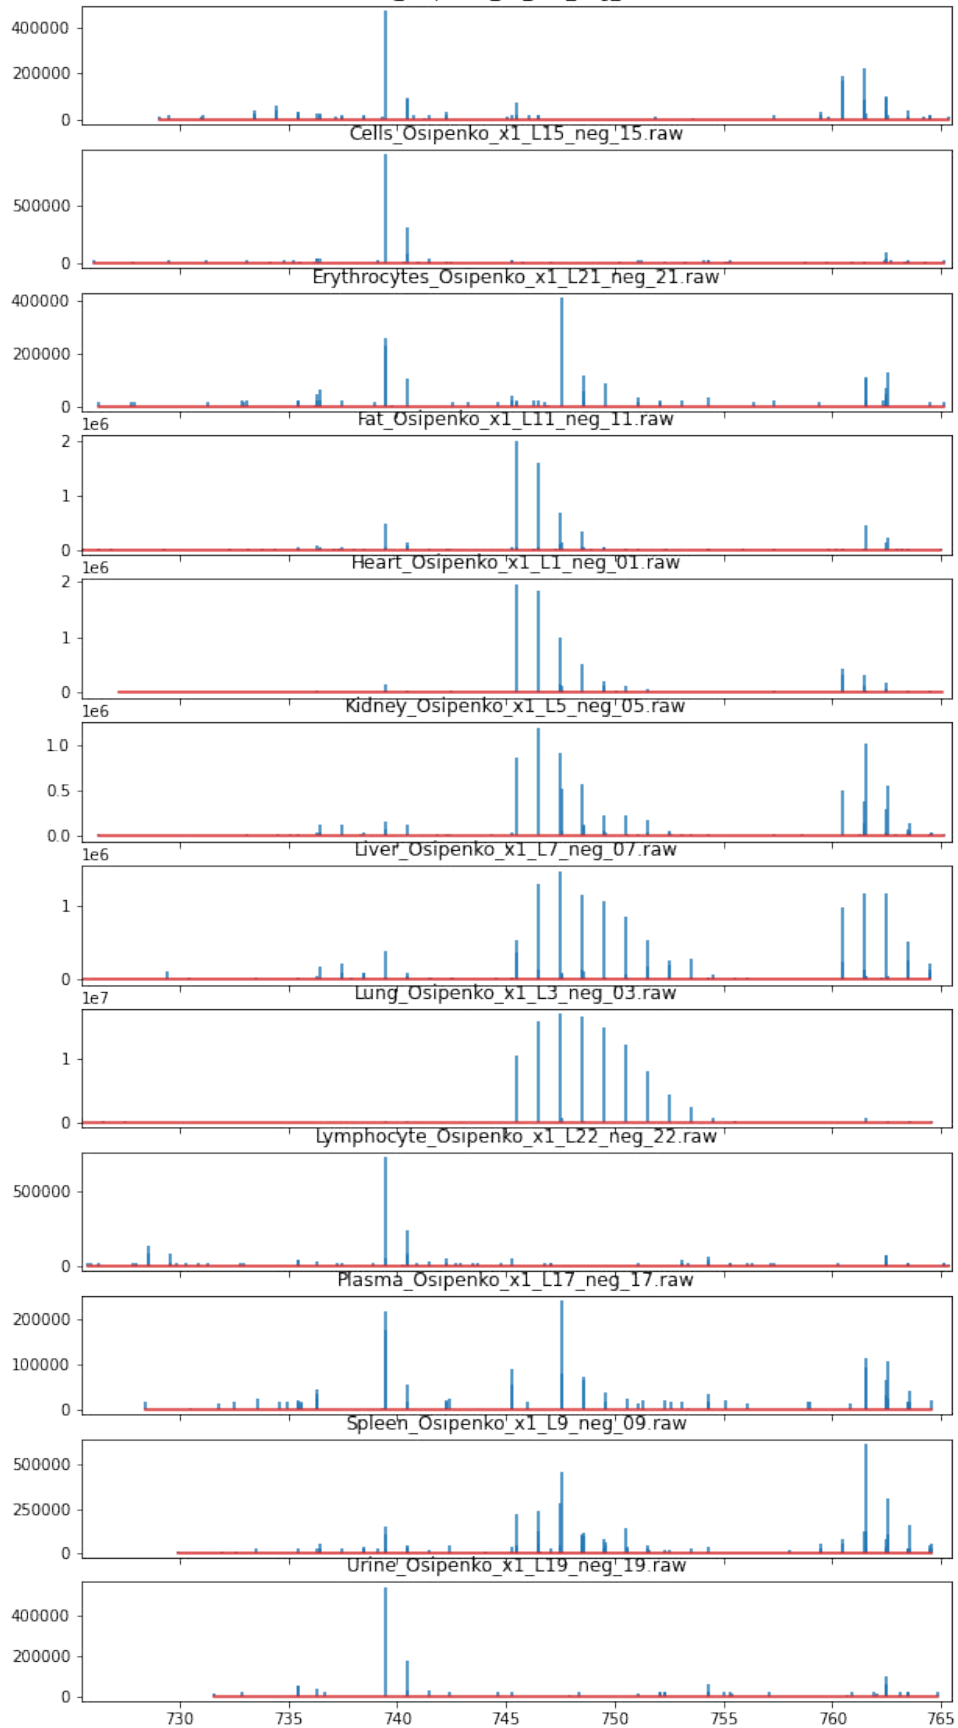

Rt=6.011 ,mz=793.50055 ,Name=PG 38:6 PG 18:2 20:4 ,FormulaC44H75O10P  
Brain\_Osipenko\_x1\_L13\_neg\_13.raw

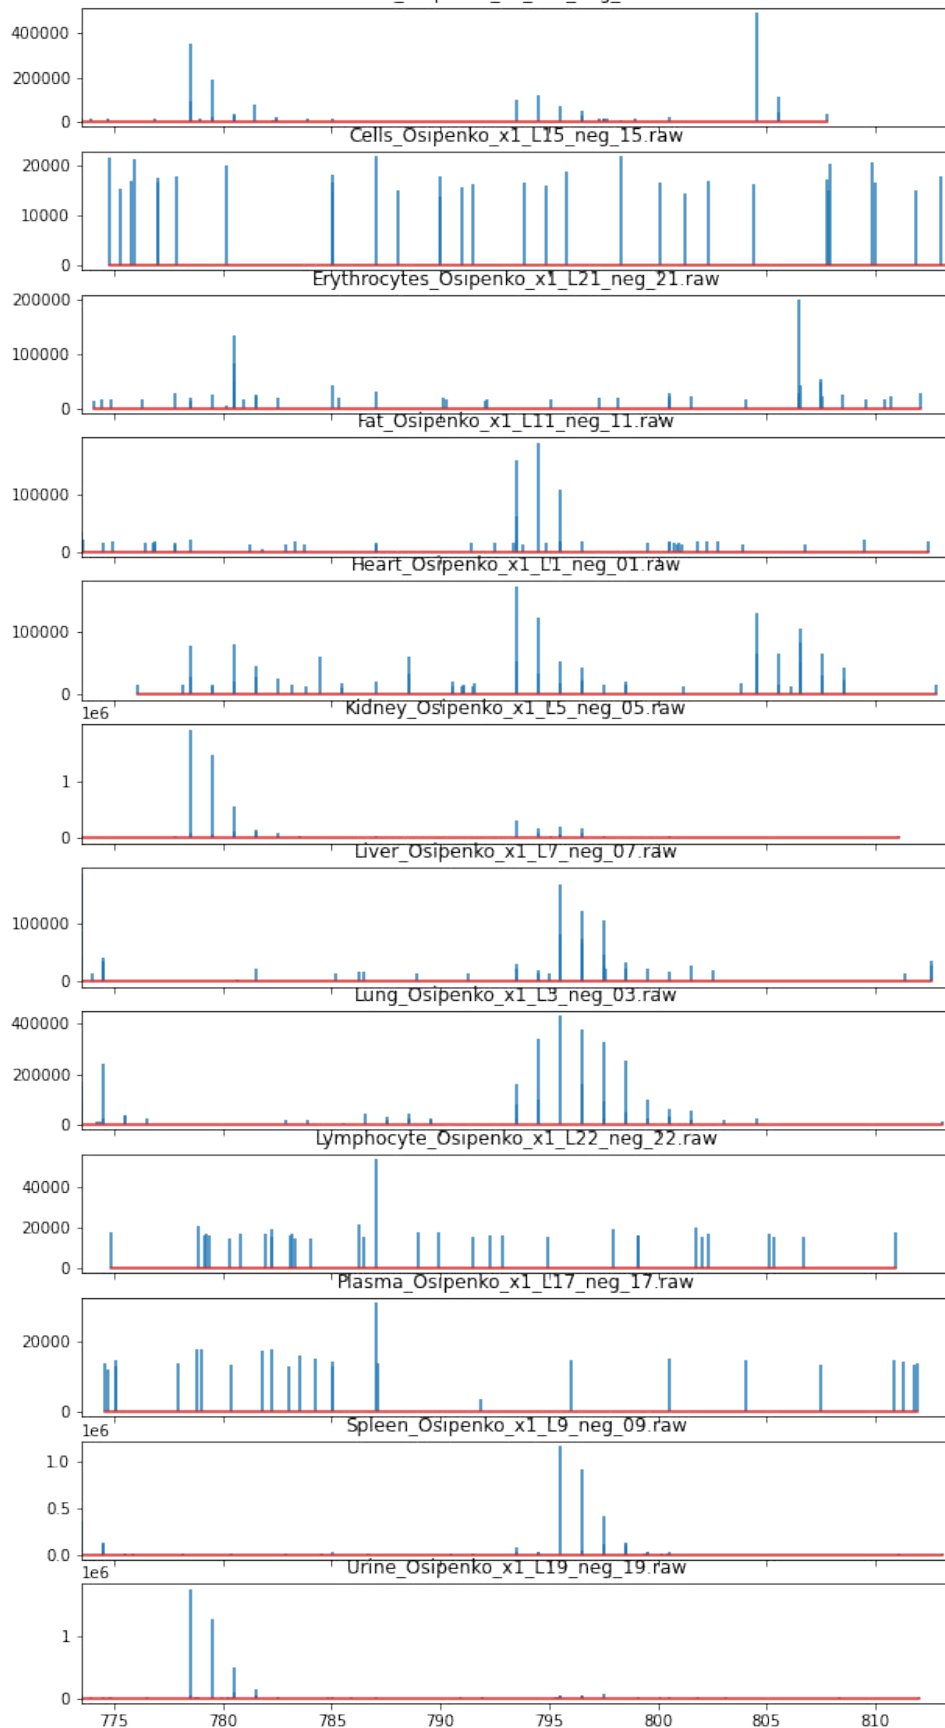

Rt=6.027 ,mz=233.15457 ,Name=FA 15:4 ,FormulaC15H22O2  
Brain\_Osipenko\_x1\_L13\_neg\_13.raw

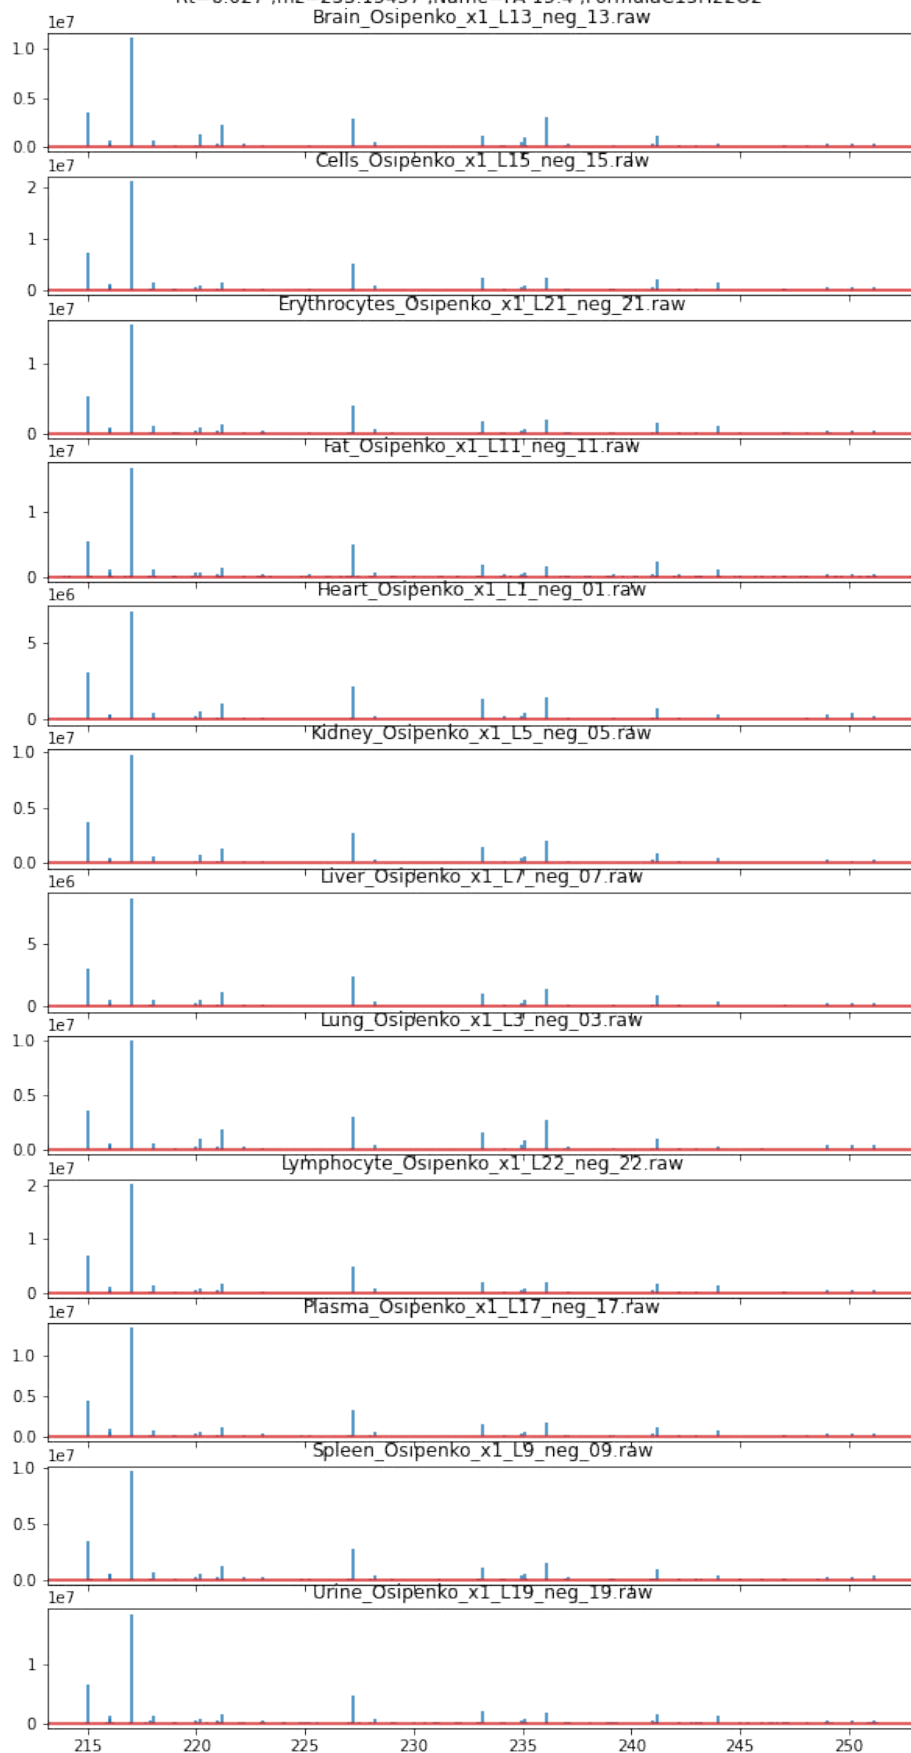

Rt=6.45 ,mz=769.50055 ,Name=PG 36:4 PG 16:0\_20:4 ,FormulaC42H75O10P  
Brain\_Osipenko\_x1\_L13\_neg\_13.raw

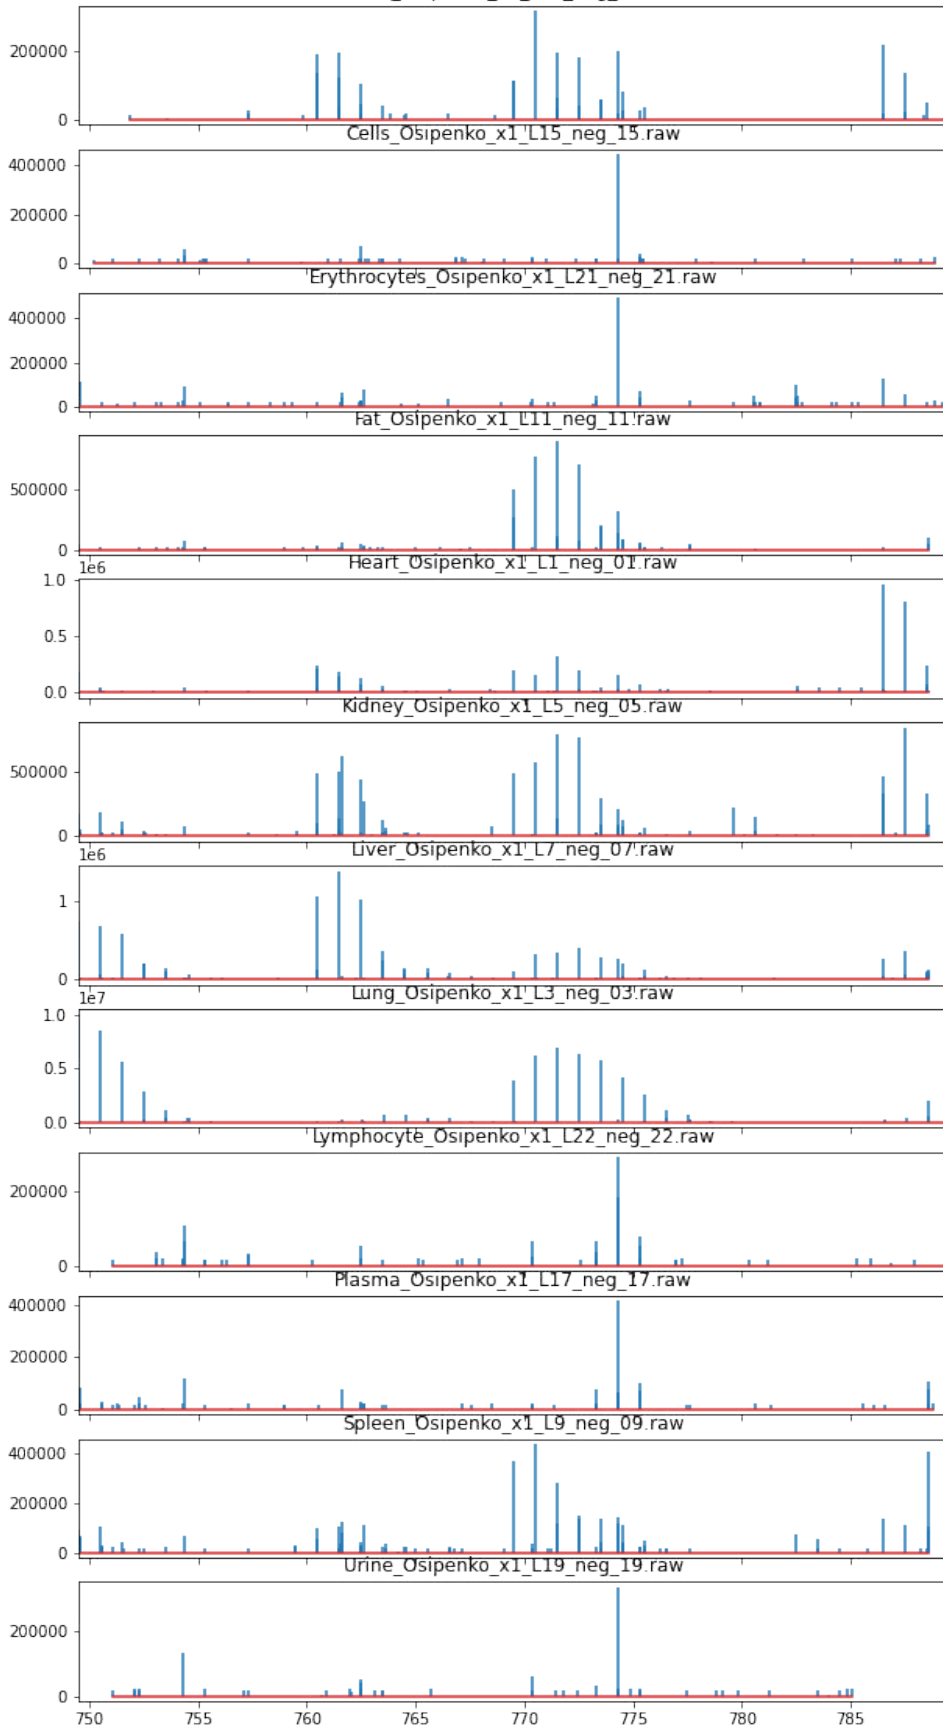

Rt=6.046 ,mz=857.52148 ,Name=PI 36:4 PI 16:0 20:4 ,FormulaC45H79O13P  
Brain\_Osipenko\_x1\_L13\_neg\_13.raw

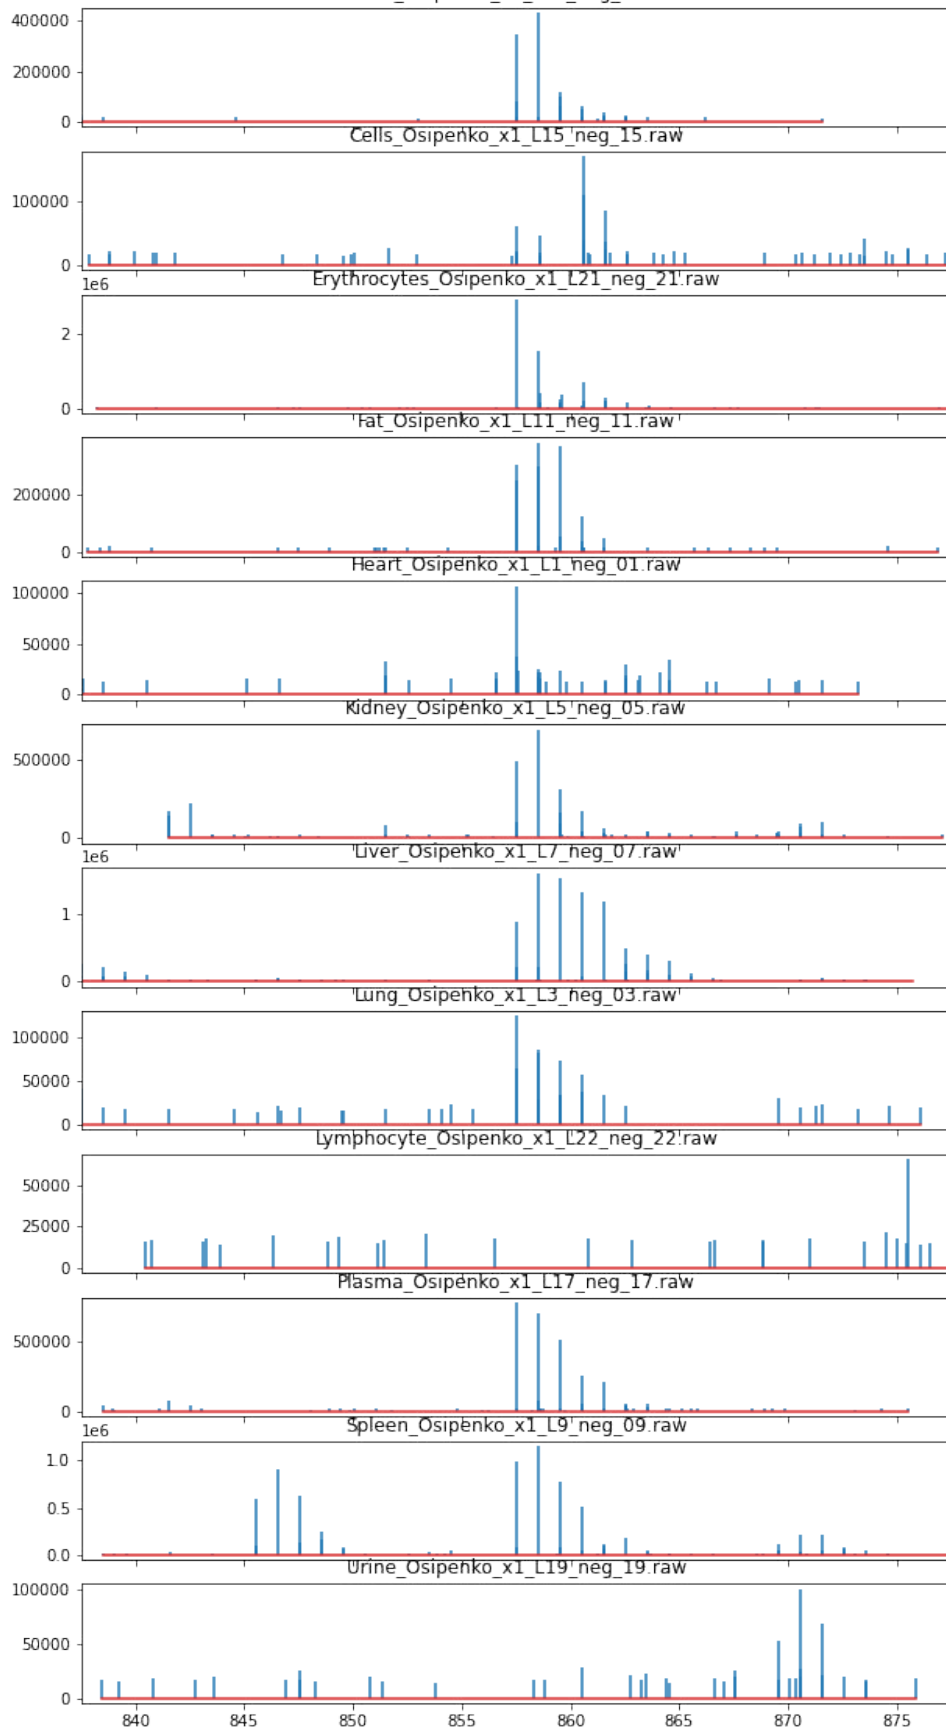

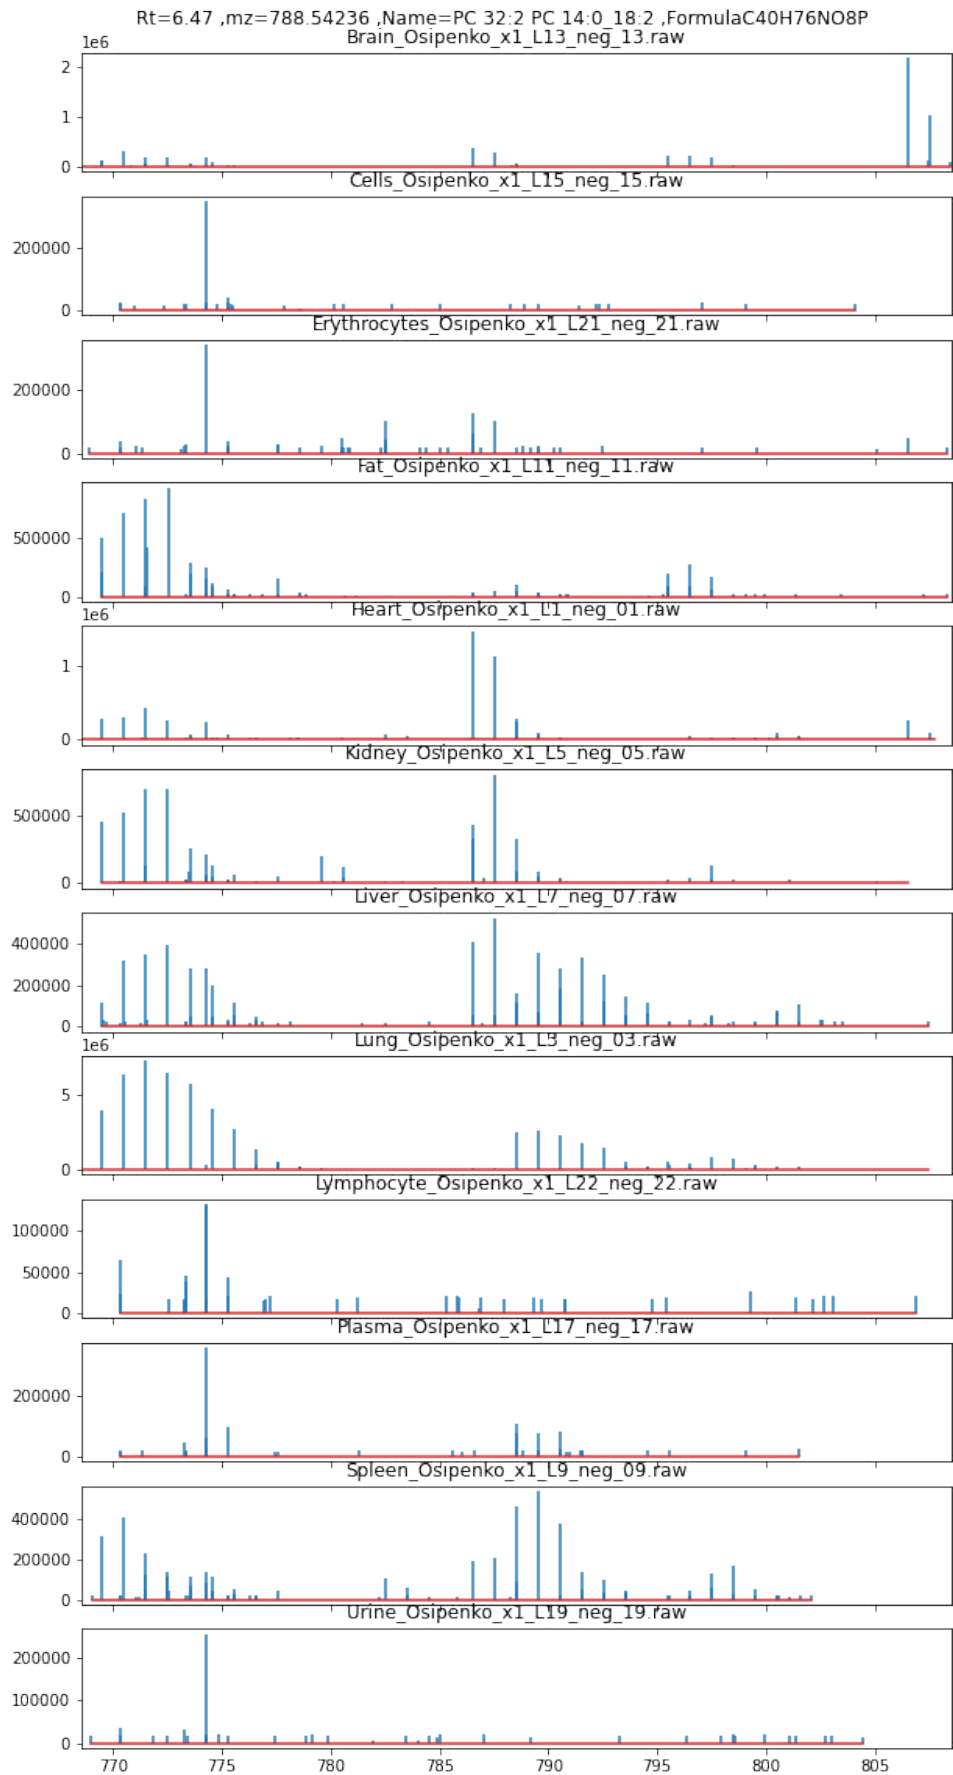



Rt=6.057 ,mz=769.50018 ,Name=PG 36:4 PG 18:2 18:2 ,FormulaC42H75O10P  
Brain\_Osipenko\_x1\_L13\_neg\_13.raw

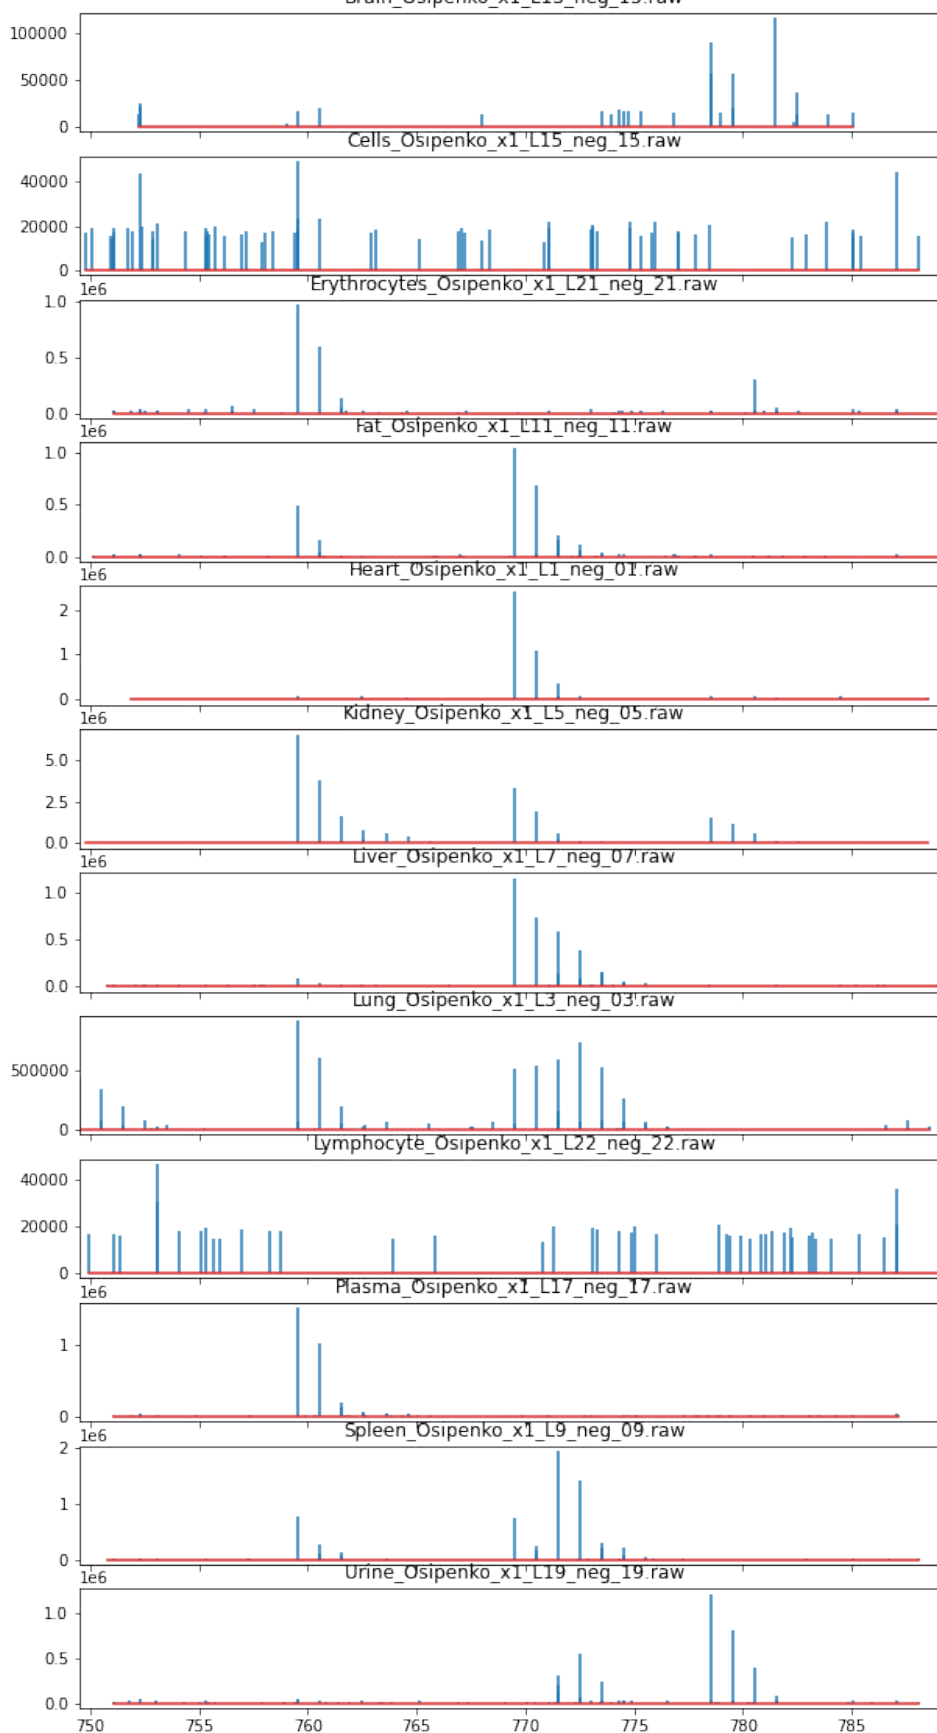

Rt=6.063 ,mz=745.5011 ,Name=PG 34:2 PG 16:0 18:2 ,FormulaC40H75O10P  
Brain\_Osipenko\_x1\_L13\_neg\_13.raw

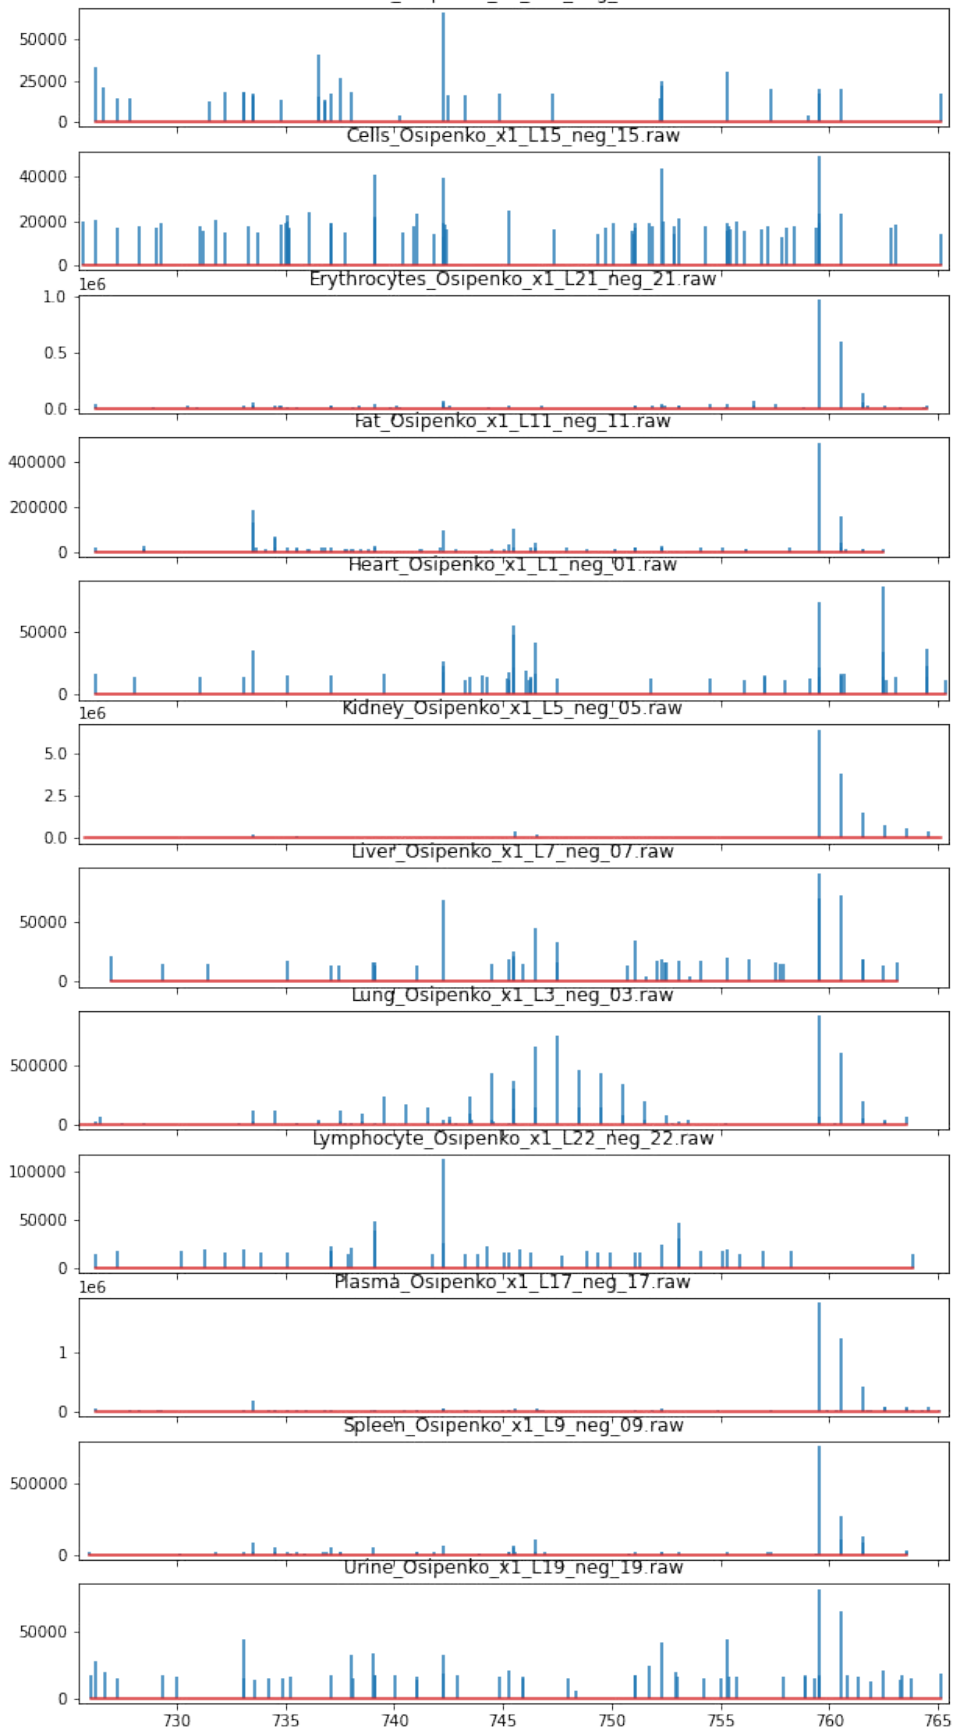

Rt=6.79 ,mz=786.50964 ,Name=PE 40:8 PE 20:4 20:4 ,FormulaC45H74NO8P  
Brain\_Osipenko\_x1\_L13\_neg\_13.raw

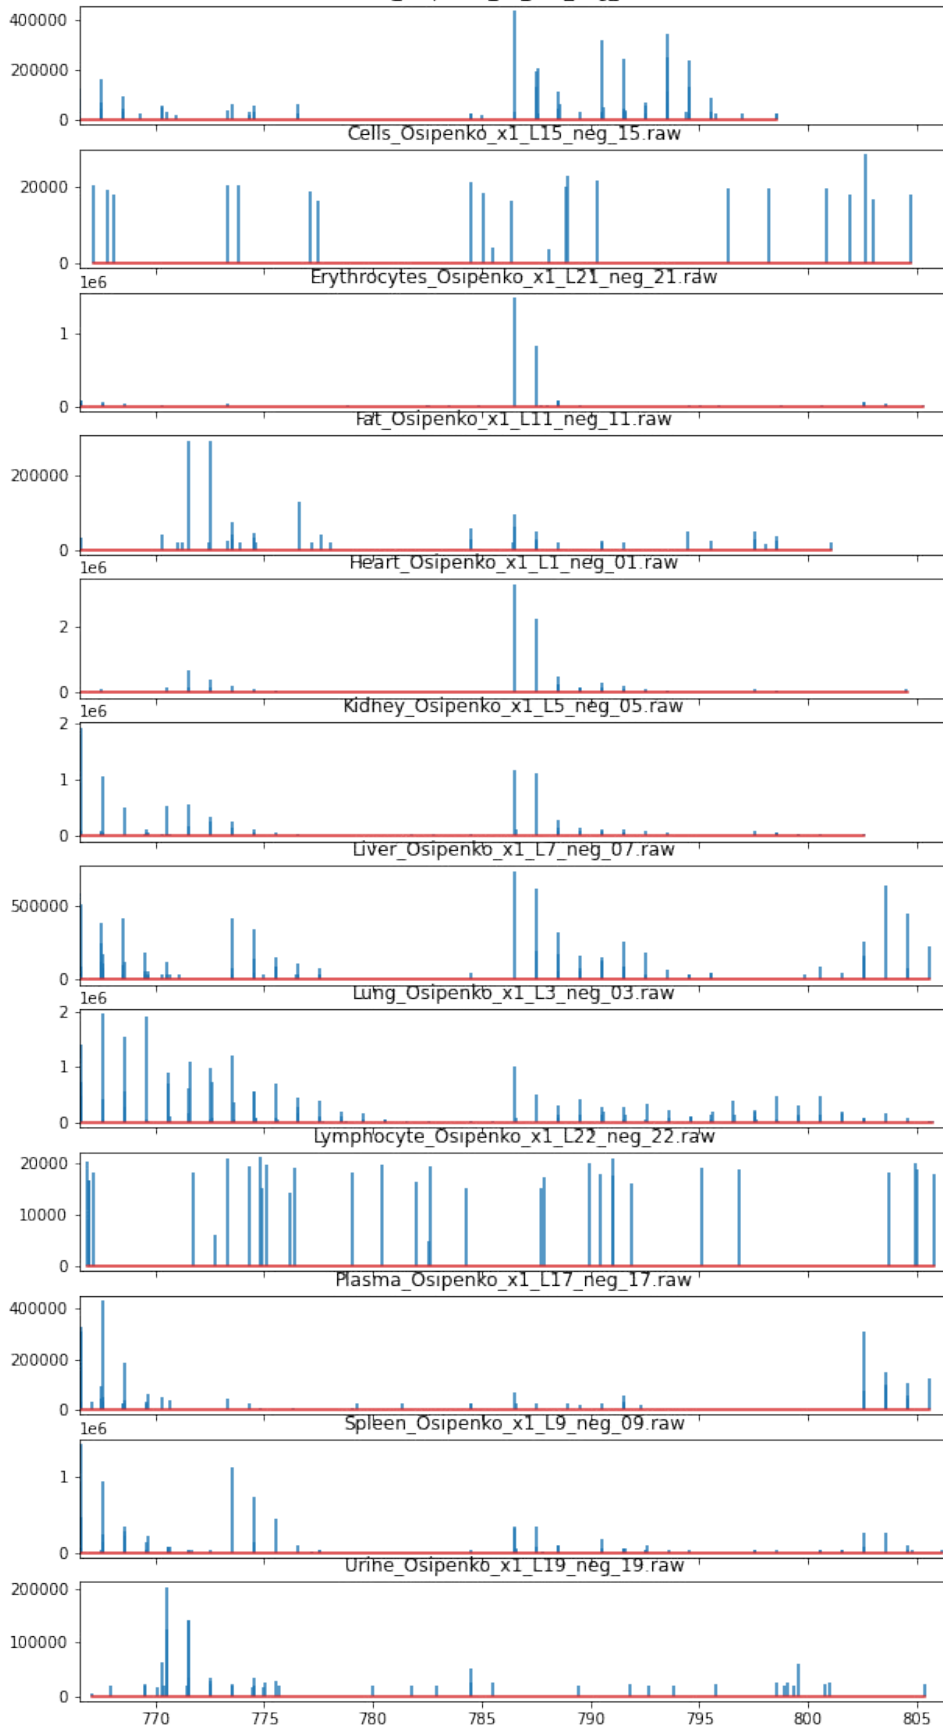

Rt=6.81 ,mz=712.4931 ,Name=PE 34:3 PE 16:1 18:2 ,FormulaC39H72NO8P  
Brain\_Osipenko\_x1\_L13\_neg\_13.raw

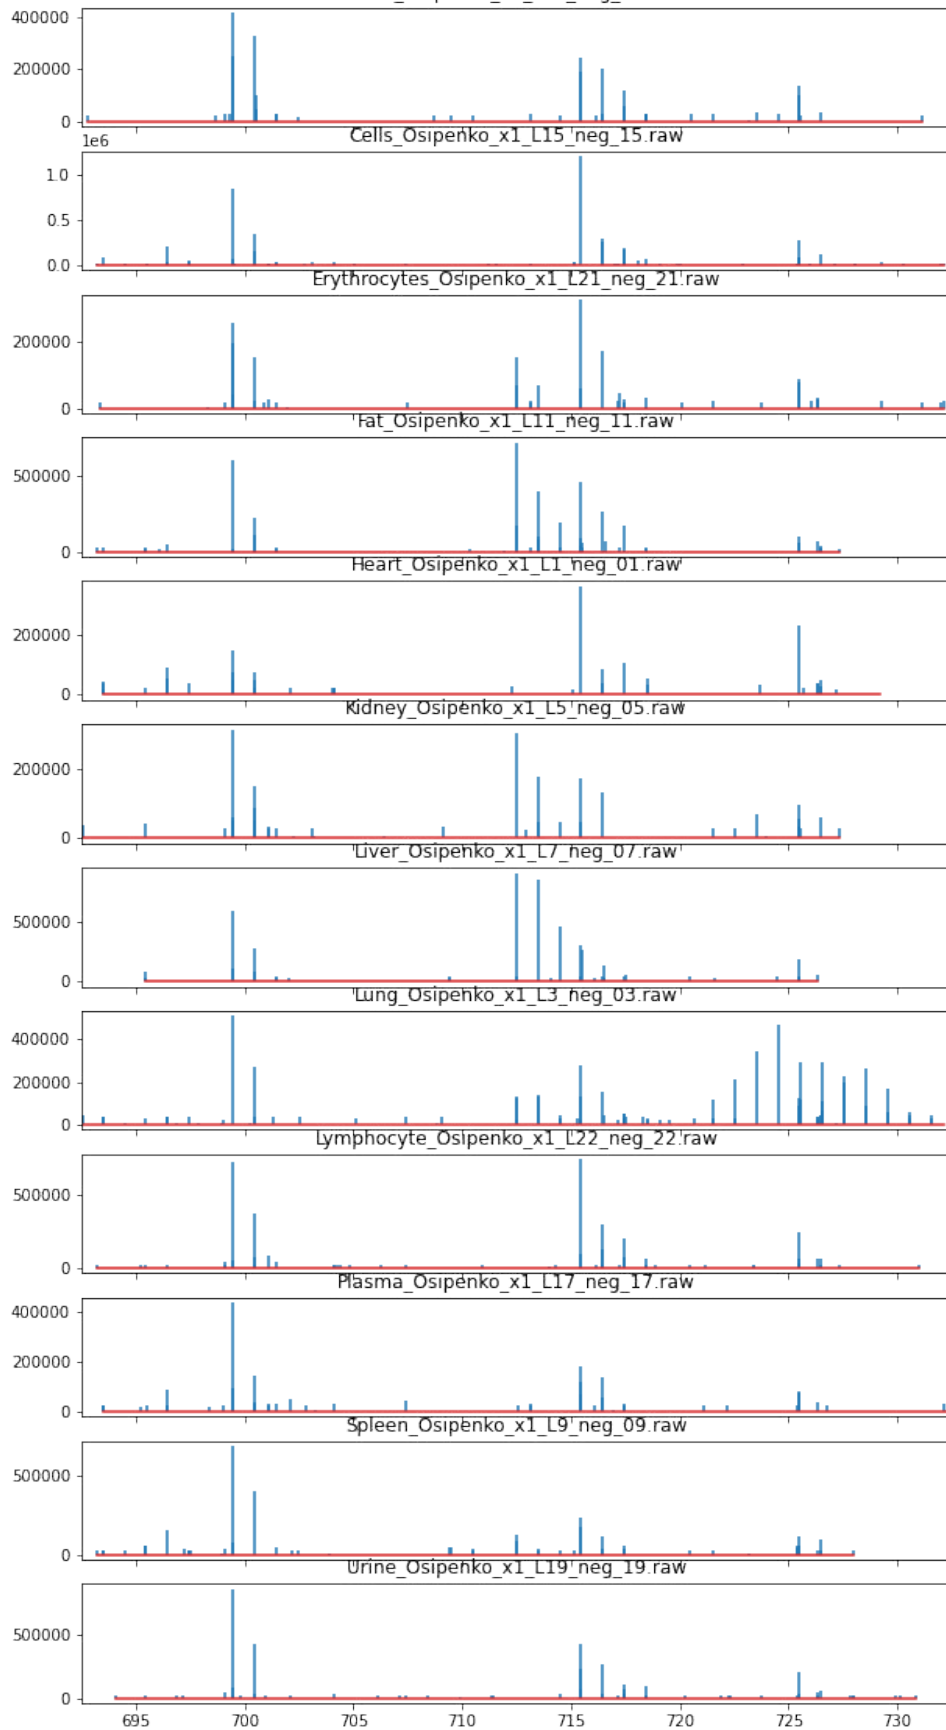

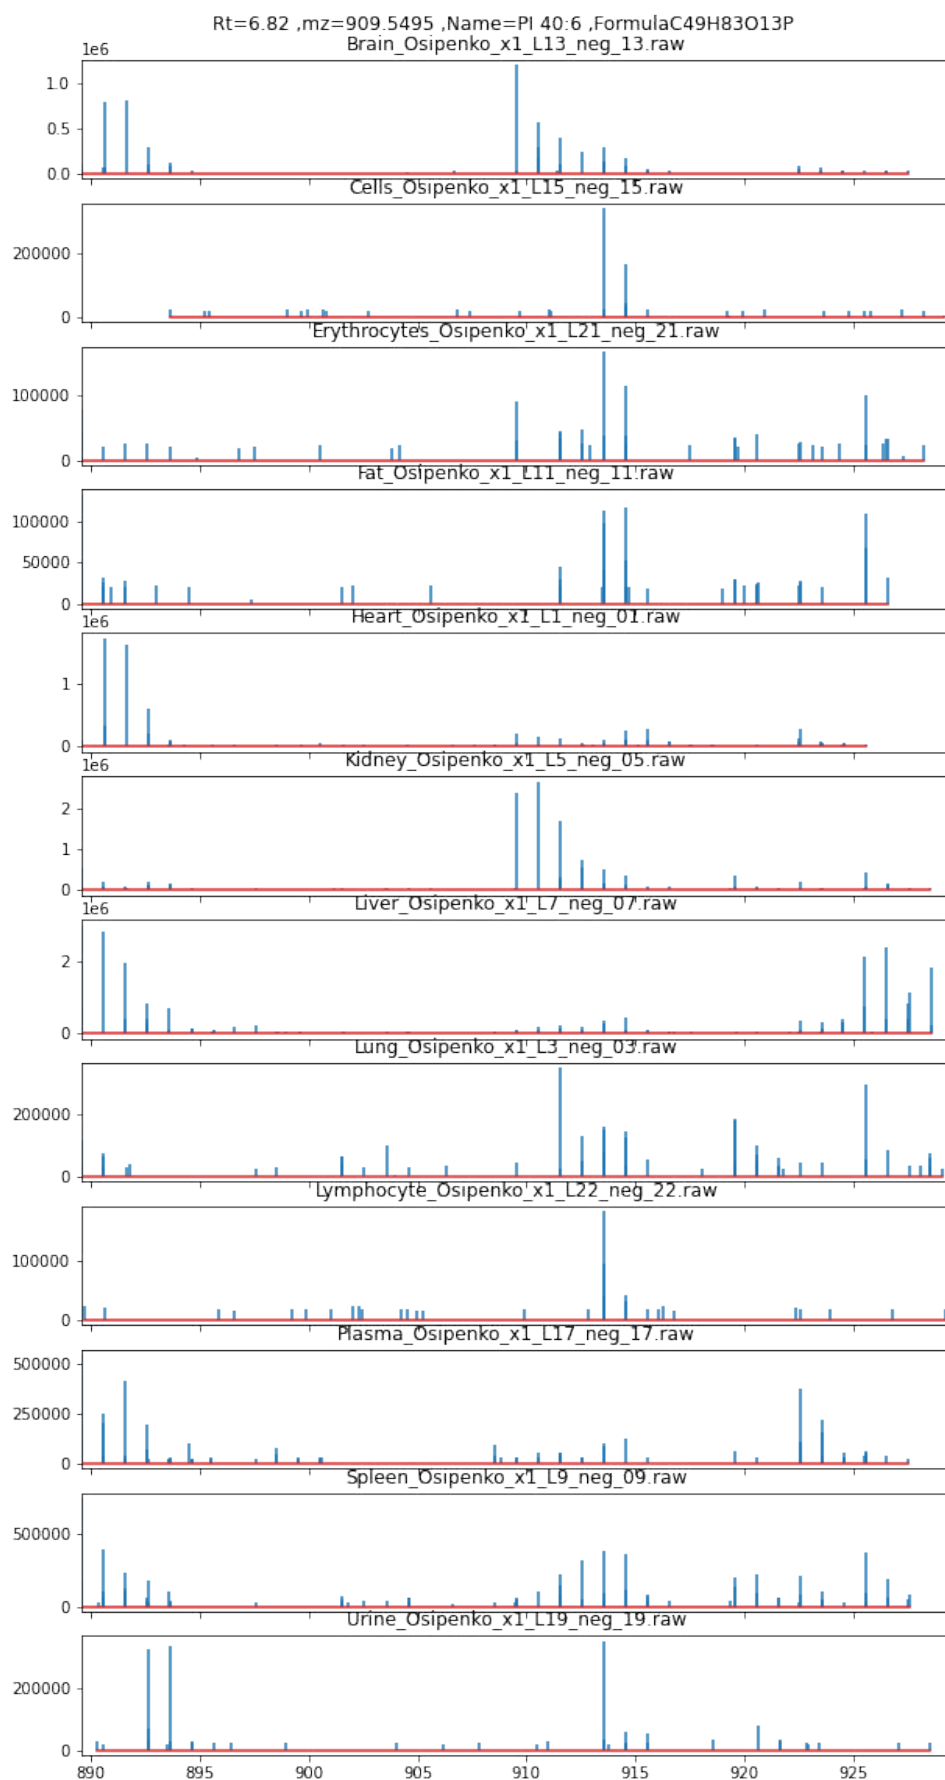

Rt=6.91 ,mz=814.55896 ,Name=PC 34:3 PC 16:0 18:3 ,FormulaC42H78NO8P  
Brain\_Osipenko\_x1\_L13\_neg\_13.raw

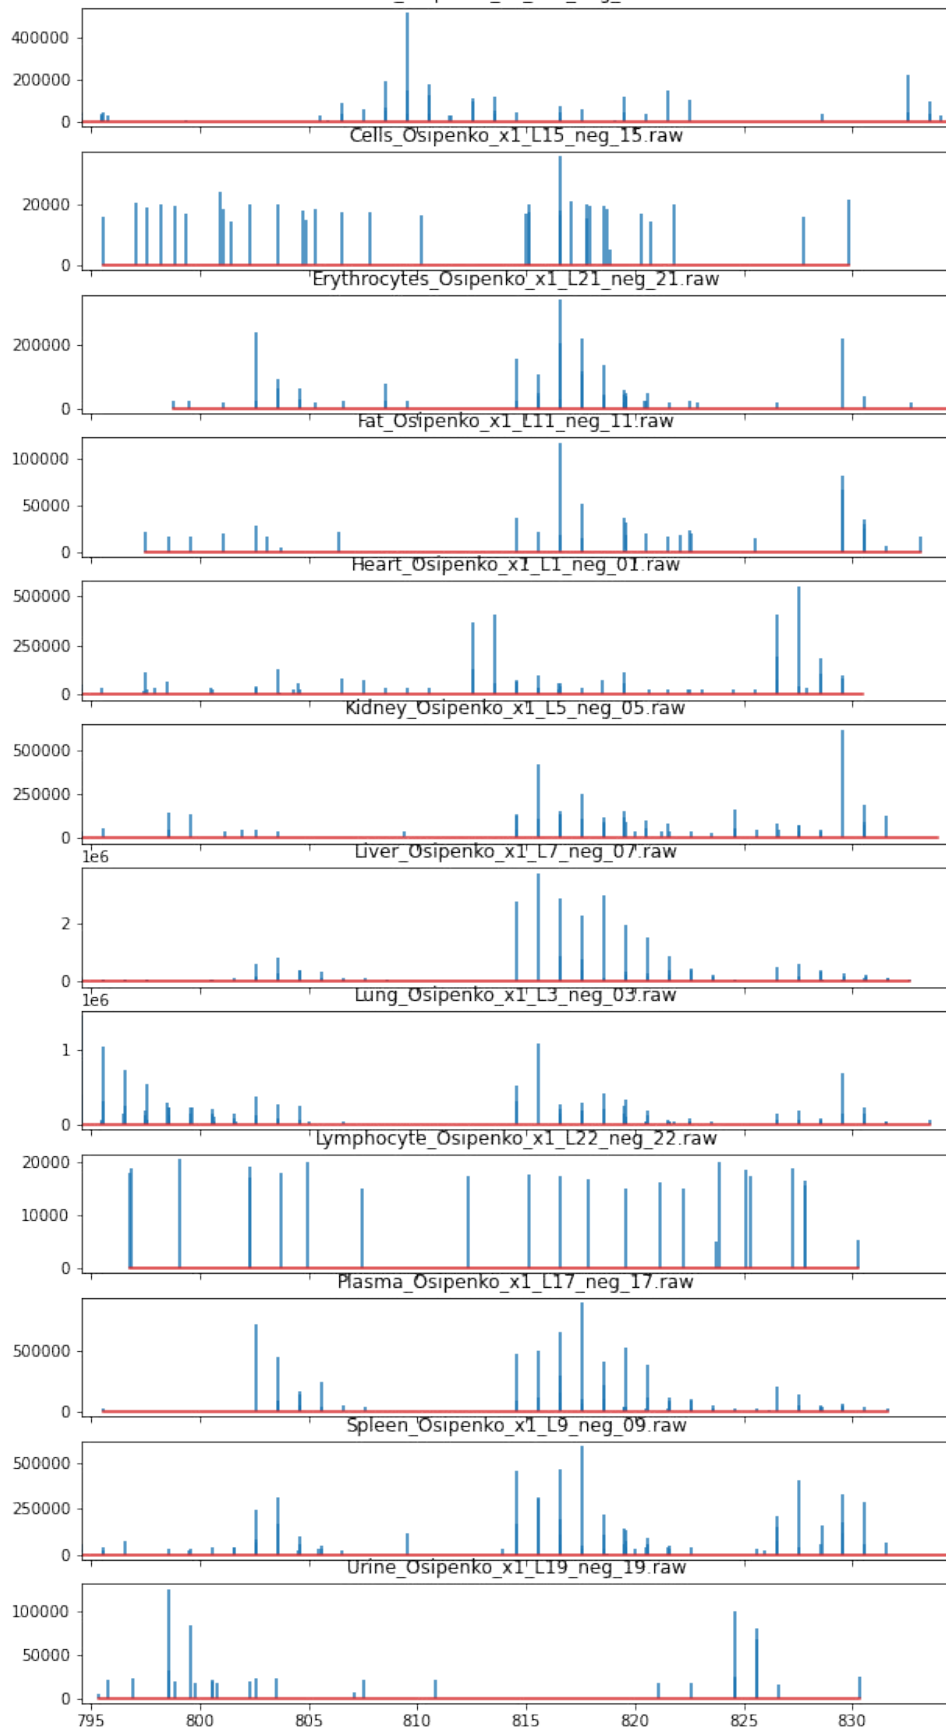

Rt=6.99 ,mz=764.54443 ,Name=PC O-30:1 O PC O-15:0 15:1 O ,FormulaC38H76NO8P  
Brain\_Osipenko\_x1\_L13\_neg\_13.raw

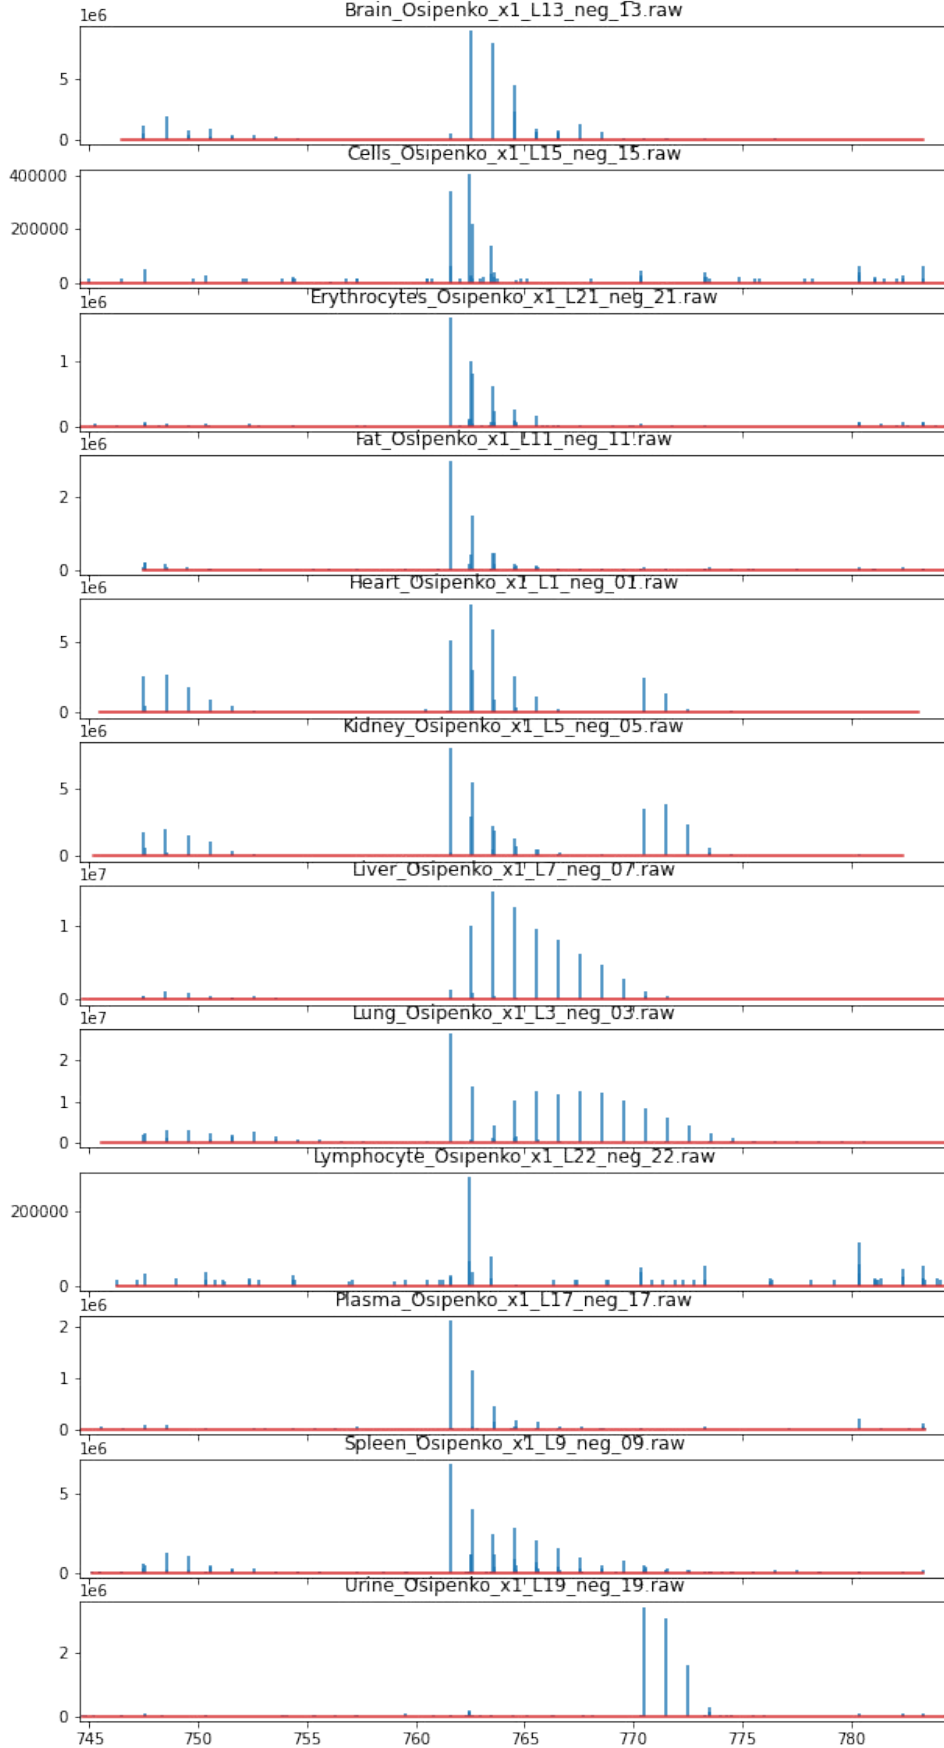

Rt=6.114 ,mz=821.5329 ,Name=PG 40:6 PG 18:2\_22:4 ,FormulaC46H79O10P  
Brain\_Osipenko\_x1\_L13\_neg\_13.raw

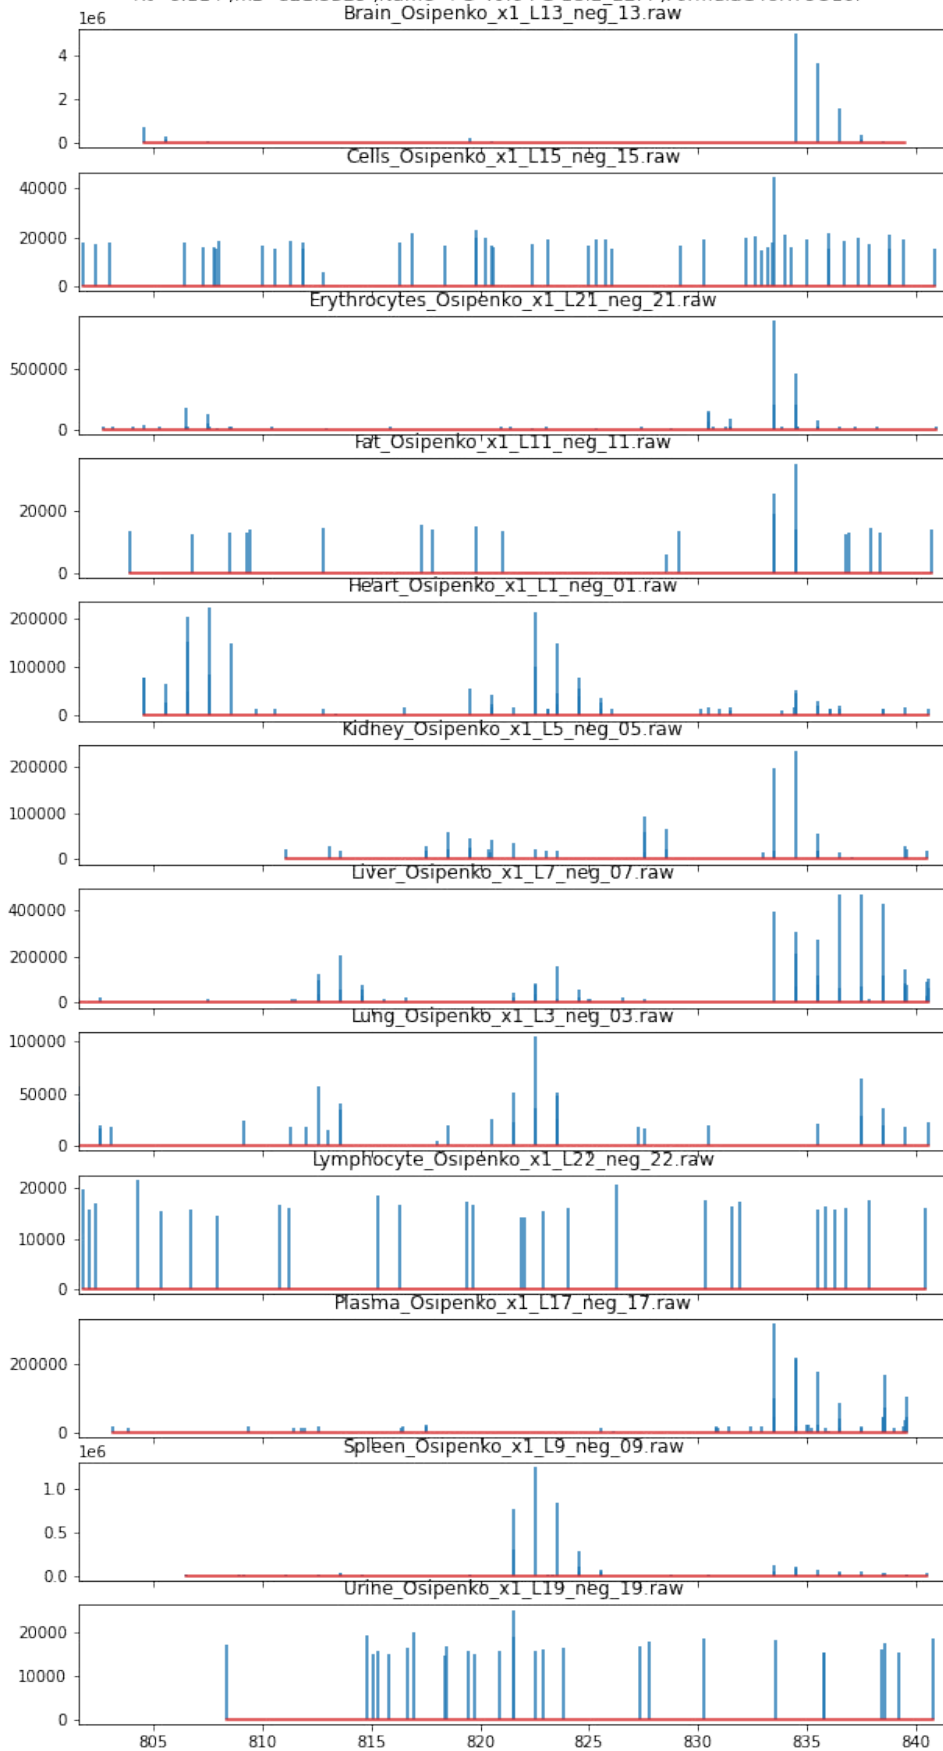



Rt=6.148 ,mz=795.51831 ,Name=PG 38:5 PG 18:1 20:4 ,FormulaC44H77O10P  
Brain\_Osipenko\_x1\_L13\_neg\_13.raw

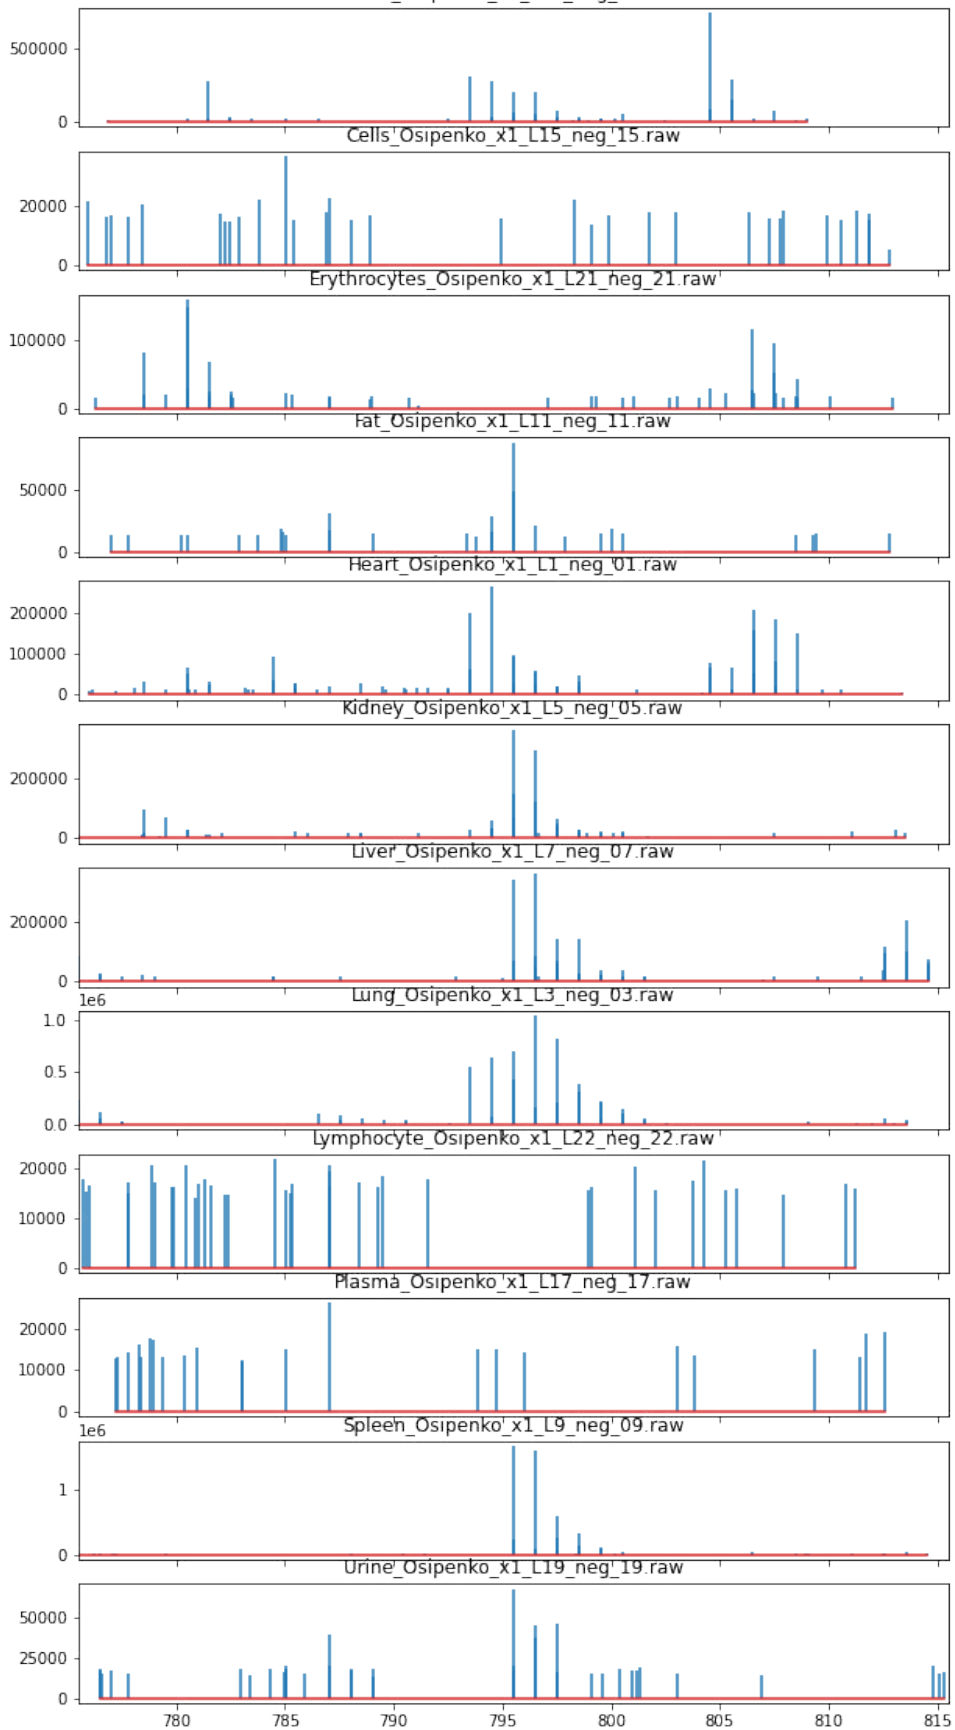

Rt=6.152 ,mz=759.56659 ,Name=SM 34:2 O2 SM 18:2 O2 16:0 ,FormulaC39H77N2O6P  
Brain\_Osipenko\_x1\_L13\_neg\_13.raw

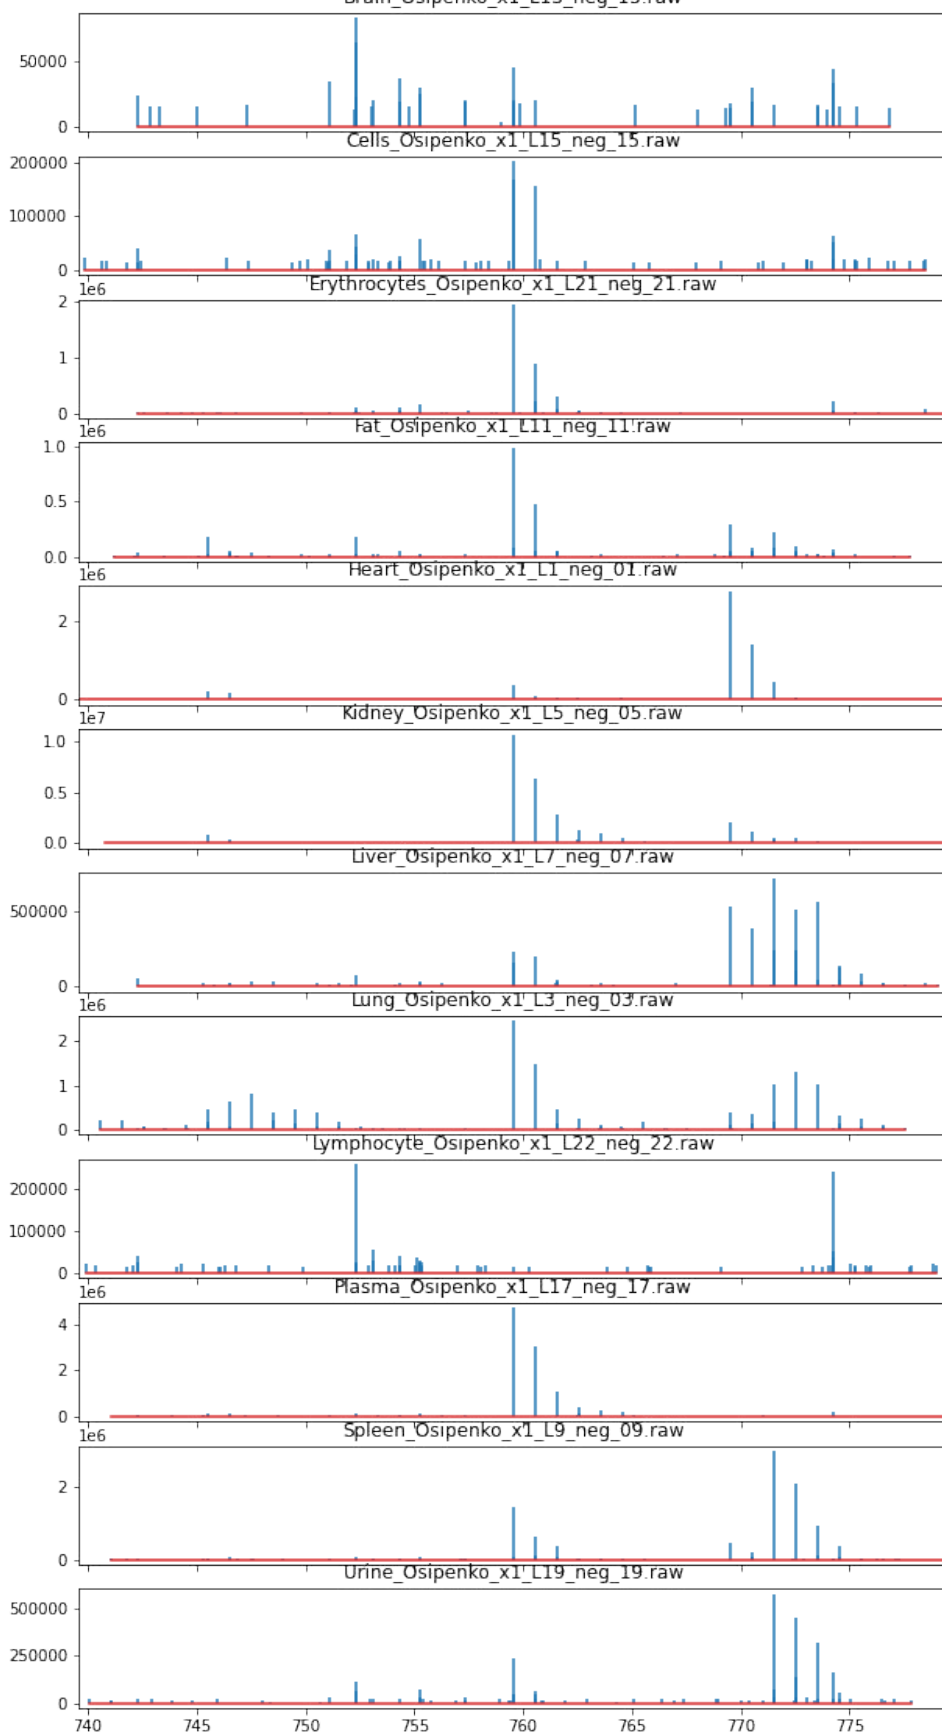

Rt=6.163 ,mz=771.51898 ,Name=PG 36:3 PG 18:1 18:2 ,FormulaC42H77O10P  
Brain\_Osipenko\_x1\_L13\_neg\_13.raw

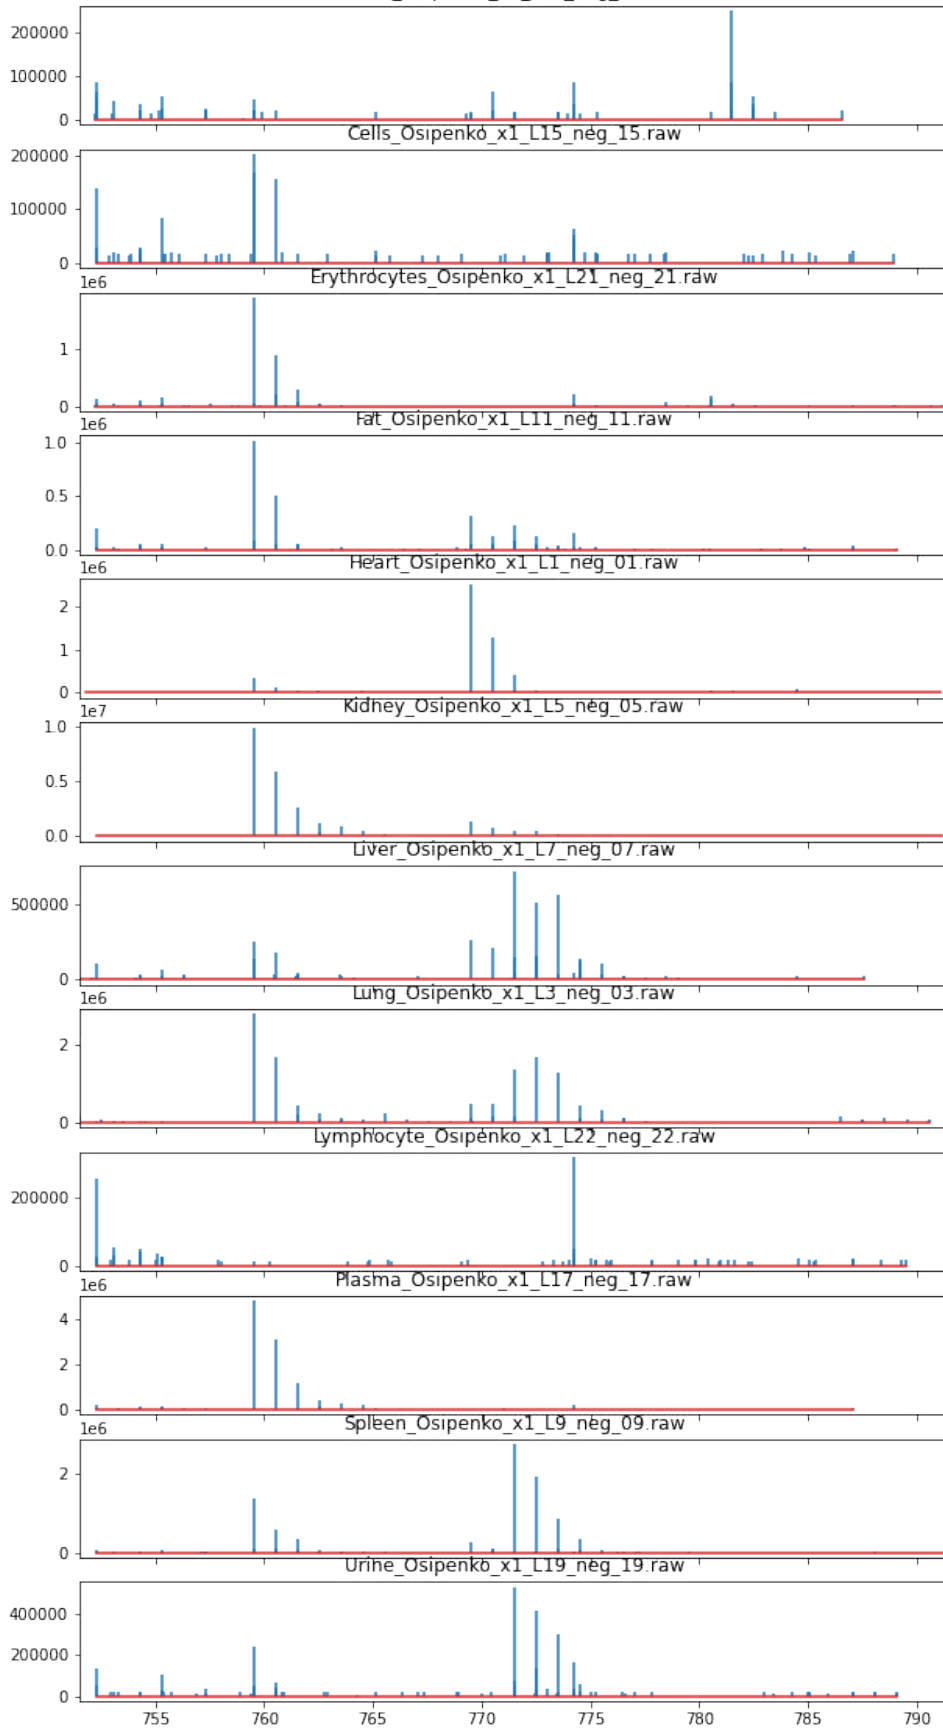

Rt=6.222 ,mz=793.50098 ,Name=PG 38:6 PG 16:0 22:6 ,FormulaC44H75O10P  
Brain\_Osipenko\_x1\_L13\_neg\_13.raw

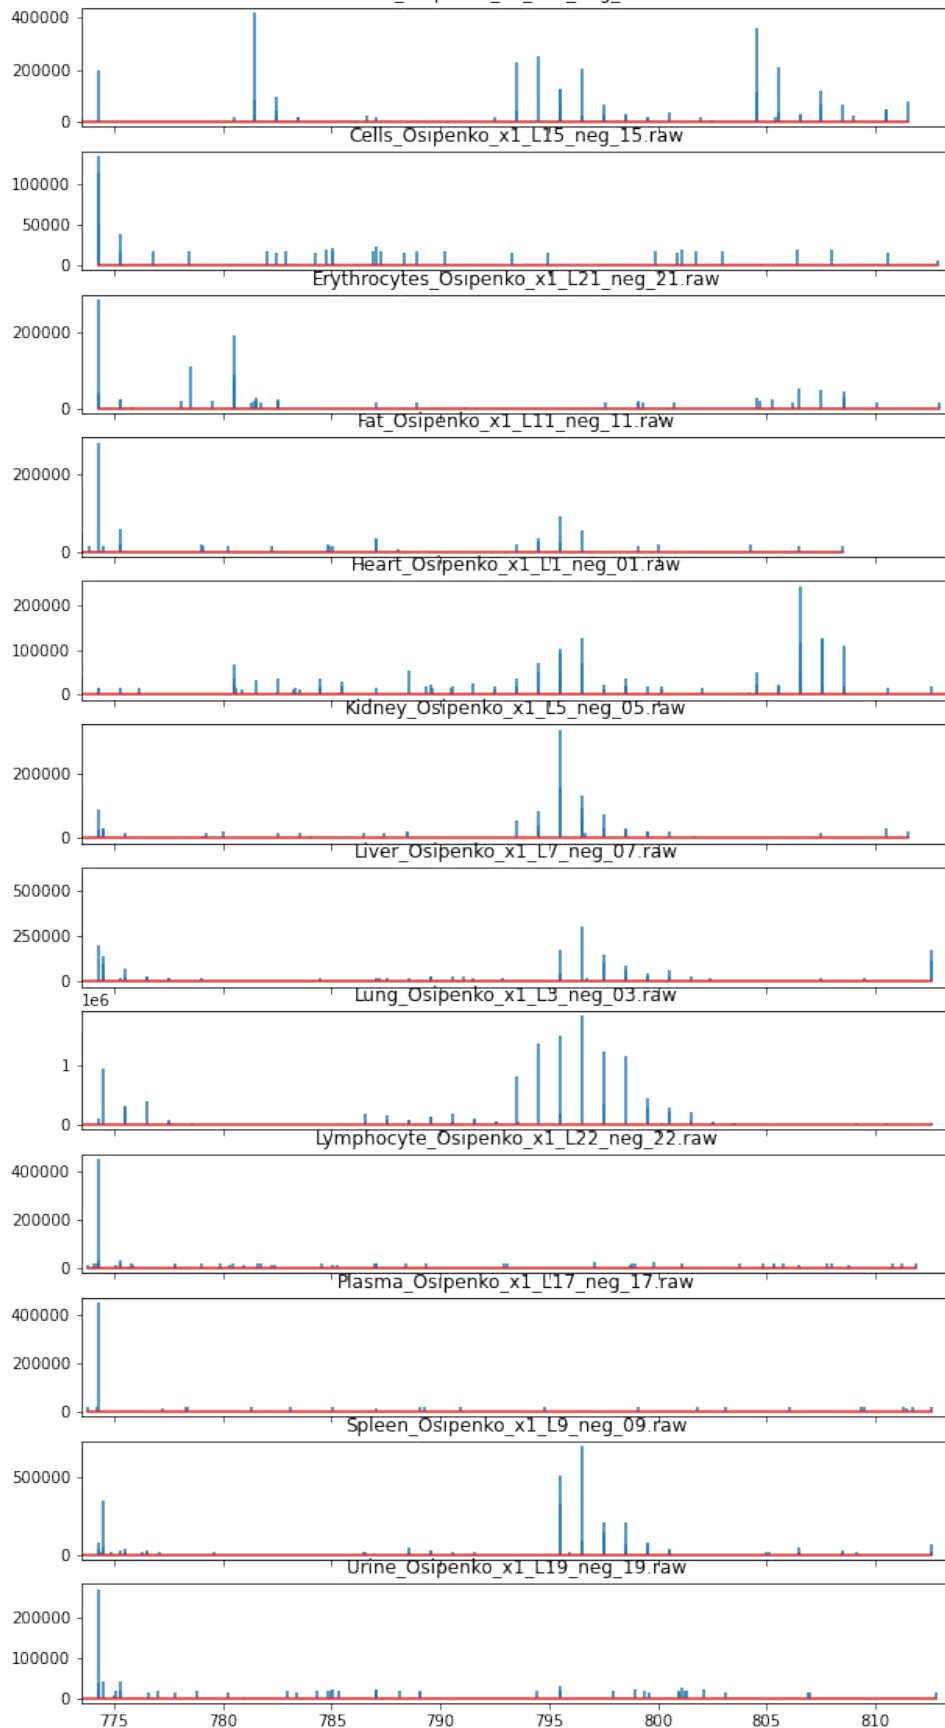

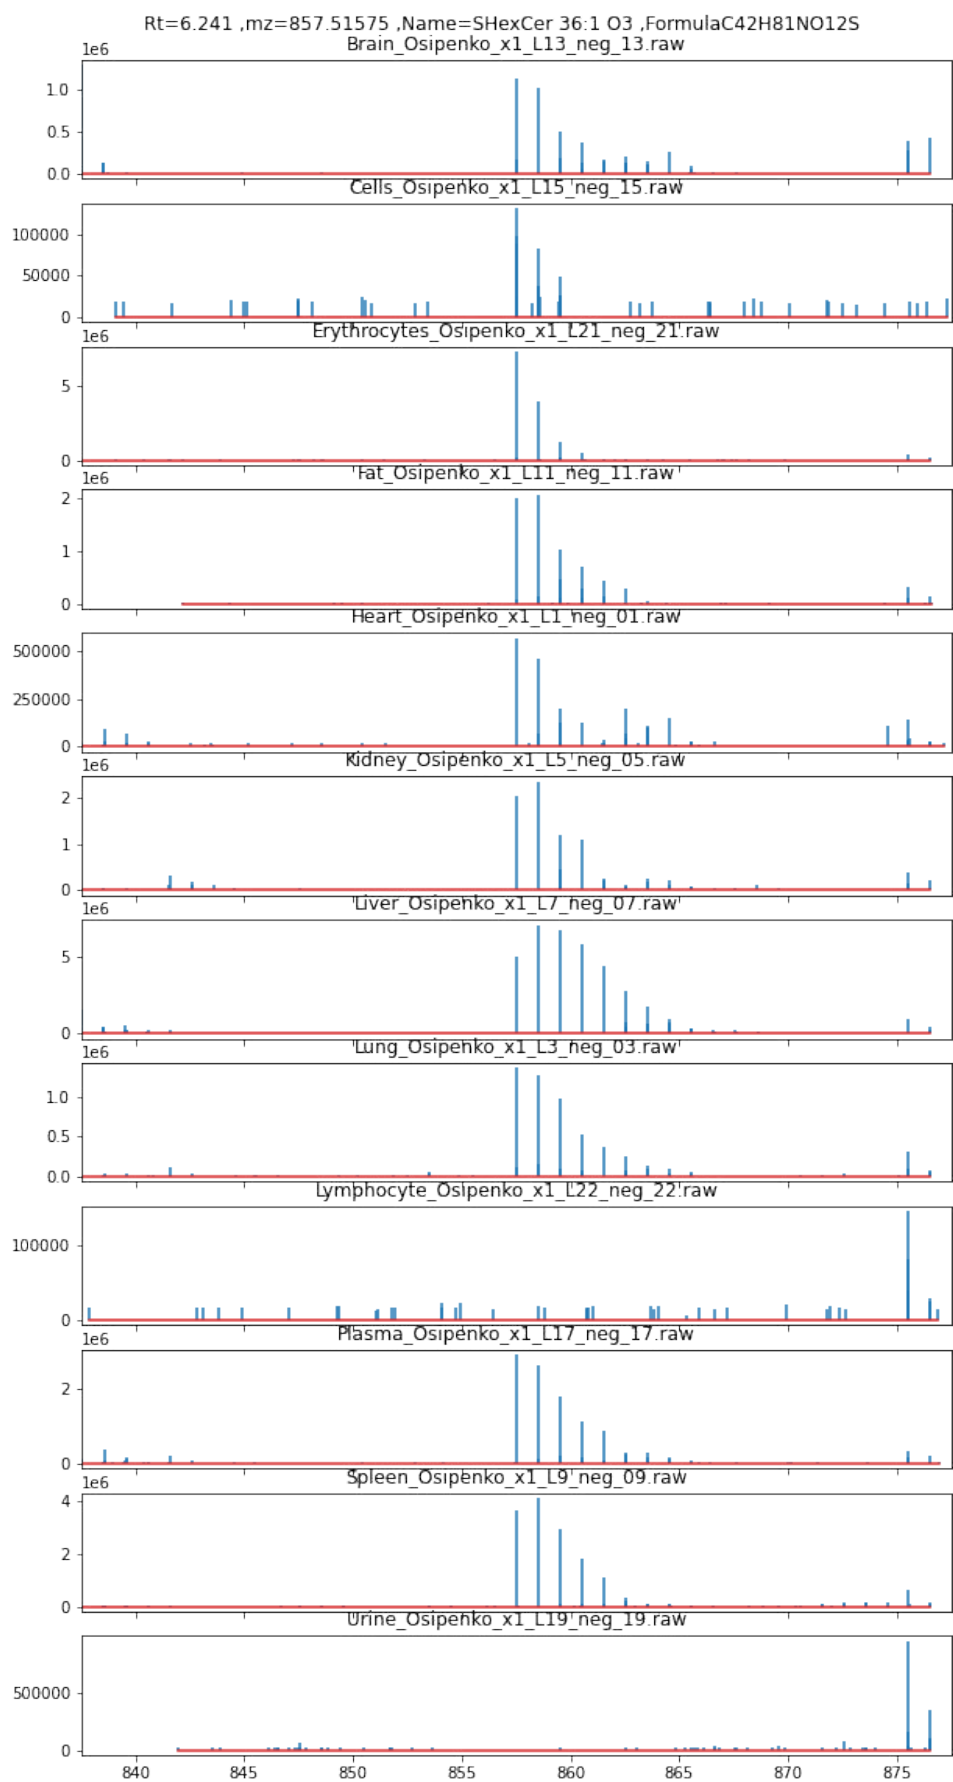

Rt=6.264 ,mz=719.48944 ,Name=PG 32:1 PG 16:0 16:1 ,FormulaC38H73O10P  
Brain\_Osipenko\_x1\_L13\_neg\_13.raw

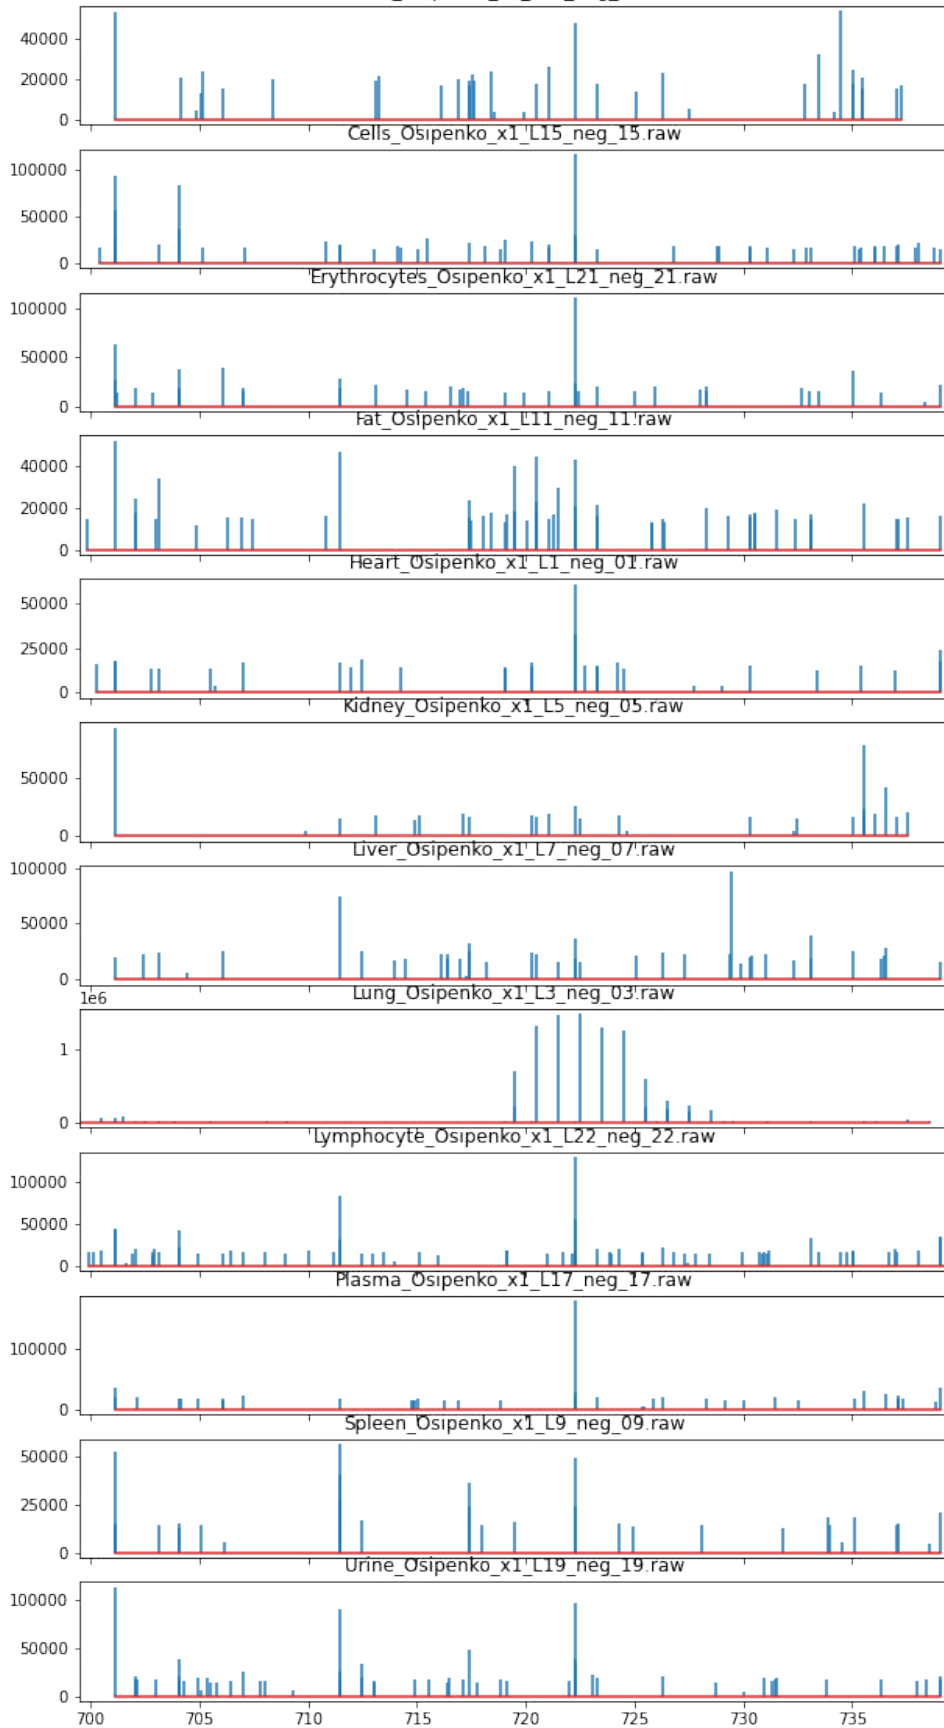

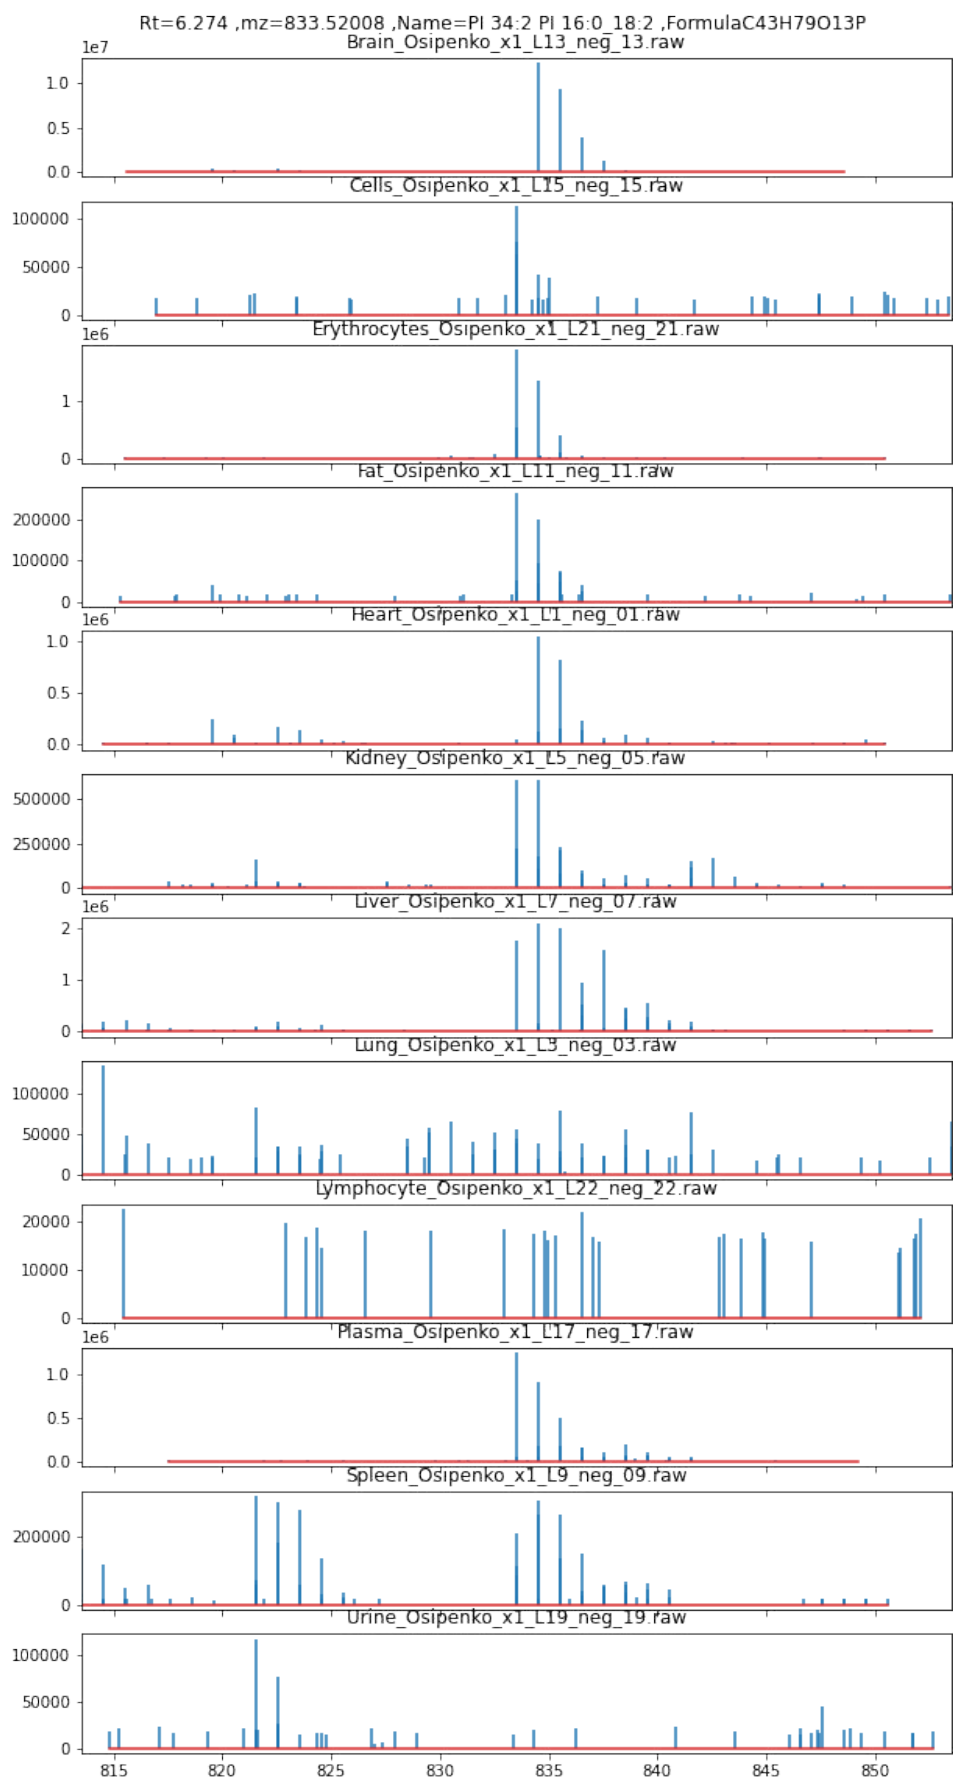

Rt=6.305 ,mz=745.50549 ,Name=PG 34:2 PG 16:0 18:2 ,FormulaC40H75O10P  
Brain\_Osipenko\_x1\_L13\_neg\_13.raw

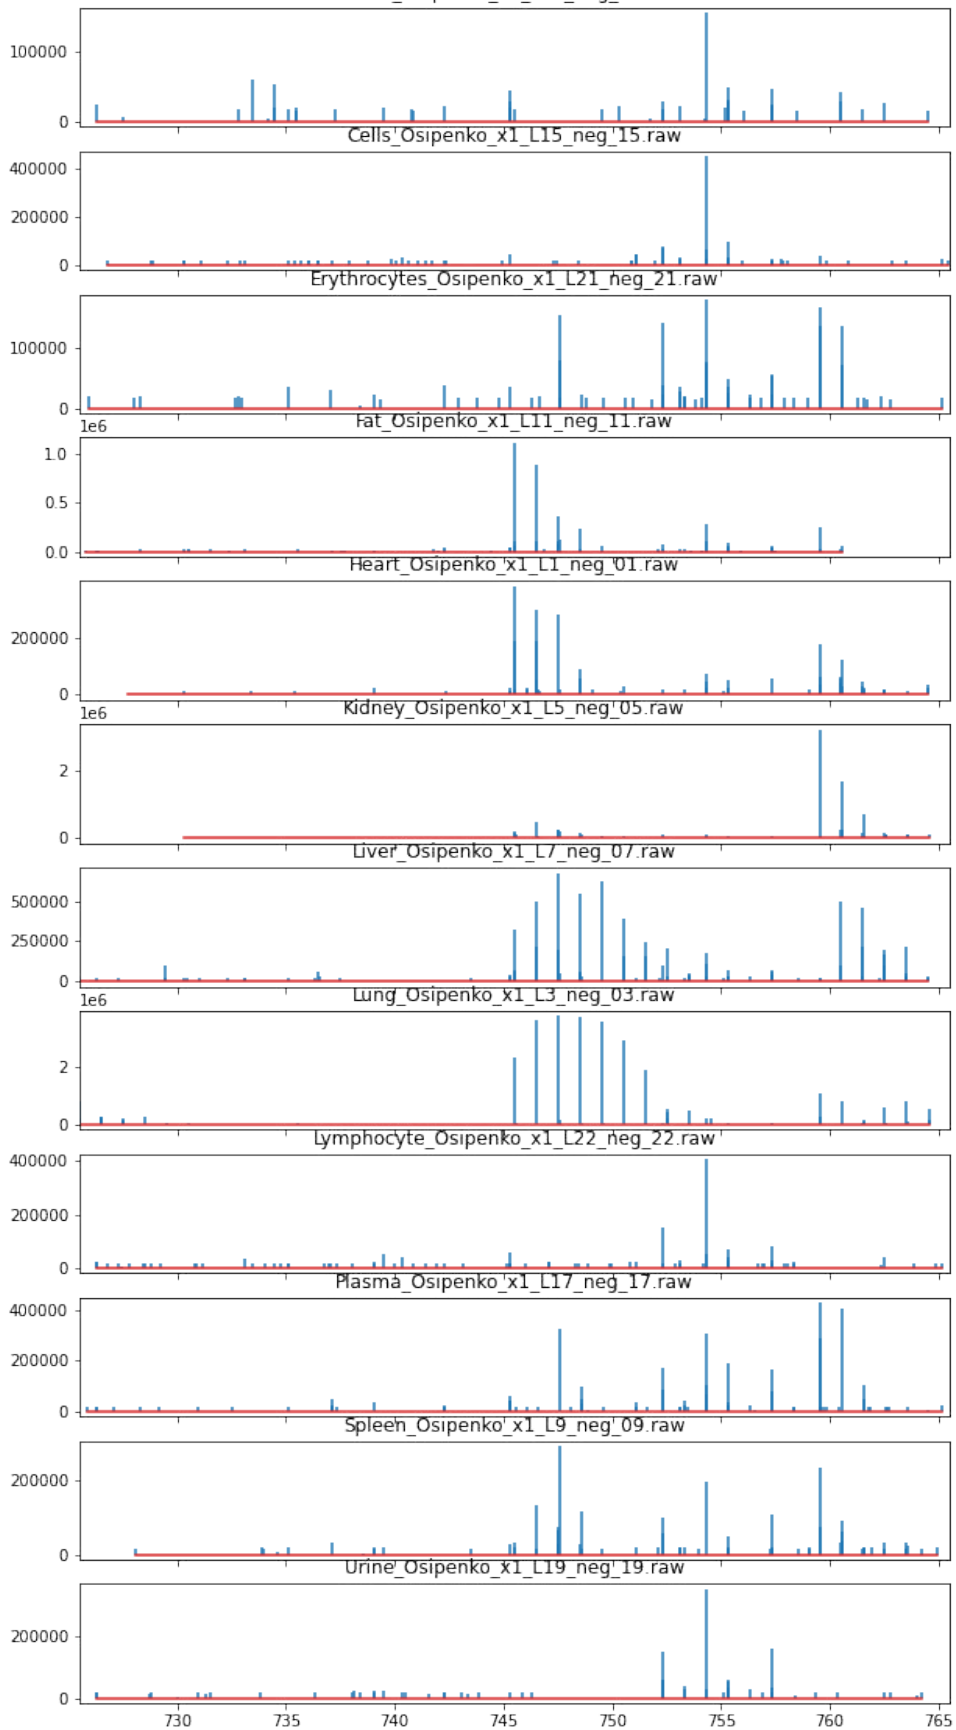



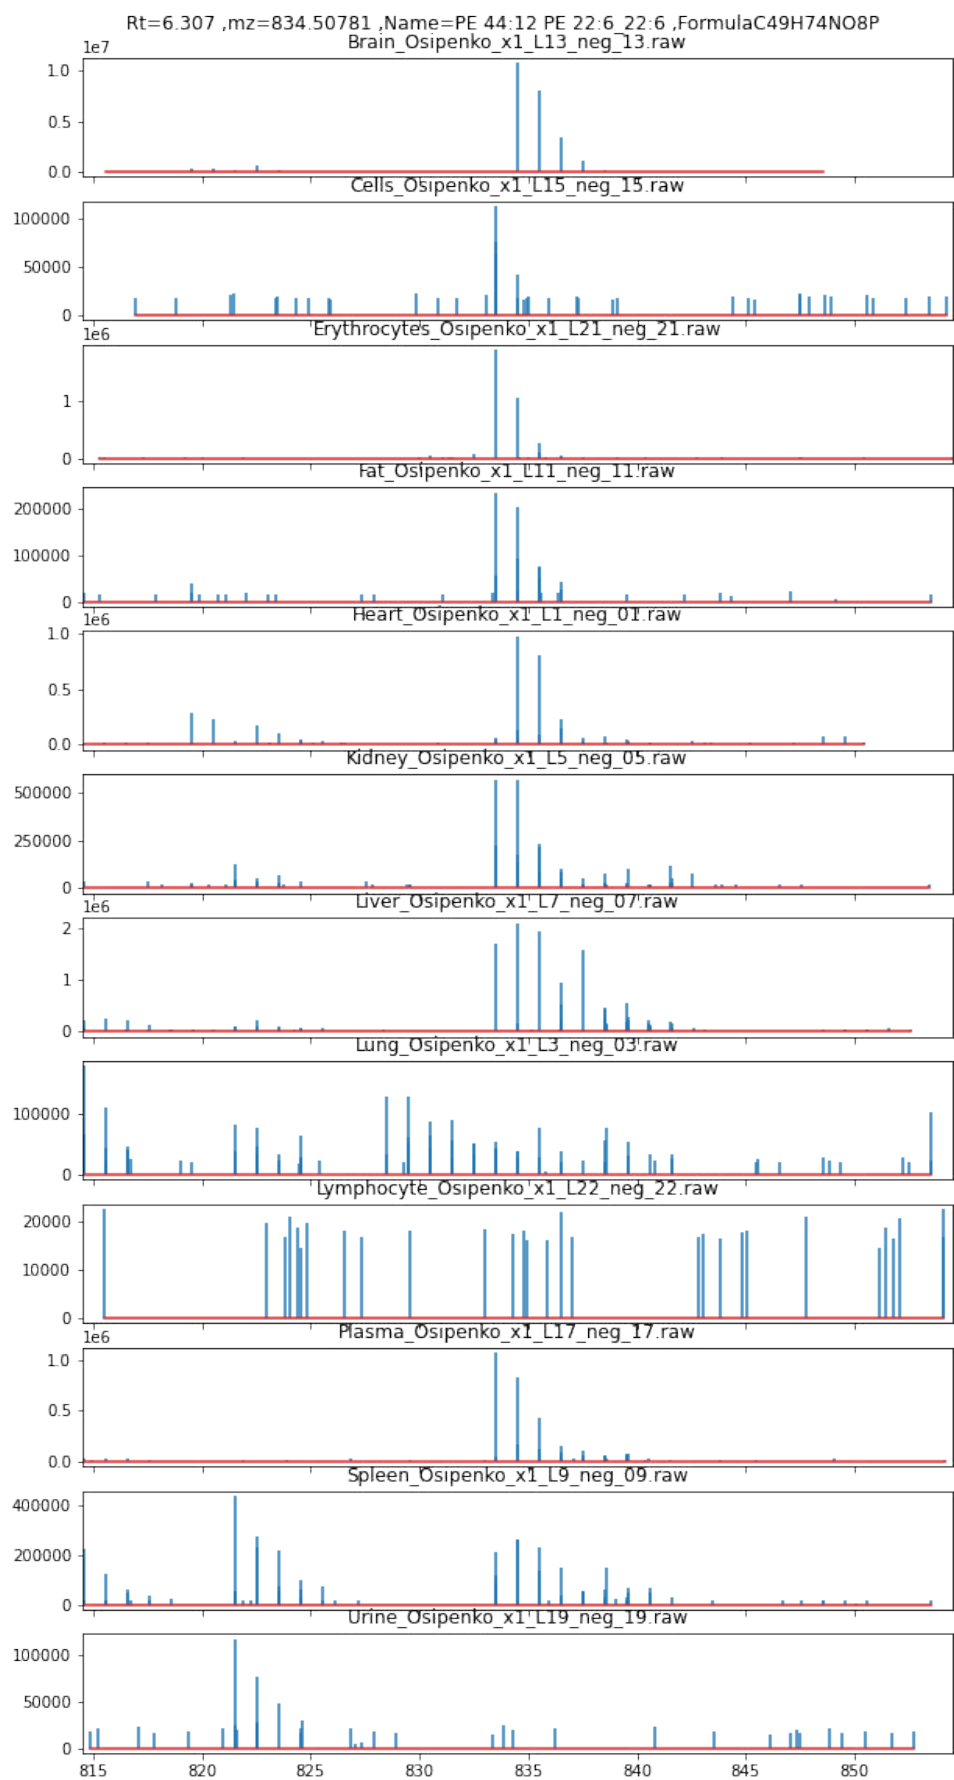

Rt=6.343 ,mz=719.48877 ,Name=PG 32:1 PG 16:0 16:1 ,FormulaC38H73O10P  
Brain\_Osipenko\_x1\_L13\_neg\_13.raw

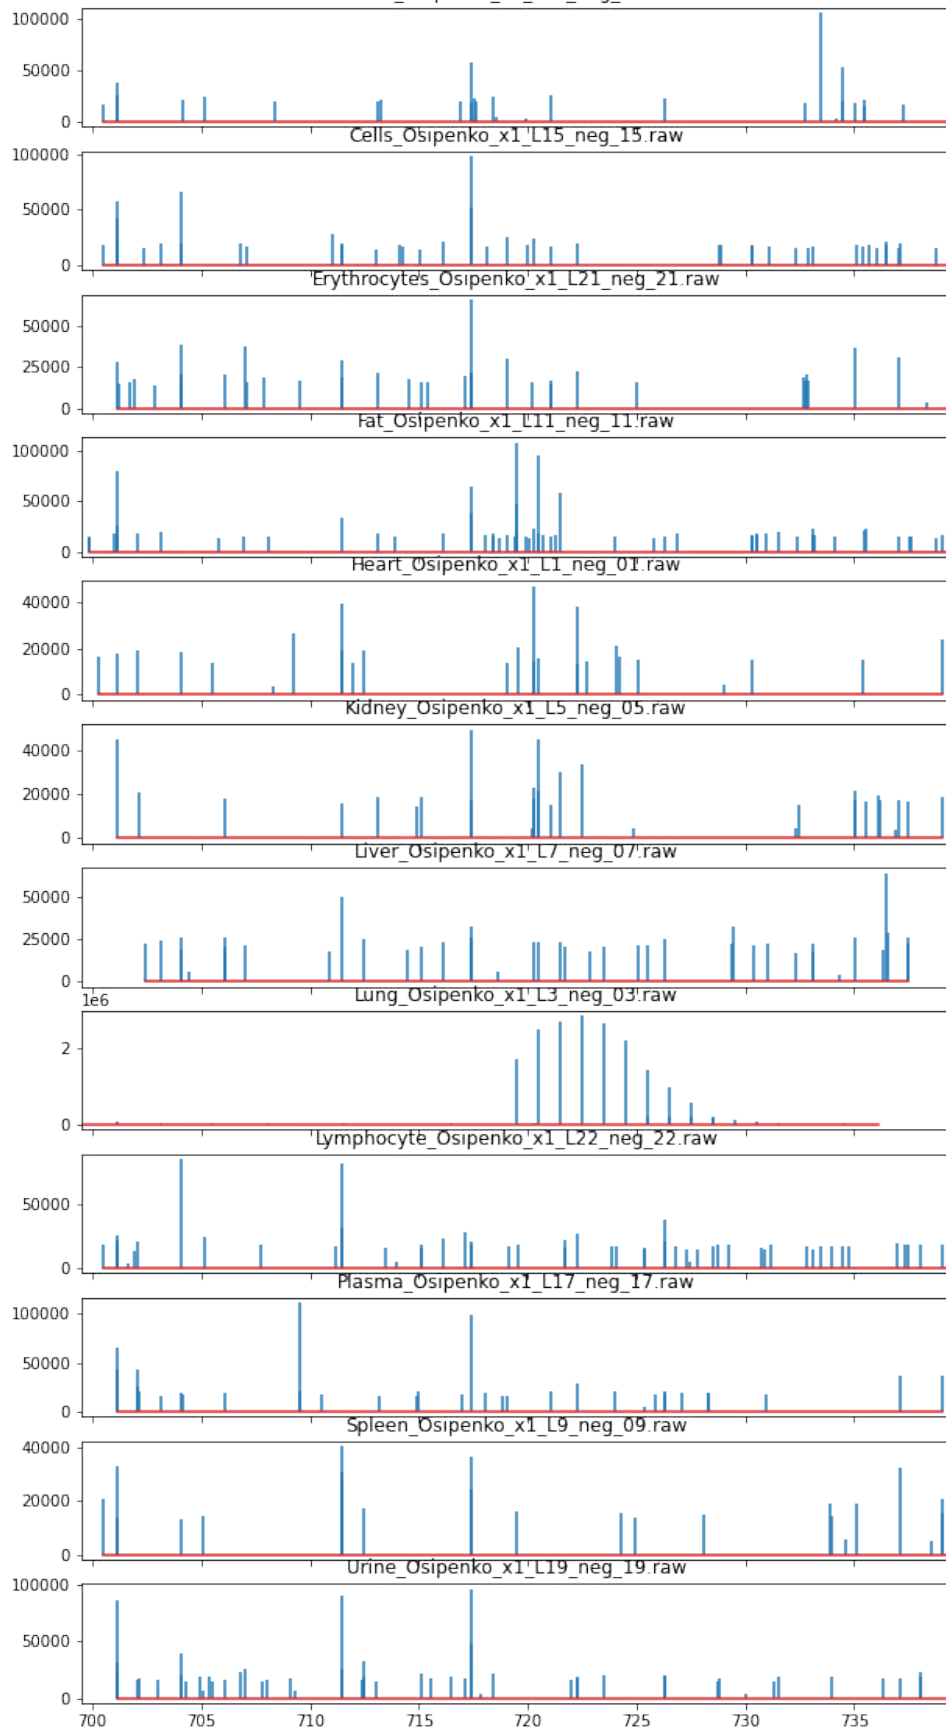

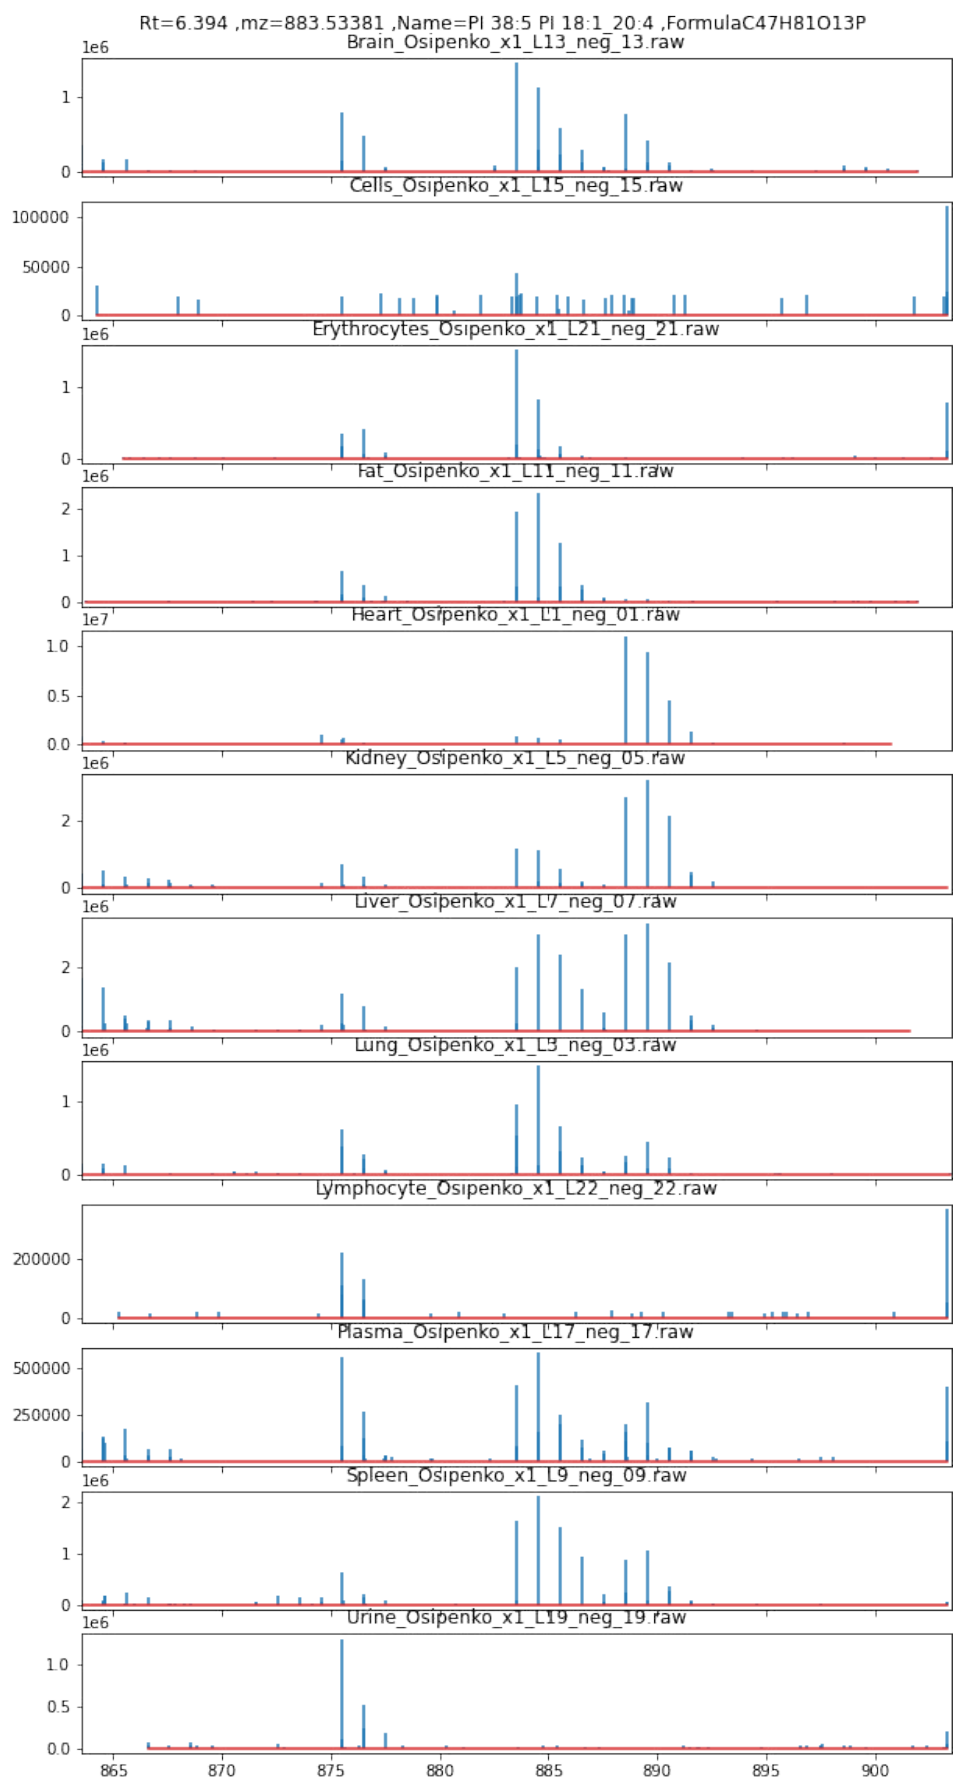

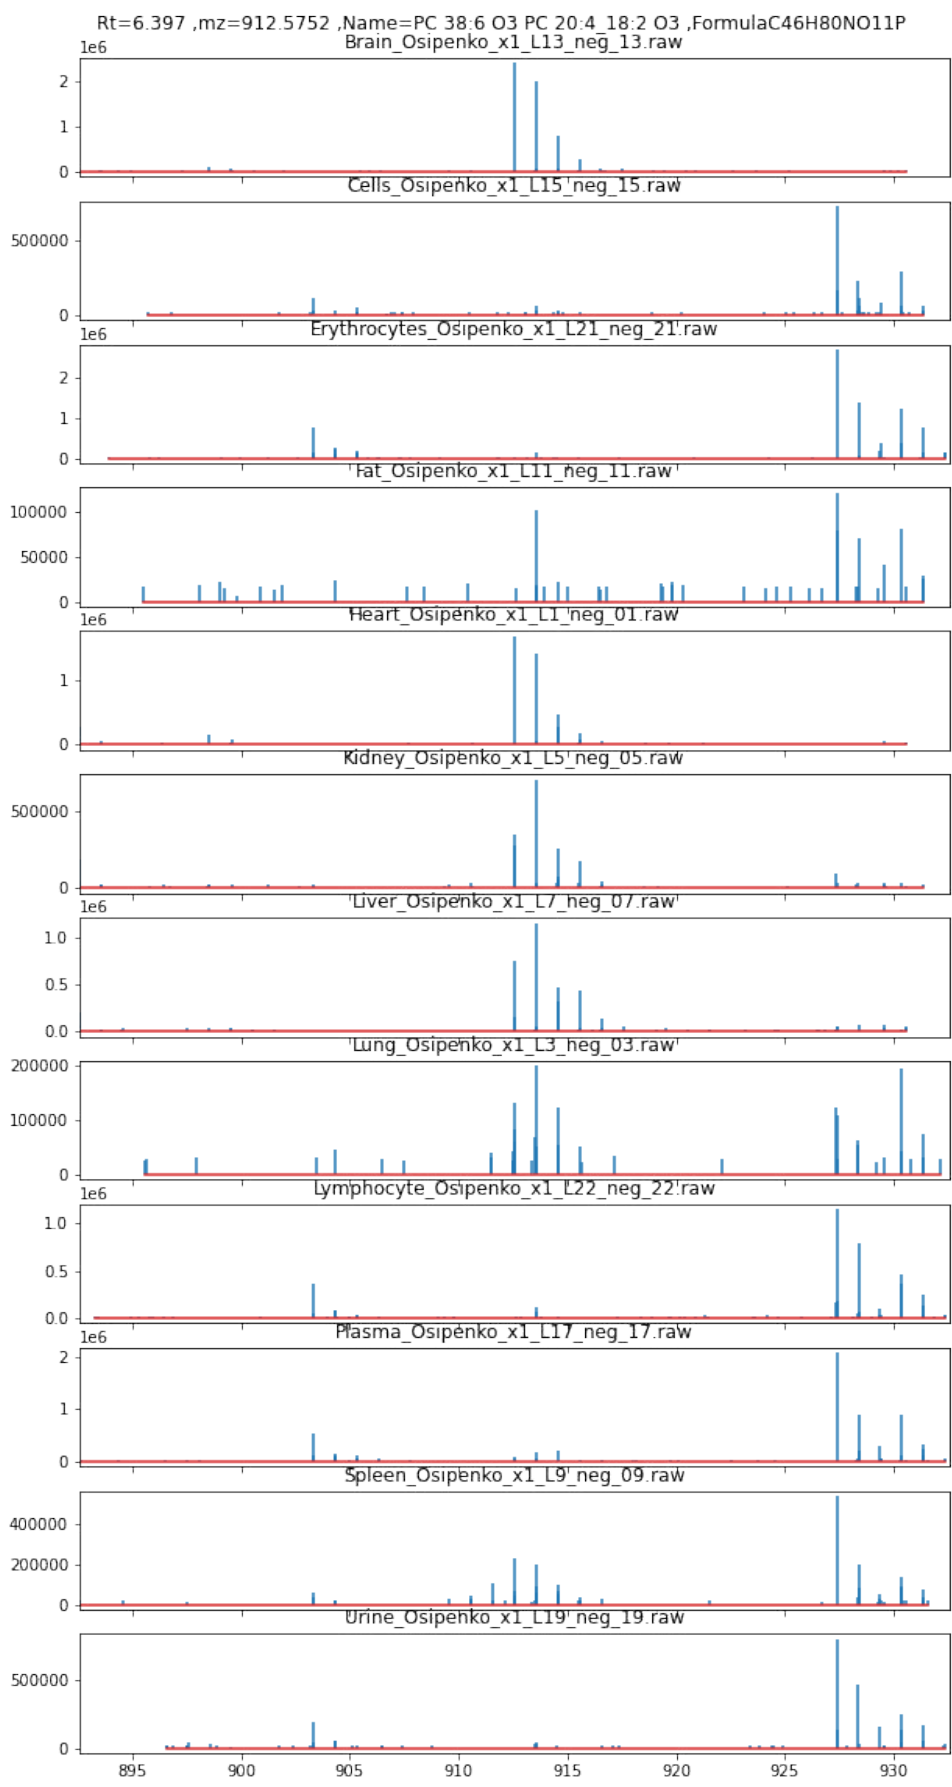

Rt=6.412 ,mz=747.56567 ,Name=SM 33:1 O2 ,FormulaC38H77N2O6P  
Brain\_Osipenko\_x1\_L13\_neg\_13.raw

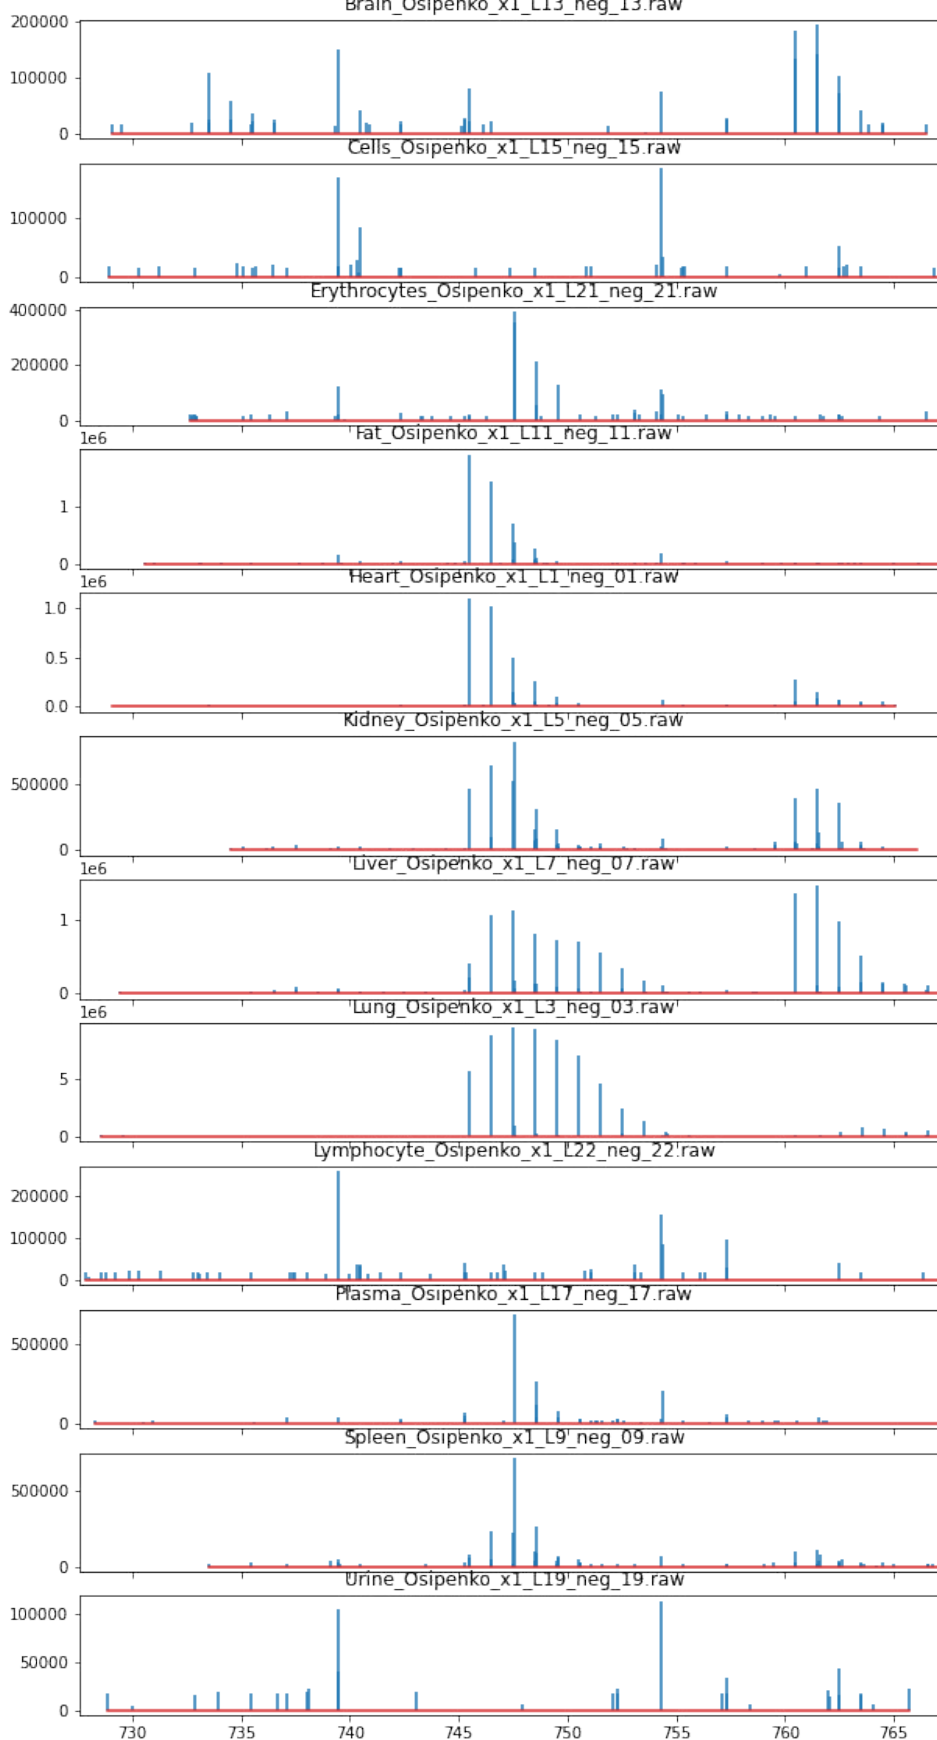

Rt=6.441 ,mz=859.53717 ,Name=PI 36:3 PI 18:1 18:2 ,FormulaC45H81O13P  
Brain\_Osipenko\_x1\_L13\_neg\_13.raw

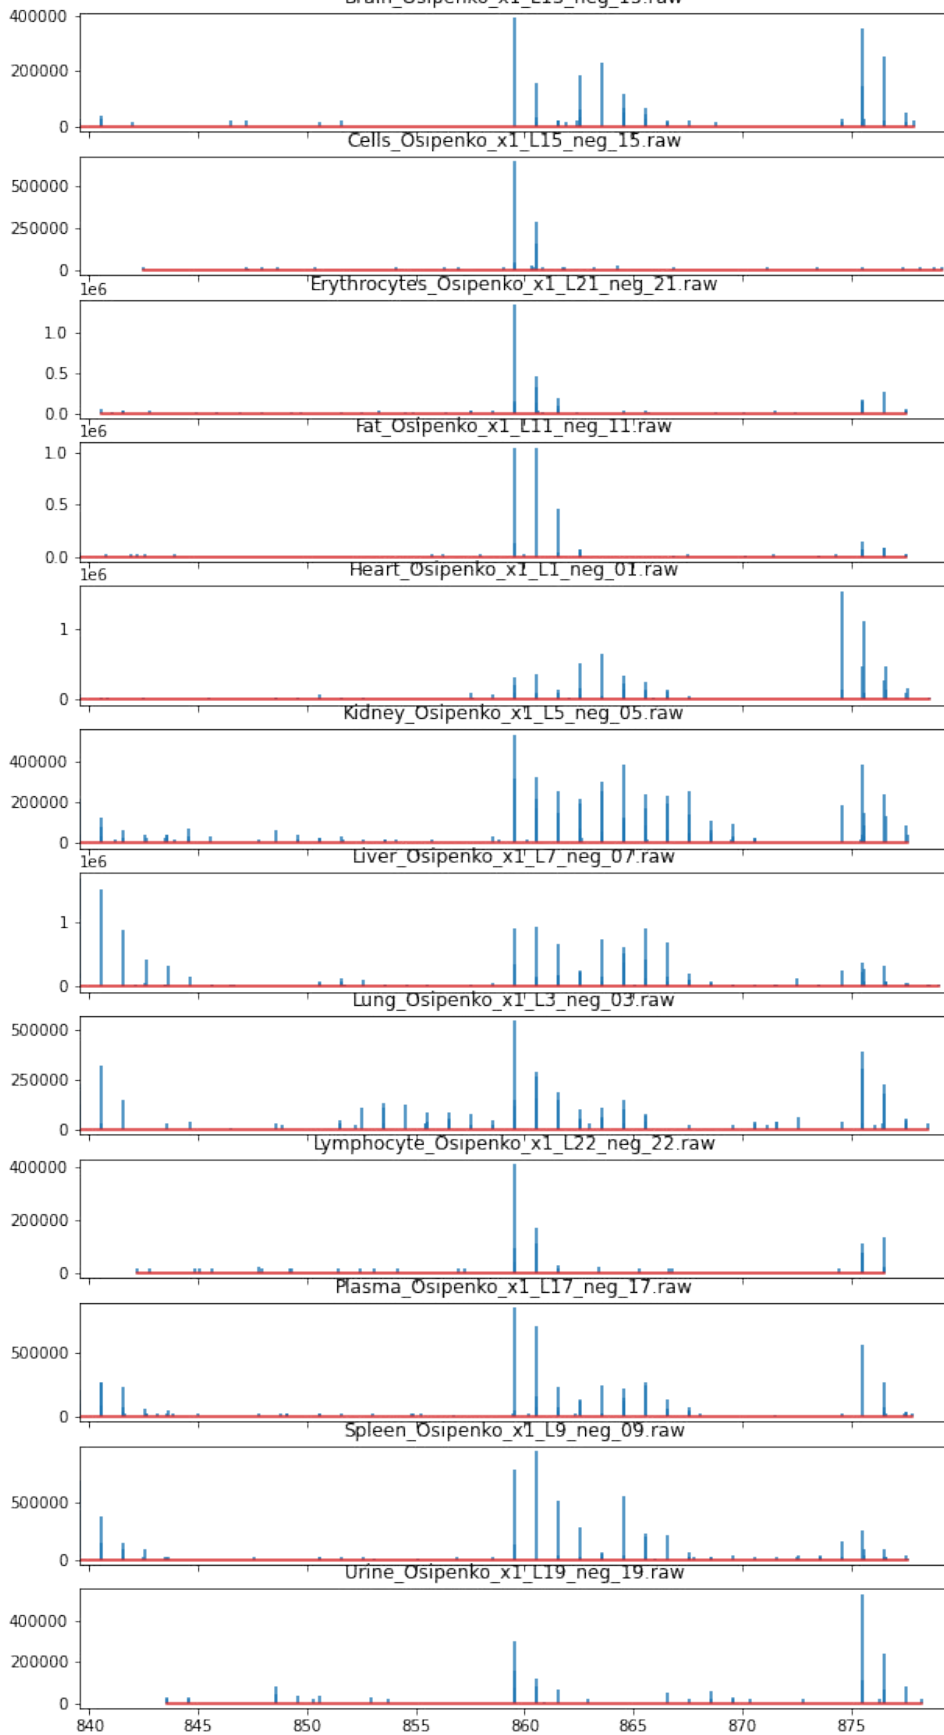

Rt=6.477 ,mz=838.56287 ,Name=PC 36:5 PC 18:2\_18:3 ,FormulaC44H78NO8P  
Brain\_Osipenko\_x1\_L13\_neg\_13.raw

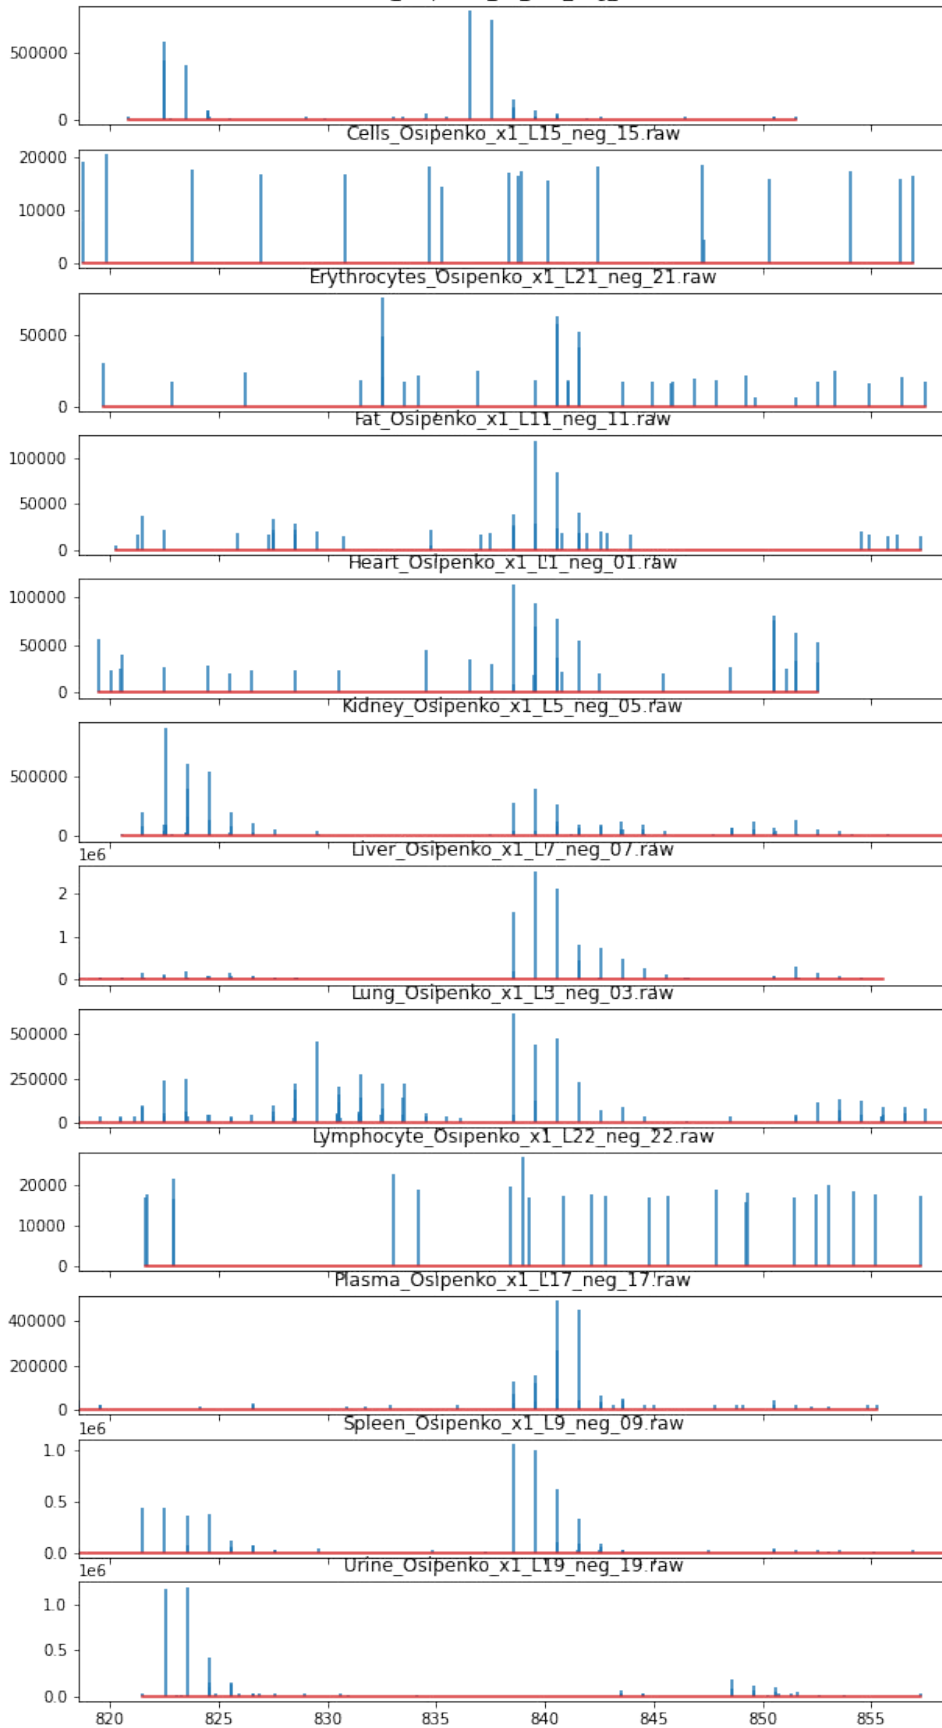

Rt=6.482 ,mz=760.49017 ,Name=PE 38:7 PE 16:1 22:6 ,FormulaC43H72NO8P  
Brain\_Osipenko\_x1\_L13\_neg\_13.raw

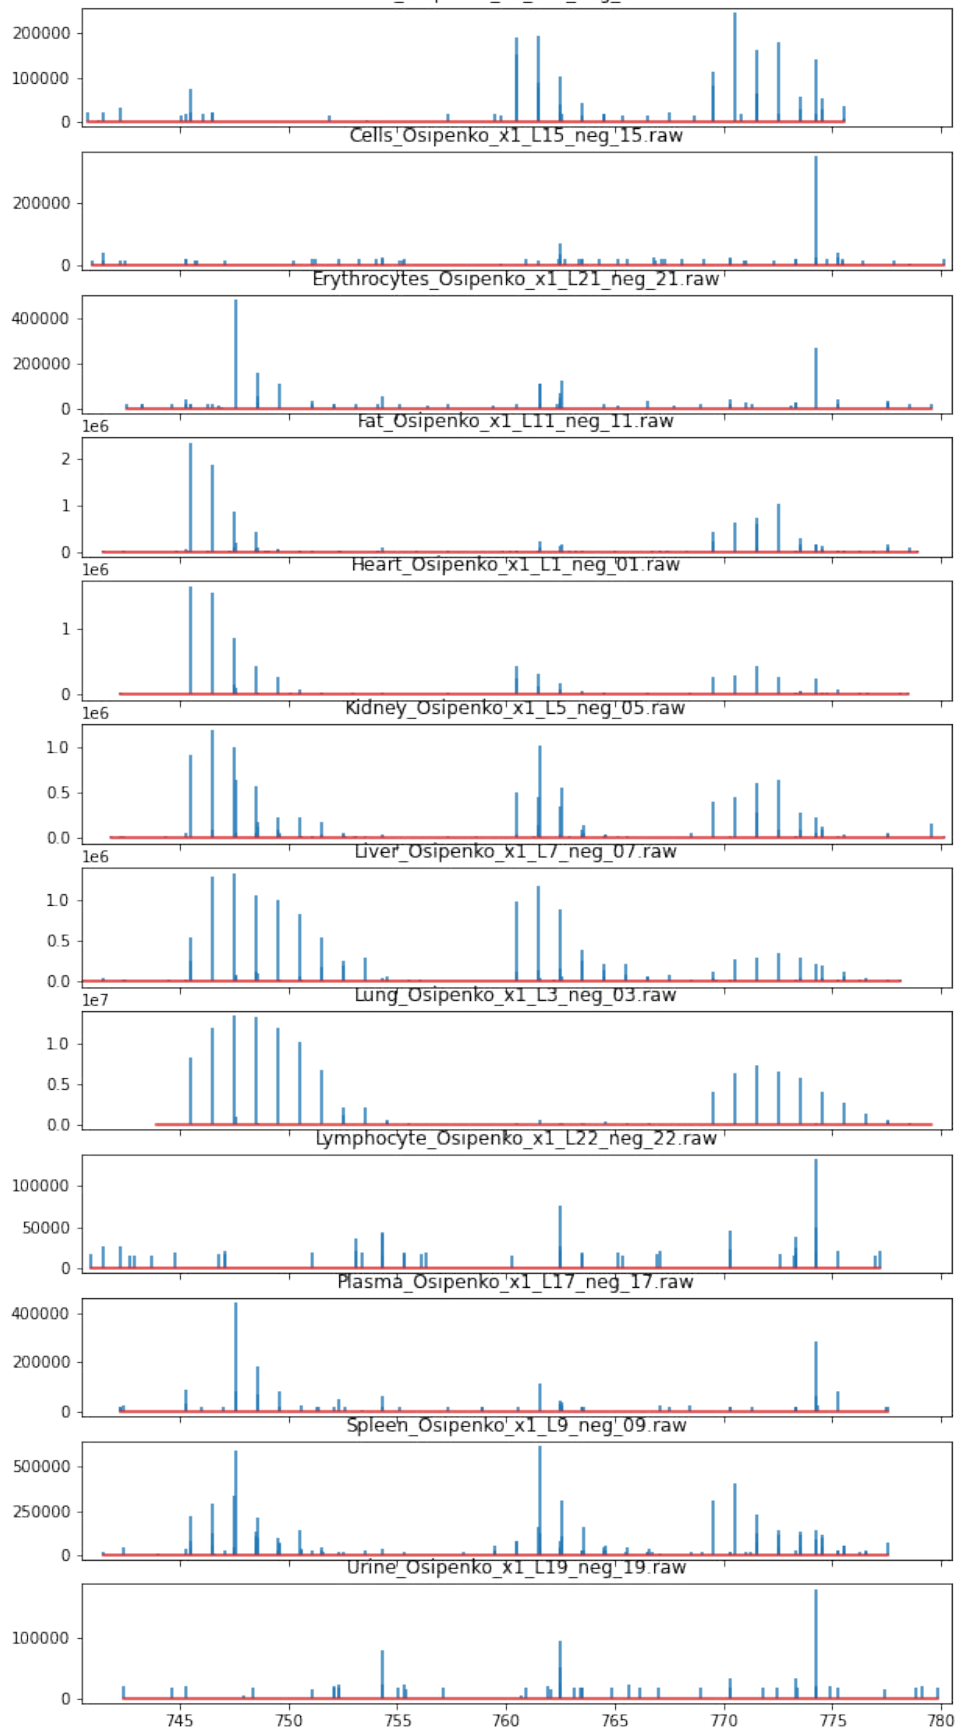



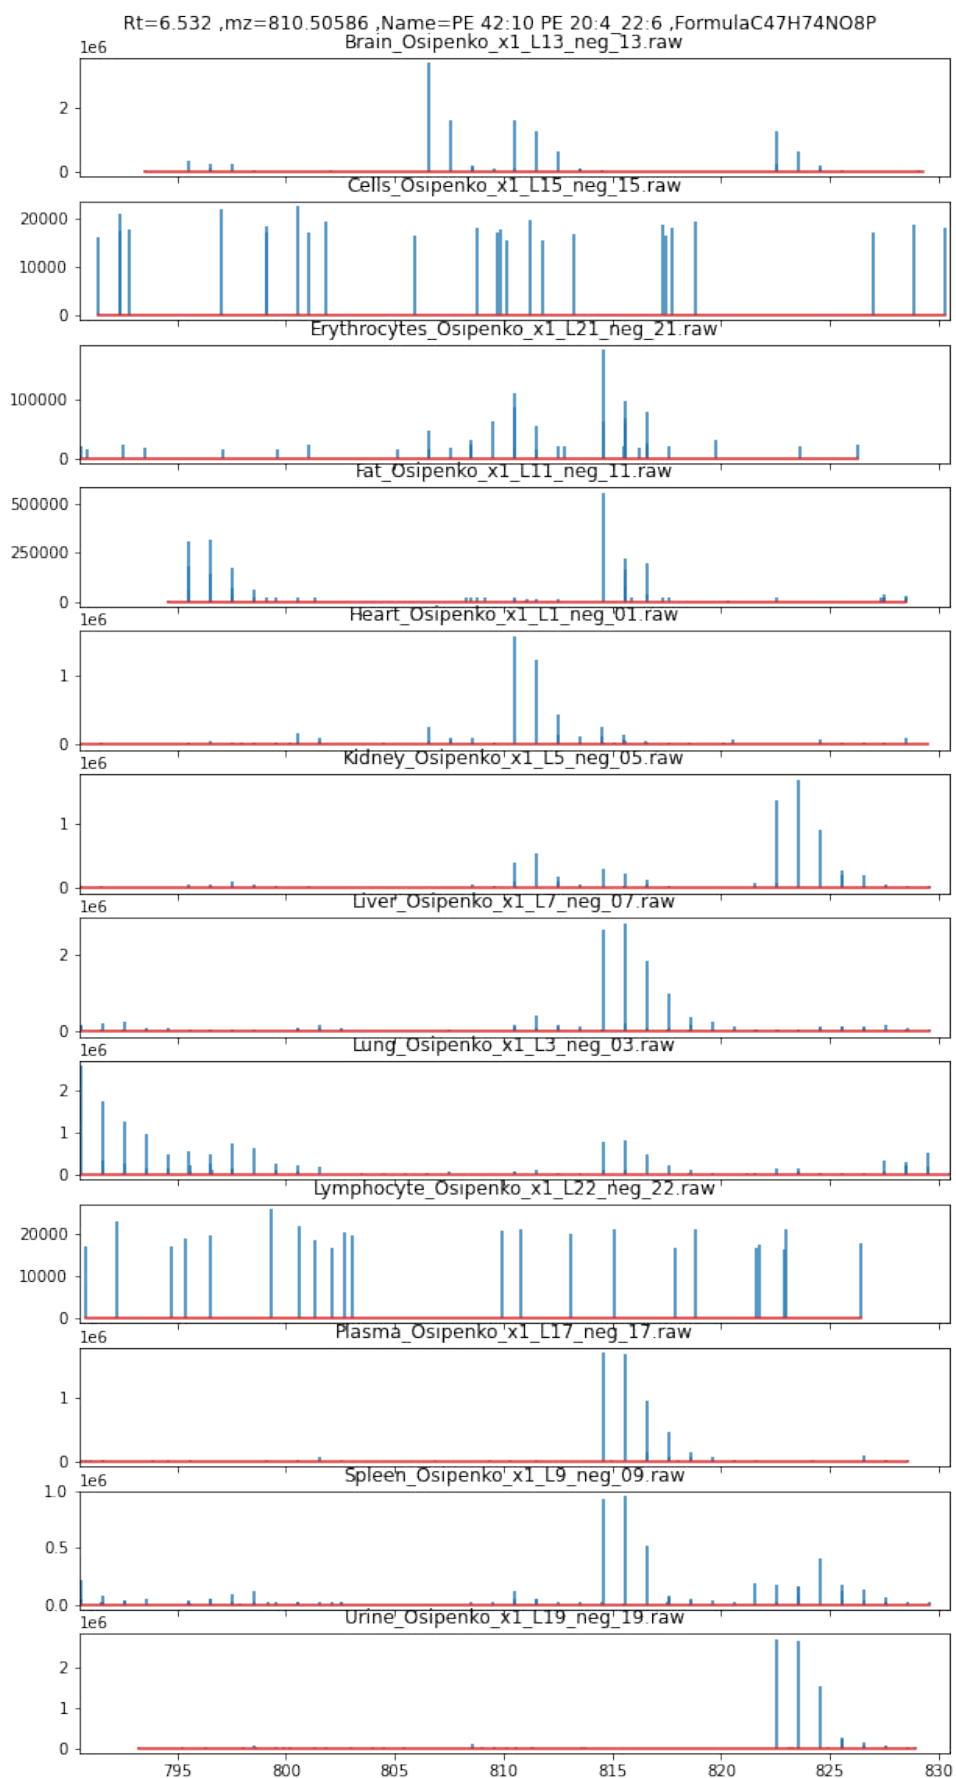

Rt=6.544 ,mz=822.54297 ,Name=PC O-36:6 PC O-14:0 22:6 ,FormulaC44H78NO7P  
Brain\_Osipenko\_x1\_L13\_neg\_13.raw

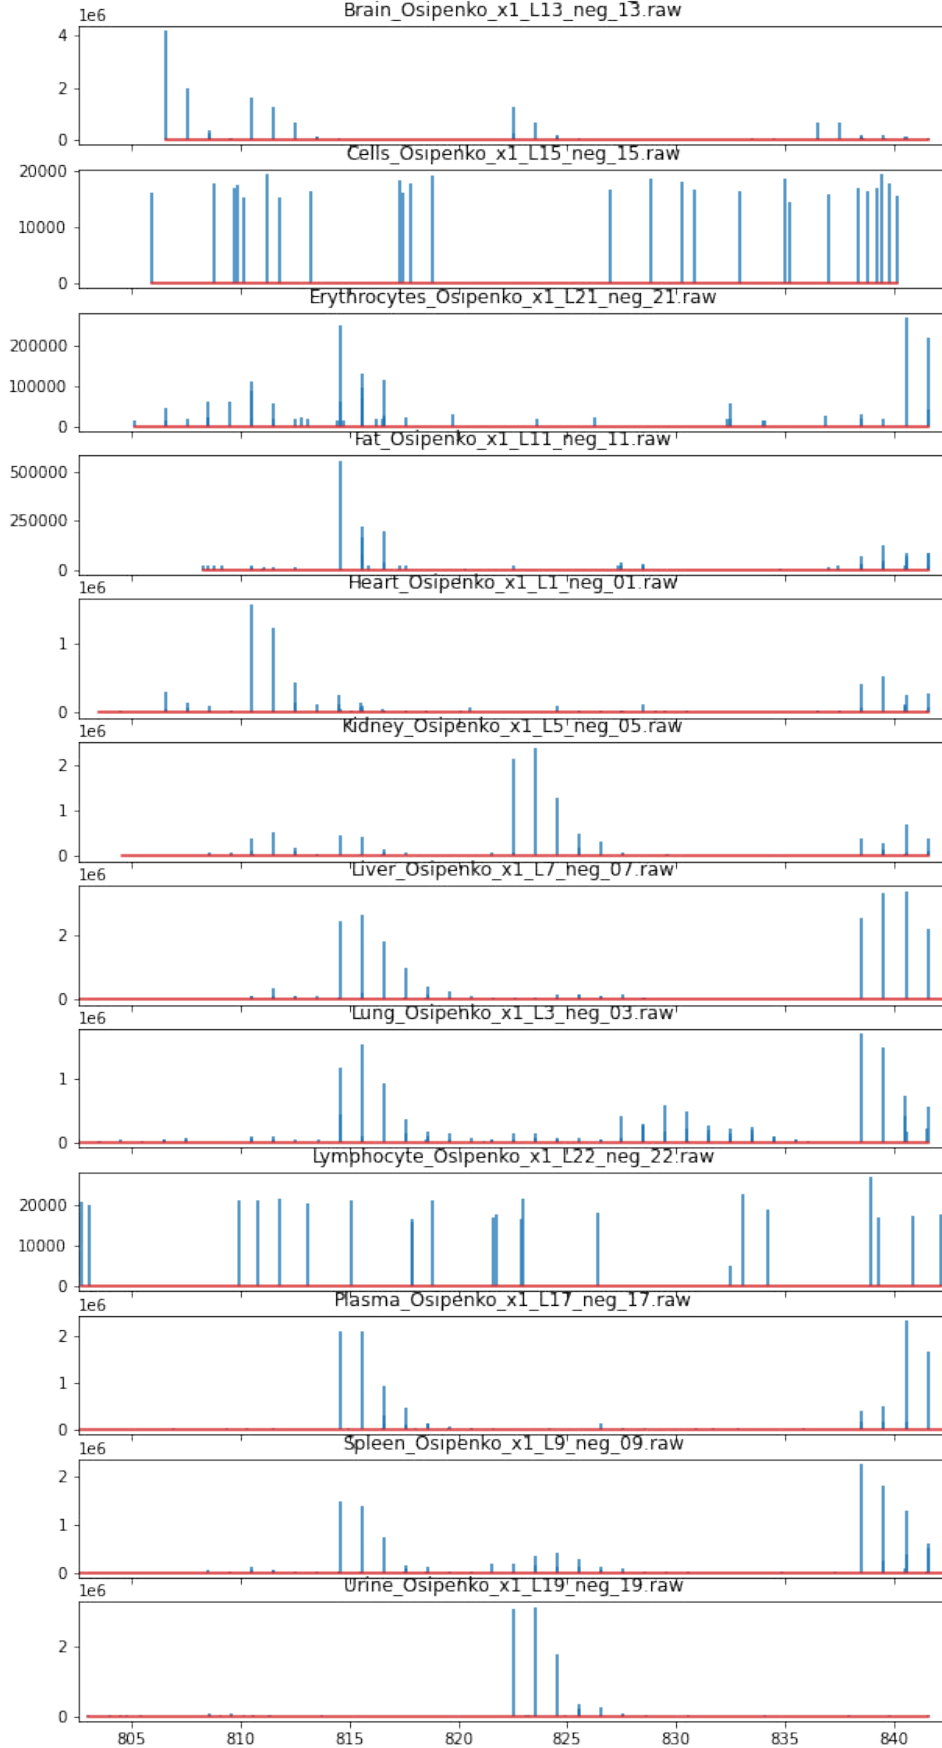

Rt=6.565 ,mz=760.49109 ,Name=PE 38:7 PE 16:1 22:6 ,FormulaC43H72NO8P  
Brain\_Osipenko\_x1\_L13\_neg\_13.raw

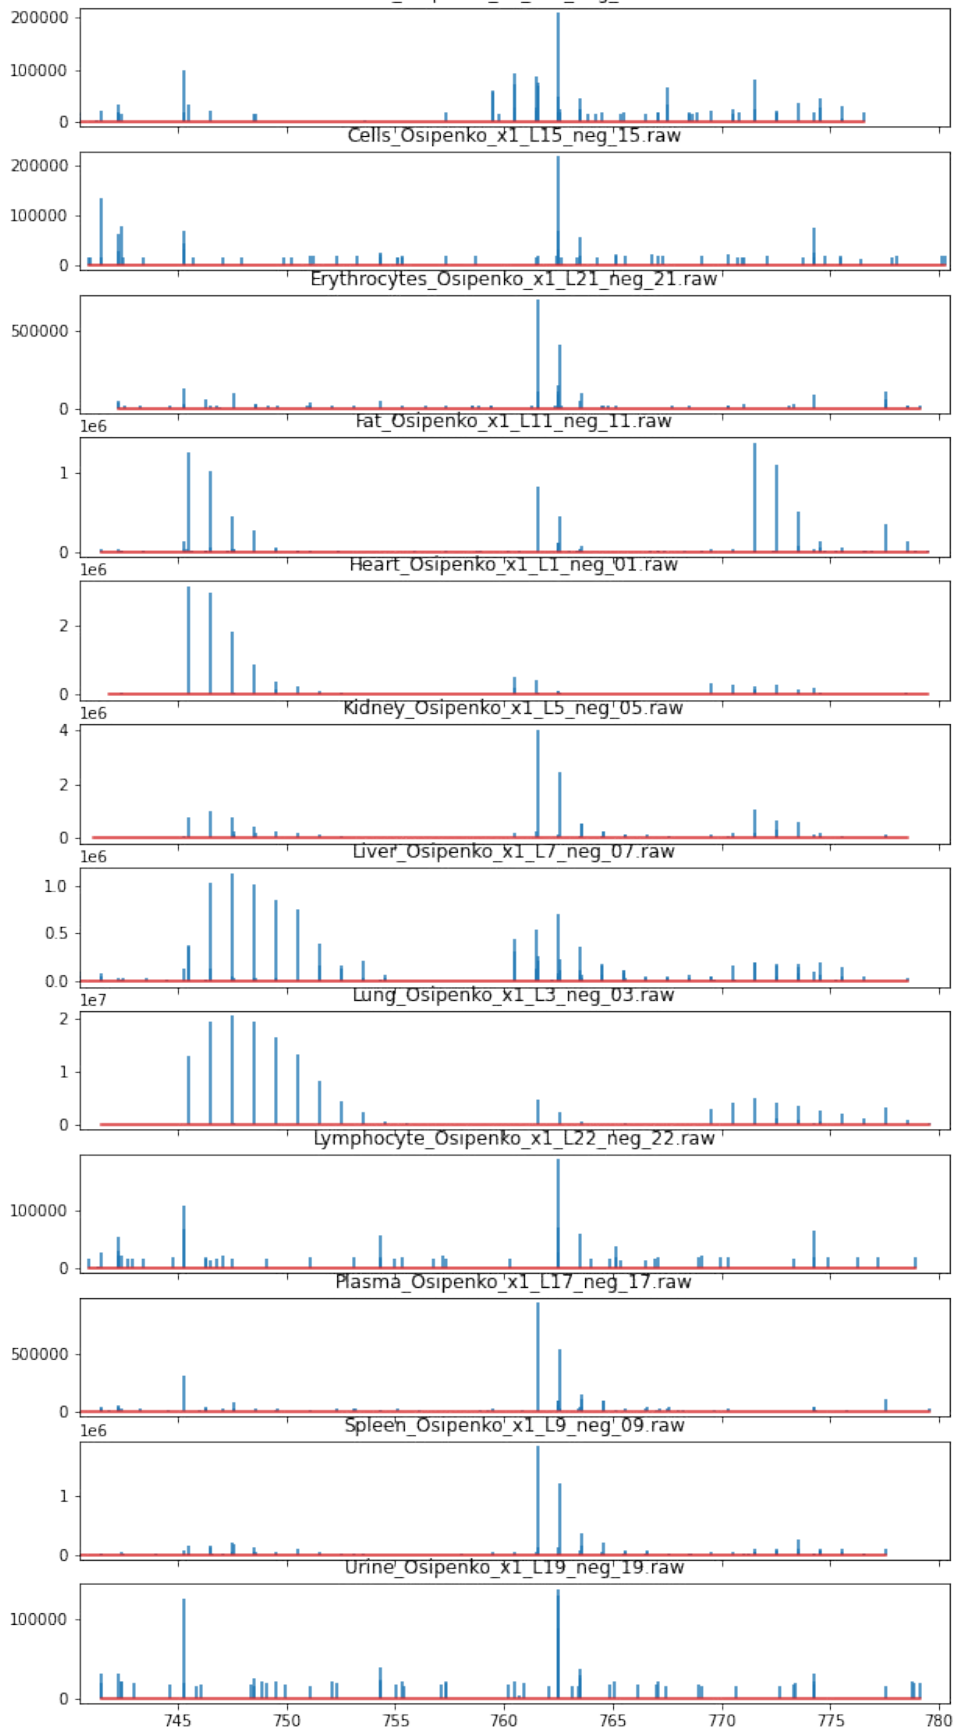

Rt=6.598 ,mz=838.56329 ,Name=PC 36:5 PC 16:1 20:4 ,FormulaC44H78NO8P  
Brain\_Osipenko\_x1\_L13\_neg\_13.raw

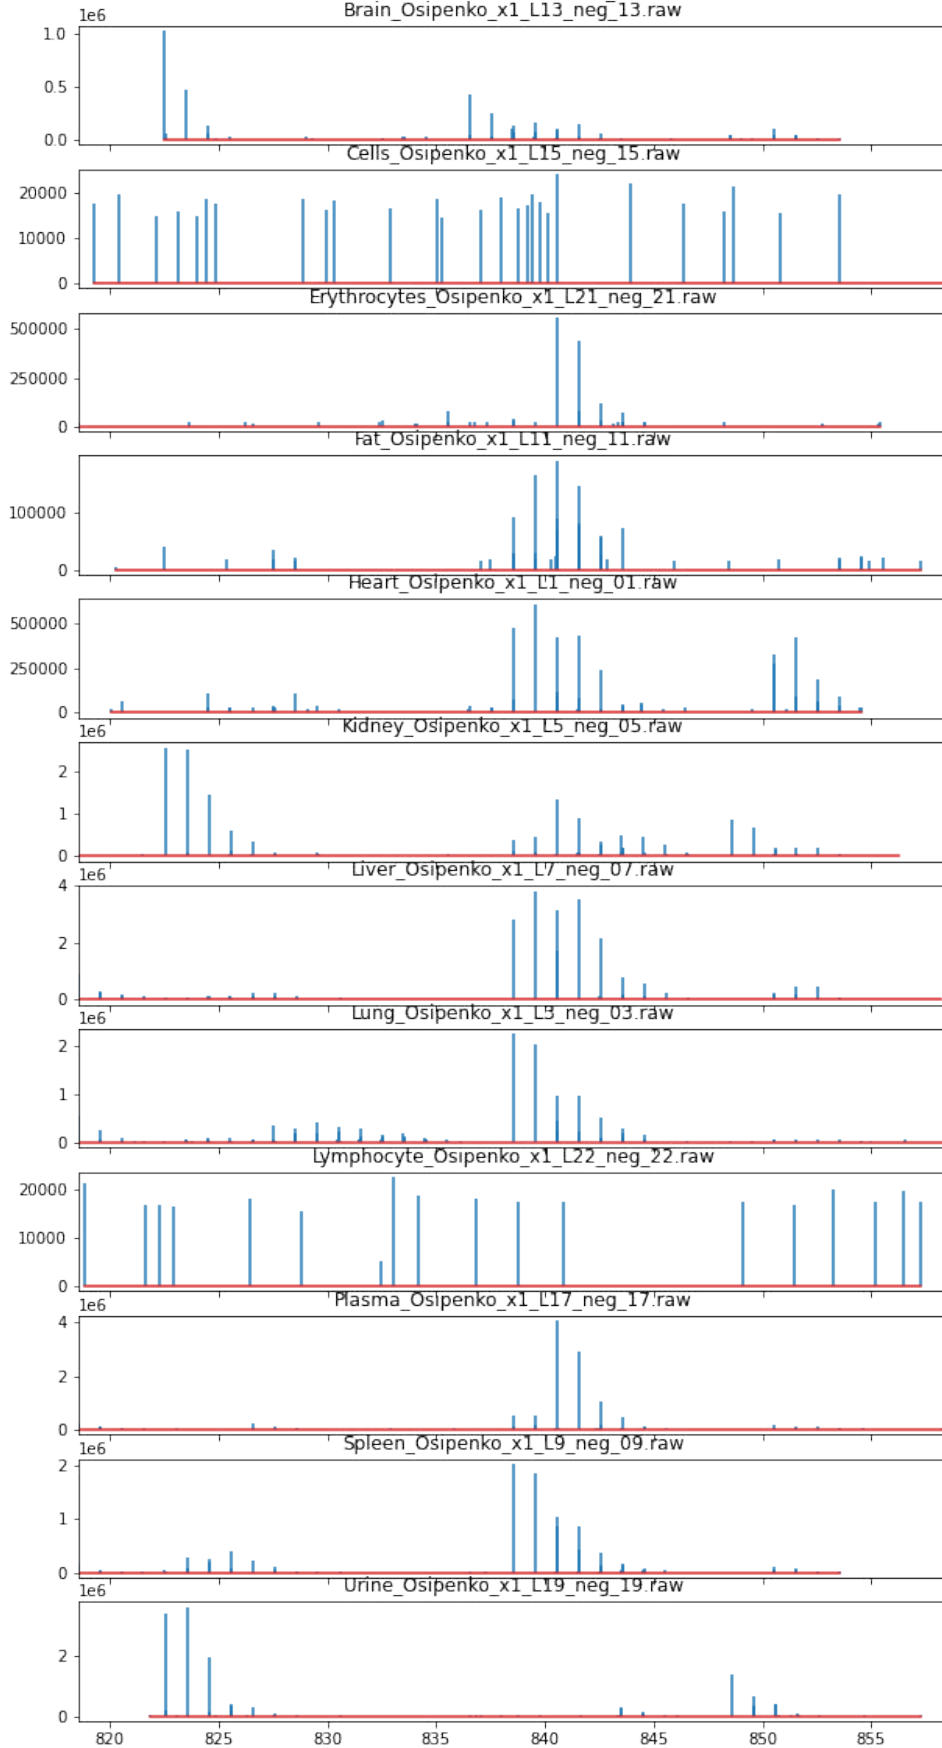

Rt=6.598 ,mz=838.56329 ,Name=PC 36:5 PC 16:1 20:4 ,FormulaC44H78NO8P  
Brain\_Osipenko\_x1\_L13\_neg\_13.raw



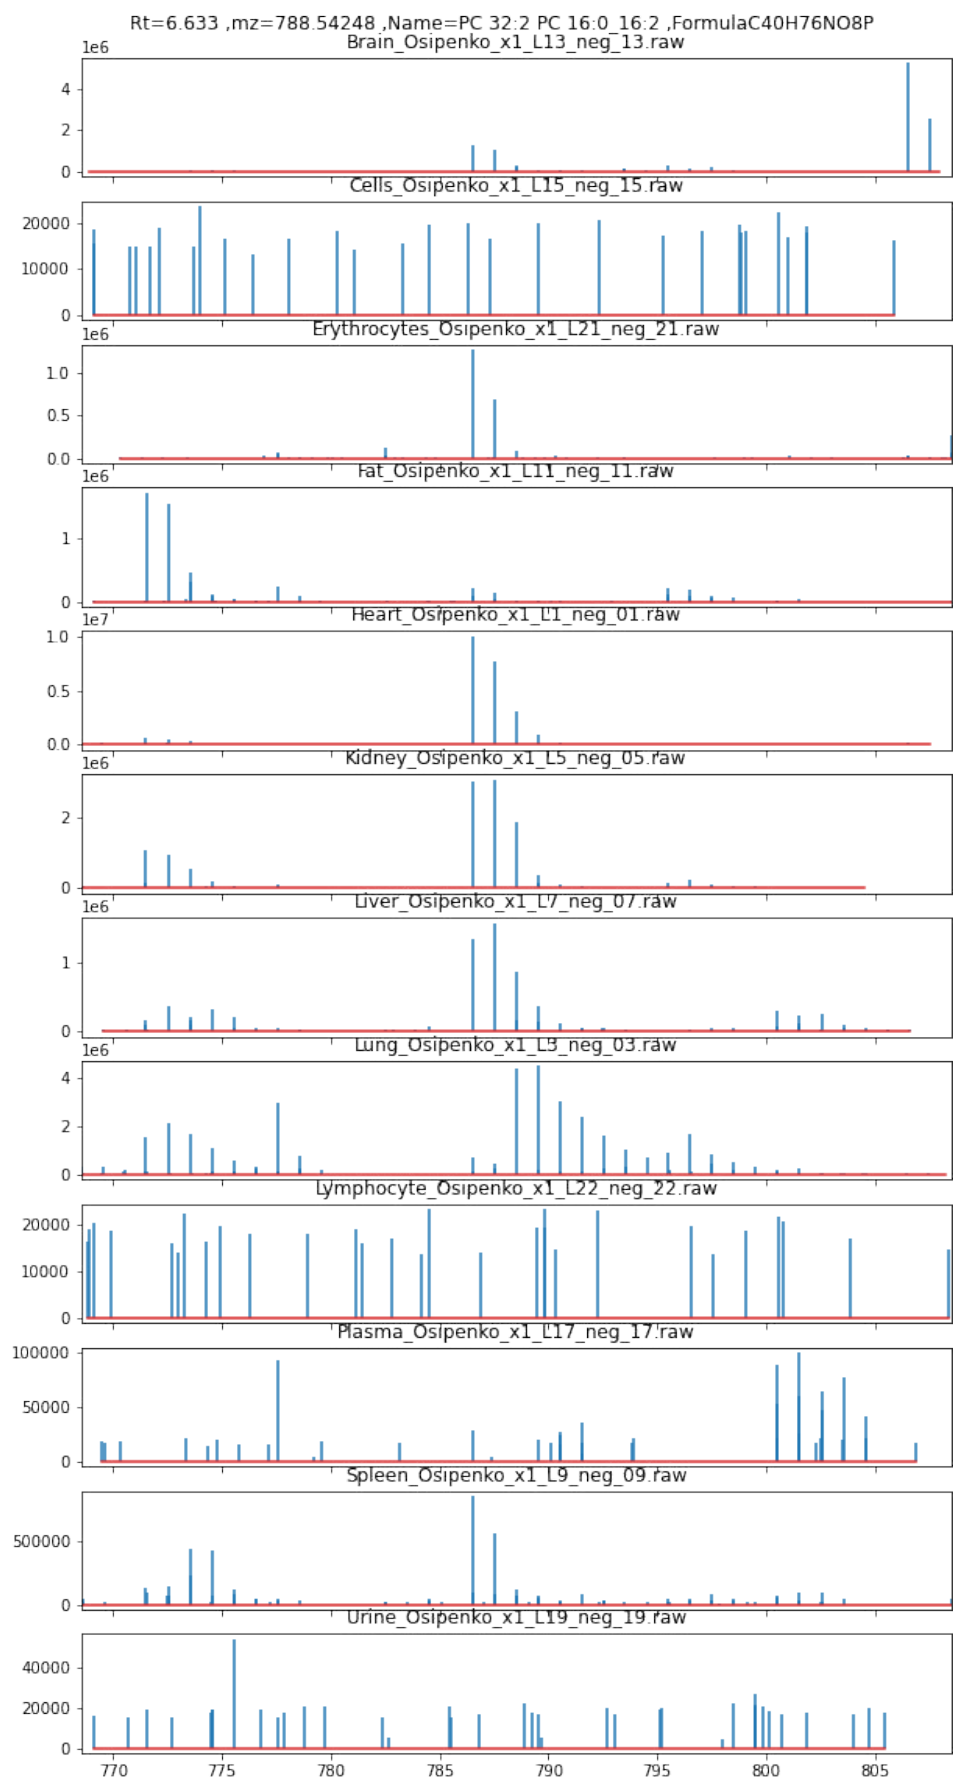

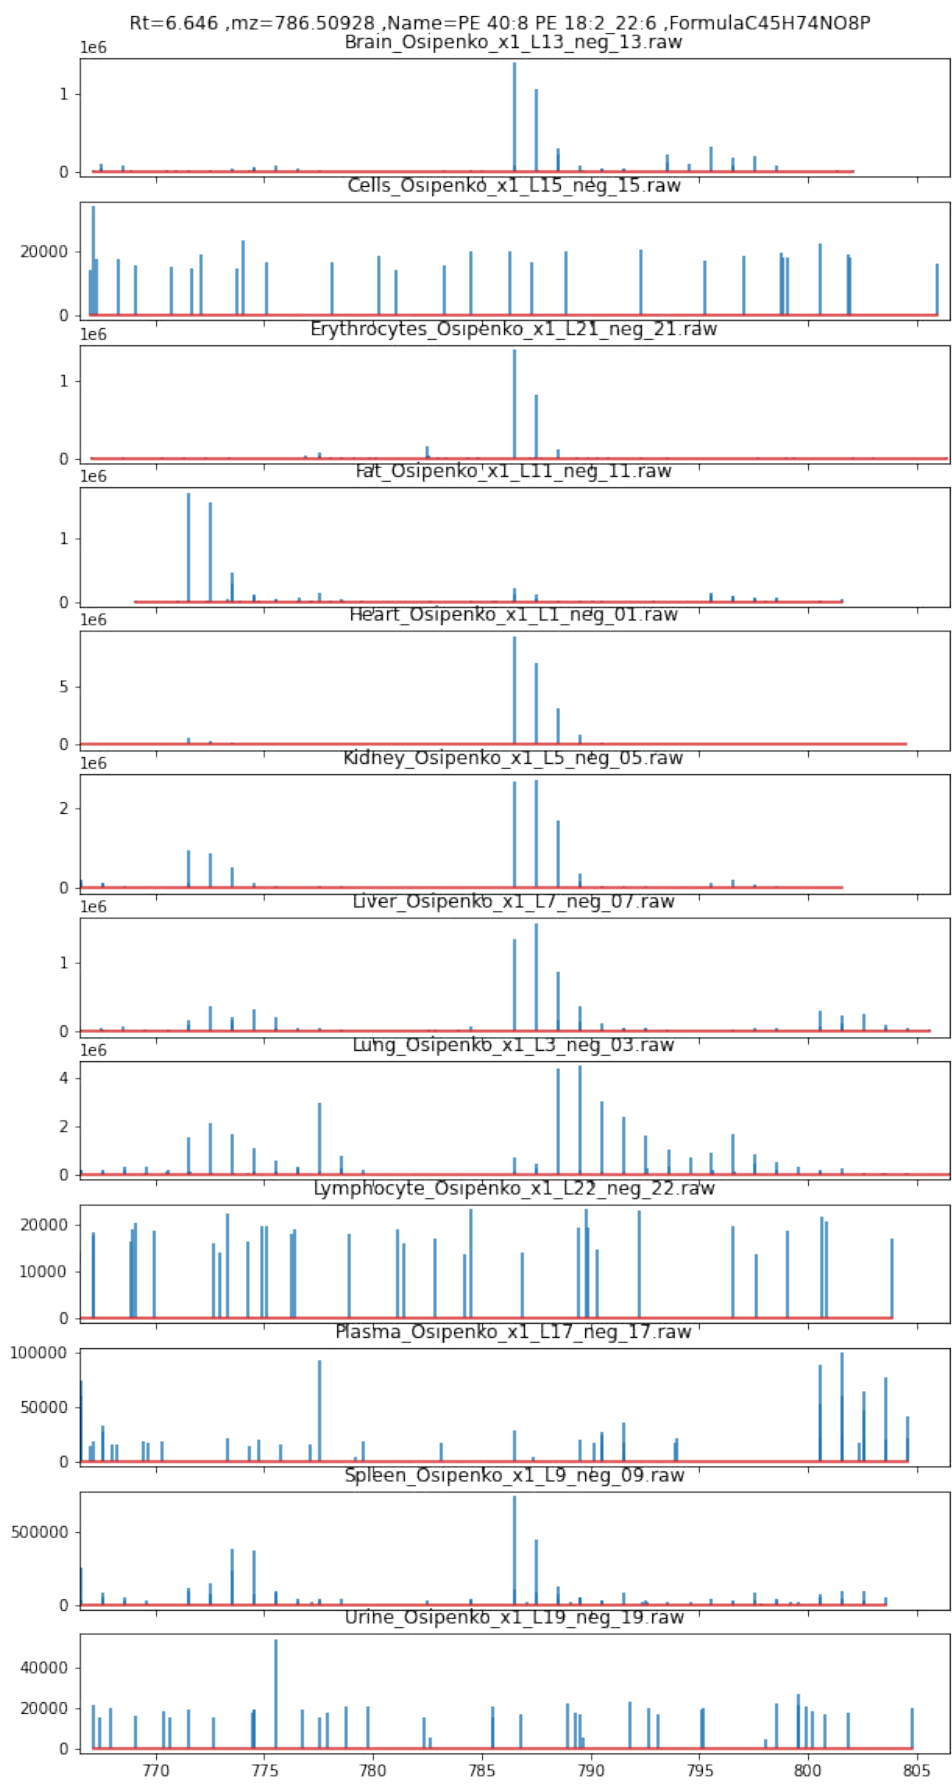

Rt=6.655 ,mz=814.55896 ,Name=PE O-43:8 PE O-21:2 22:6 ,FormulaC48H82NO7P  
Brain\_Osipenko\_x1\_L13\_neg\_13.raw

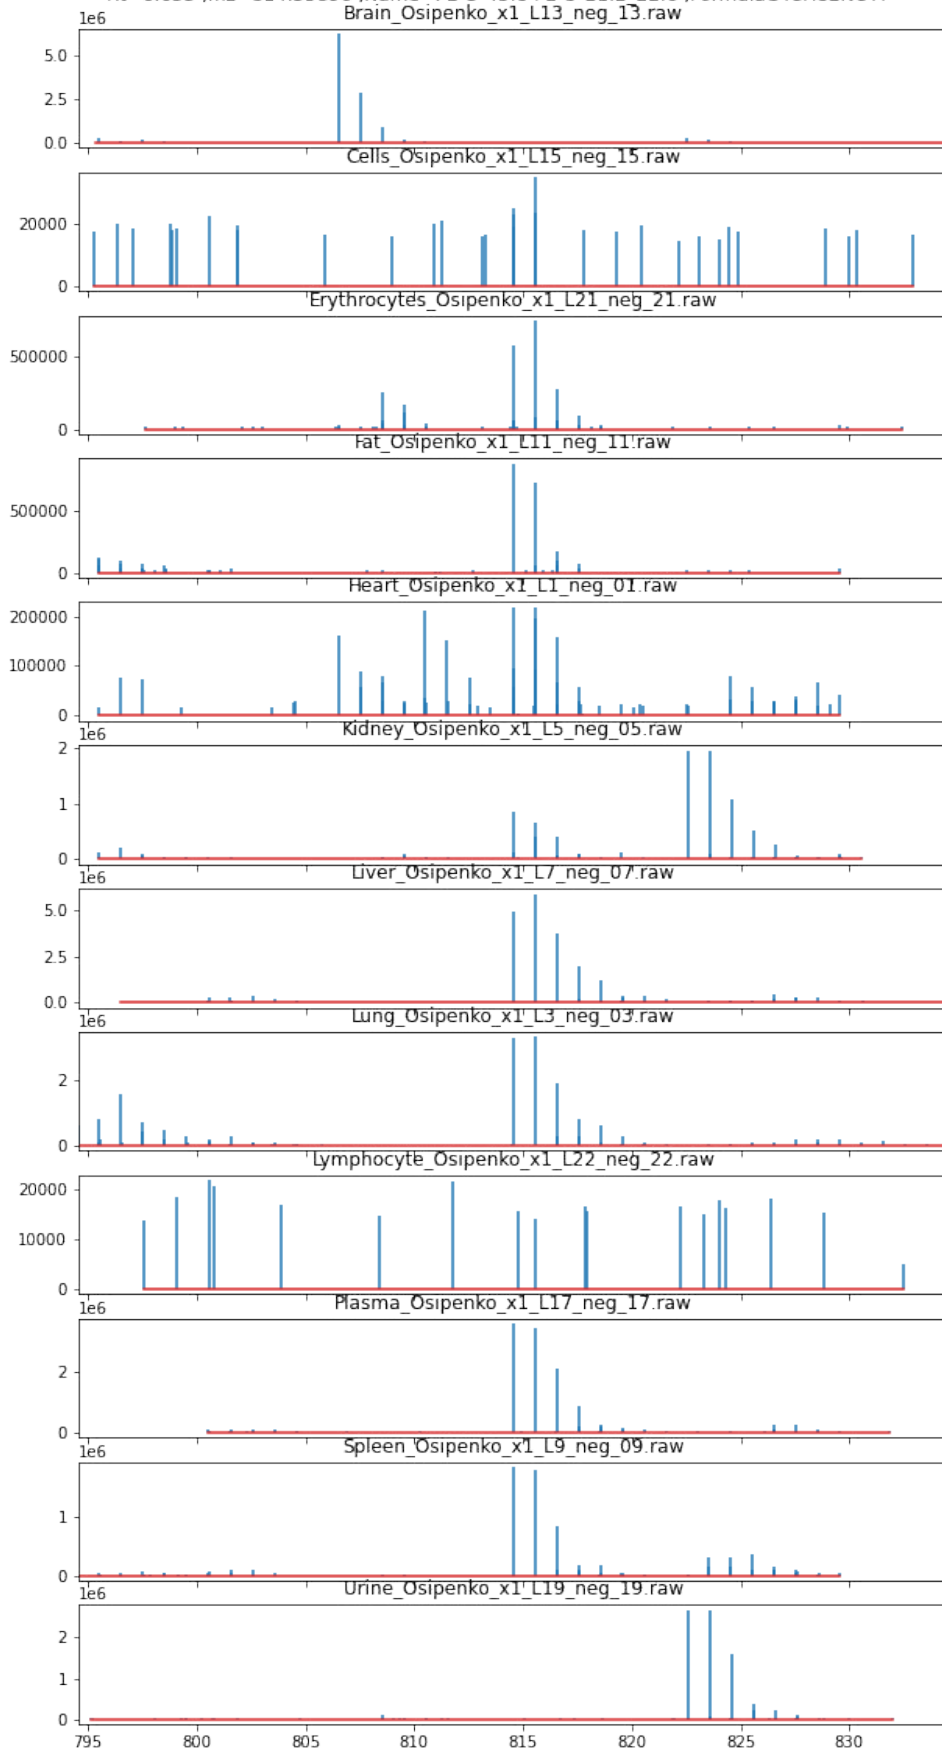



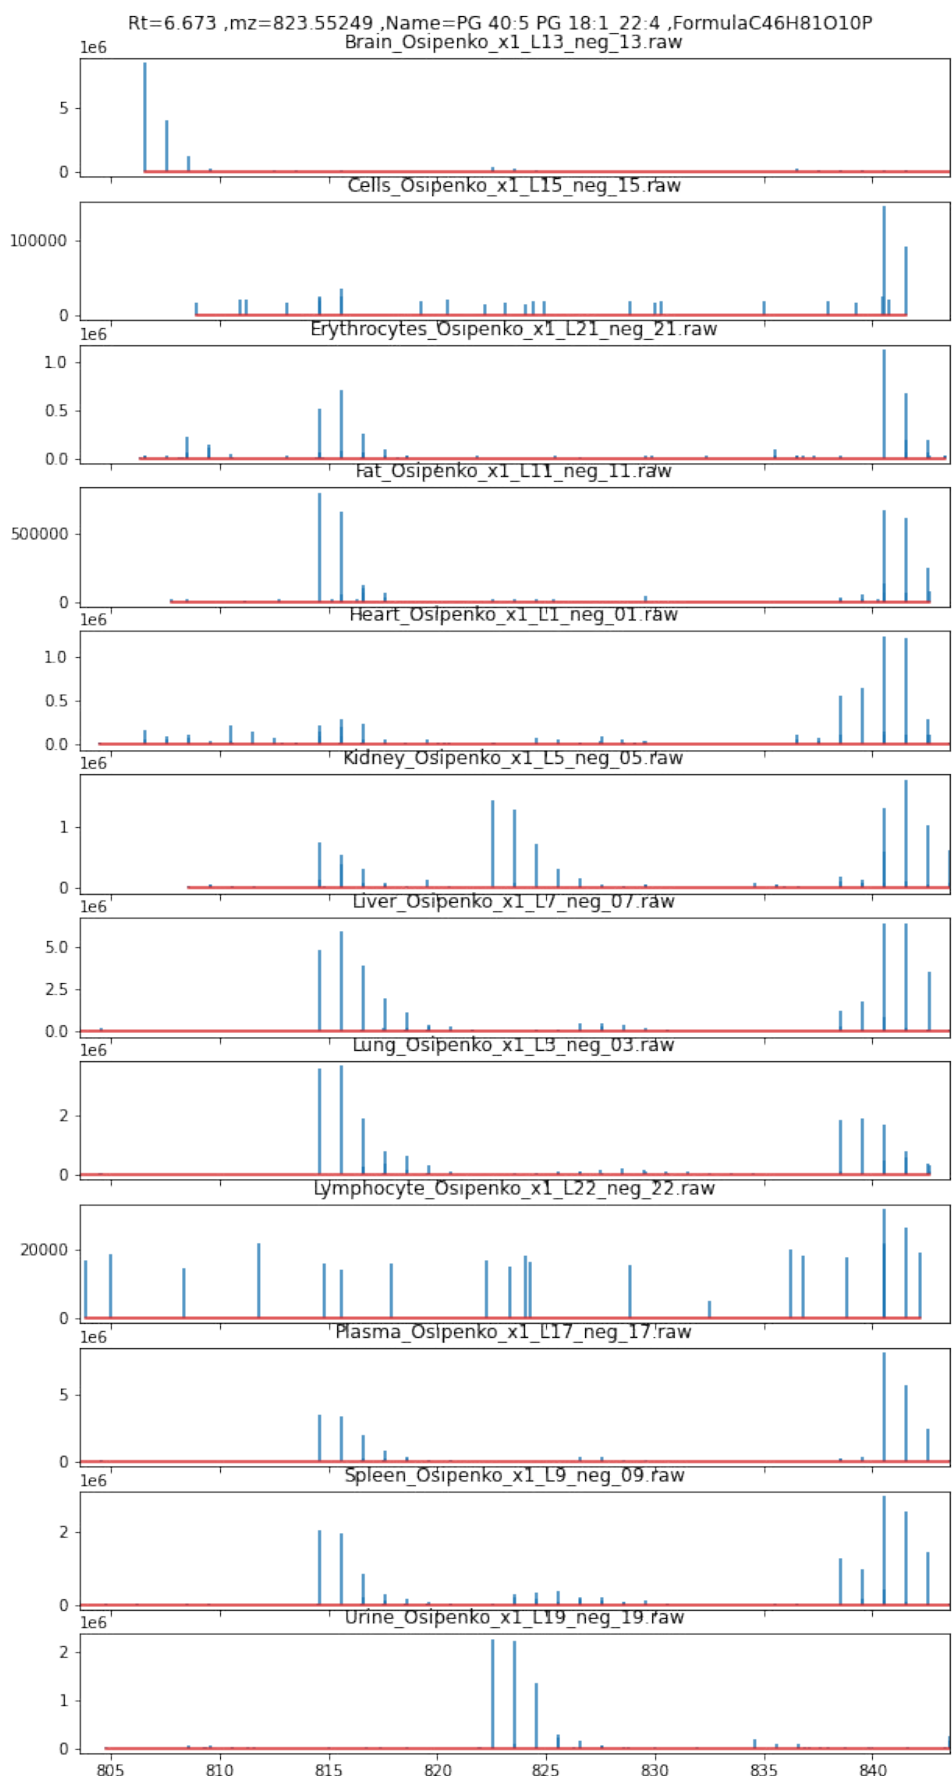

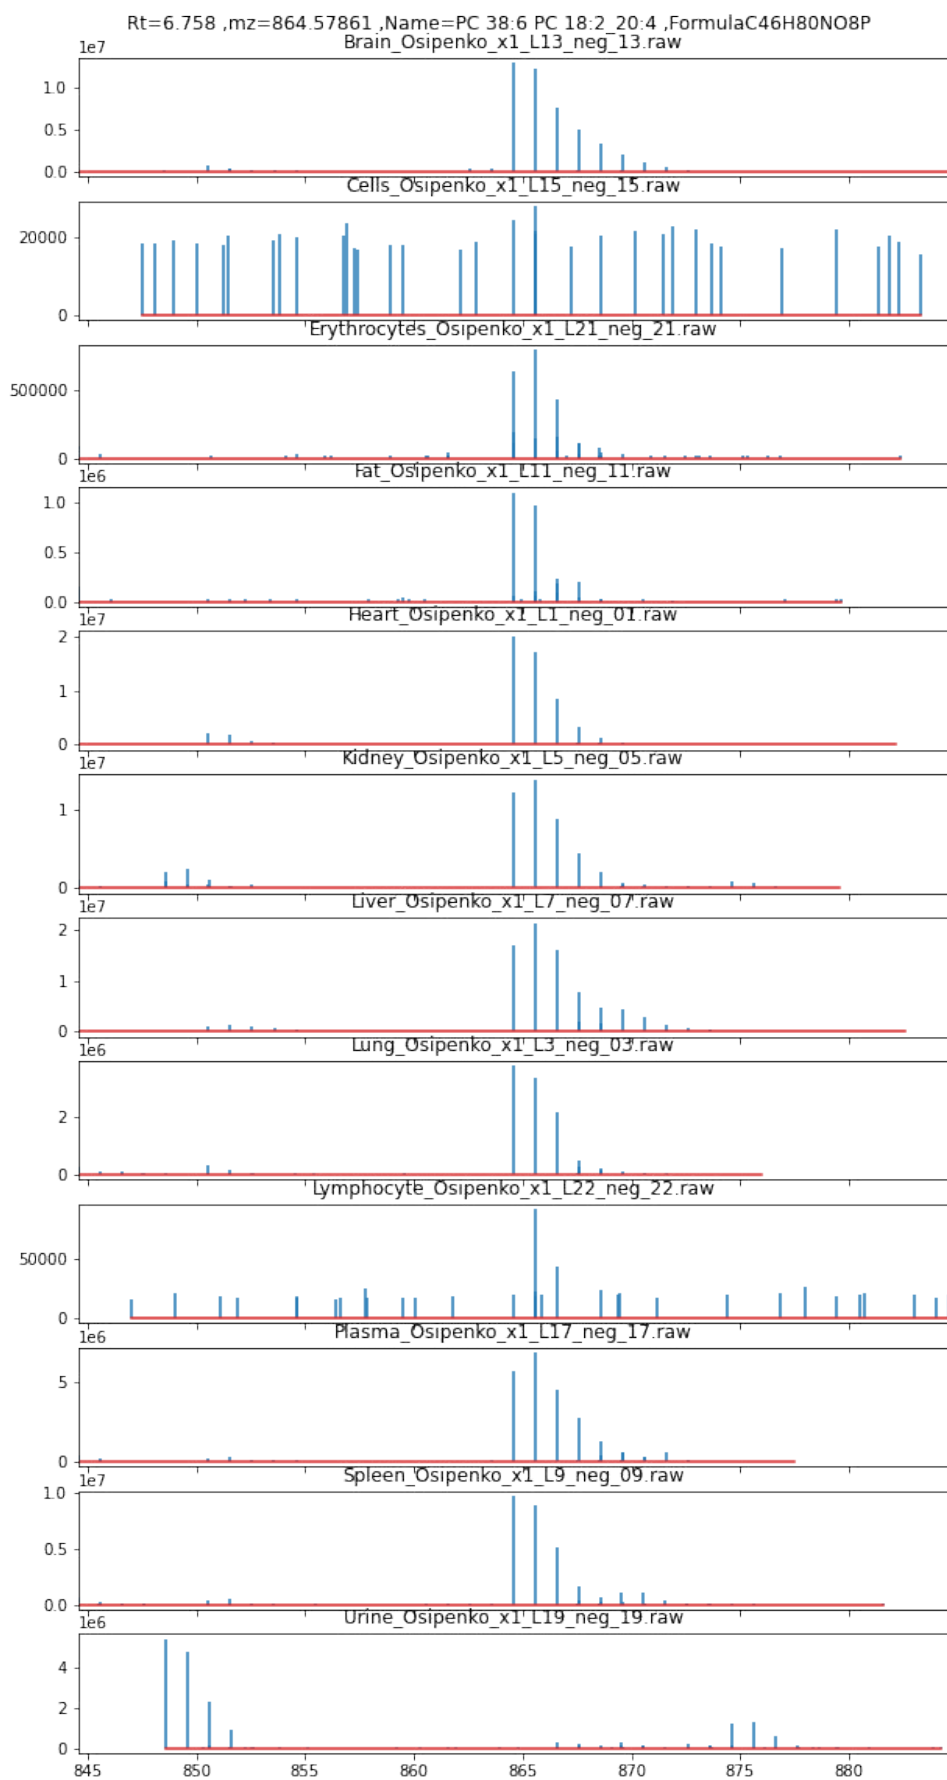

Rt=6.795 ,mz=415.35858 ,Name=FA 28:4 ,FormulaC28H48O2  
Brain\_Osipenko\_x1\_L13\_neg\_13.raw

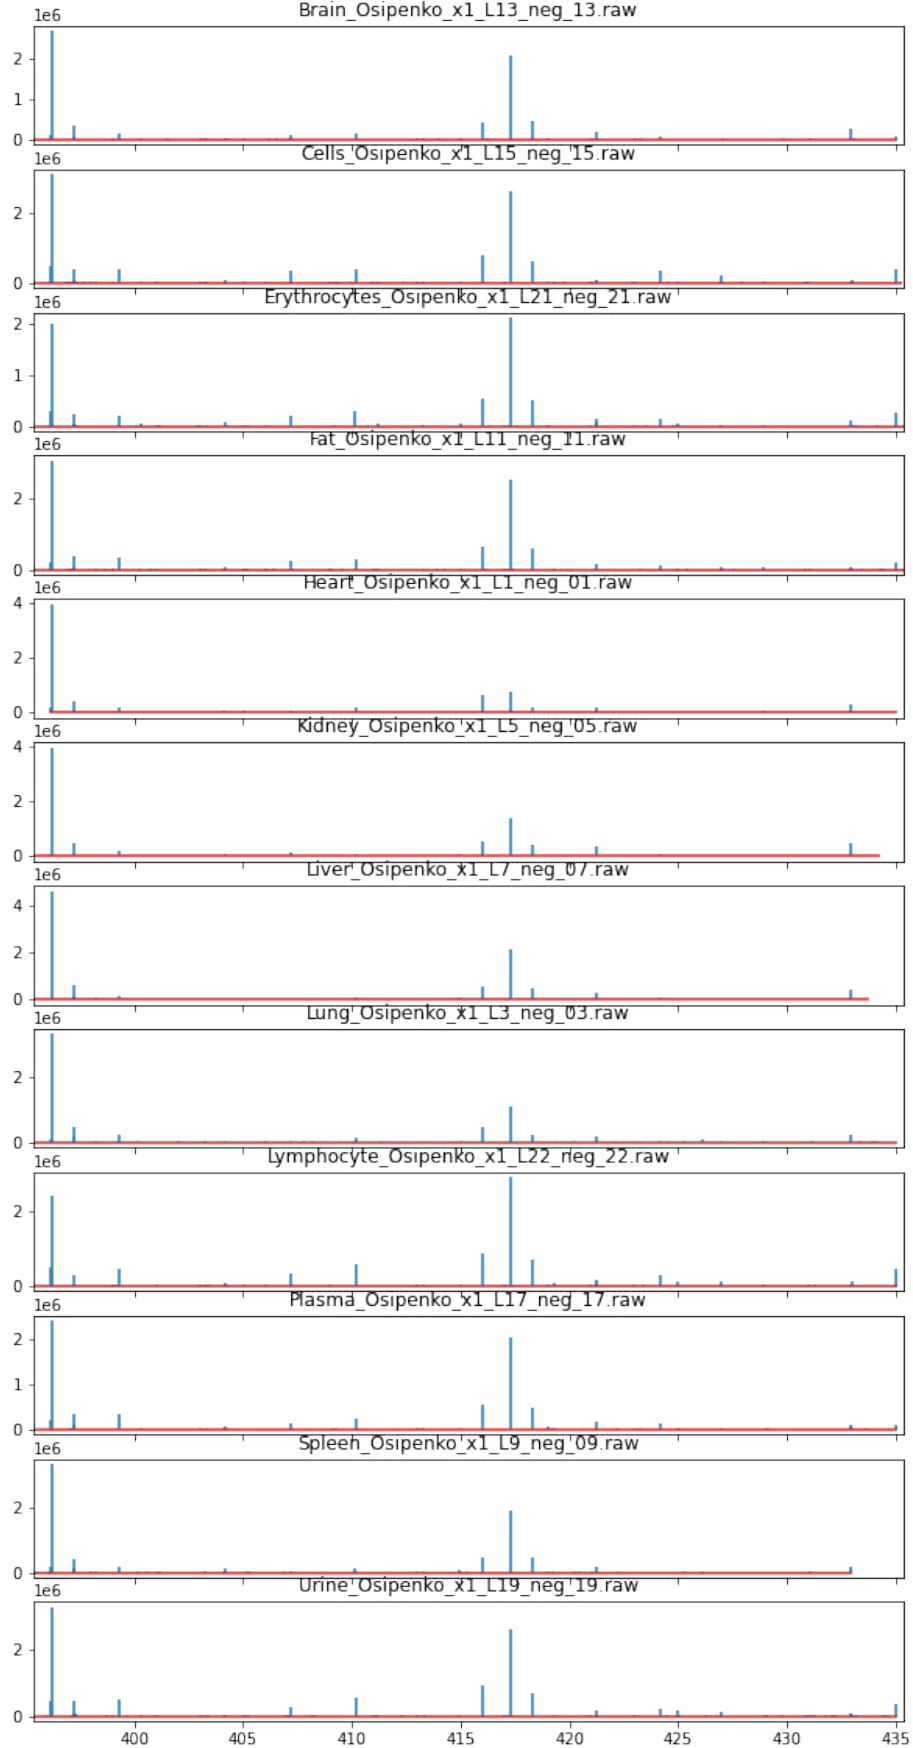

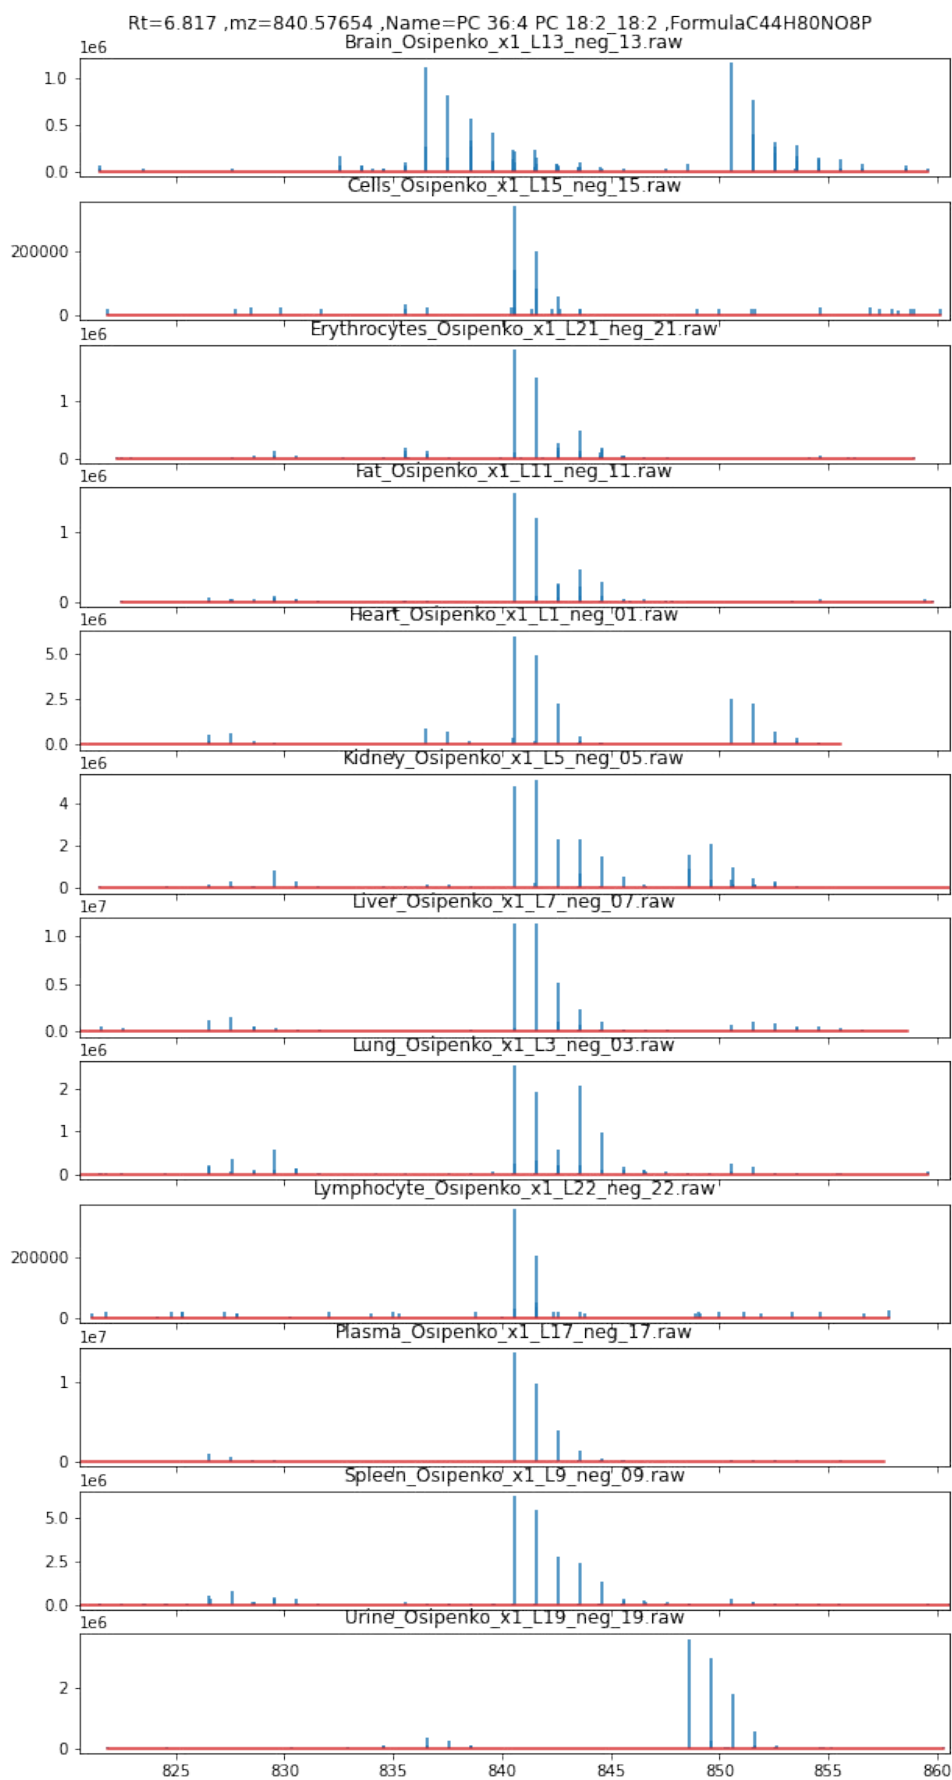

Rt=6.851 ,mz=761.58063 ,Name=SM 34:1 O2 SM 18:1 O2 16:0 ,FormulaC39H79N2O6P

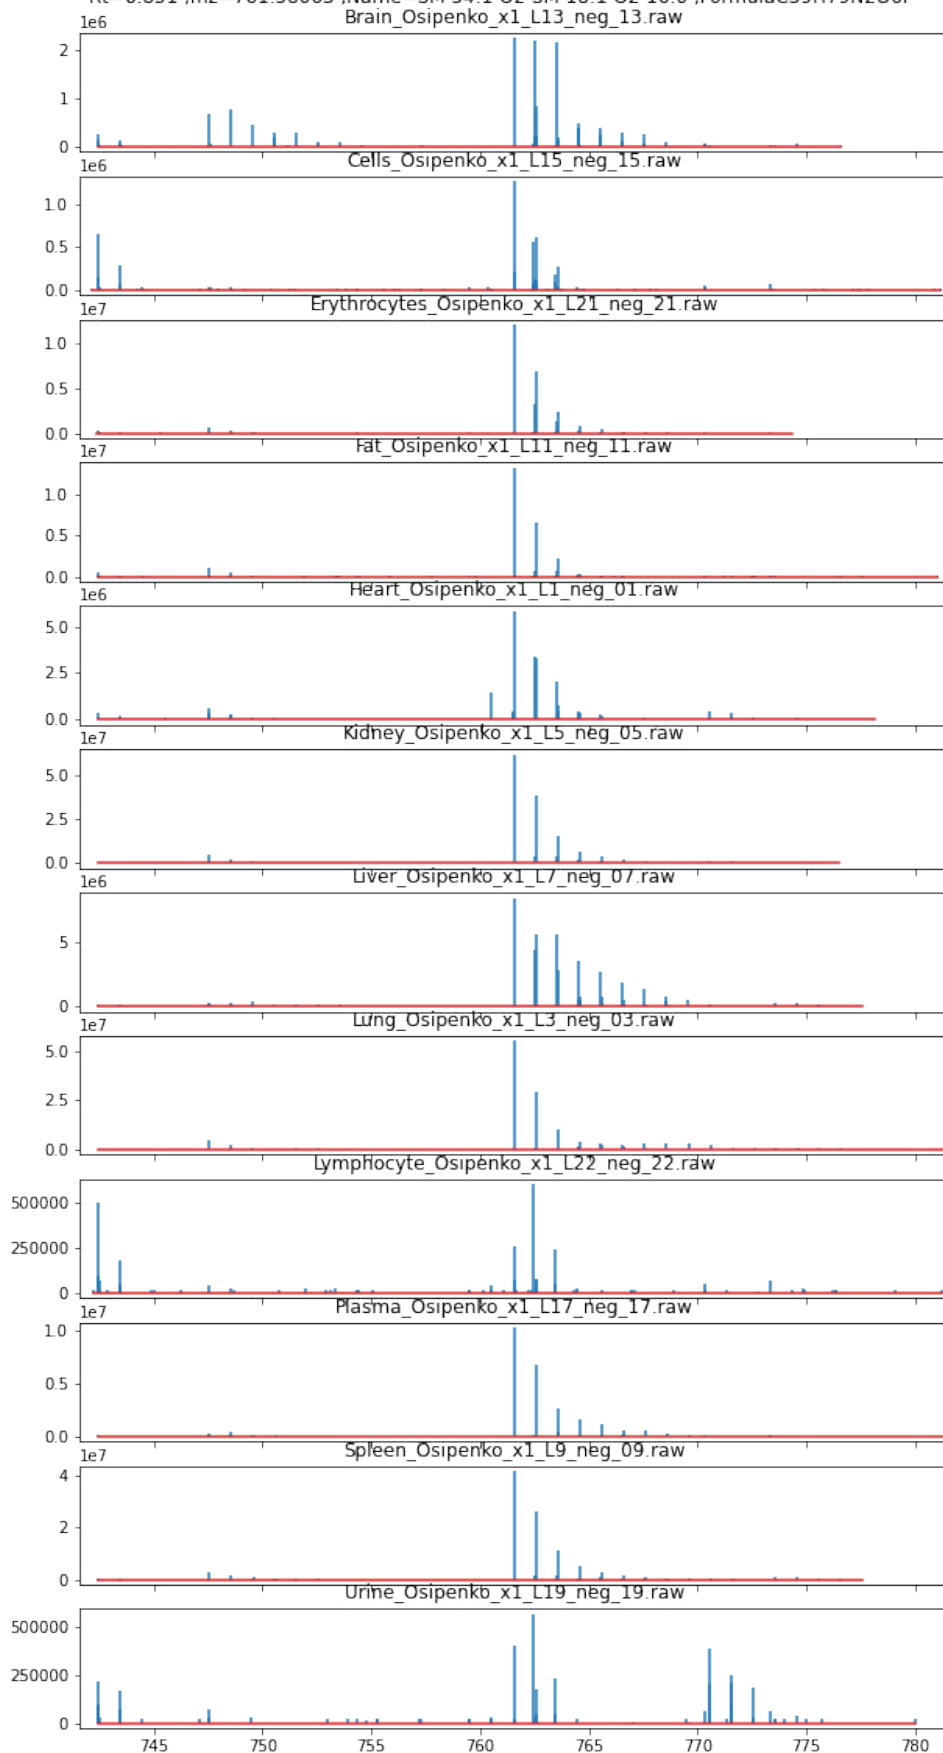

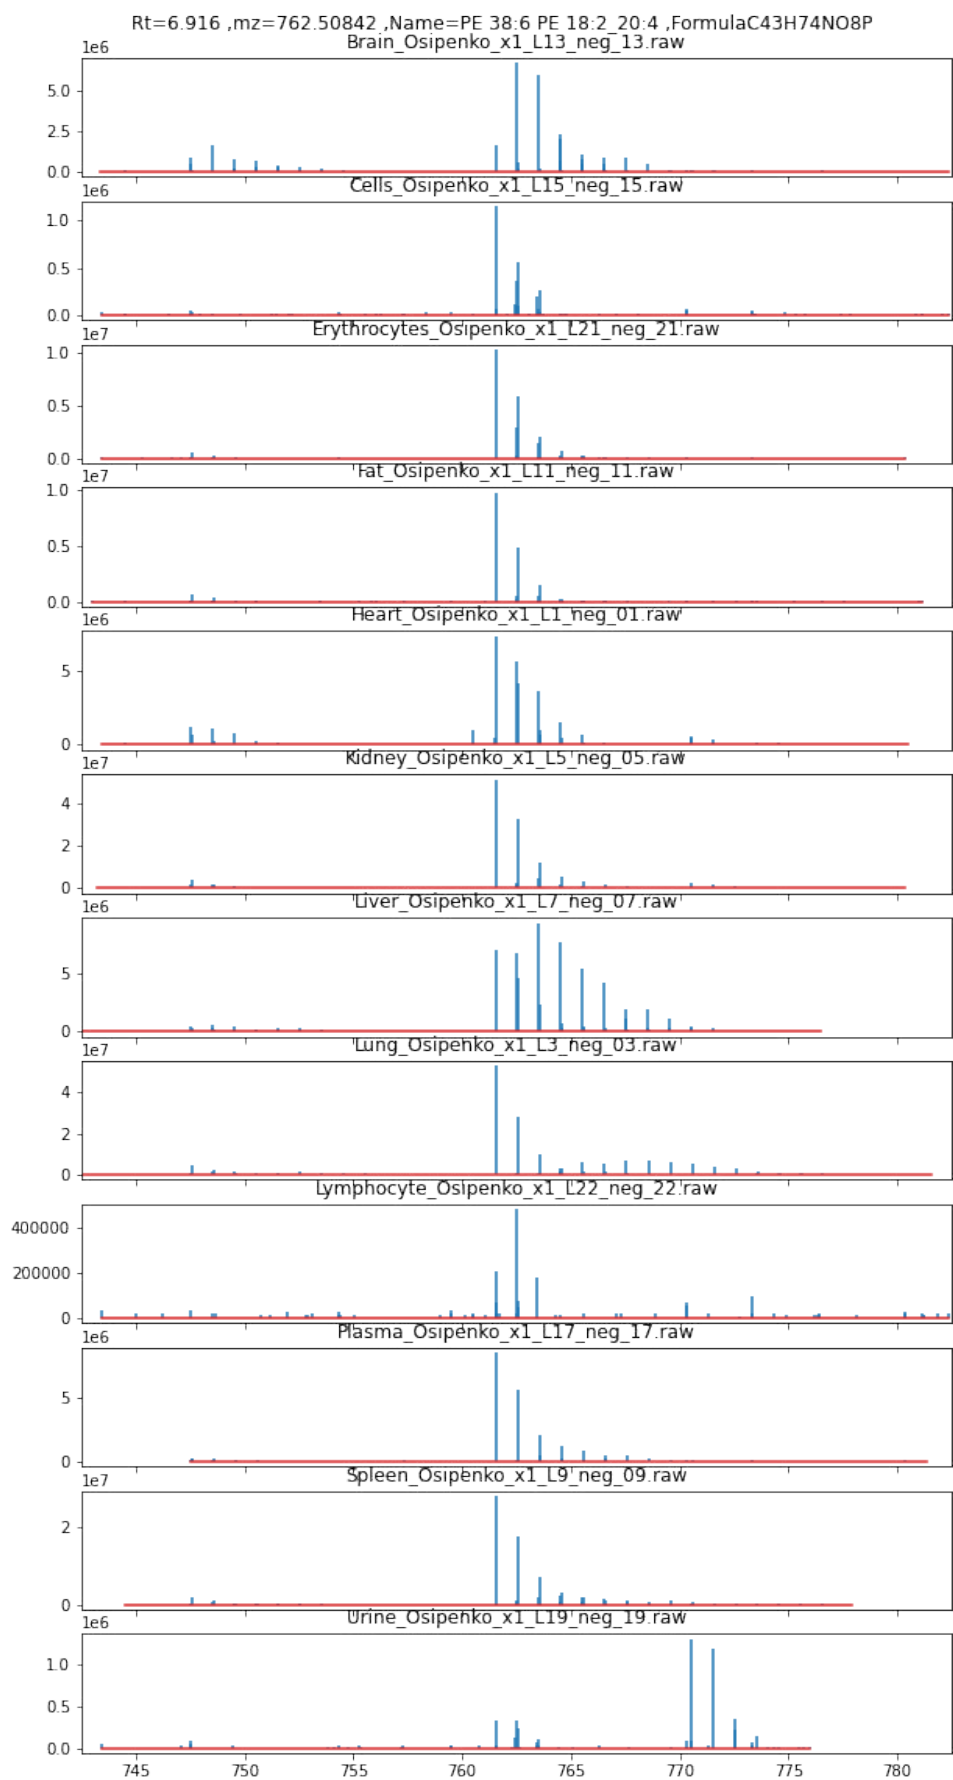

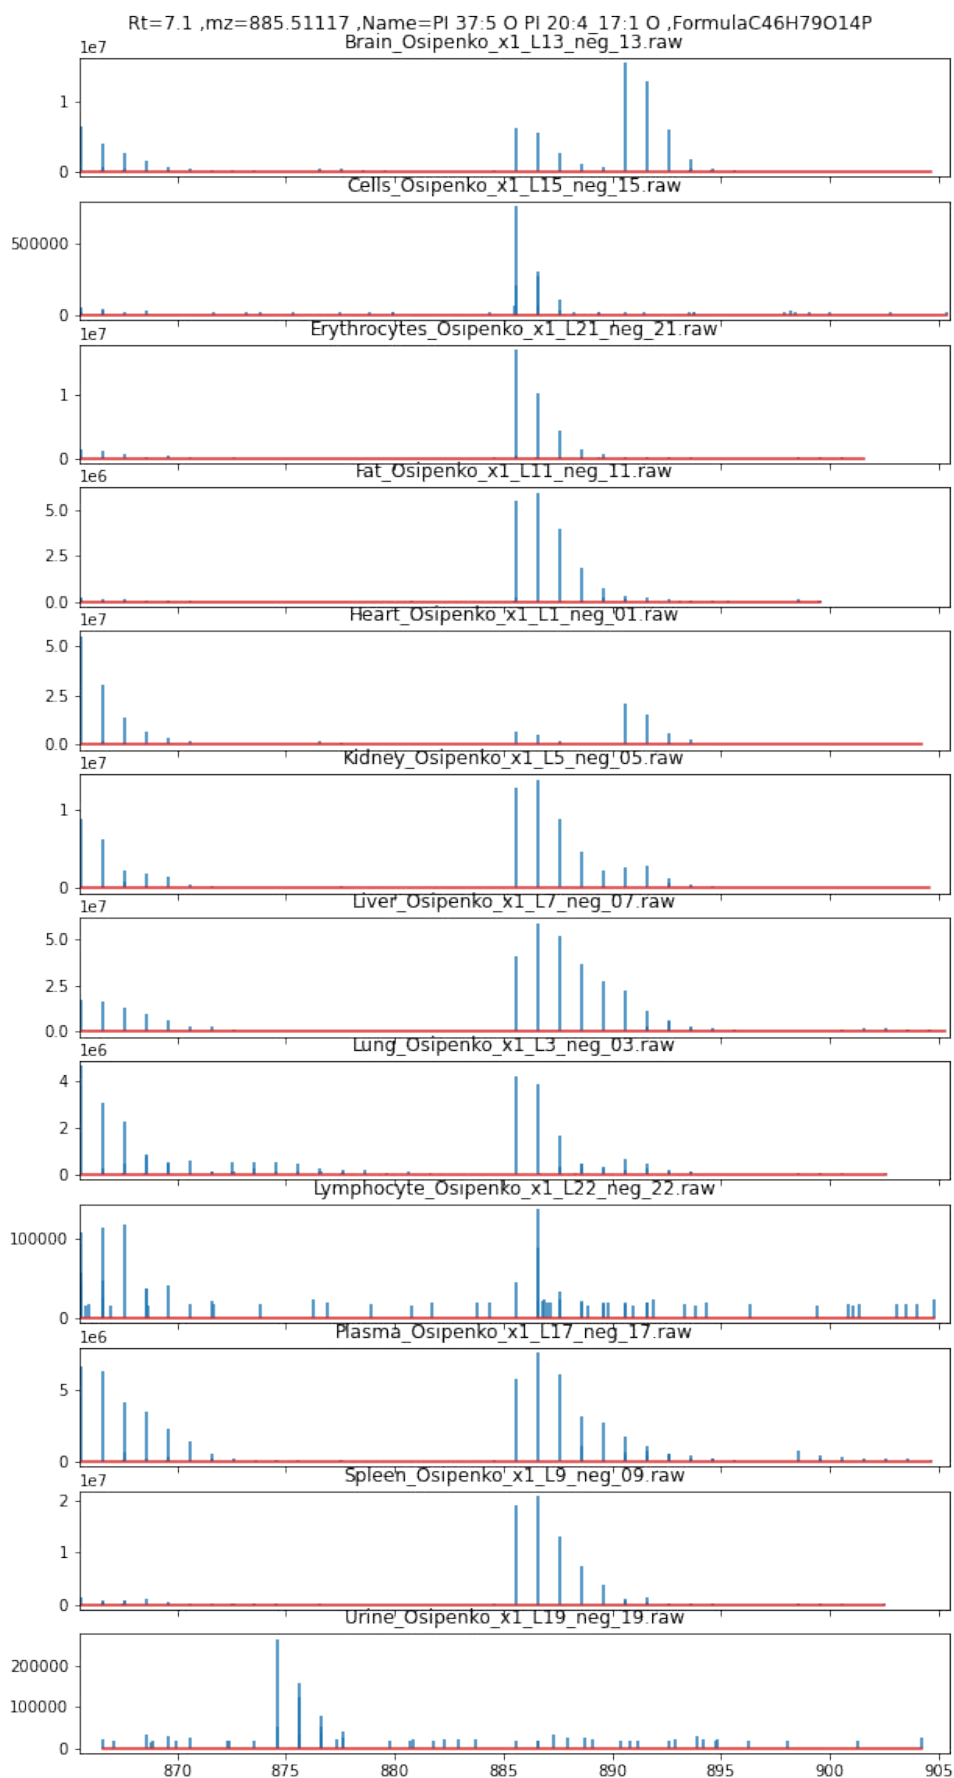

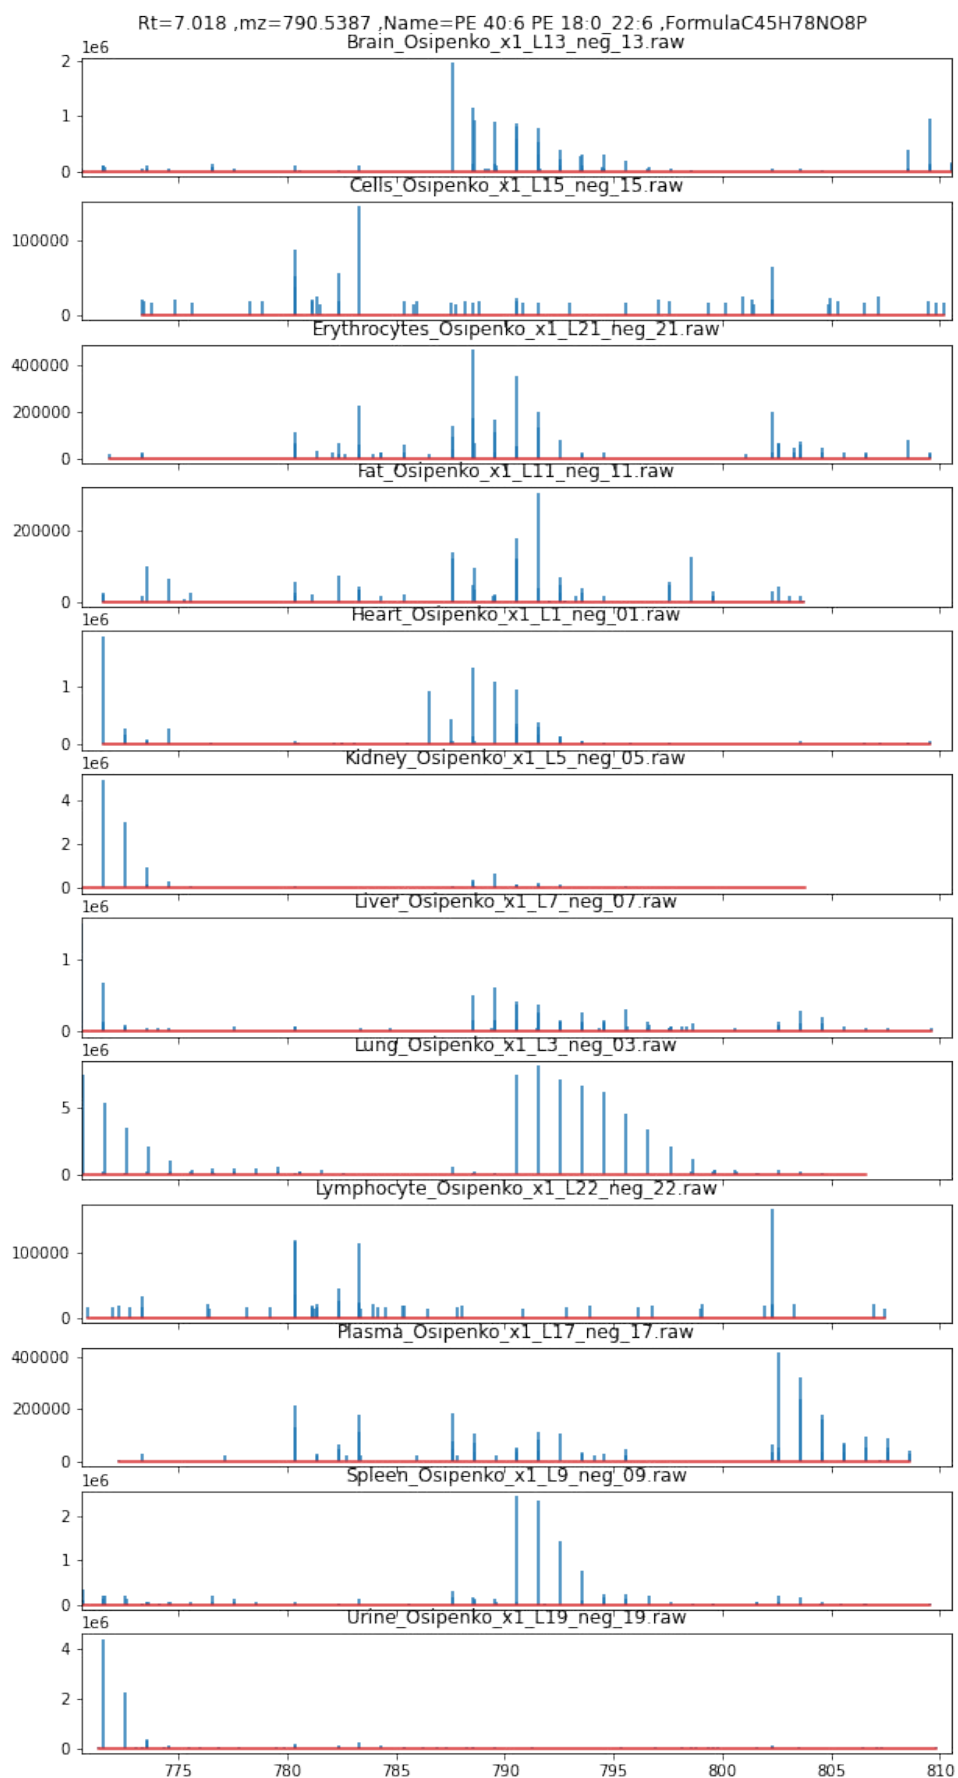



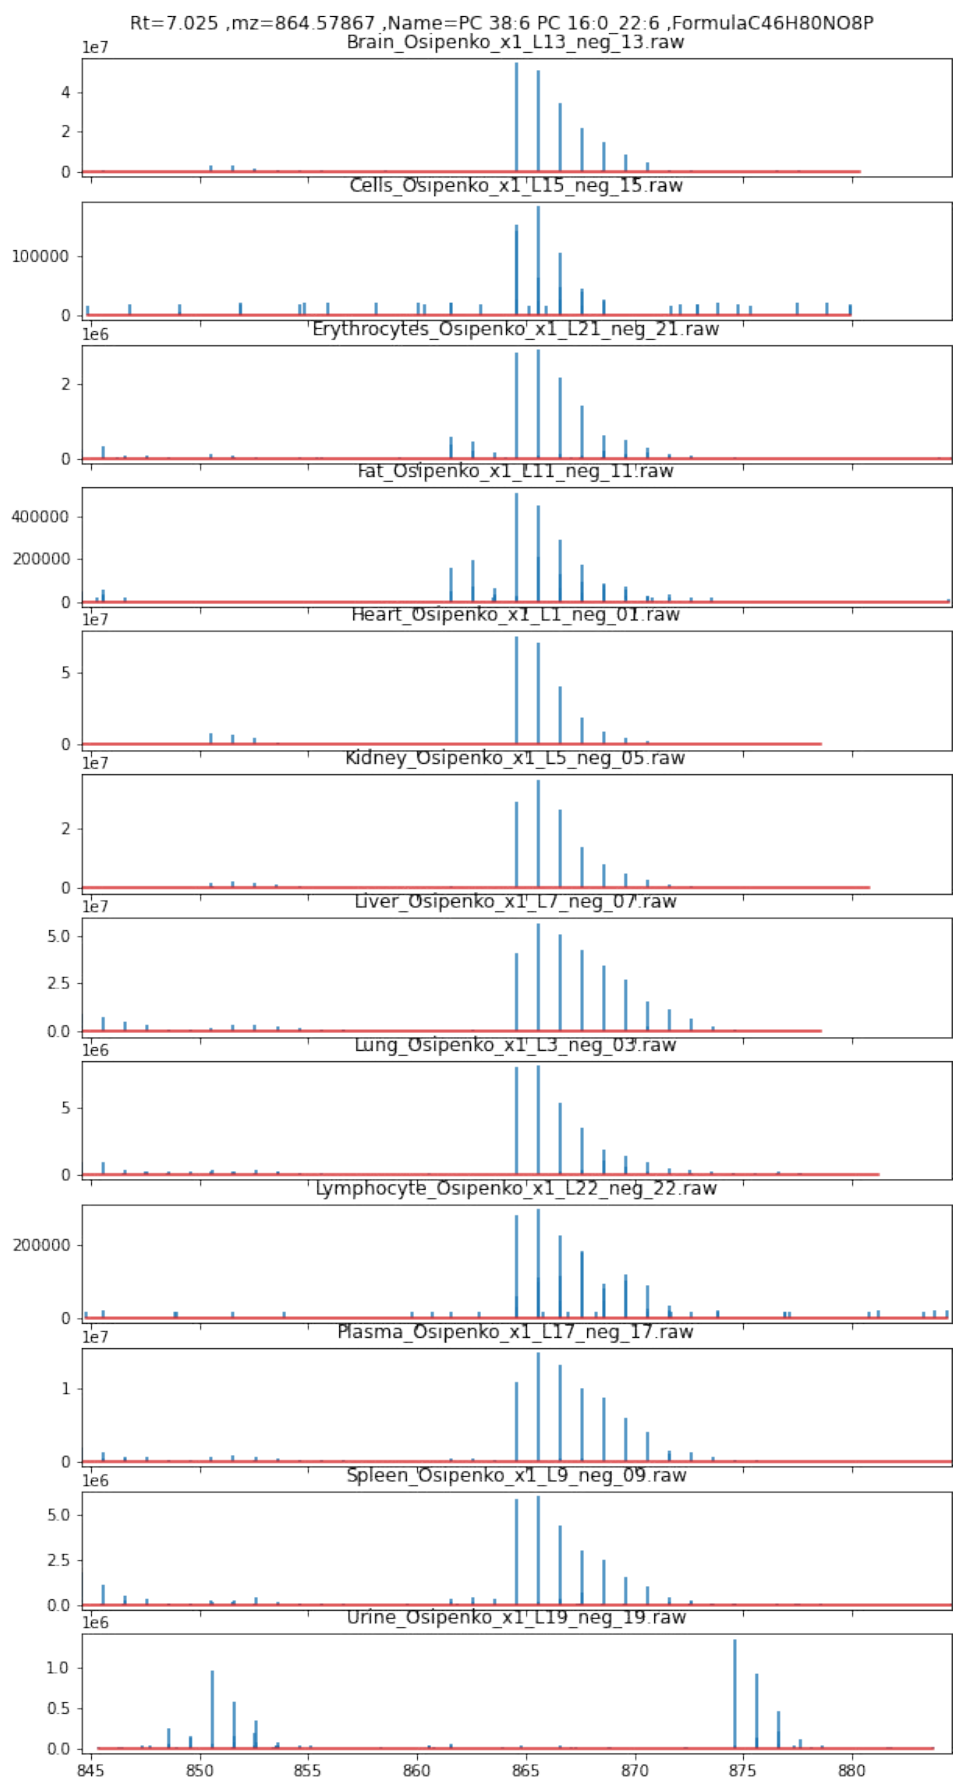

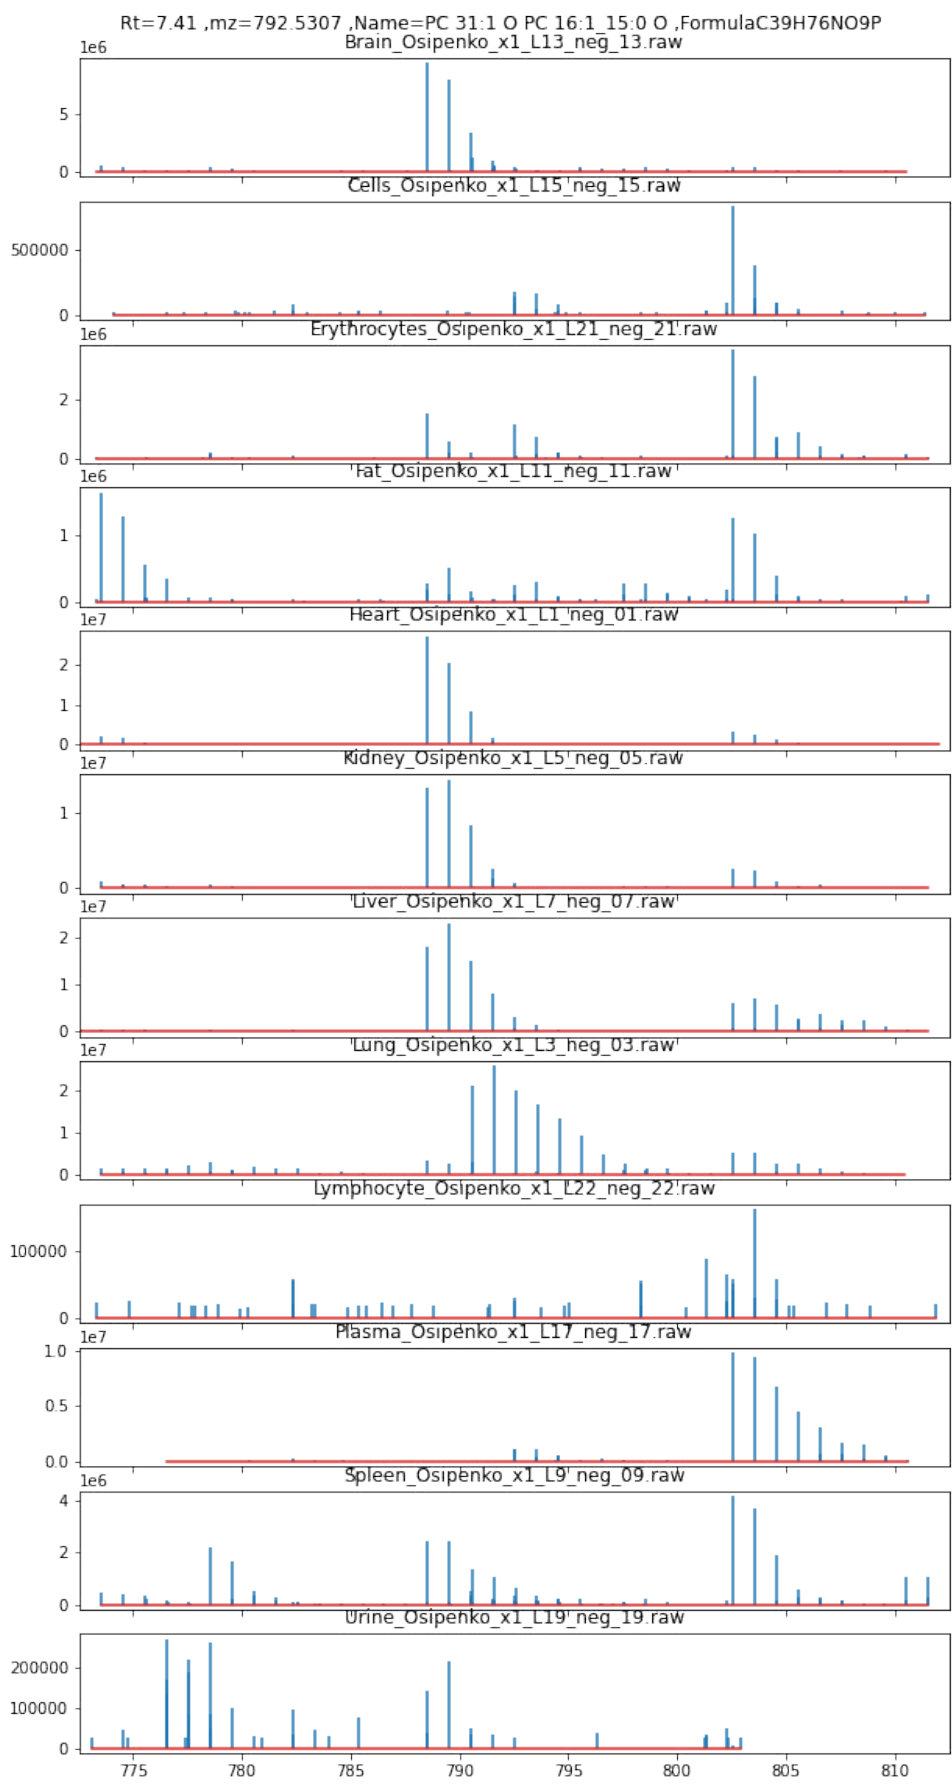

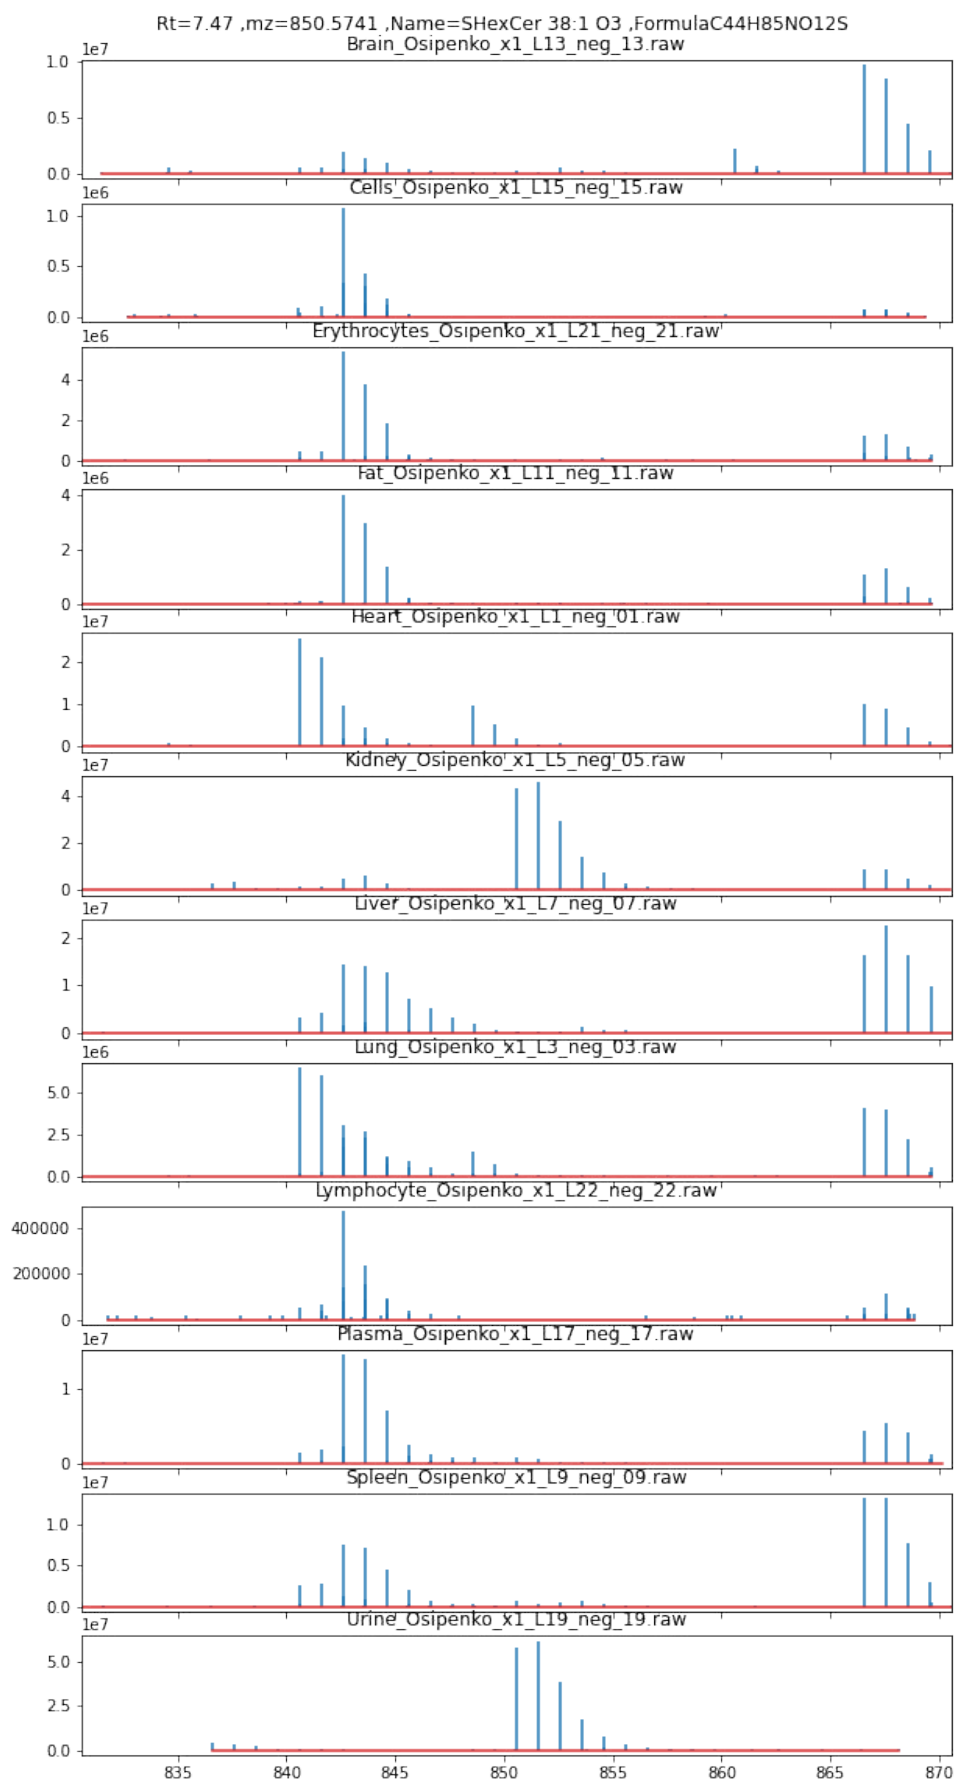

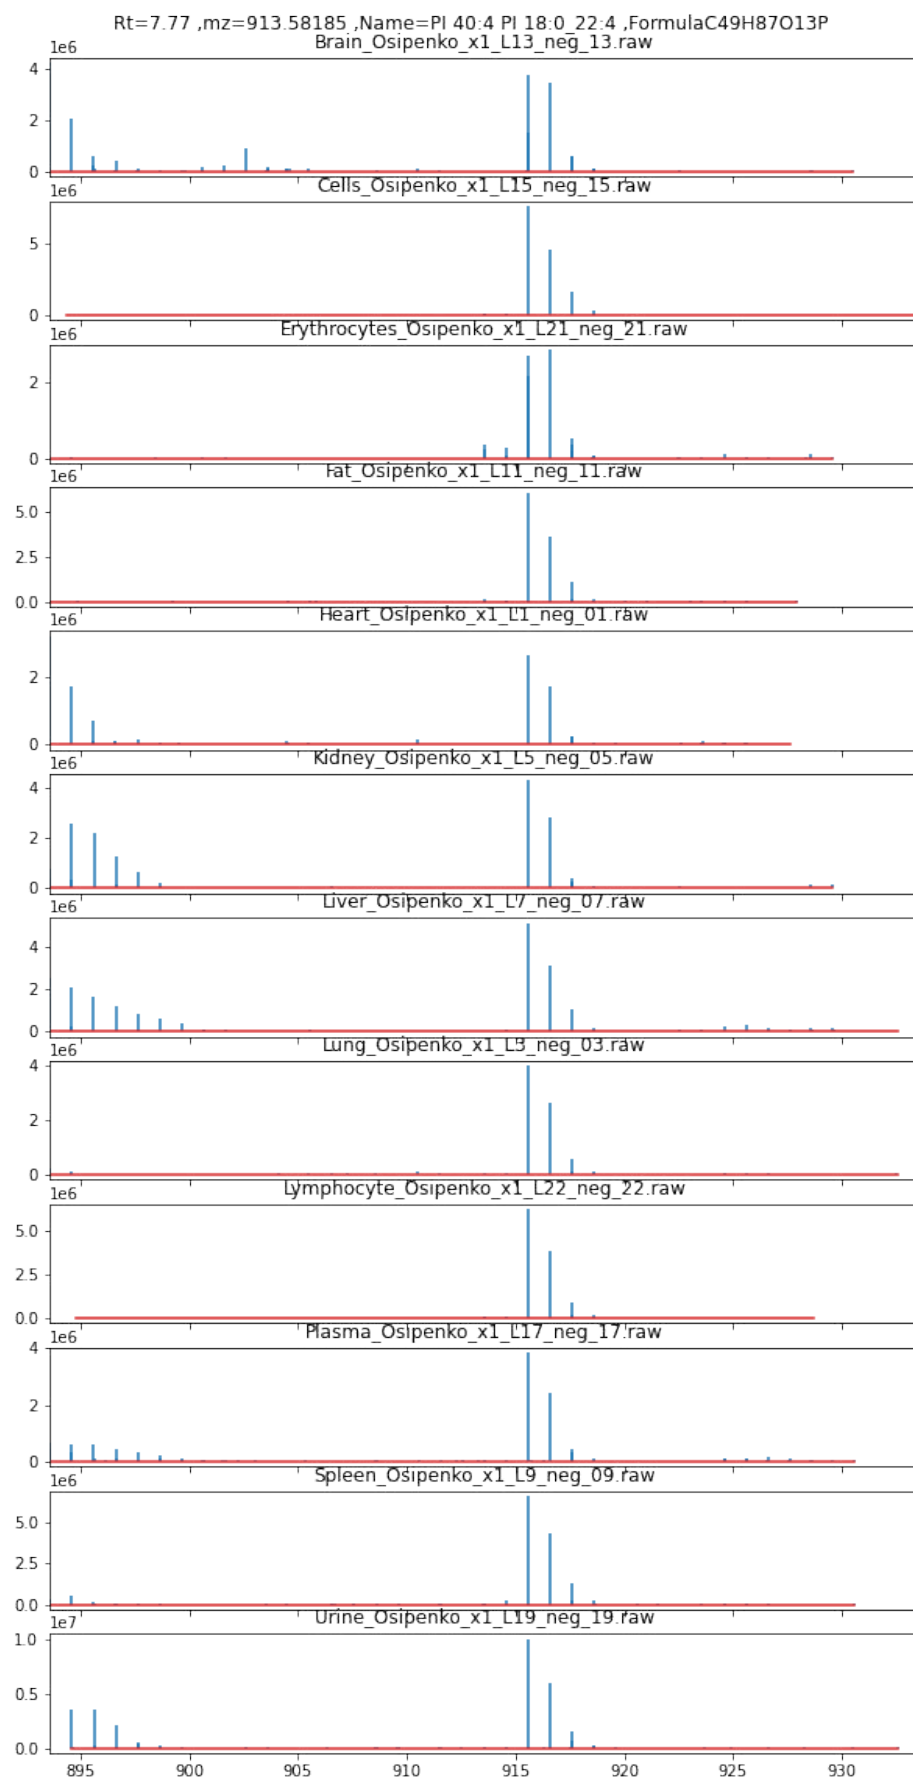

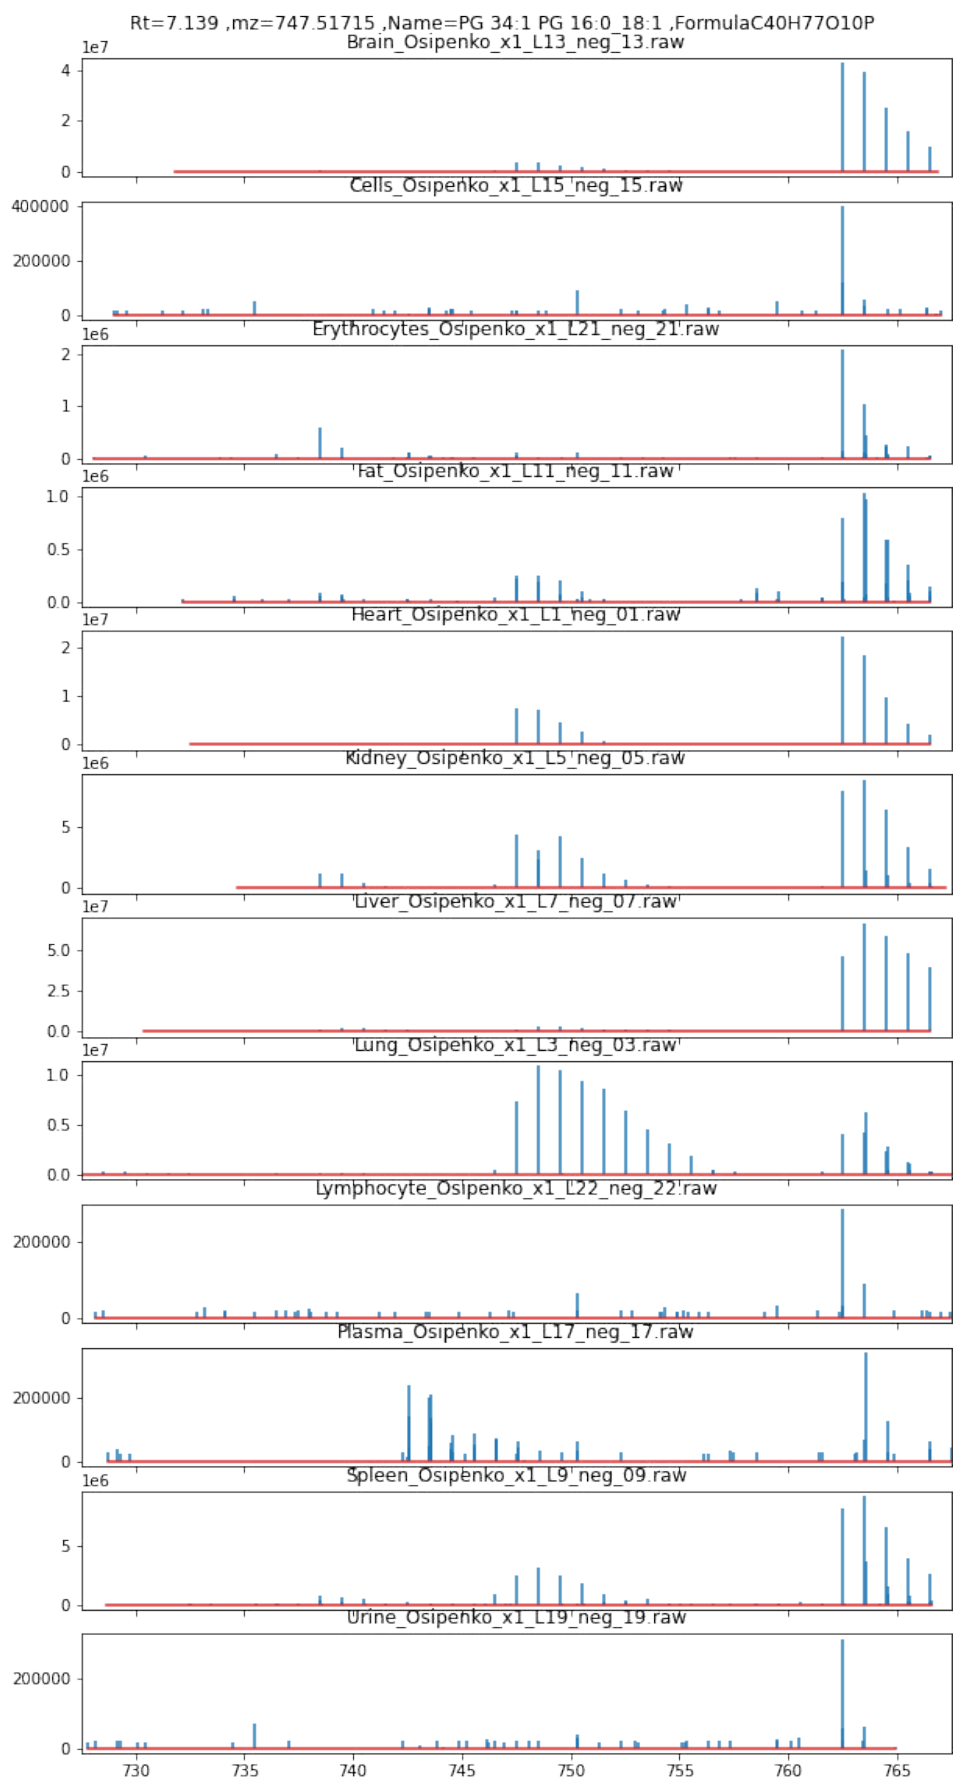

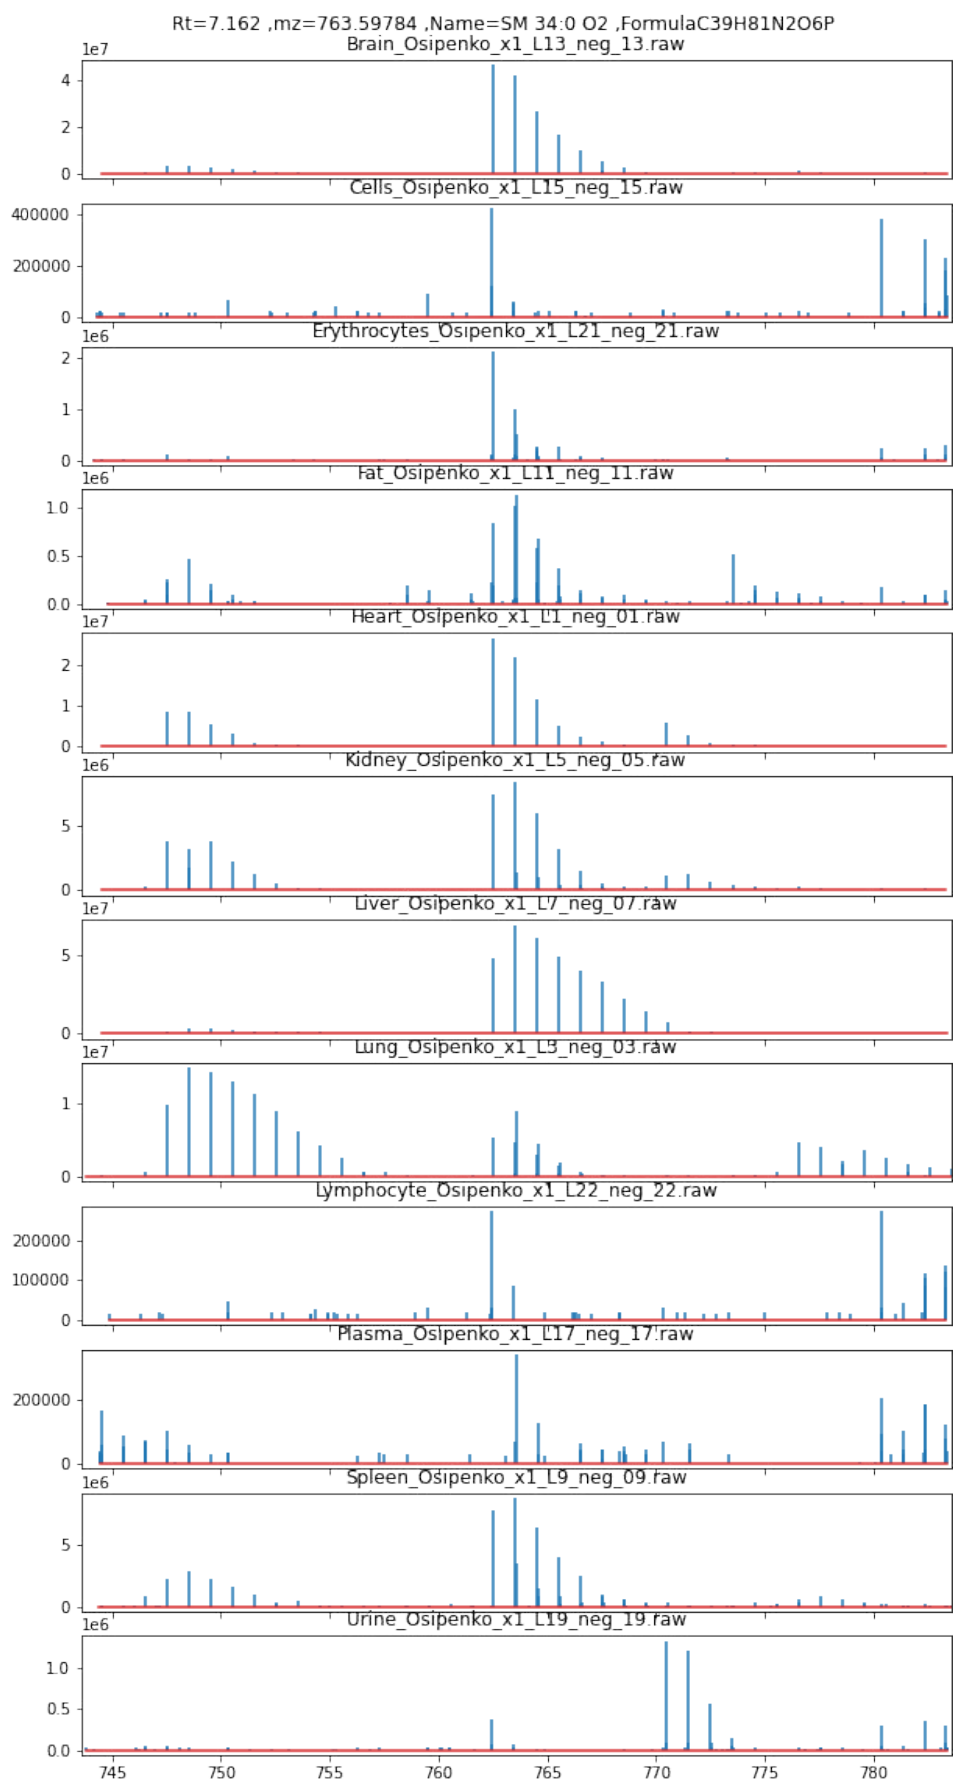

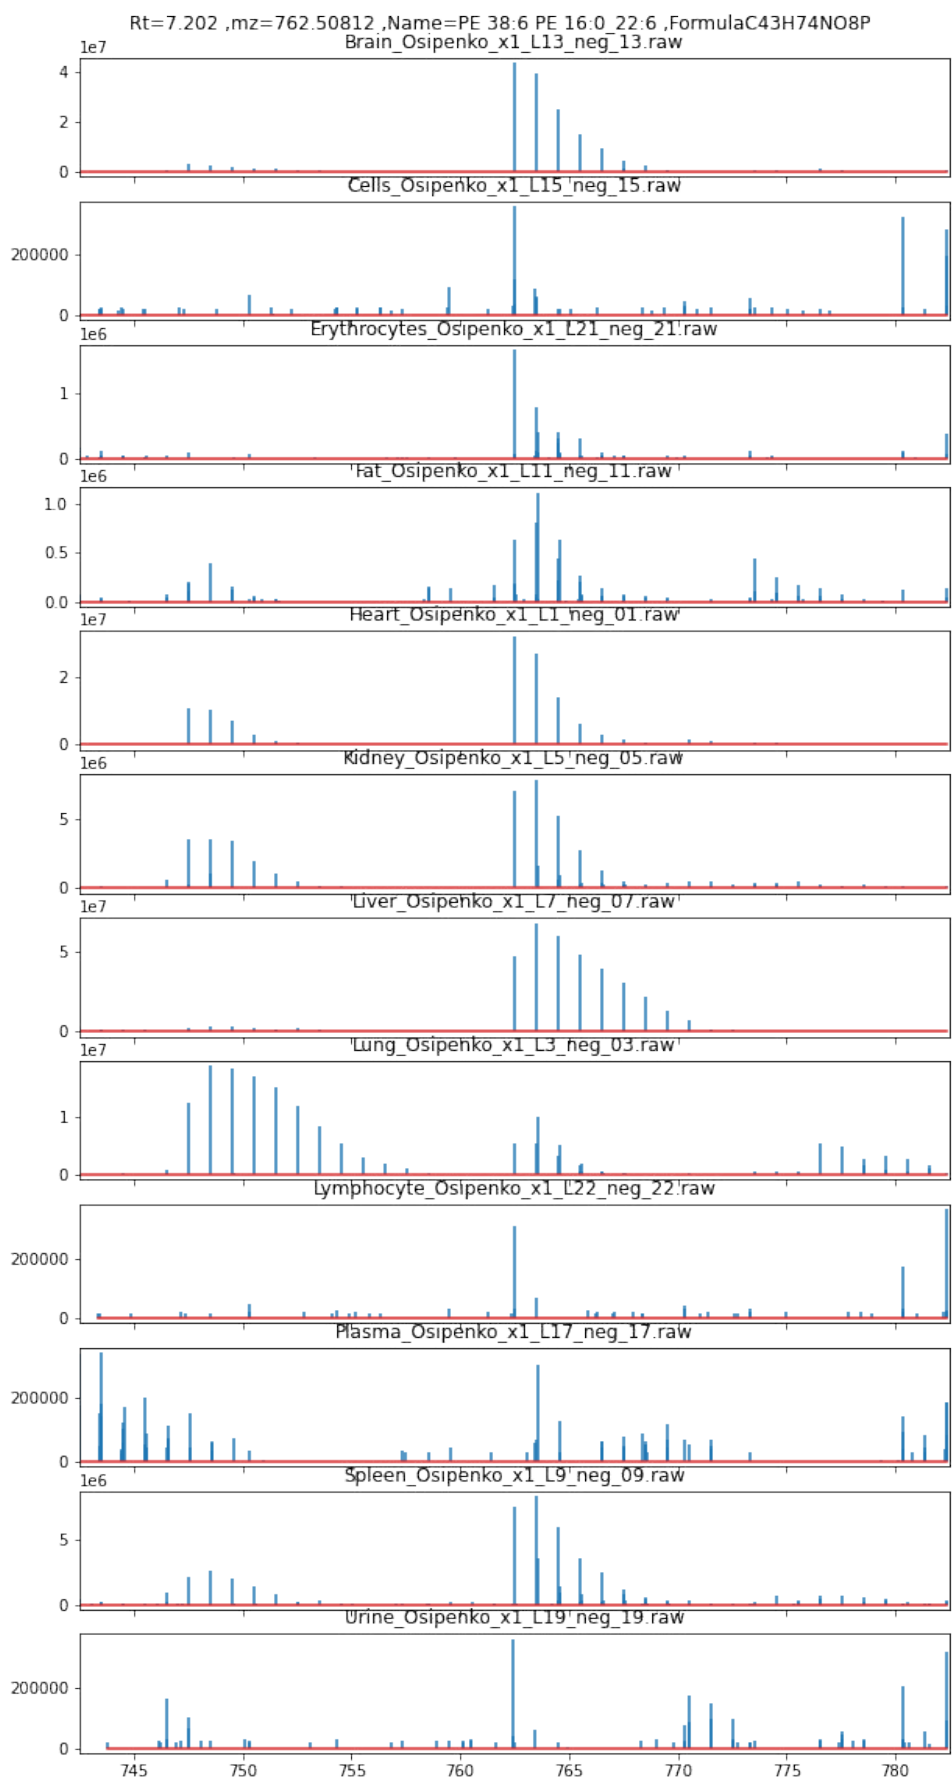

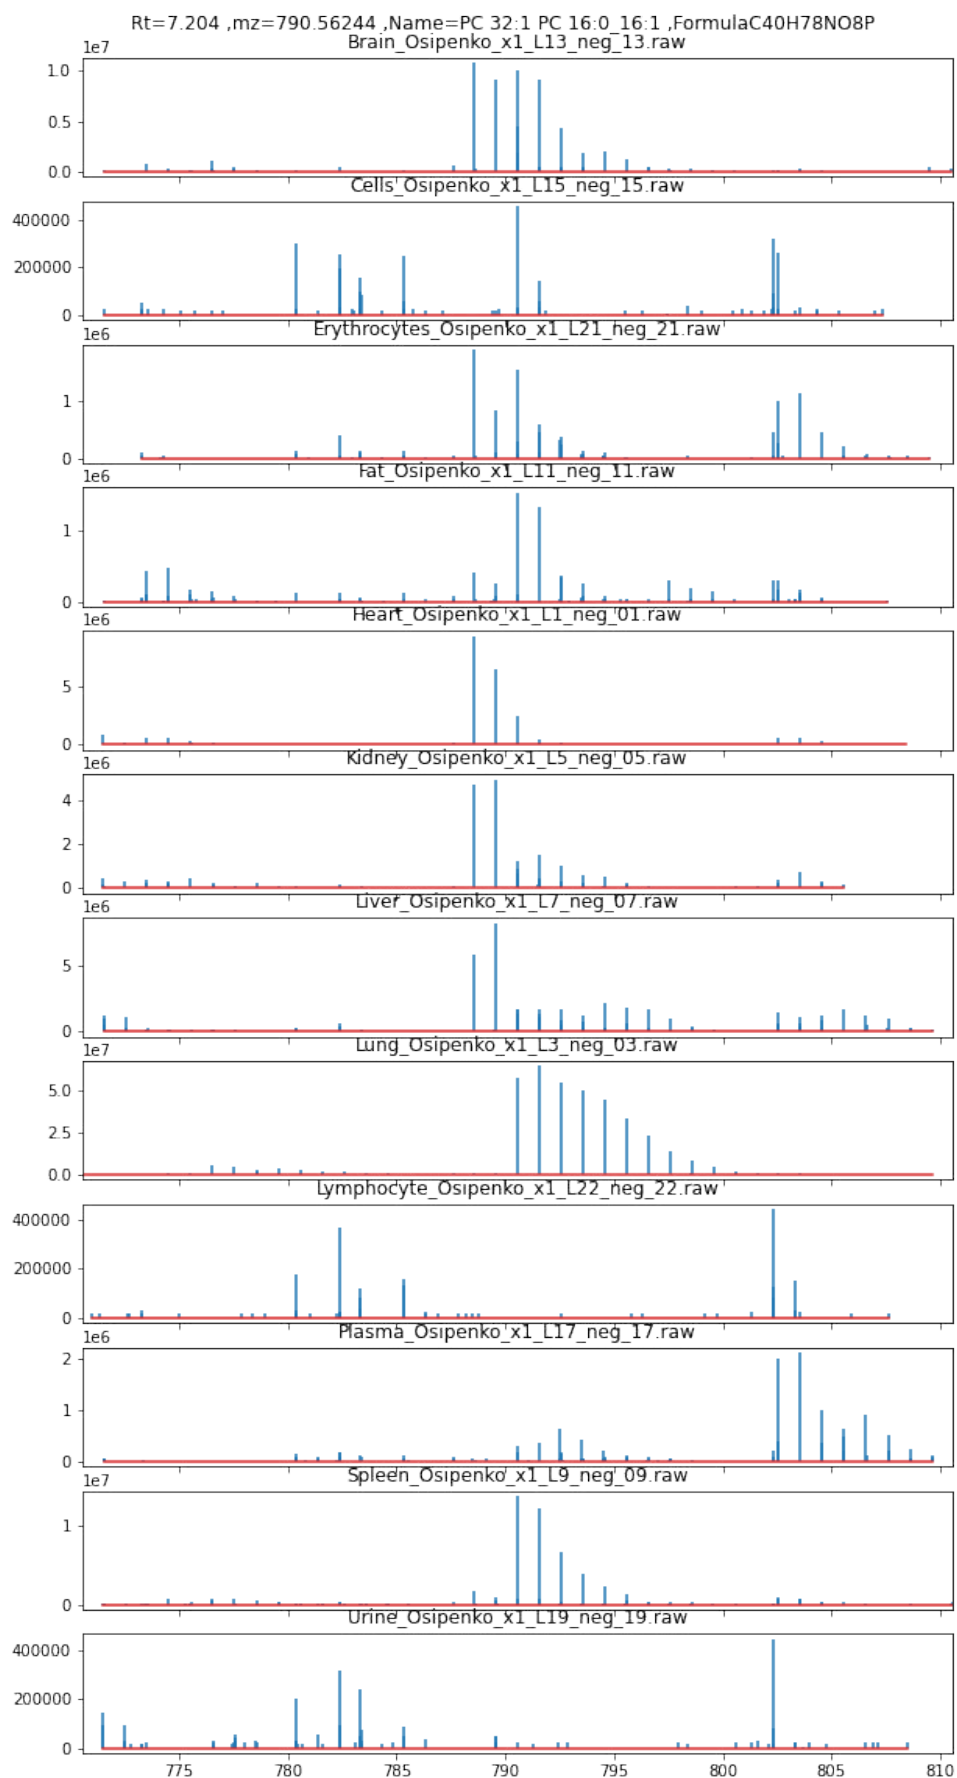



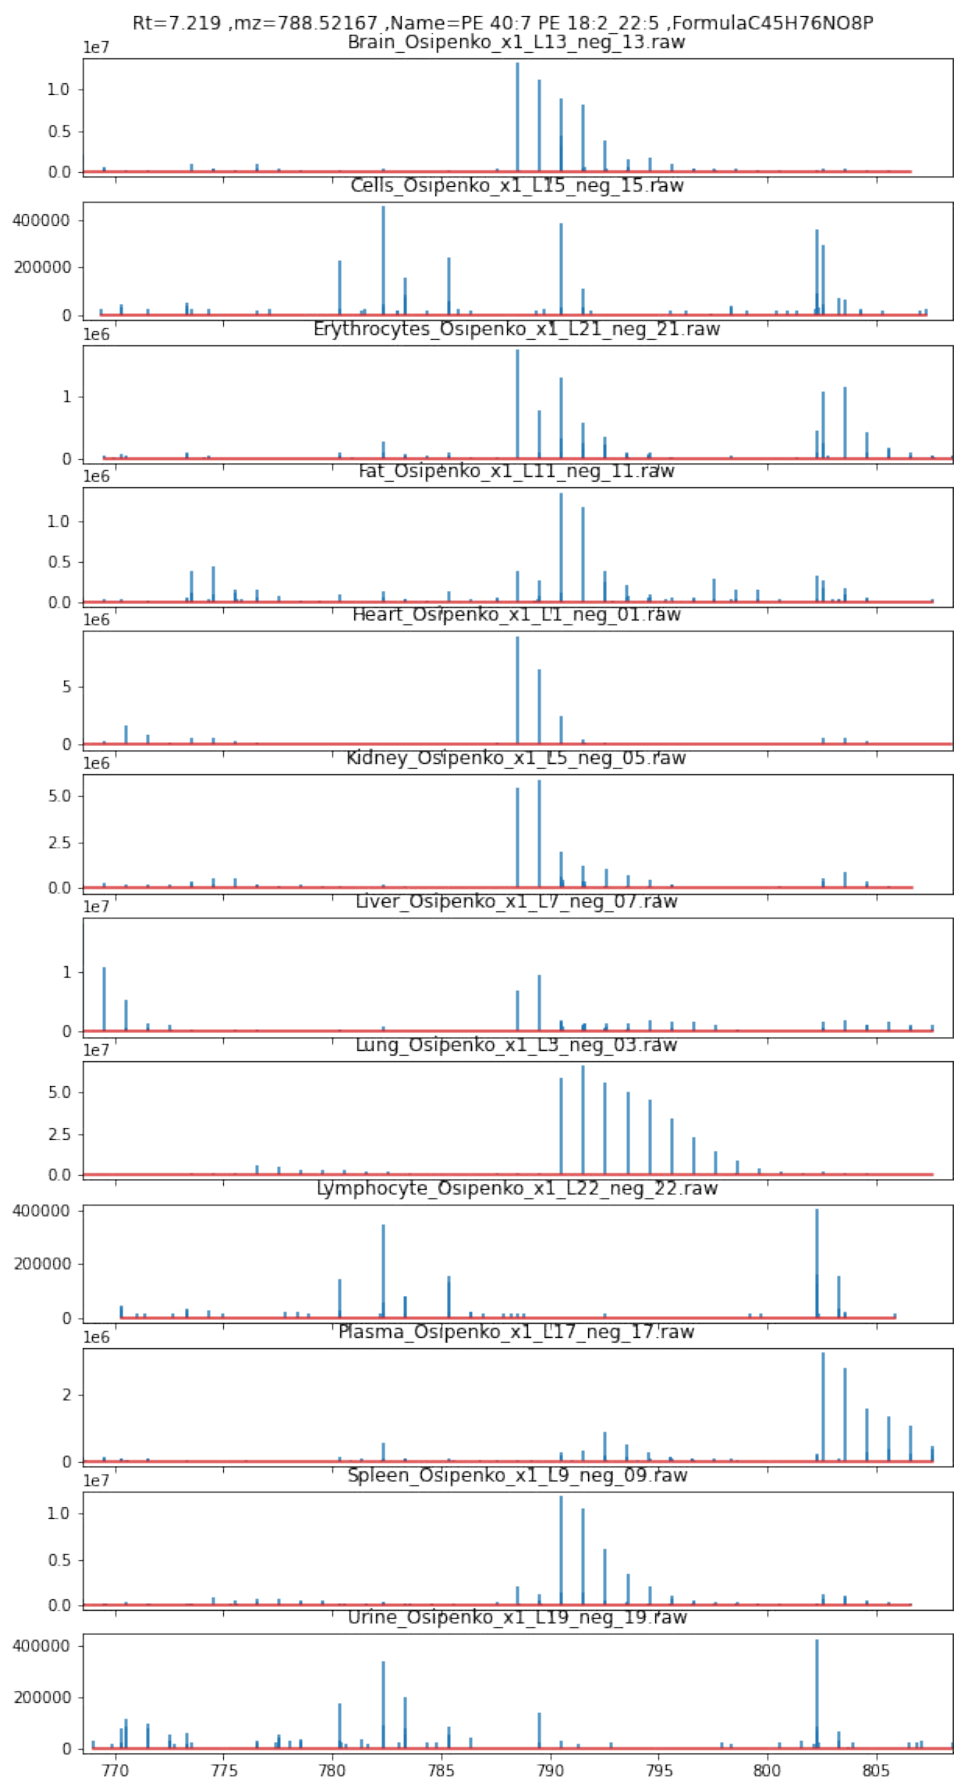

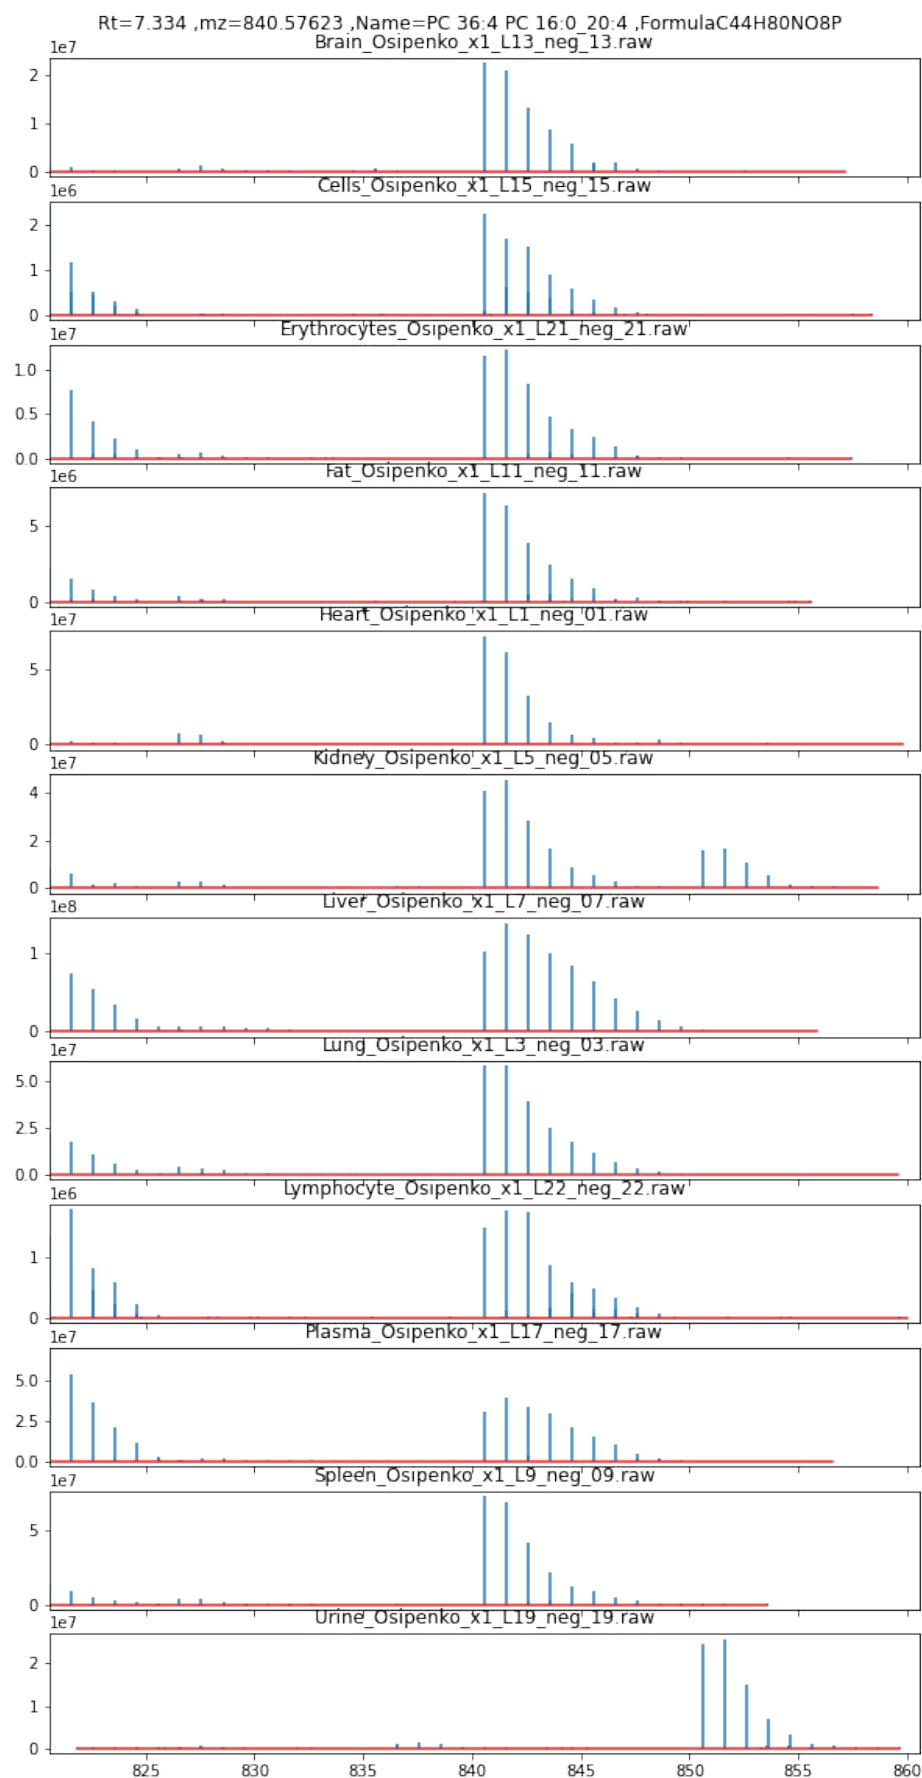

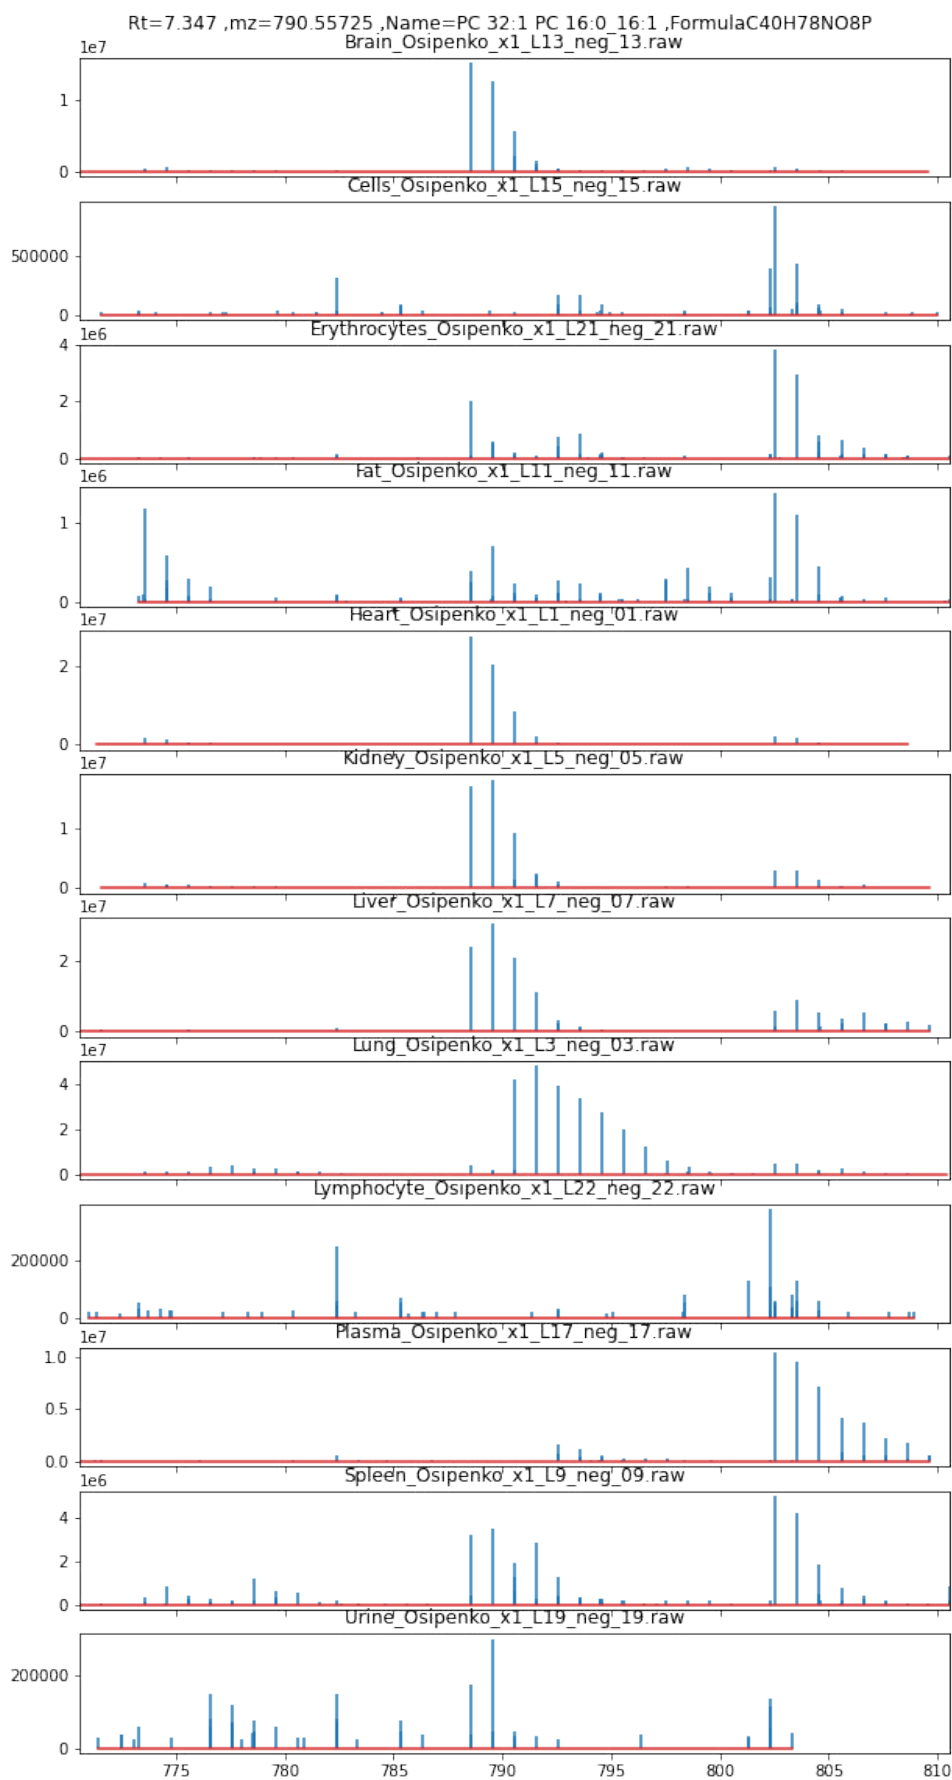

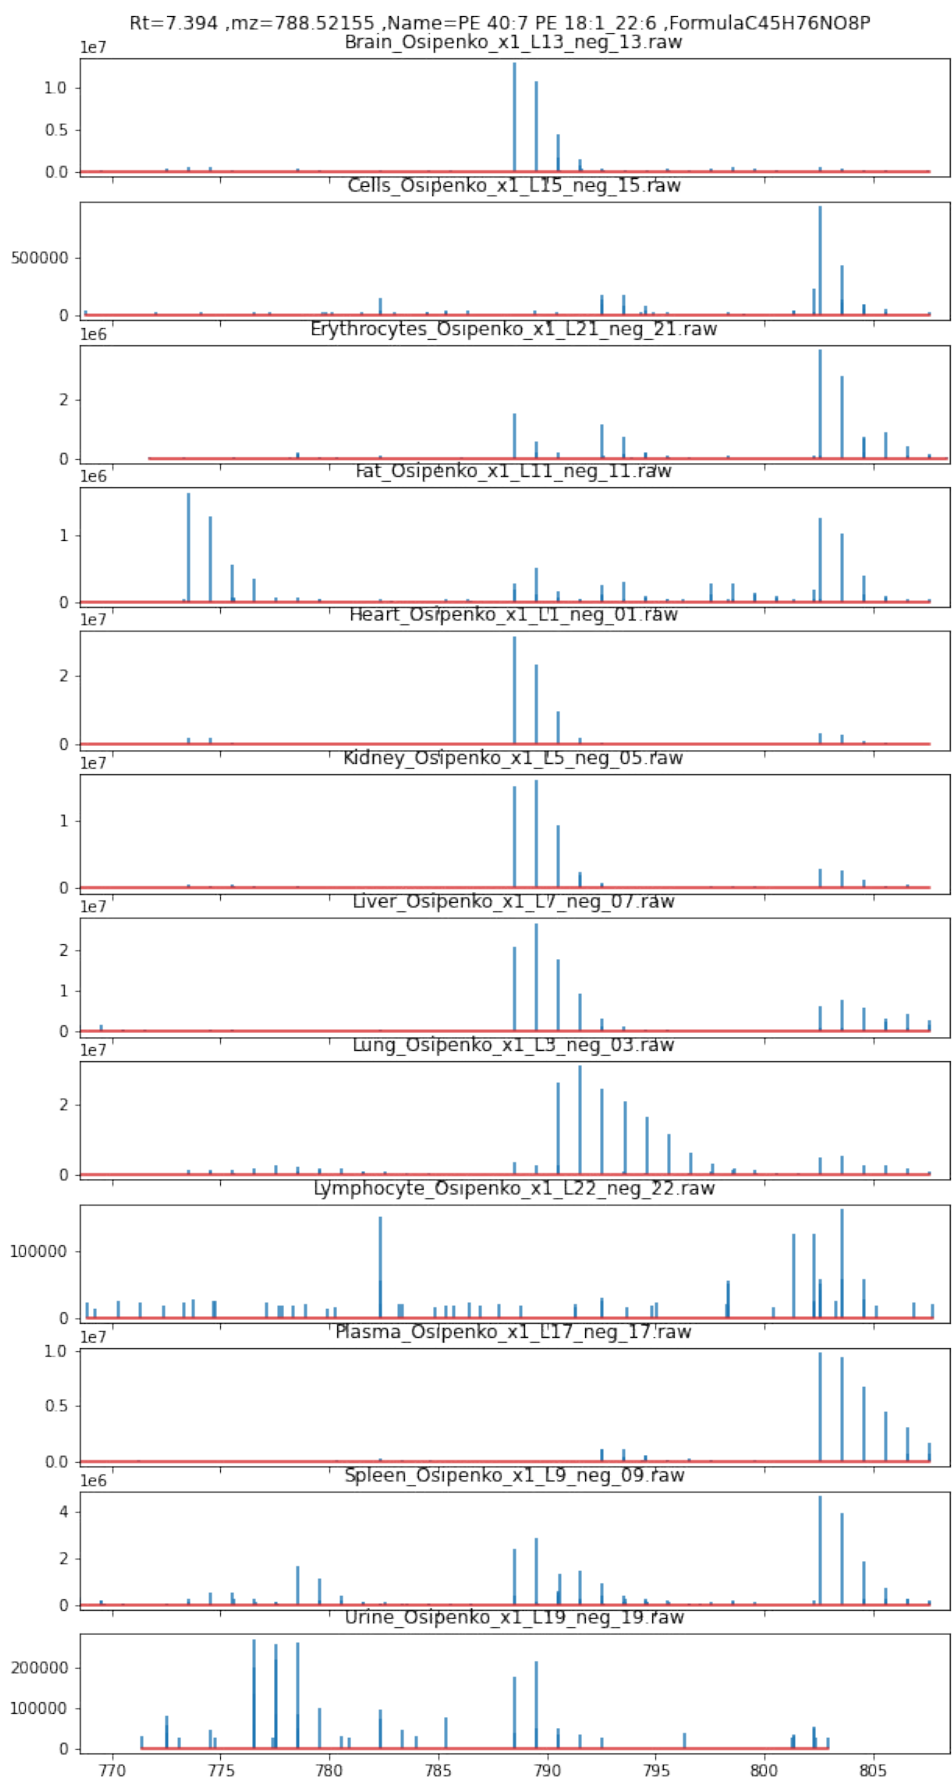

Rt=7.405 ,mz=816.57452 ,Name=PC 34:2 PC 16:0 18:2 ,FormulaC42H80NO8P  
Brain\_Osipenko\_x1\_L13\_neg\_13.raw

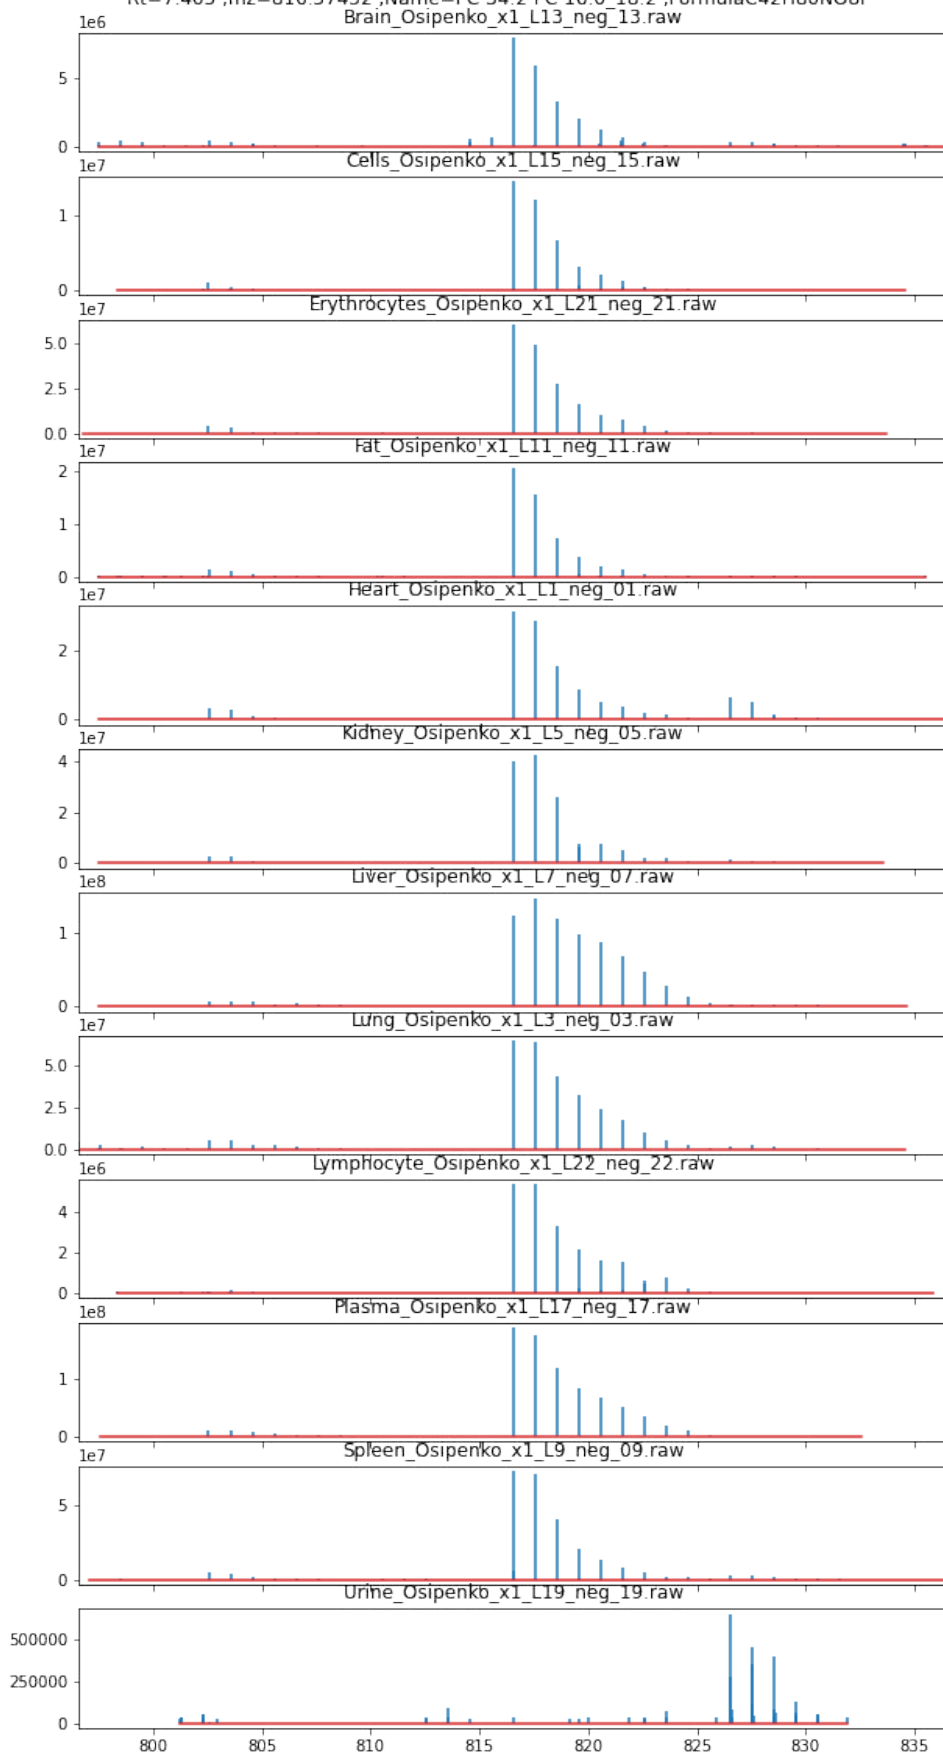

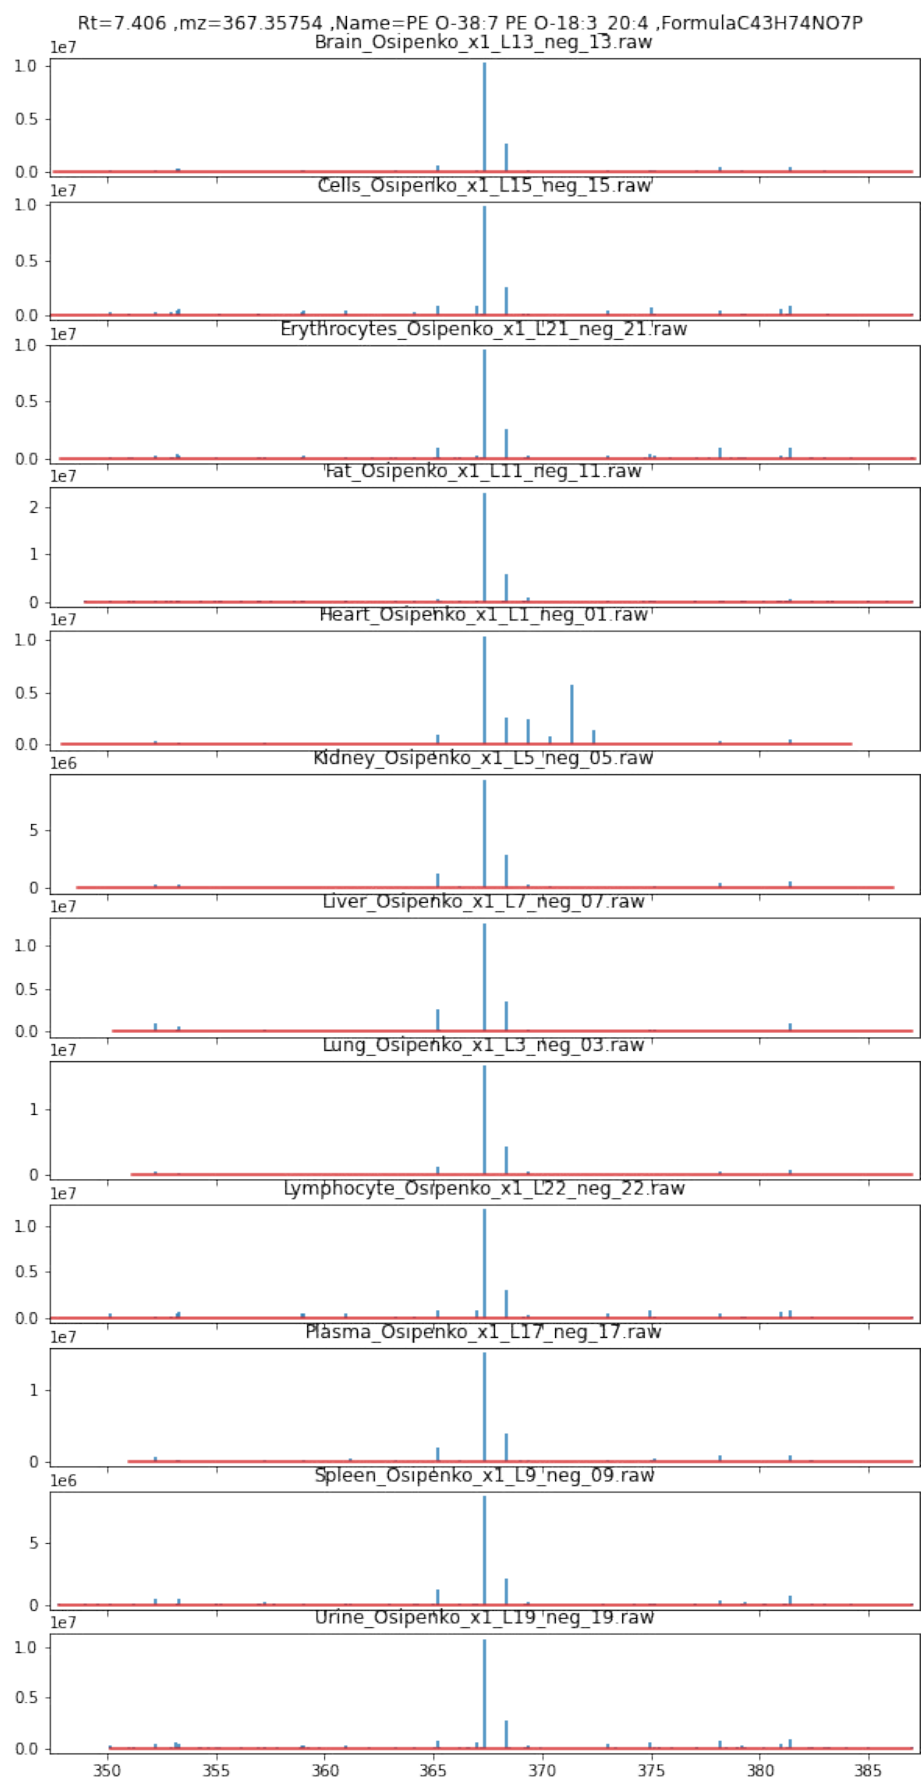

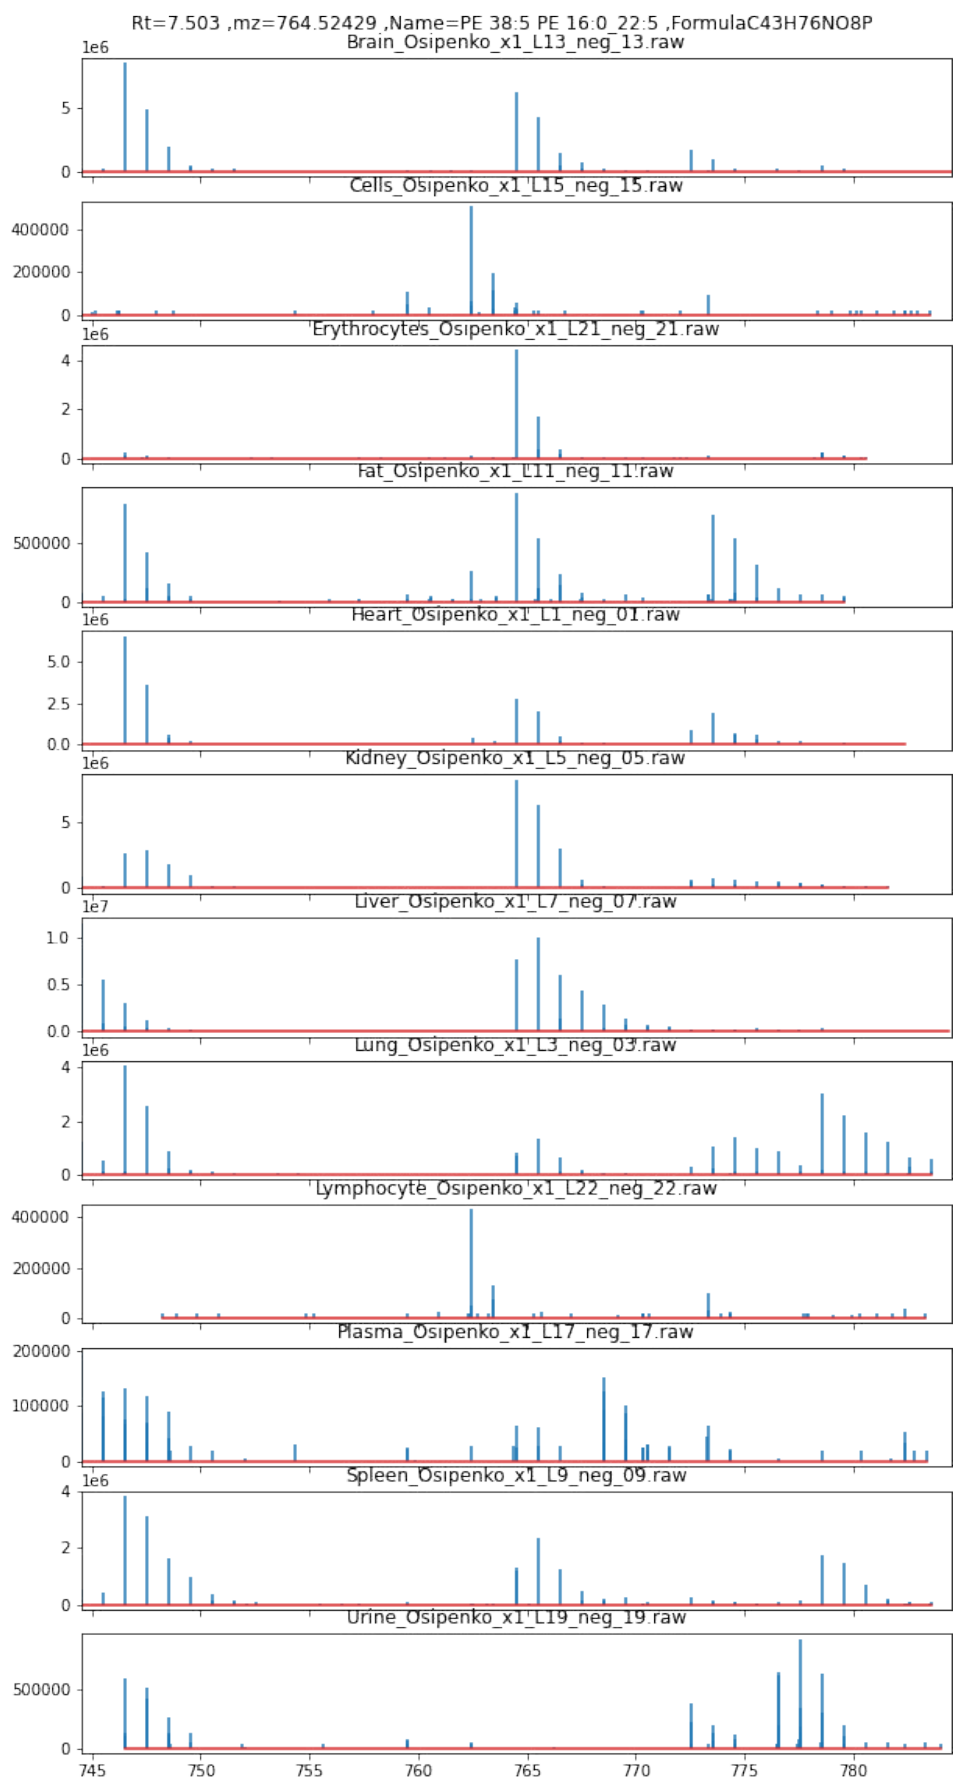

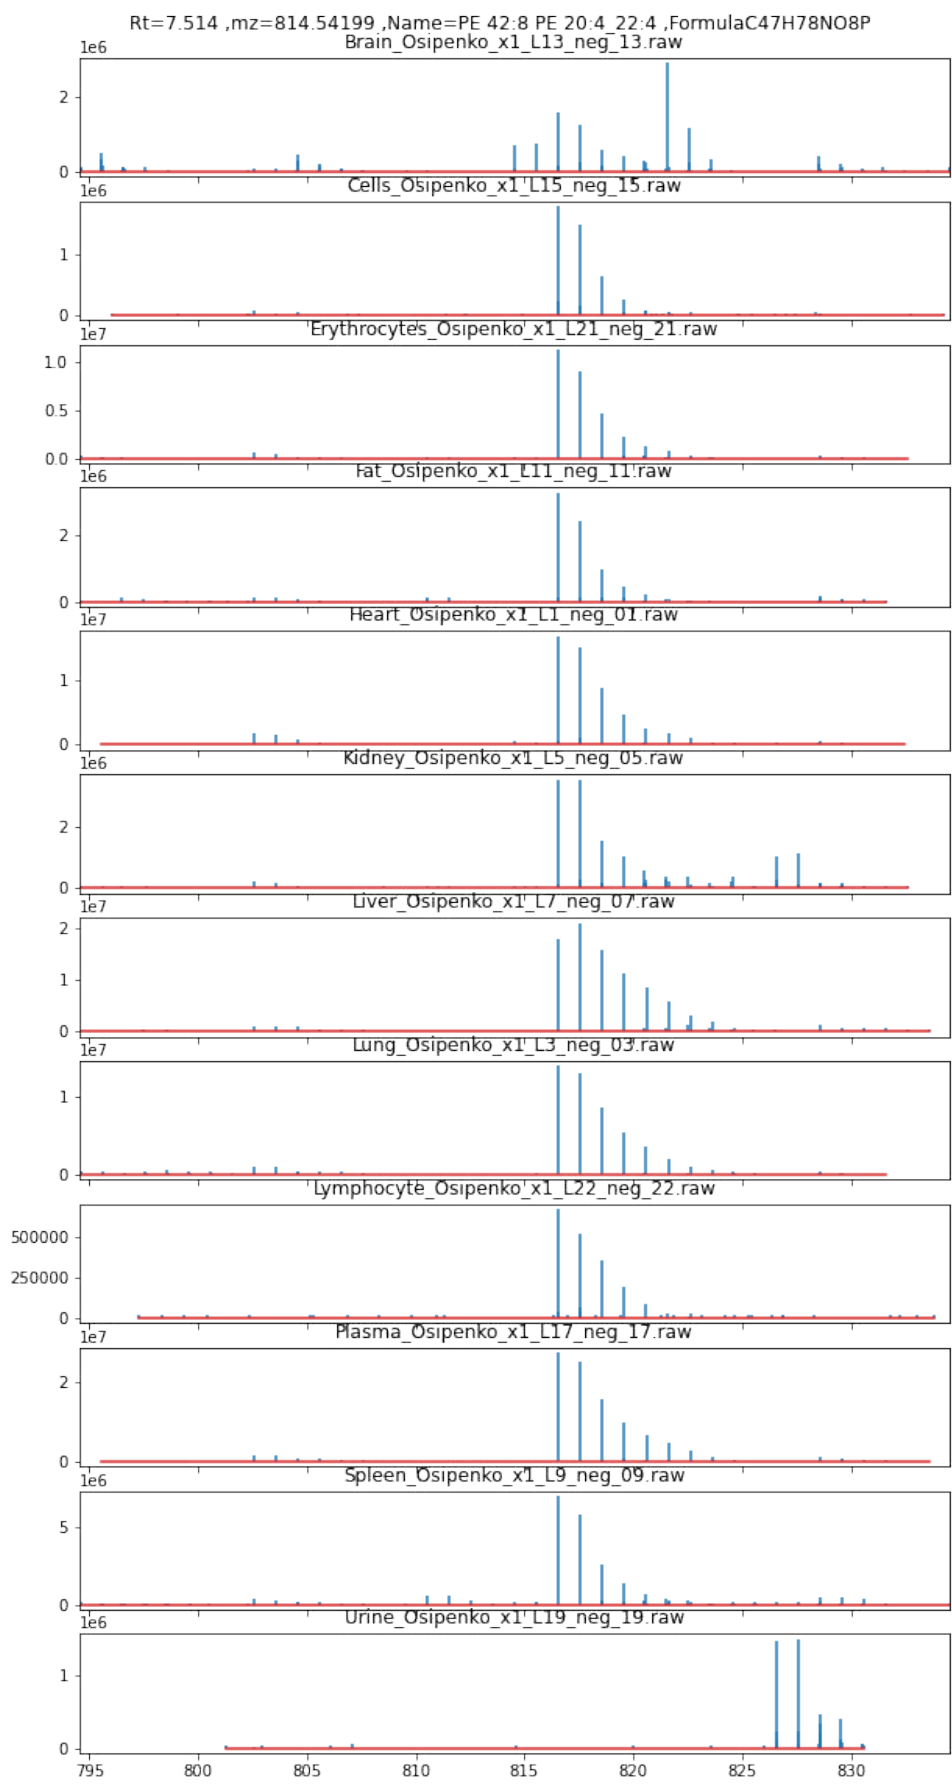



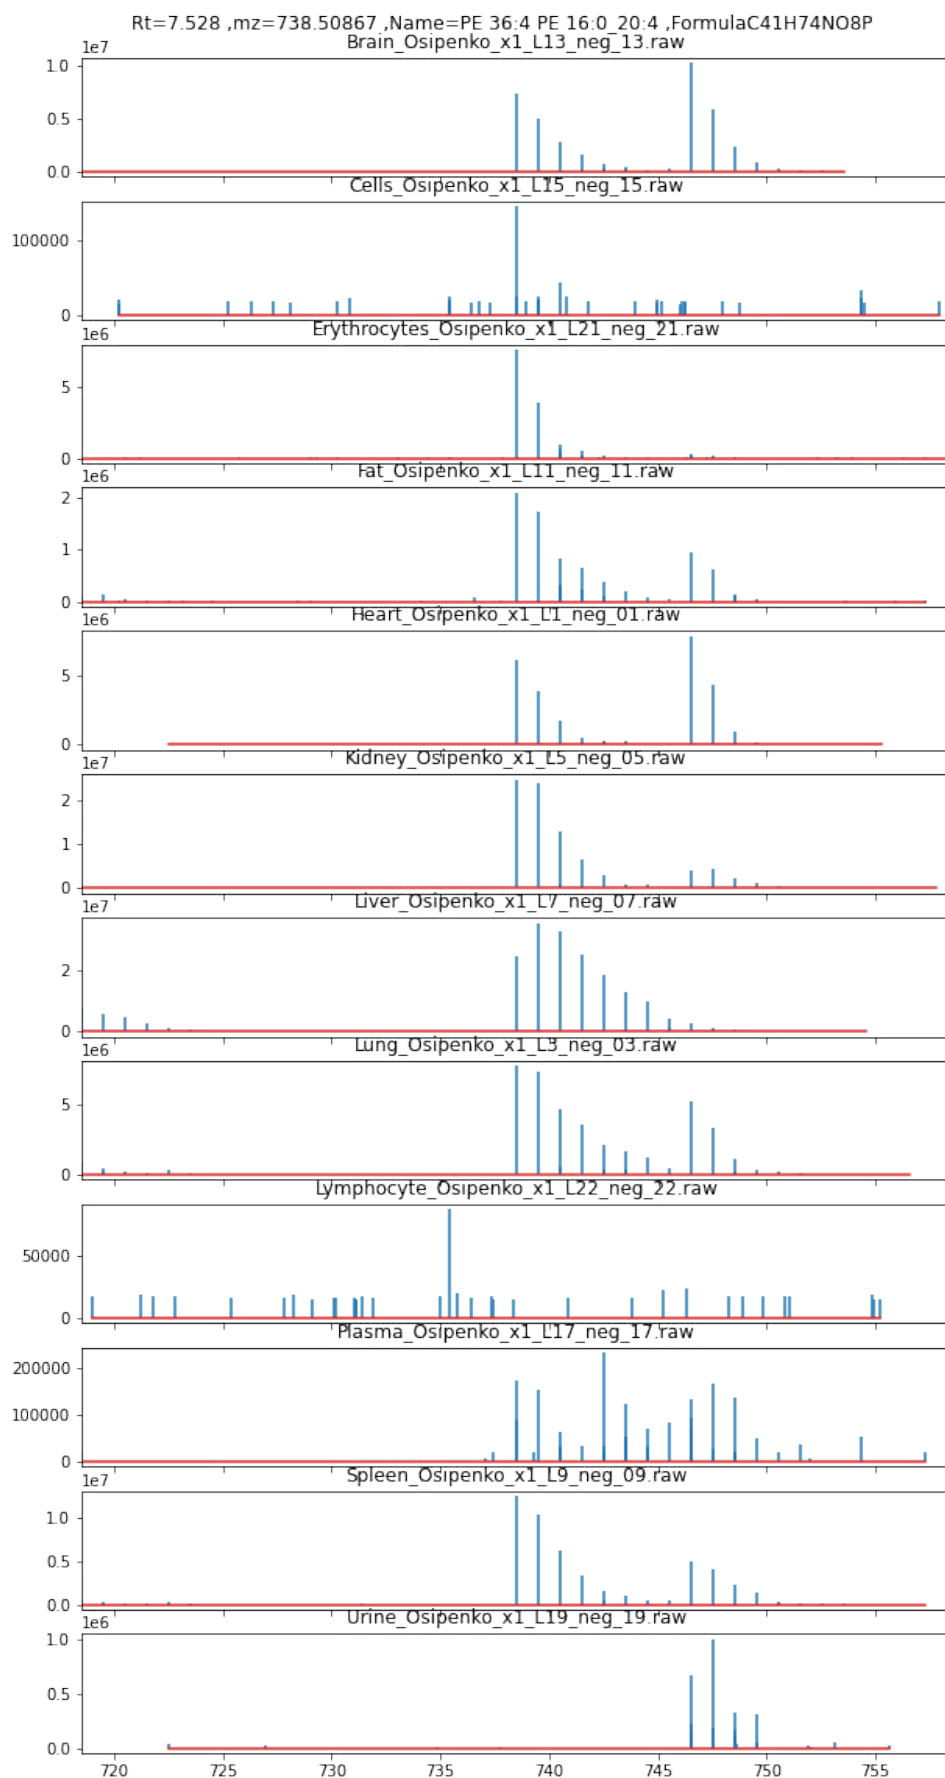

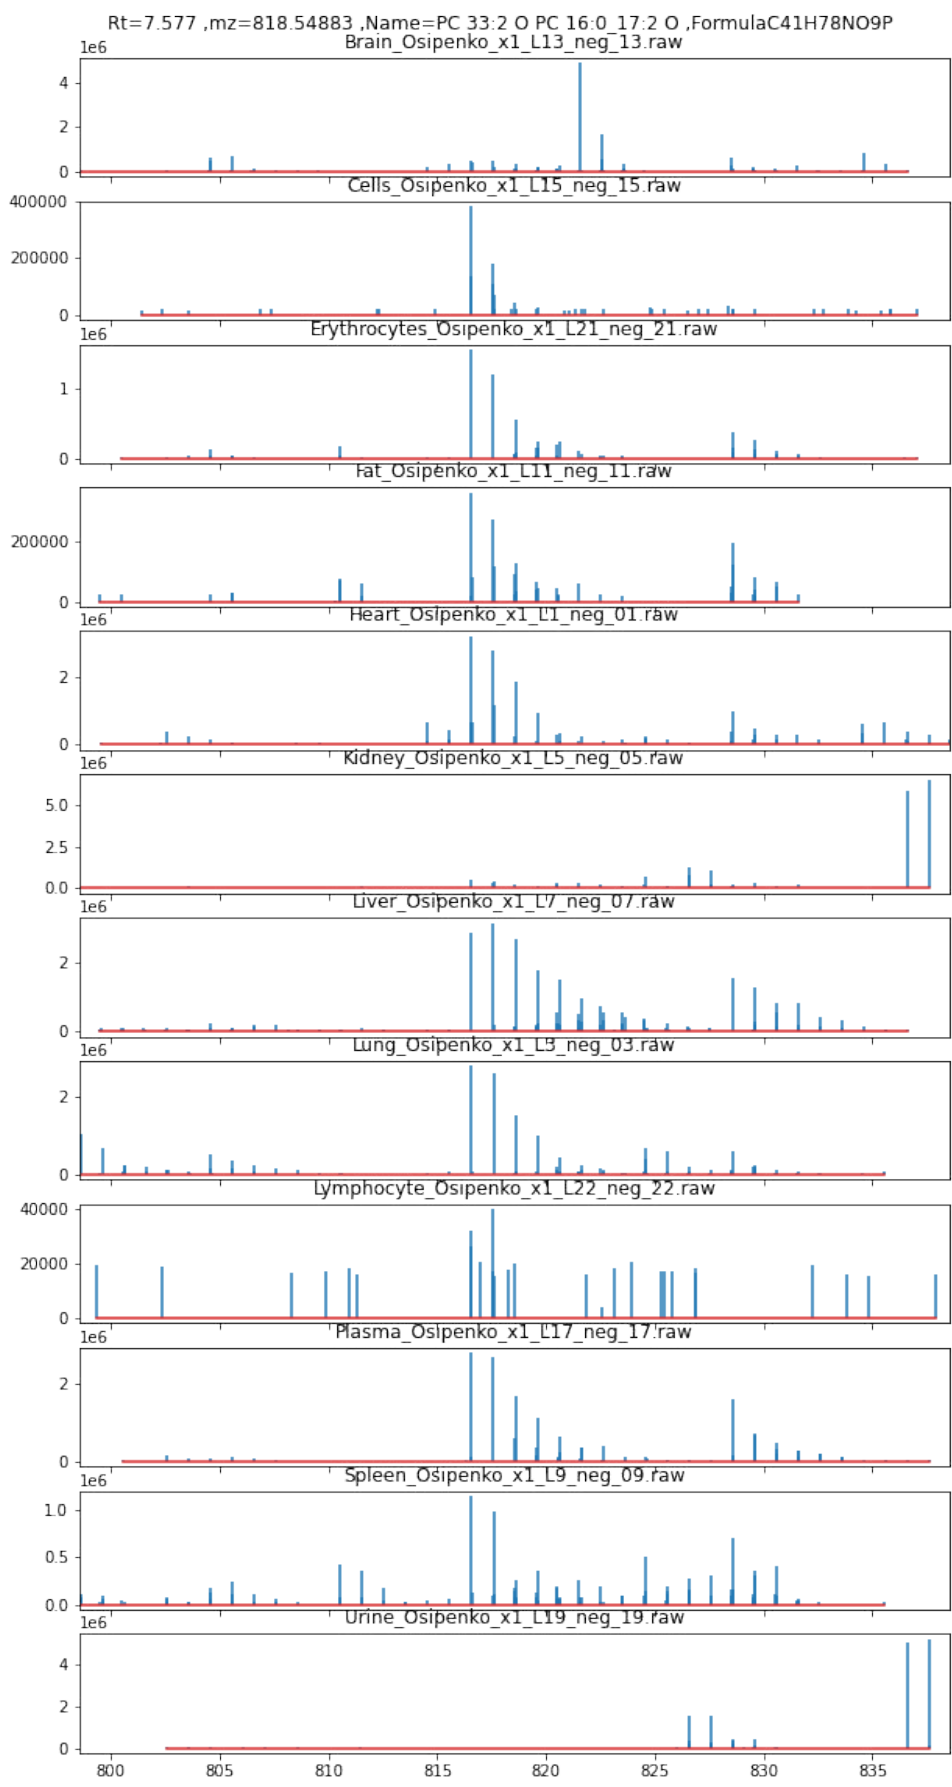

Rt=7.607 ,mz=714.50861 ,Name=PE 34:2 PE 16:0 18:2 ,FormulaC39H74NO8P  
Brain\_Osipenko\_x1\_L13\_neg\_13.raw

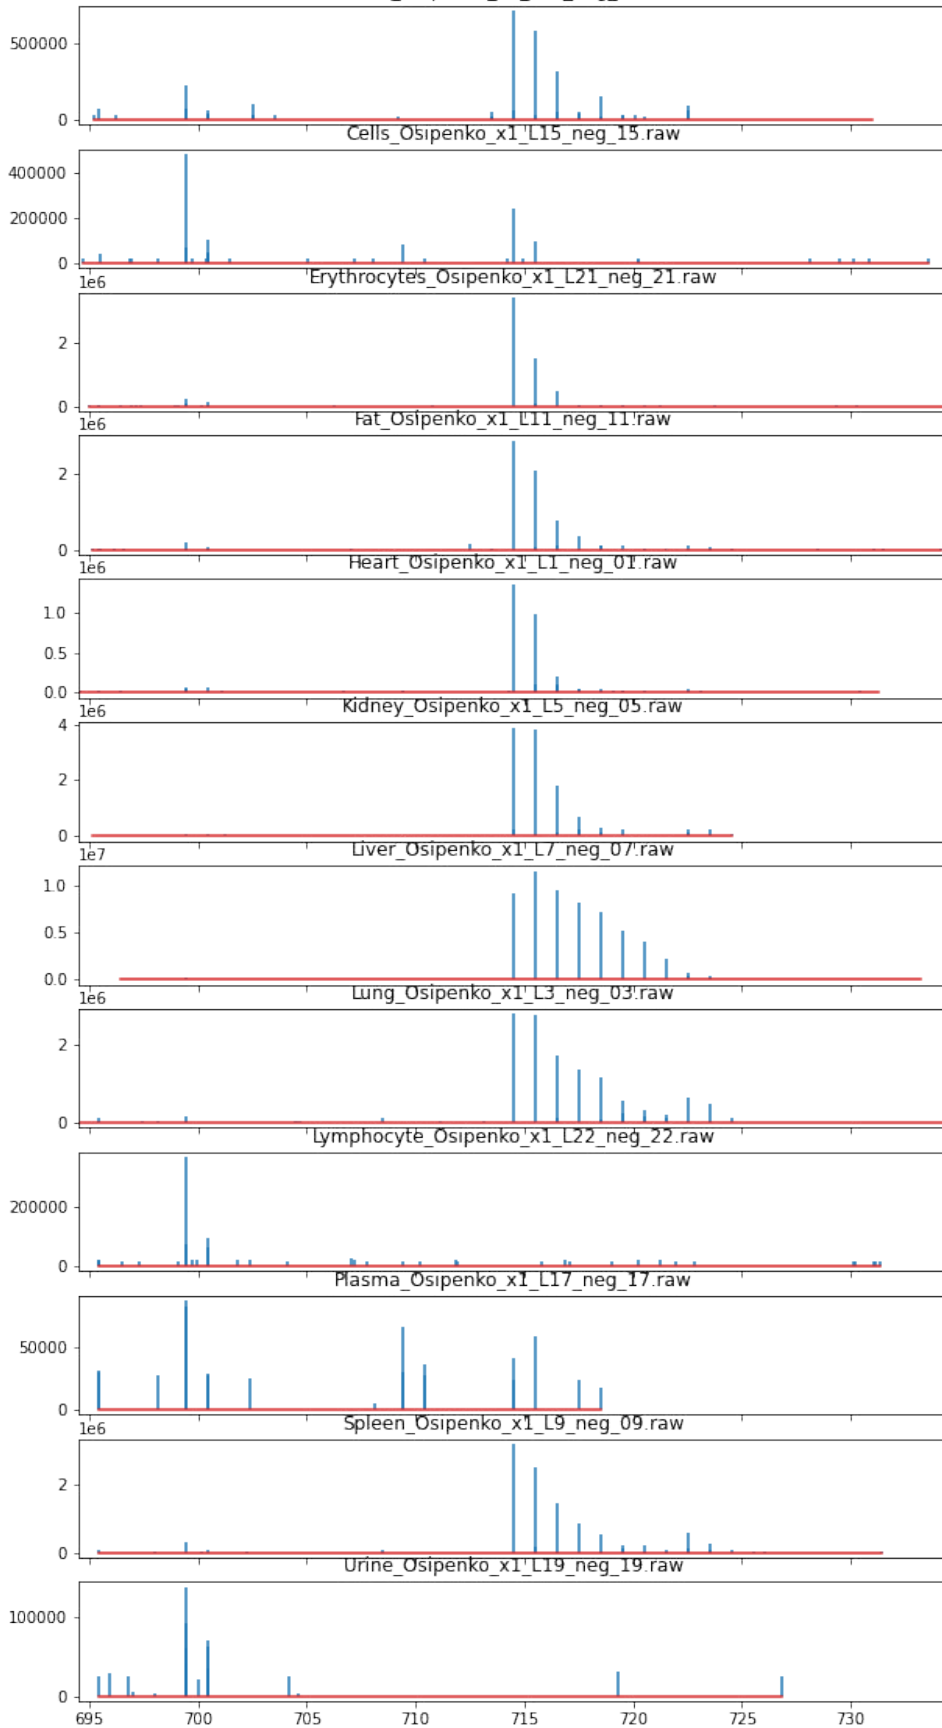

Rt=7.616 ,mz=842.62537 ,Name=PC O-37:3 PC O-19:2 18:1 ,FormulaC45H86NO7P  
Brain\_Osipenko\_x1\_L13\_neg\_13.raw

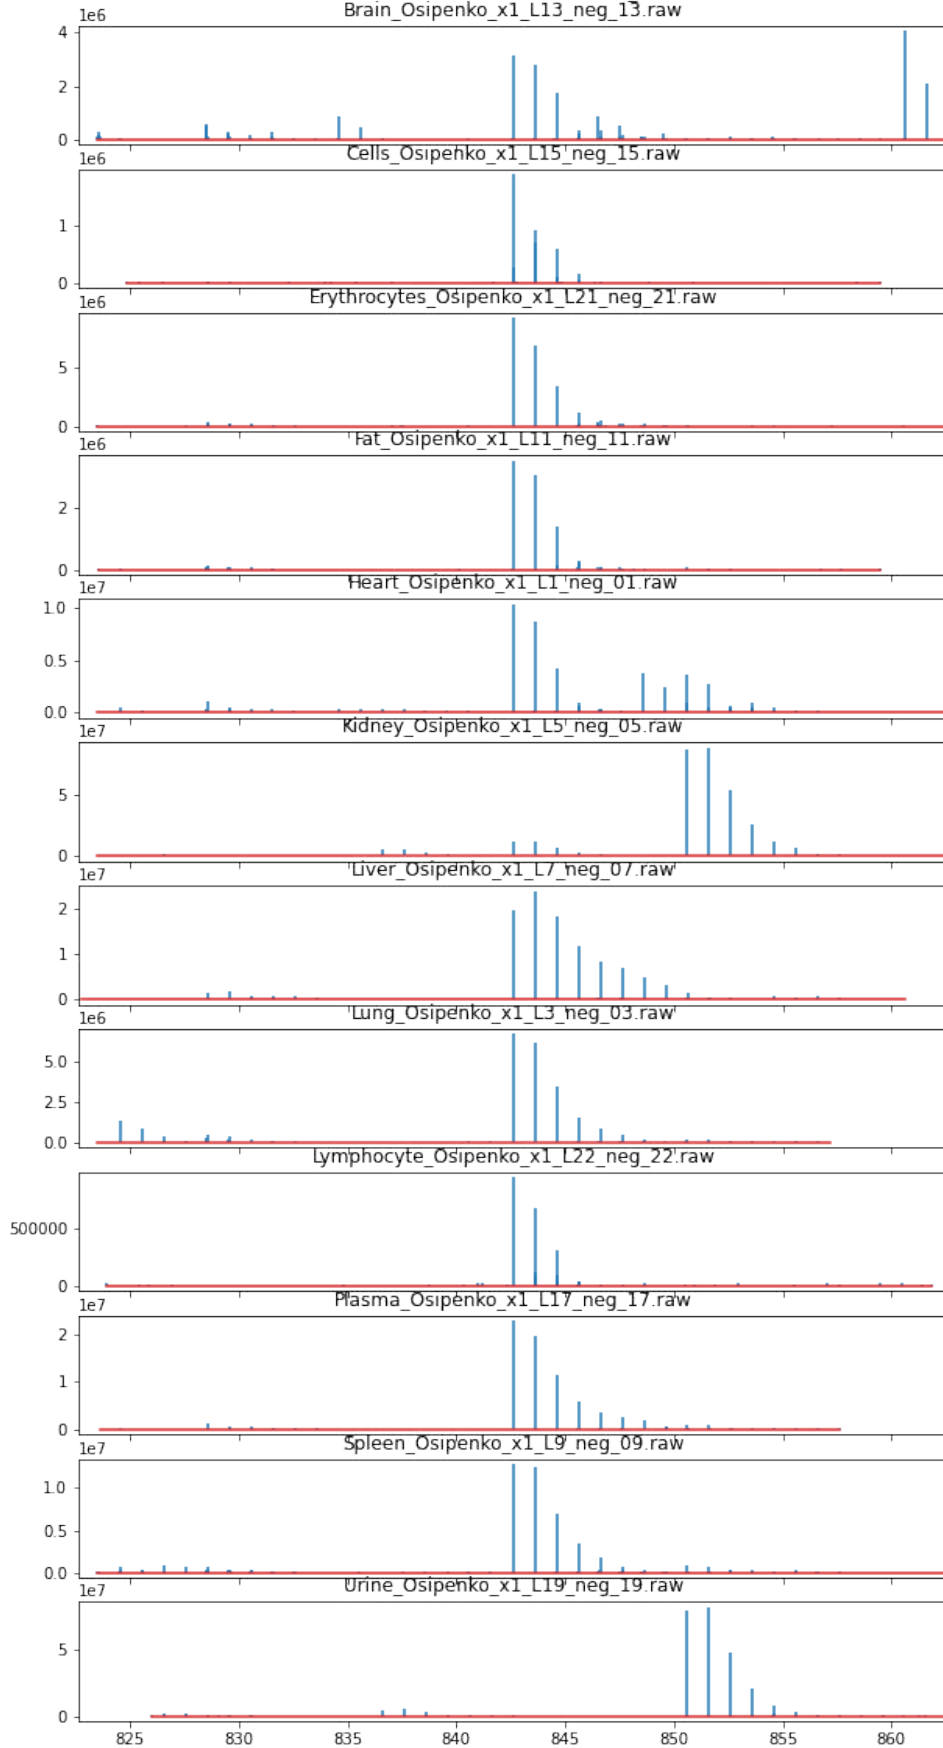

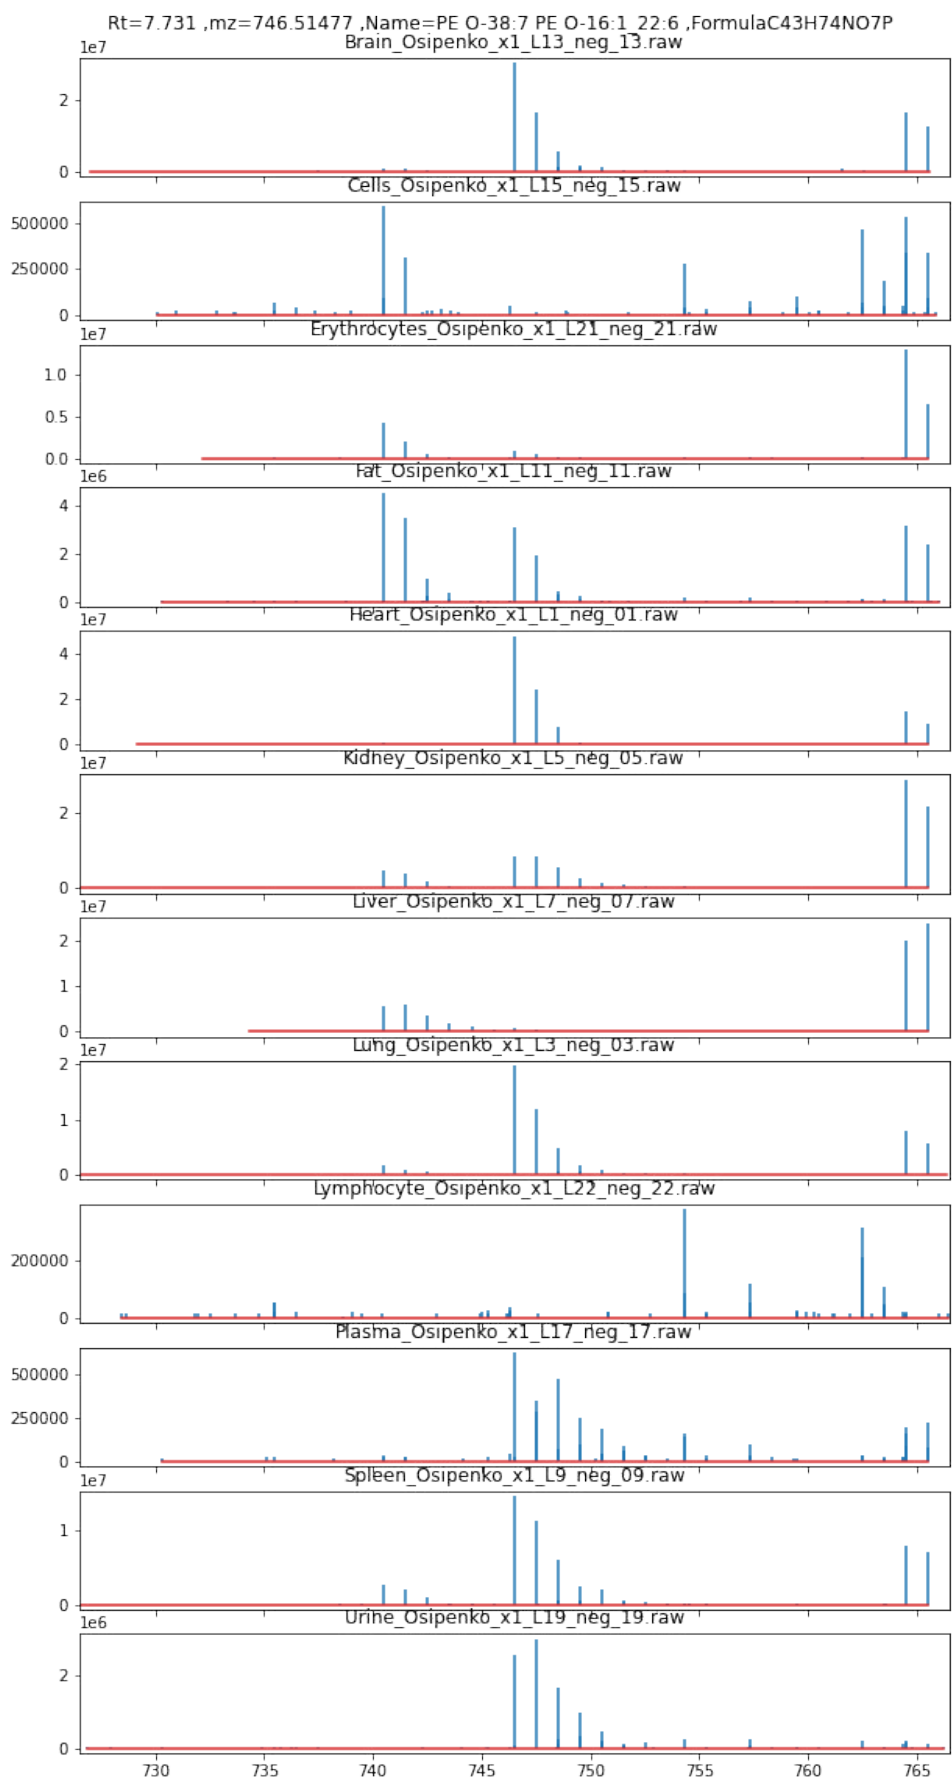

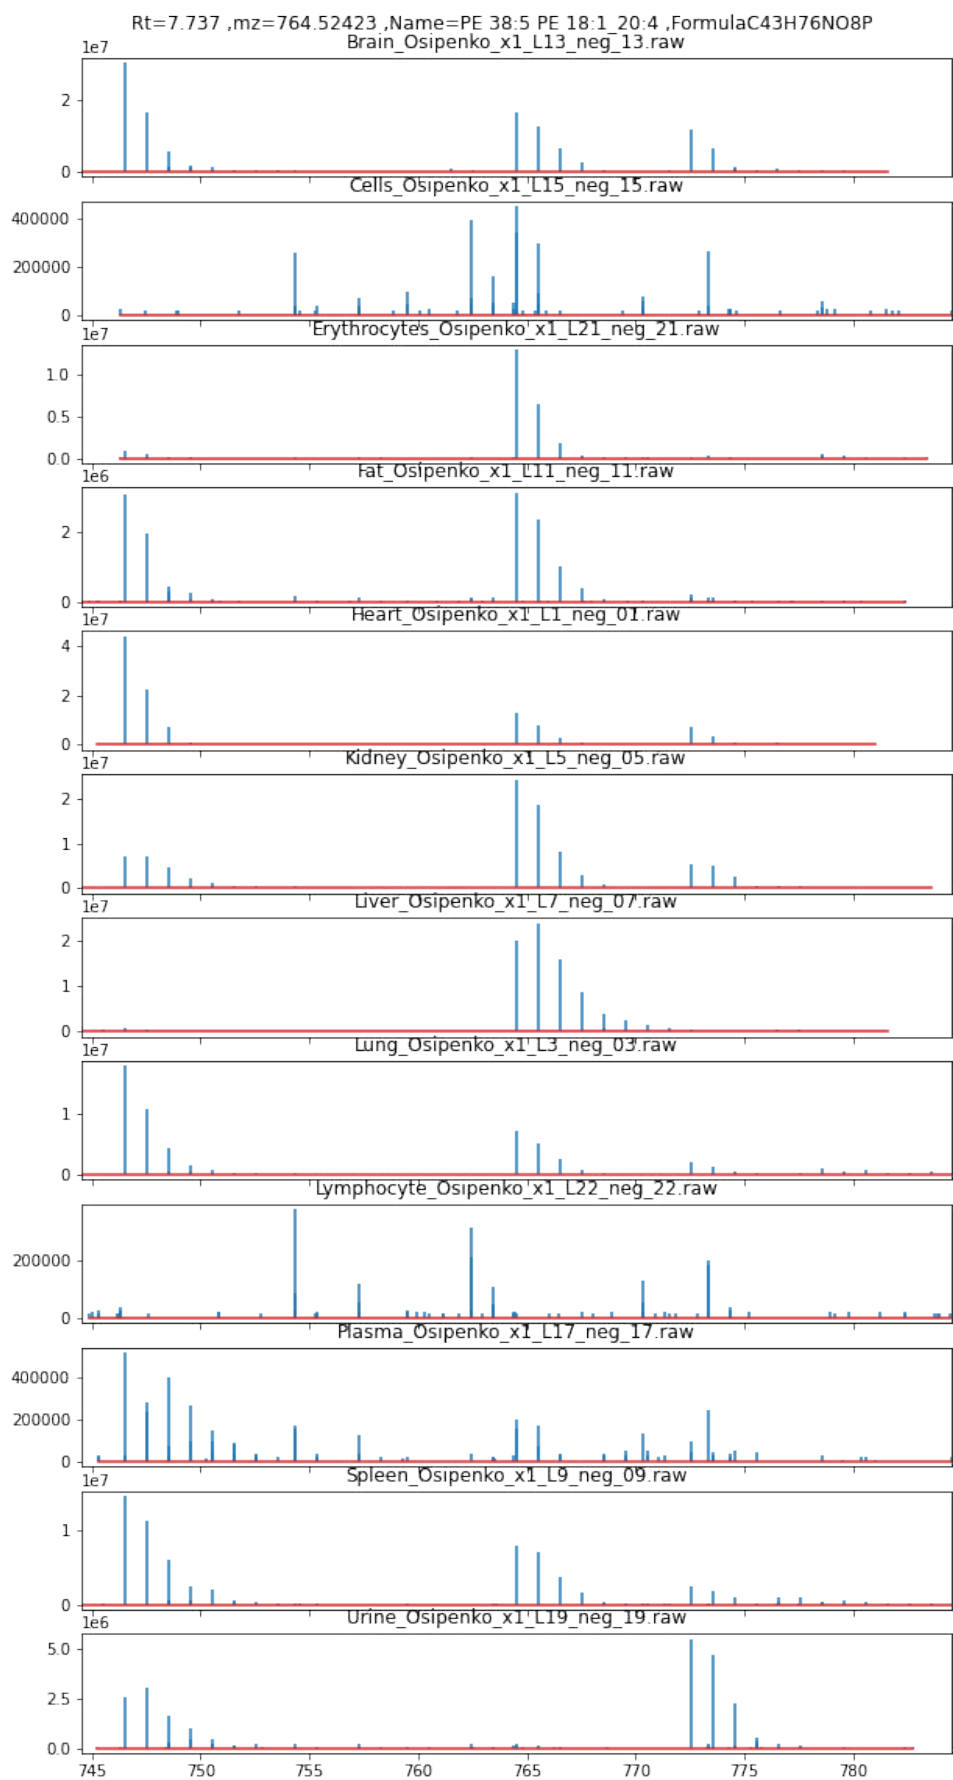

Rt=7.762 ,mz=876.61334 ,Name=SHexCer 41:1 O2 ,FormulaC47H91NO11S

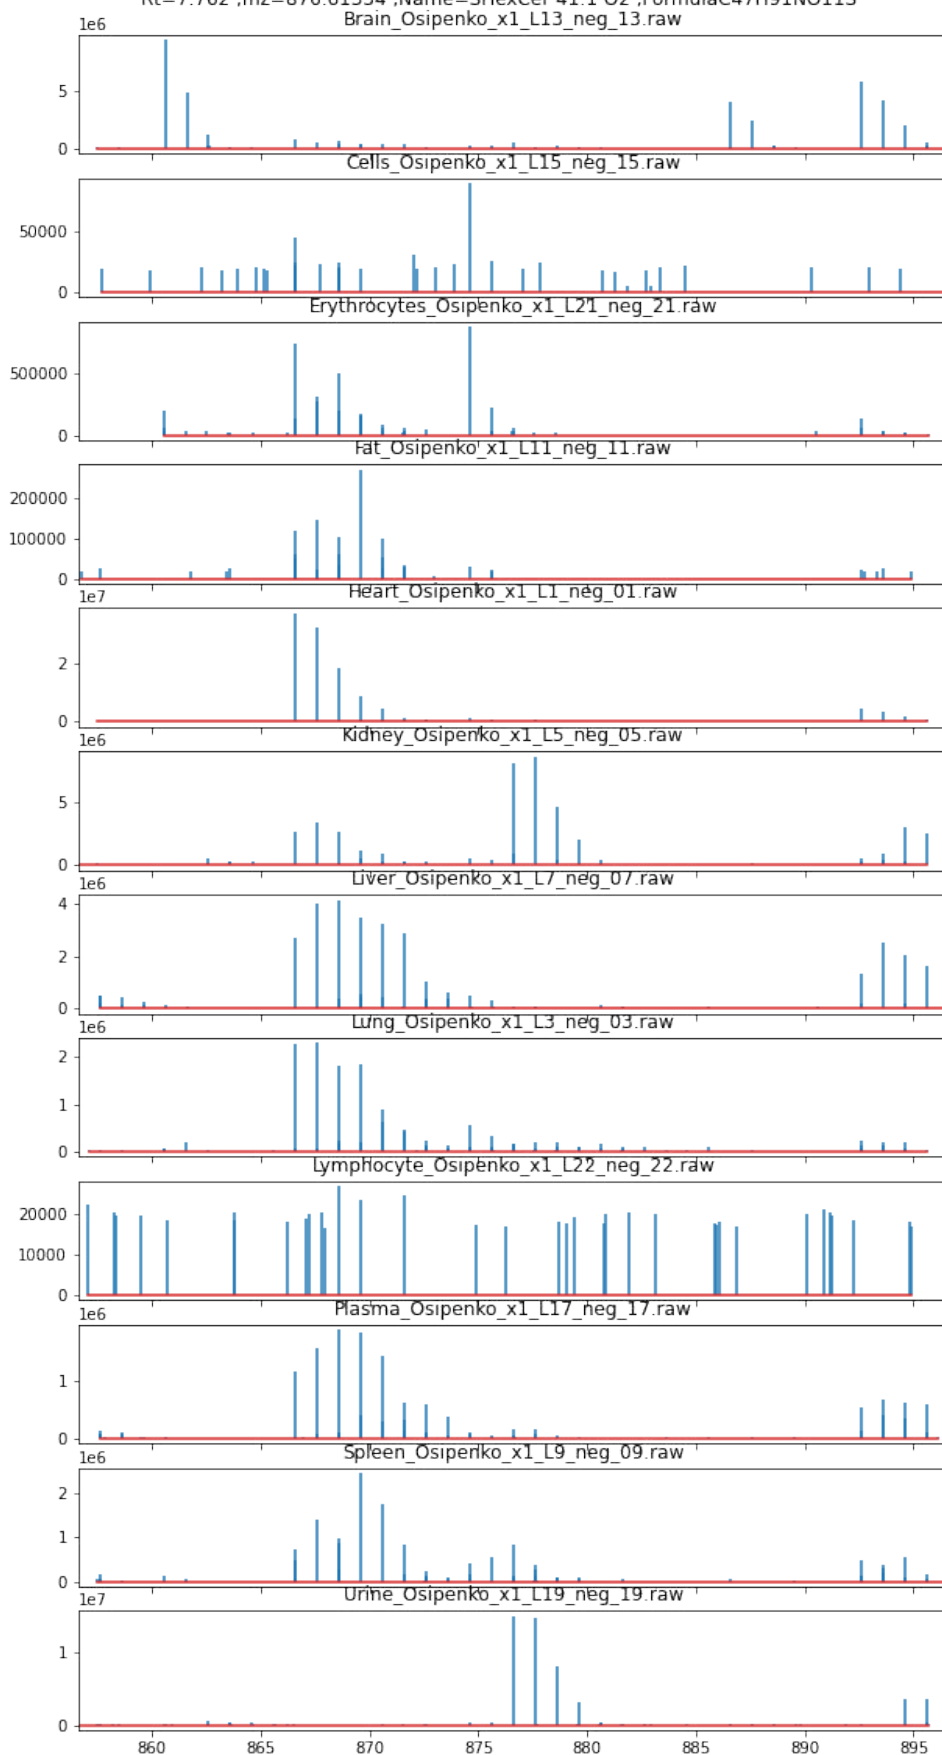

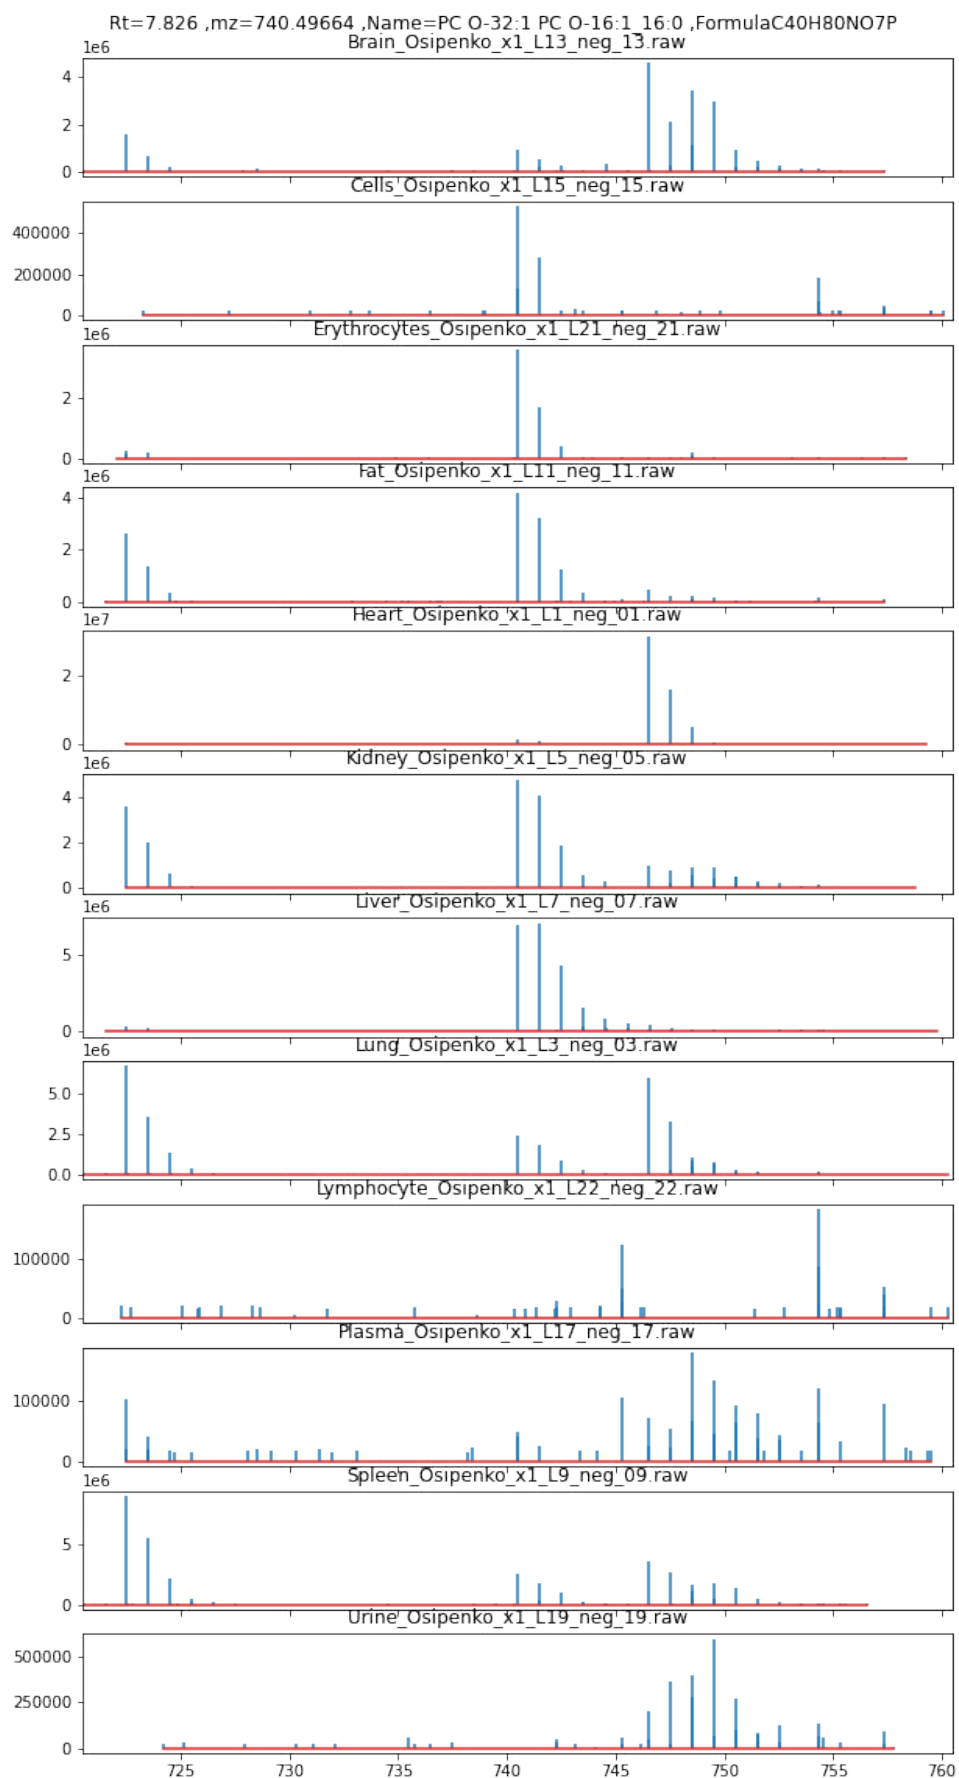



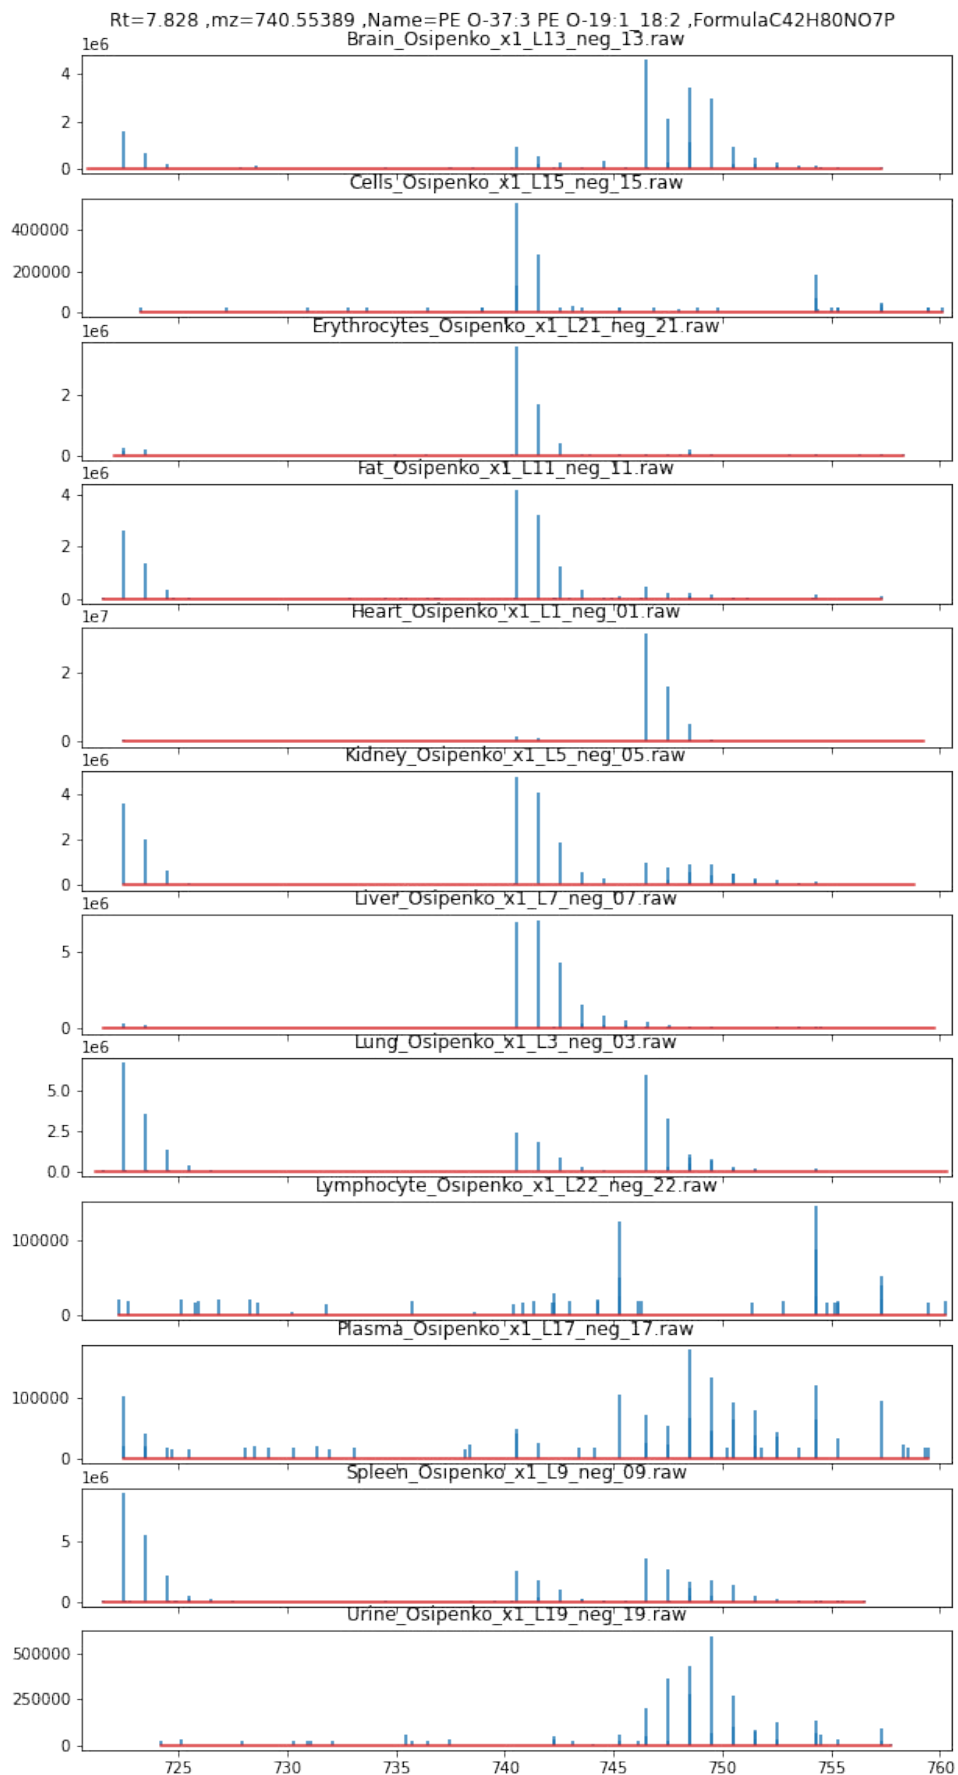

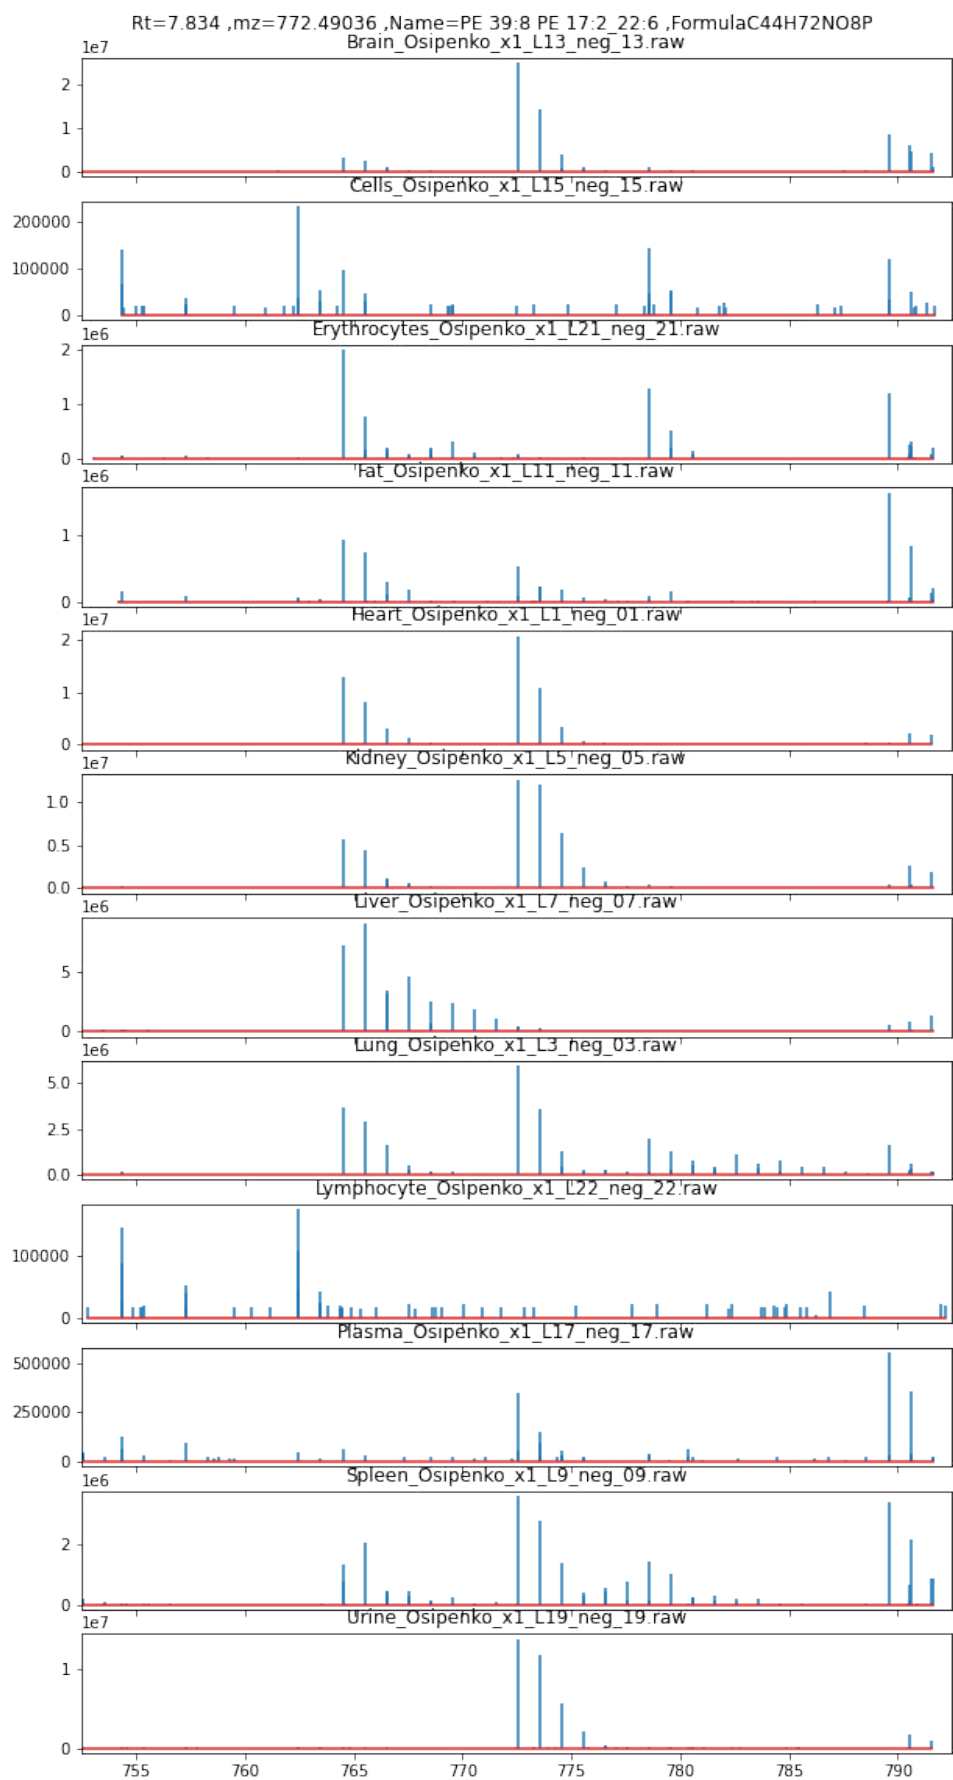

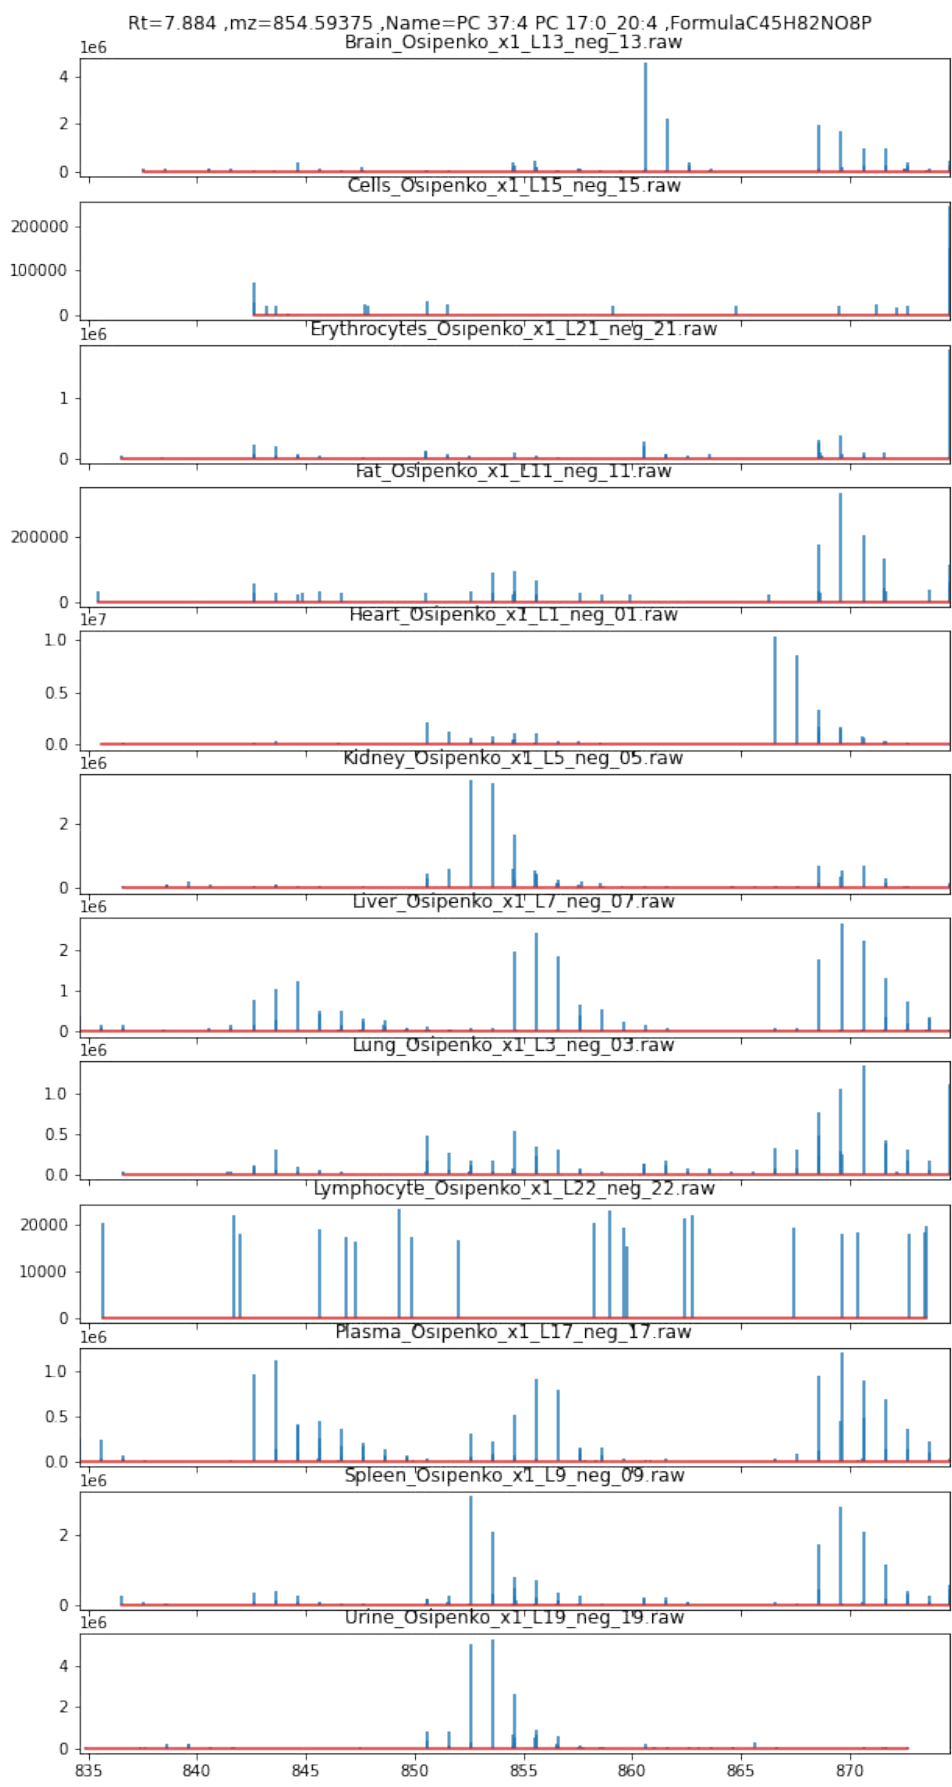

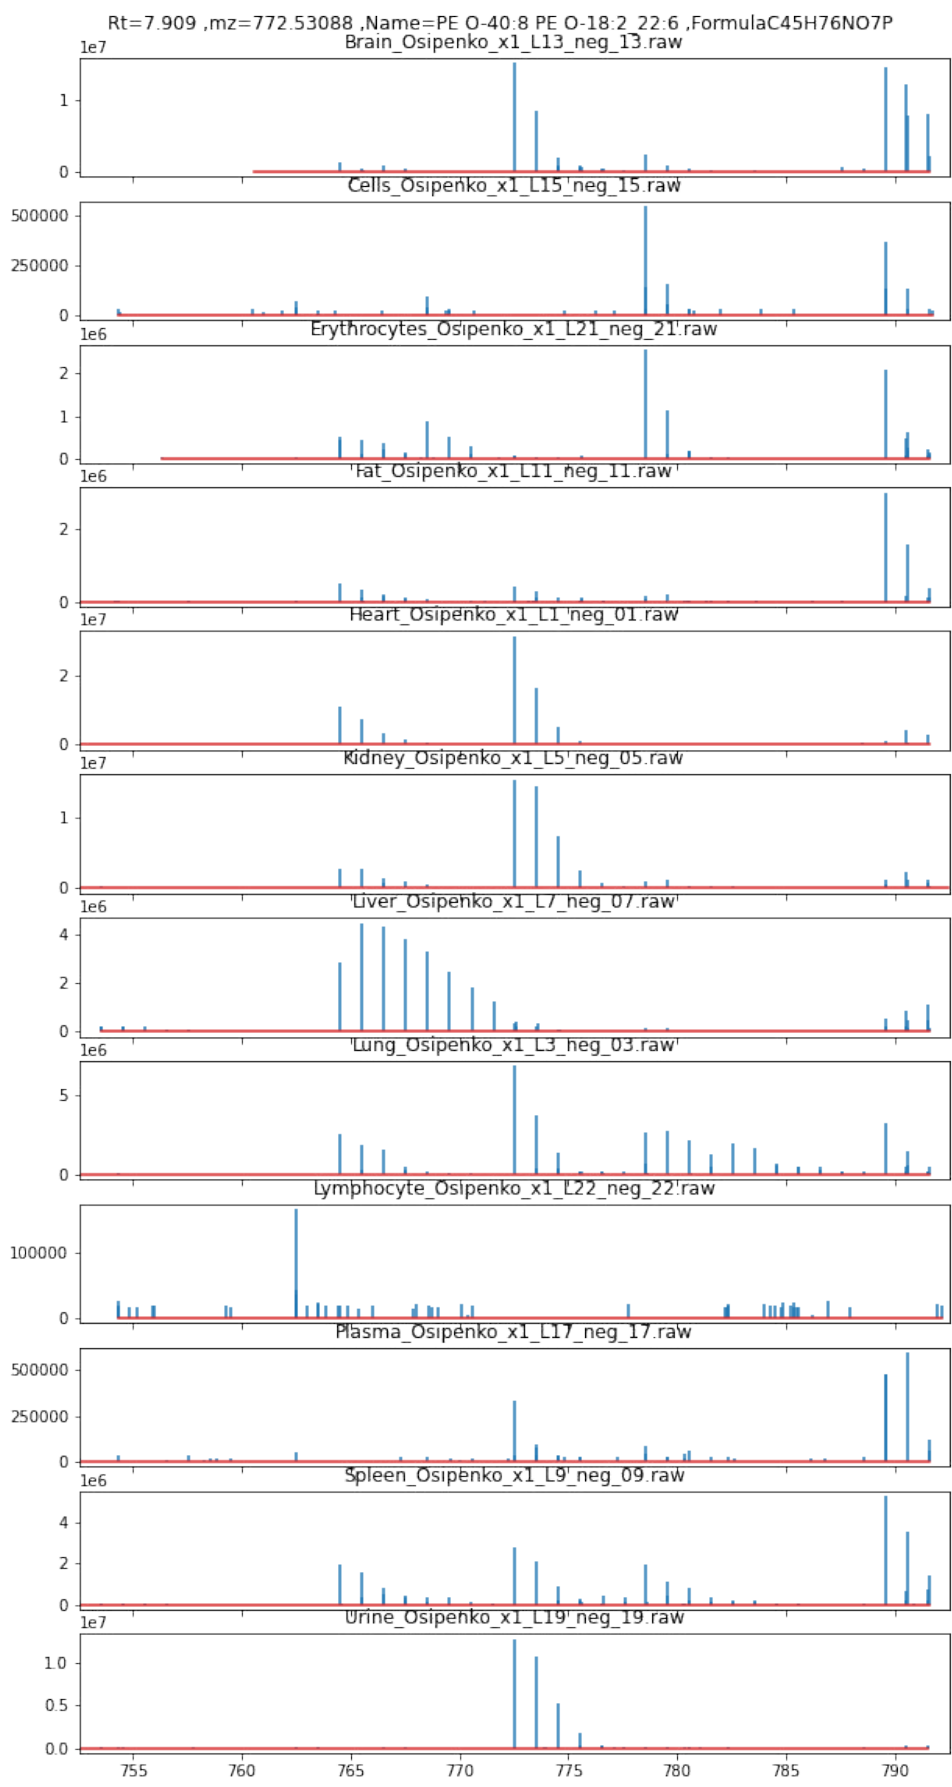

Rt=7.933 ,mz=868.60687 ,Name=PC 38:4 PC 18:1 20:3 ,FormulaC46H84NO8P  
Brain\_Osipenko\_x1\_L13\_neg\_13.raw

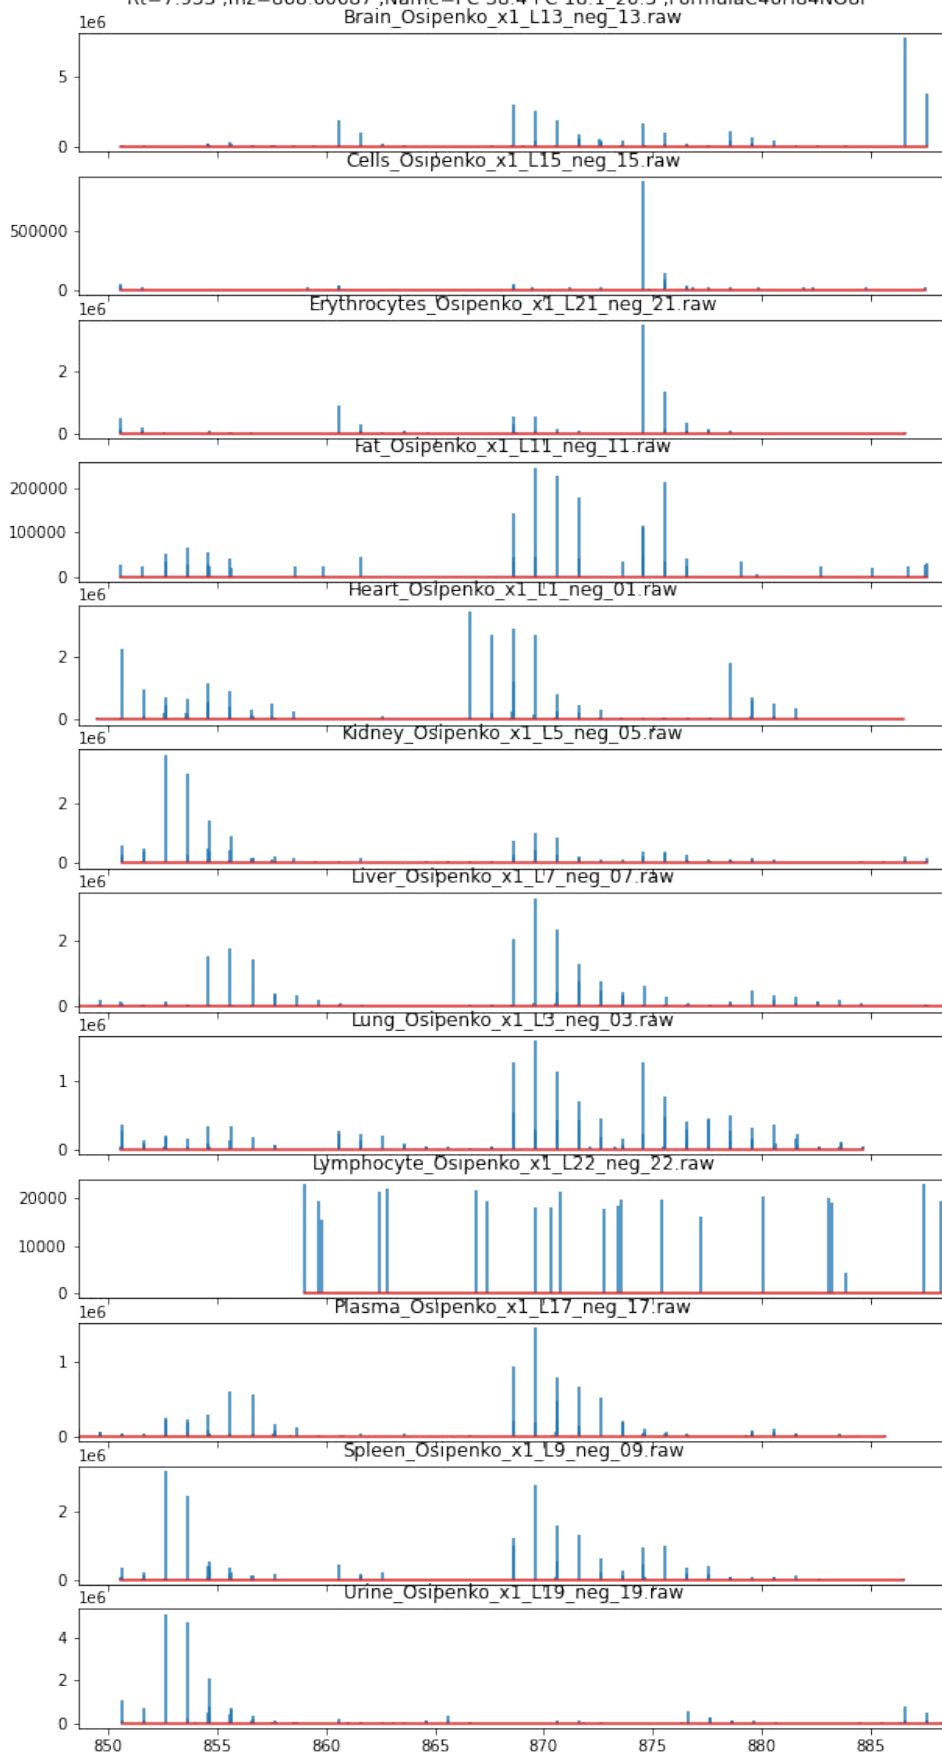

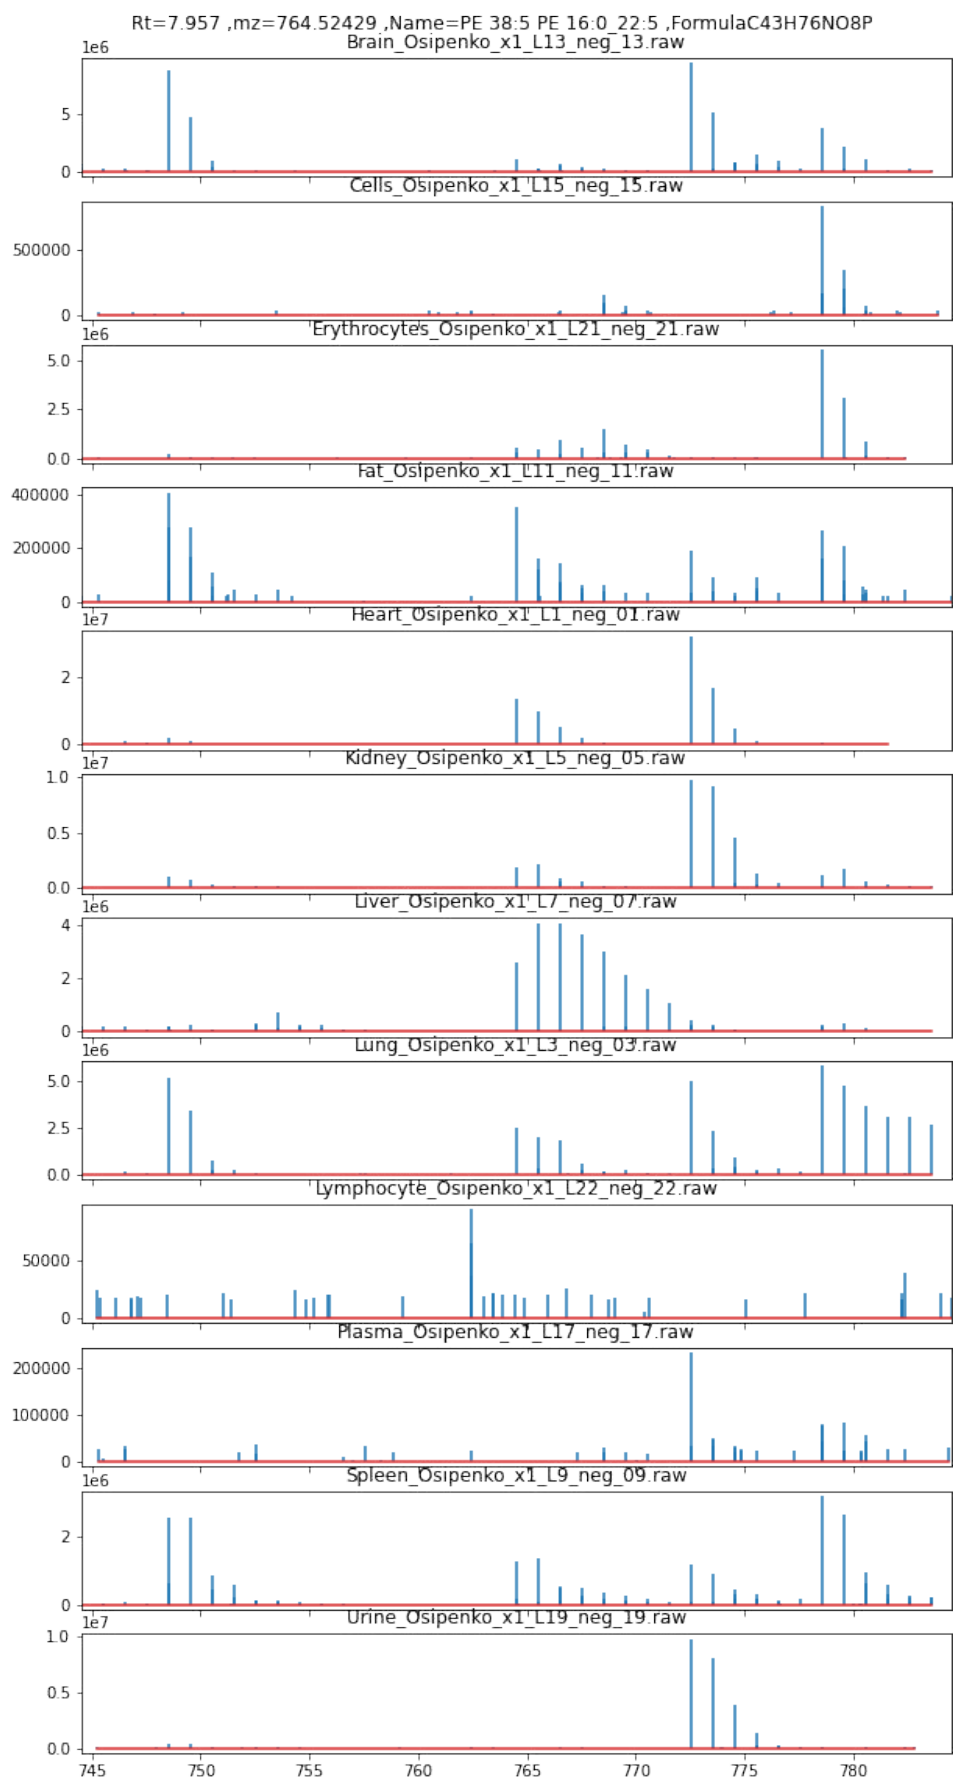

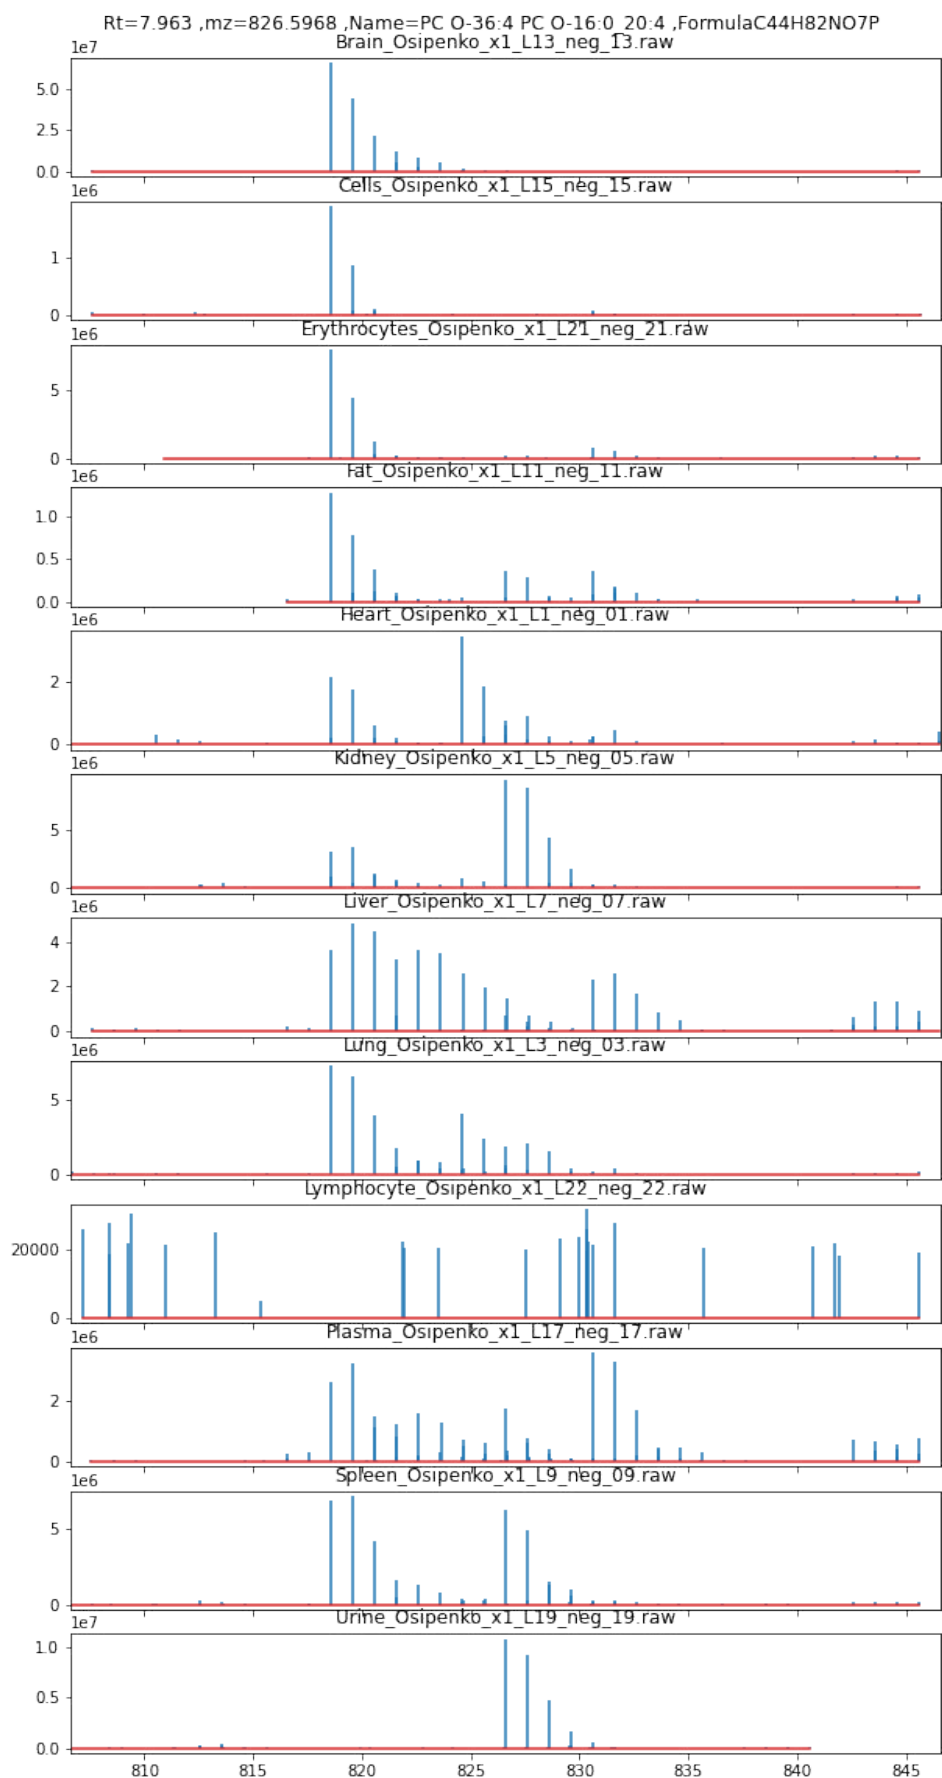

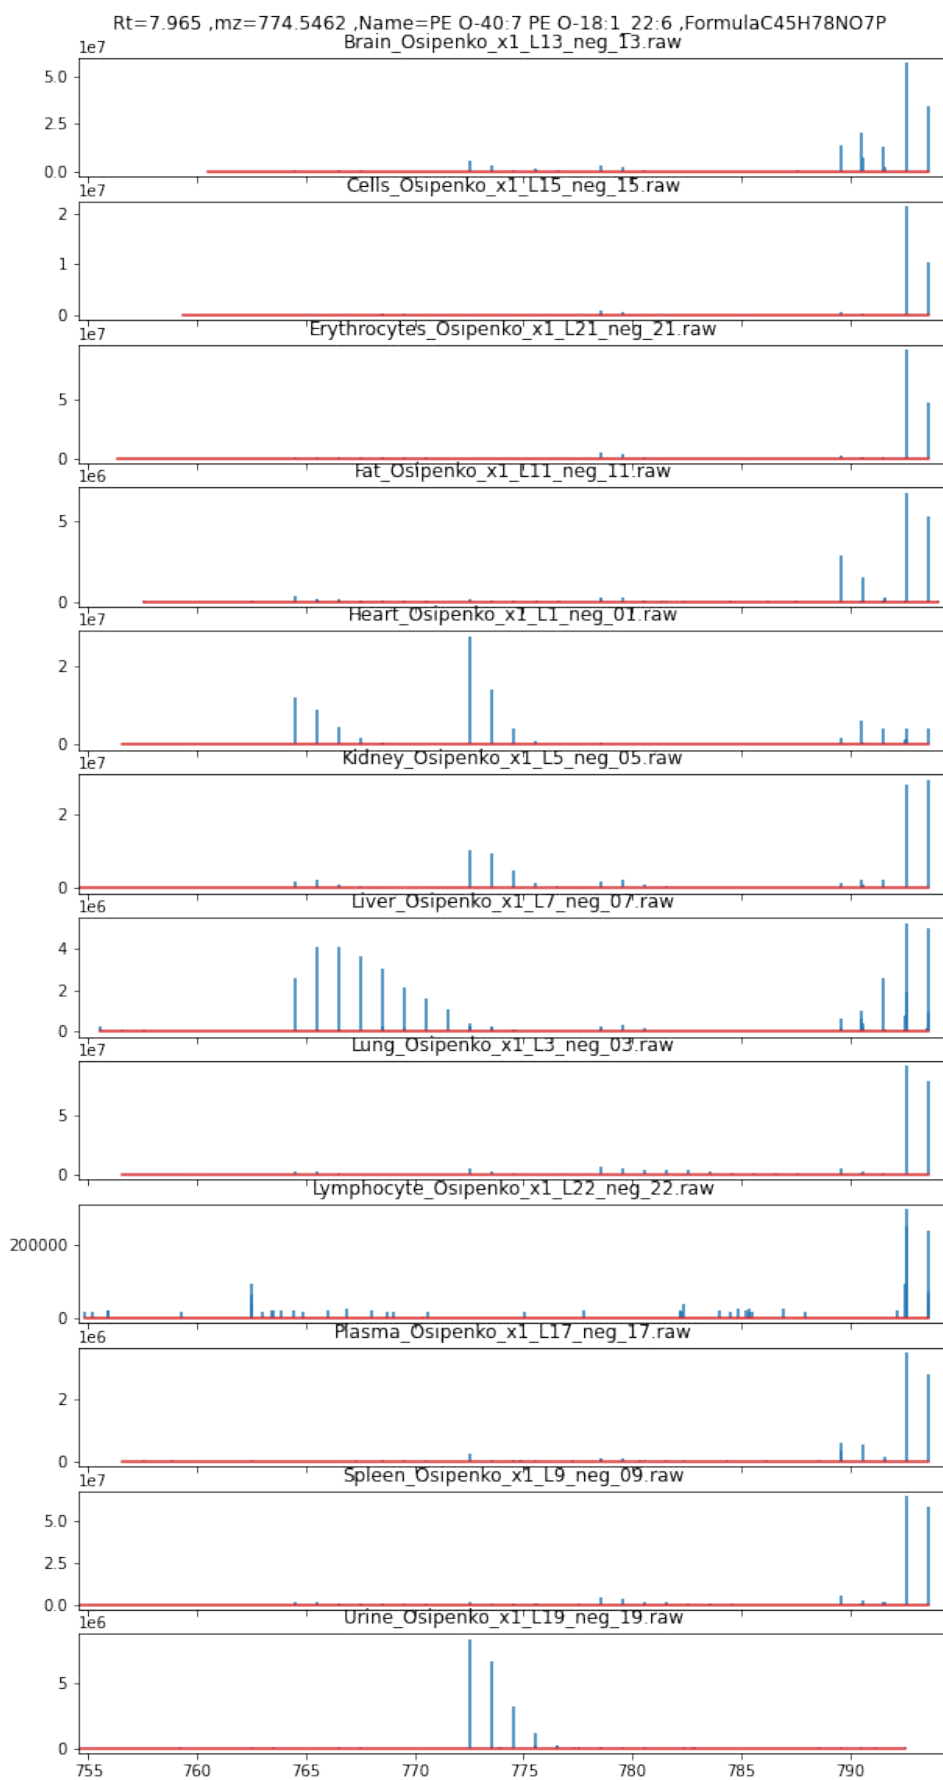



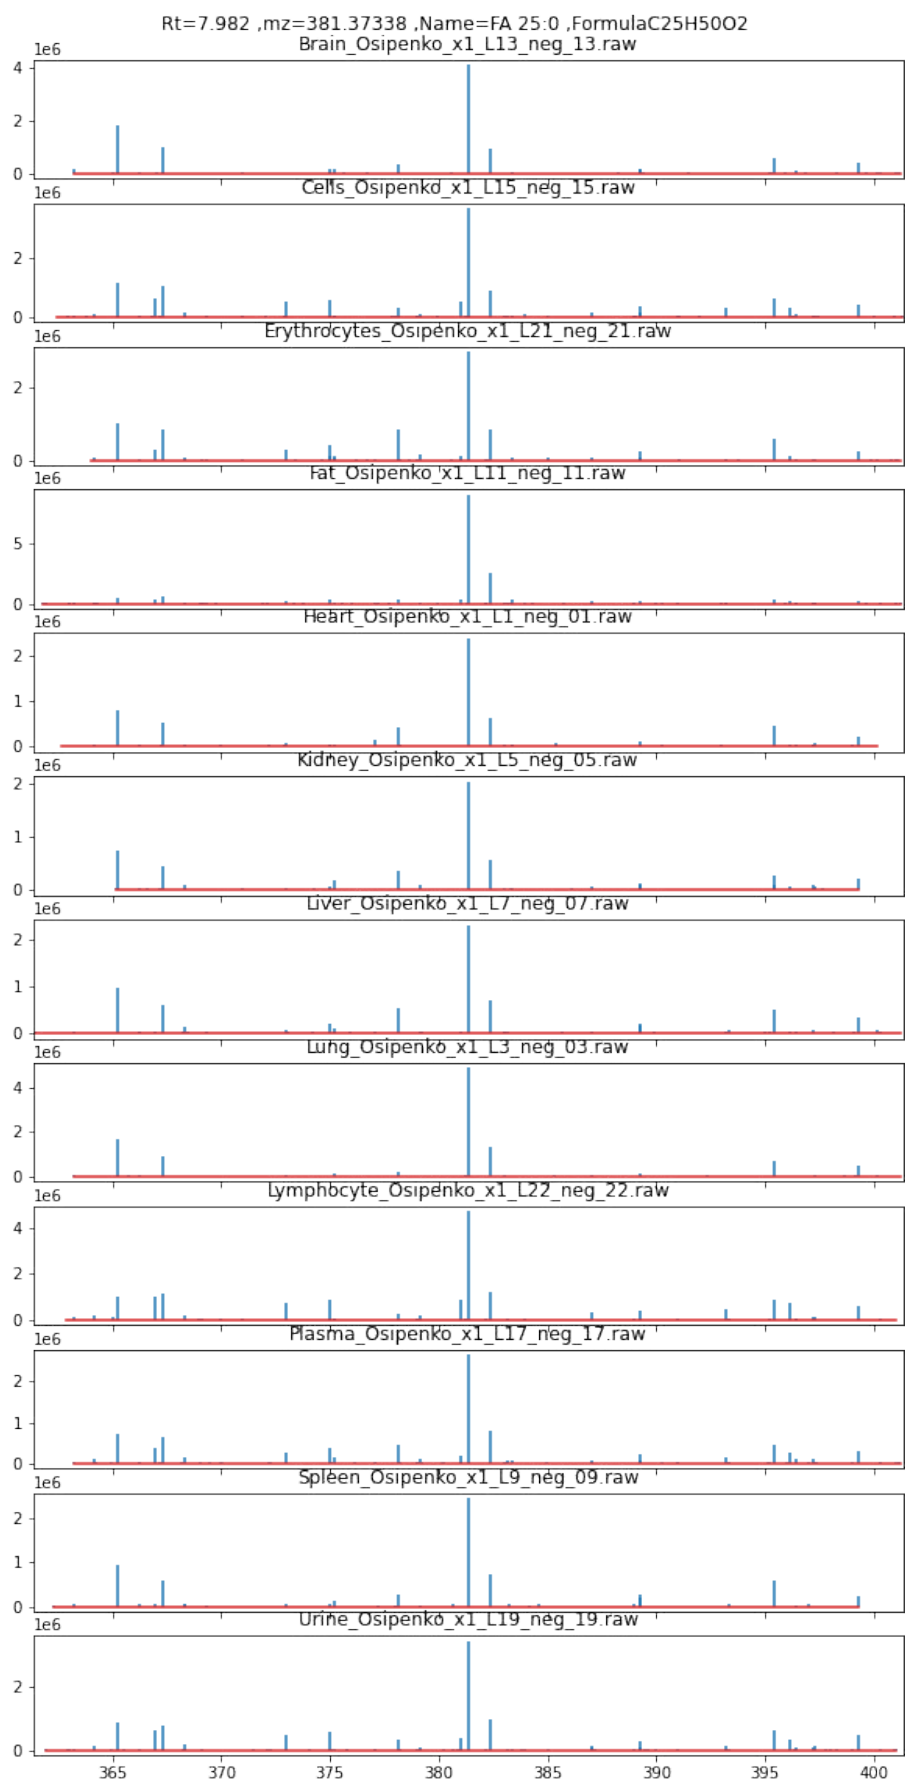

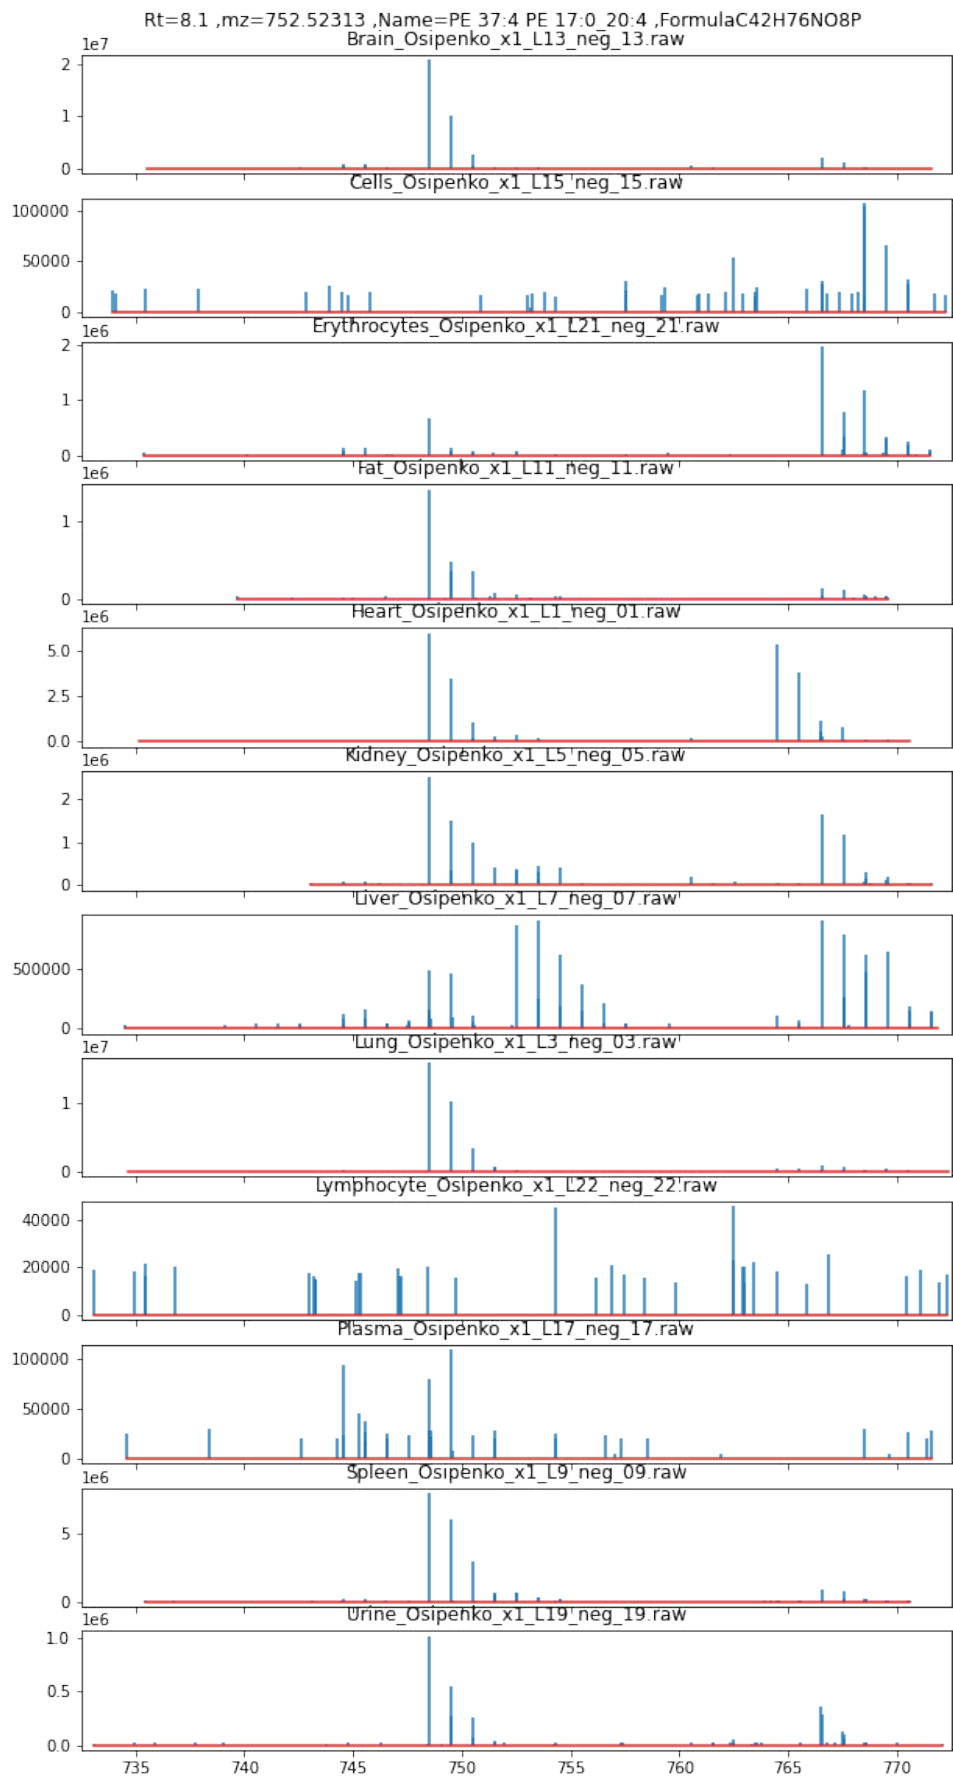

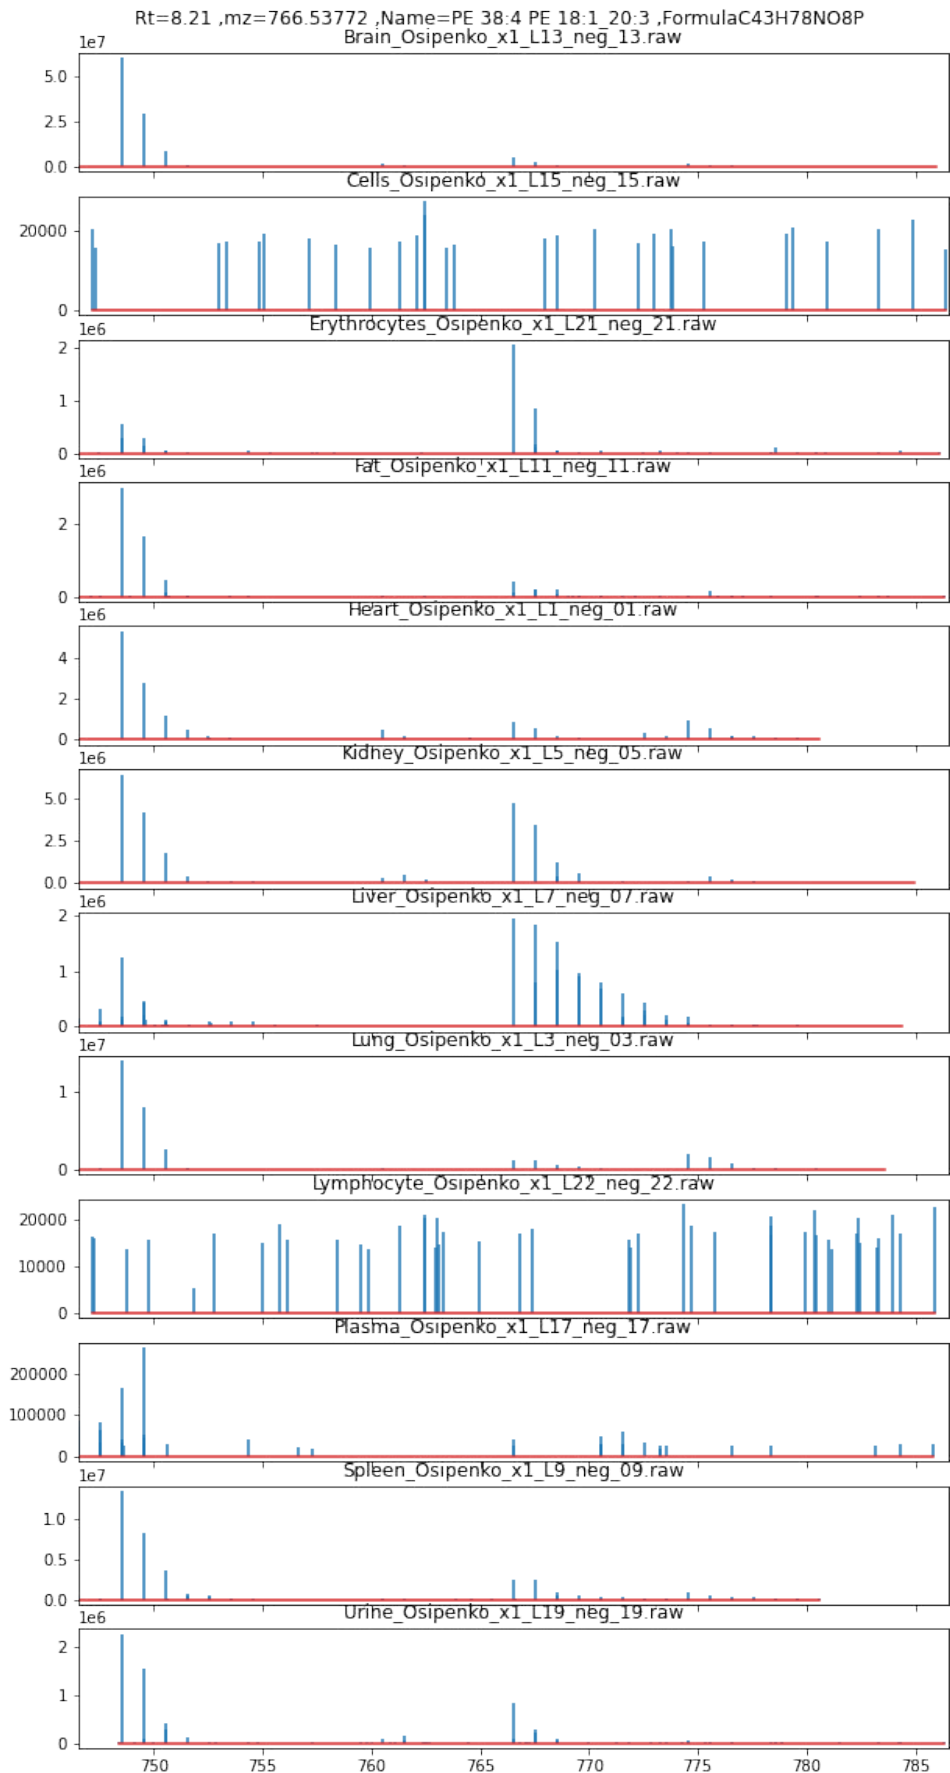

Rt=8.23 ,mz=536.50519 ,Name=Cer 34:1 O2 Cer 18:1 O2 16:0 ,FormulaC34H67NO3  
Brain\_Osipenko\_x1\_L13\_neg\_13.raw

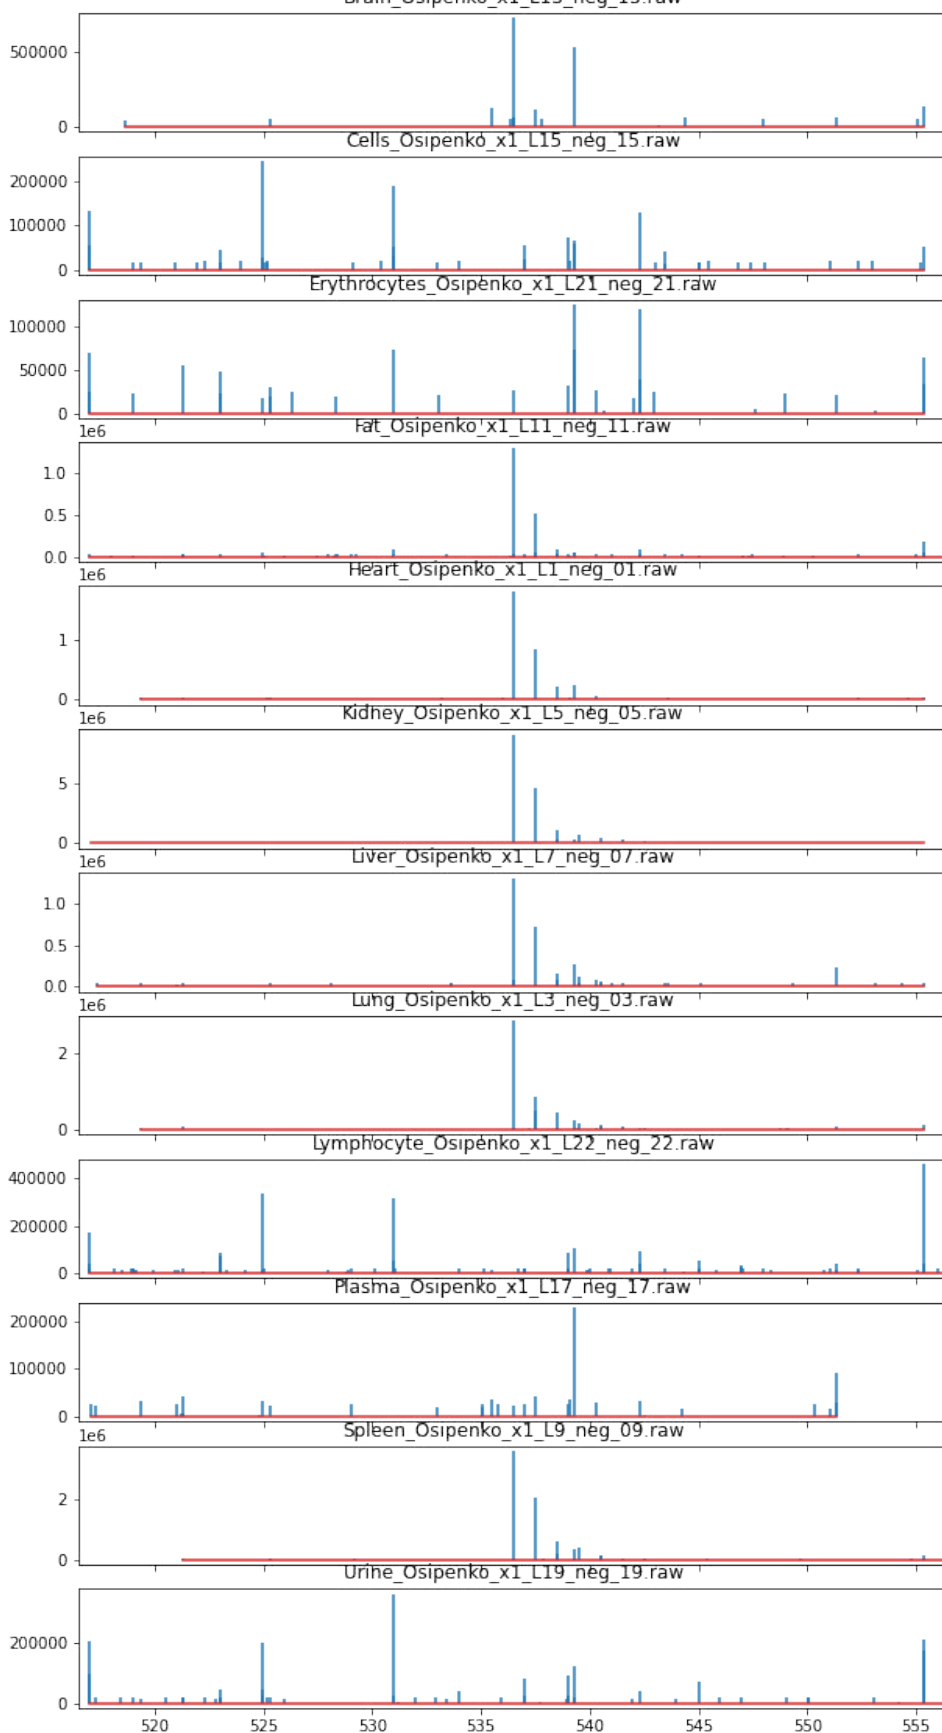

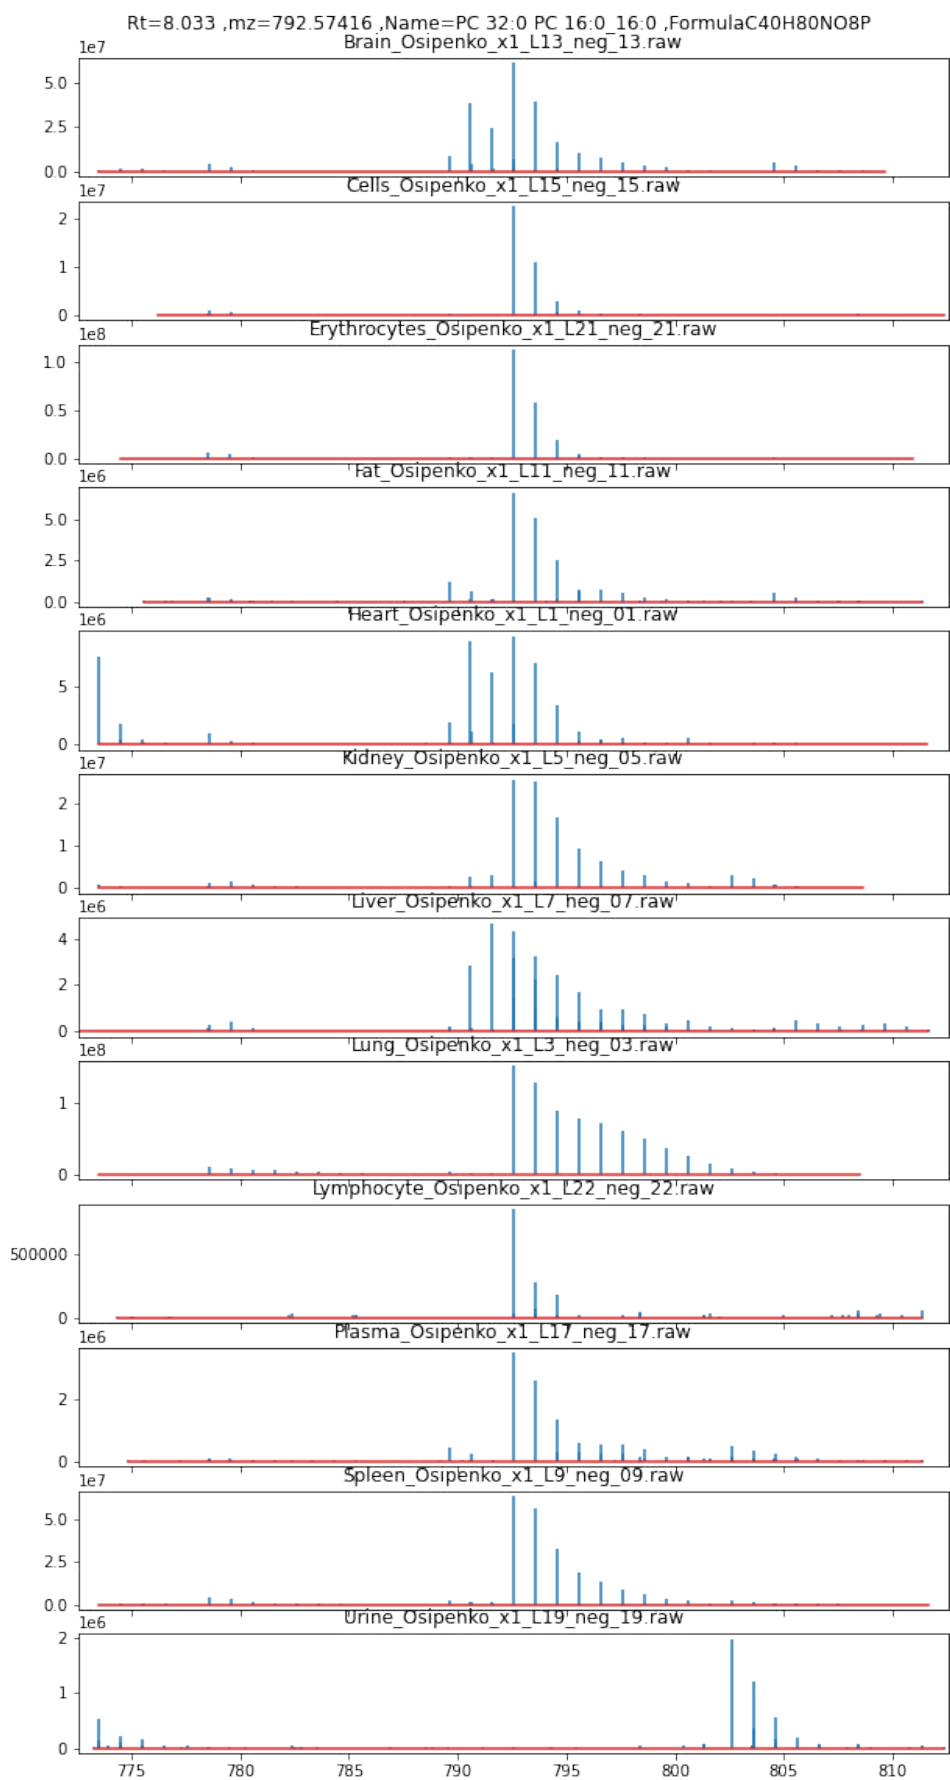

Rt=8.048 ,mz=818.56982 ,Name=PC 33:2 O PC 18:1 15:1 O ,FormulaC41H78NO9P  
Brain\_Osipenko\_x1\_L13\_neg\_13.raw

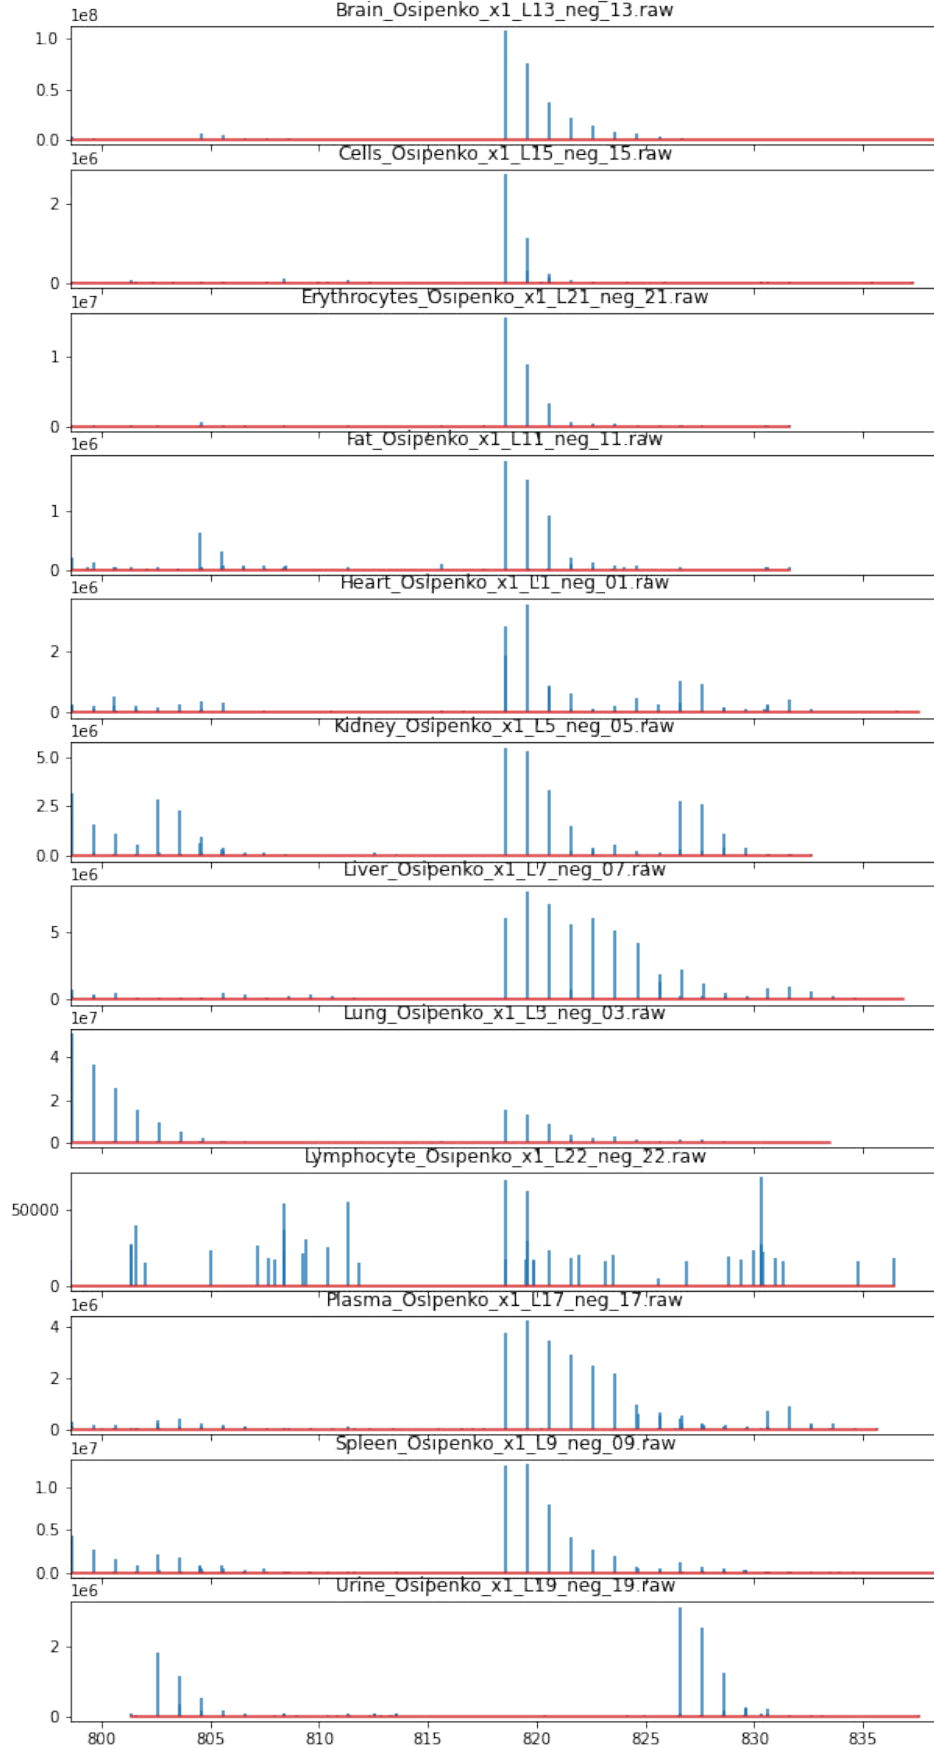

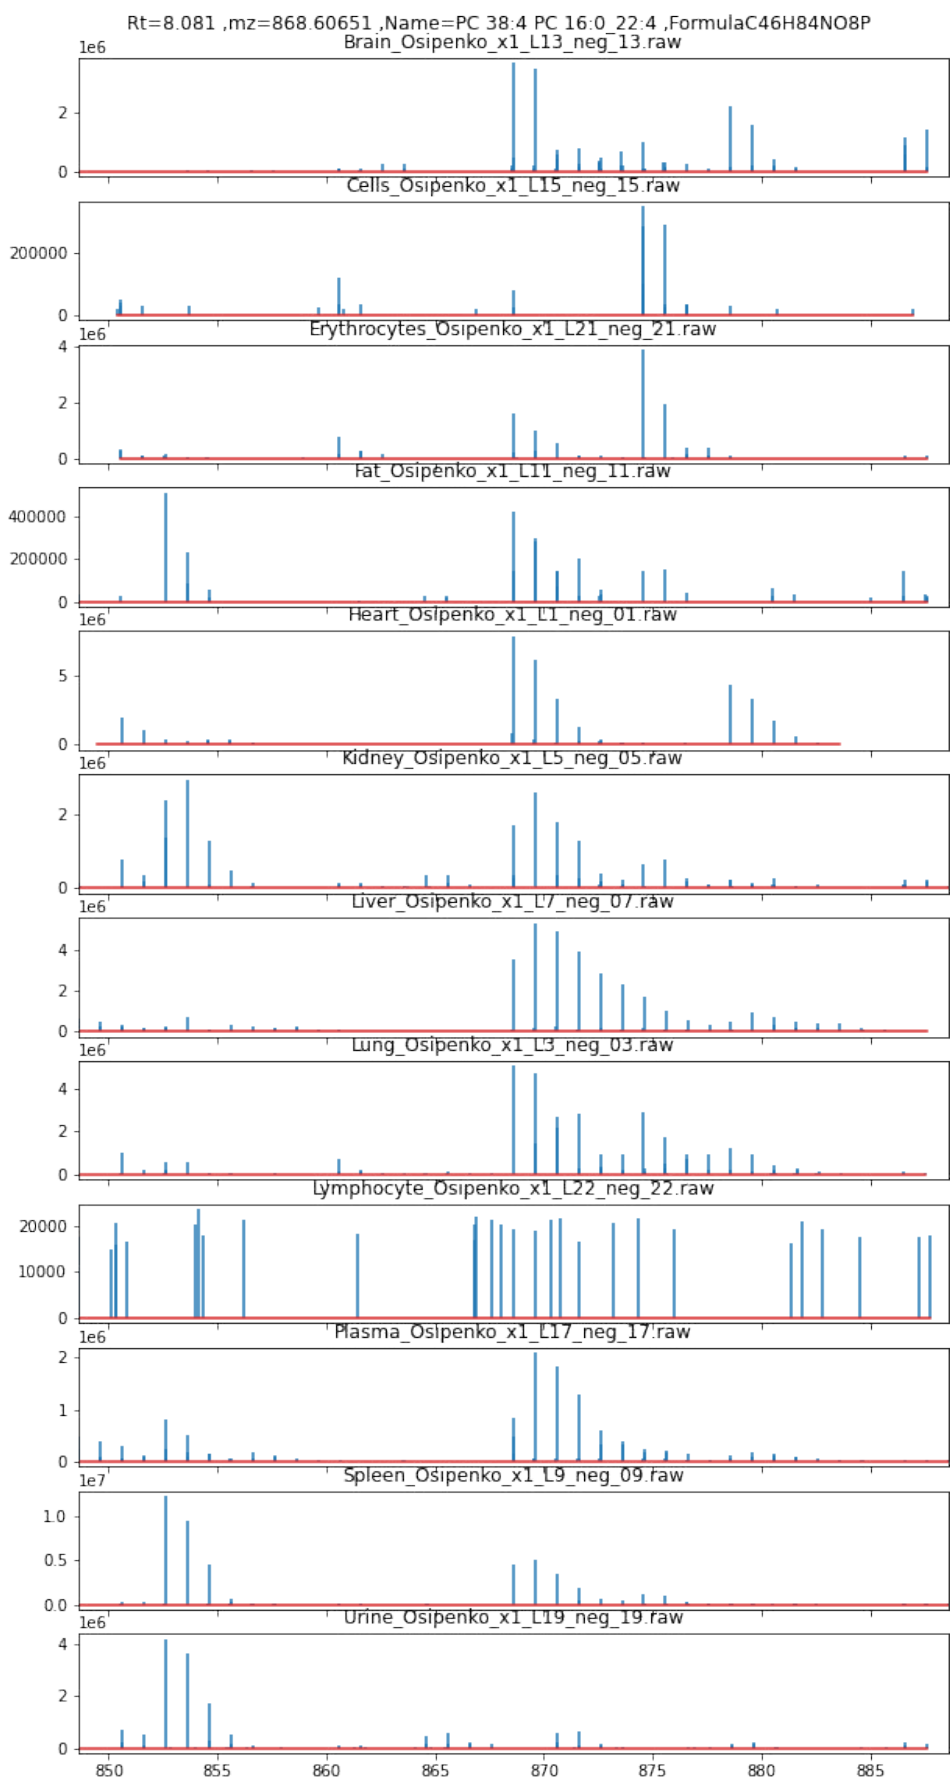

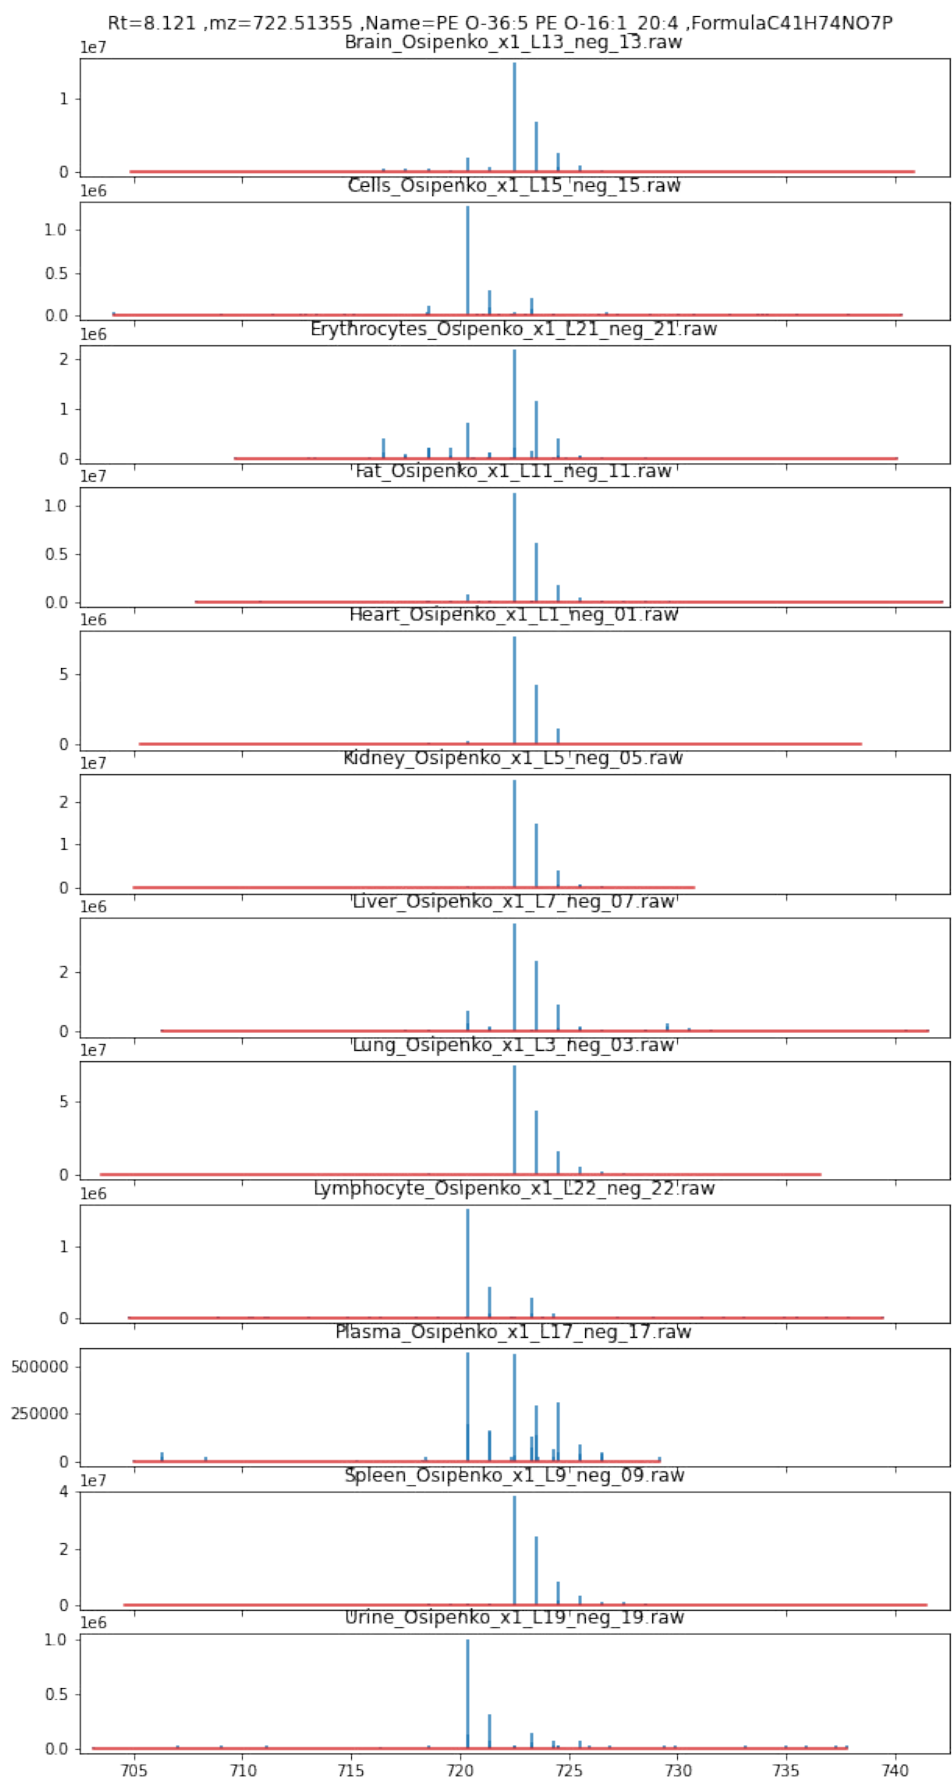



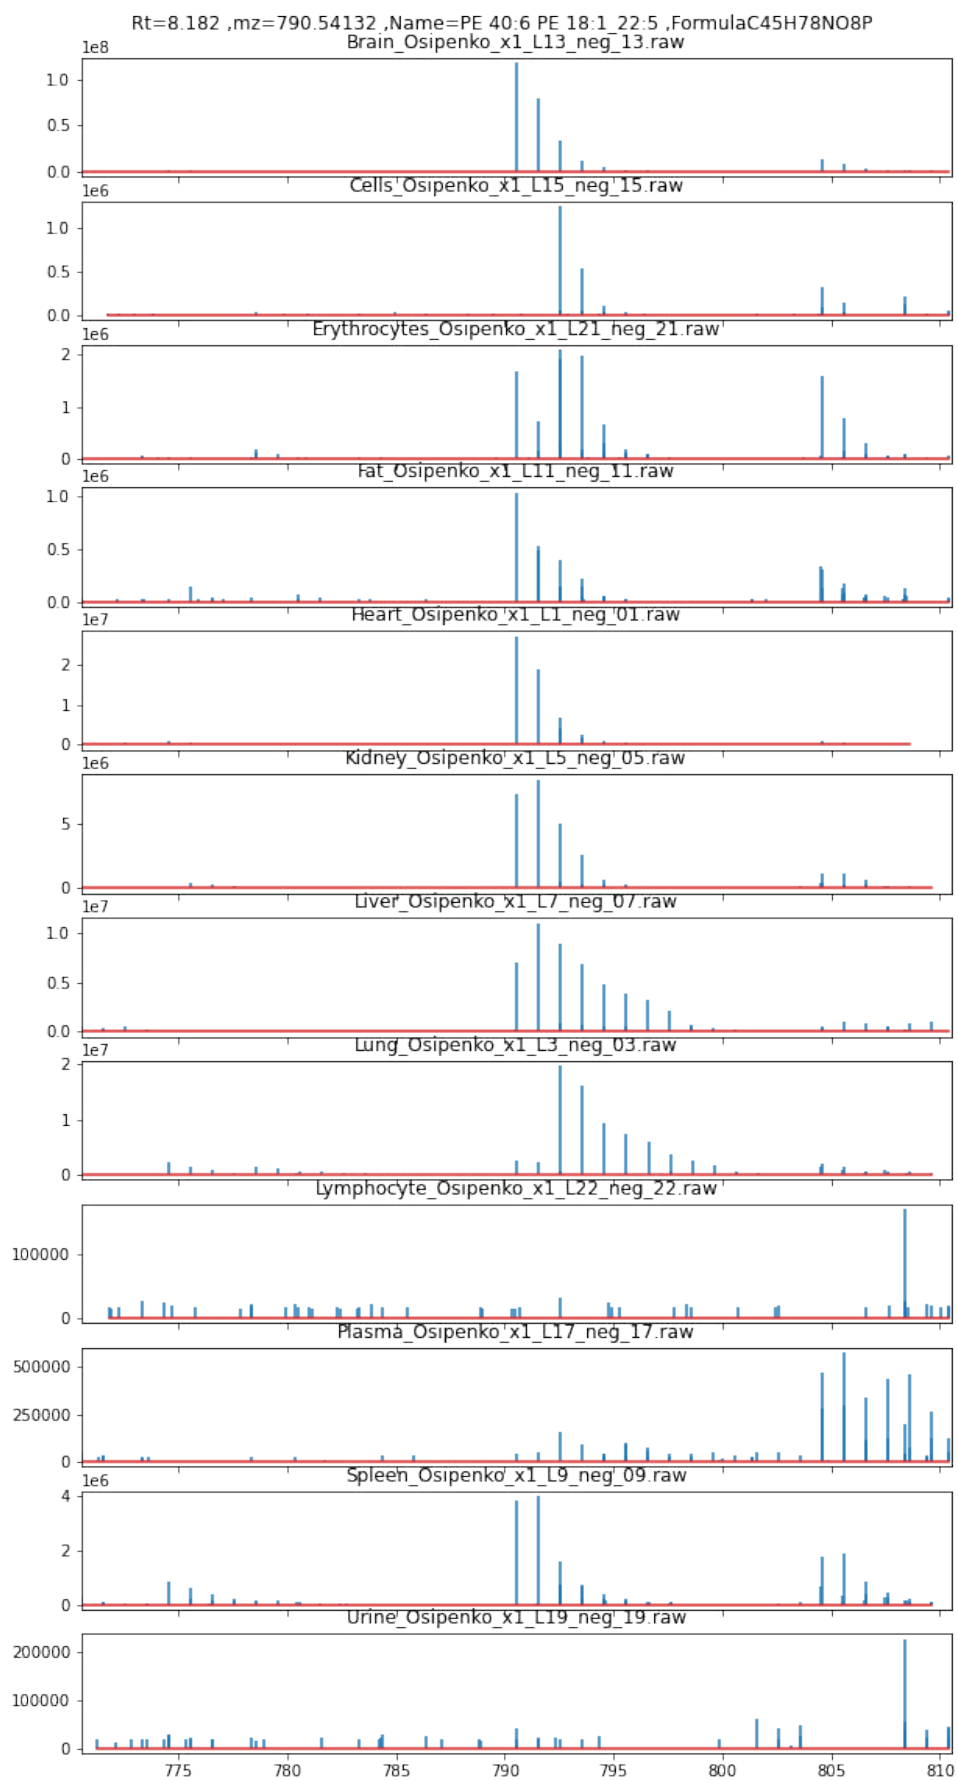

Rt=8.291 ,mz=818.59167 ,Name=PC O-34:2 O PC O-17:1 17:1 O ,FormulaC42H82NO8P  
Brain\_Osipenko\_x1\_L13\_neg\_13.raw

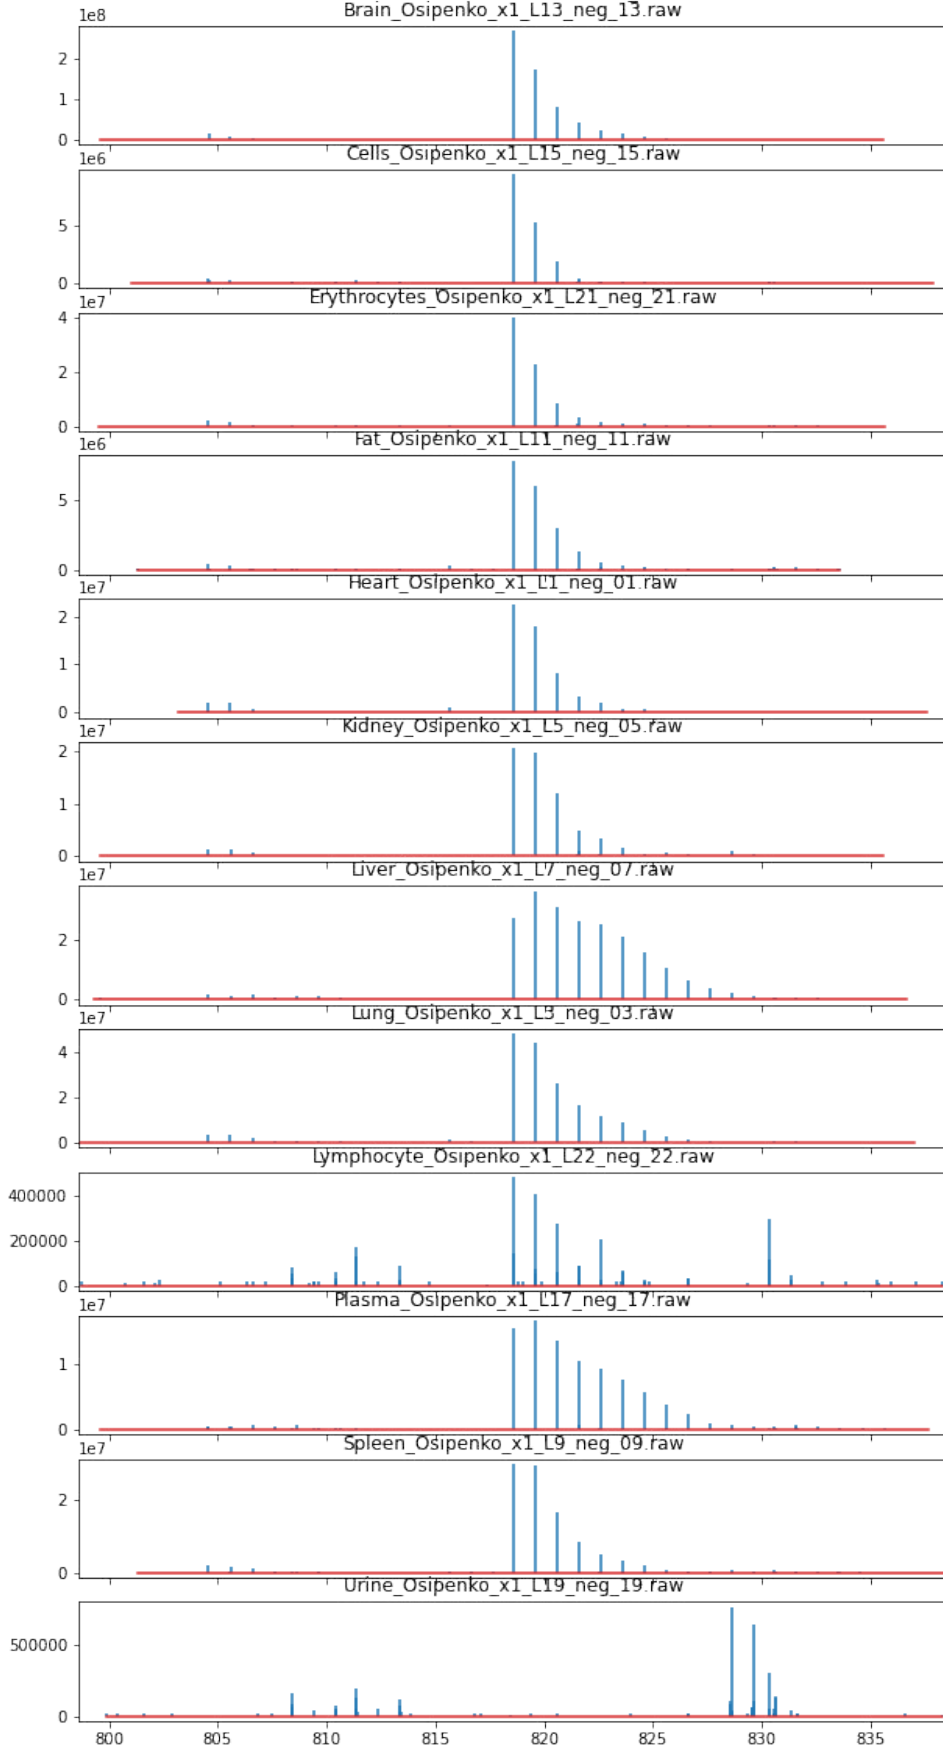

Rt=8.307 ,mz=748.53046 ,Name=PE O-38:6 PE O-18:2 20:4 ,FormulaC43H76NO7P  
Brain\_Osipenko\_x1\_L13\_neg\_13.raw

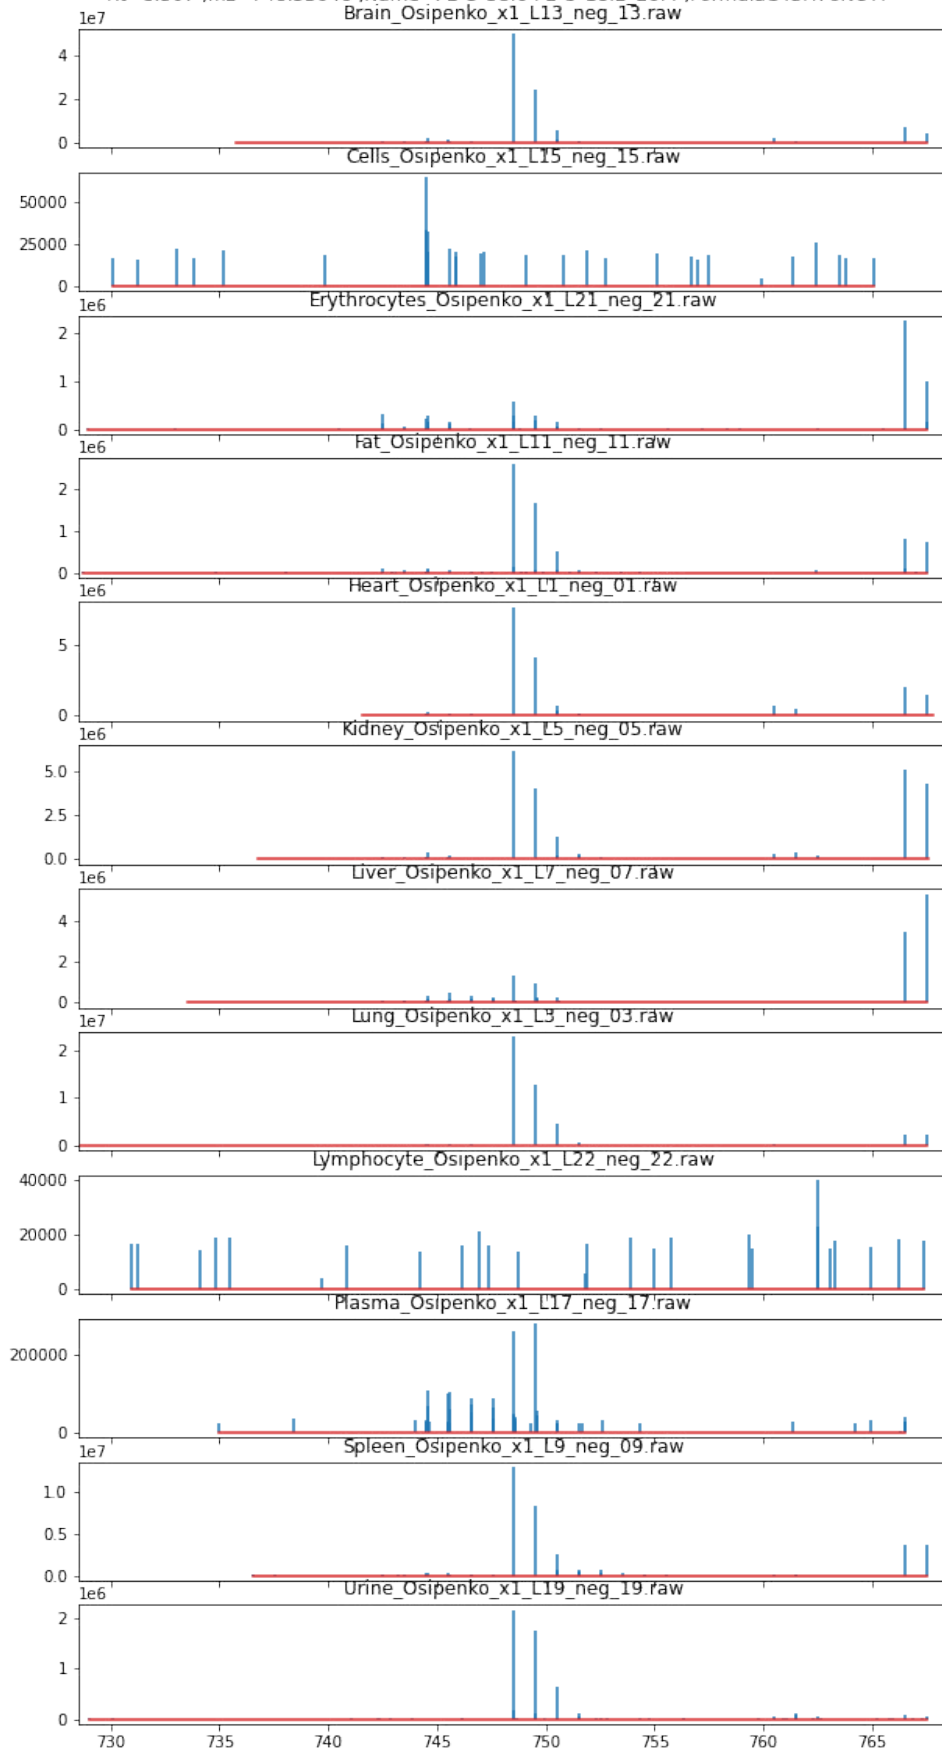

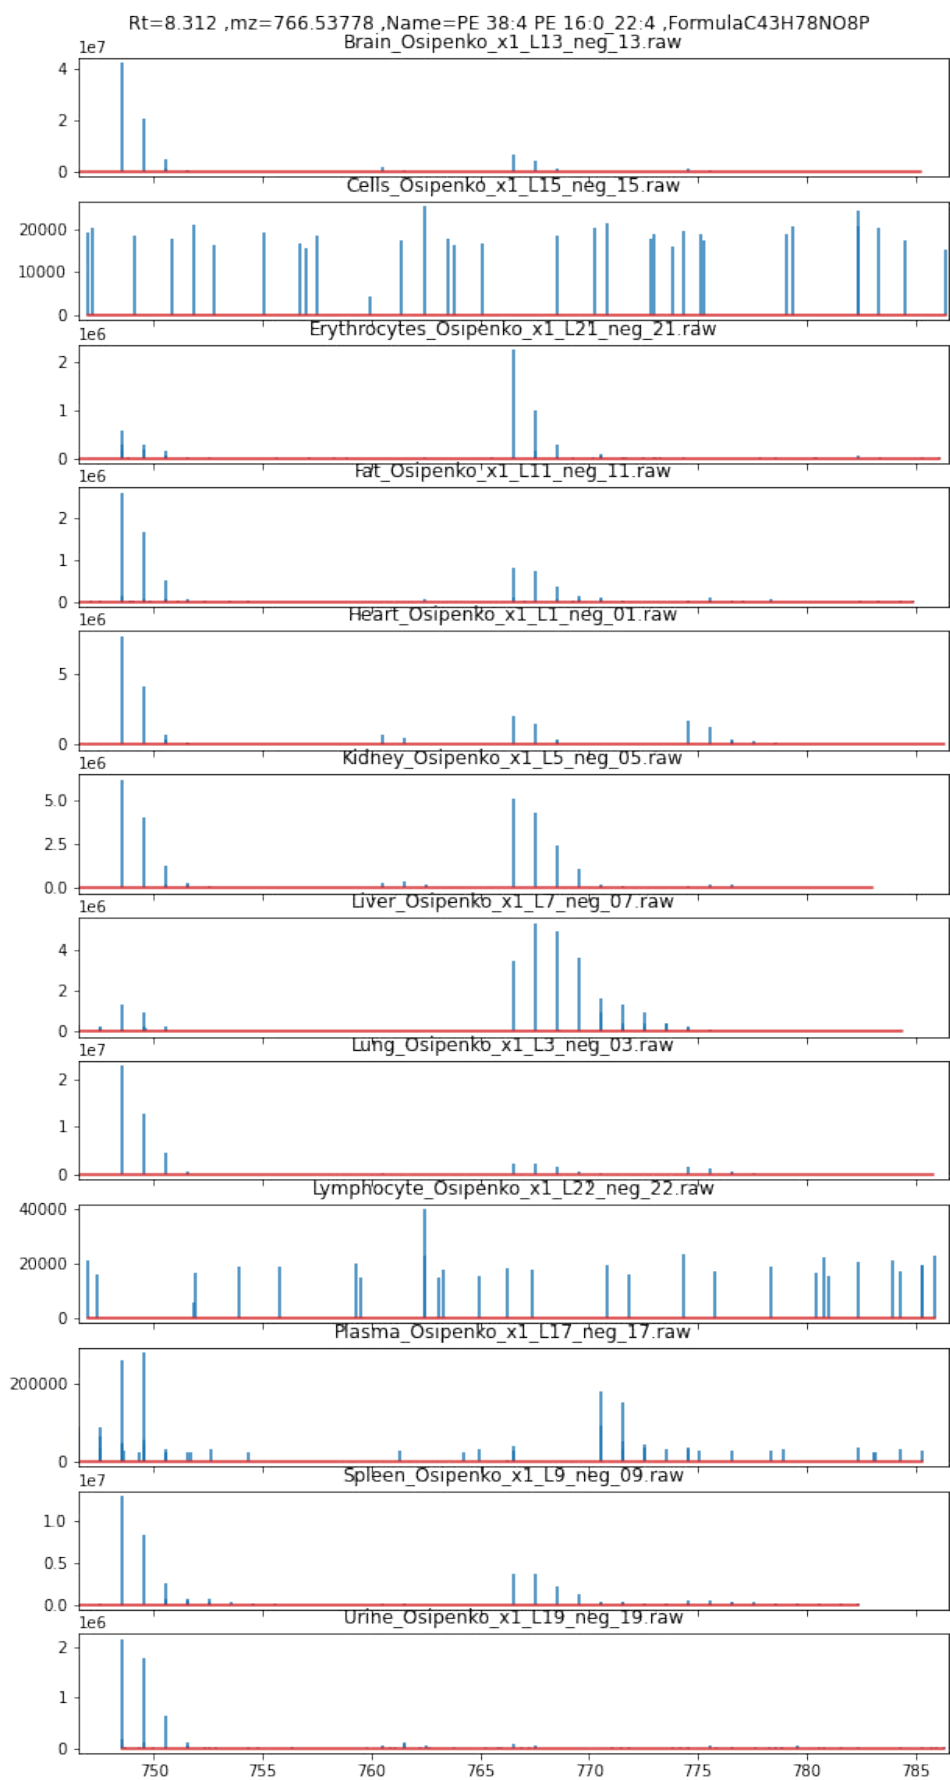

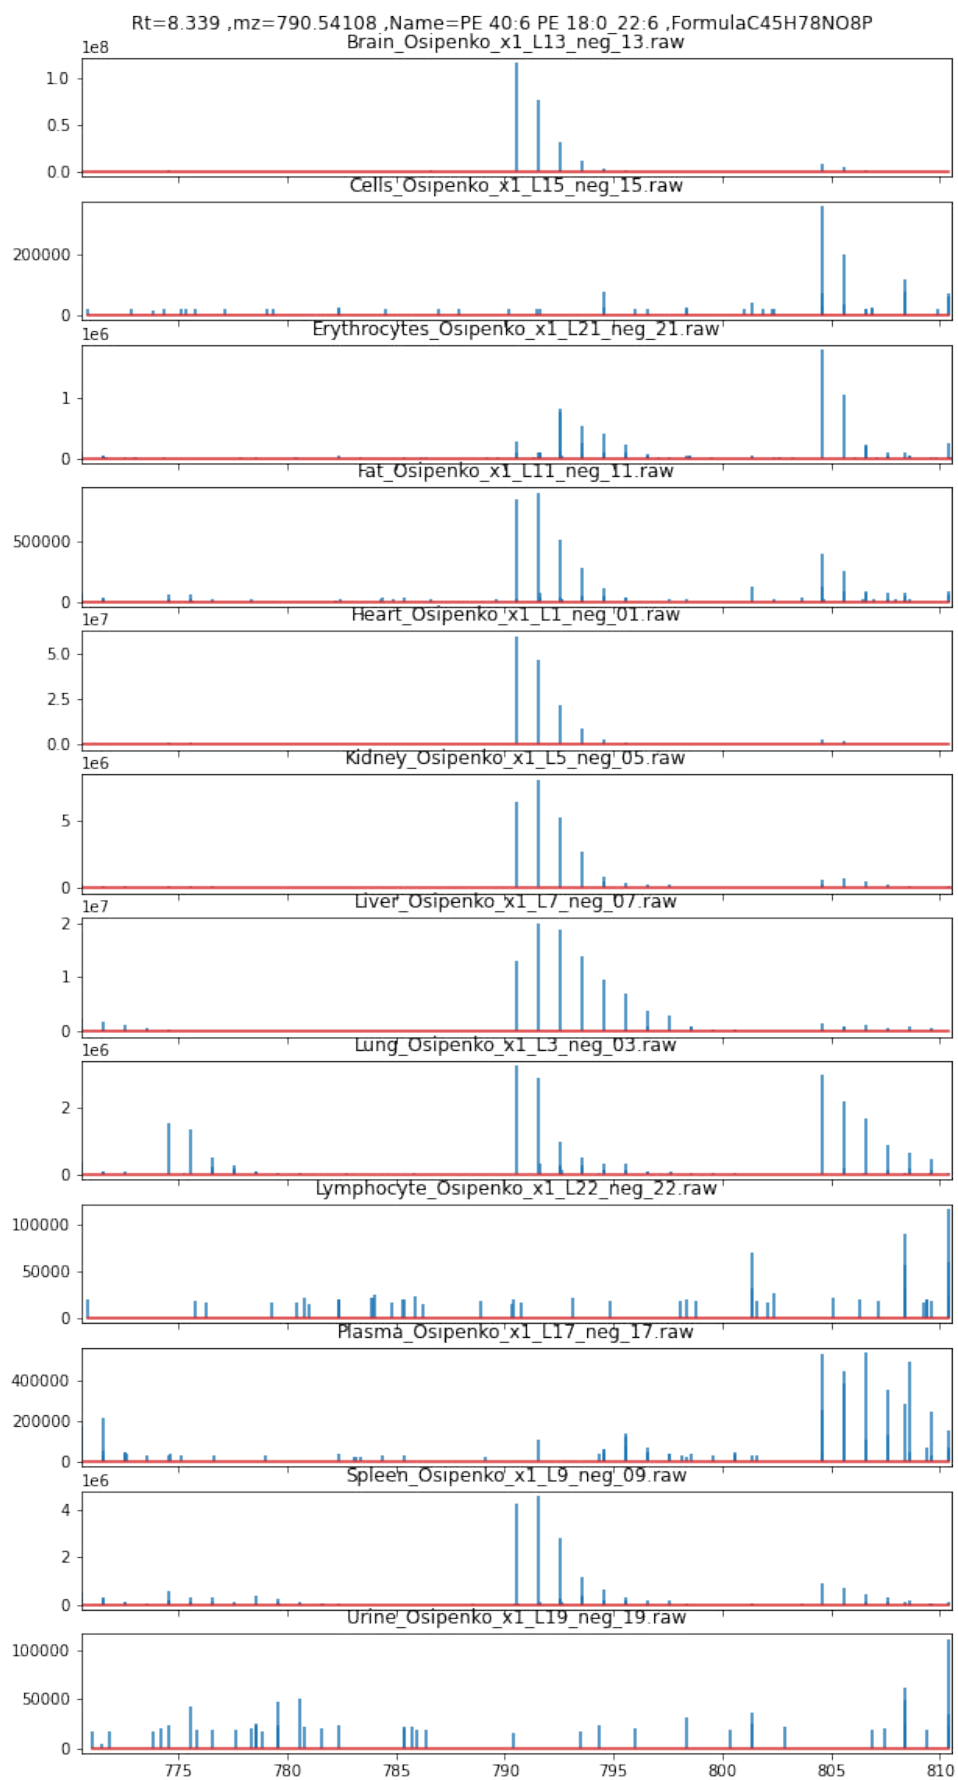

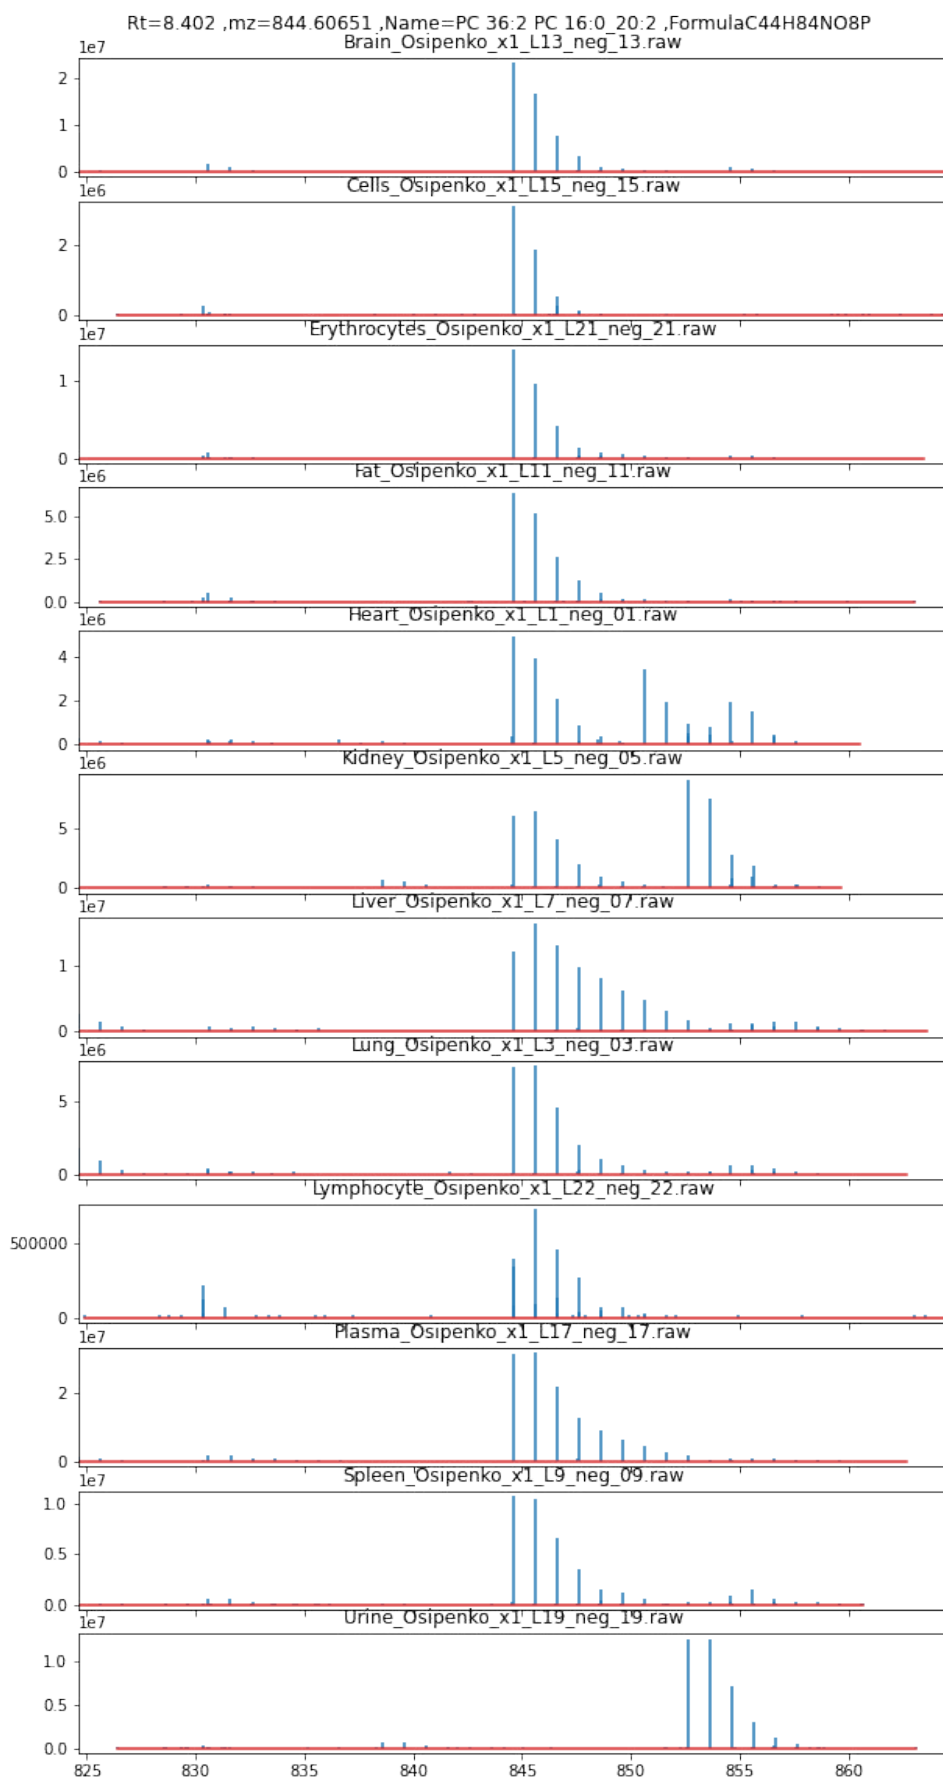

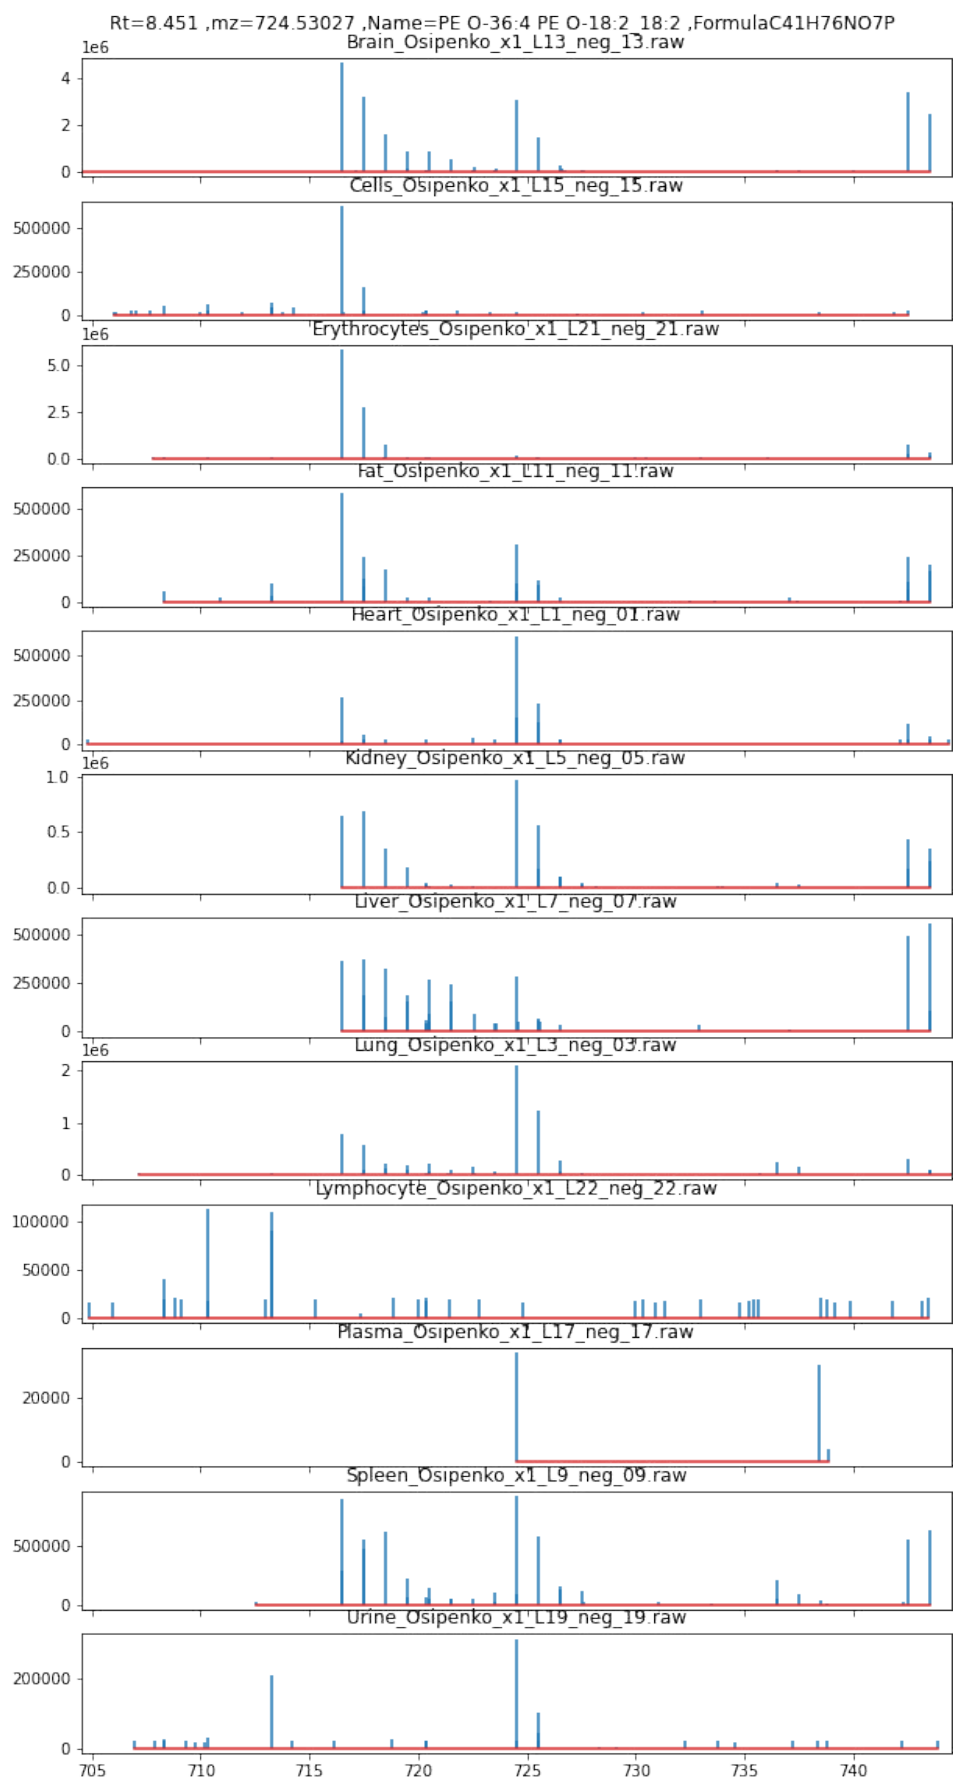

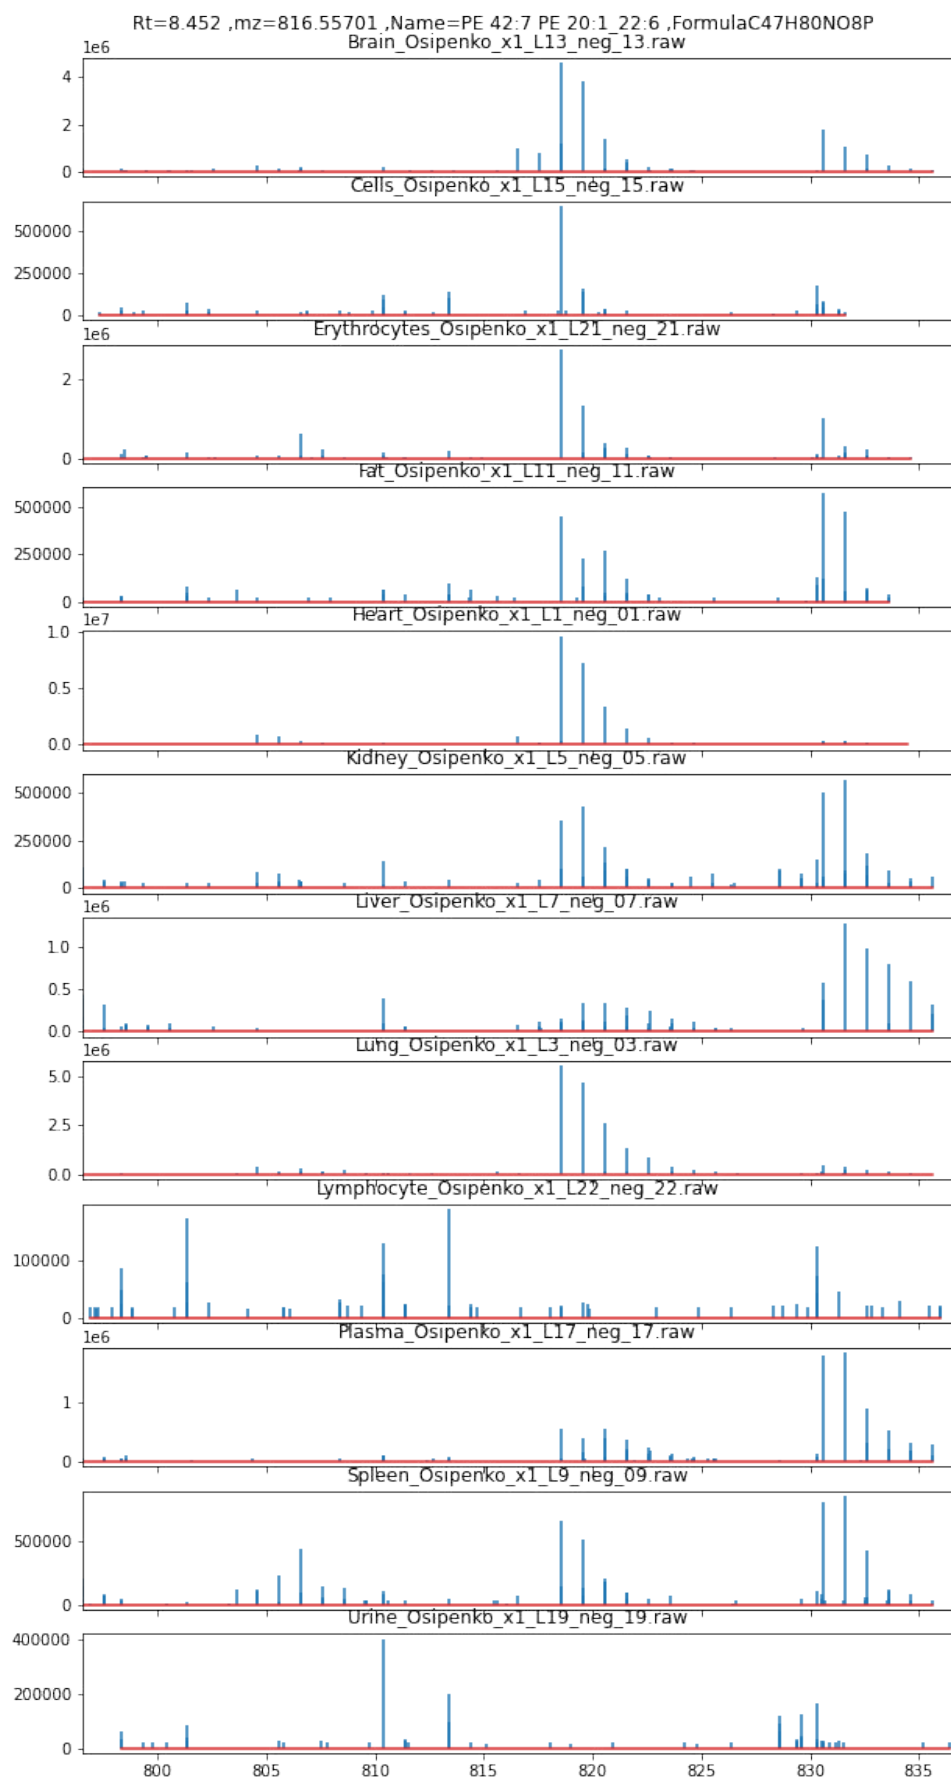



Rt=8.475 ,mz=867.65979 ,Name=SM 42:4 O2 ,FormulaC47H89N2O6P  
Brain\_Osipenko\_x1\_L13\_neg\_13.raw

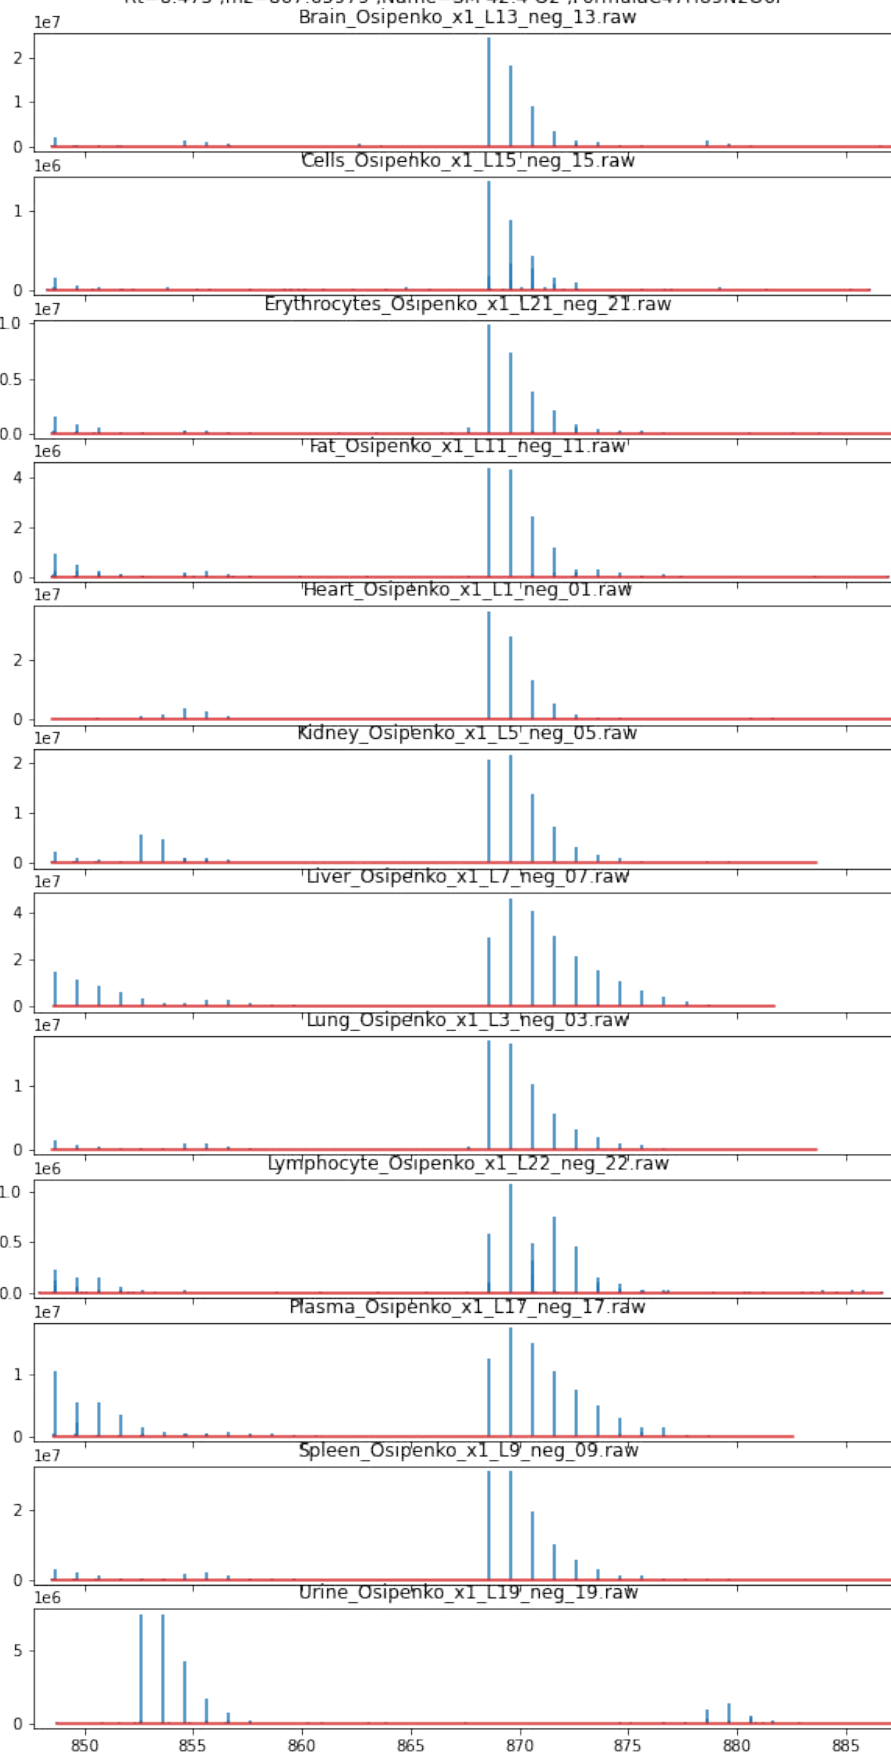

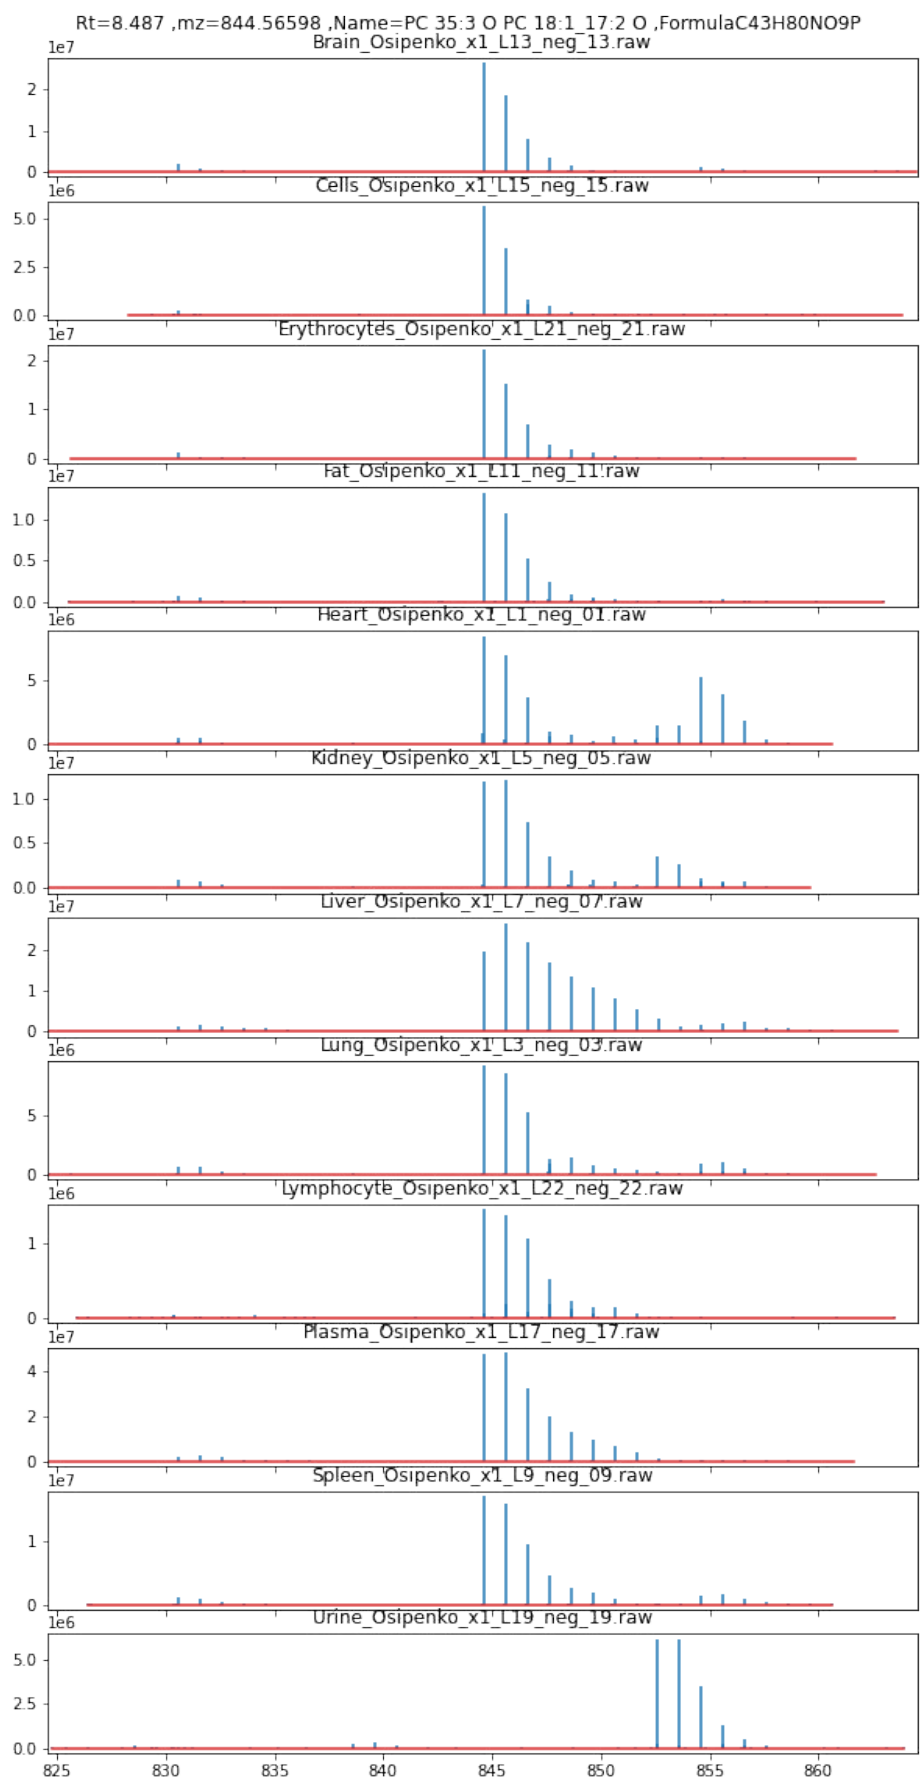

Brain Osipenko x1 L13 neg-13.raw

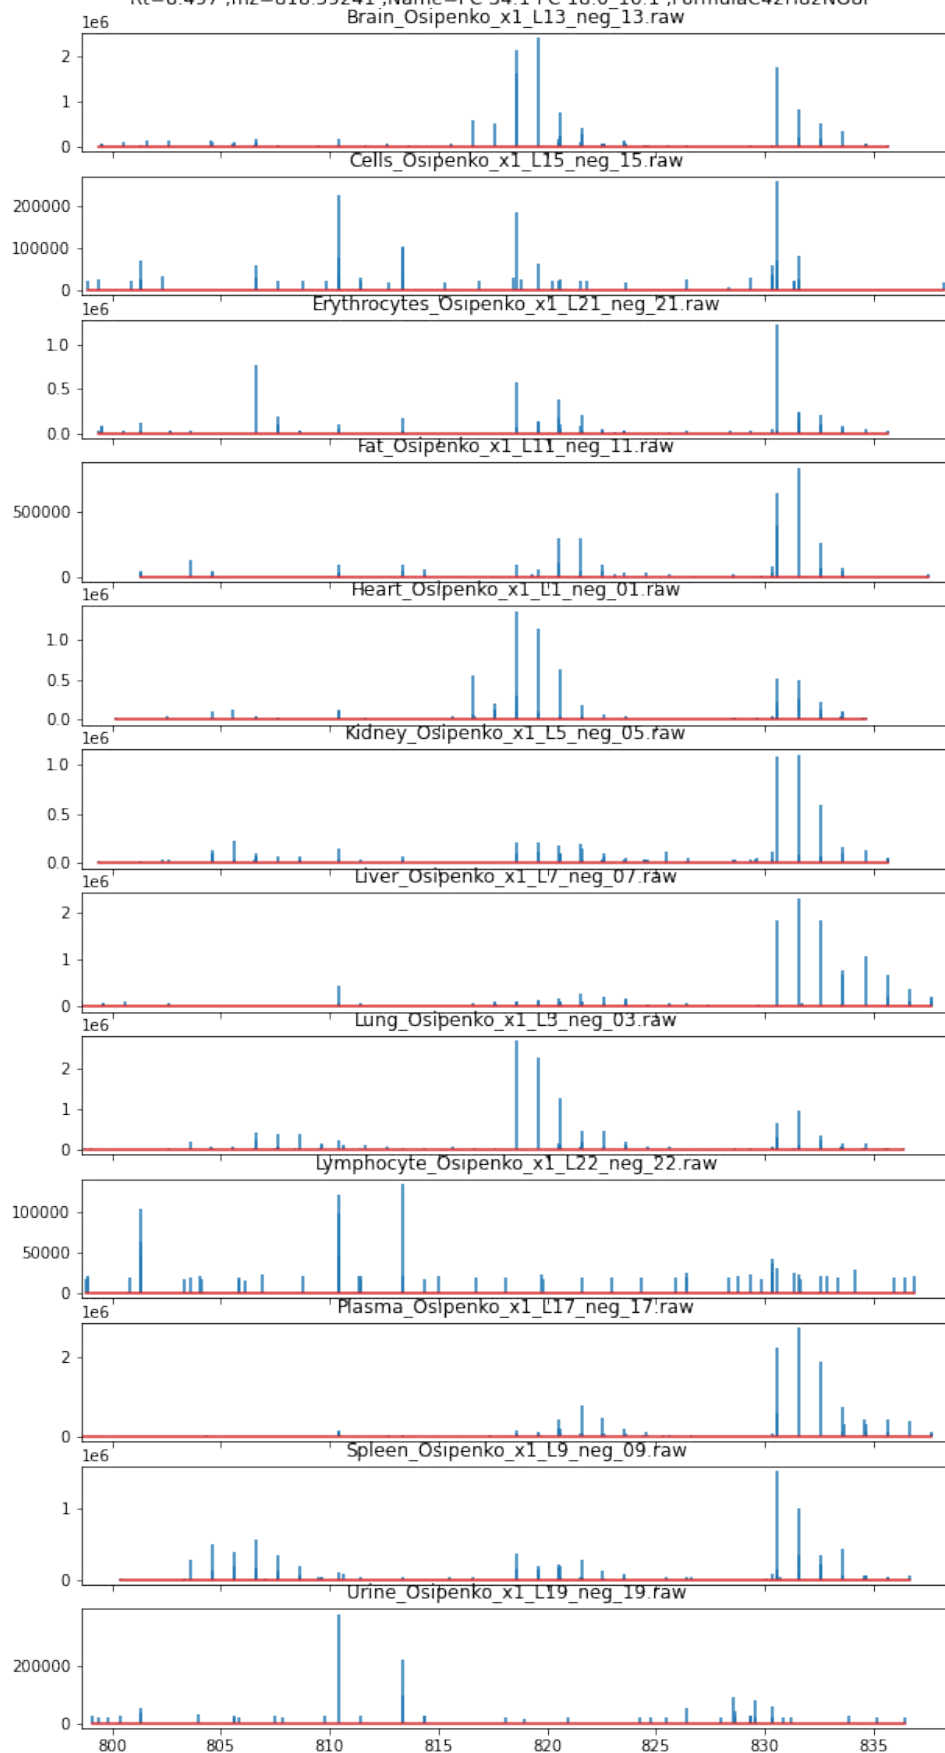

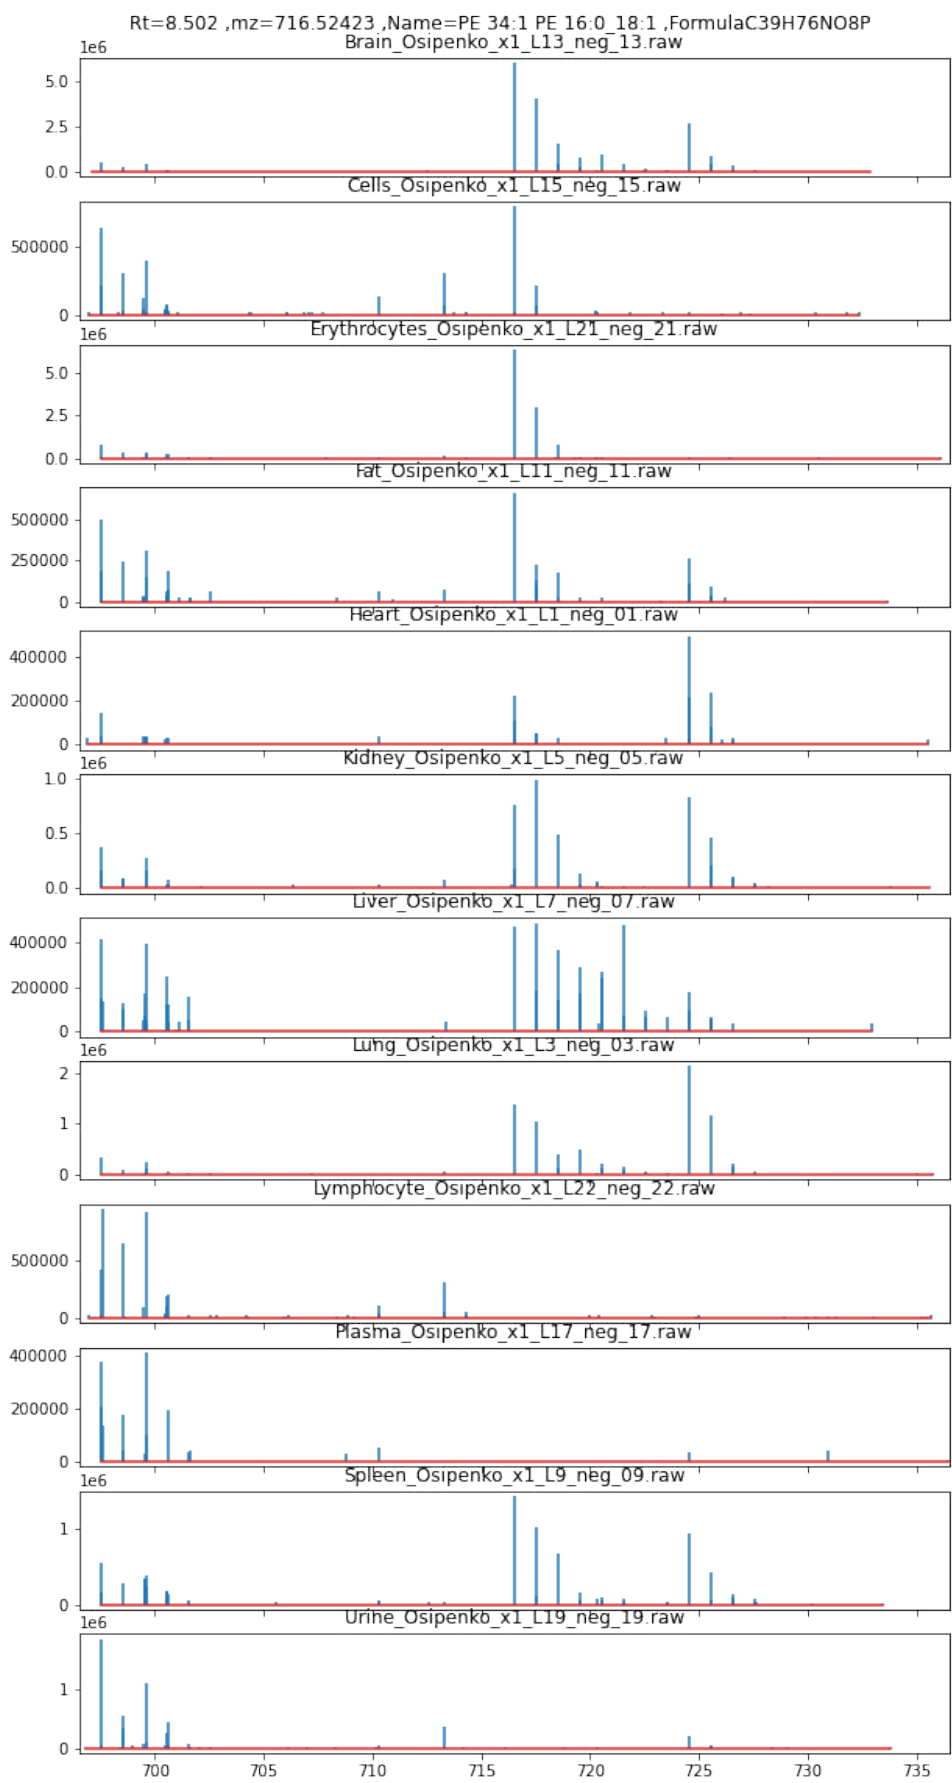

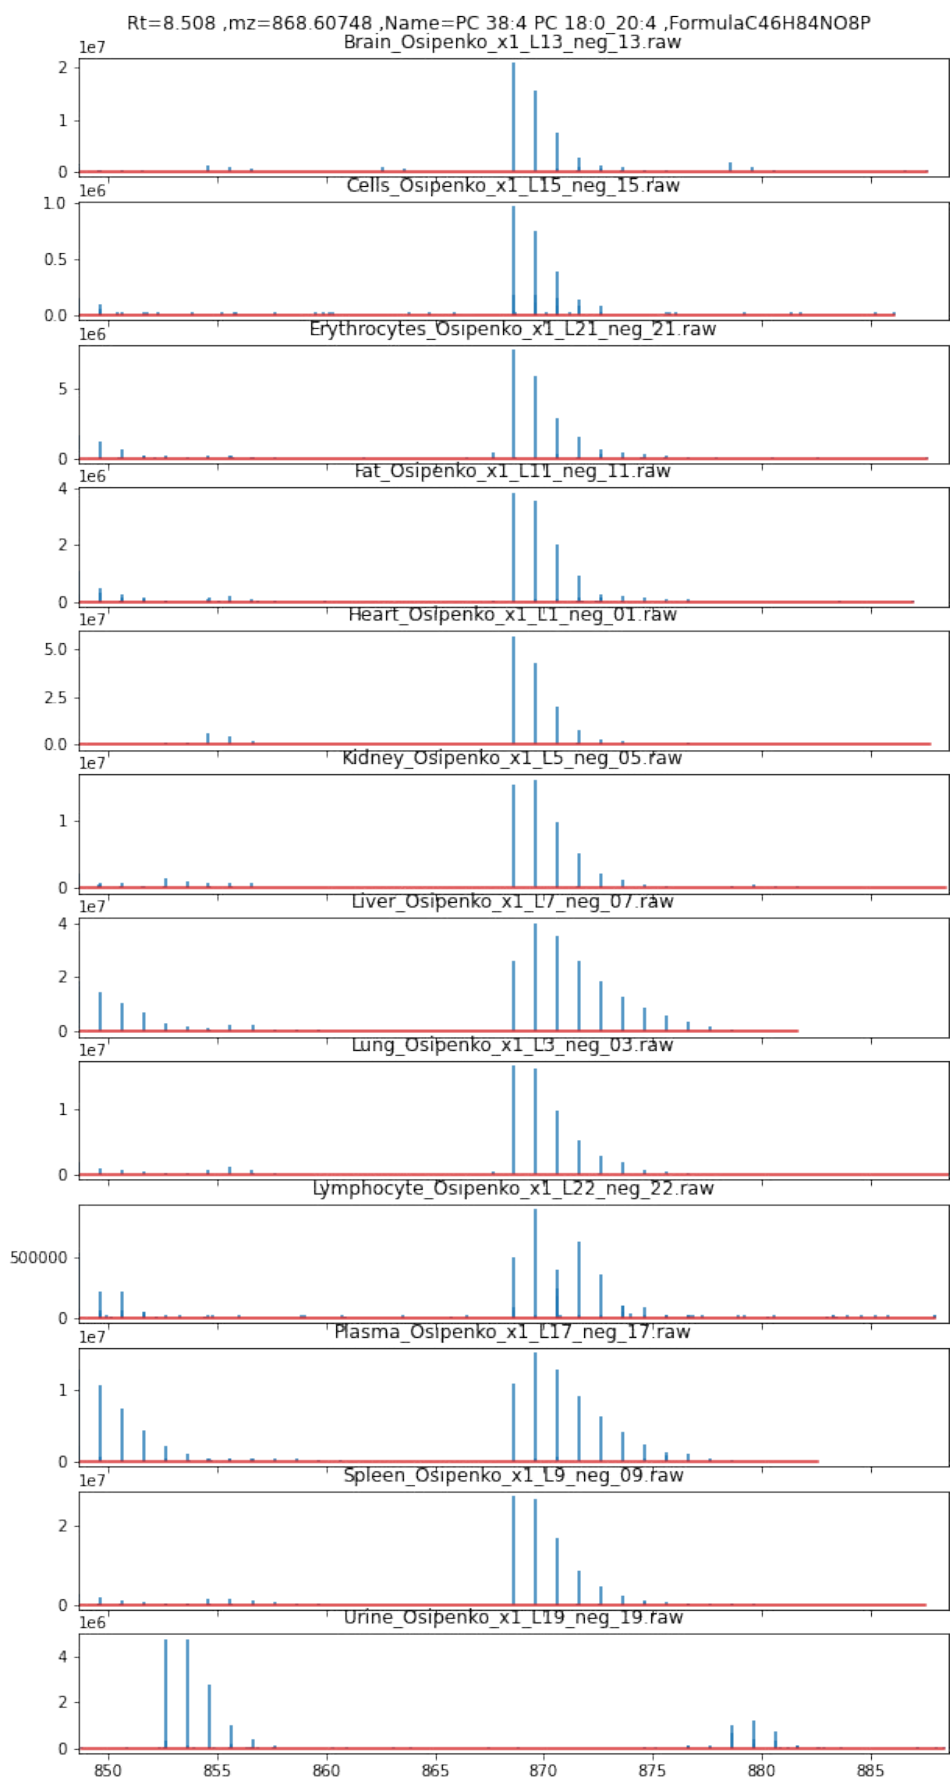

Rt=8.574 ,mz=538.52002 ,Name=Cer 34:0 O2 Cer 18:0 O2 16:0 ,FormulaC34H69NO3  
Brain\_Osipenko\_x1\_L13\_neg\_13.raw

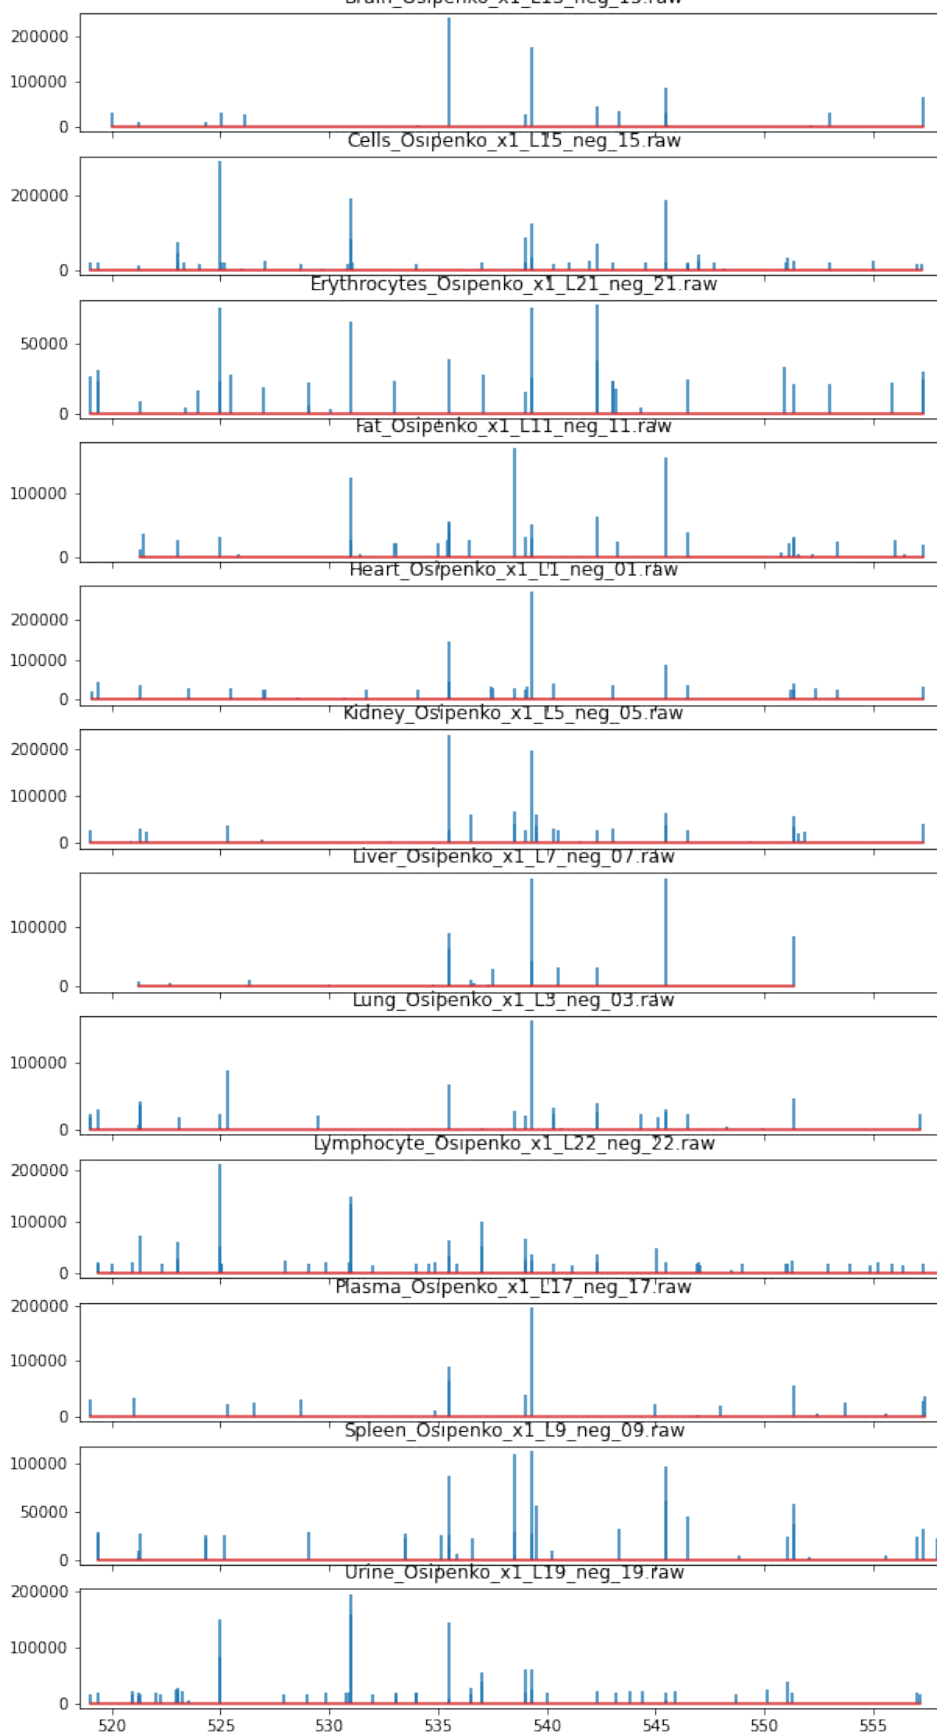

Rt=8.597 ,mz=844.57153 ,Name=PC 35:3 O PC 18:2 17:1 O ,FormulaC43H80NO9P  
Brain\_Osipenko\_x1\_L13\_neg\_13.raw

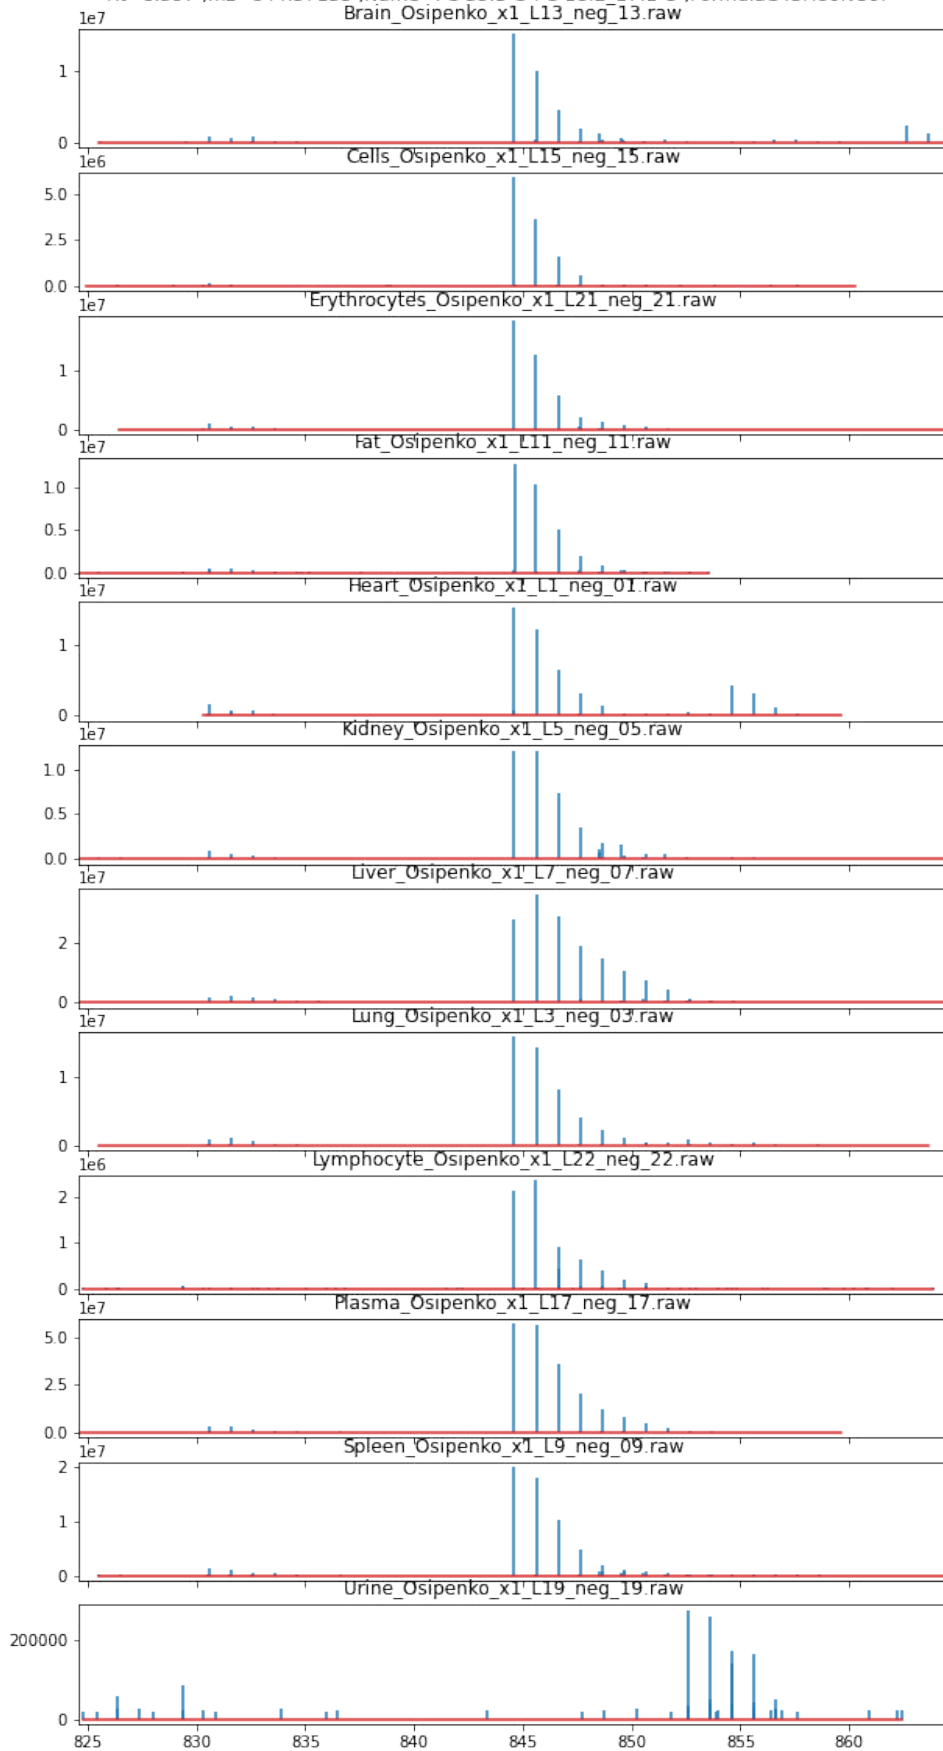

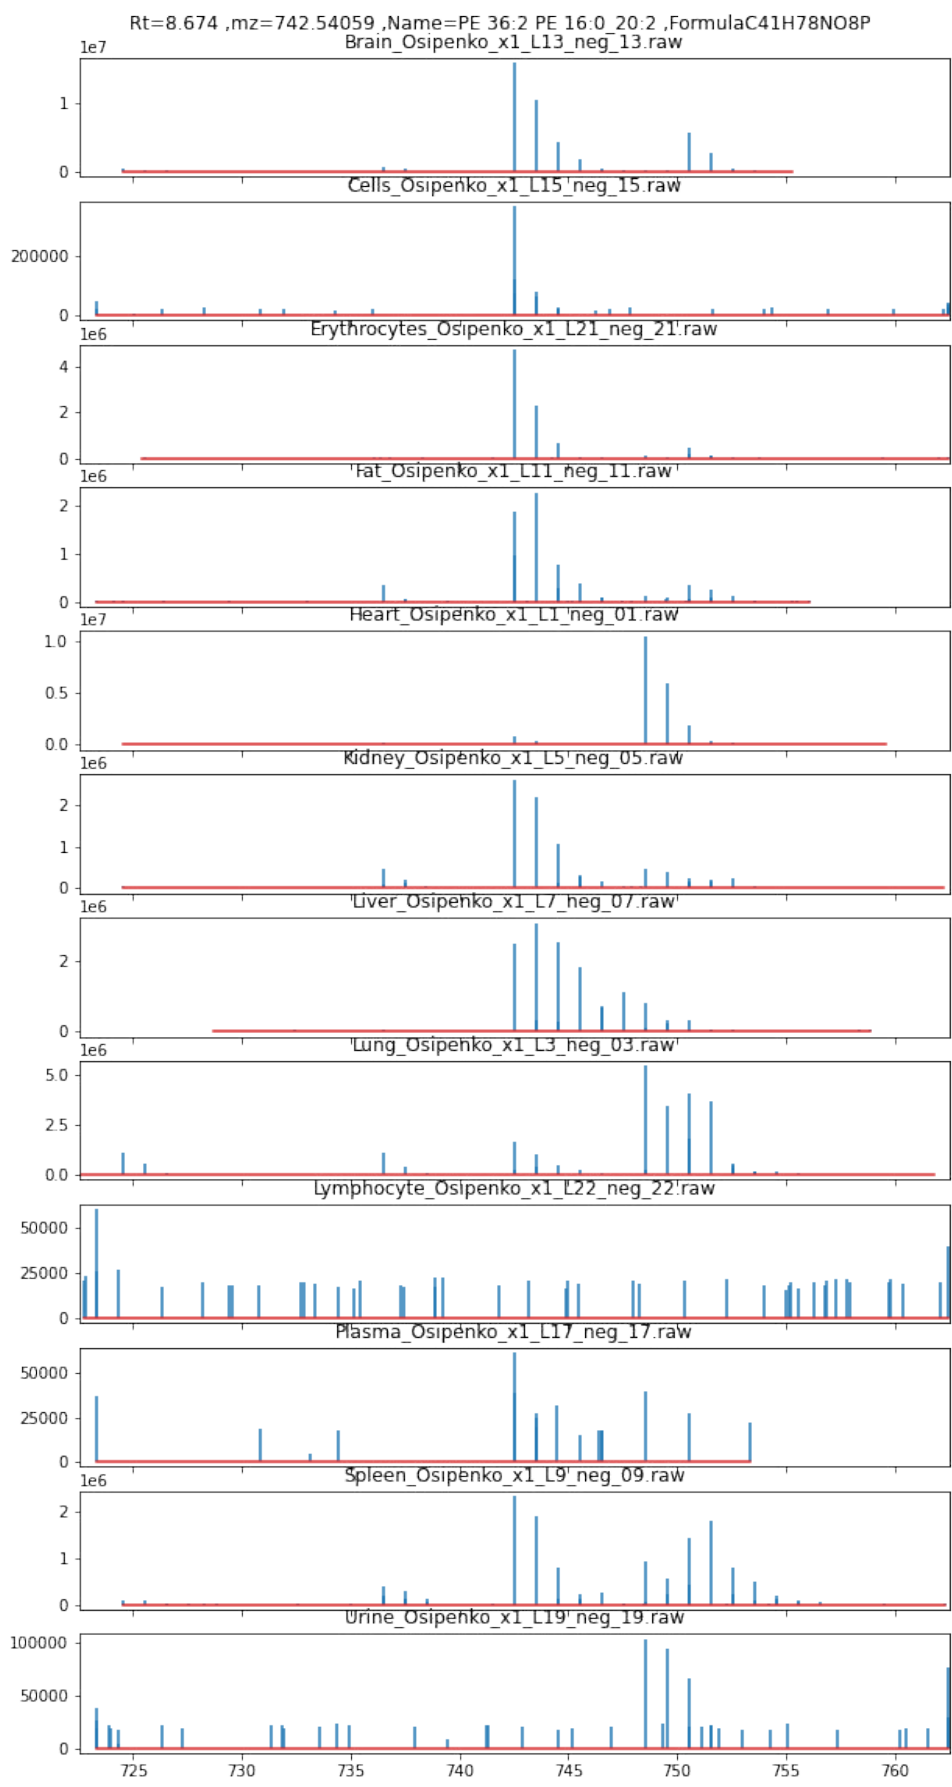



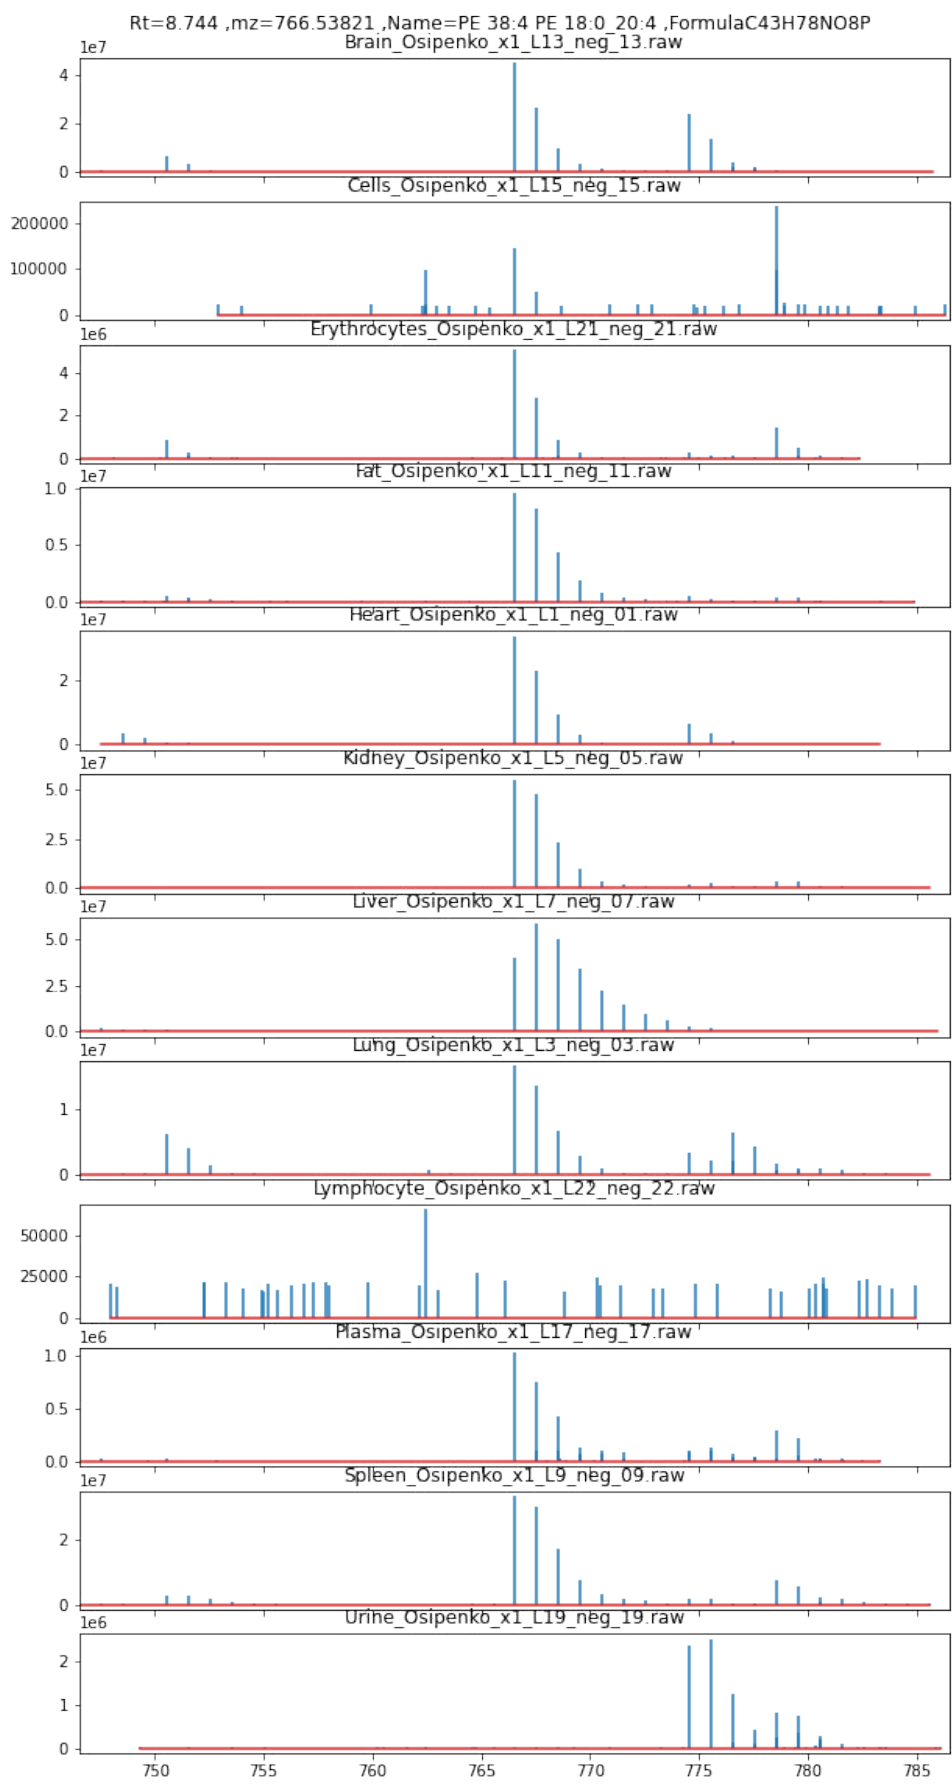

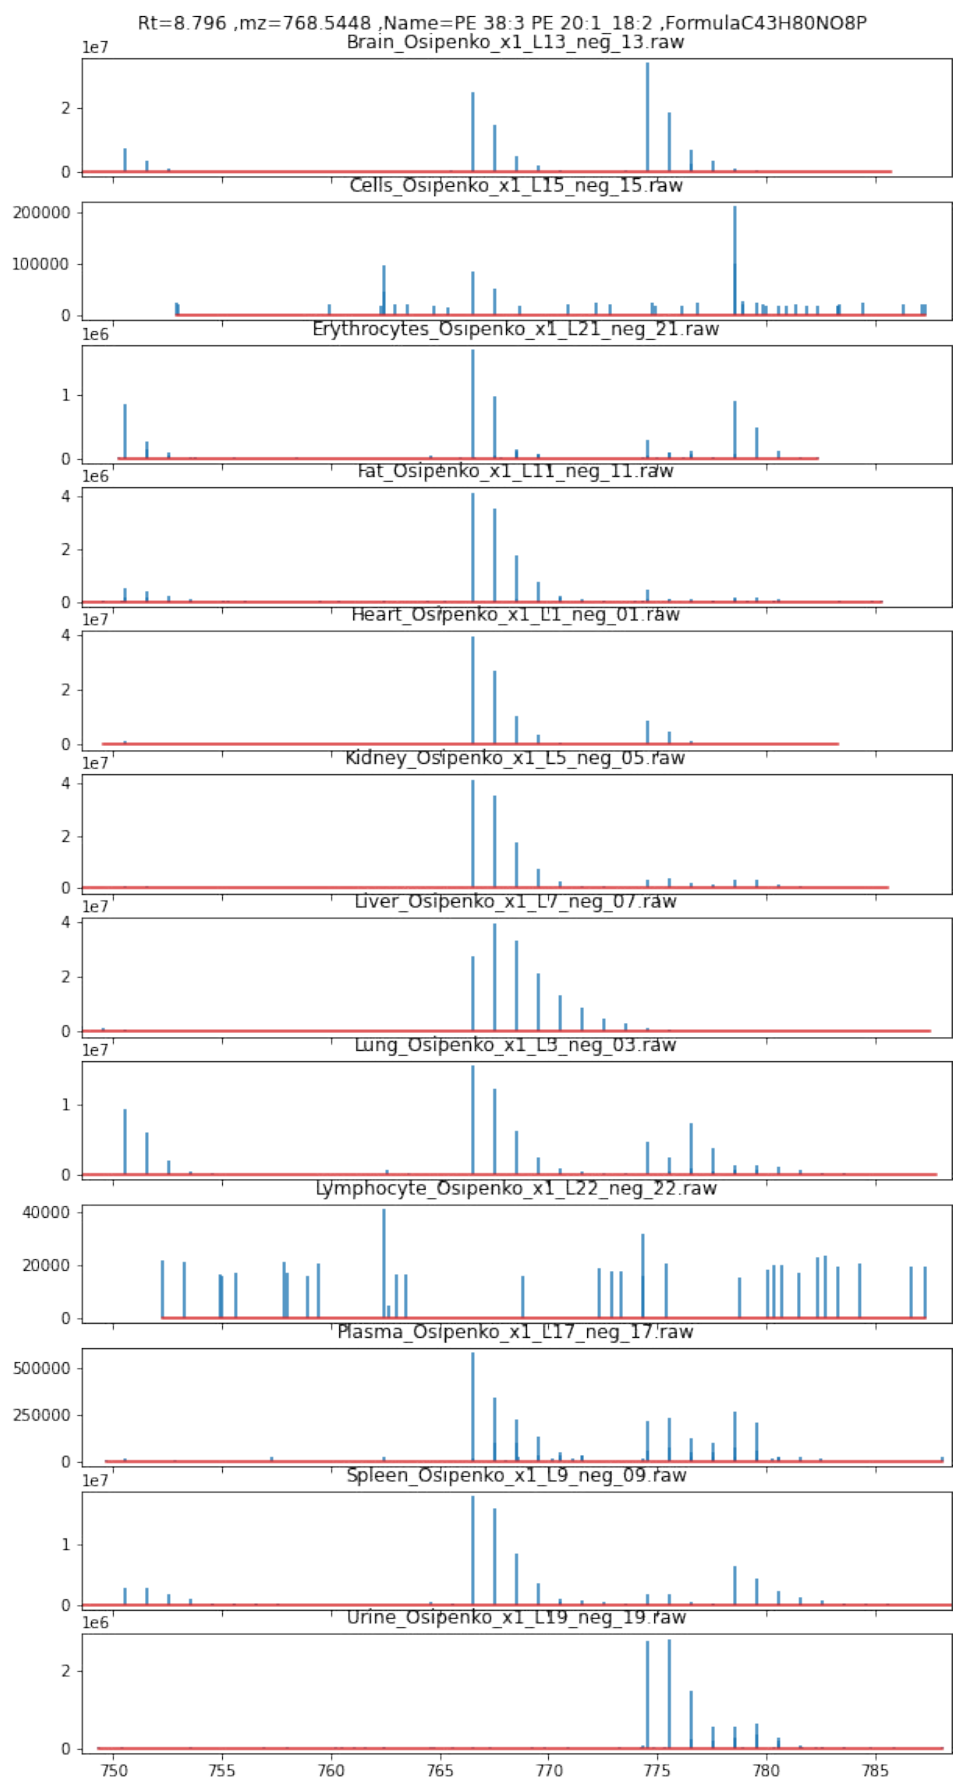

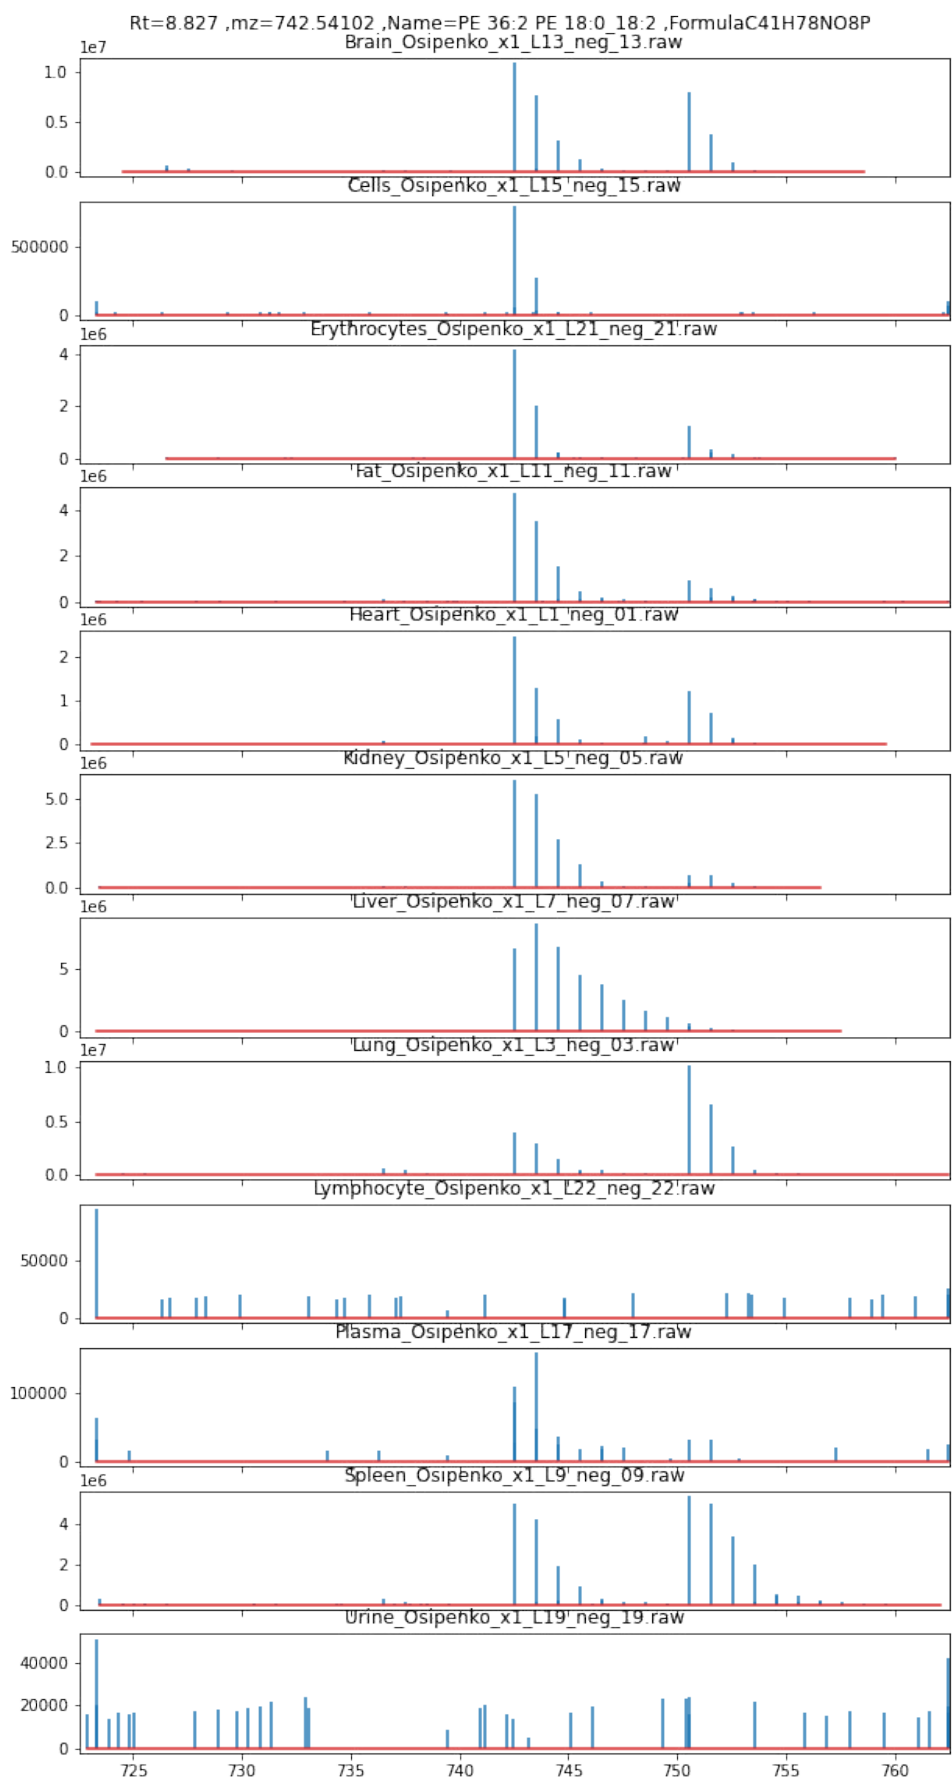

Rt=8.862 ,mz=792.55255 ,Name=PE 40:5 PE 20:1 20:4 ,FormulaC45H80NO8P  
Brain\_Osipenko\_x1\_L13\_neg\_13.raw

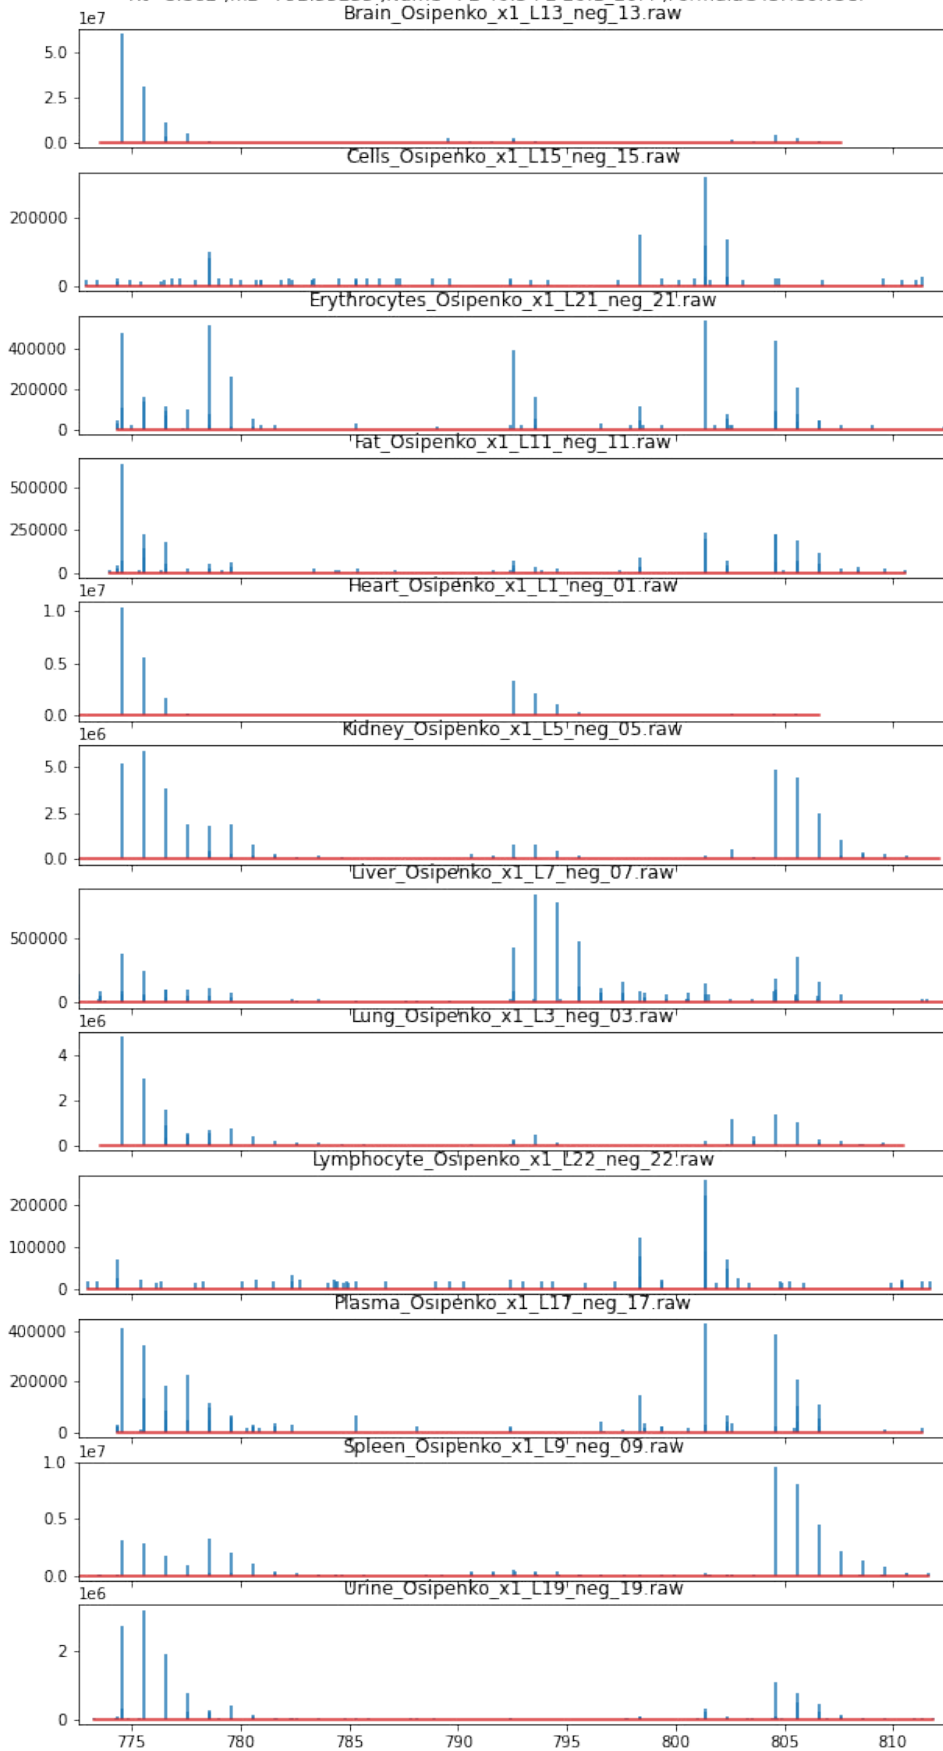

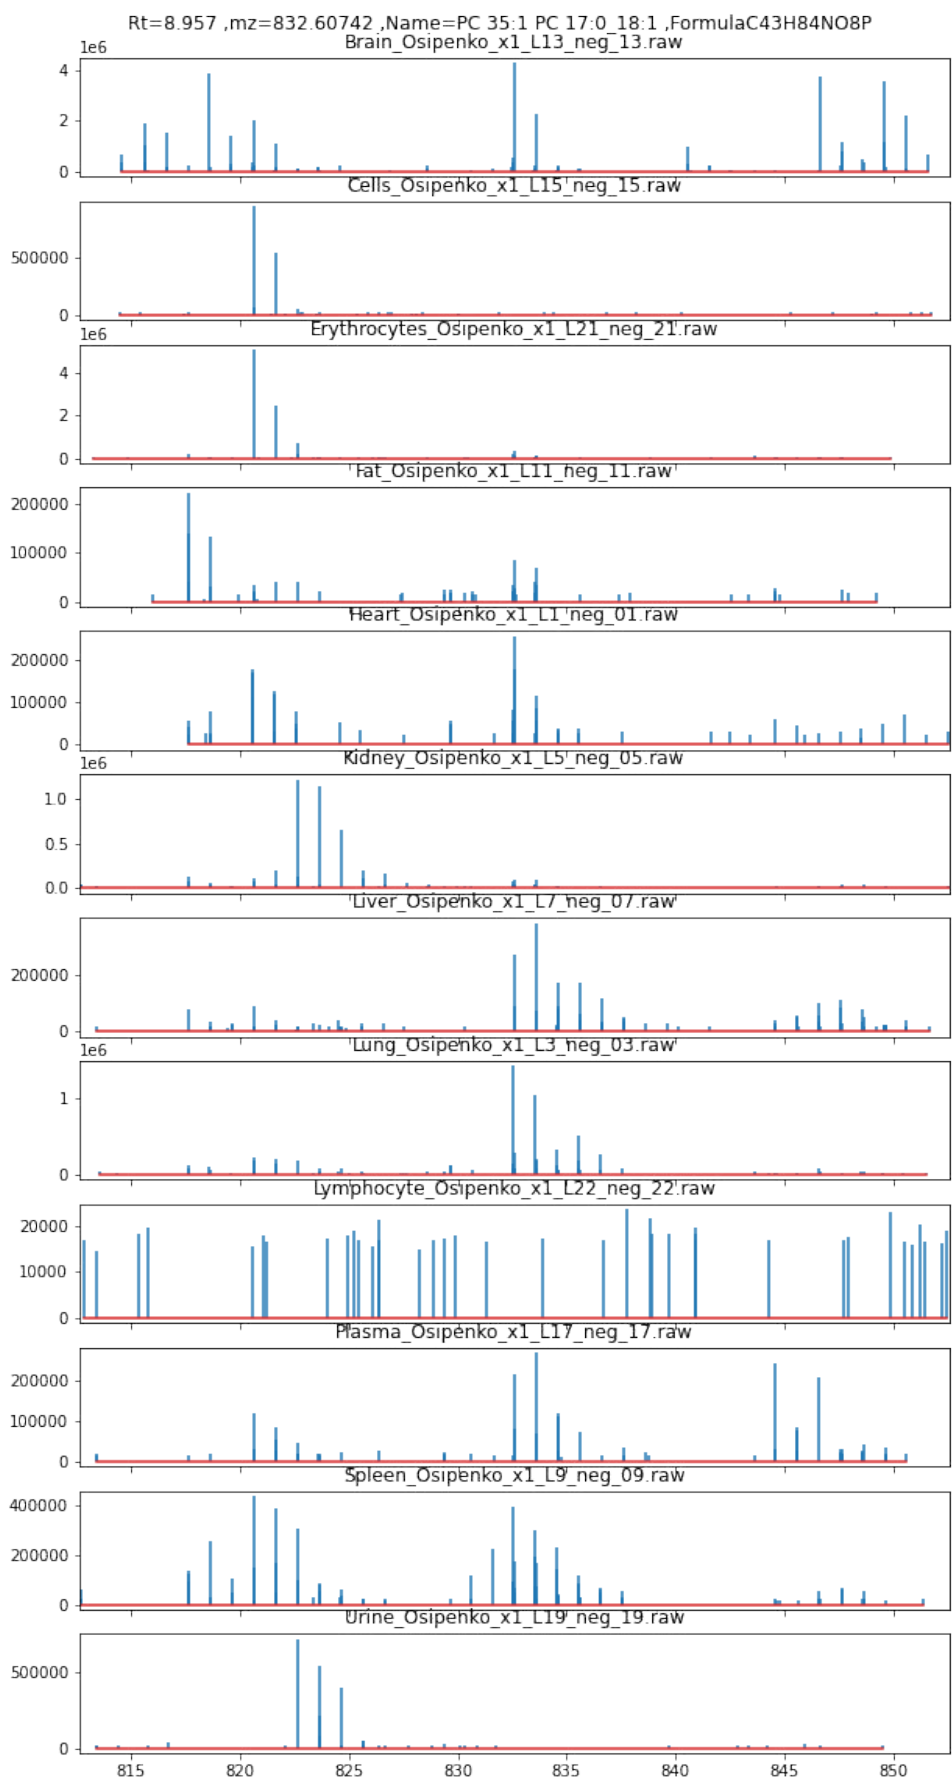

Rt=8.979 ,mz=774.54547 ,Name=PE O-40:7 PE O-18:1 22:6 ,FormulaC45H78NO7P  
Brain\_Osipenko\_x1\_L13\_neg\_13.raw

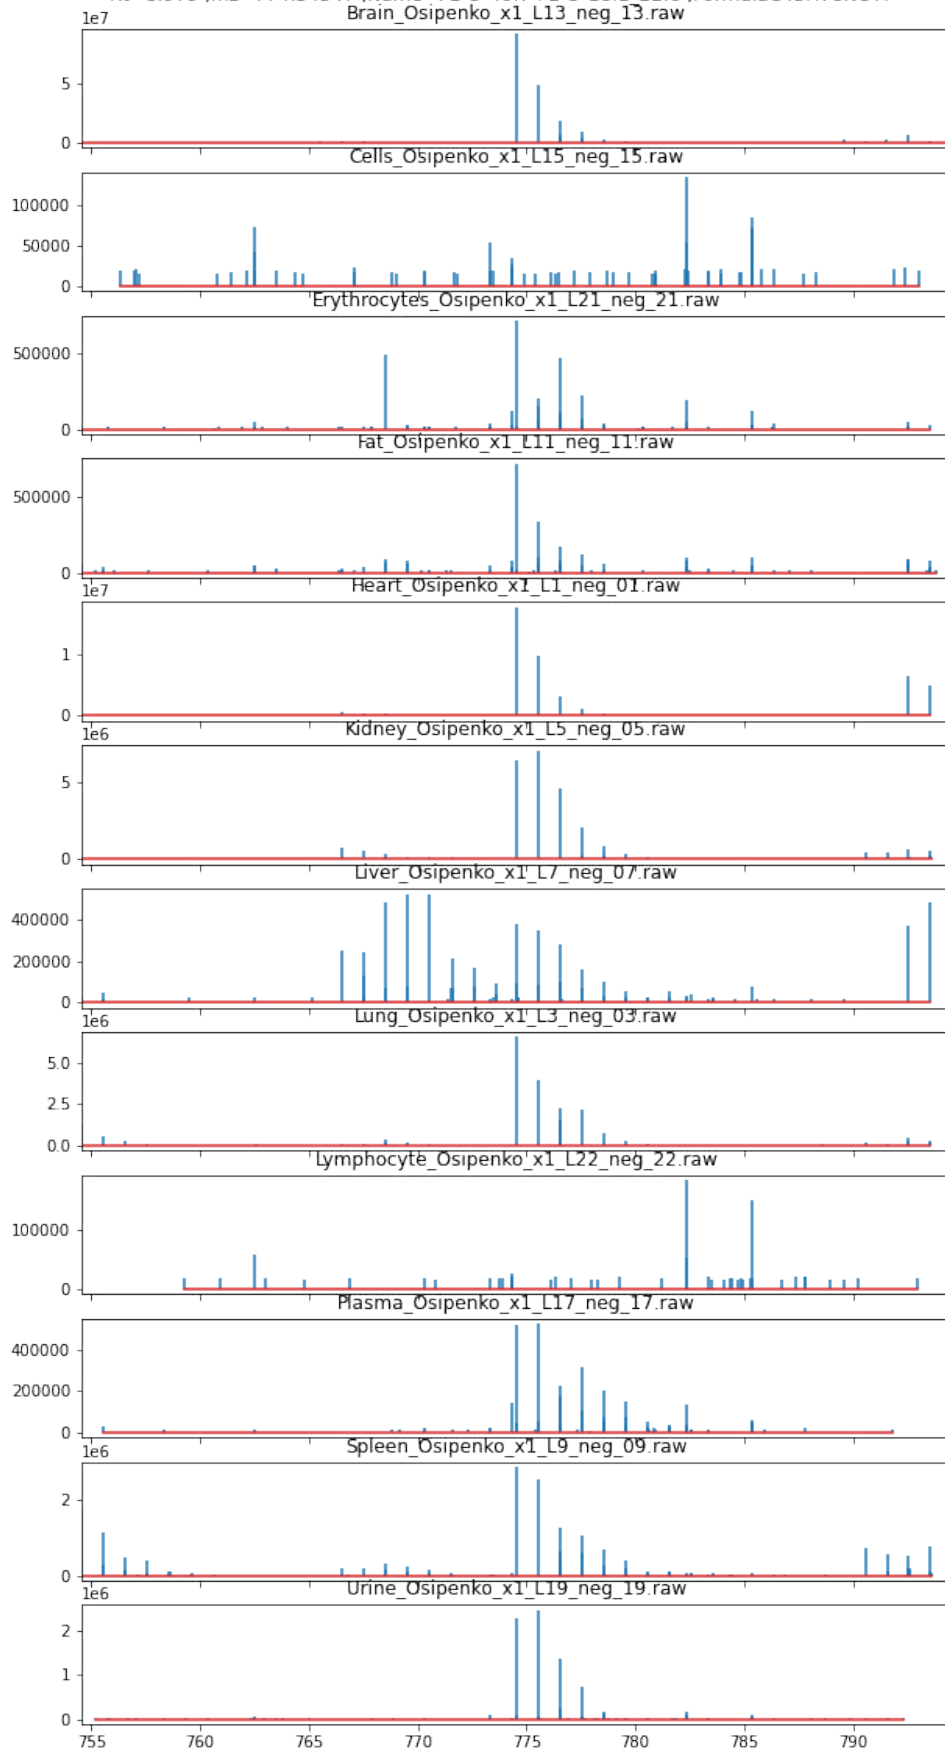

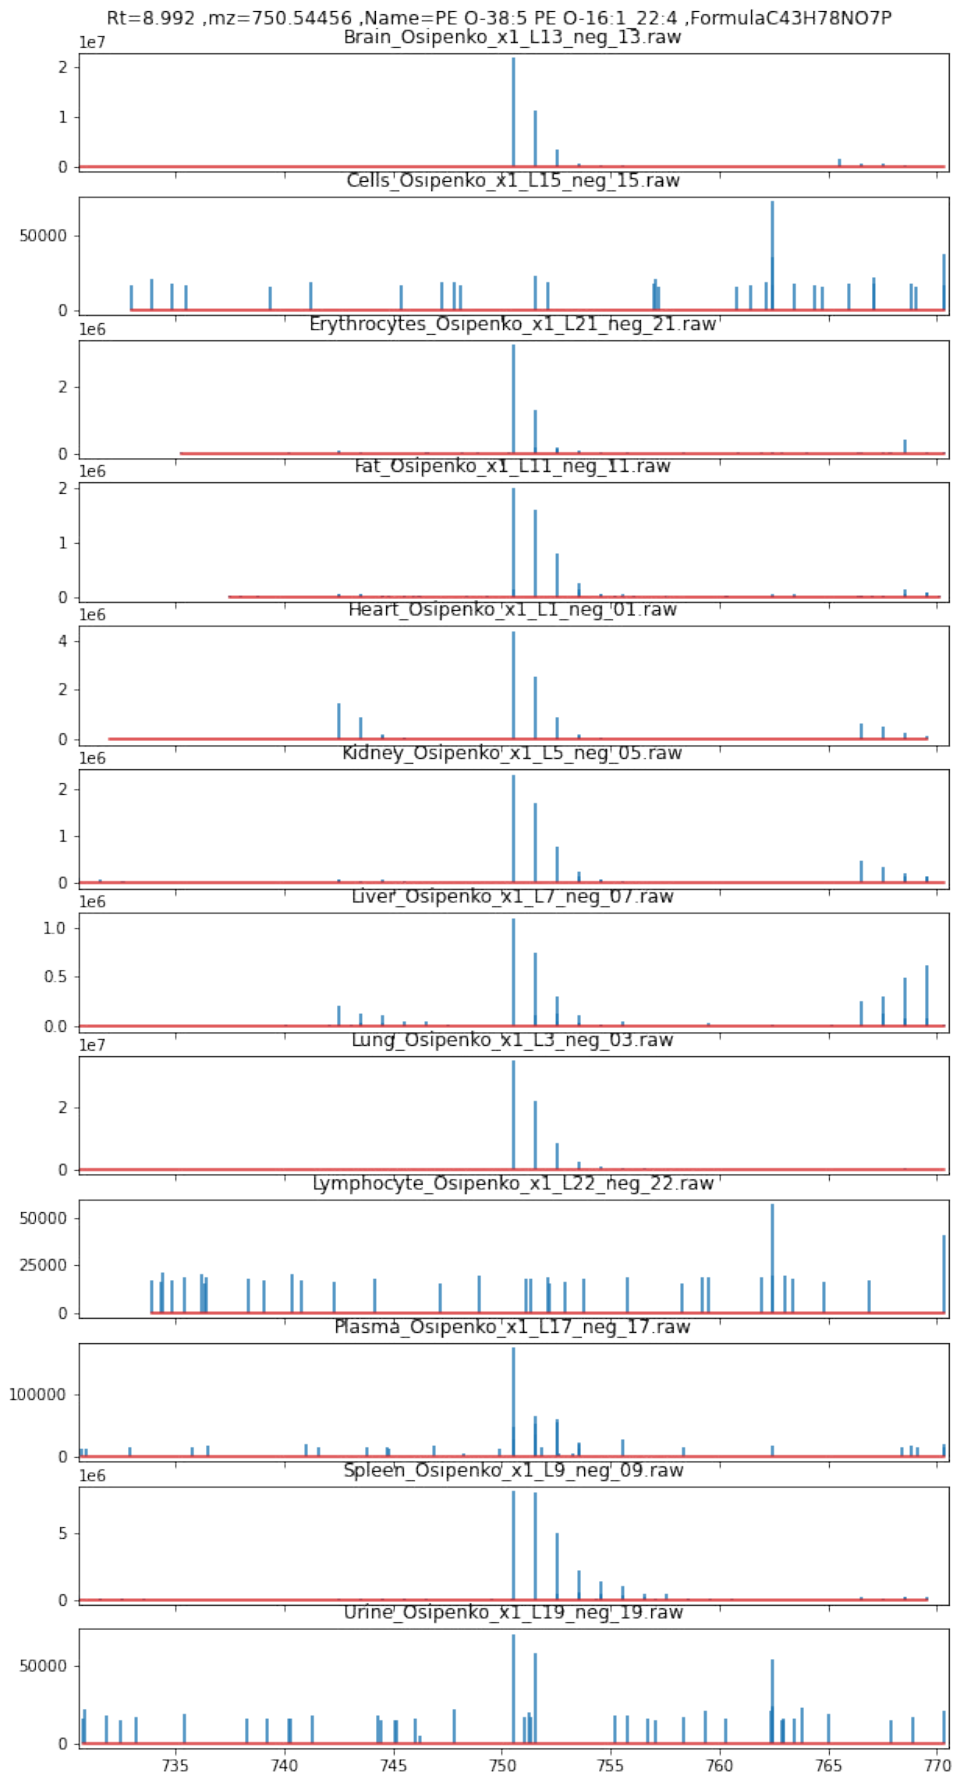

Rt=8.992 ,mz=804.61334 ,Name=PC O-34:1 PC O-16:0 18:1 ,FormulaC42H84NO7P  
Brain\_Osipenko\_x1\_L13\_neg\_13.raw

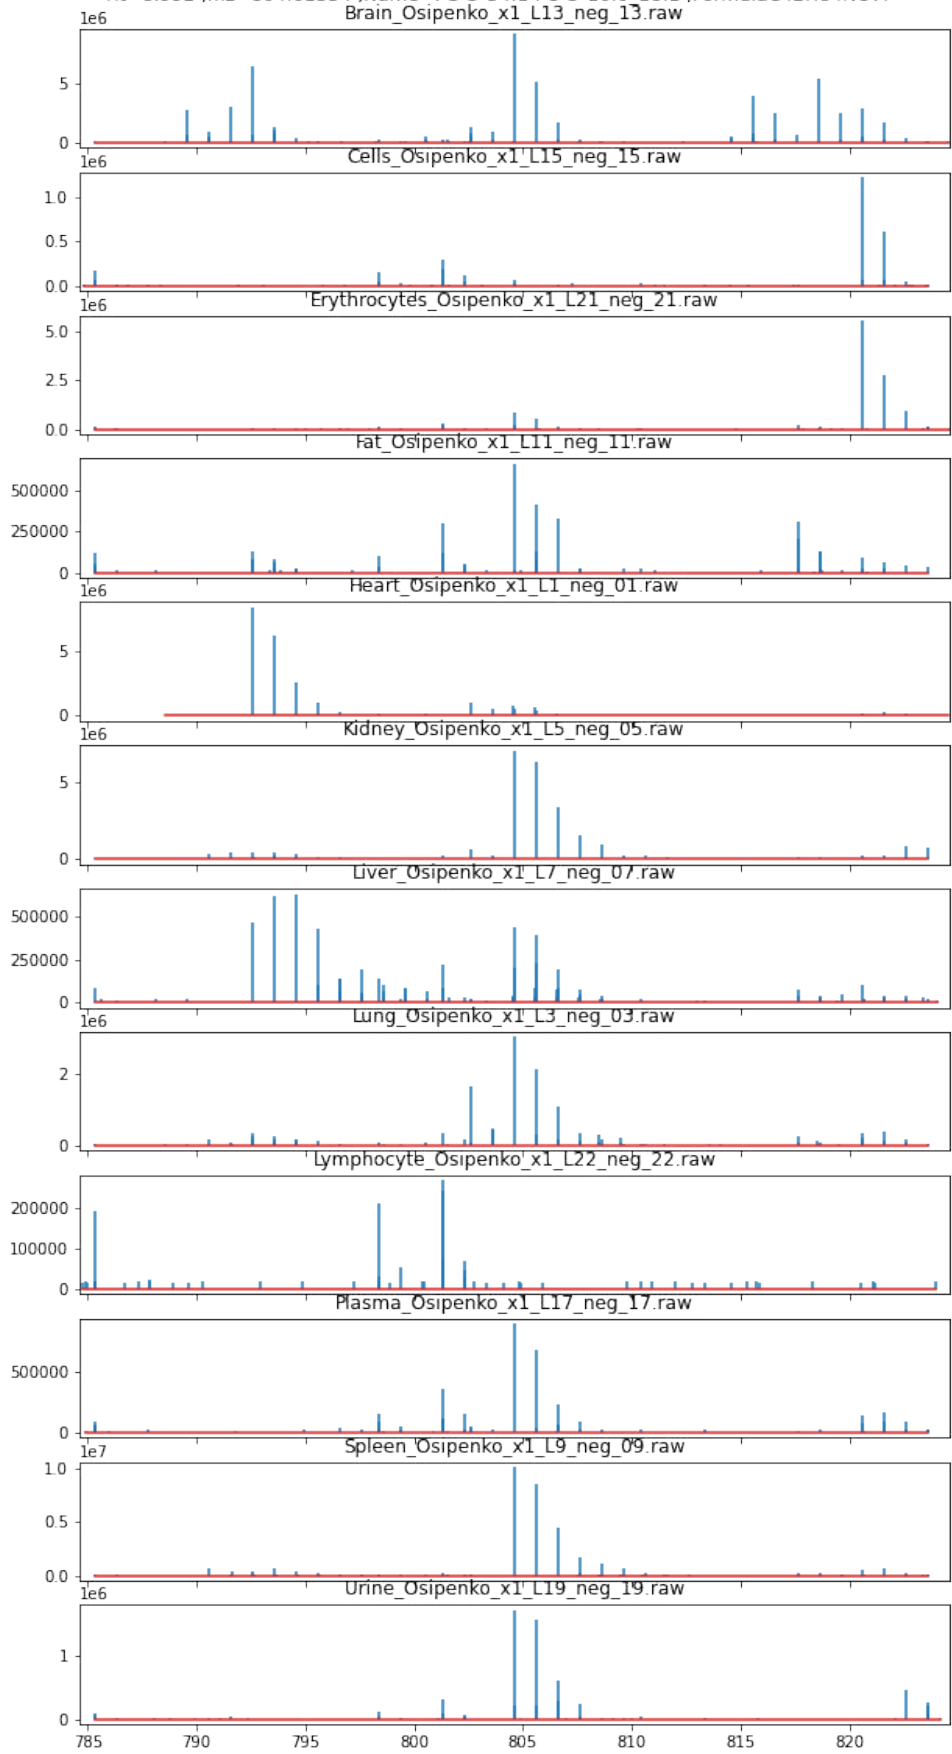



Rt=9.55 ,mz=726.54535 ,Name=PE O-36:3 PE O-18:2 18:1 ,FormulaC41H78NO7P  
Brain\_Osipenko\_x1\_L13\_neg\_13.raw

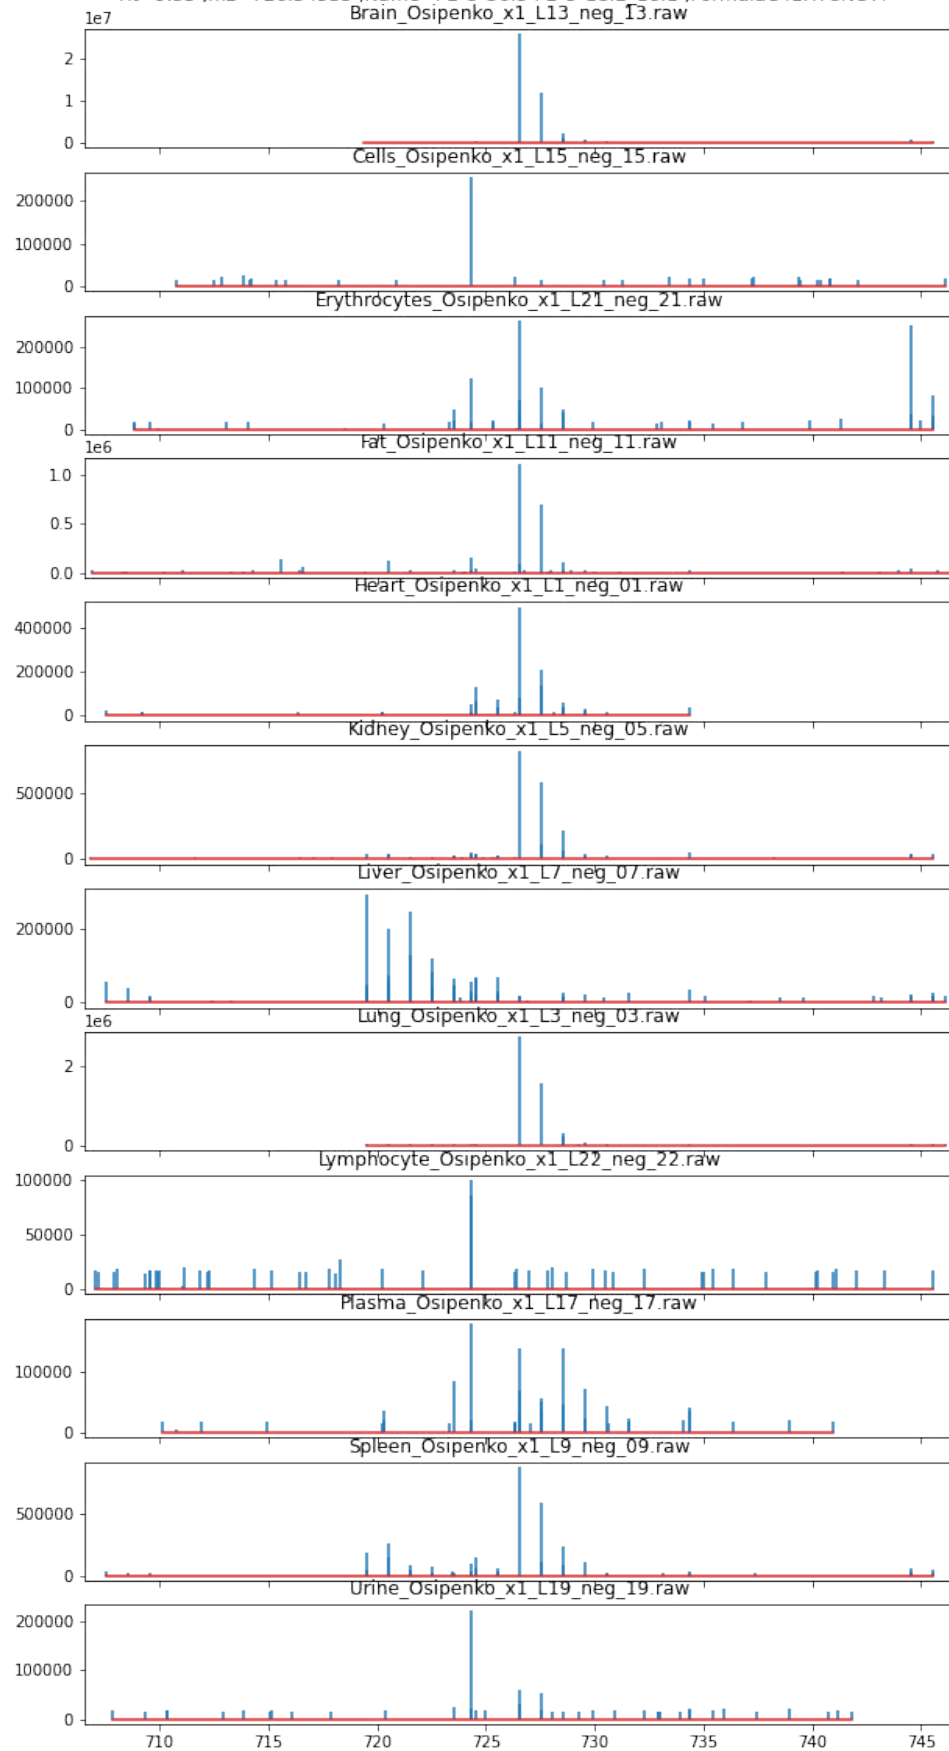

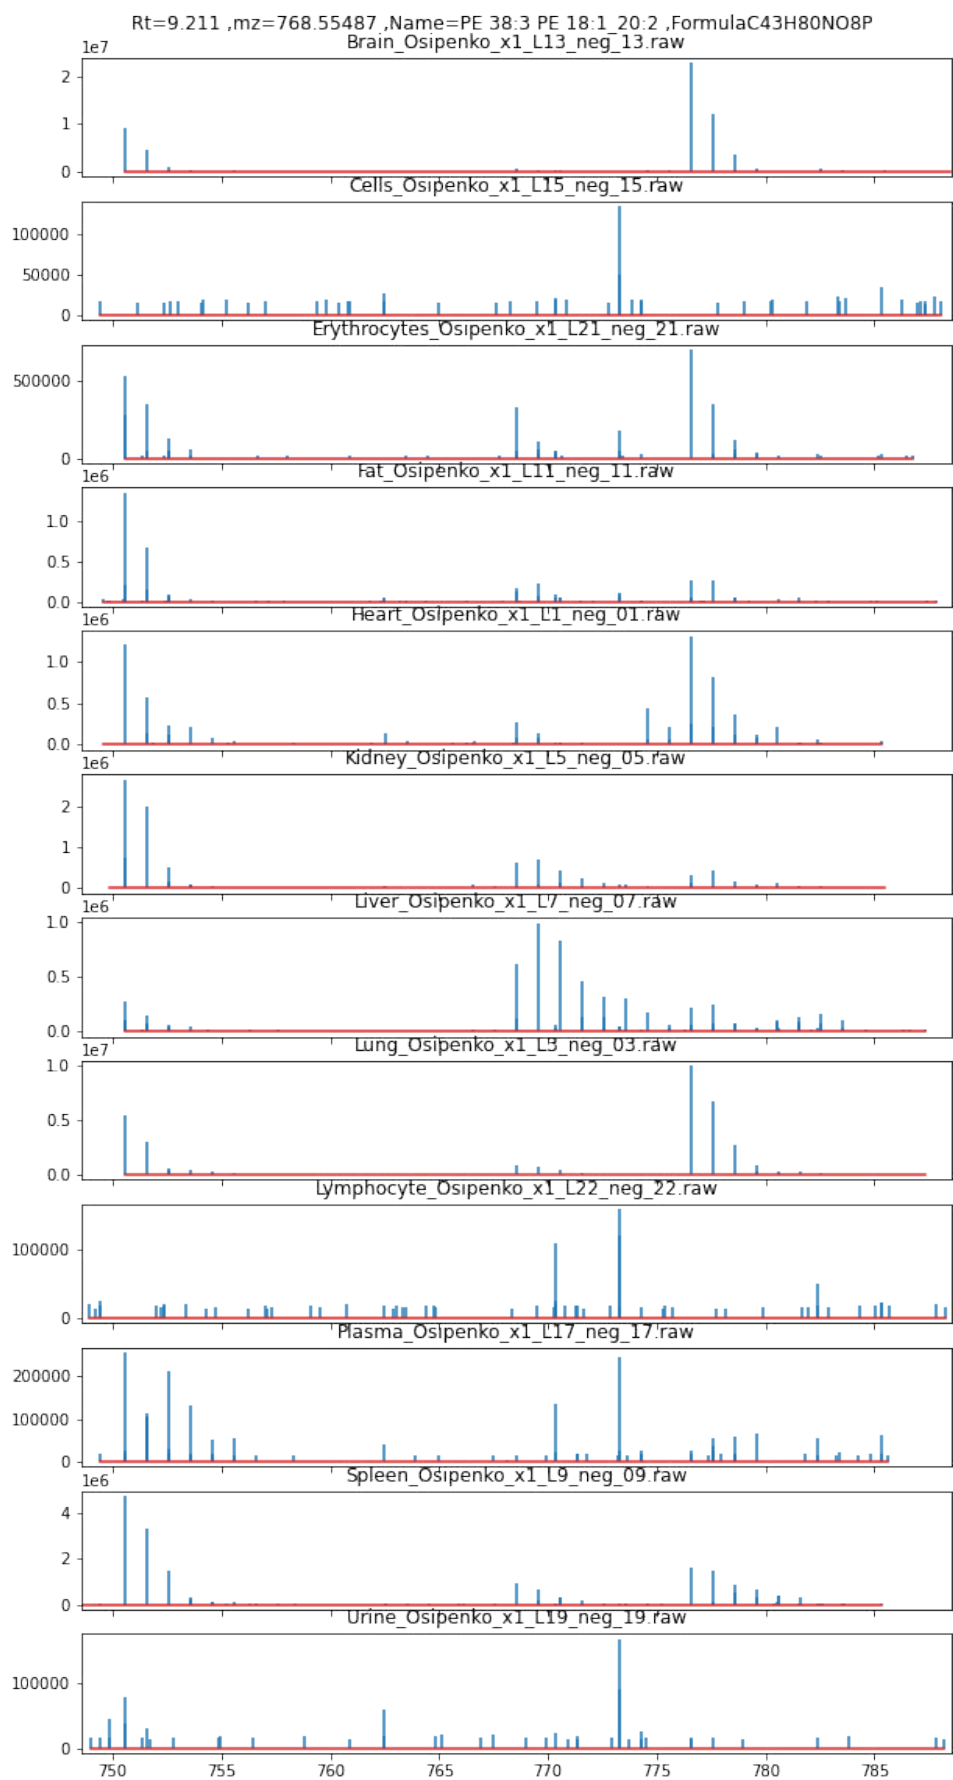

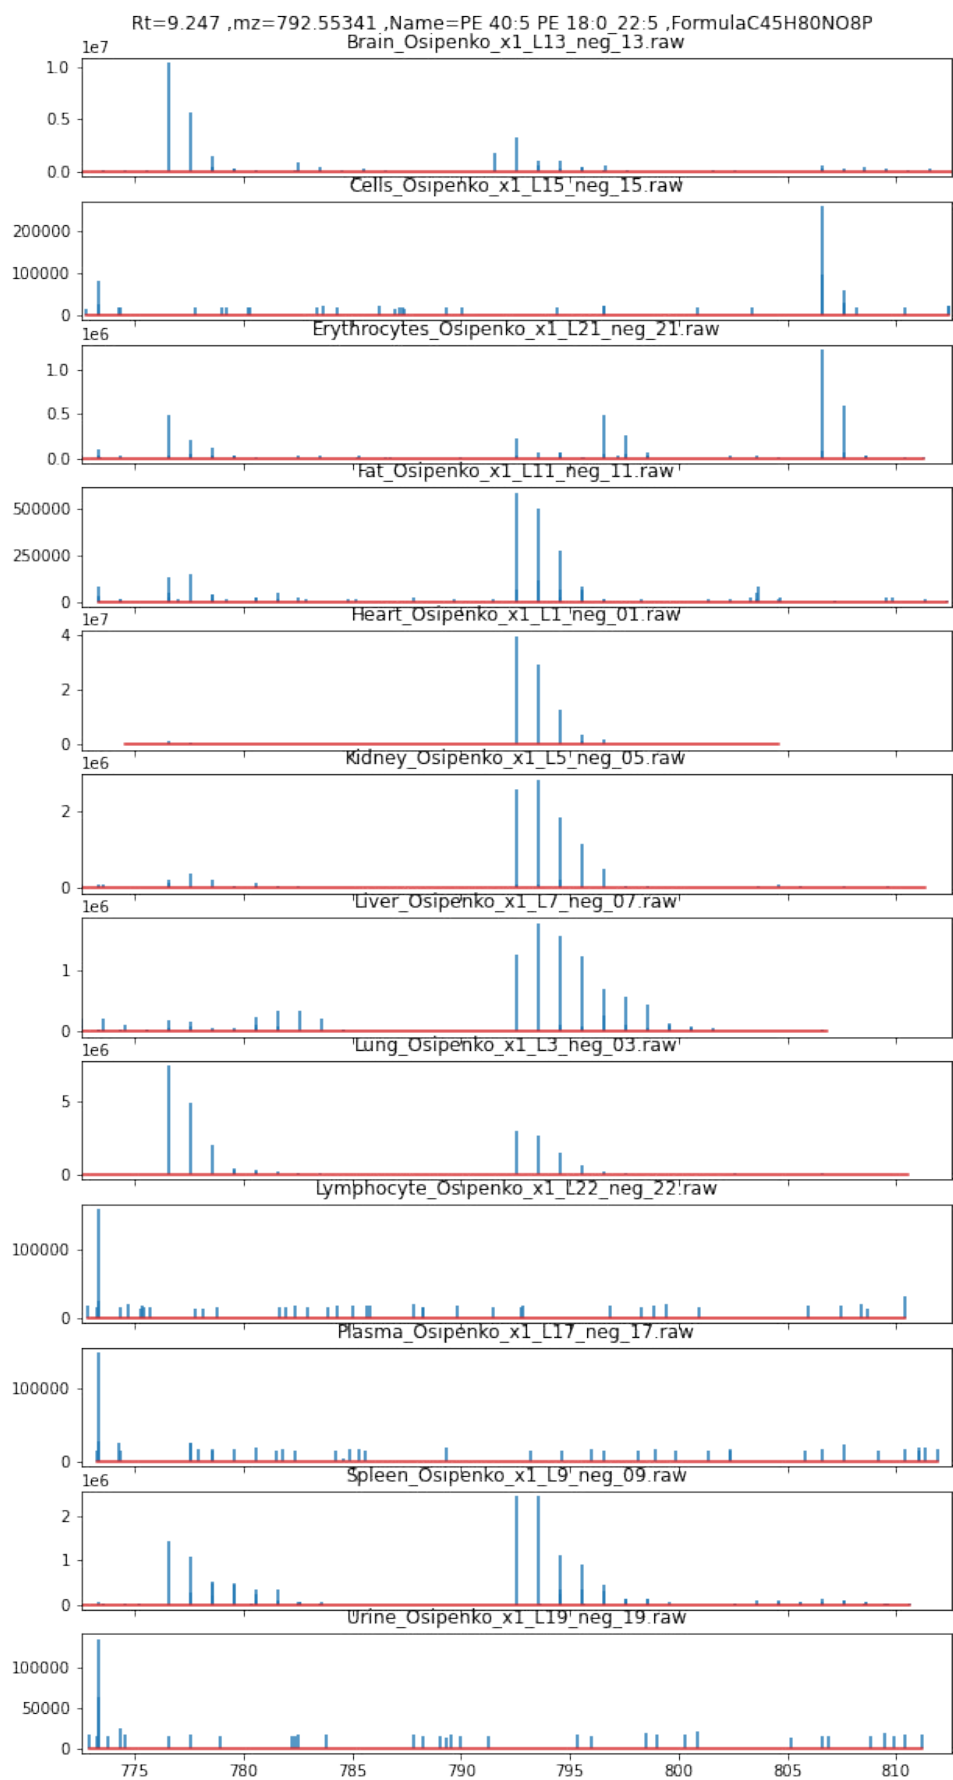

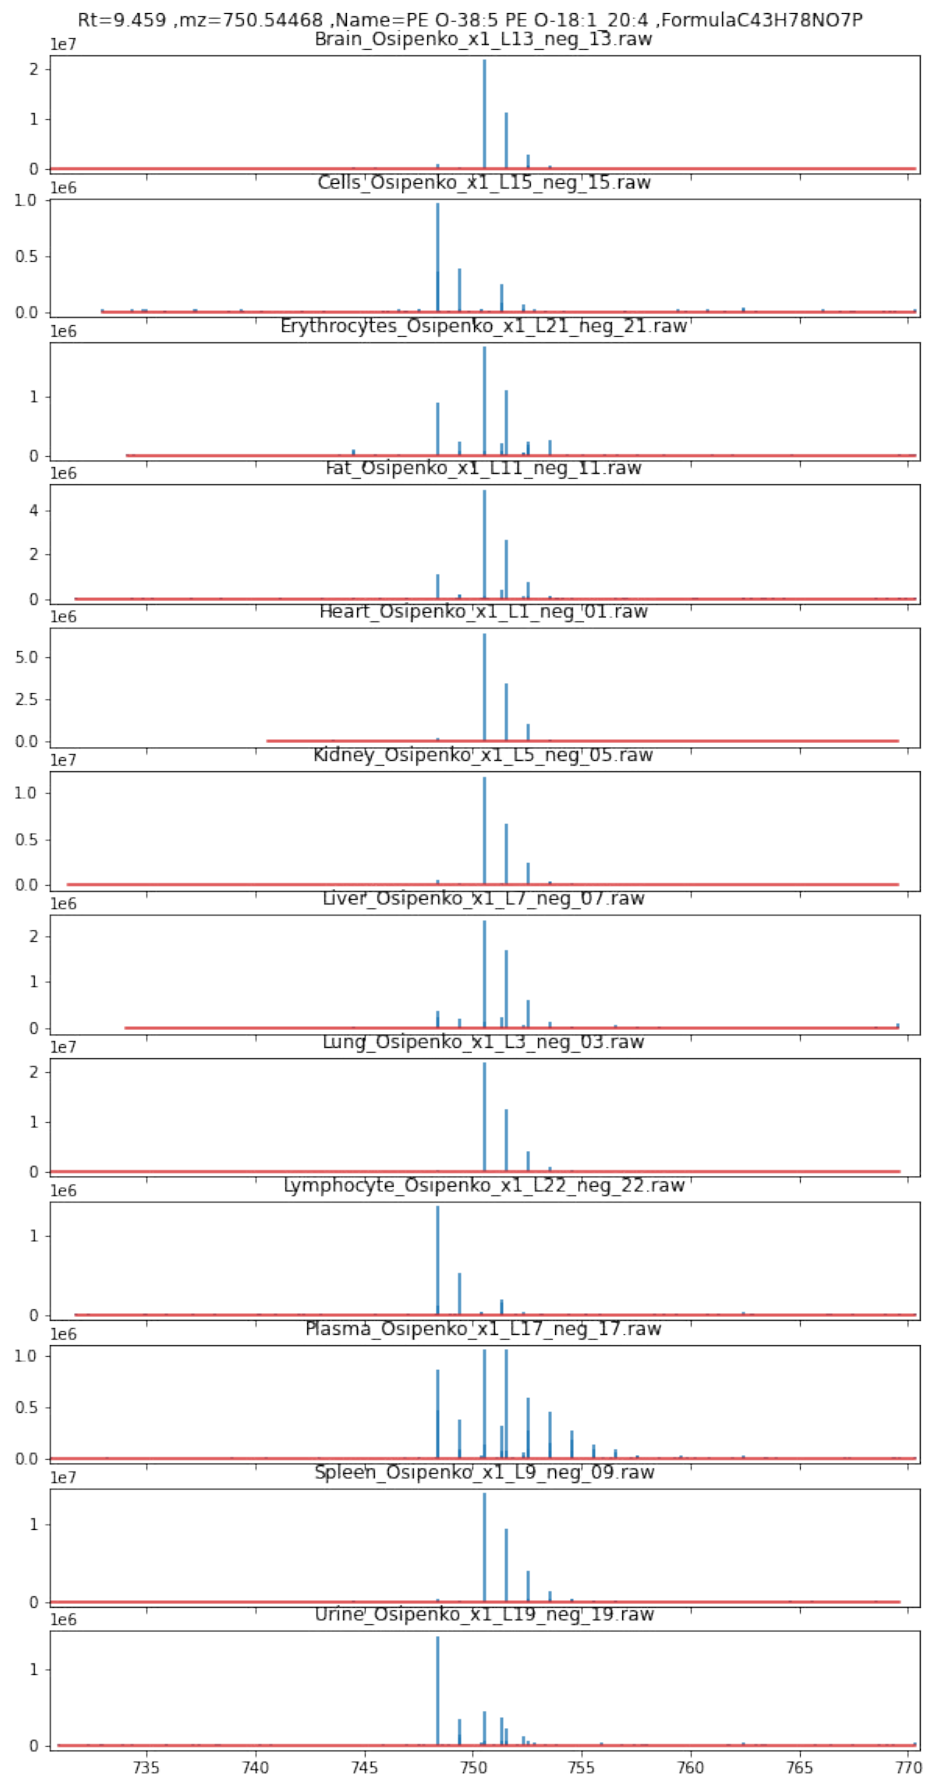

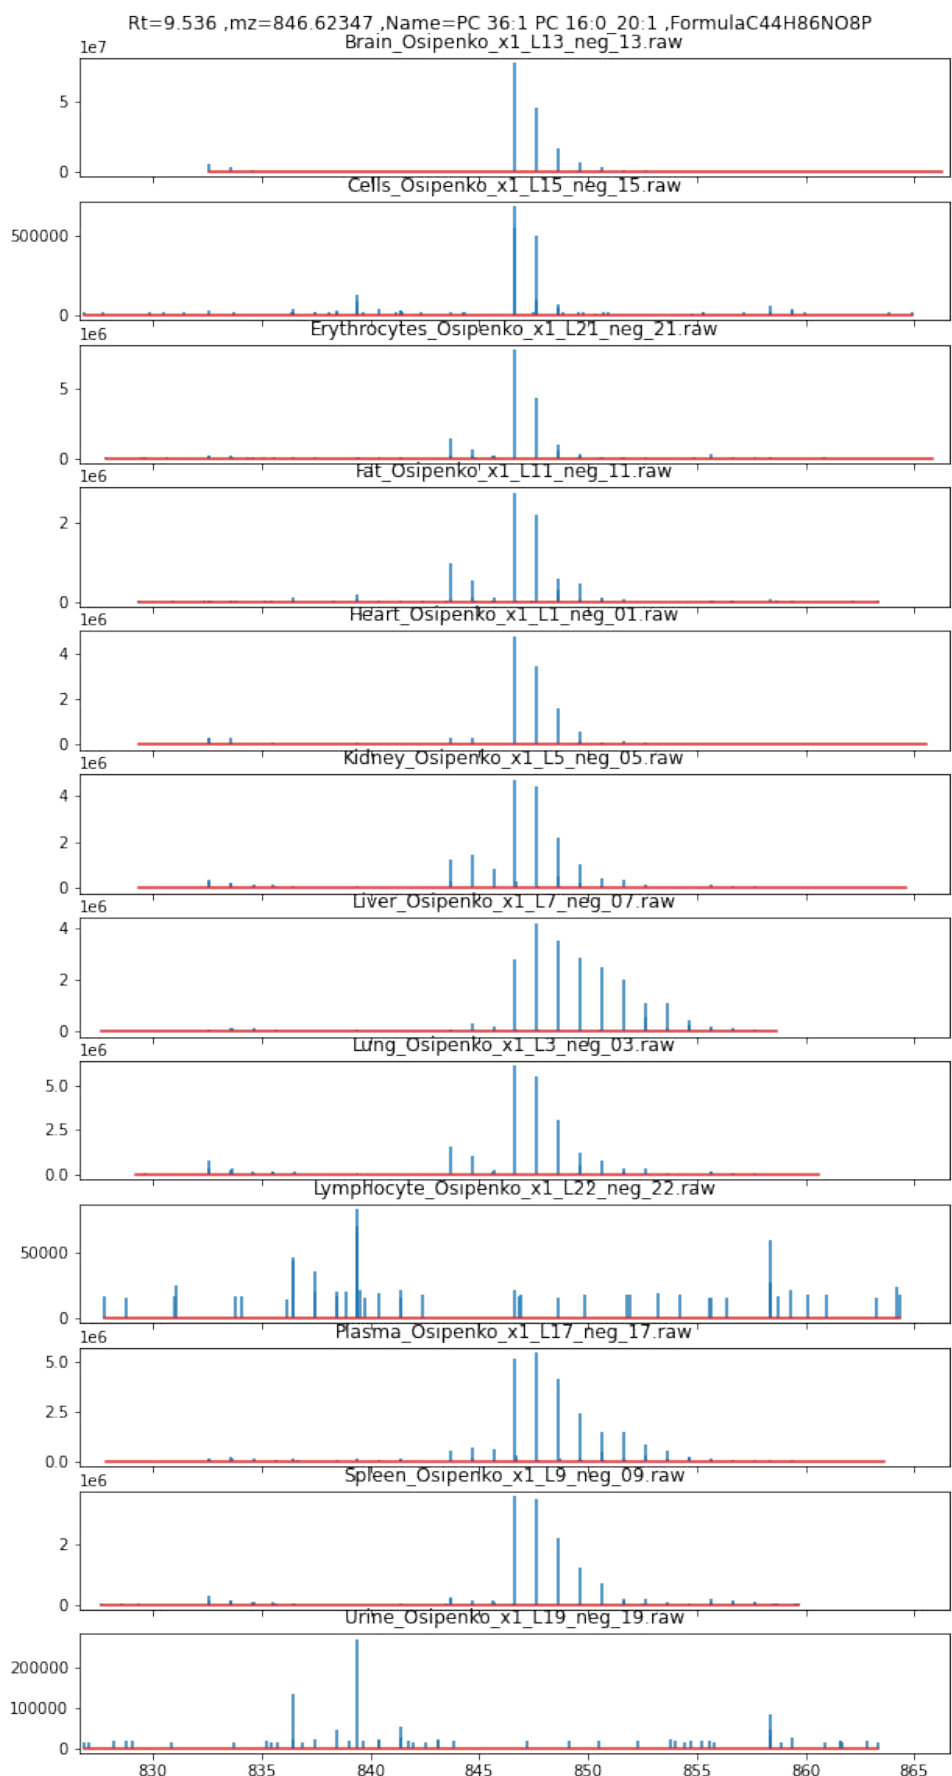

Rt=9.583 ,mz=869.67627 ,Name=SM 42:3 O2 SM 18:1 O2 24:2 ,FormulaC47H91N2O6P  
Brain\_Osipenko\_x1\_L13\_neg\_13.raw

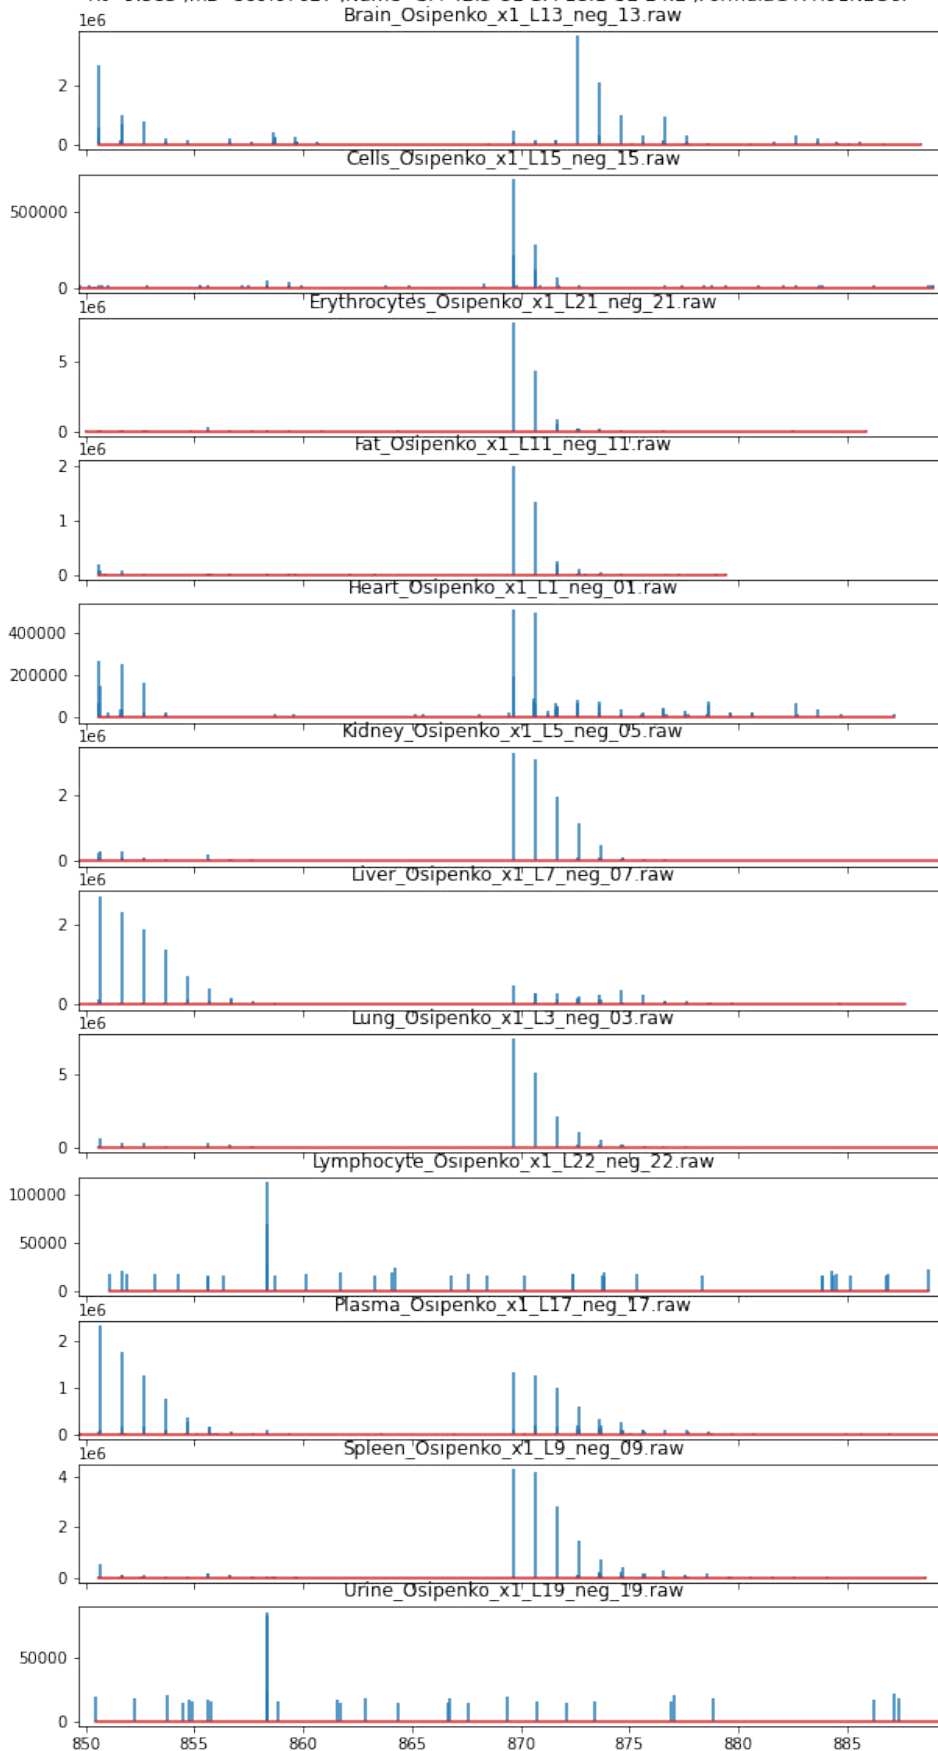

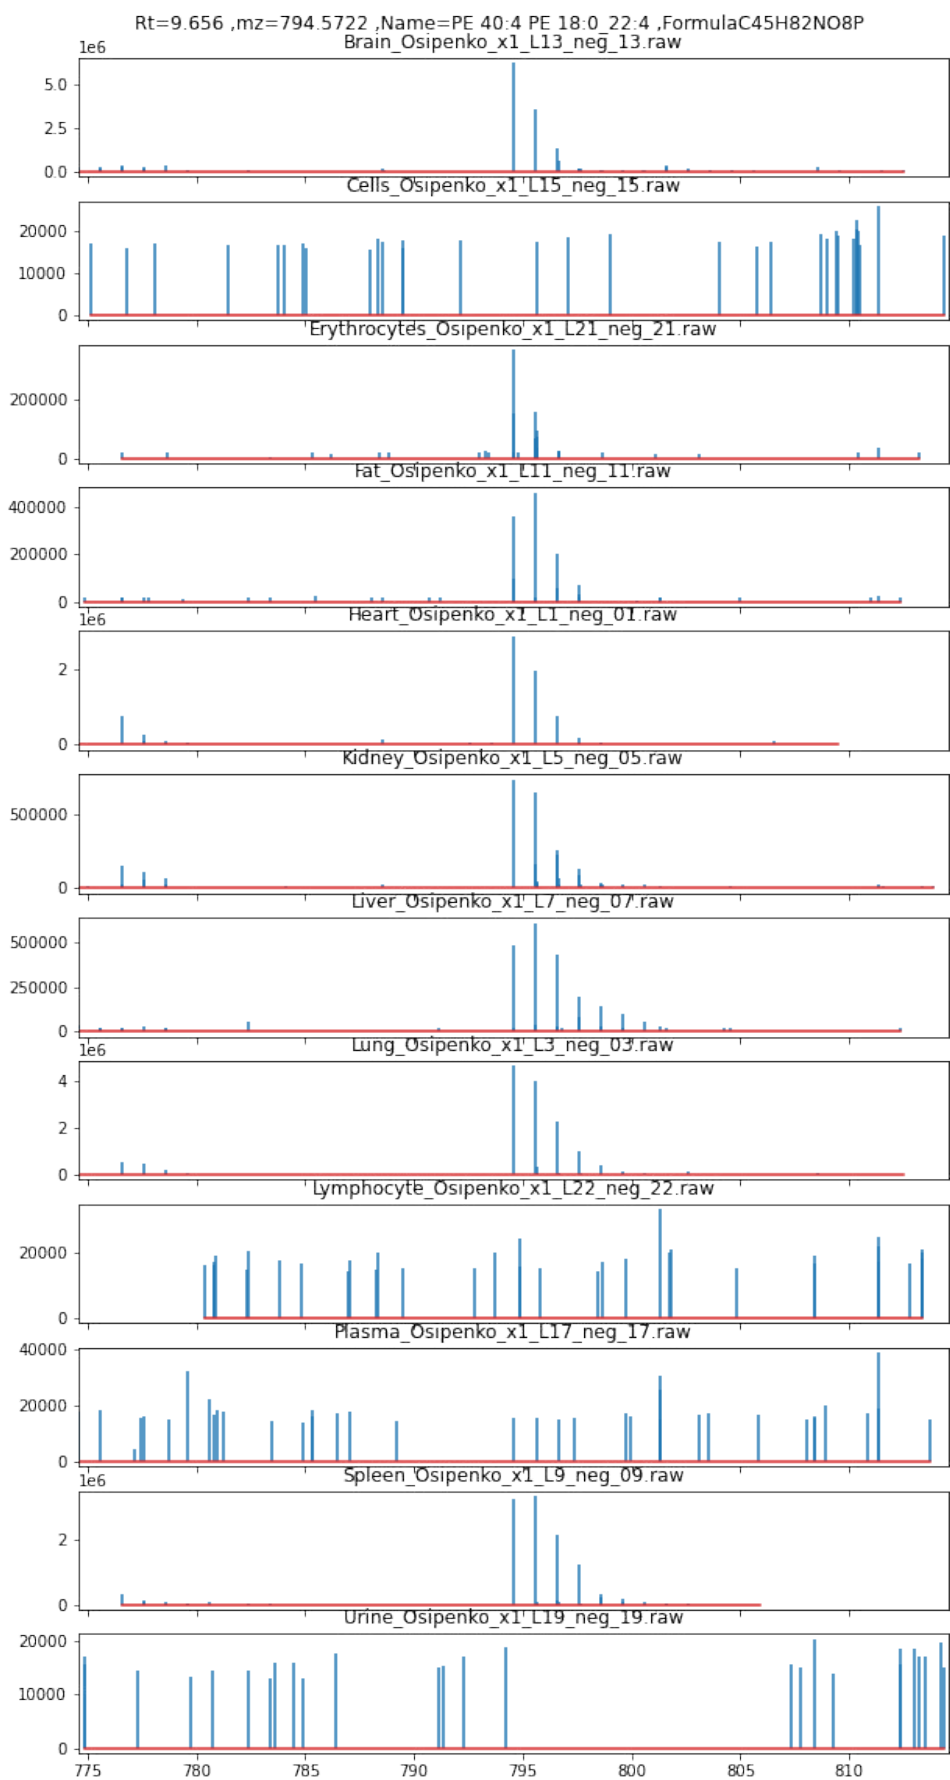

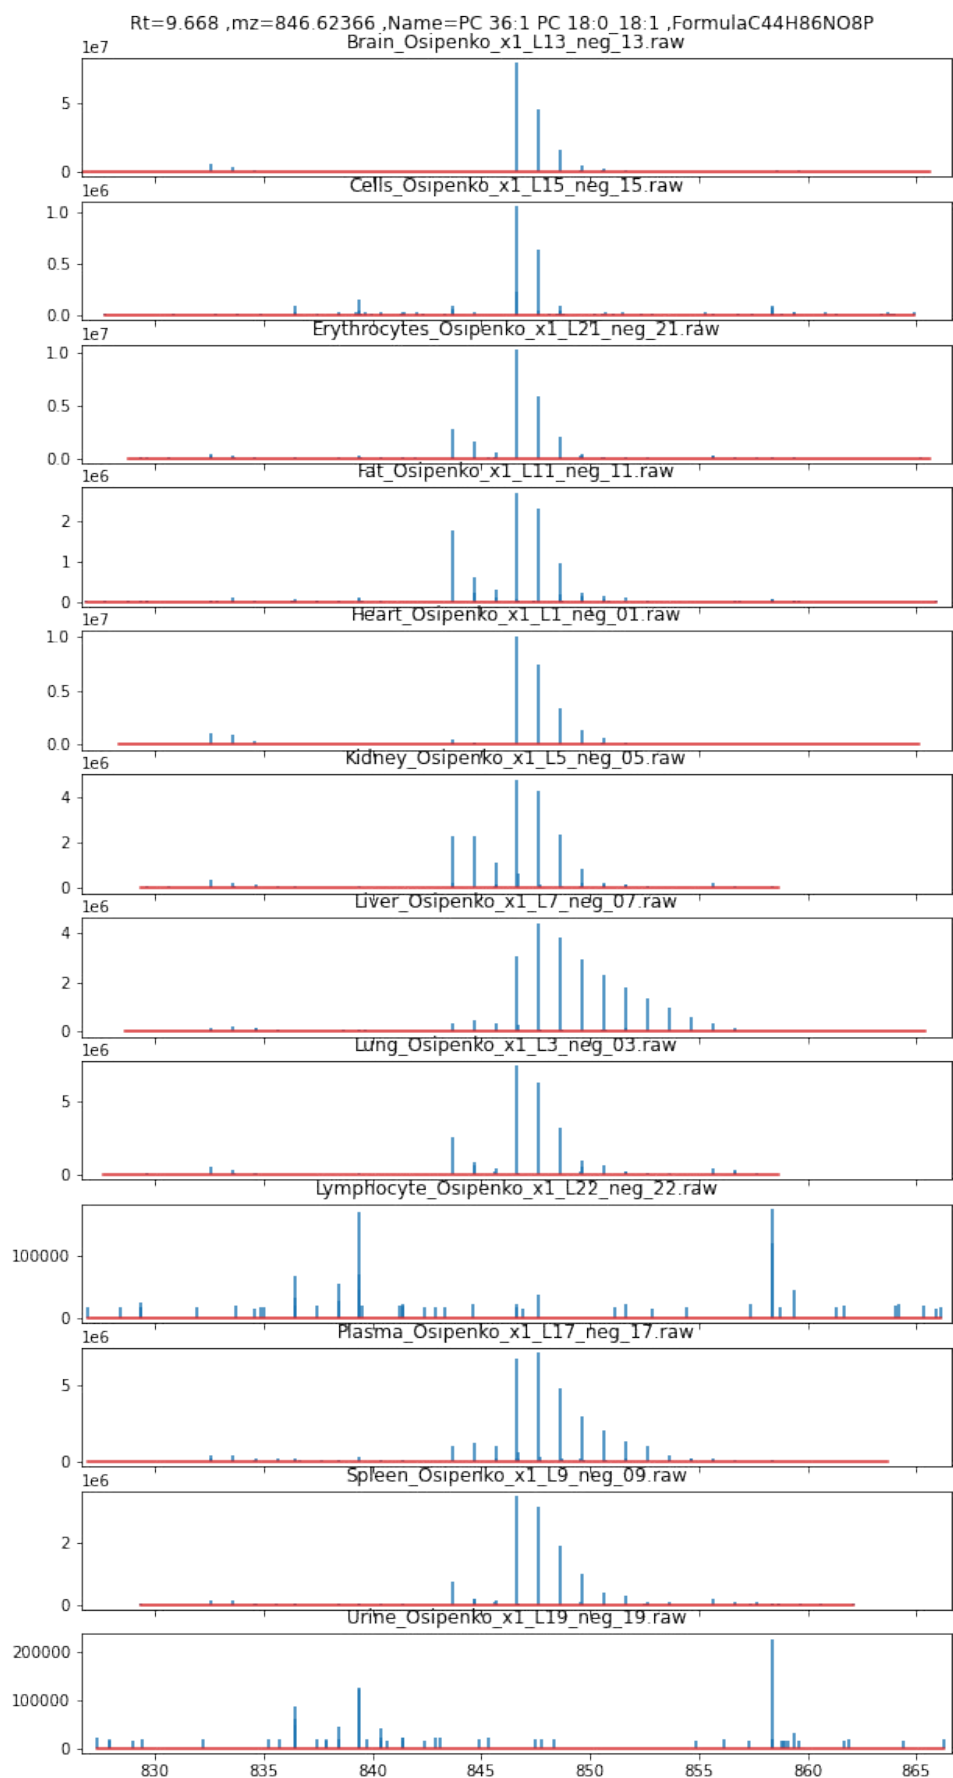



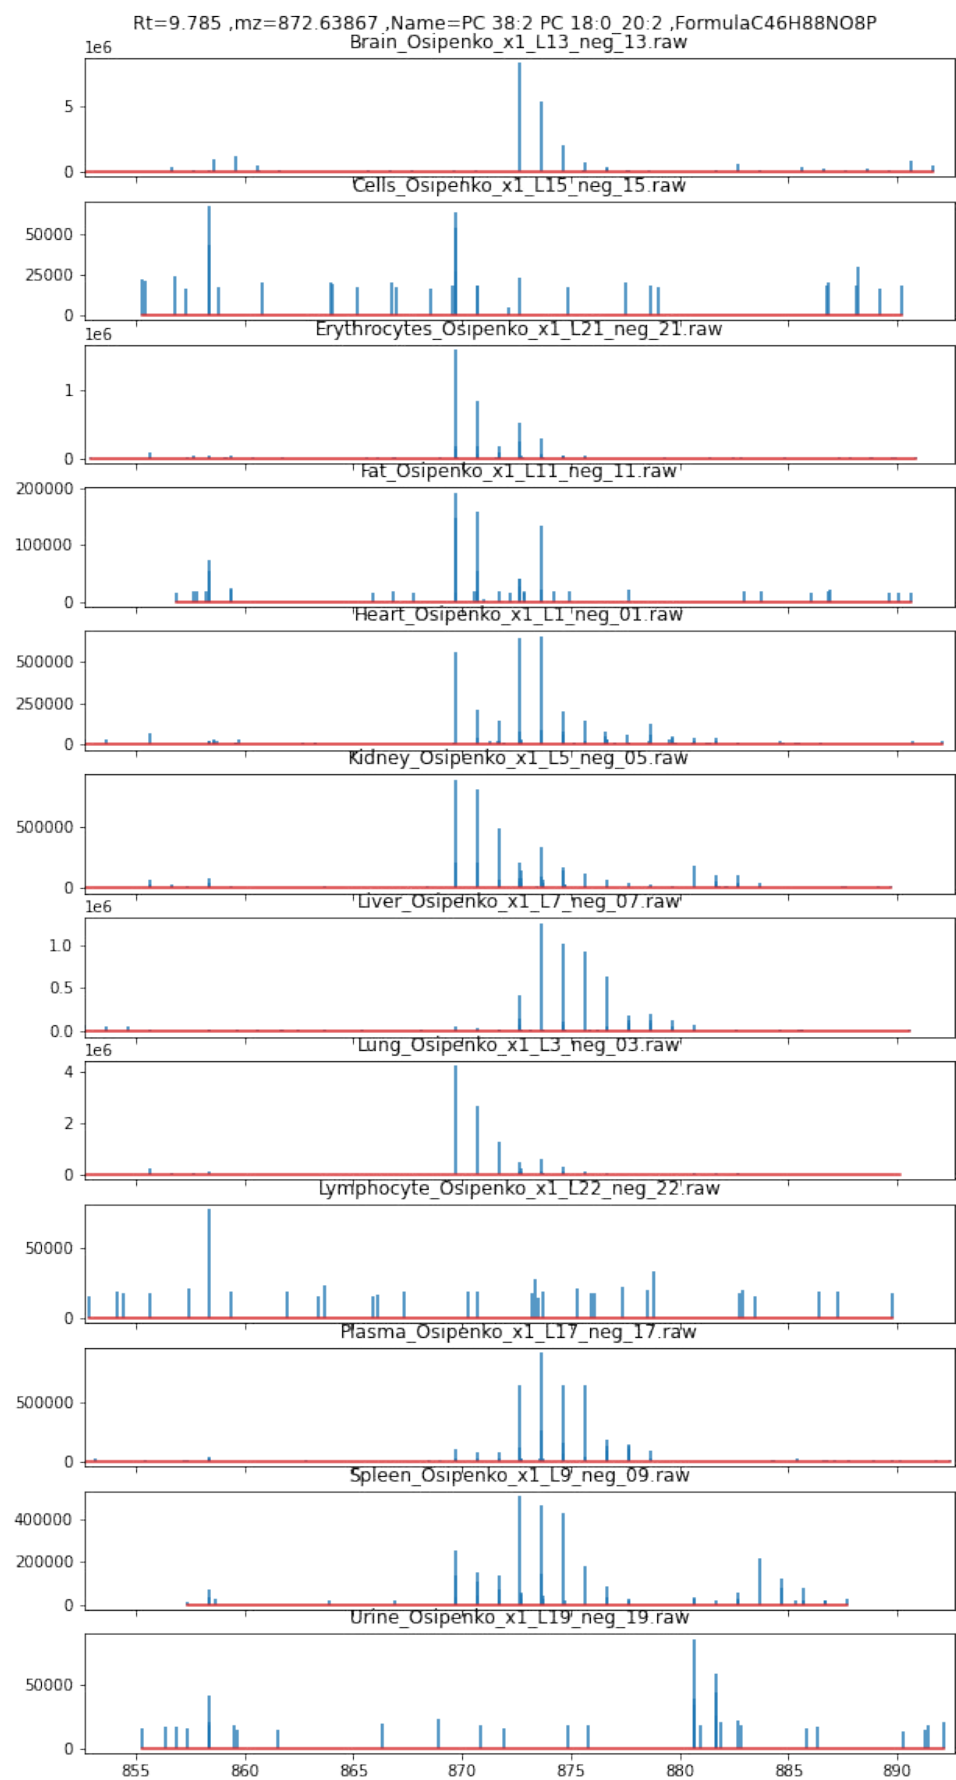

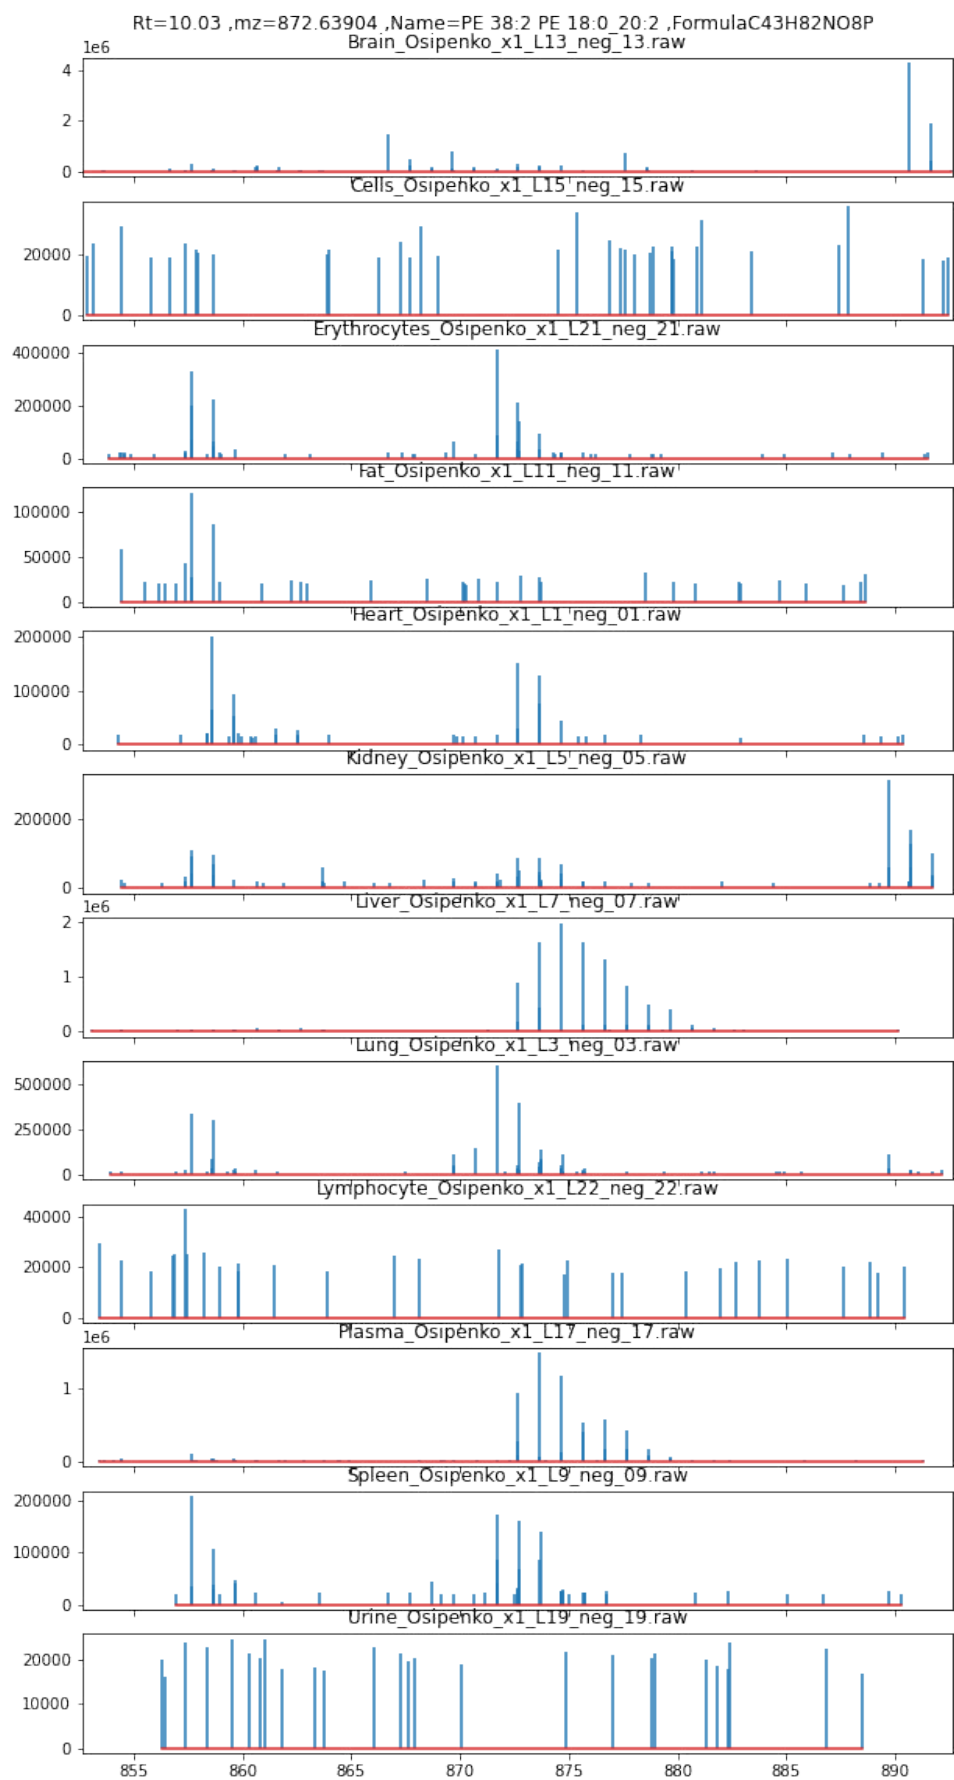

Rt=10.04 ,mz=871.69232 ,Name=SM 42:2 O2 ,FormulaC47H93N2O6P  
Brain\_Osipenko\_x1\_L13\_neg\_13.raw

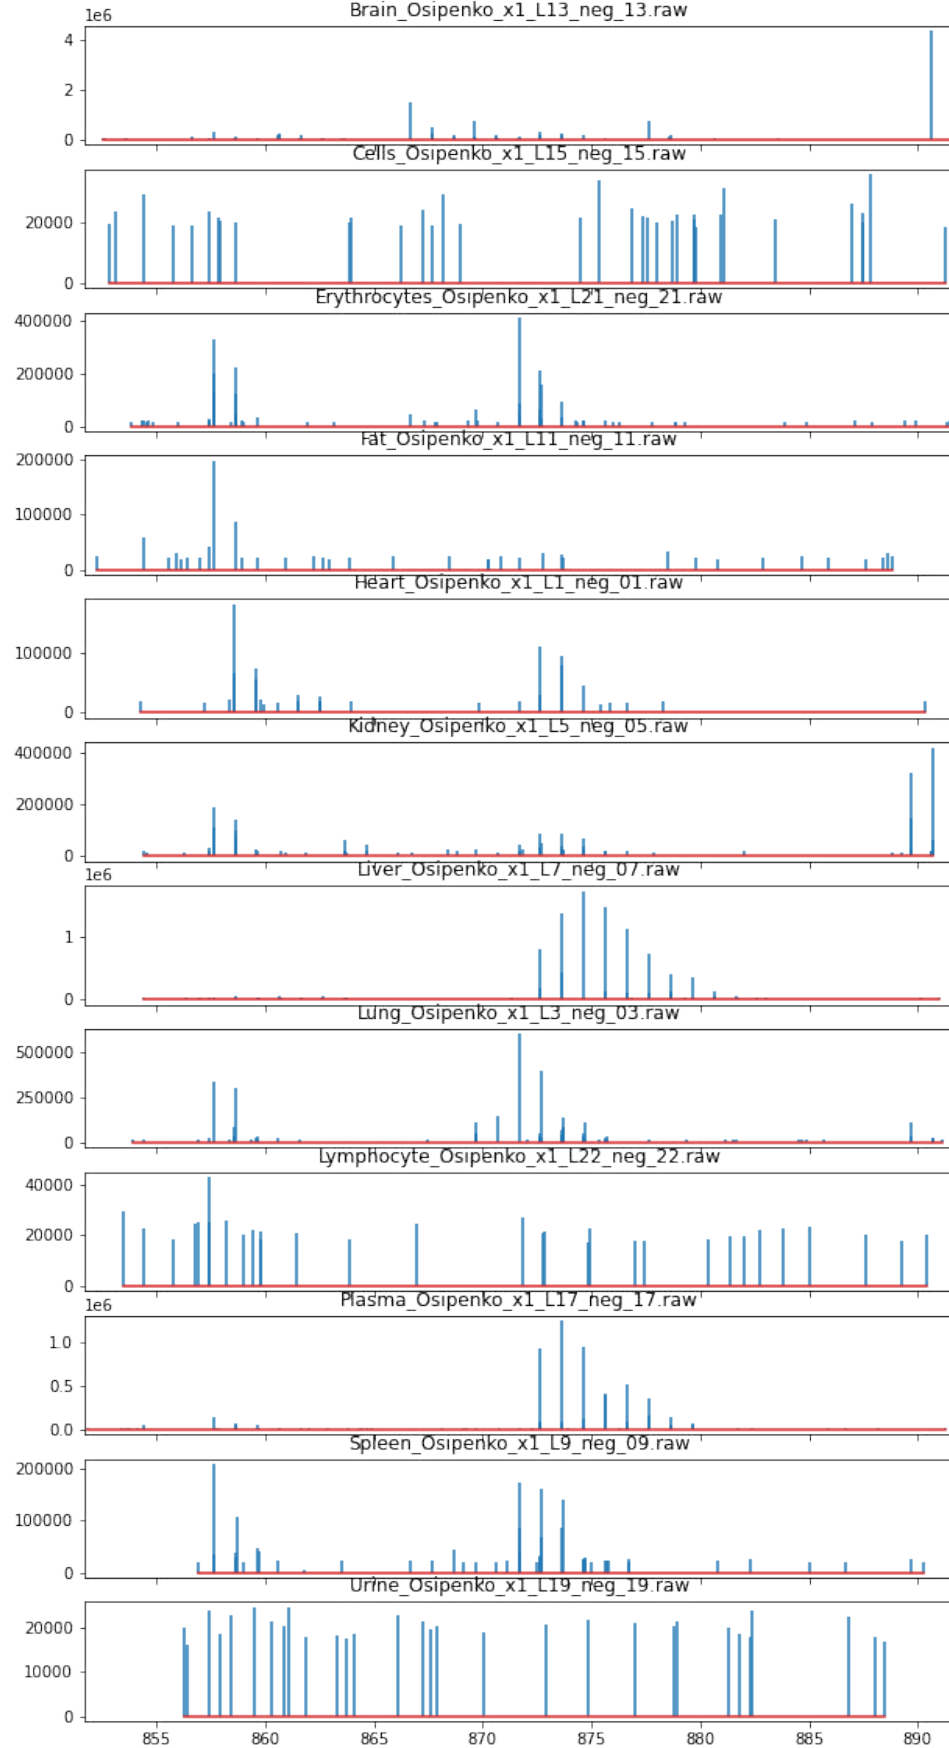

Rt=10.045 ,mz=831.66272 ,Name=SM 39:1 O2 ,FormulaC44H89N2O6P  
Brain\_Osipenko\_x1\_L13\_neg\_13.raw

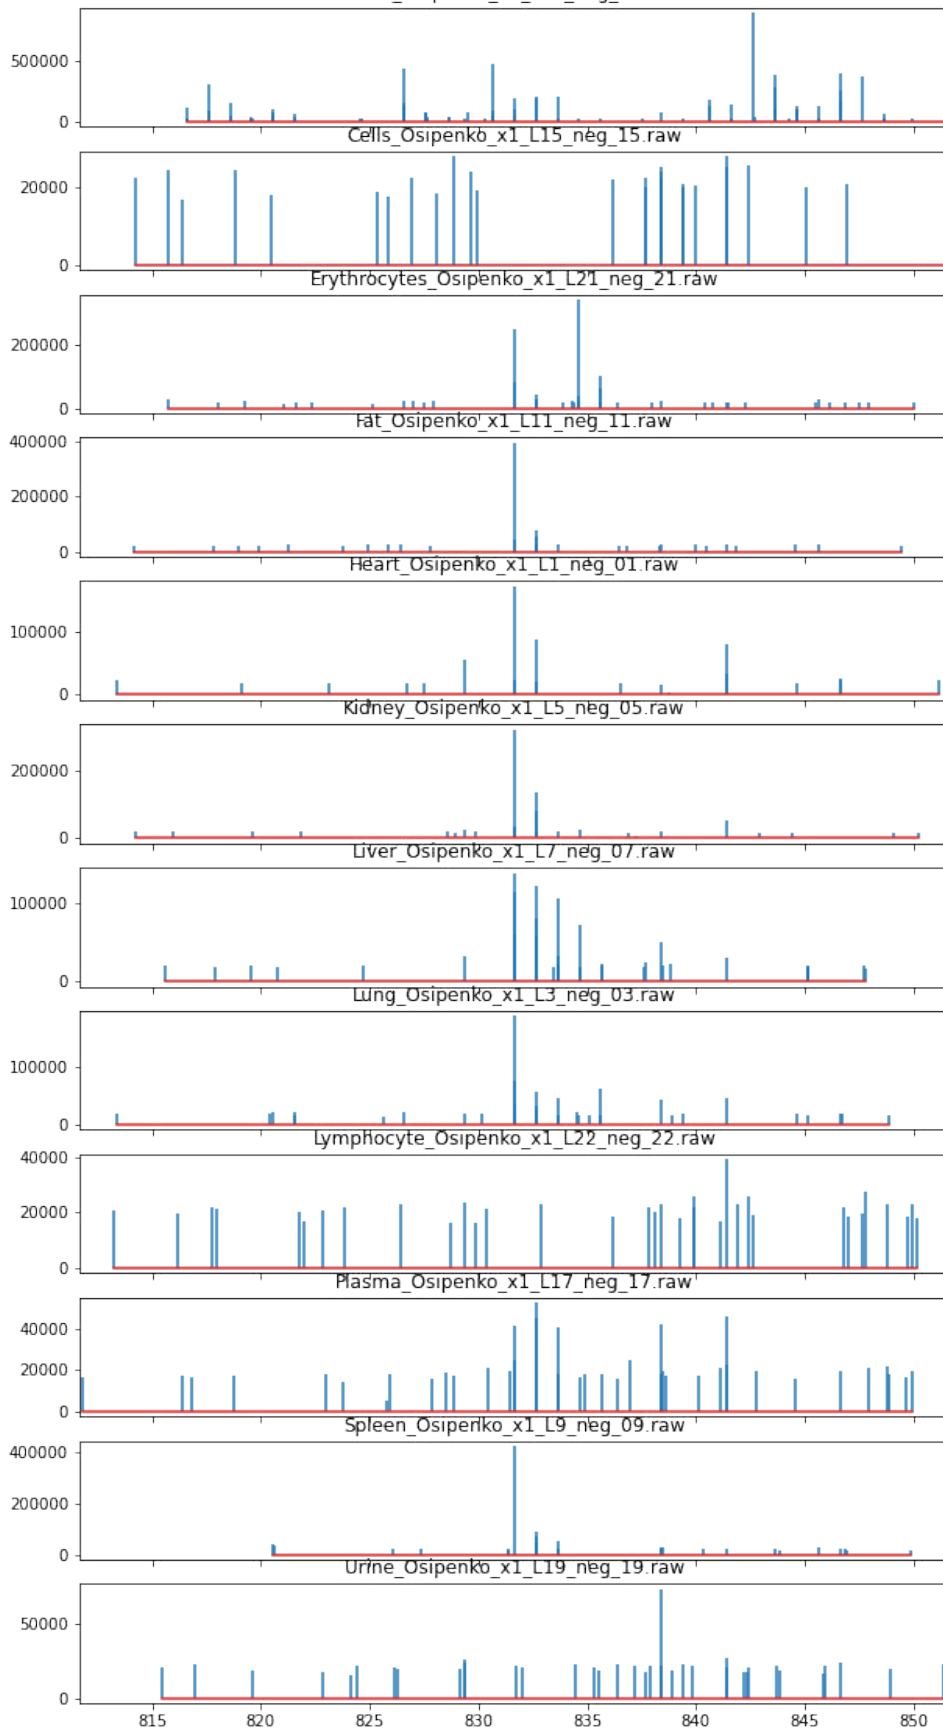

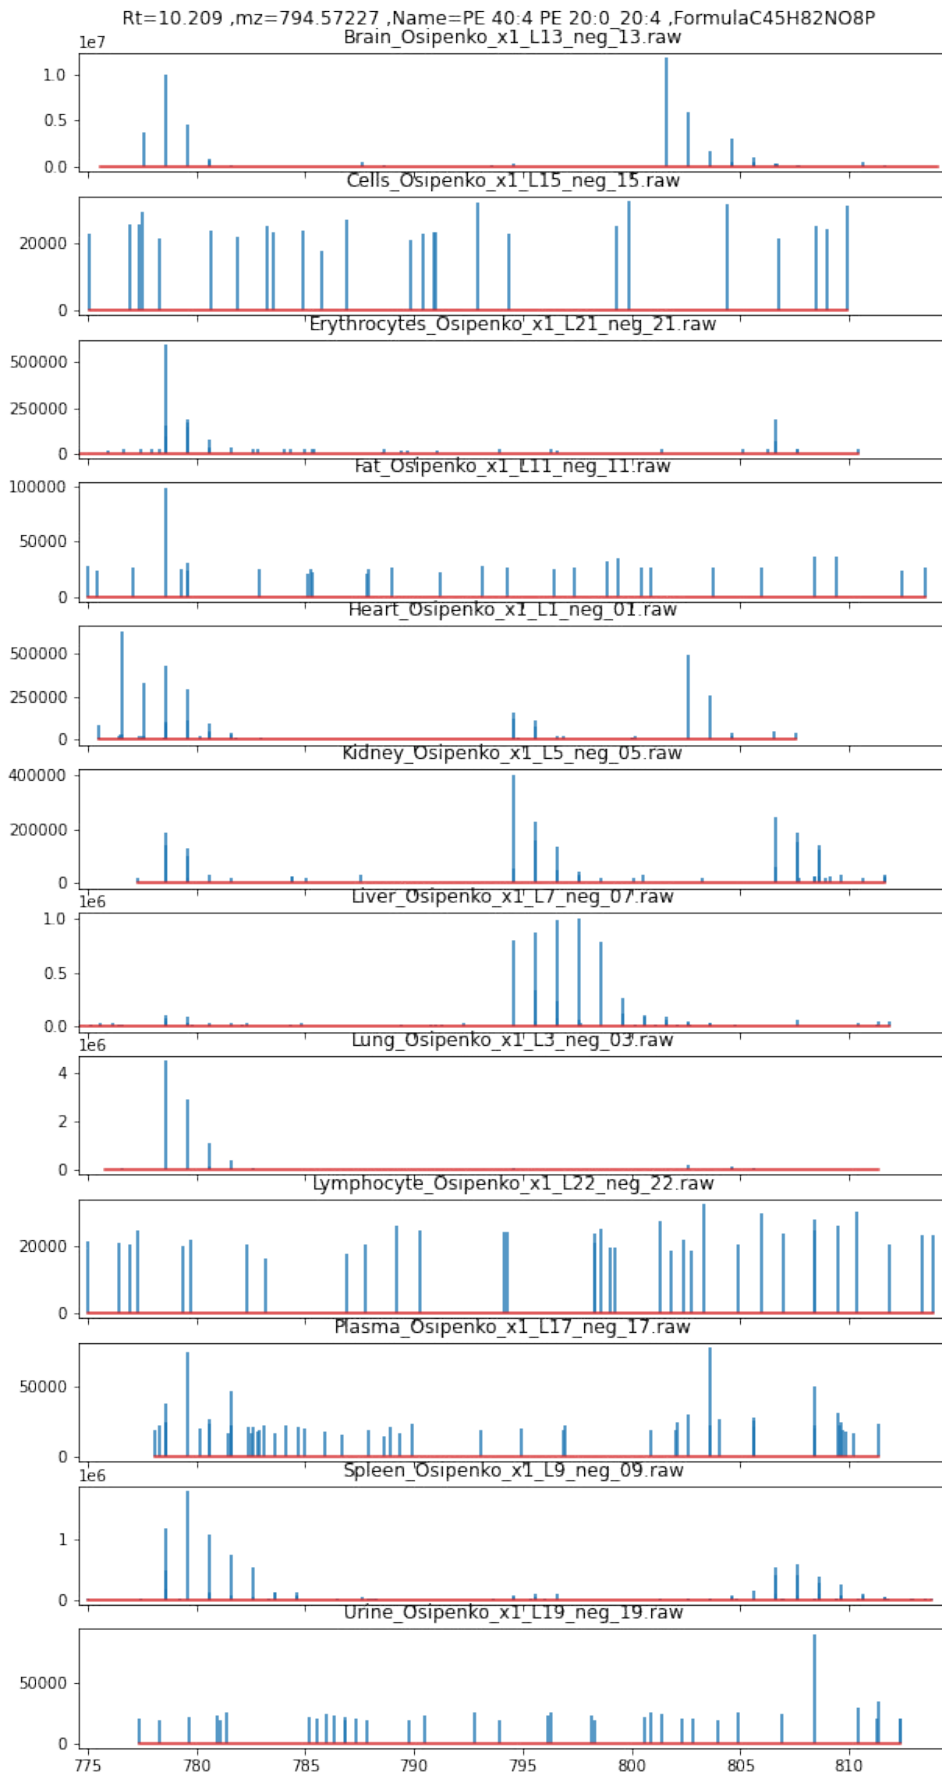

Rt=10.315 ,mz=423.42203 ,Name=FA 28:0 ,FormulaC28H56O2  
Brain\_Osipenko\_x1\_L13\_neg\_13.raw

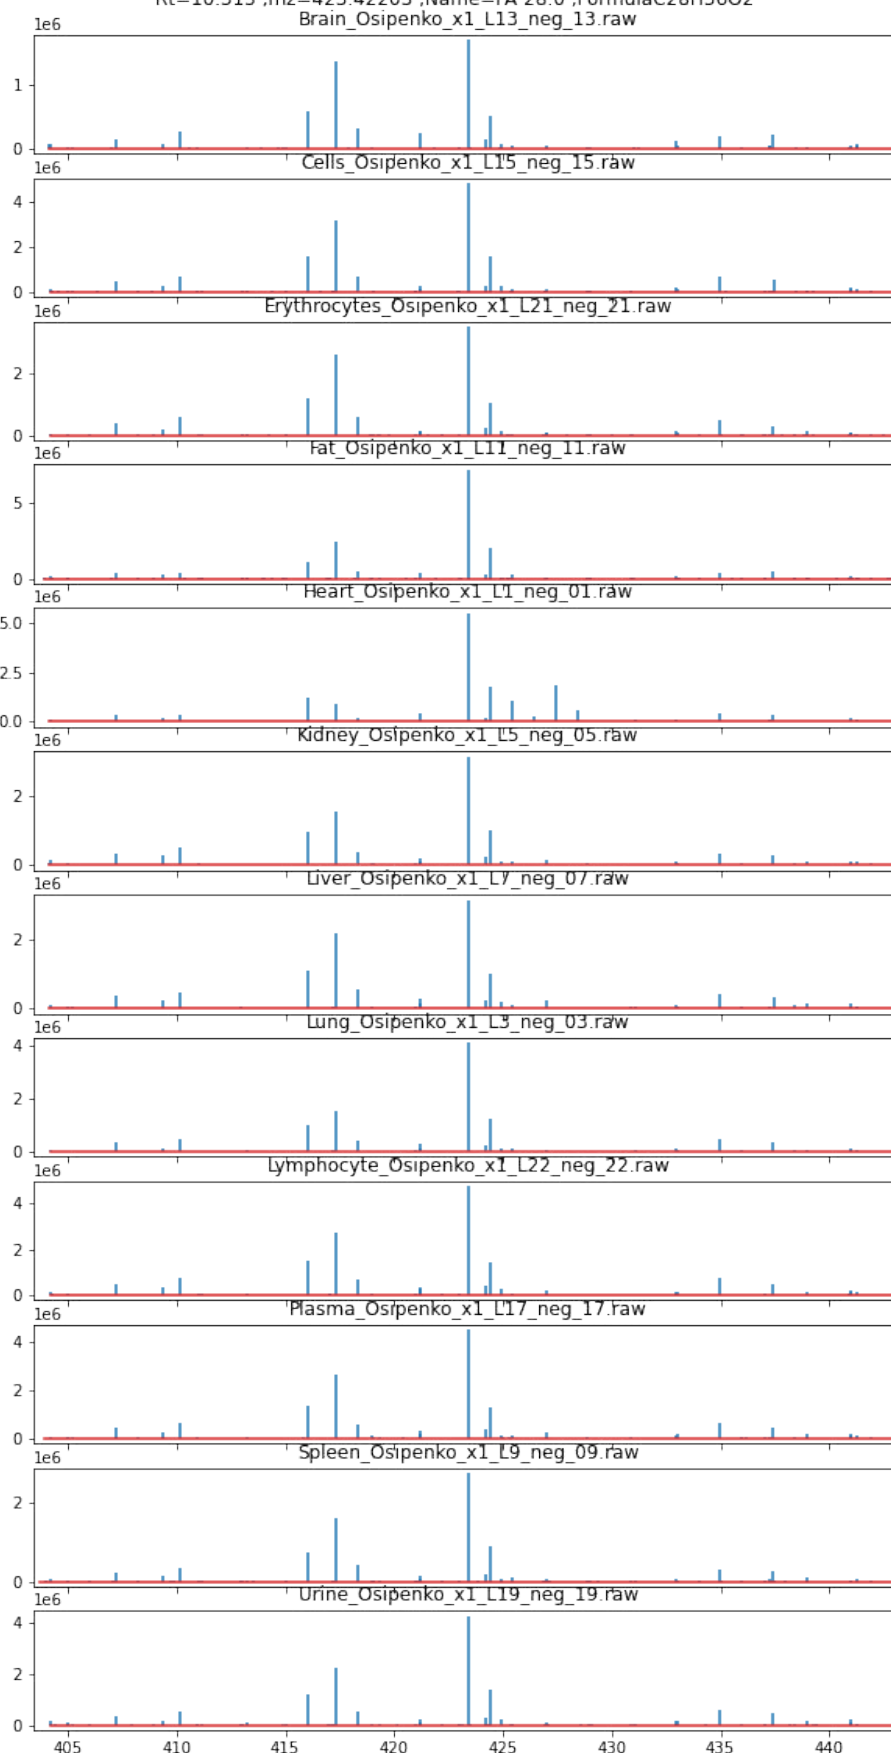

Rt=10.332 ,mz=702.60529 ,Name=Cer 42:4 O2 Cer 18:2 O2 24:2 ,FormulaC42H77NO3  
Brain\_Osipenko\_x1\_L13\_neg\_13.raw

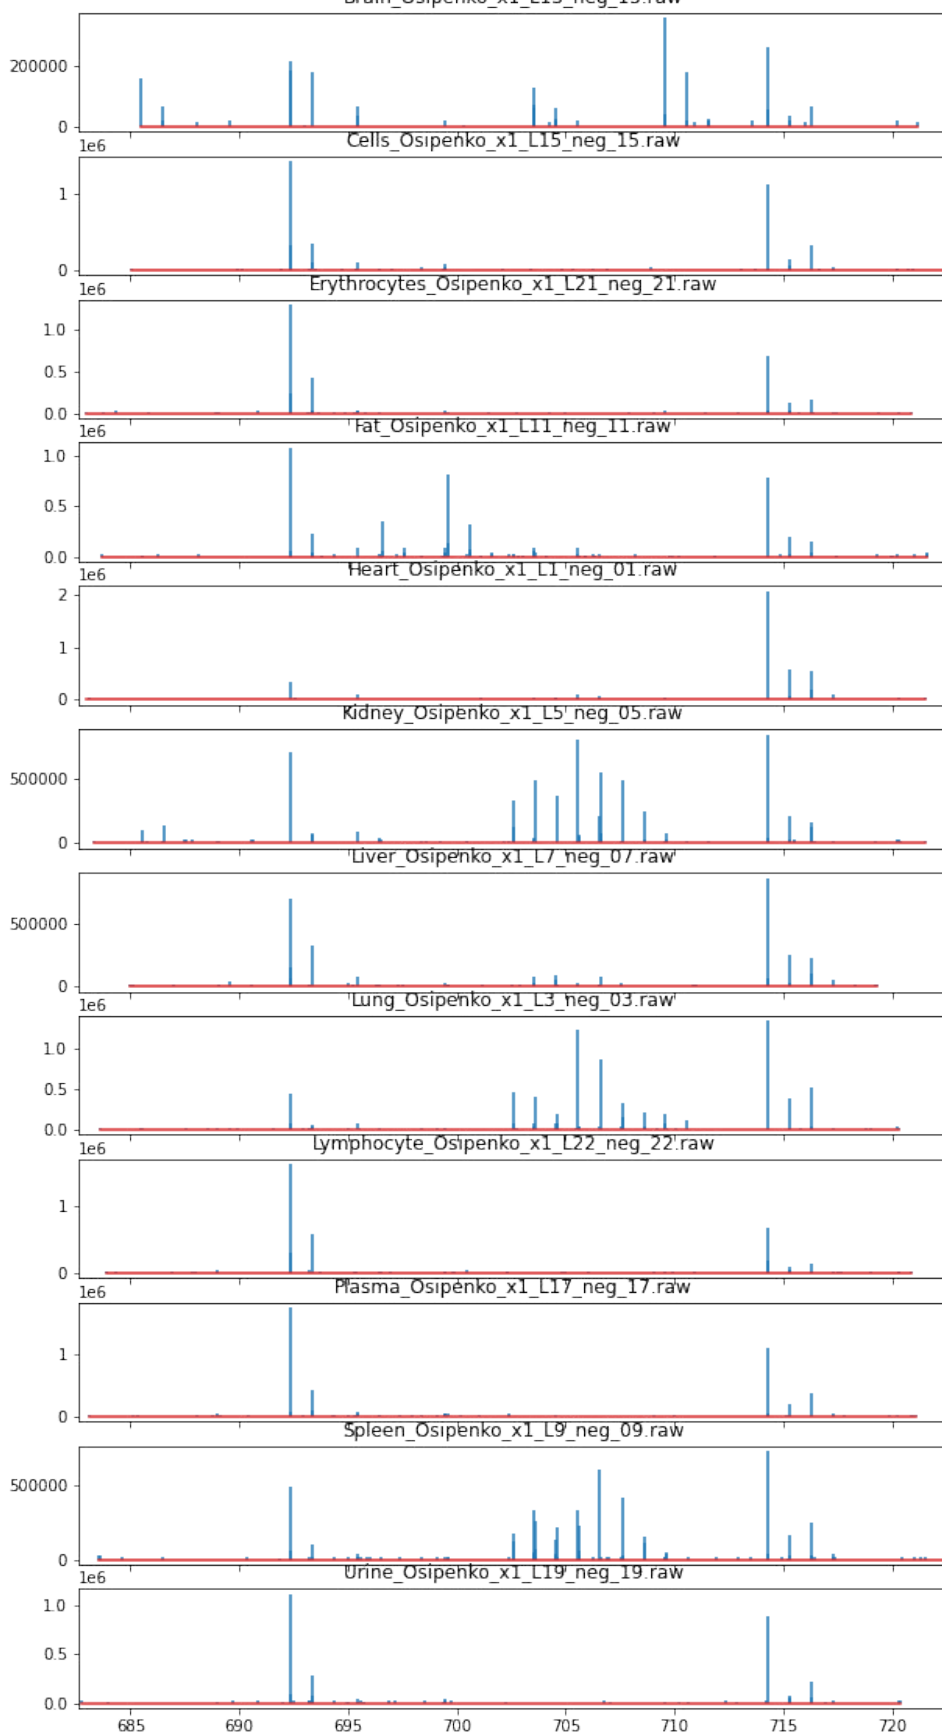

Rt=10.475 ,mz=778.57806 ,Name=PE O-40:5 PE O-18:1 22:4 ,FormulaC45H82NO7P  
Brain\_Osipenko\_x1\_L13\_neg\_13.raw

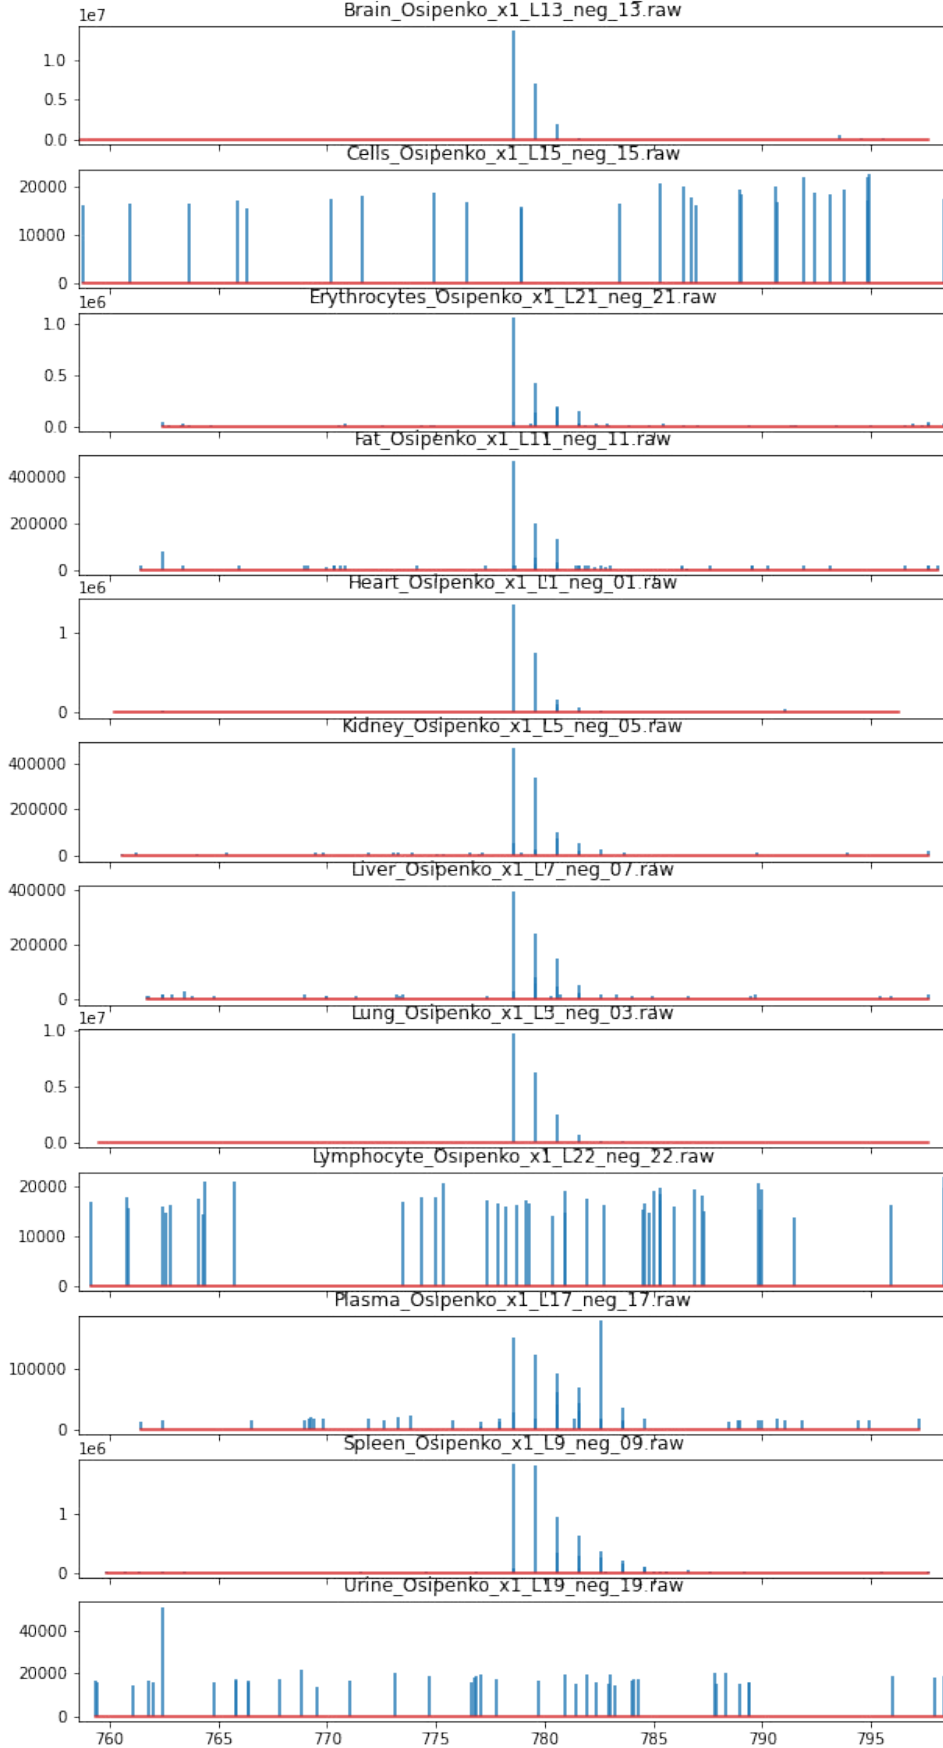



Rt=10.883 ,mz=871.69257 ,Name=SM 42:2 O2 SM 18:1 O2 24:1 ,FormulaC47H93N2O6P

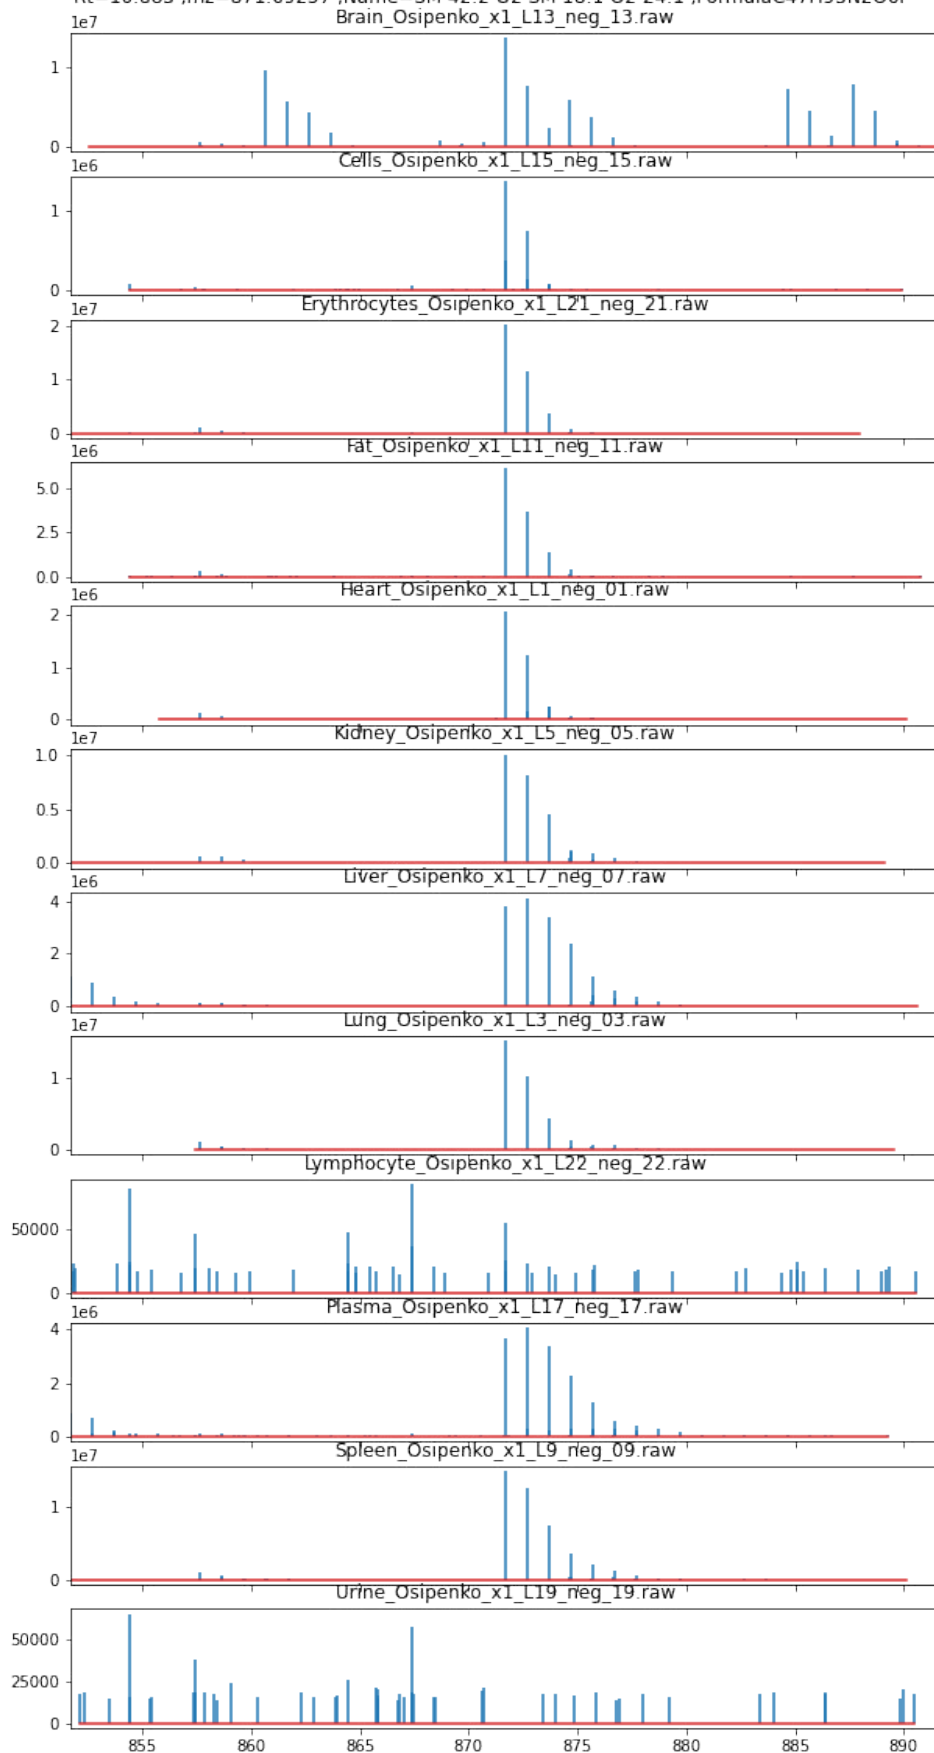

Rt=10.896 ,mz=845.67285 ,Name=SM 40:1 O2 SM 18:1 O2 22:0 ,FormulaC45H91N2O6P  
Brain\_Osipenko\_x1\_L13\_neg\_13.raw

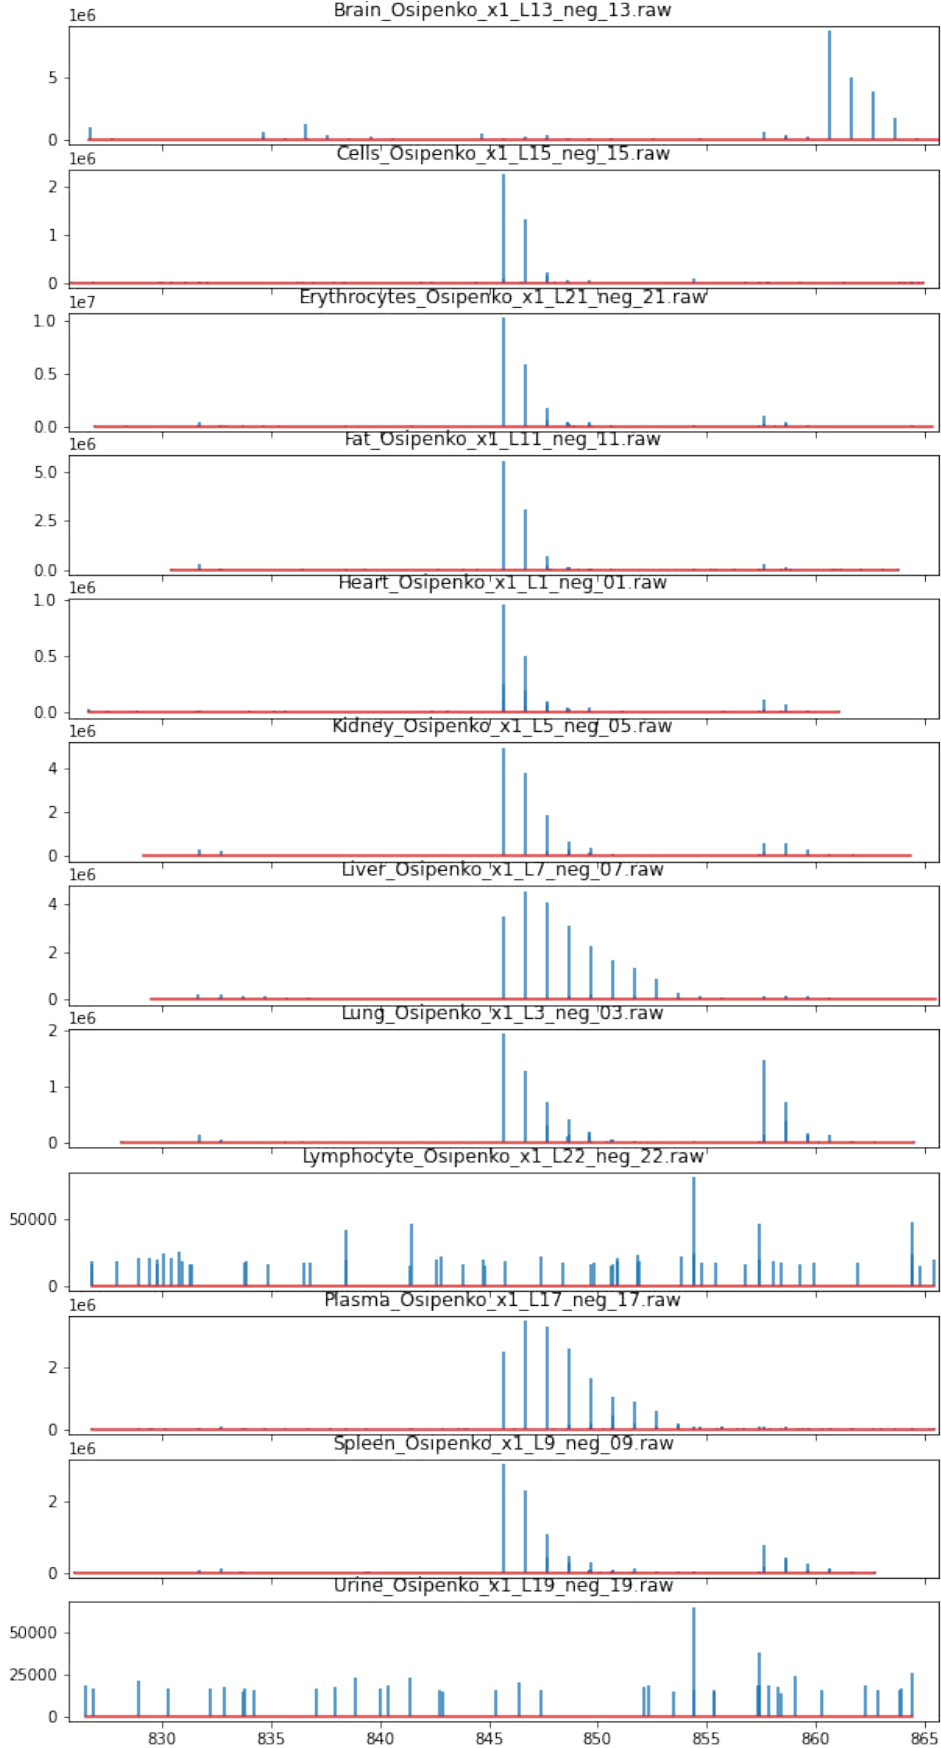

Rt=11.33 ,mz=871.69257 ,Name=SM 42:2 O2 SM 18:2 O2 24:0 ,FormulaC47H93N2O6P  
Brain\_Osipenko\_x1\_L13\_neg\_13.raw

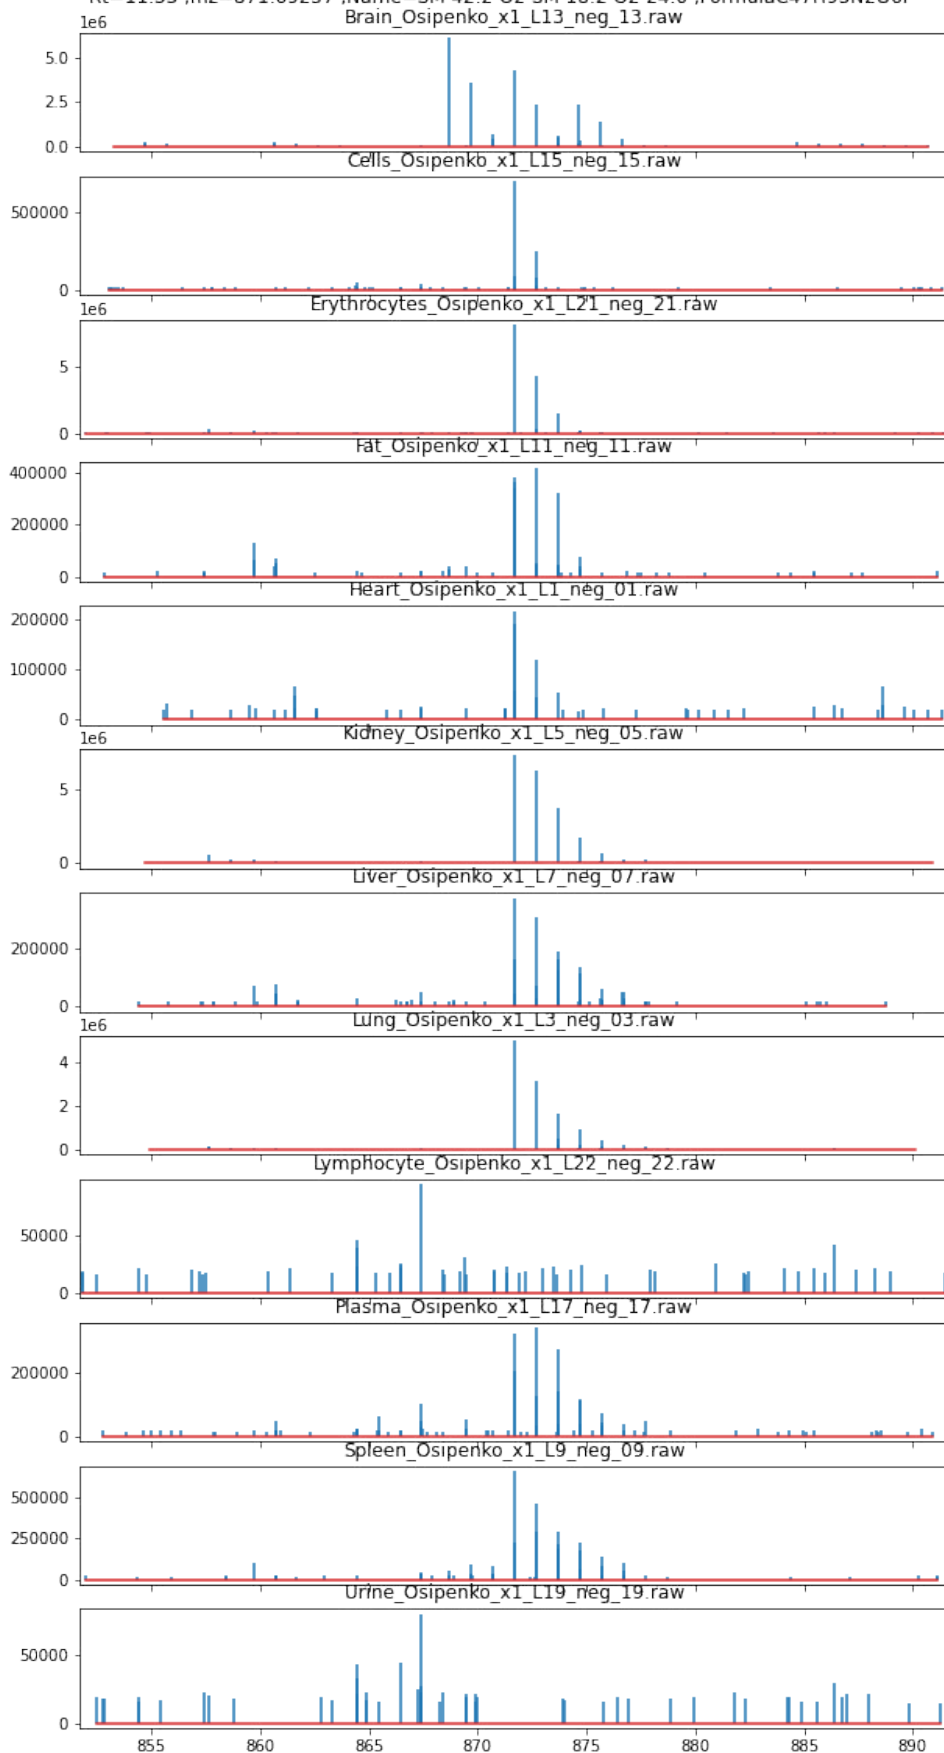

Rt=12.76 ,mz=873.7038 ,Name=SM 42:1 O2 SM 18:1 O2 24:0 ,FormulaC47H95N2O6P  
Brain\_Osipenko\_x1\_L13\_neg\_13.raw

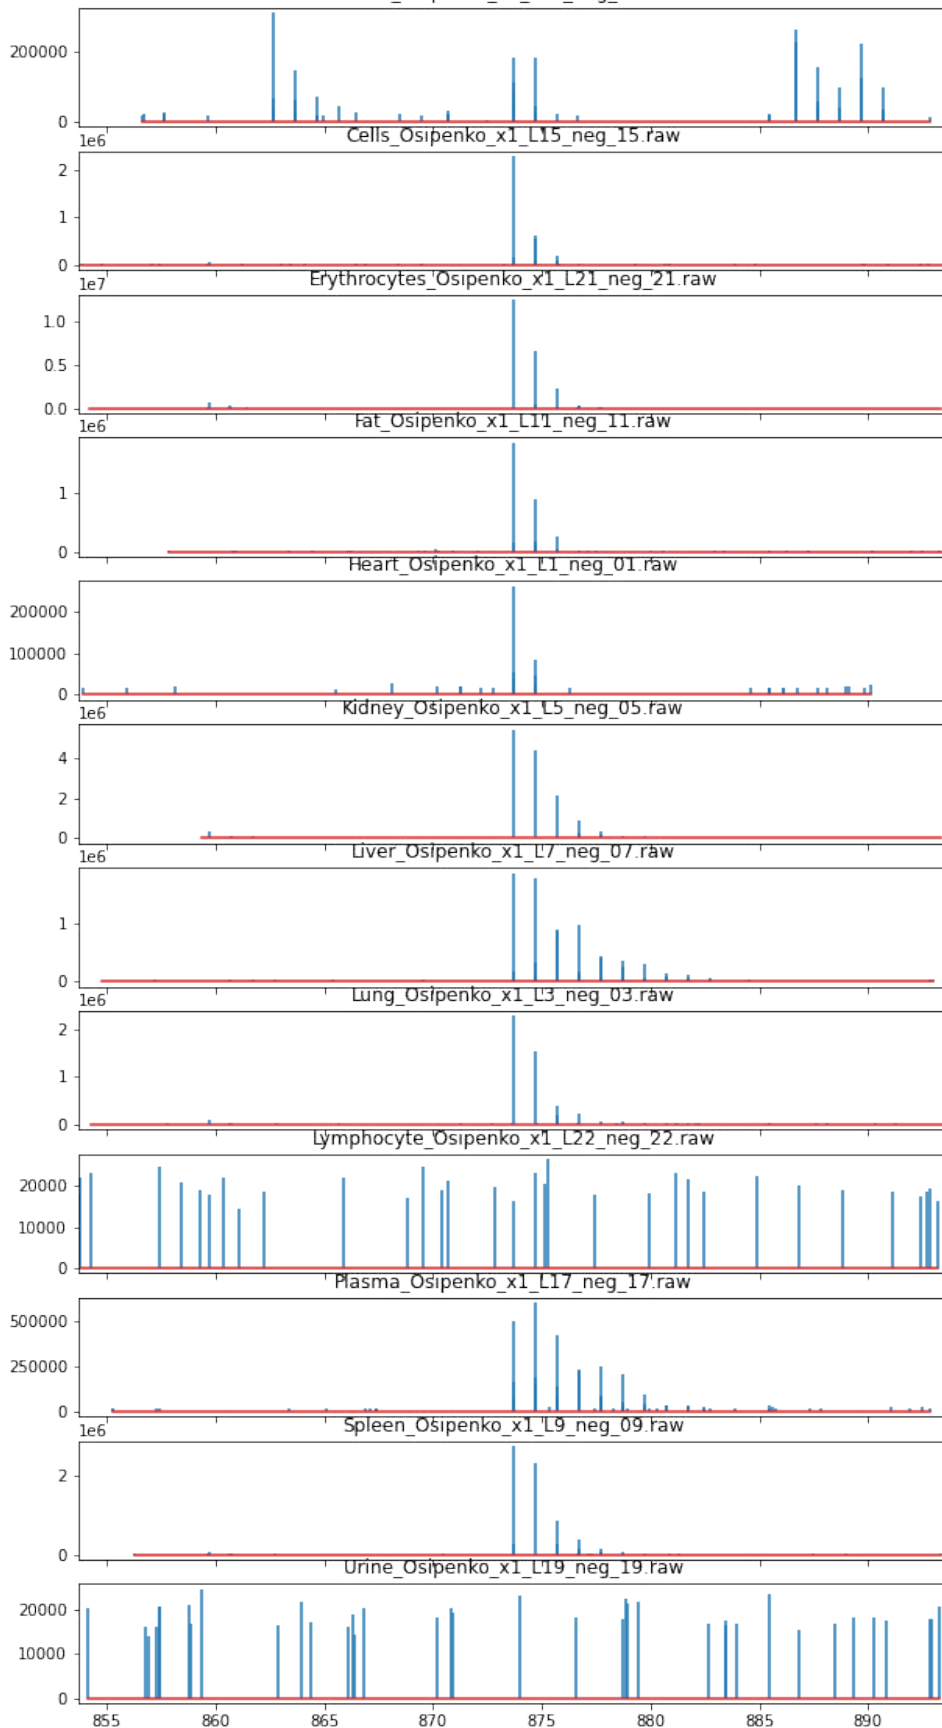

Rt=13.145 ,mz=620.60101 ,Name=Cer 40:1 O2 Cer 18:1 O2 22:0 ,FormulaC40H79NO3  
Brain\_Osipenko\_x1\_L13\_neg\_13.raw

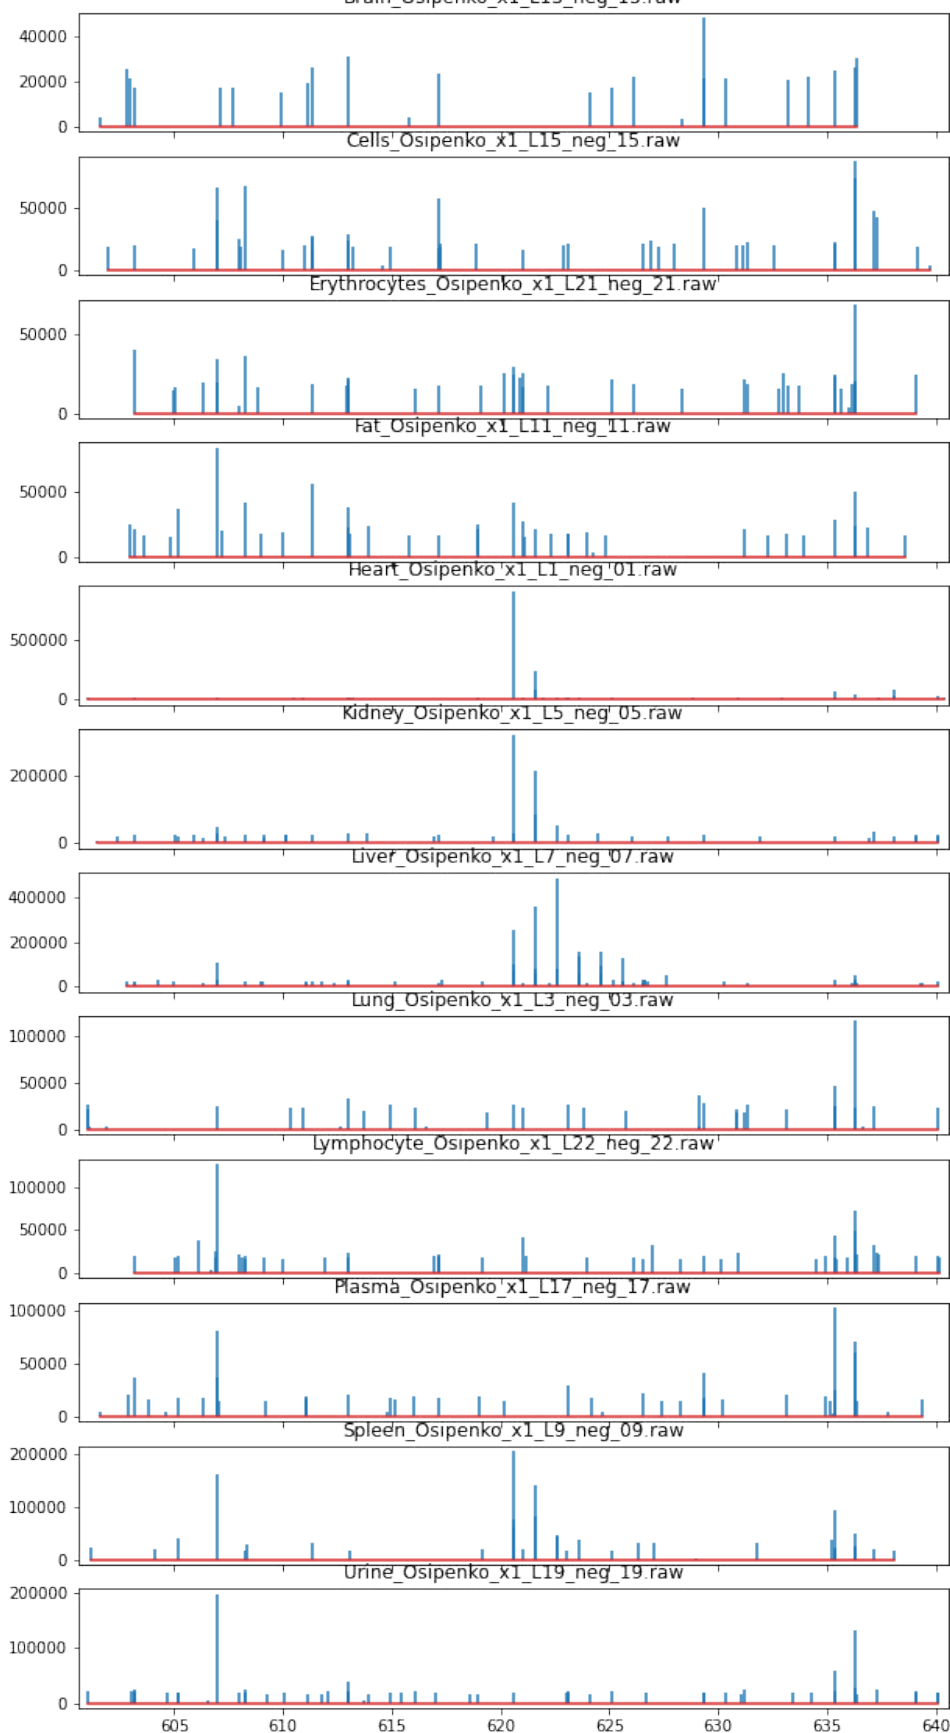

Supplement: s1 [file s1]
