# Supplementary figures and images for: Untargeted Lipidomics after D2O Administration Reveals the Turnover Rate of Individual Lipids in Various Organs of Living Organisms
Source: MDPI journal article supplement (doi:10.3390/ijms241411725), 2023-07-21

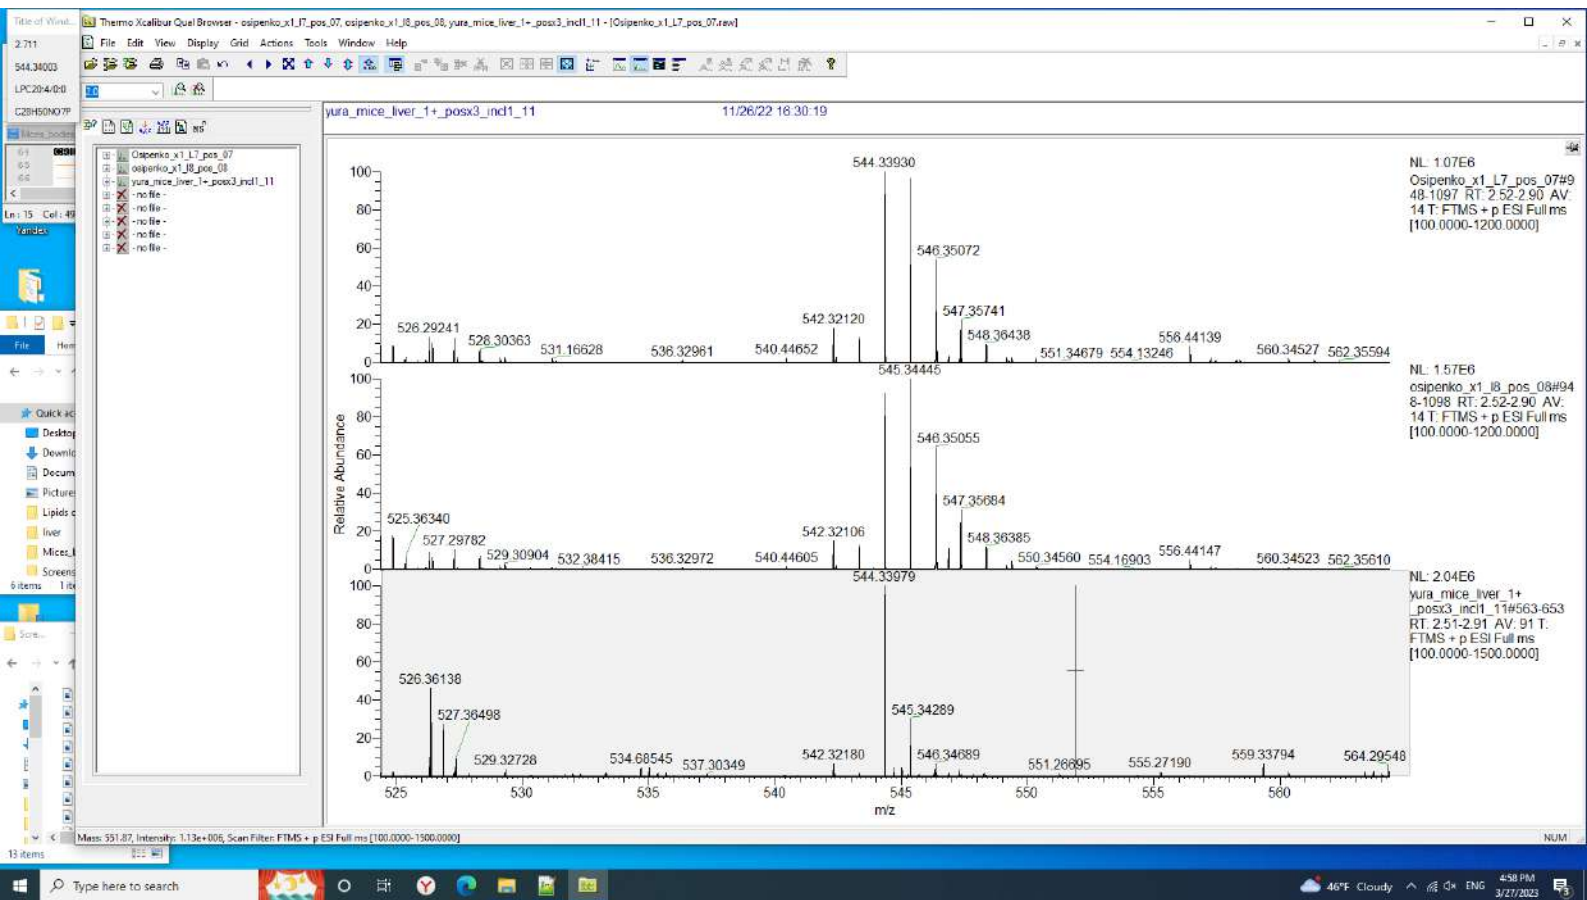

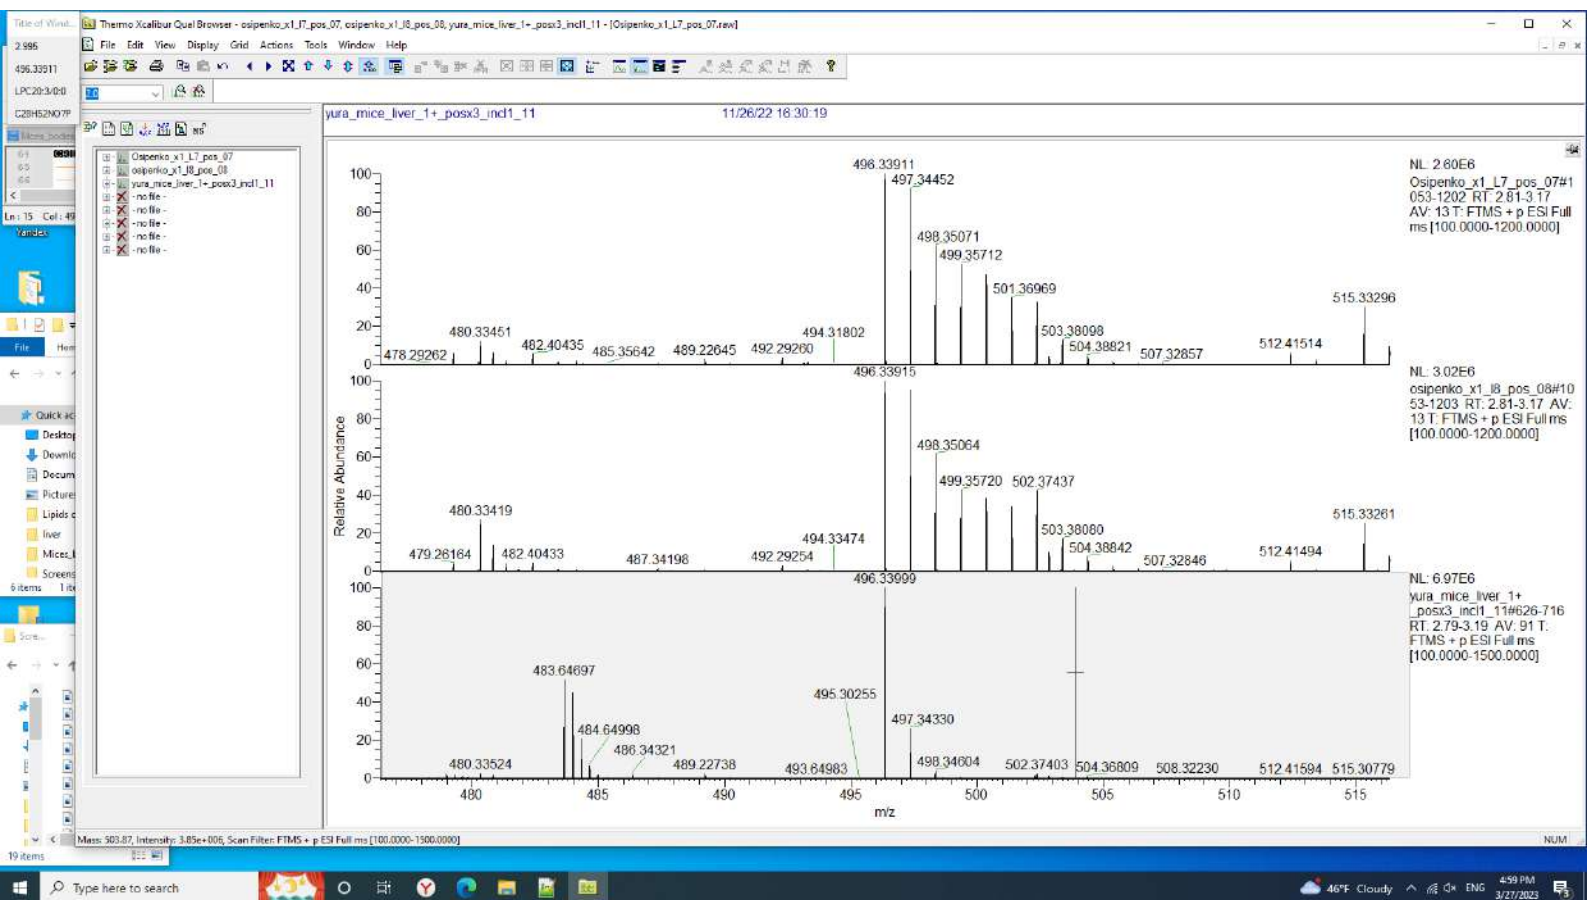

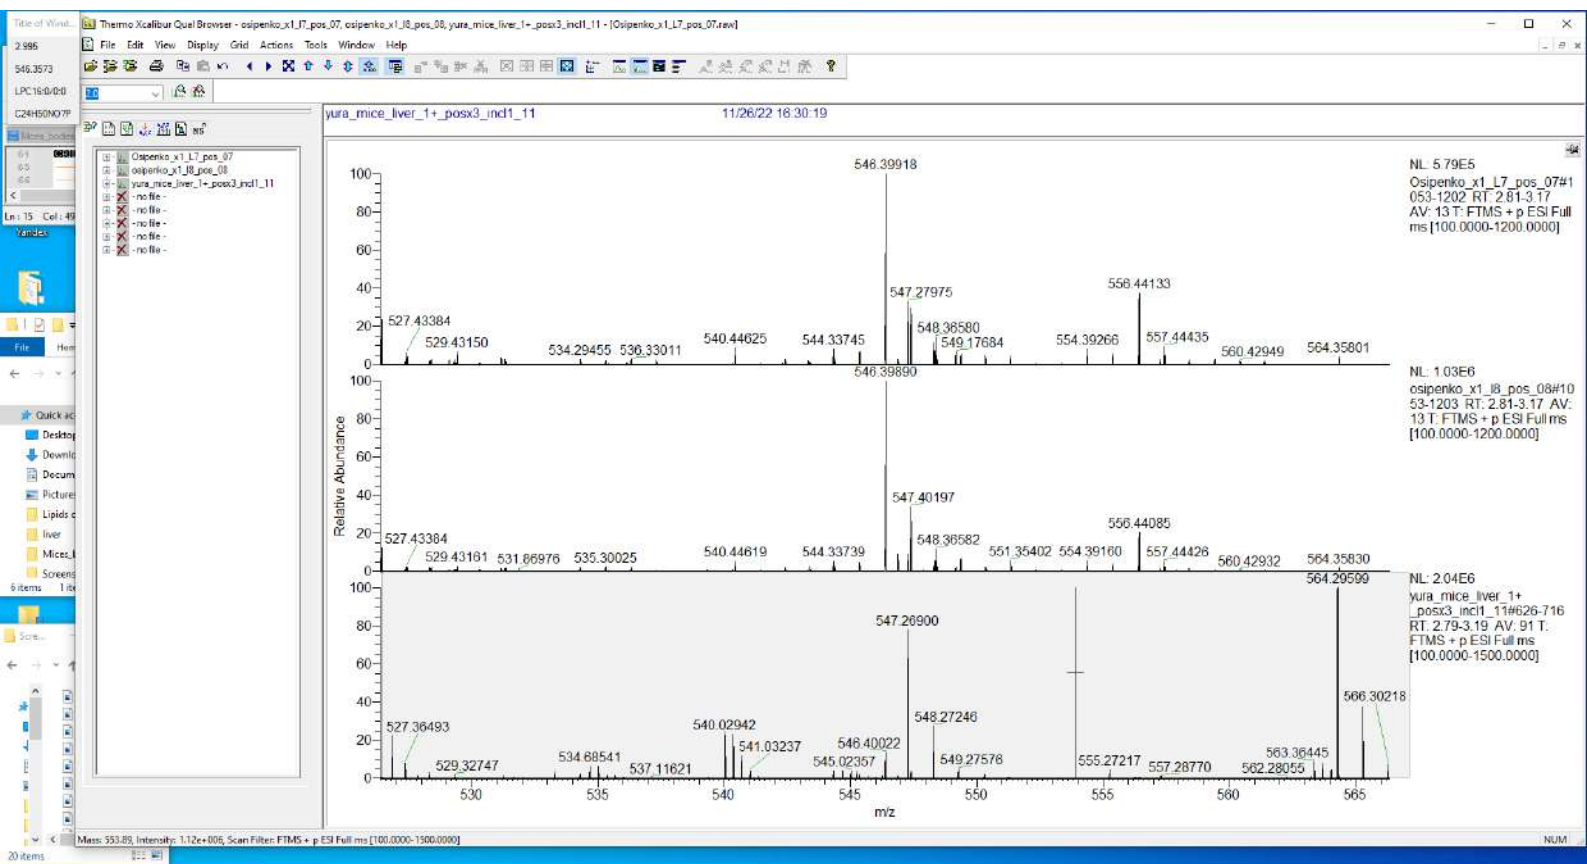

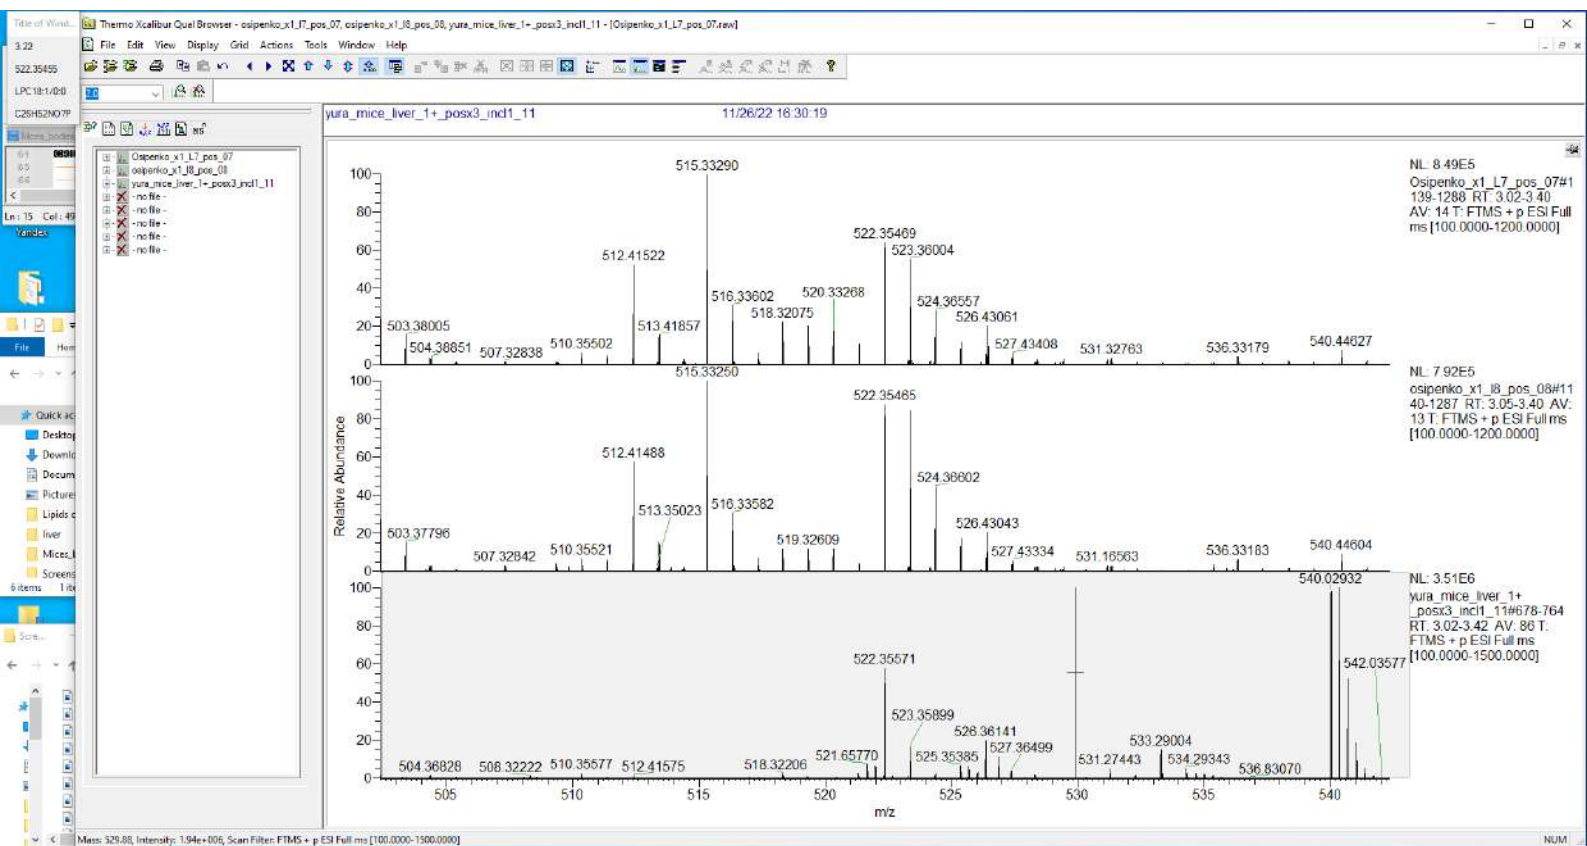



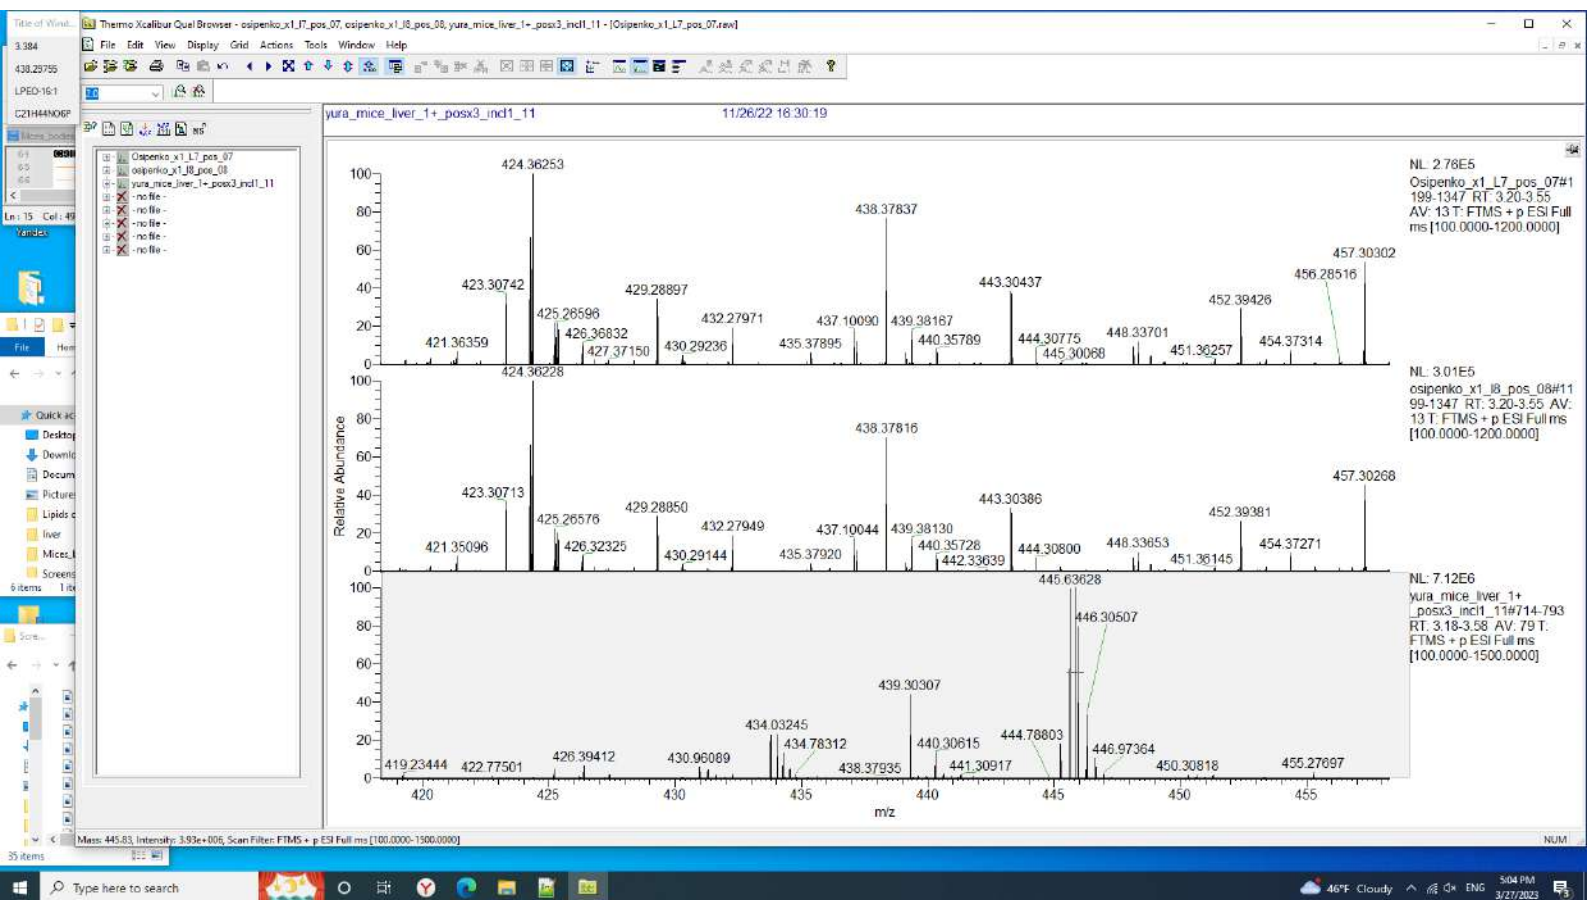

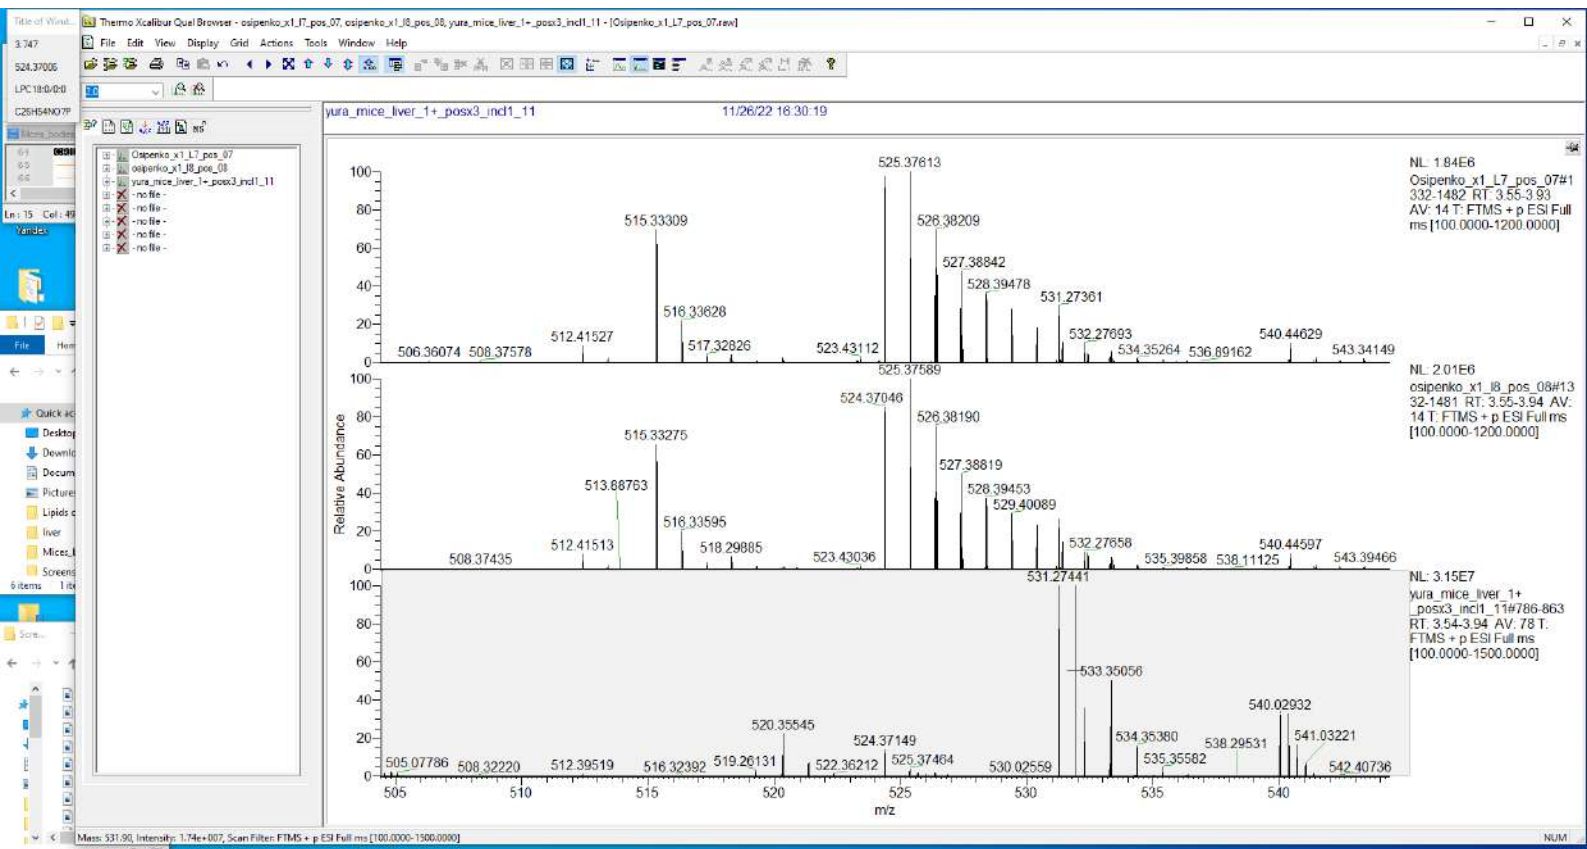

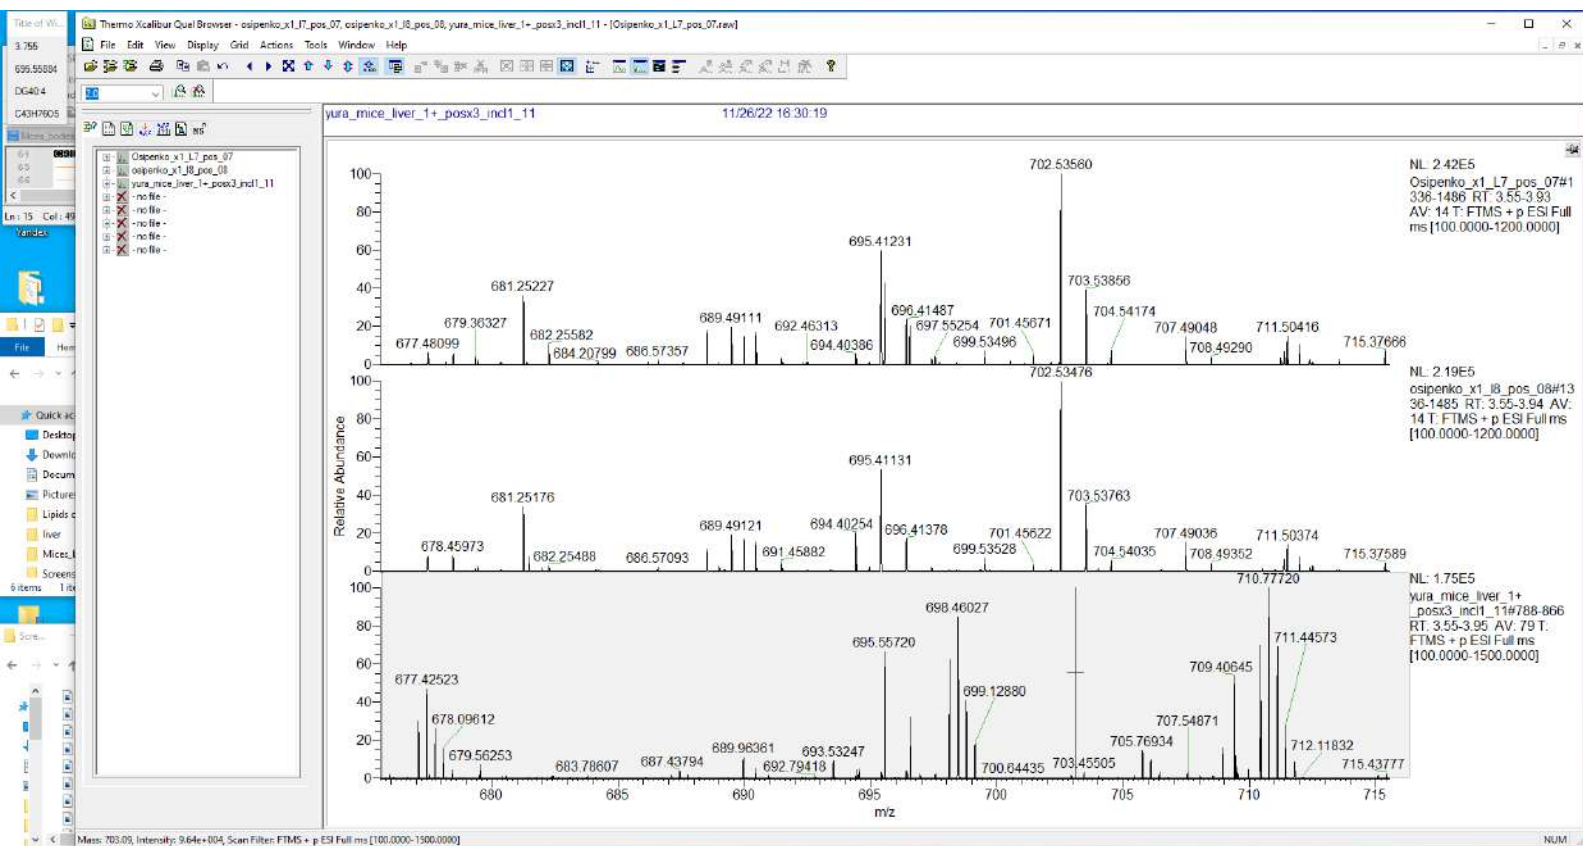

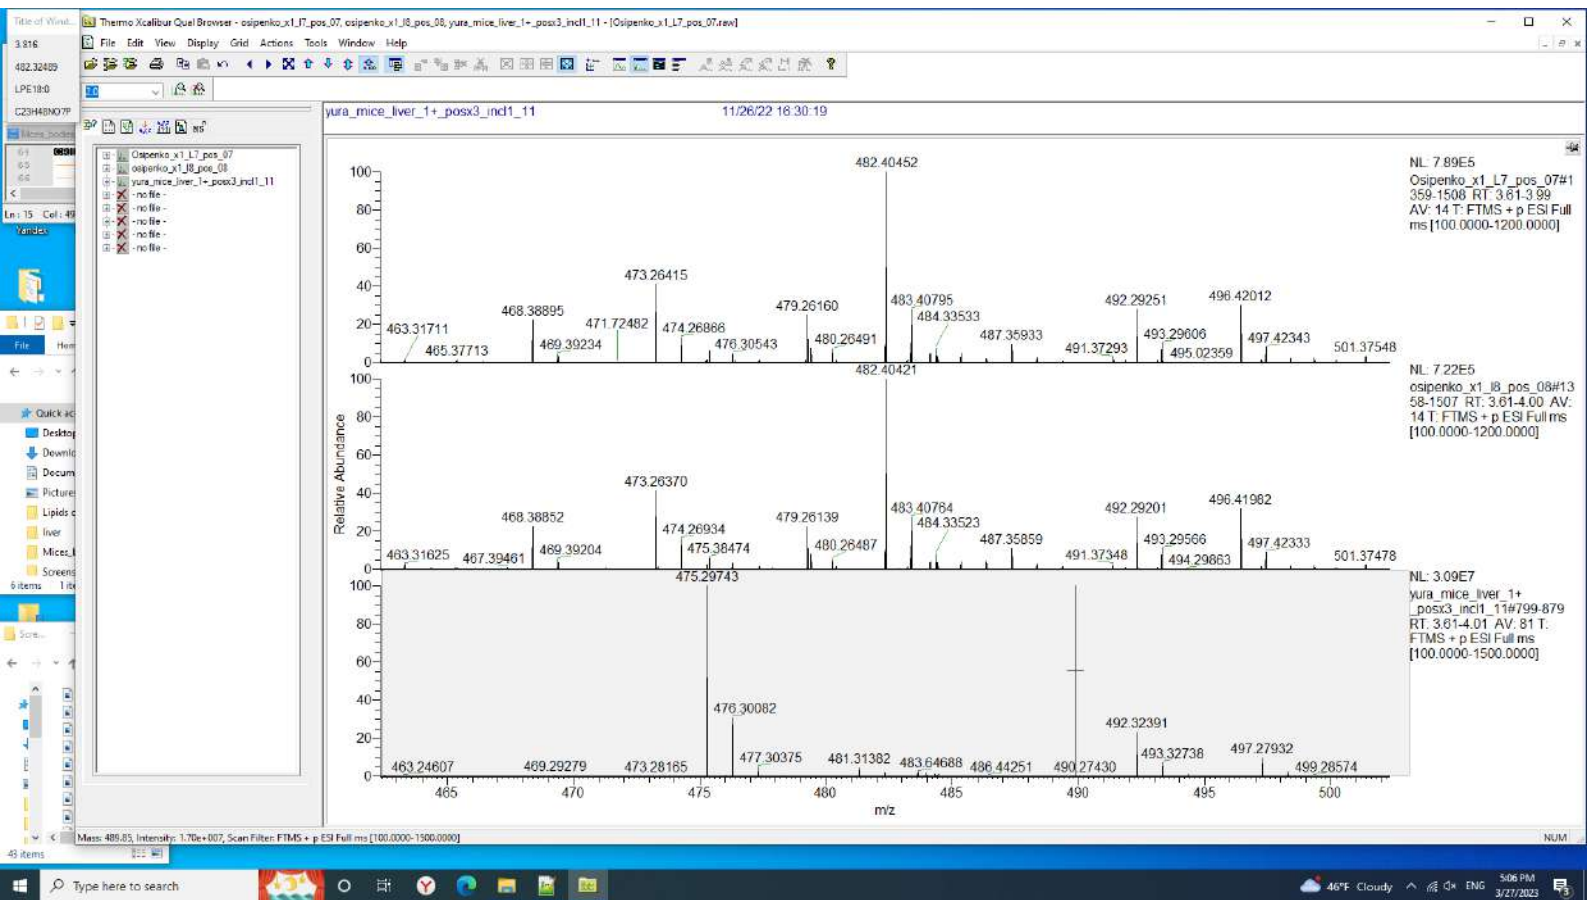

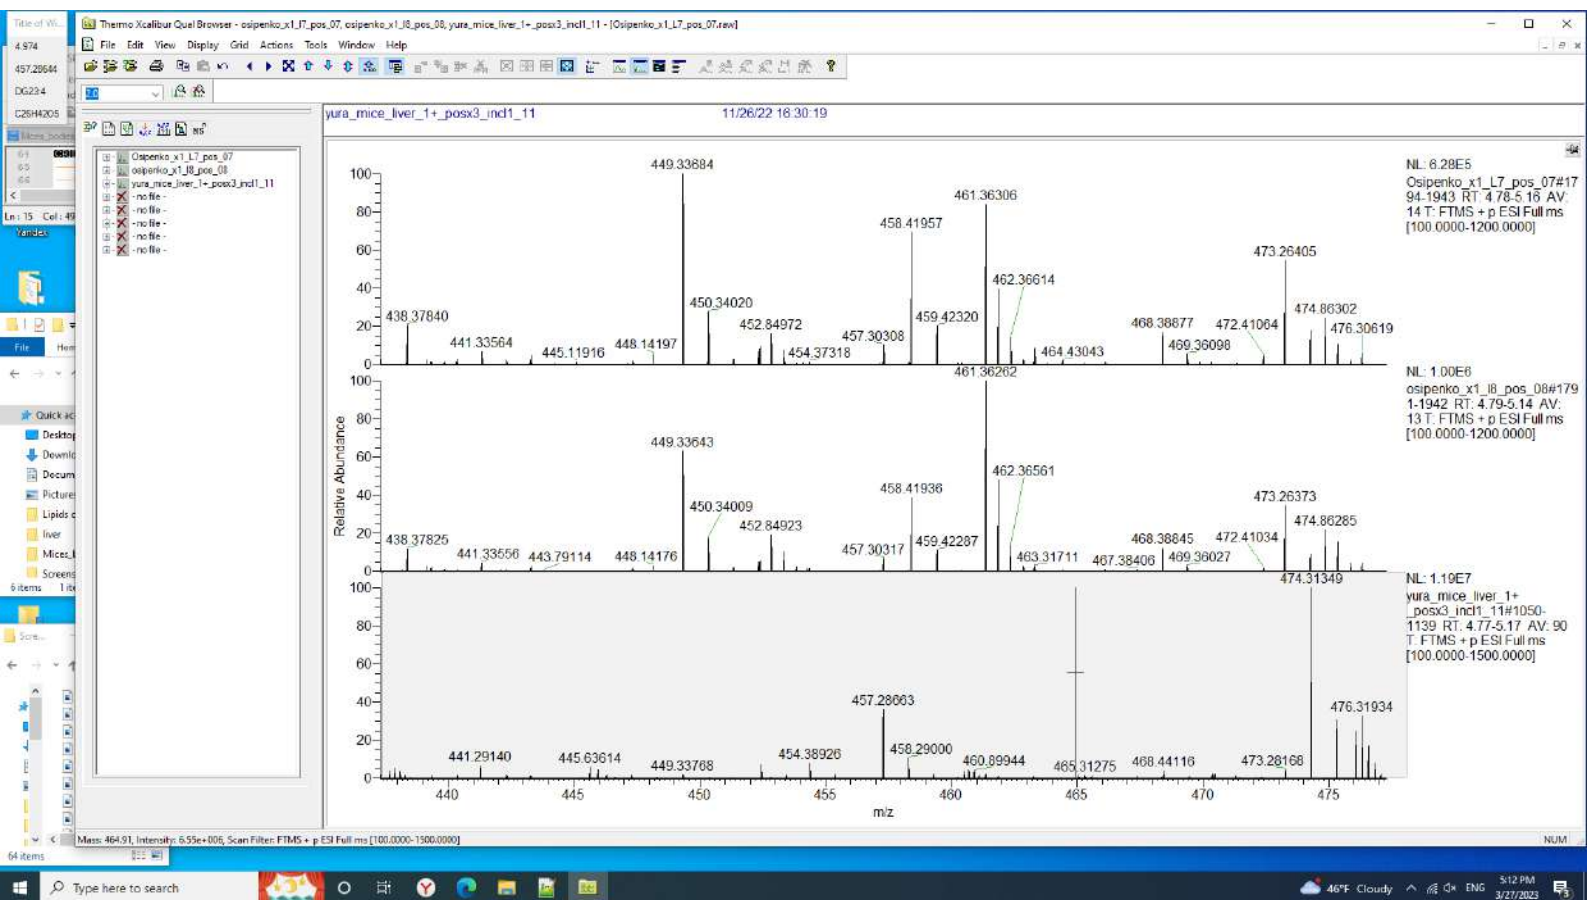



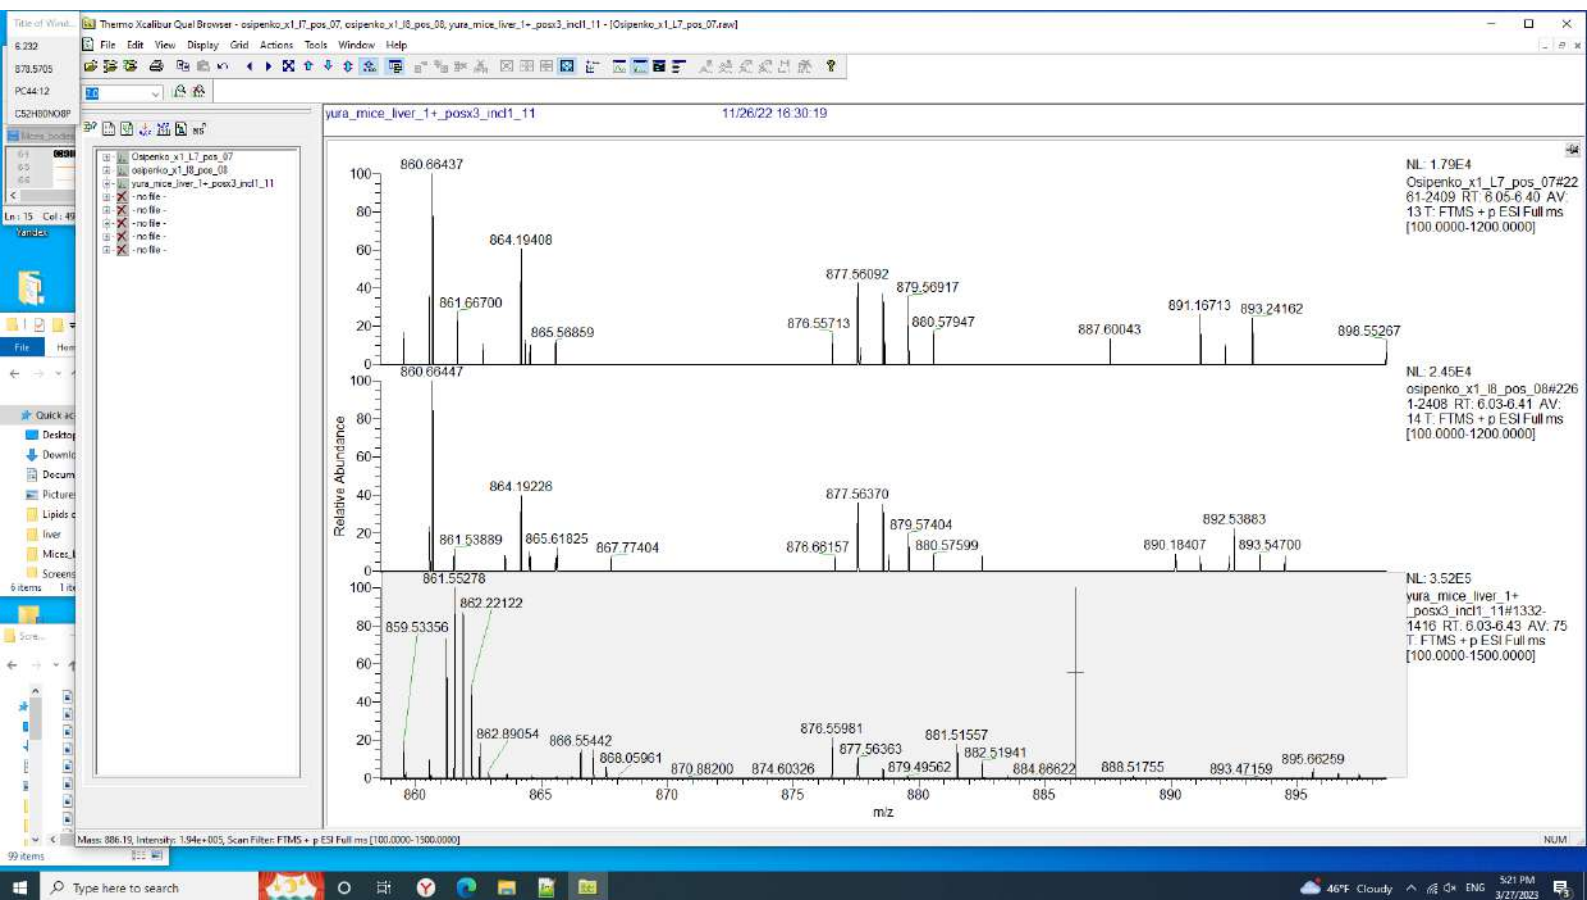



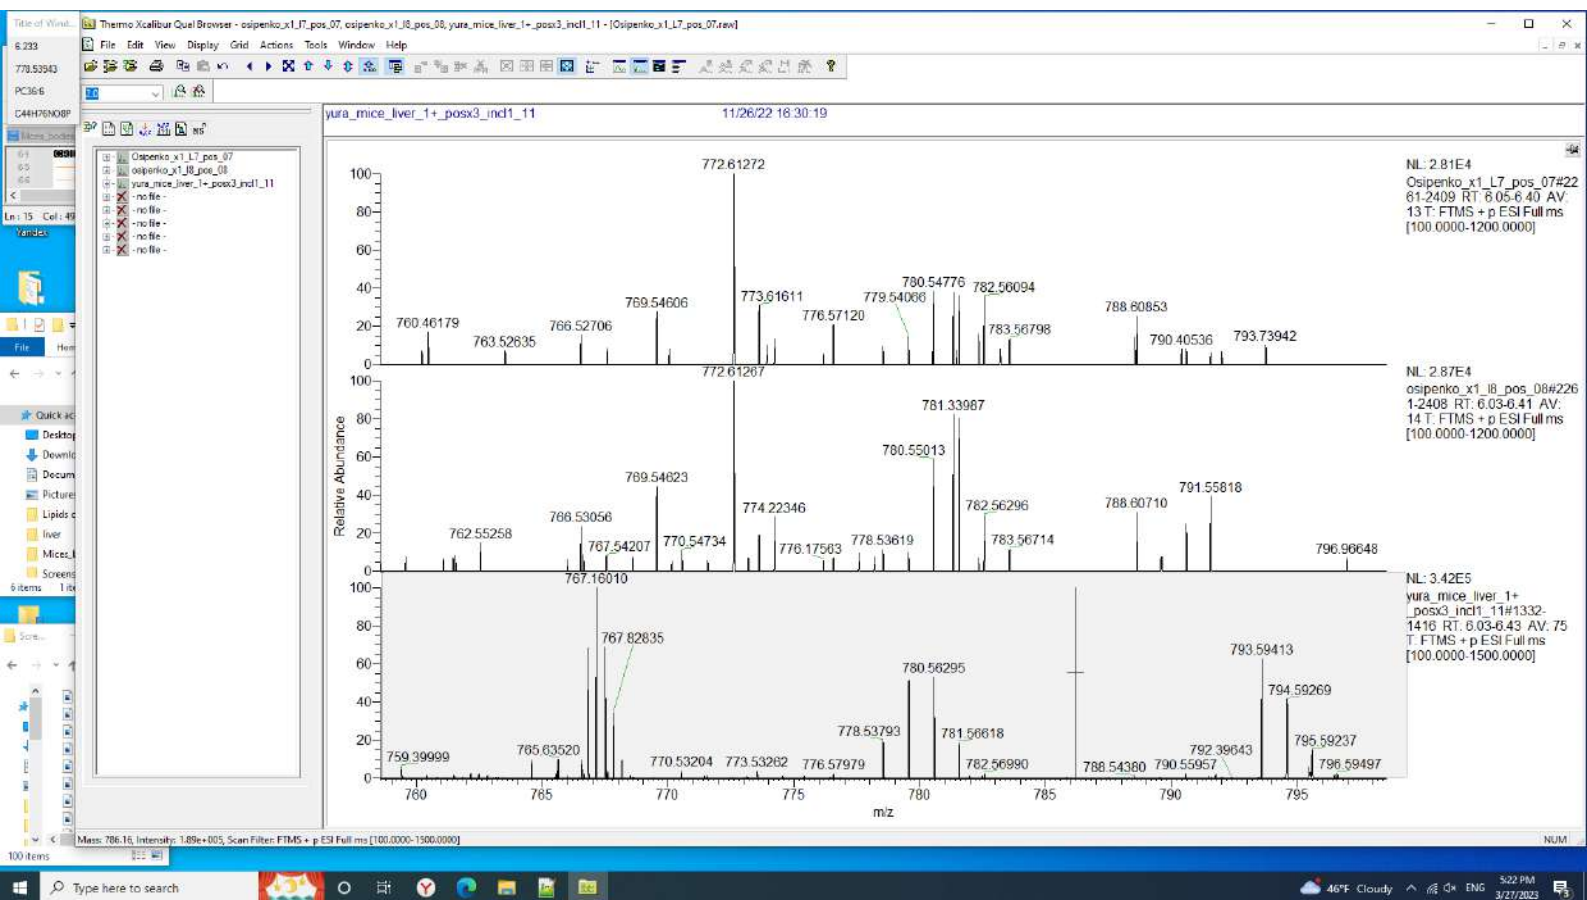

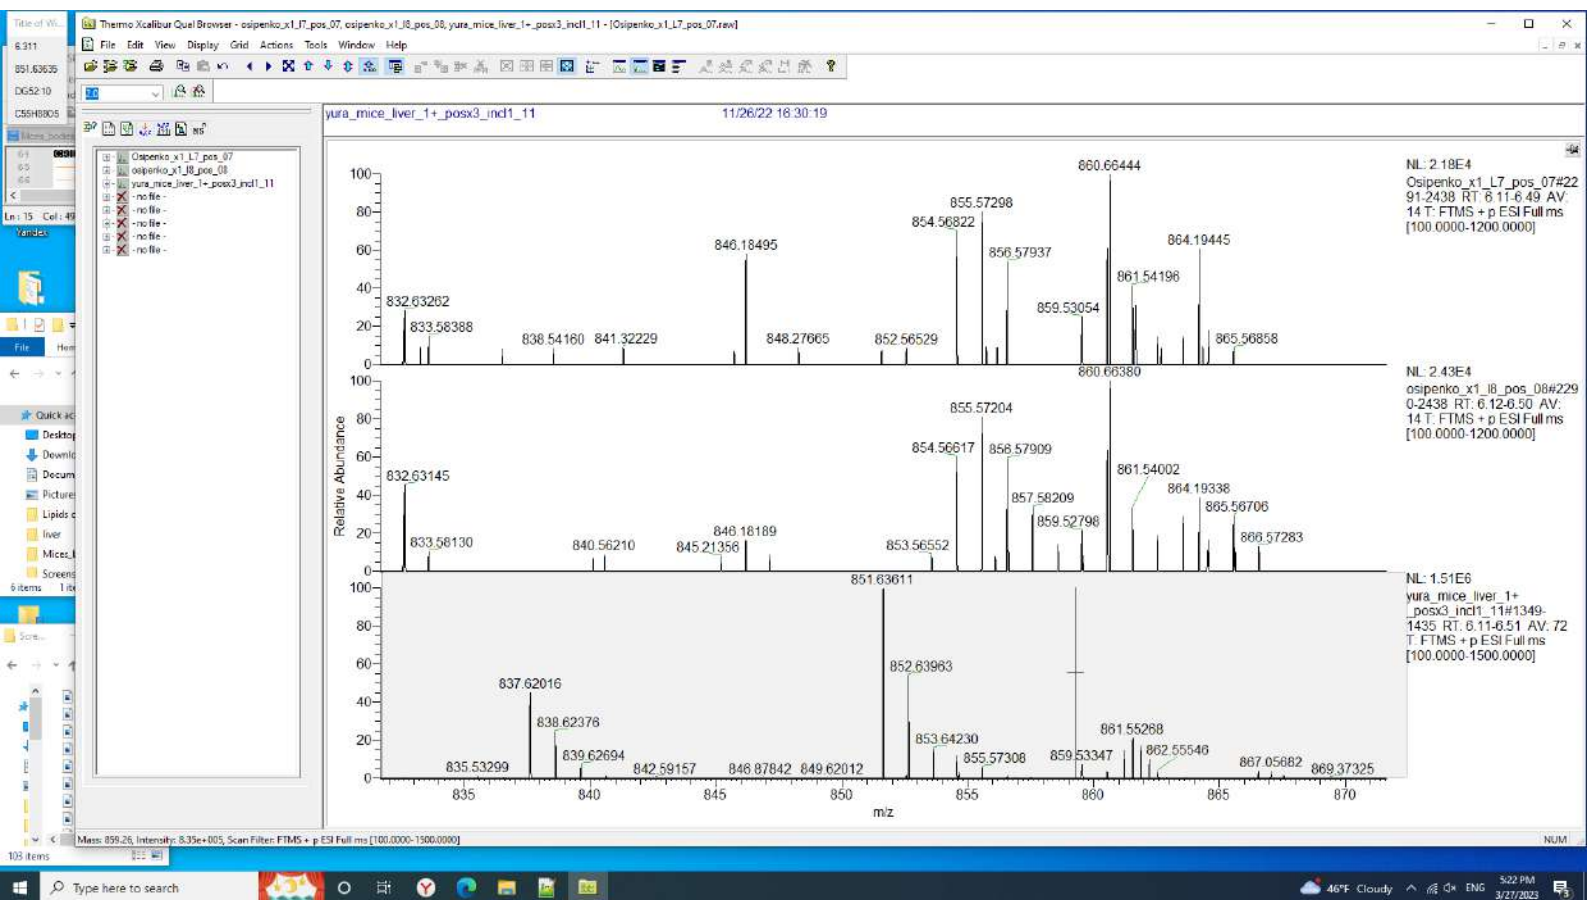

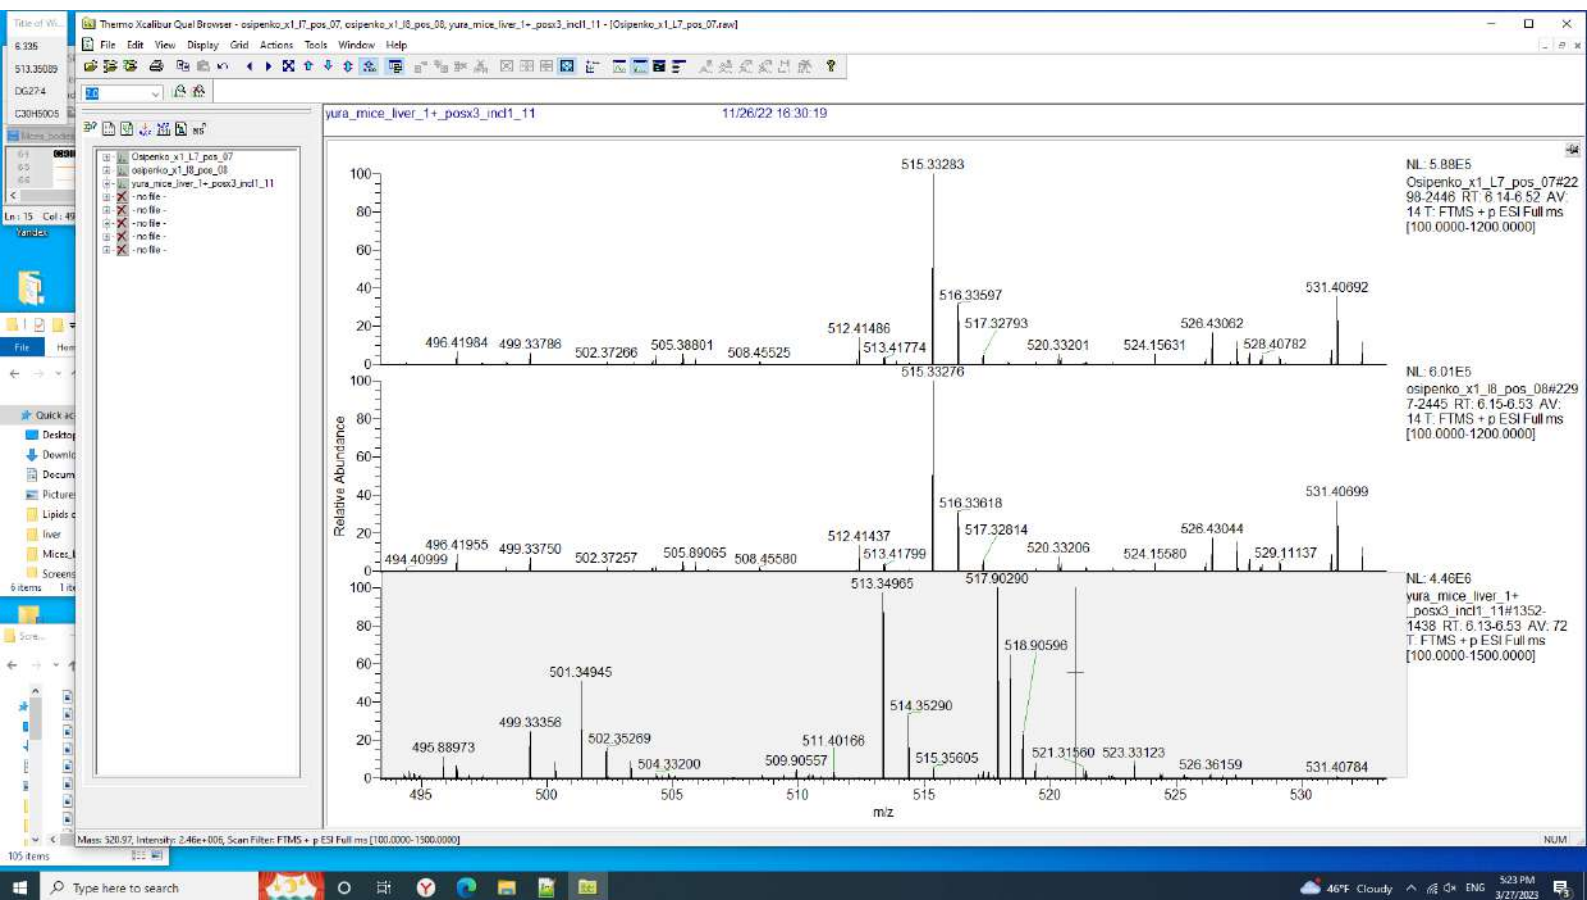

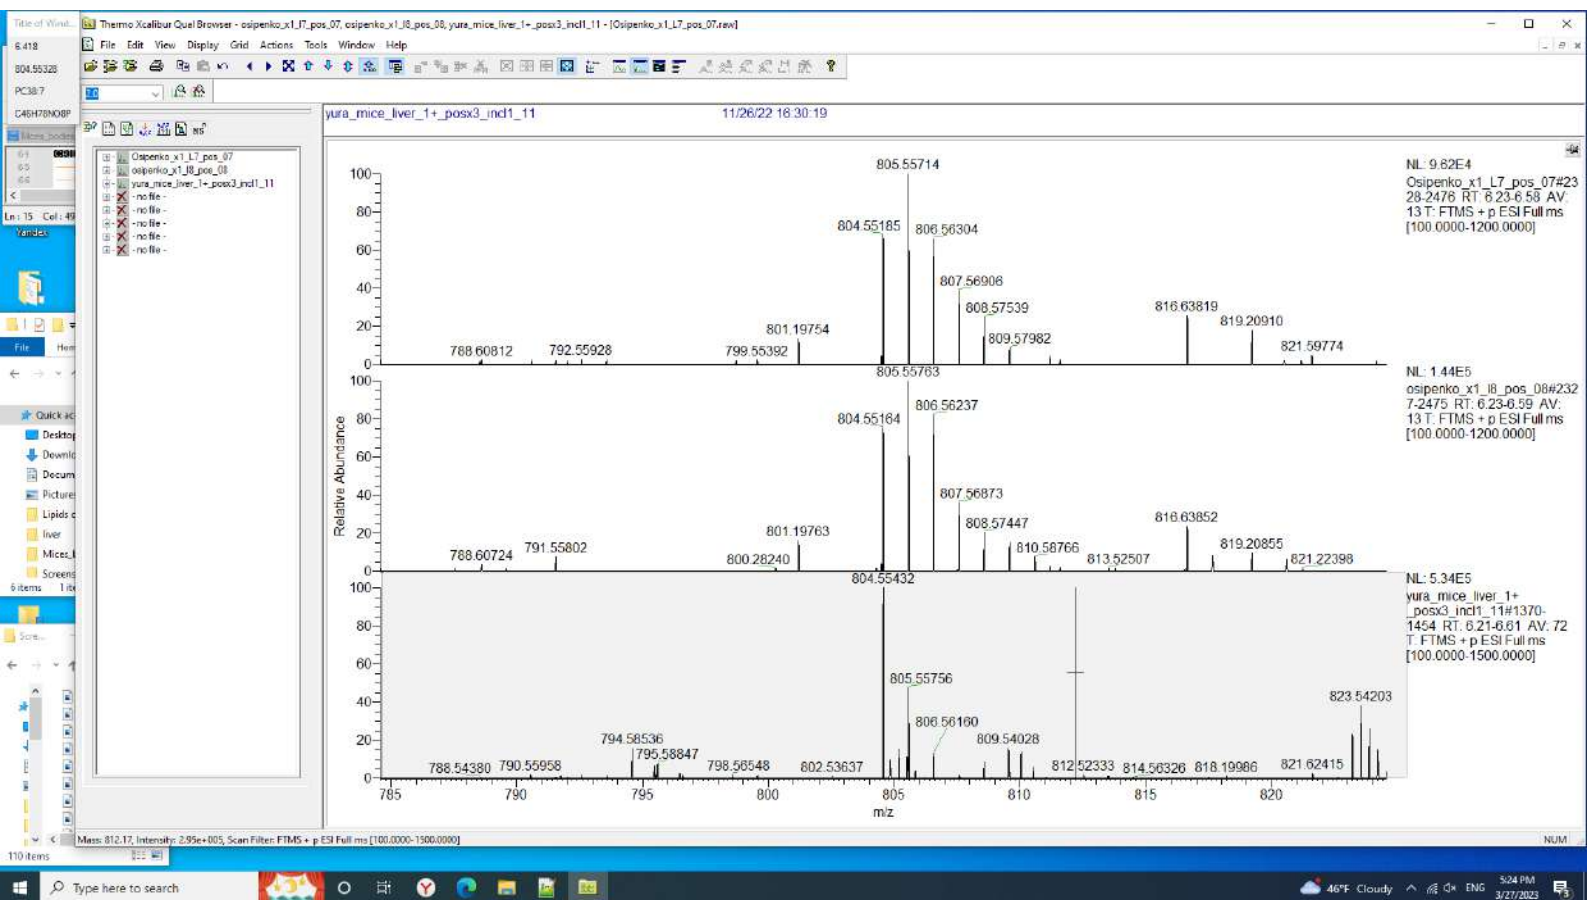

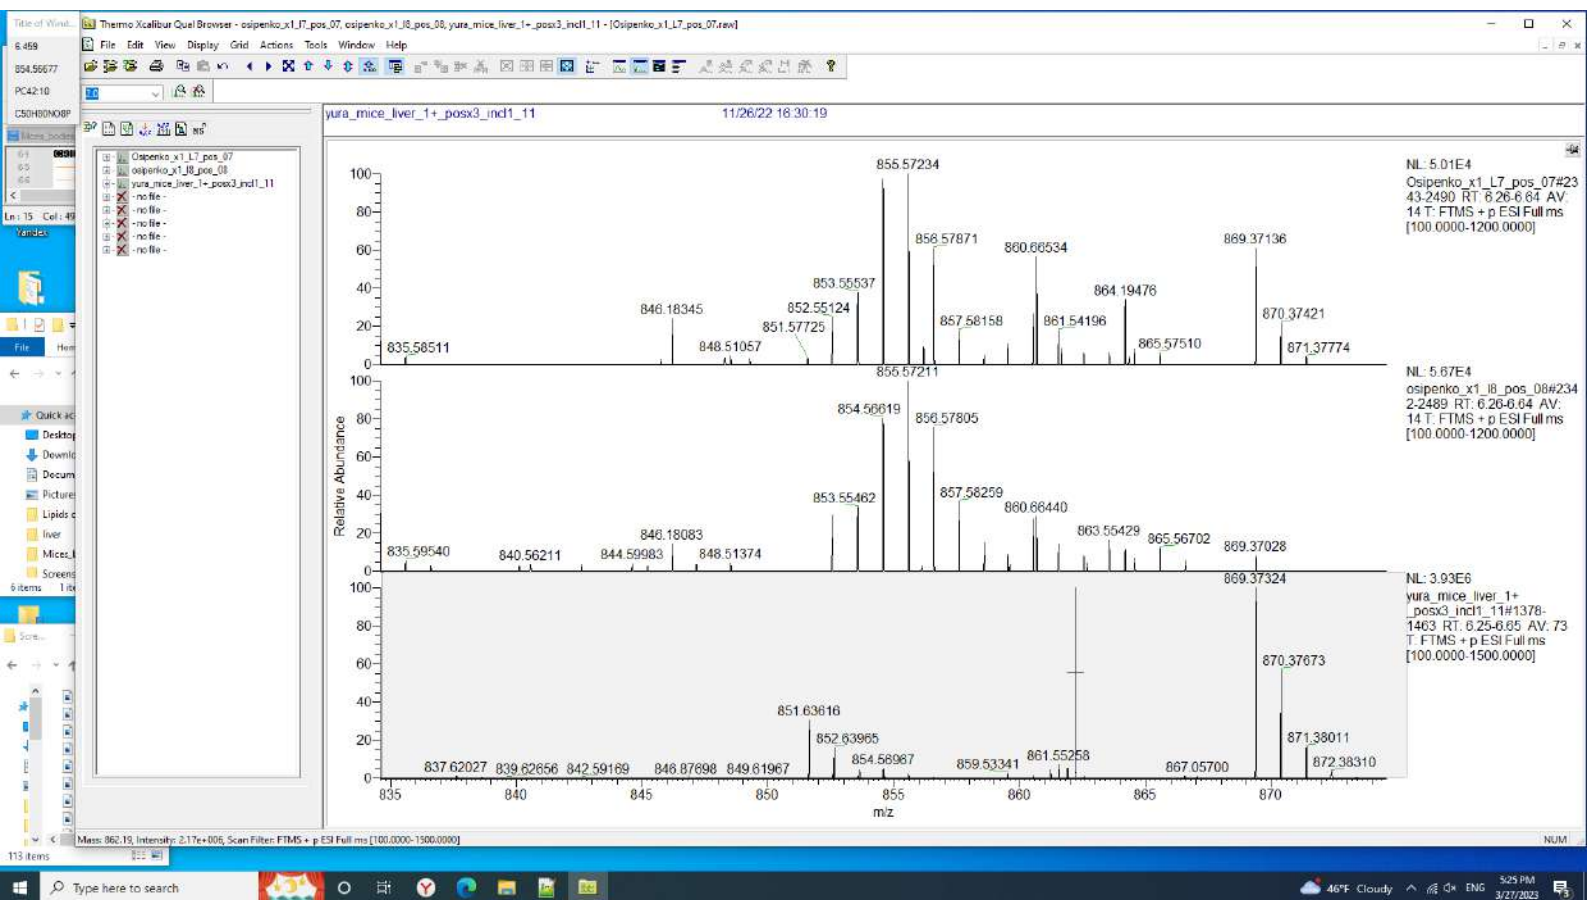

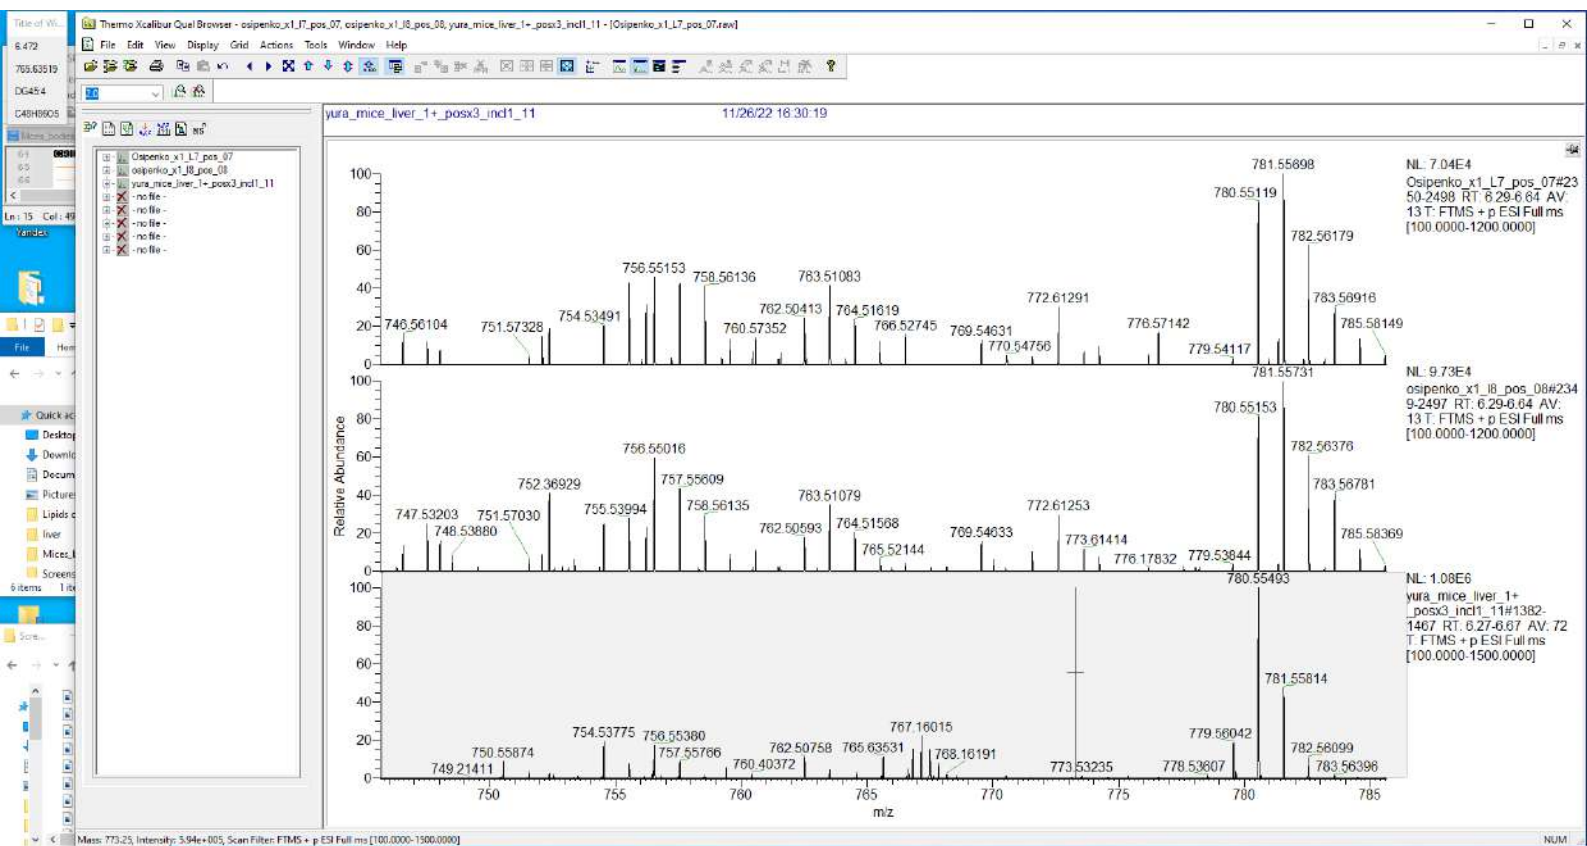



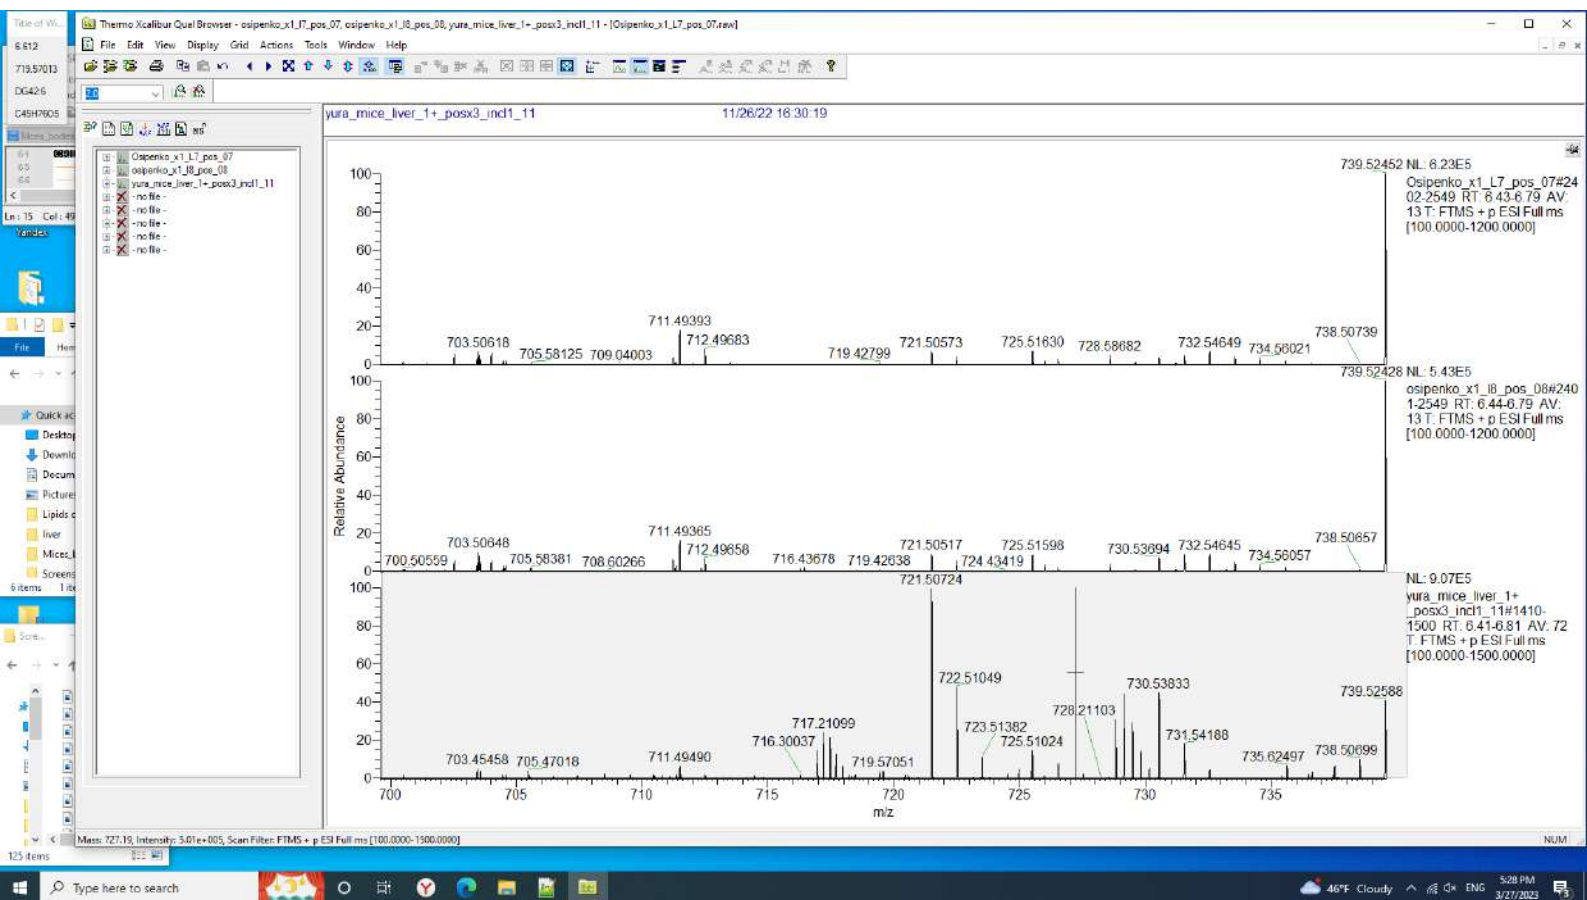

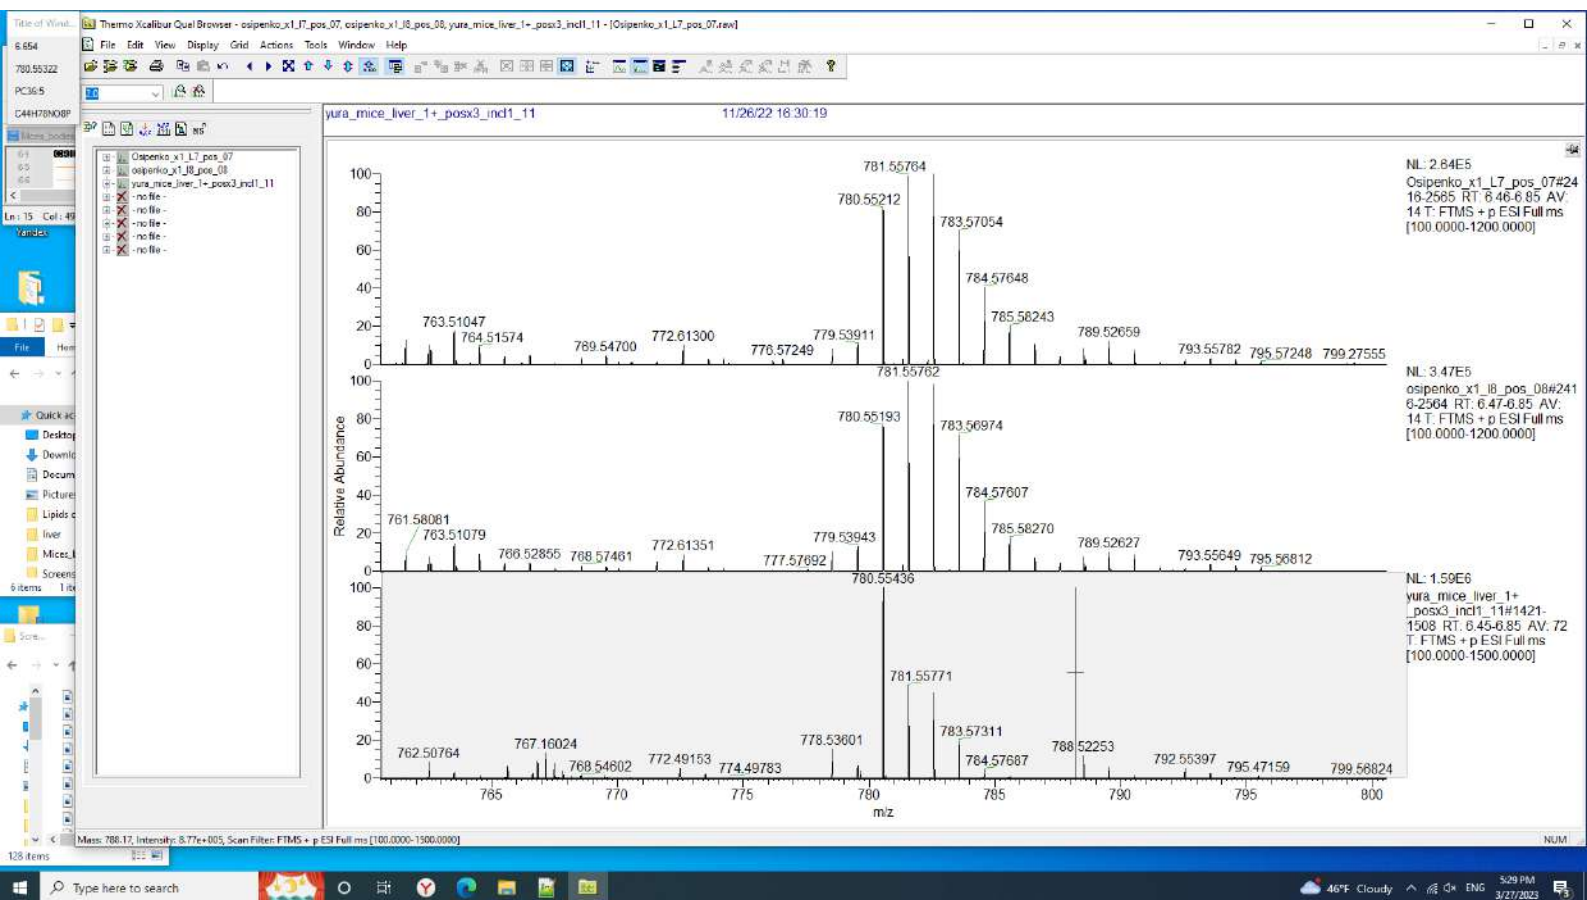

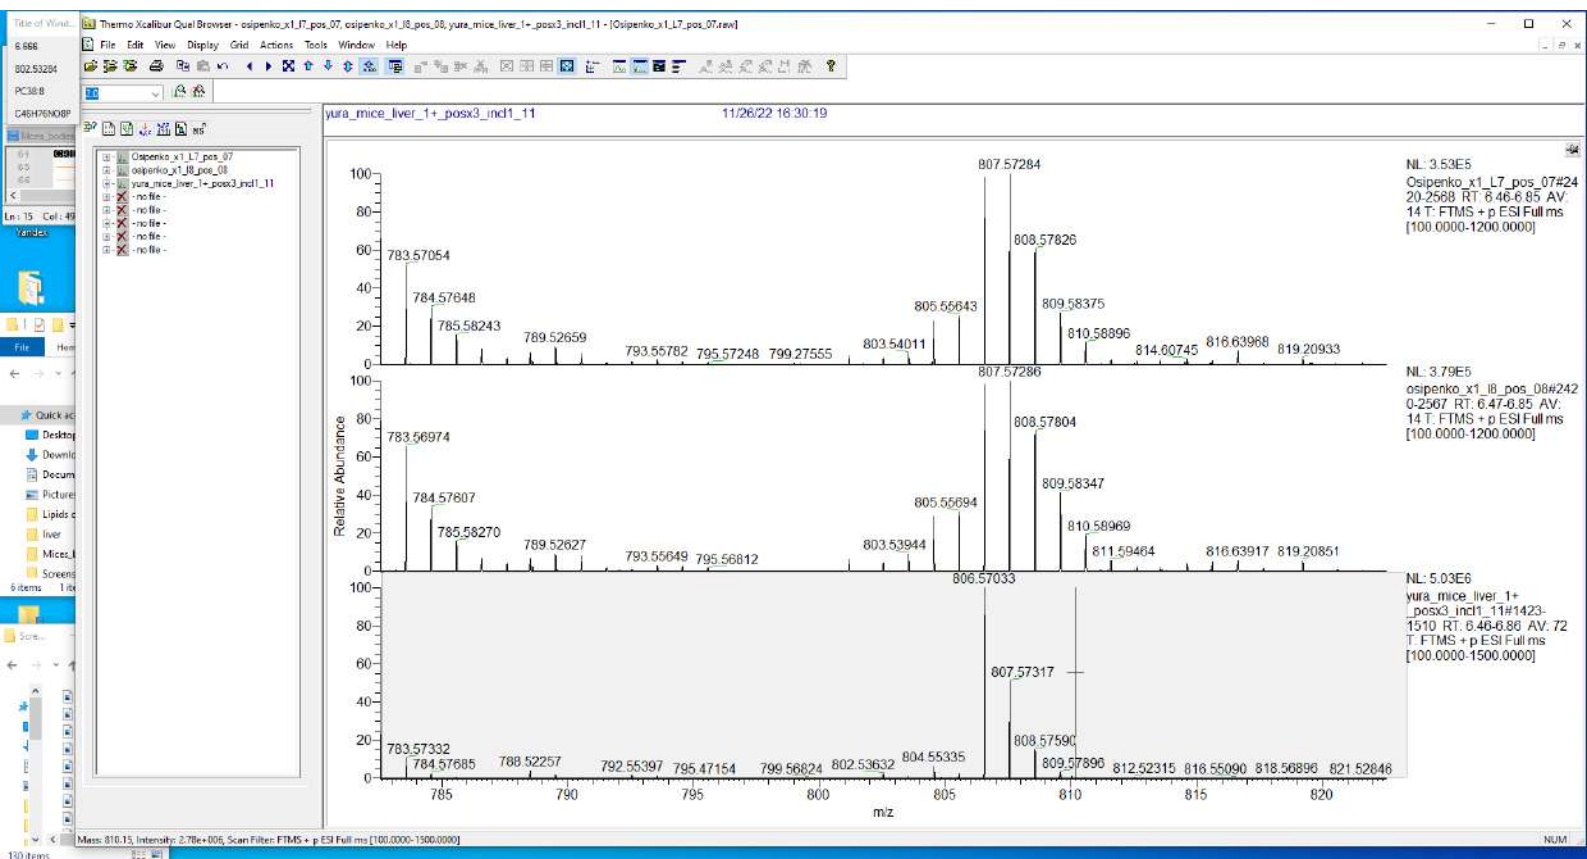

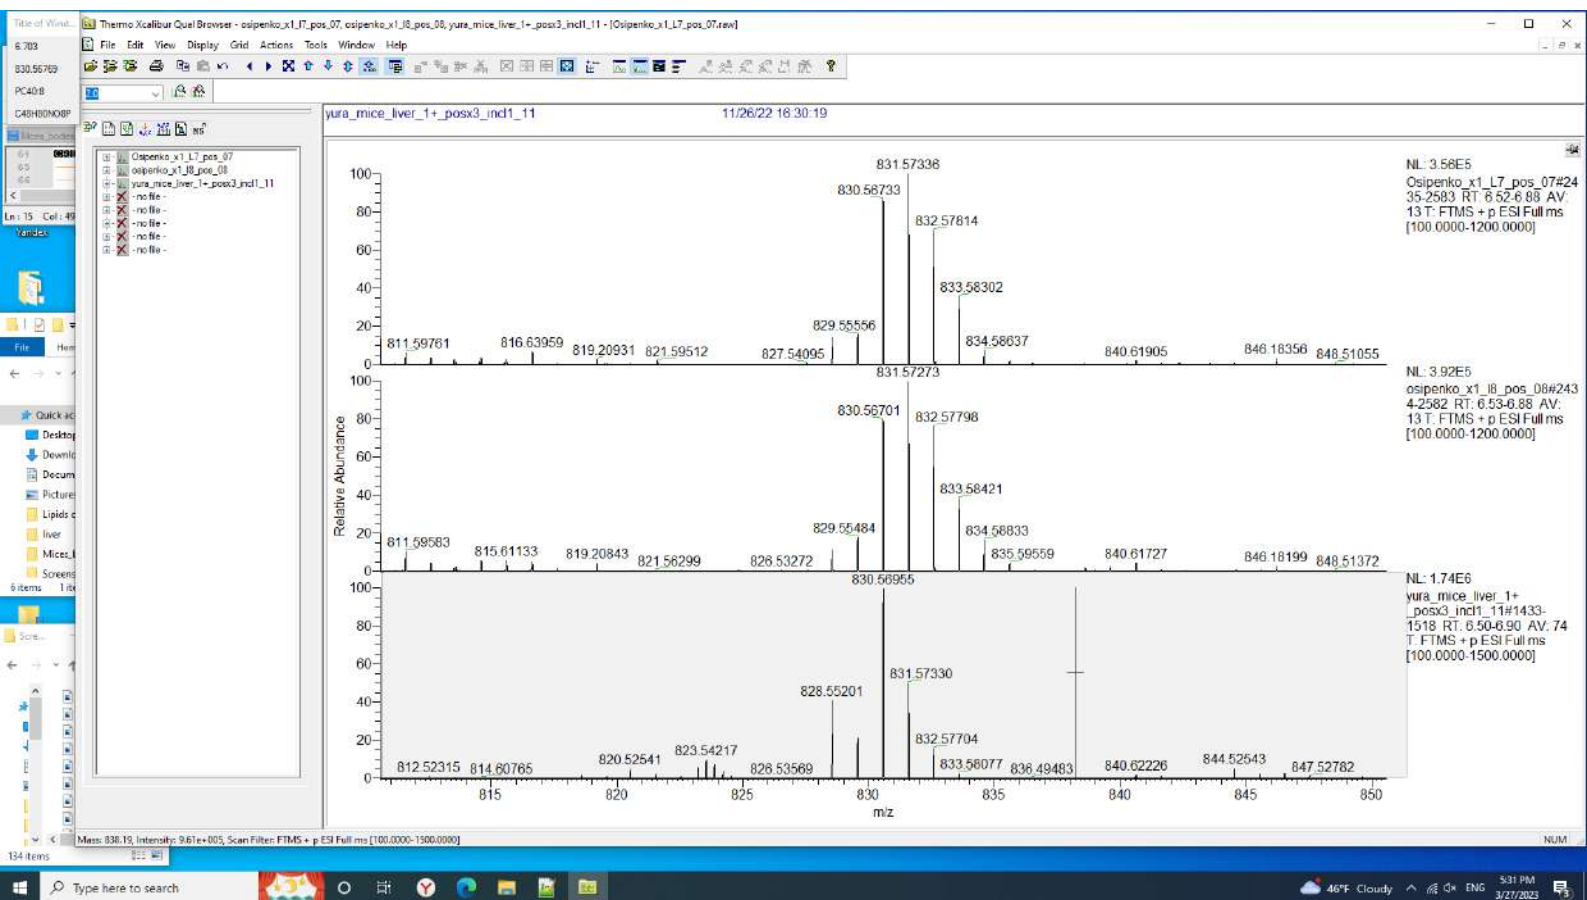

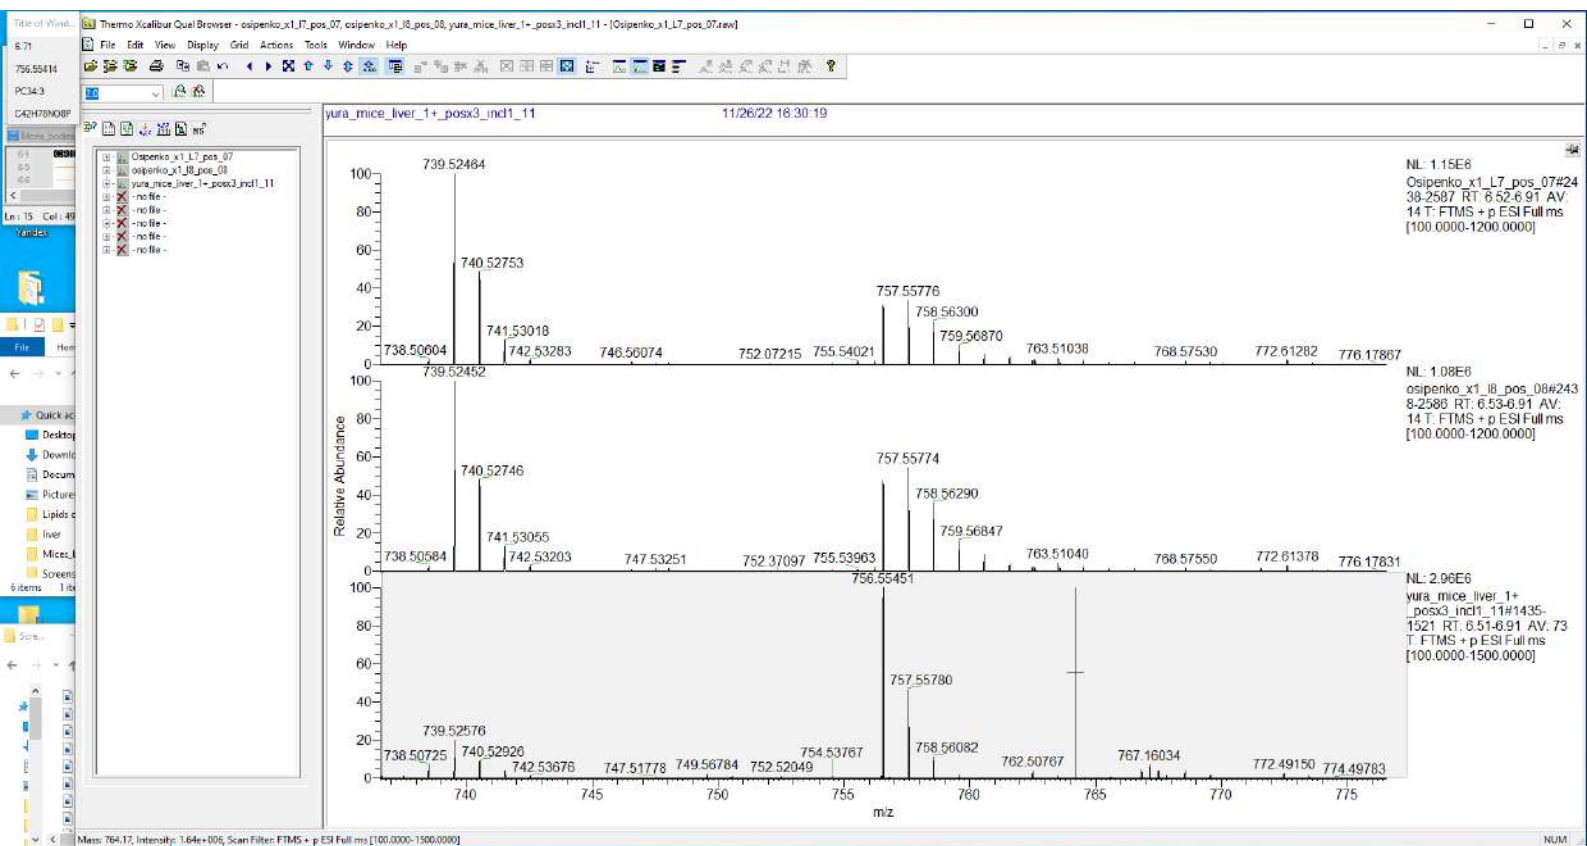

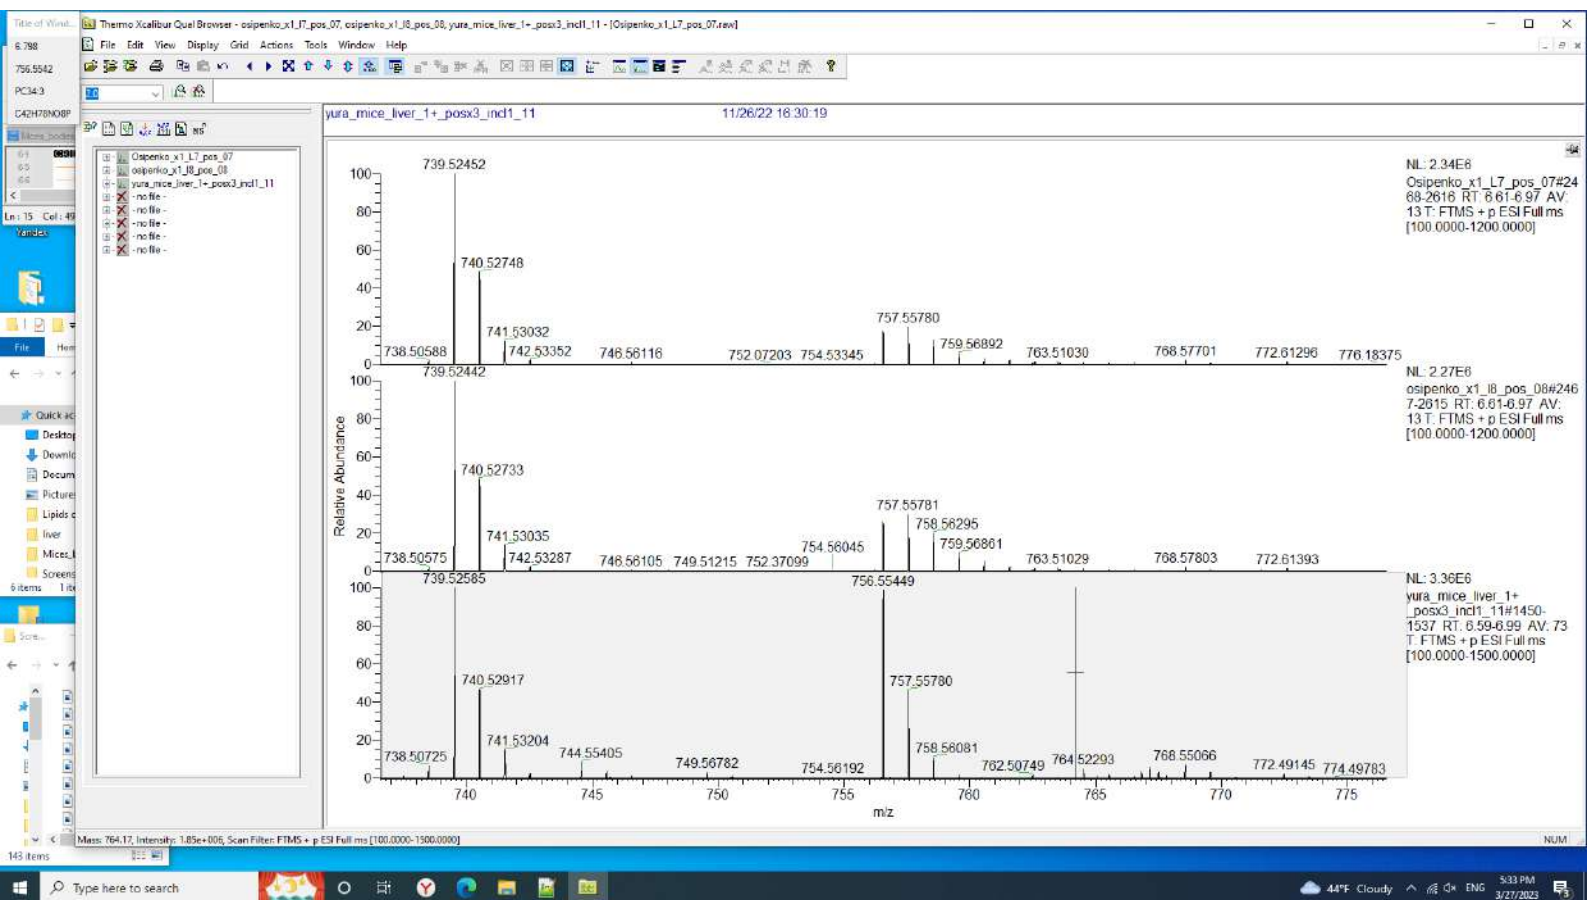



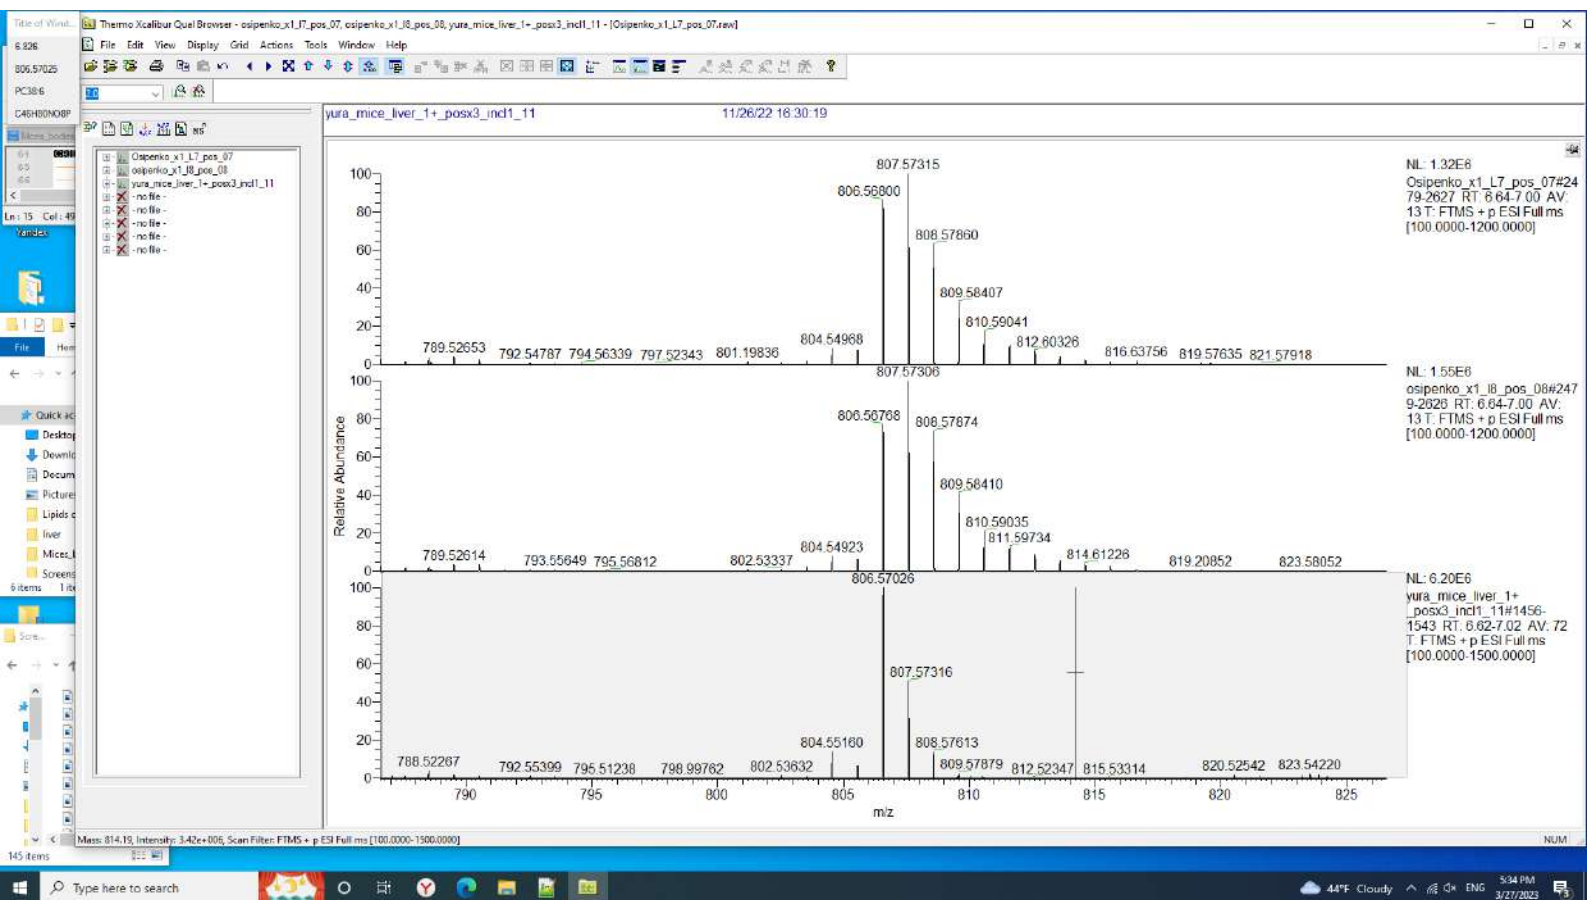

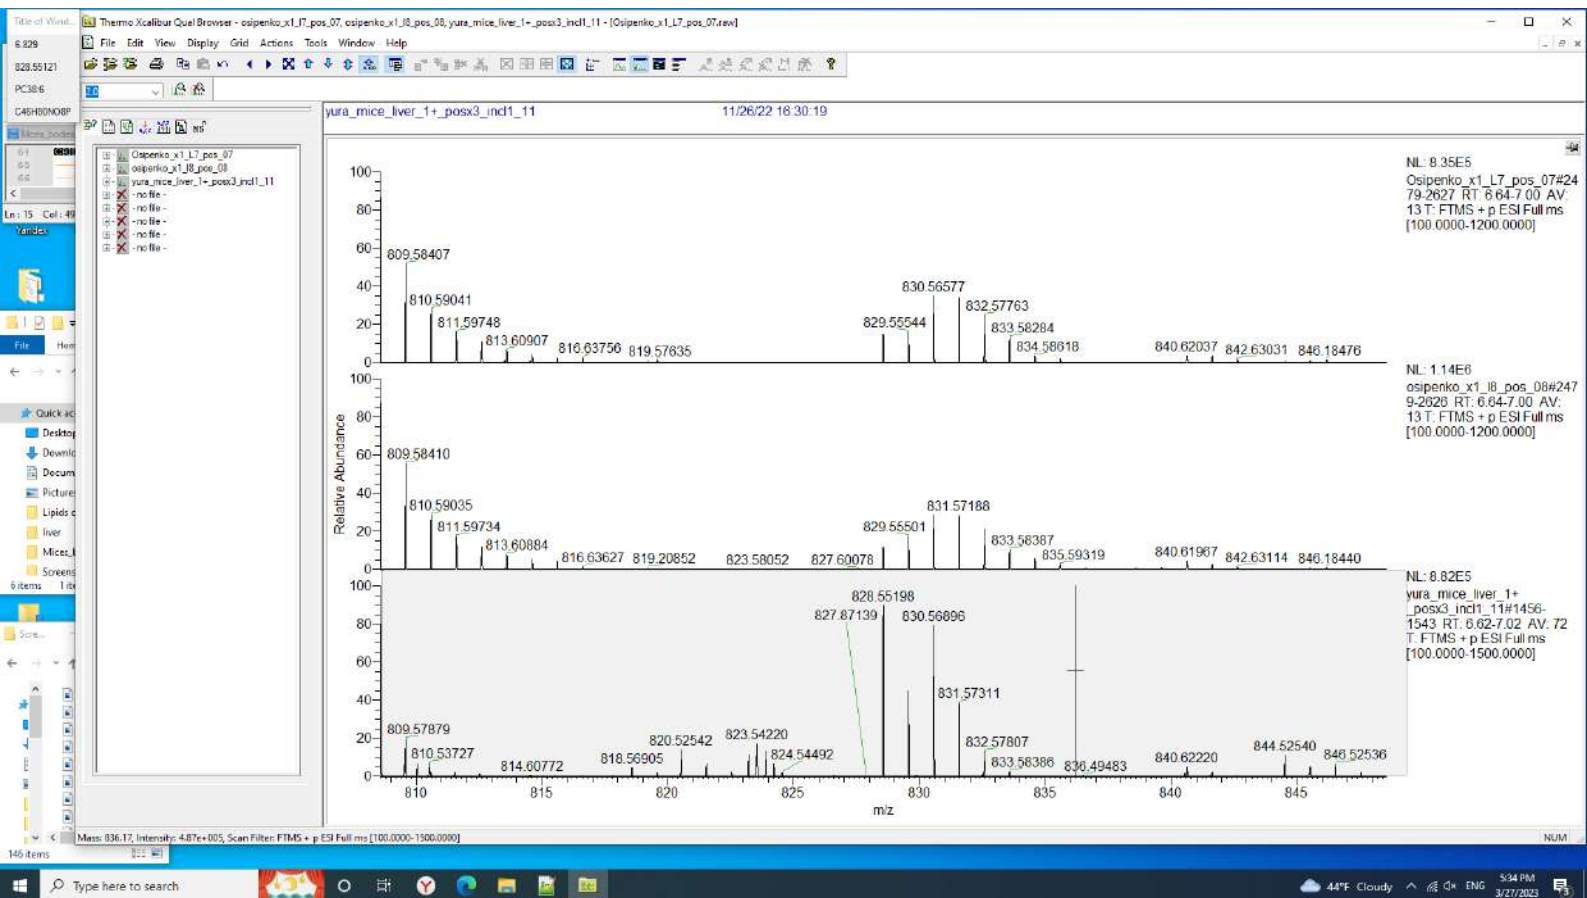

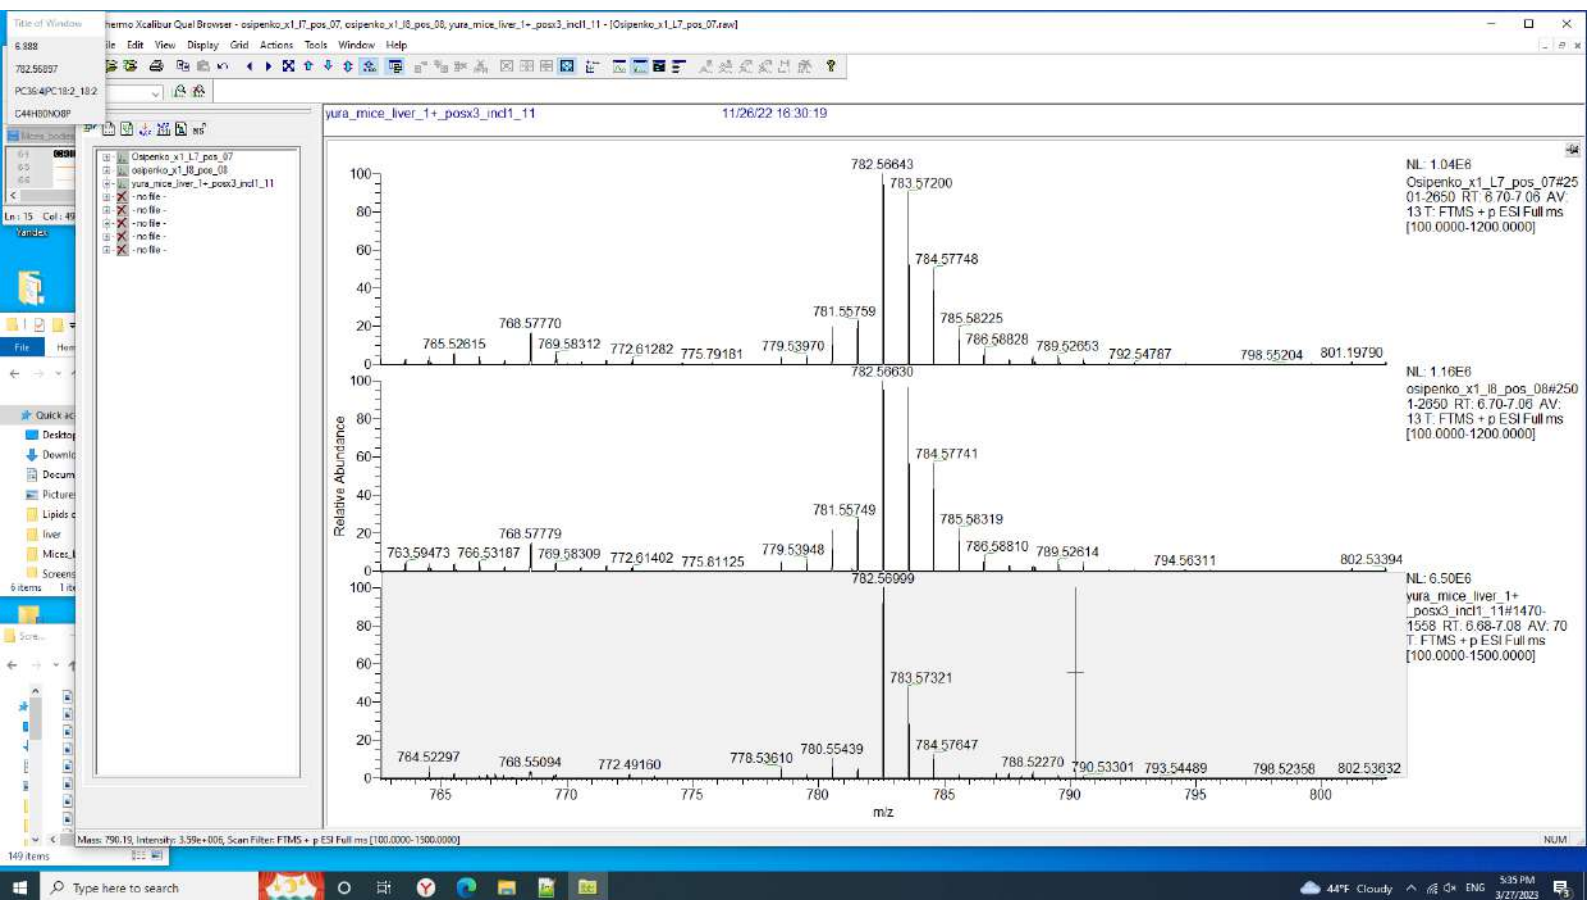

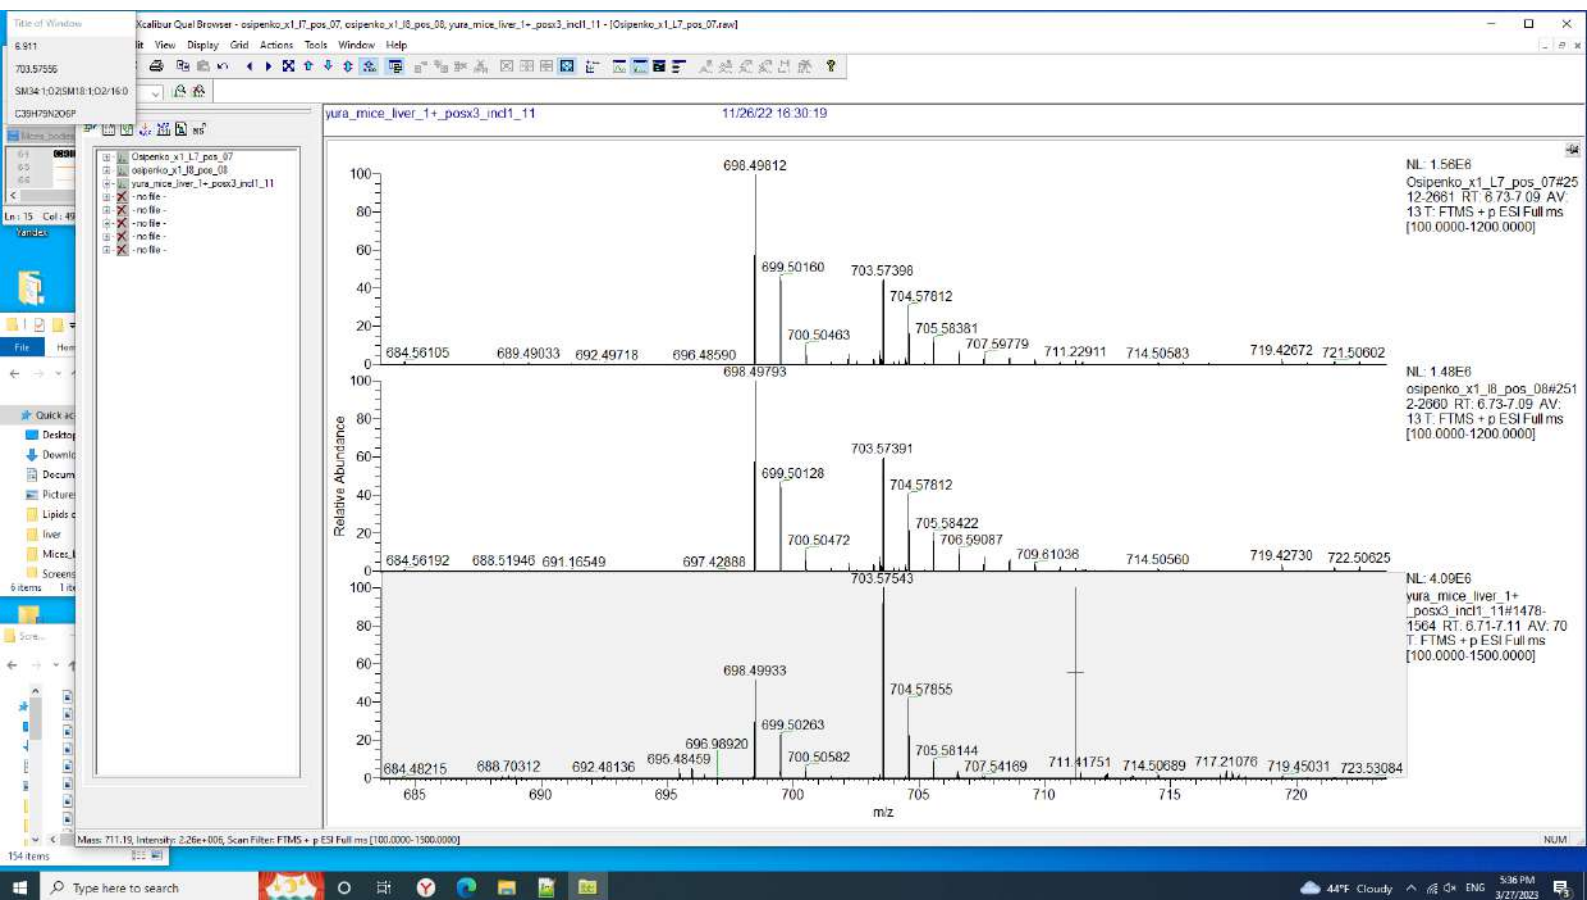

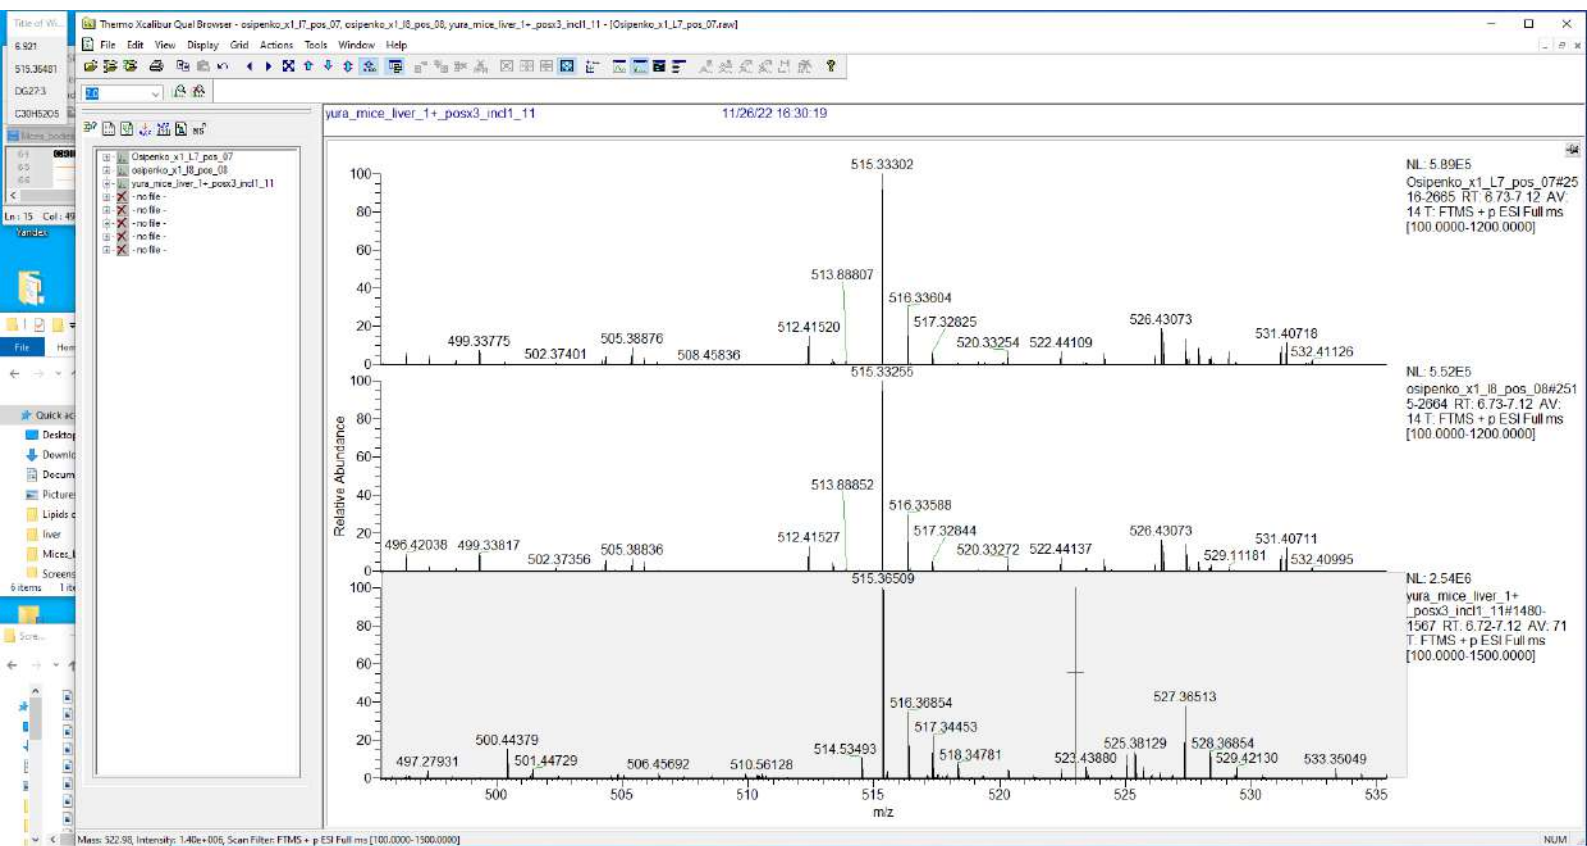

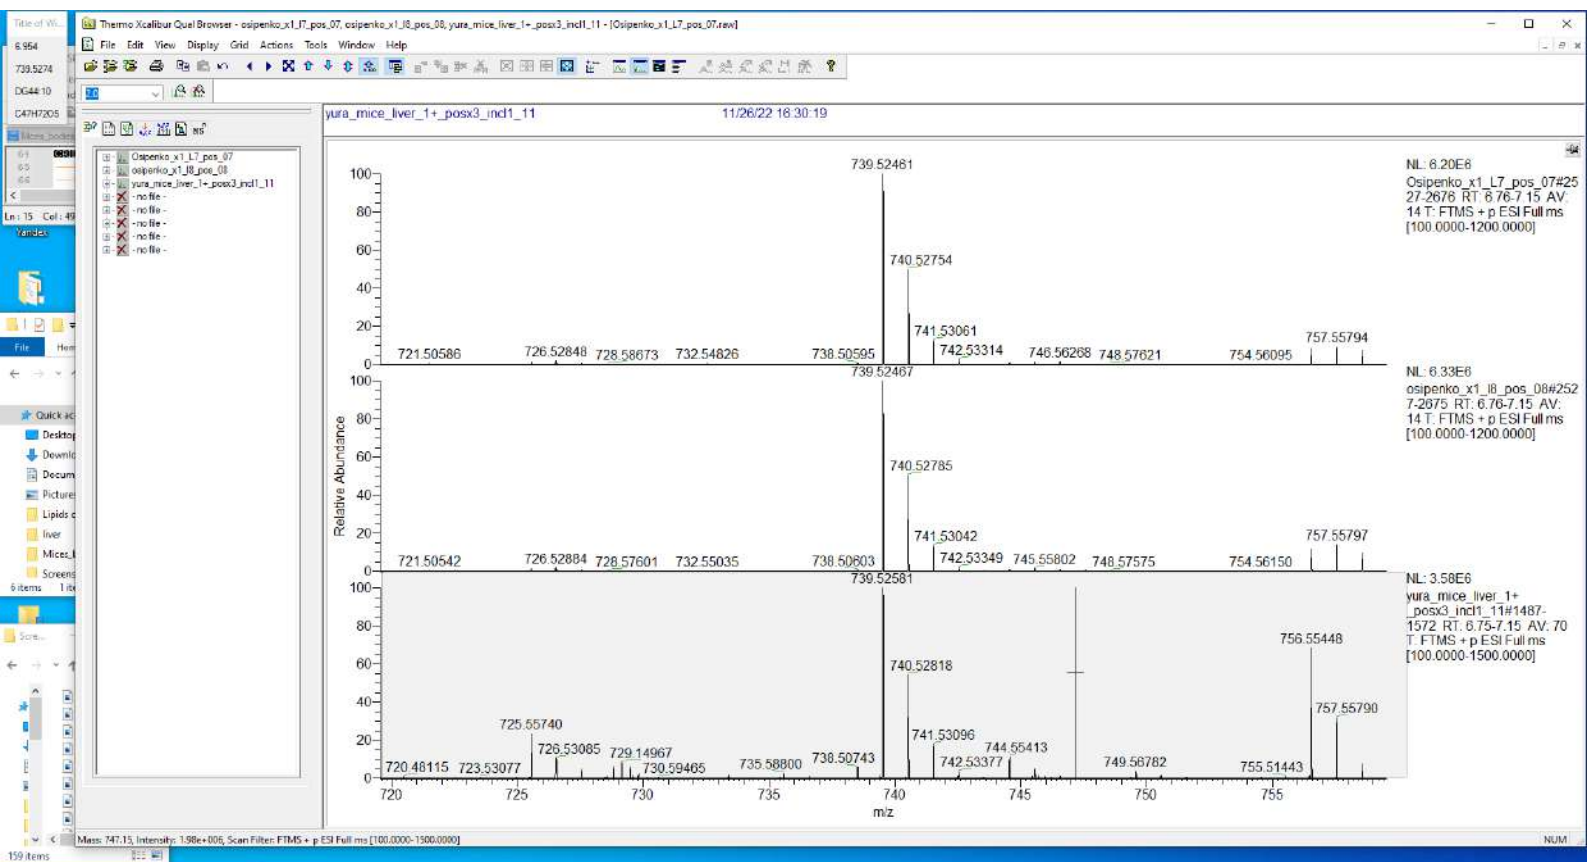



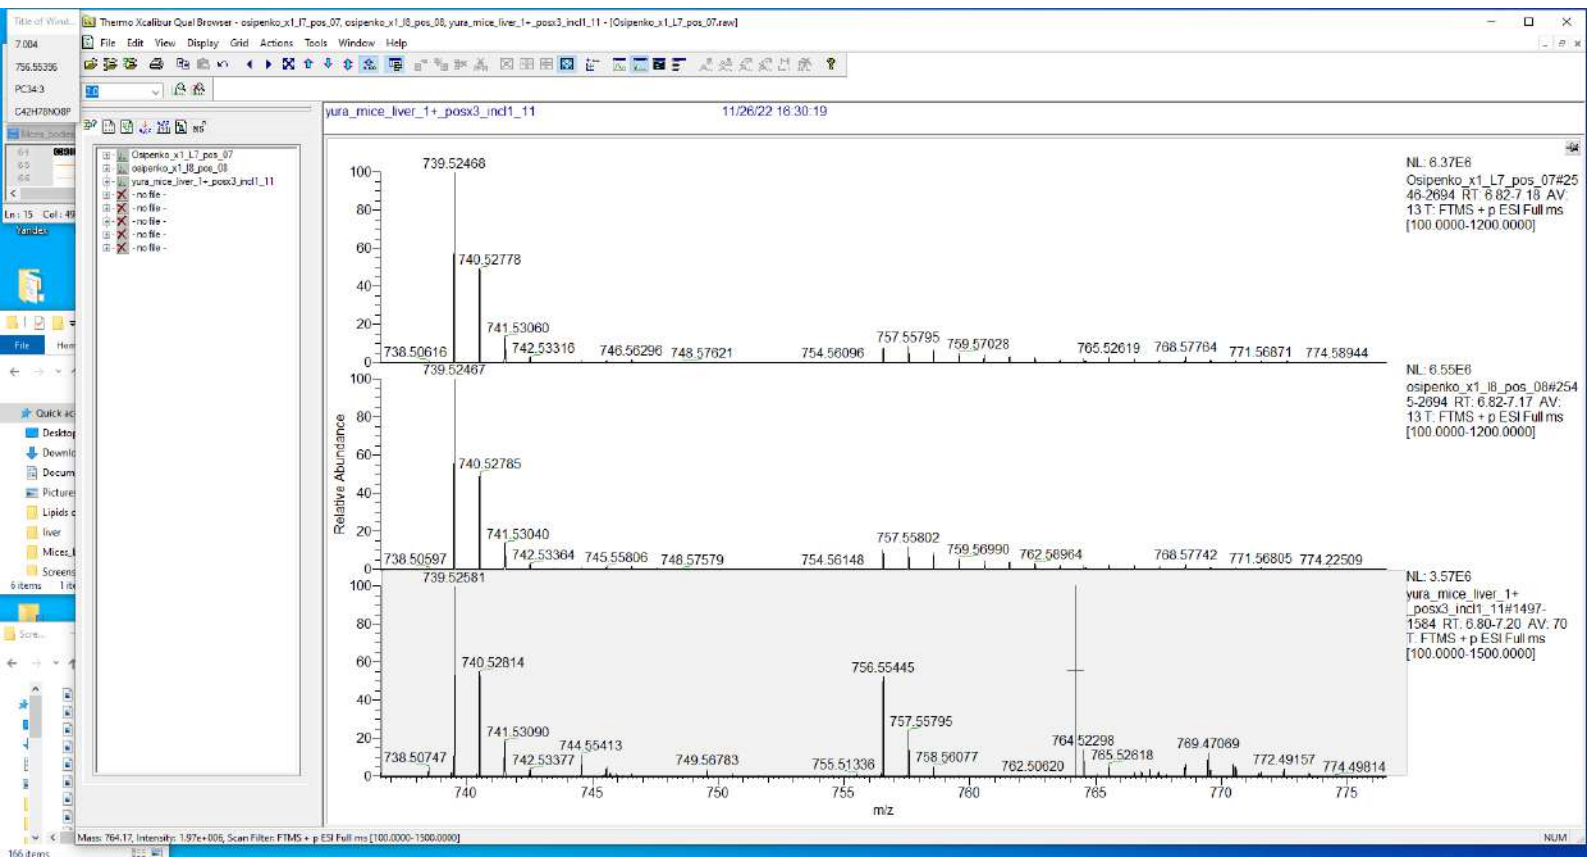

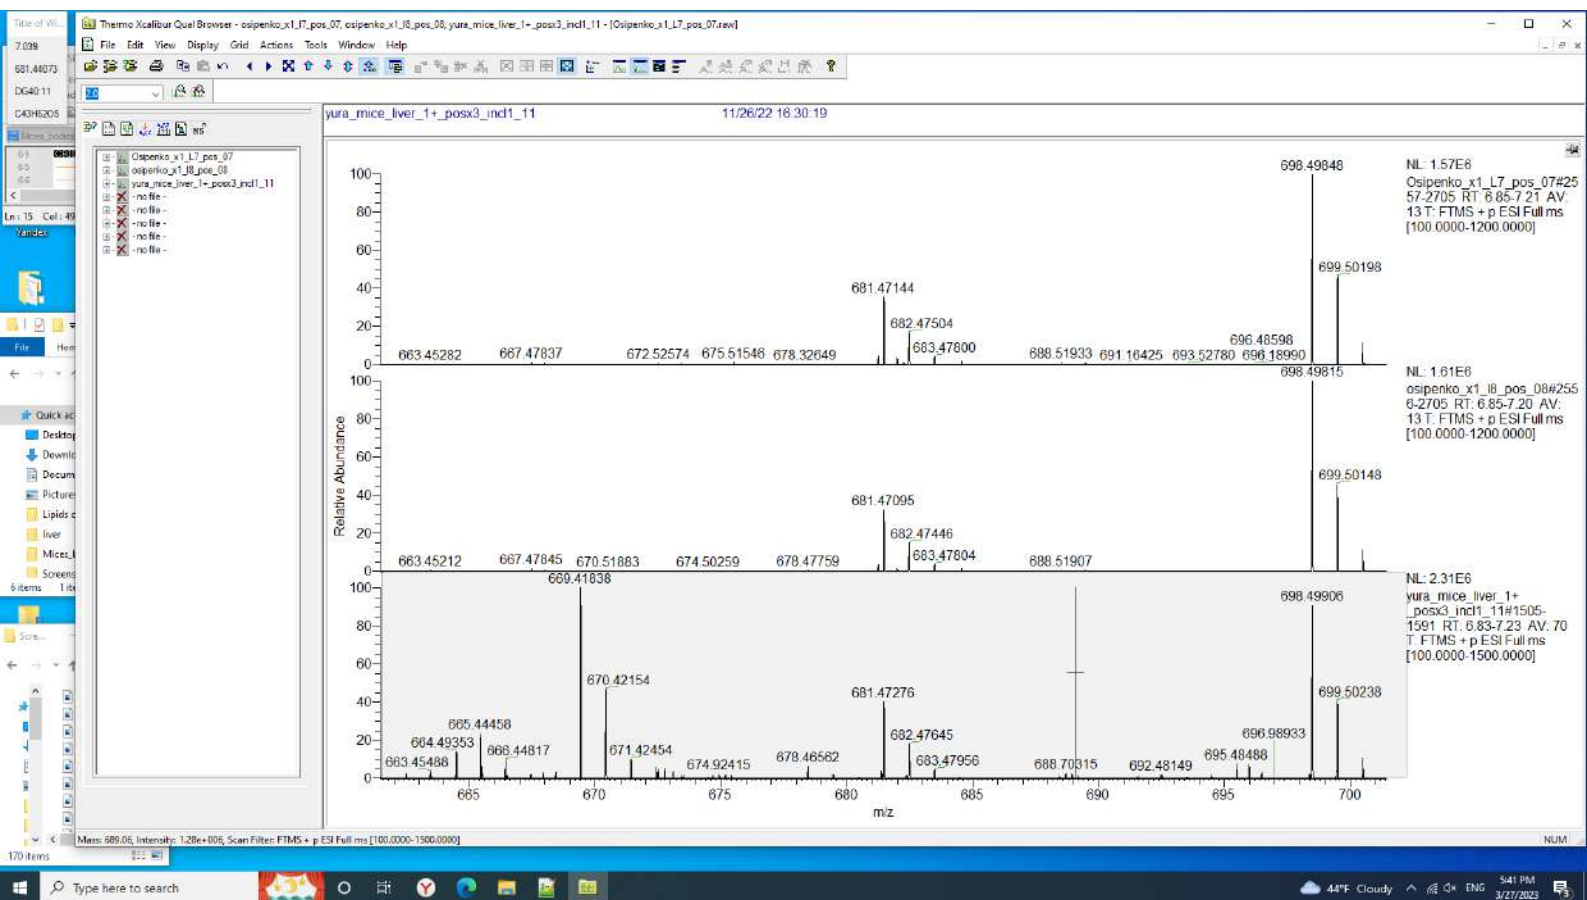

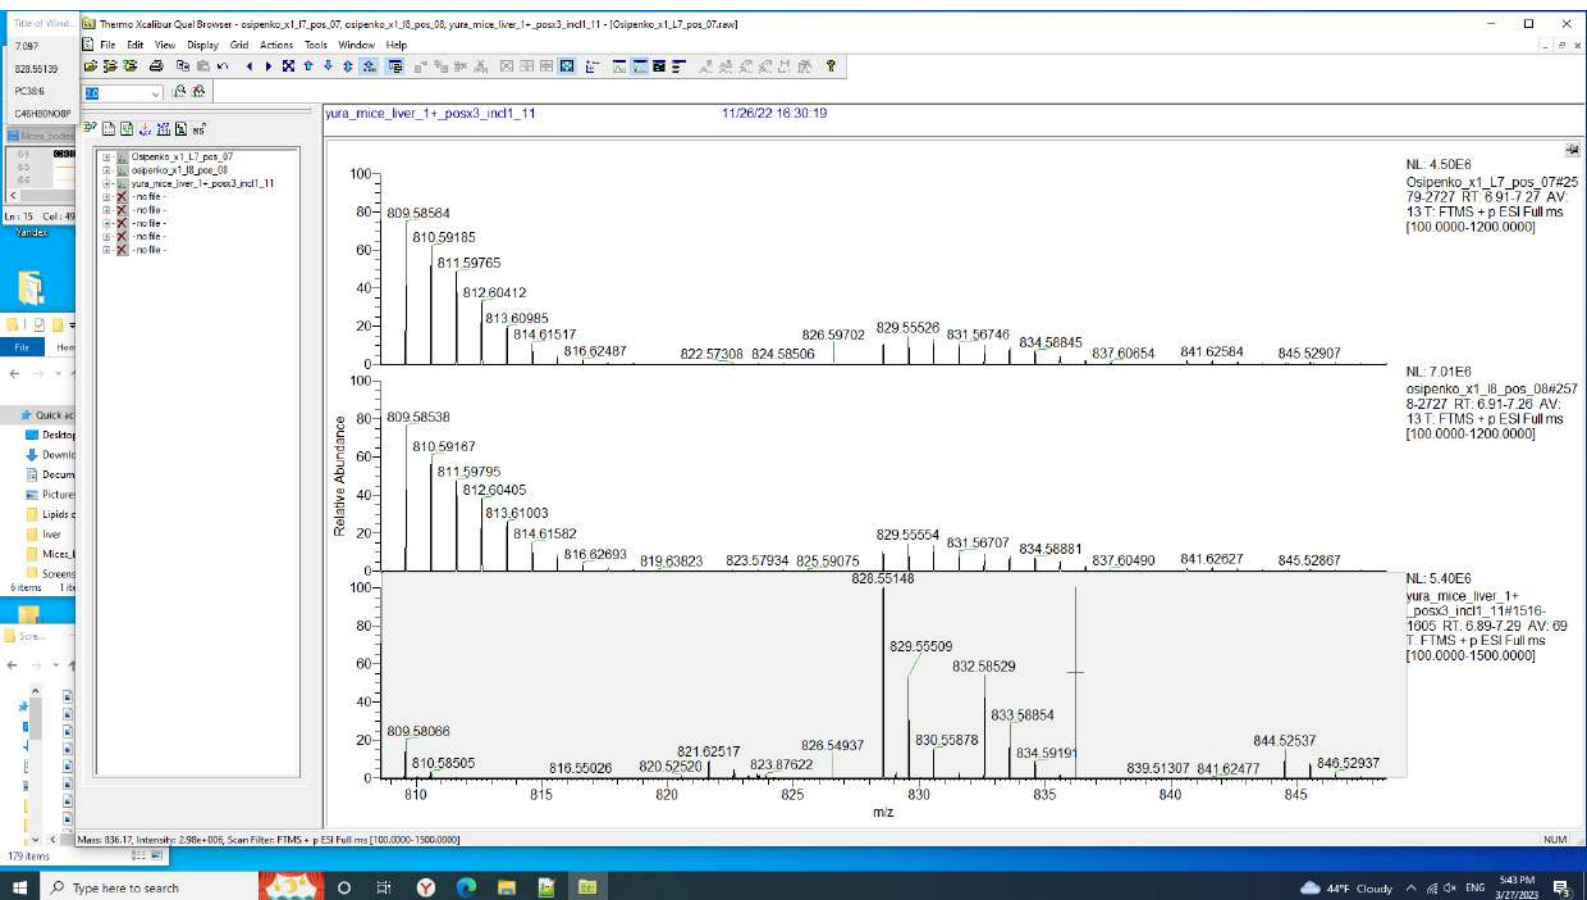

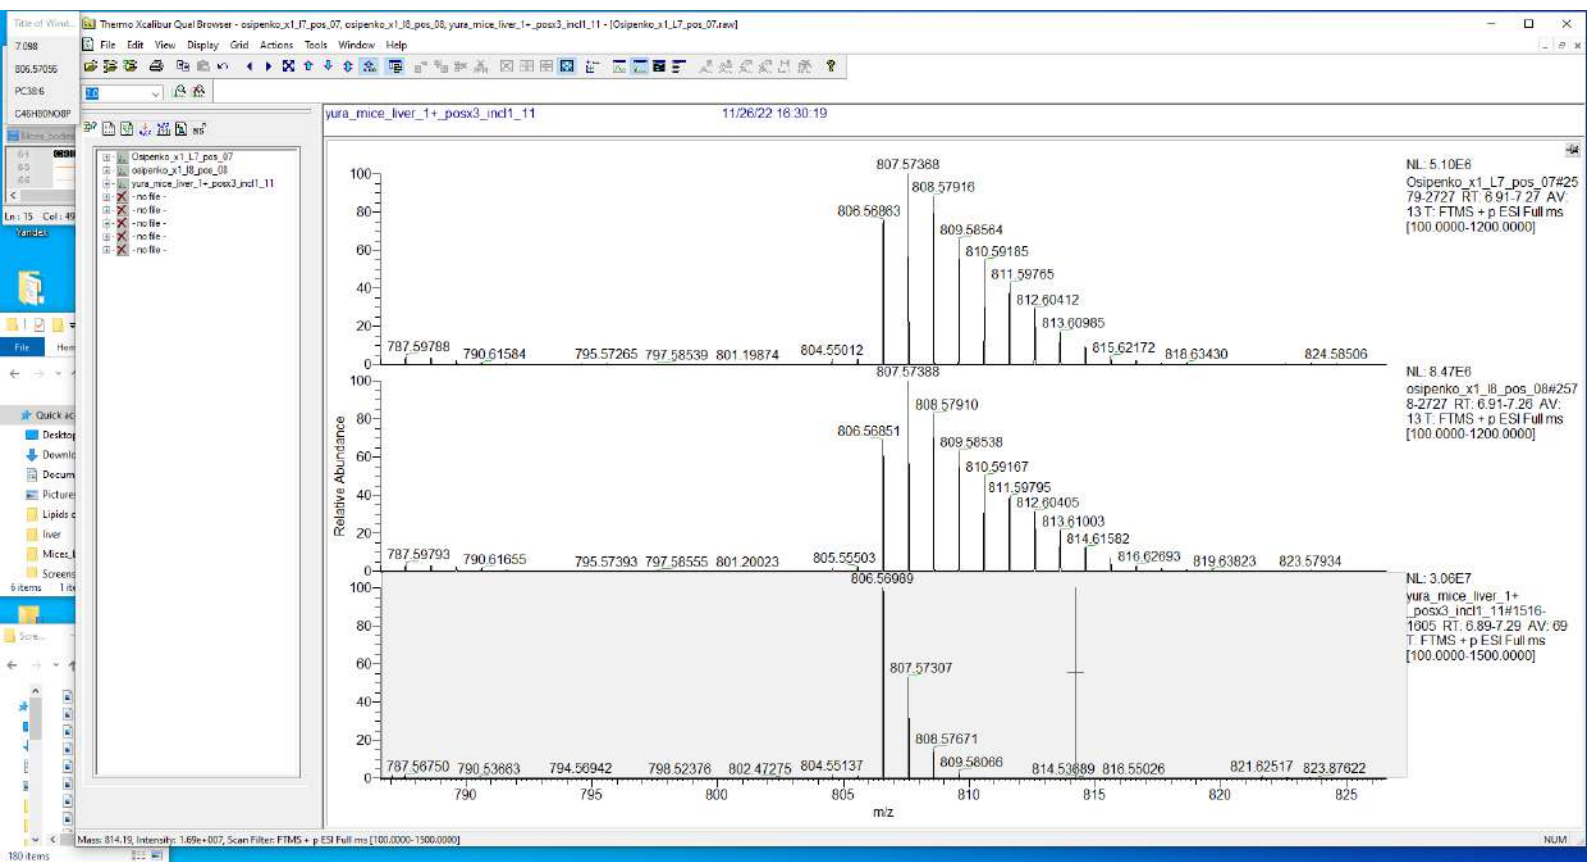

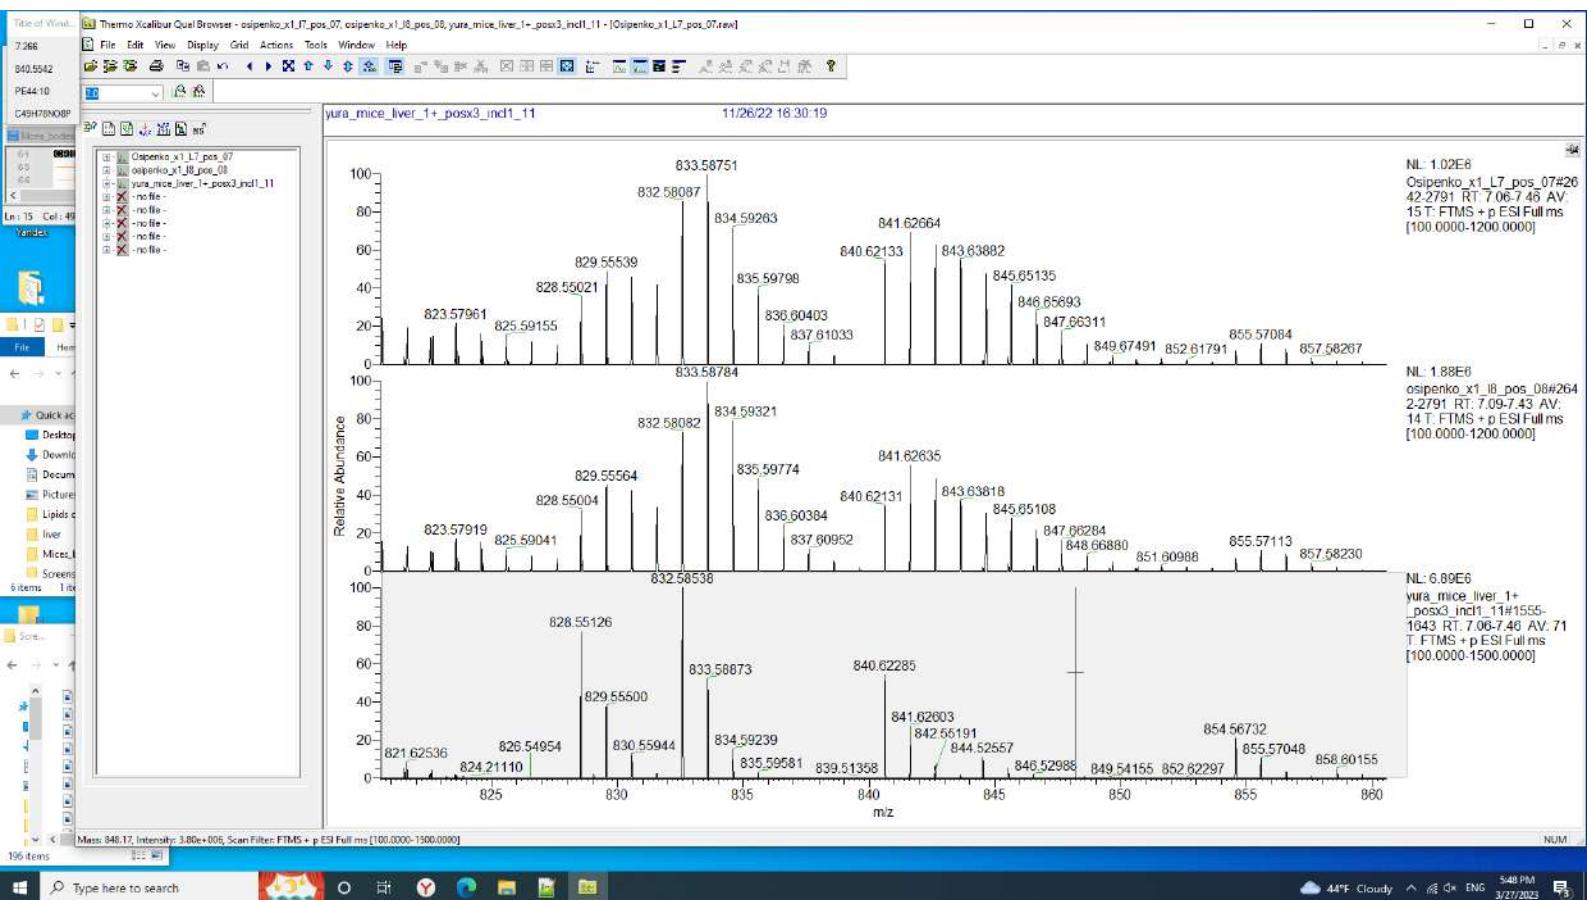

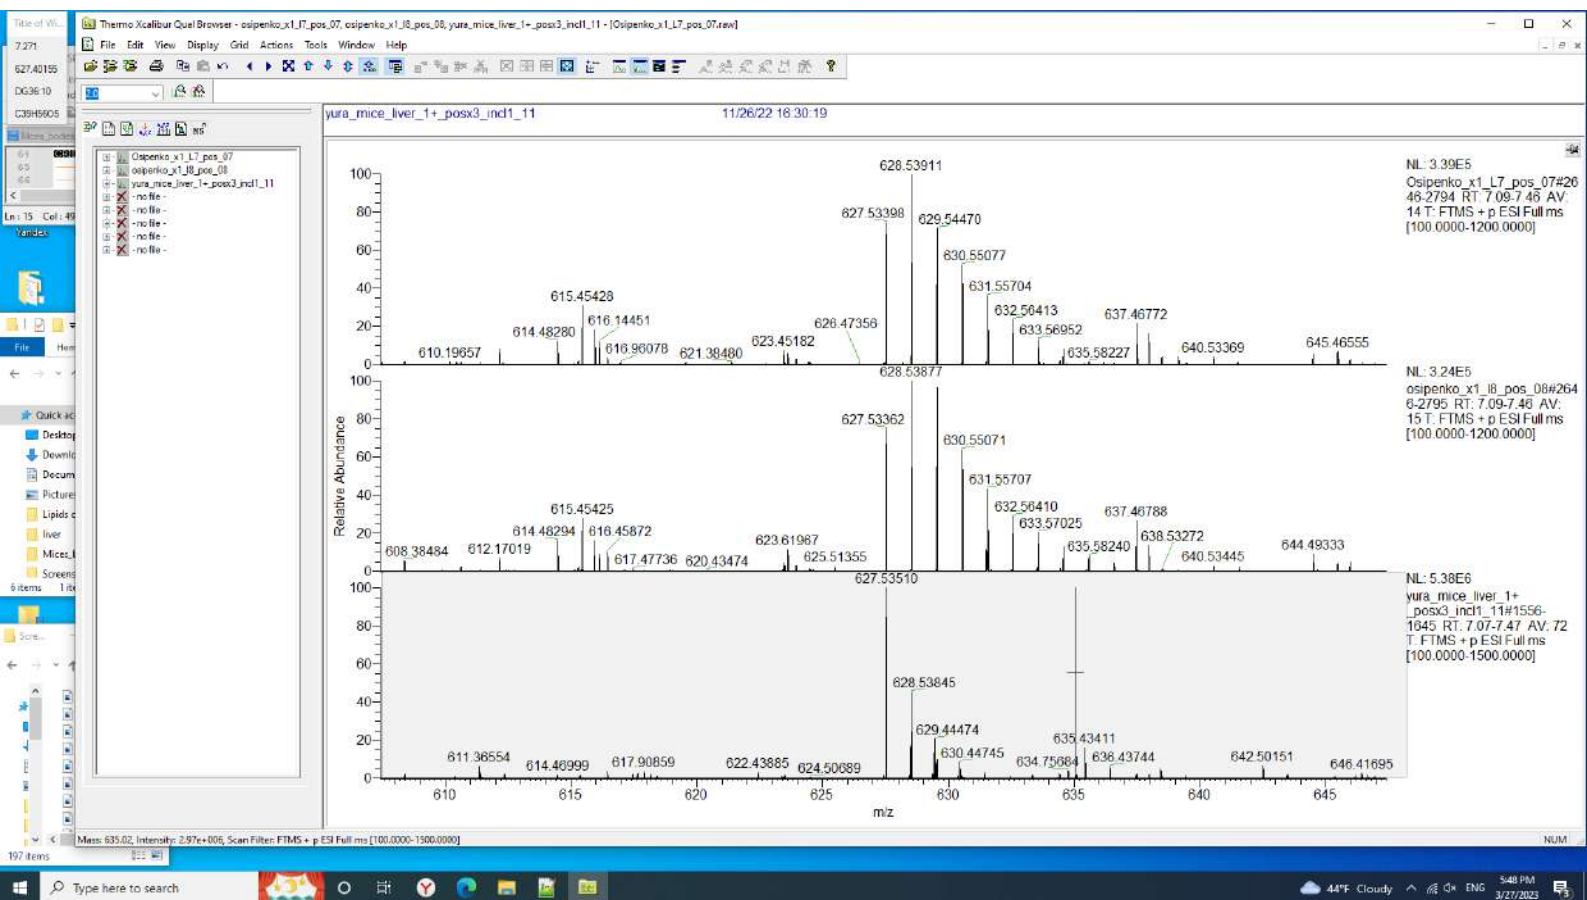



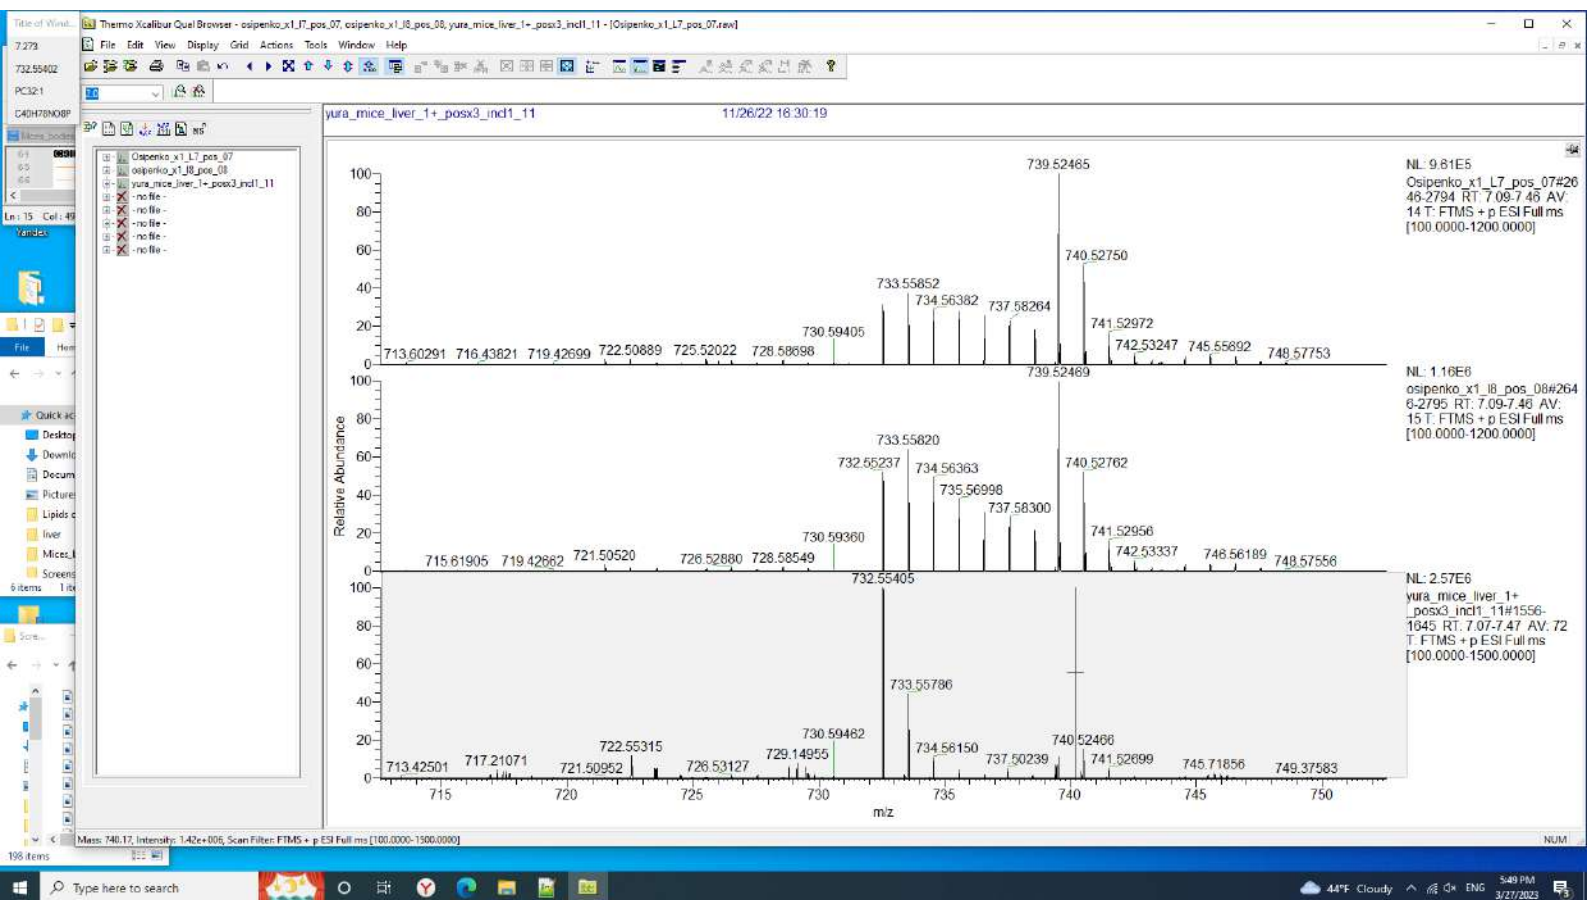

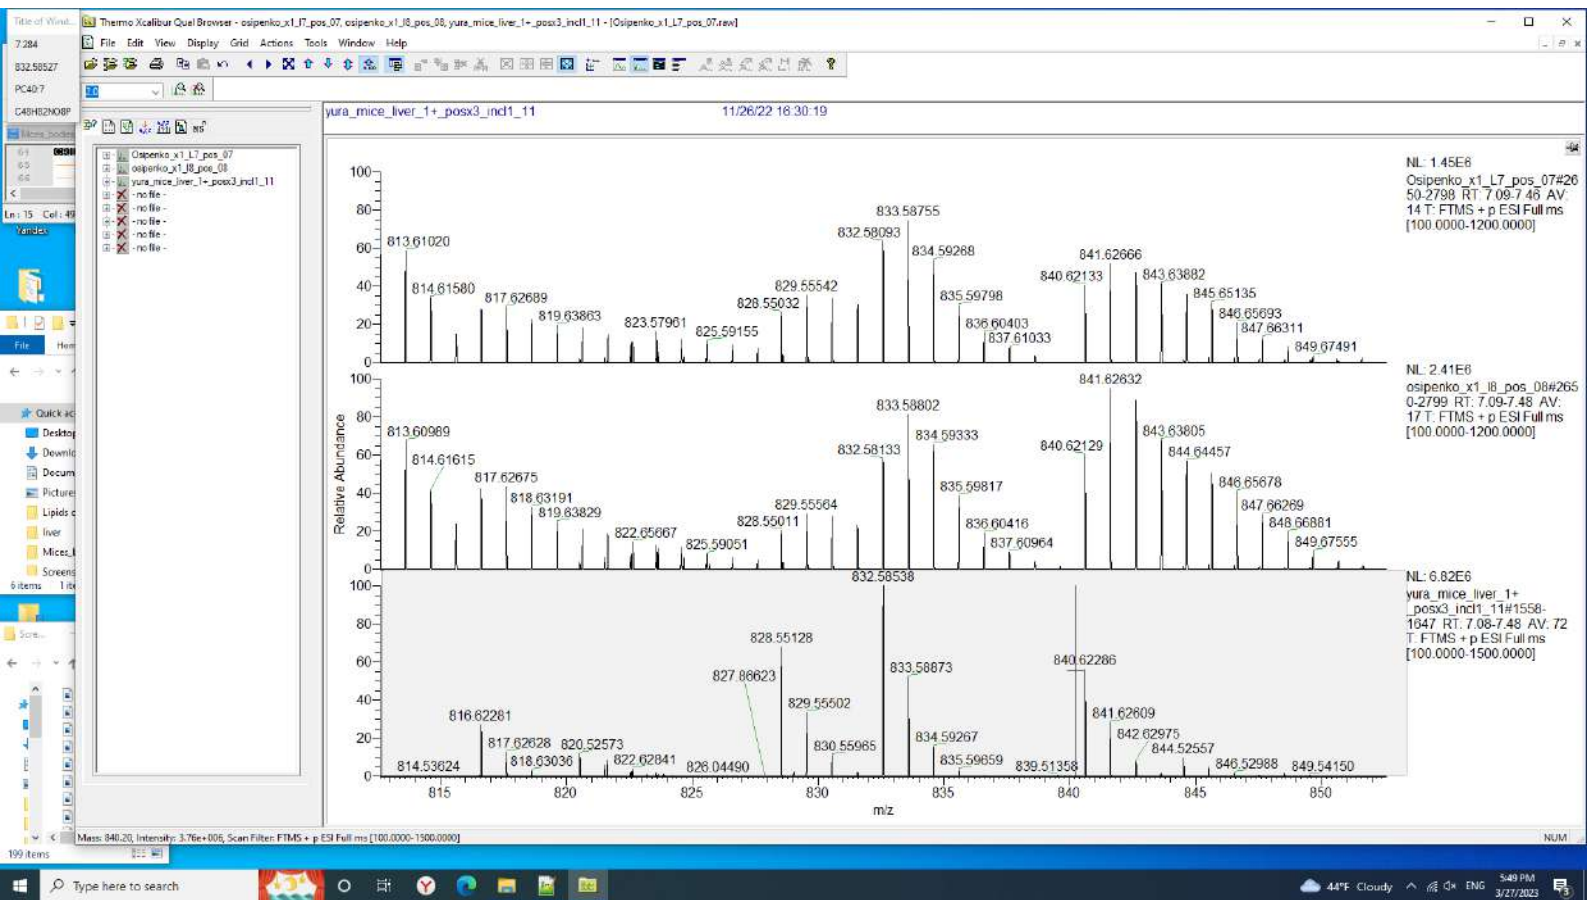

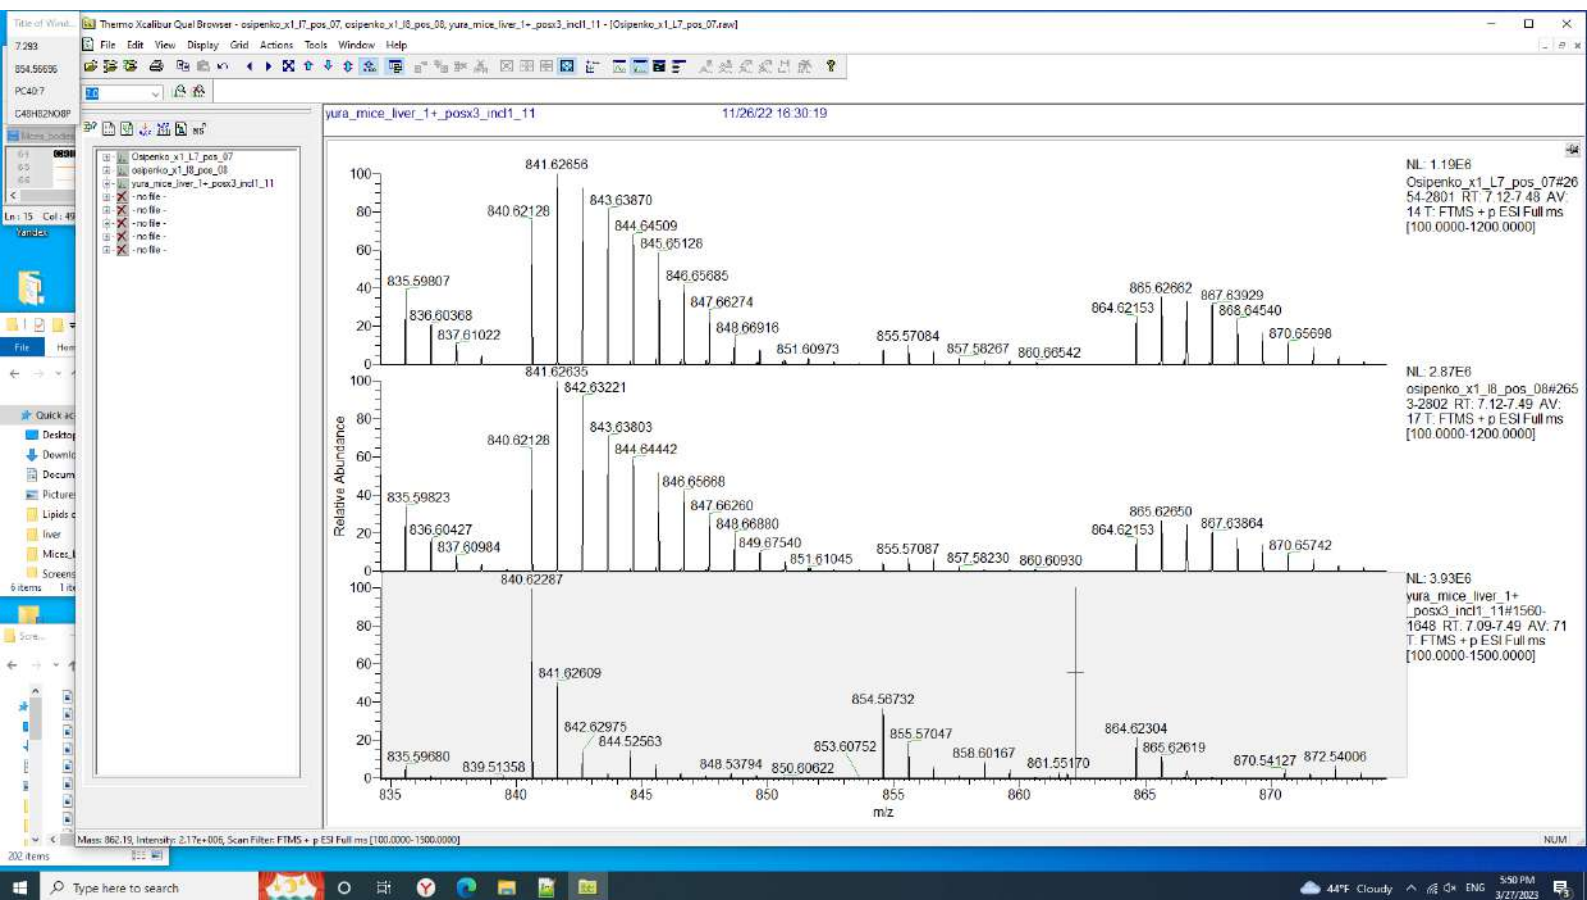

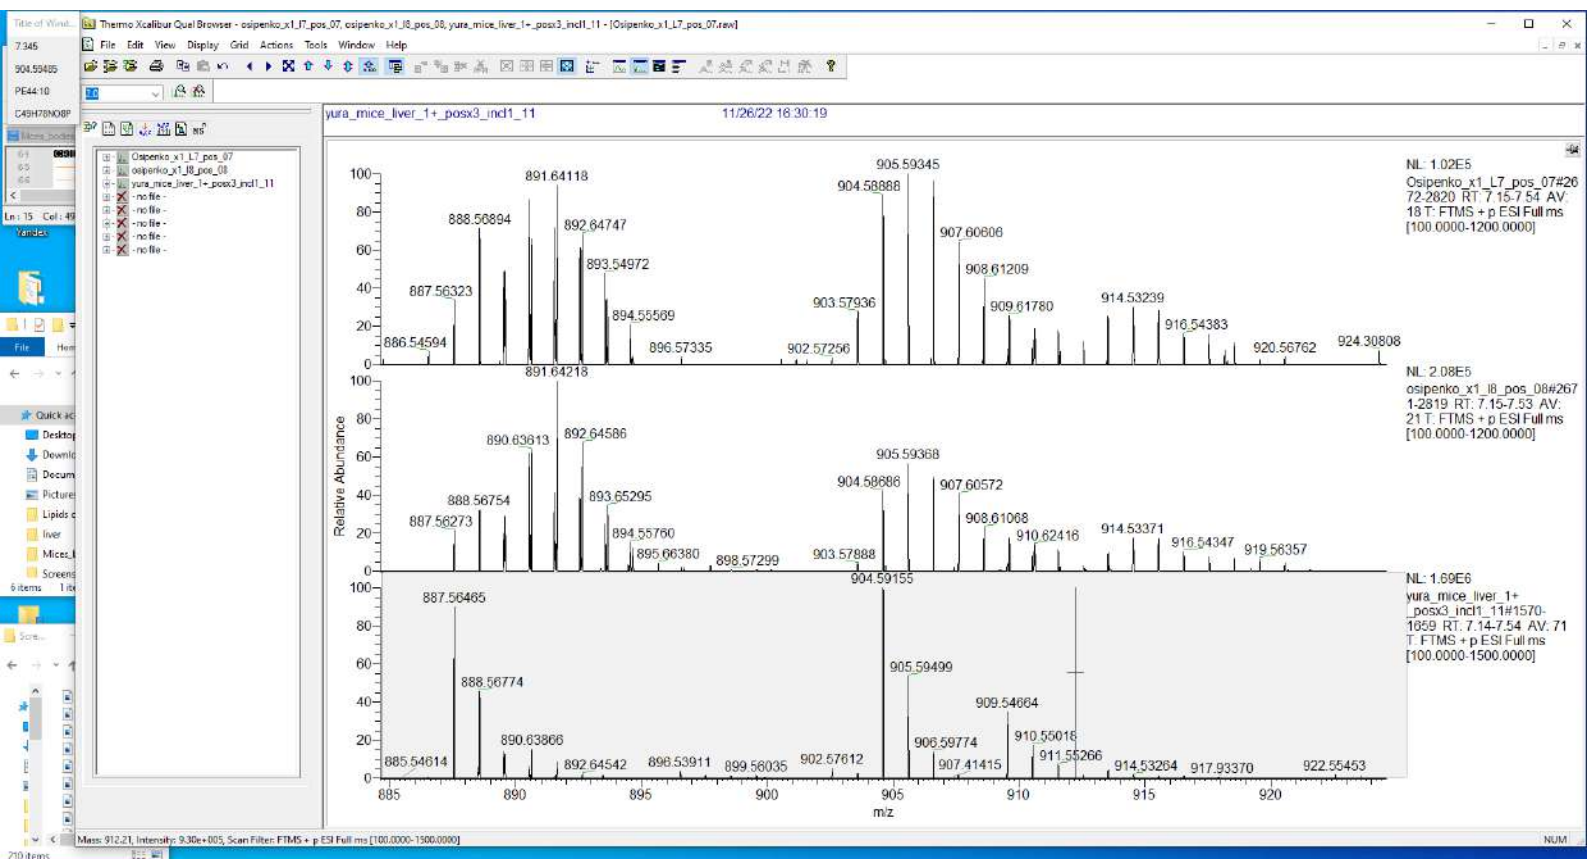

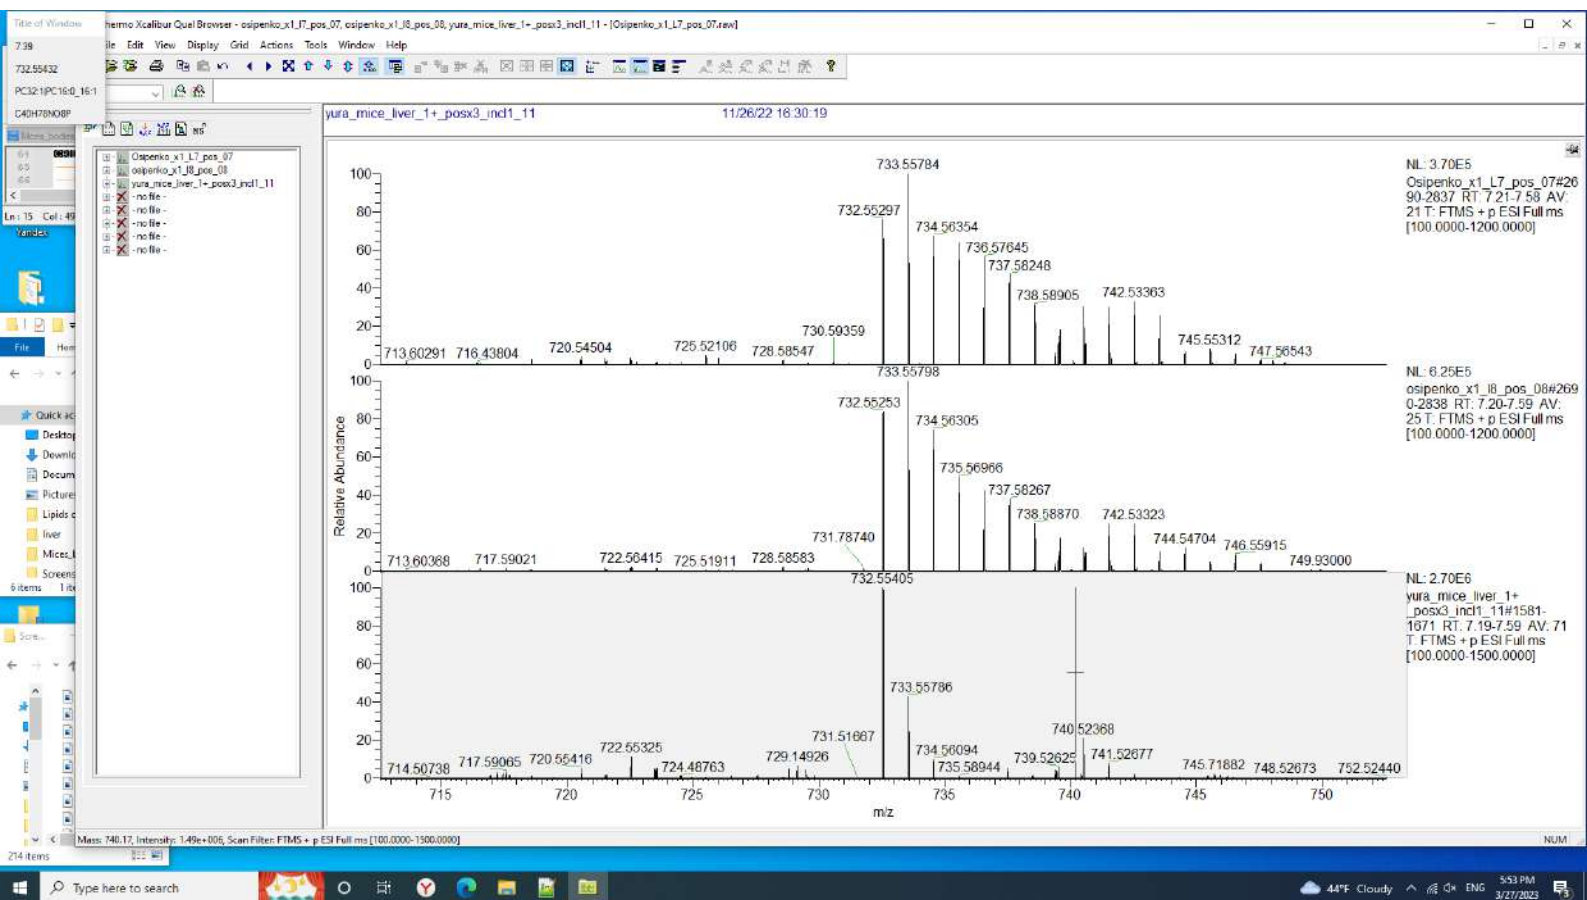



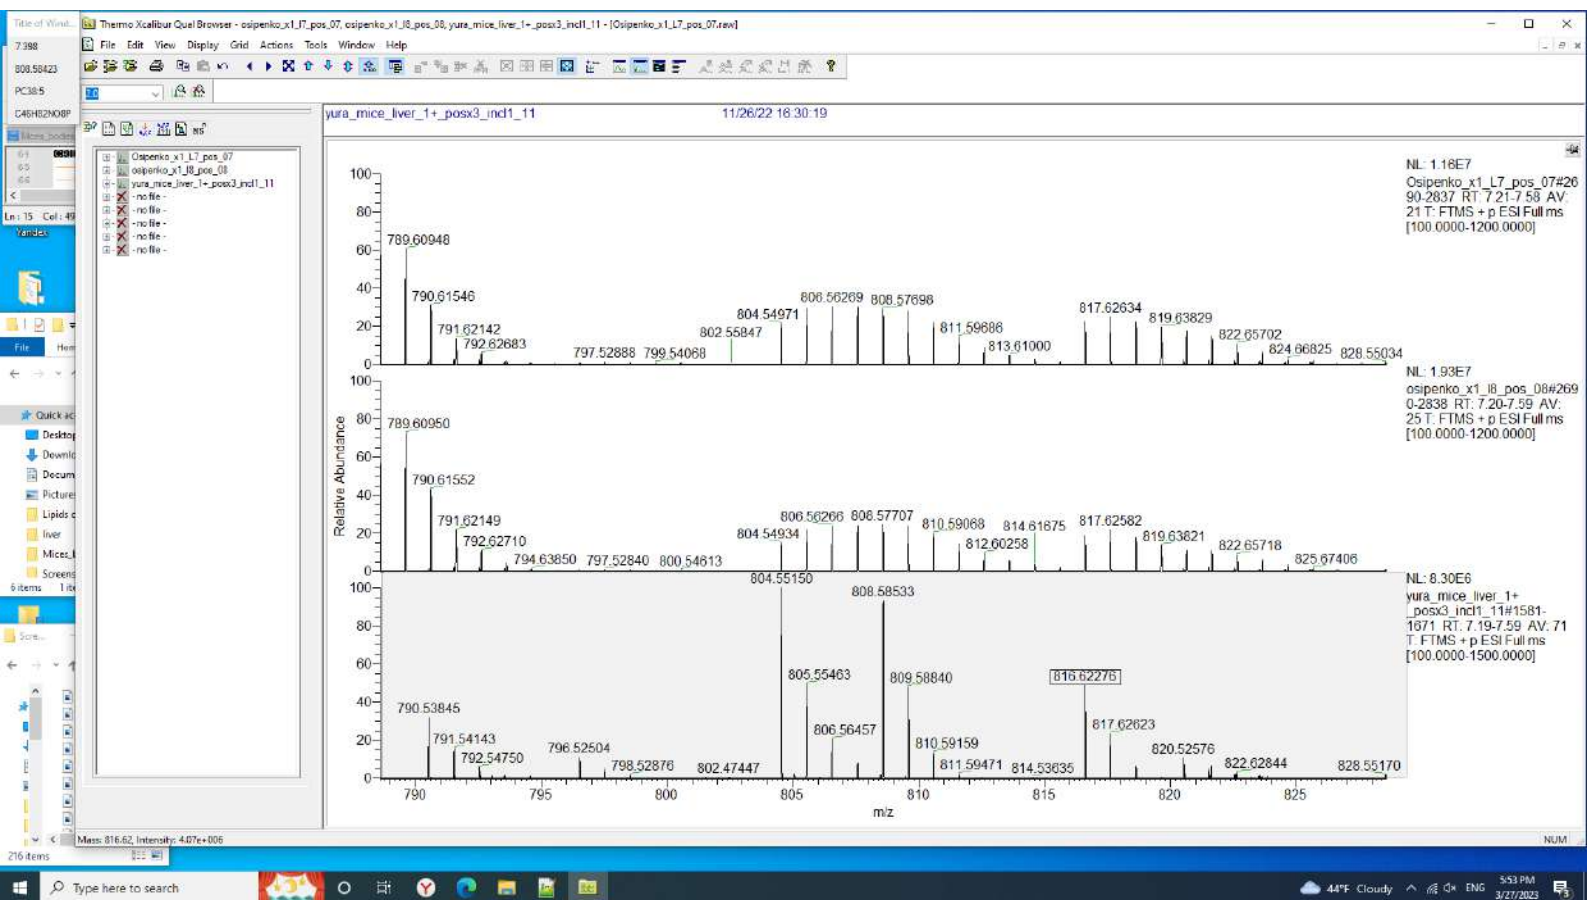



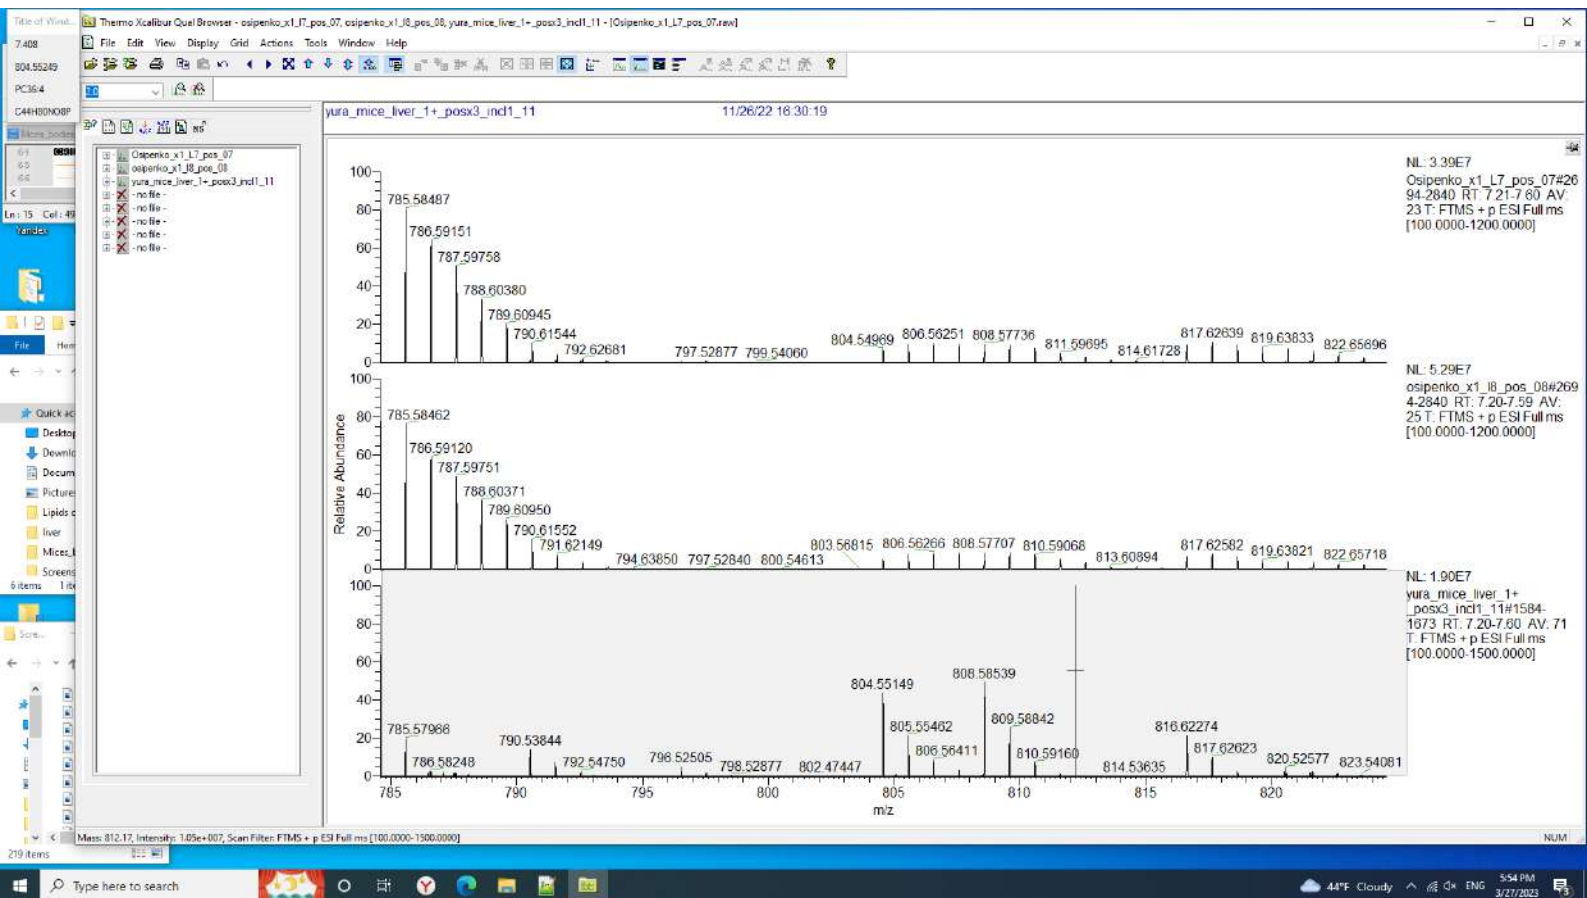

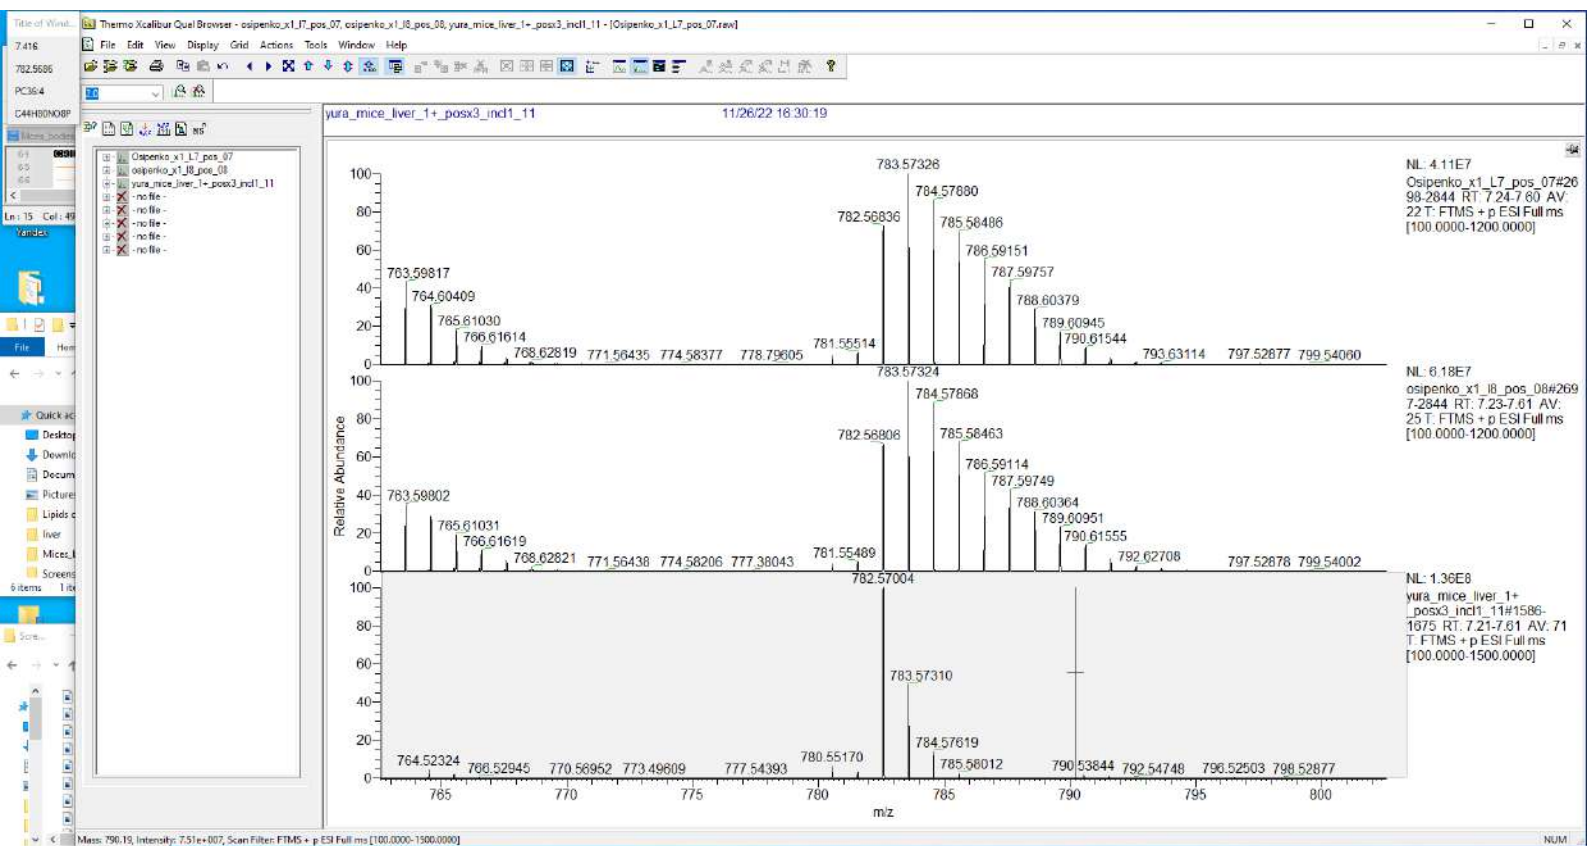

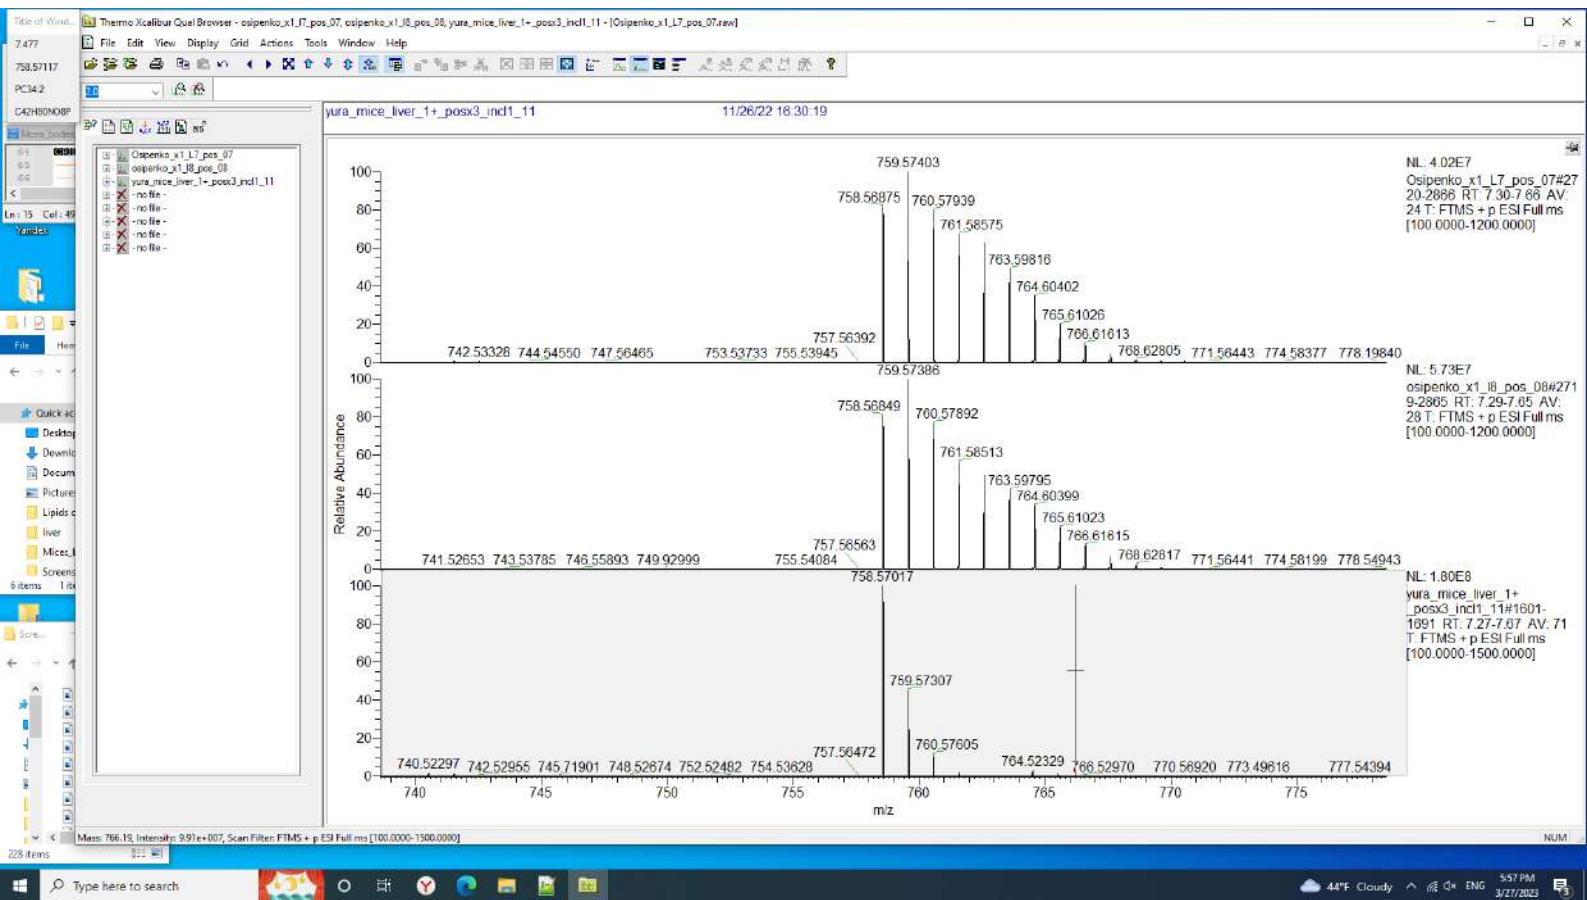

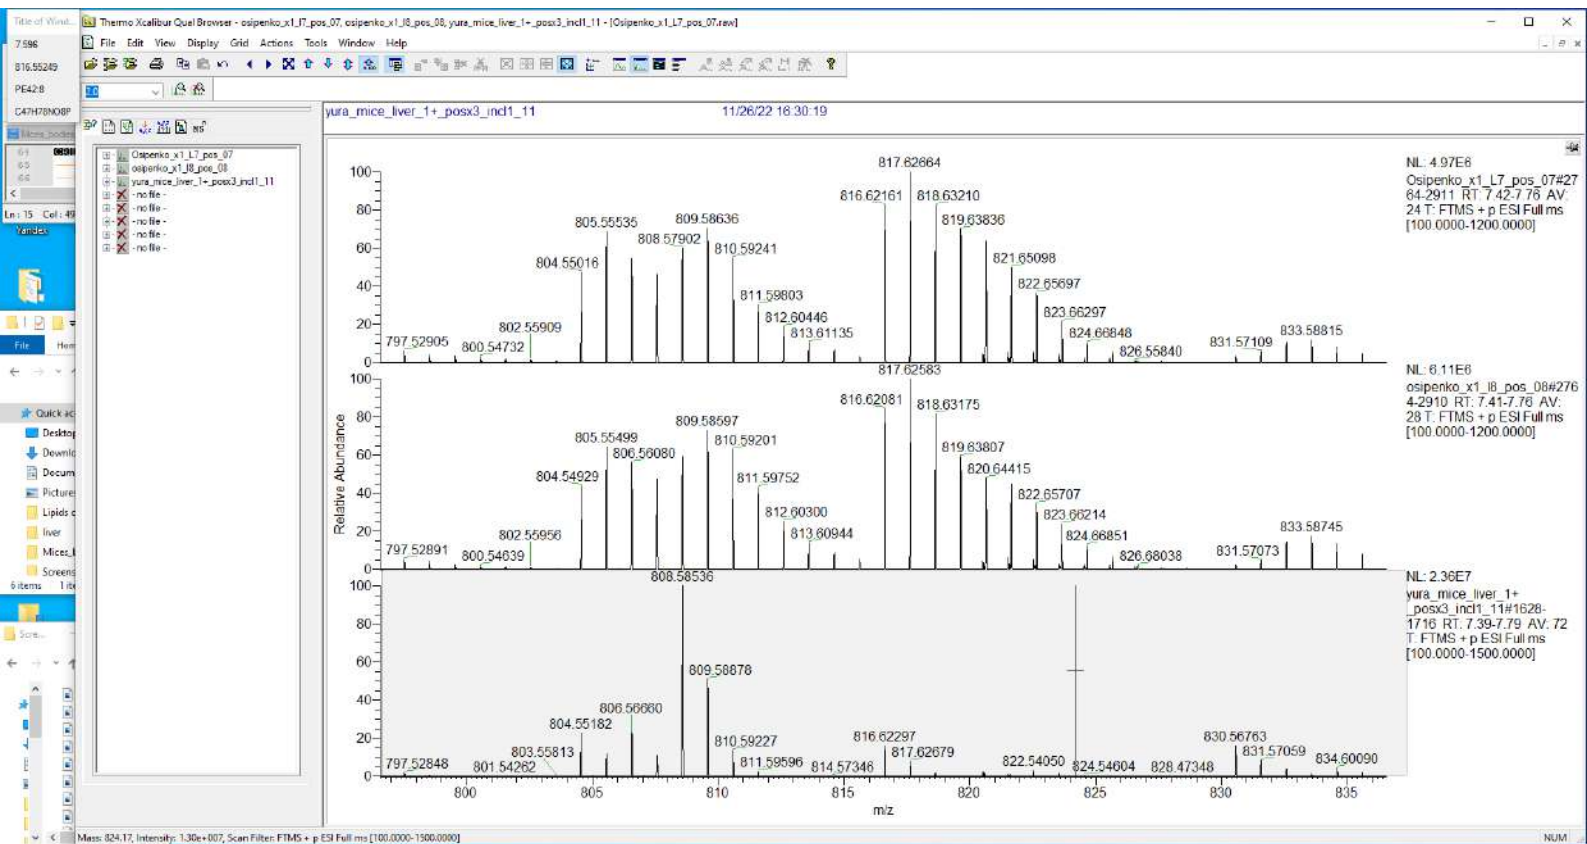

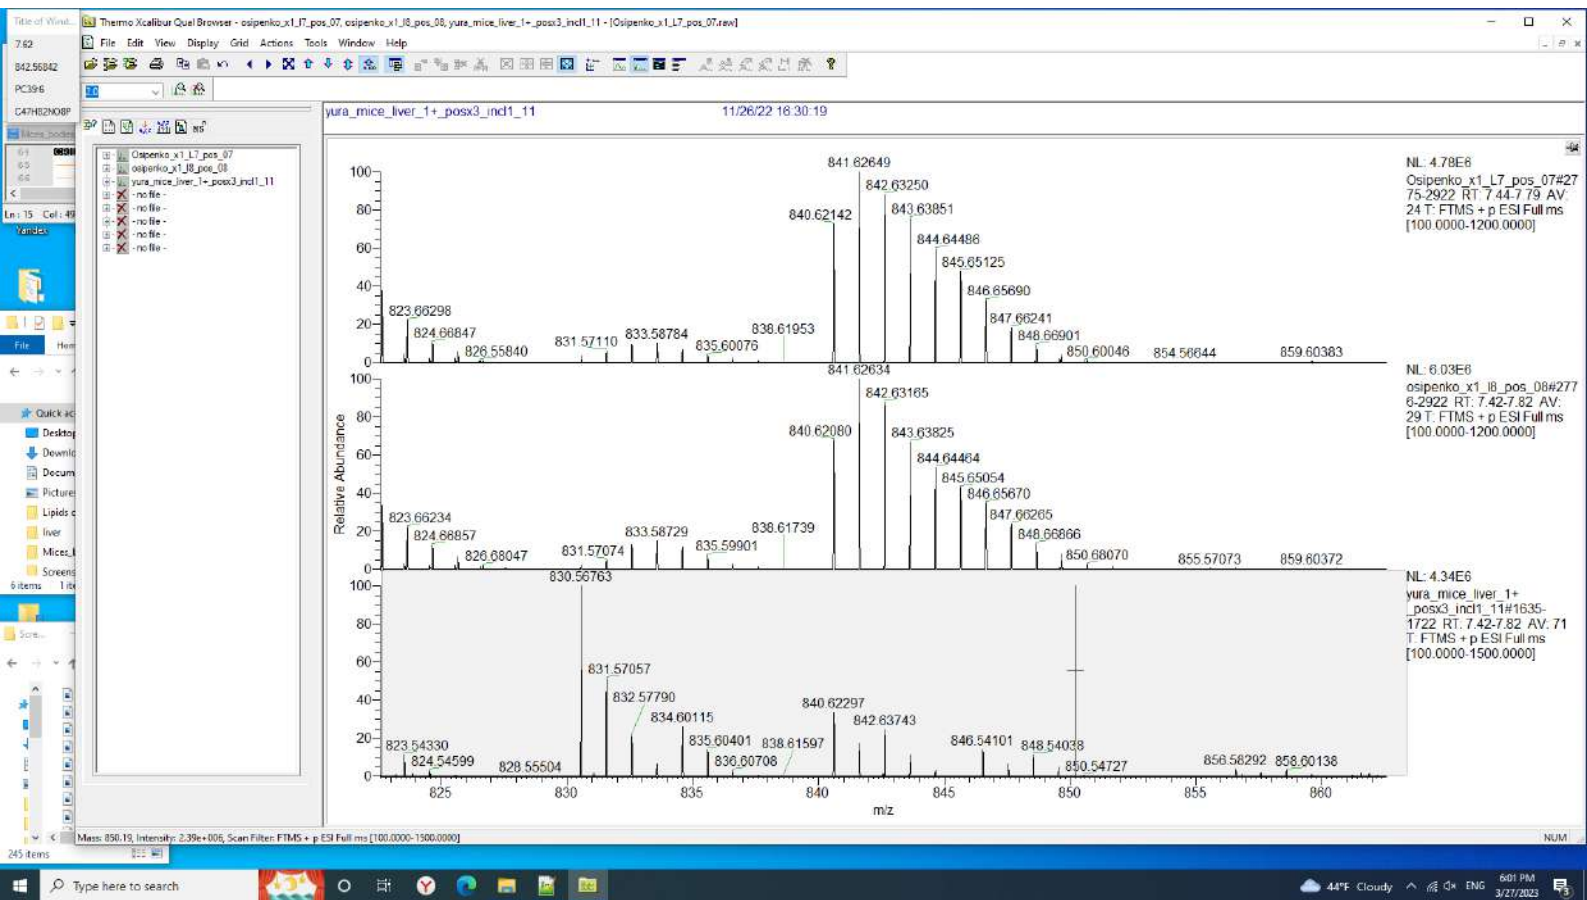

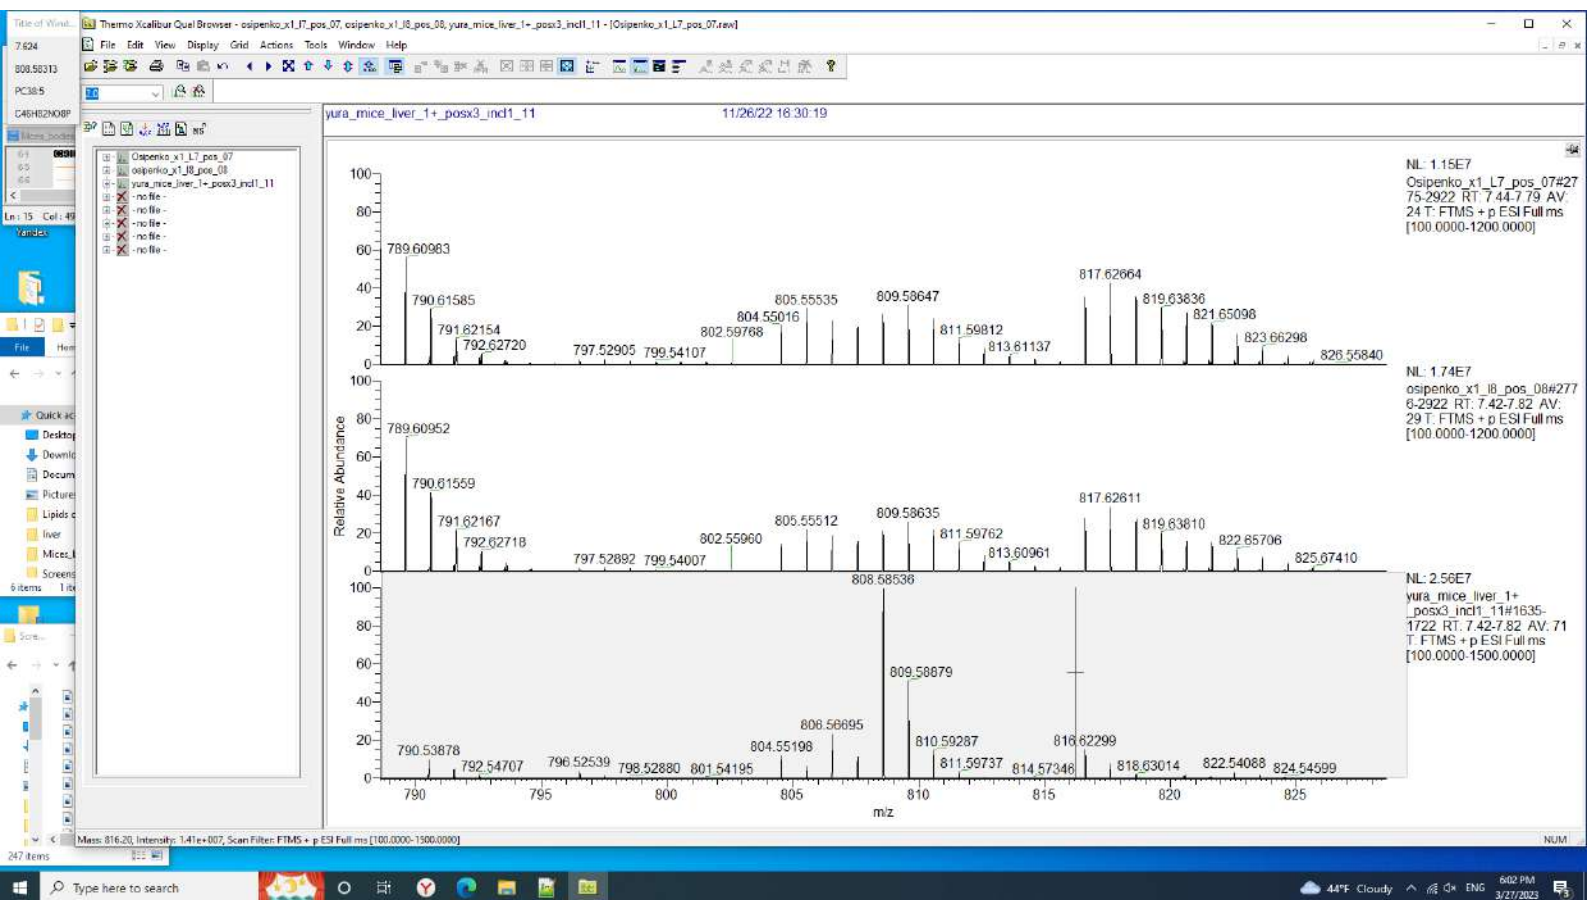



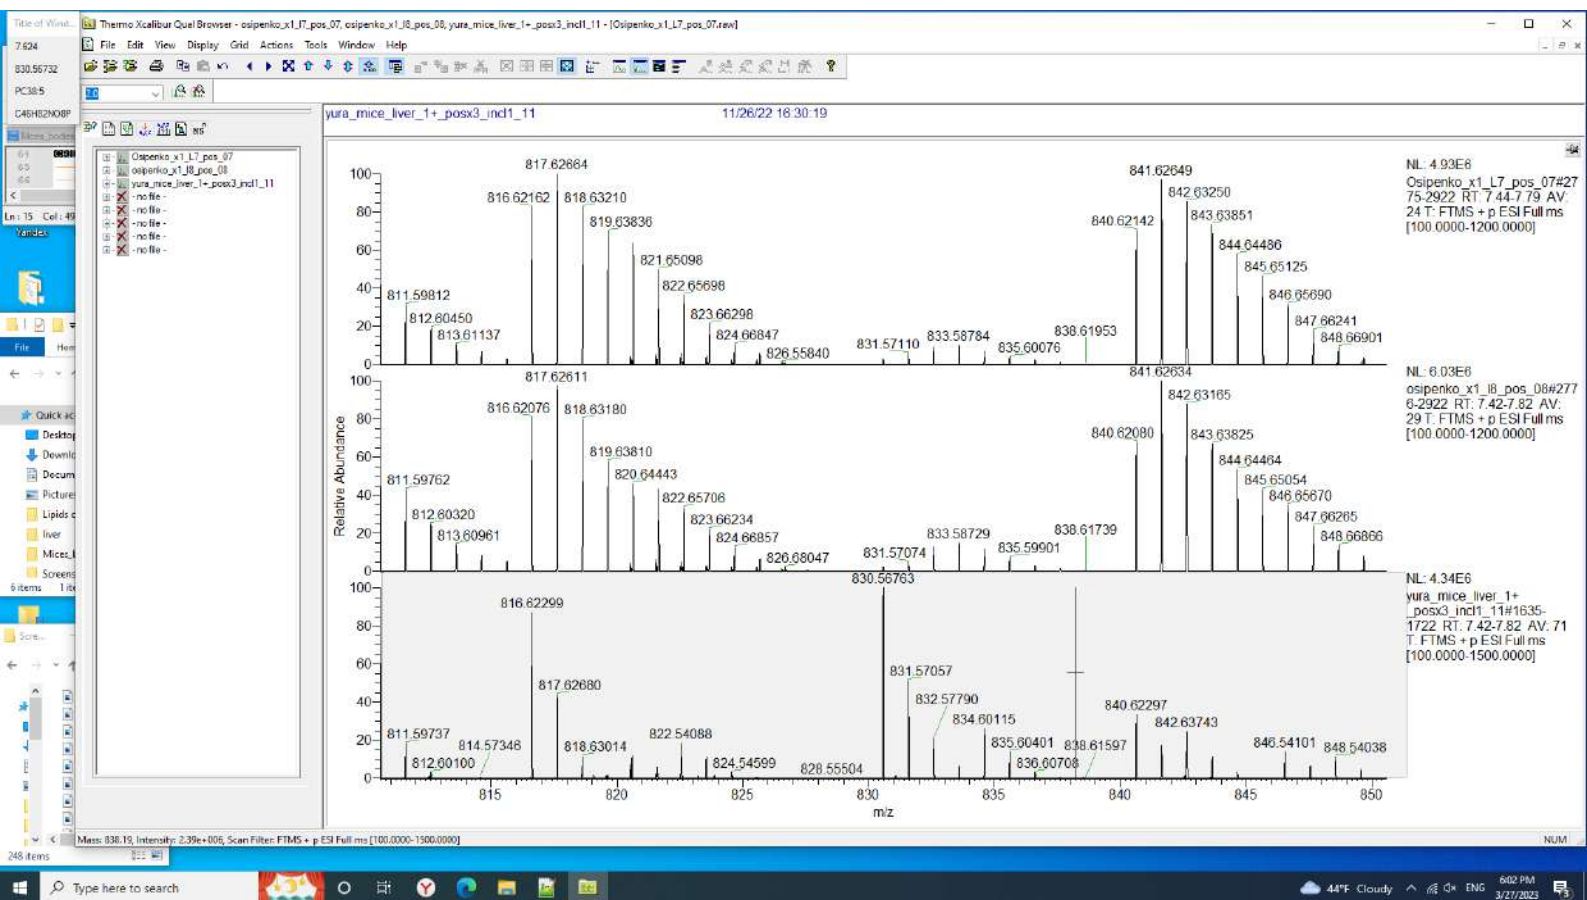

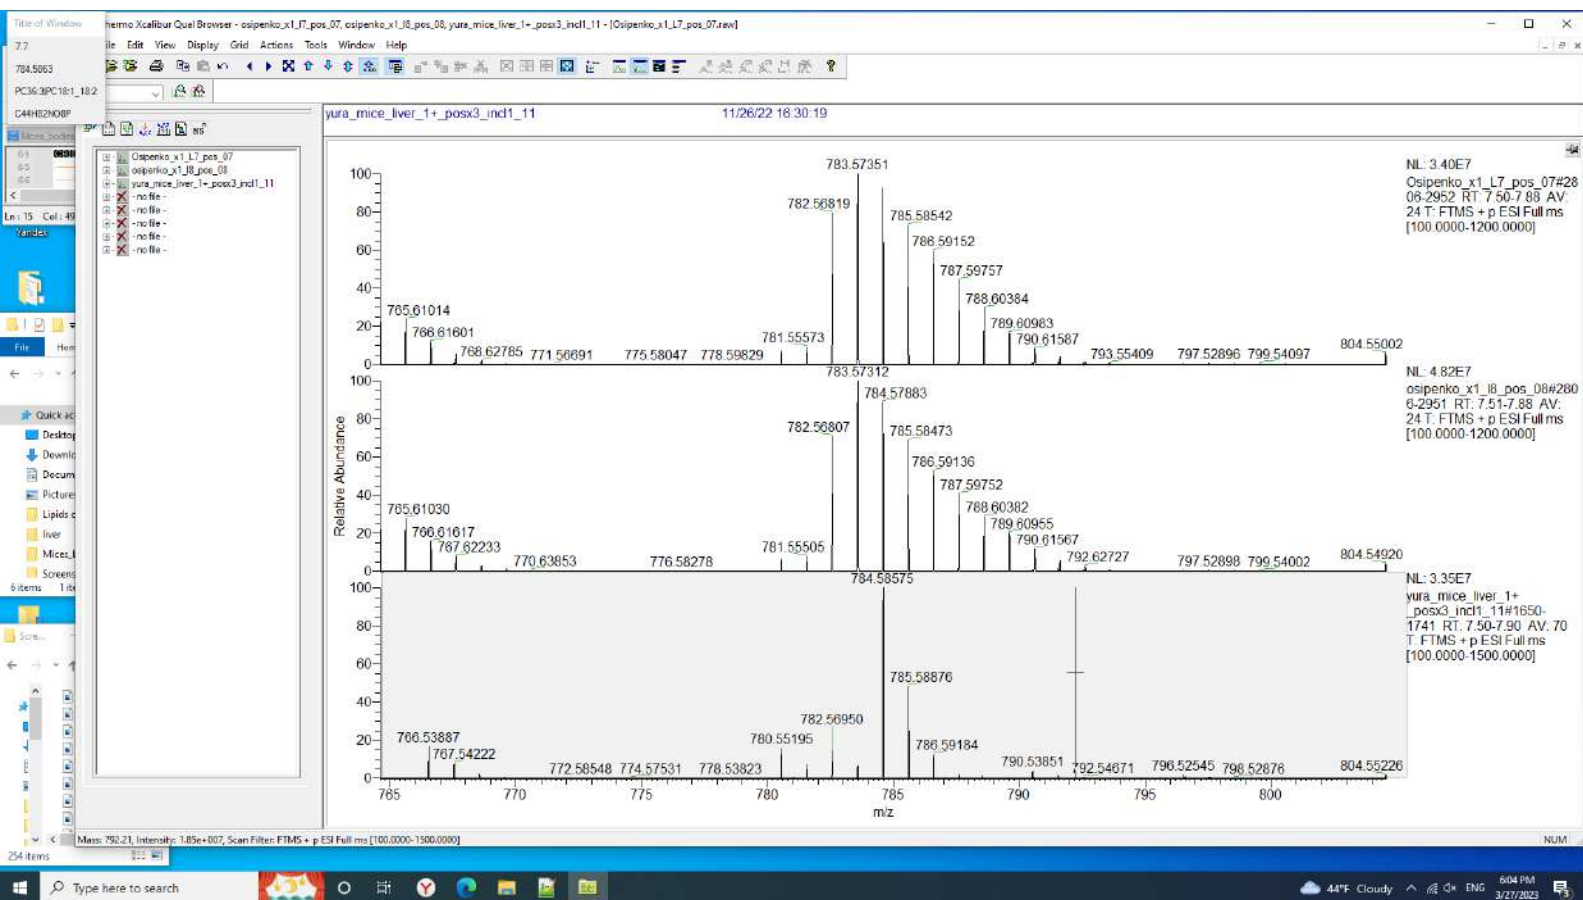

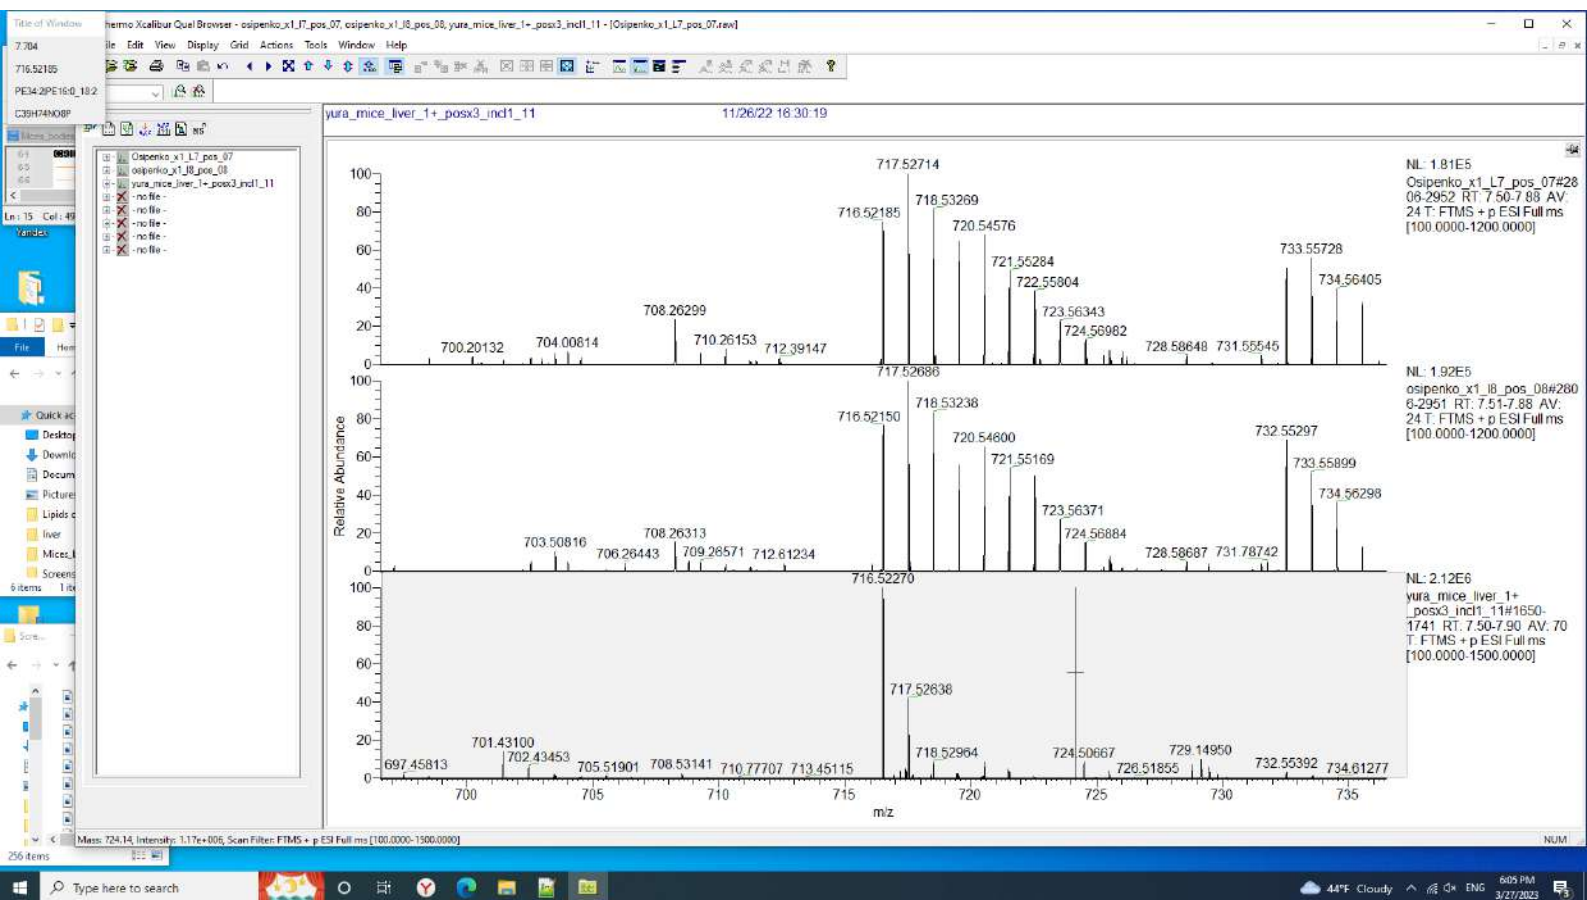

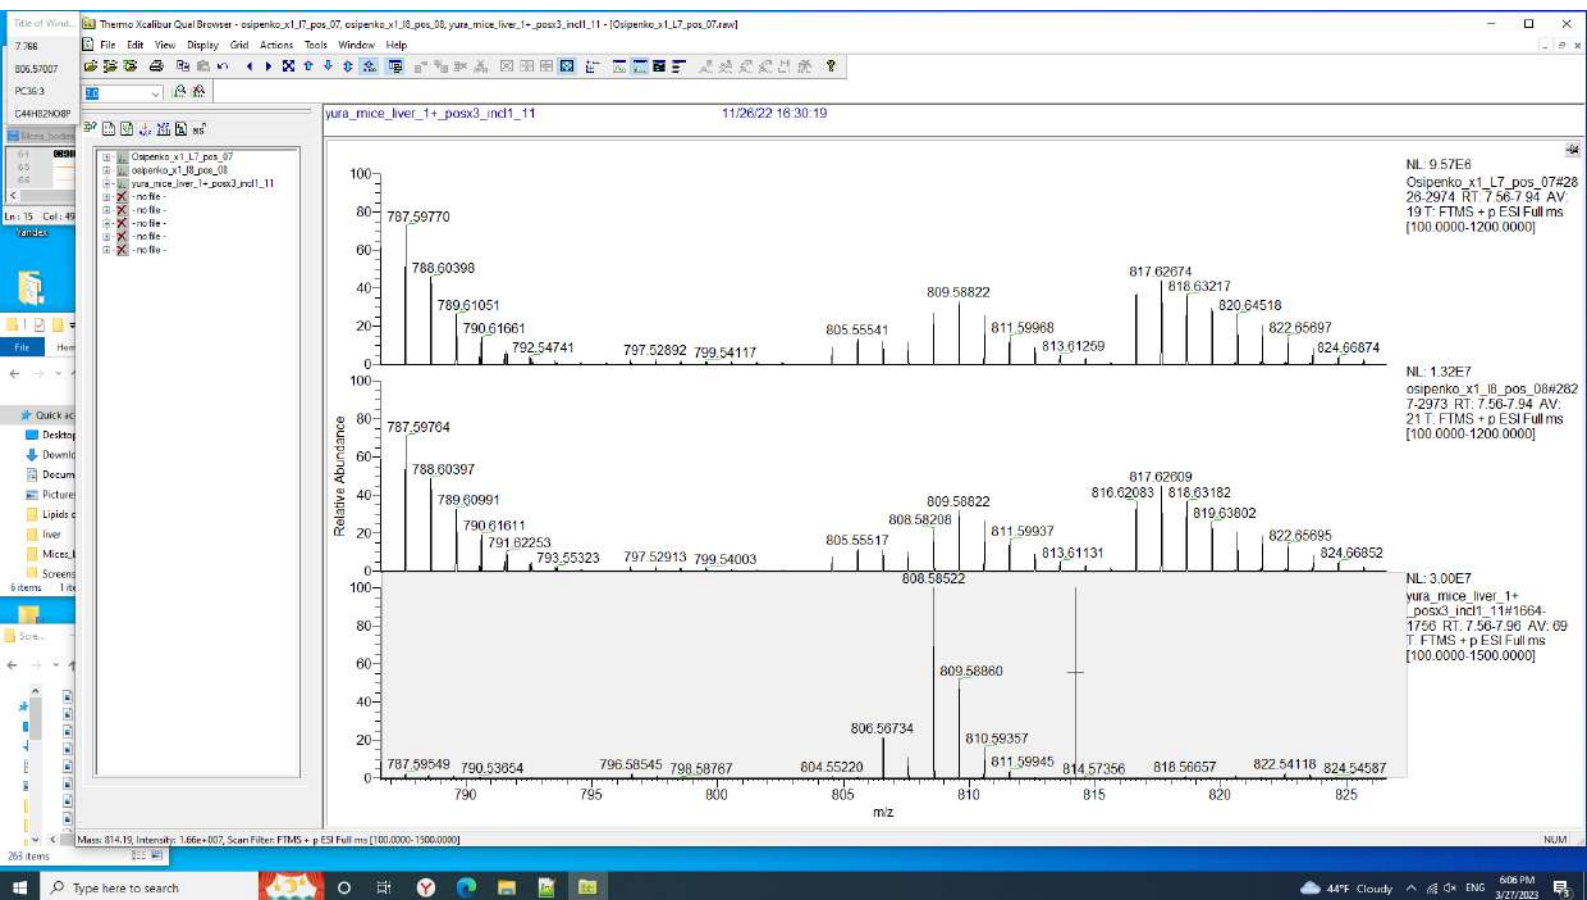

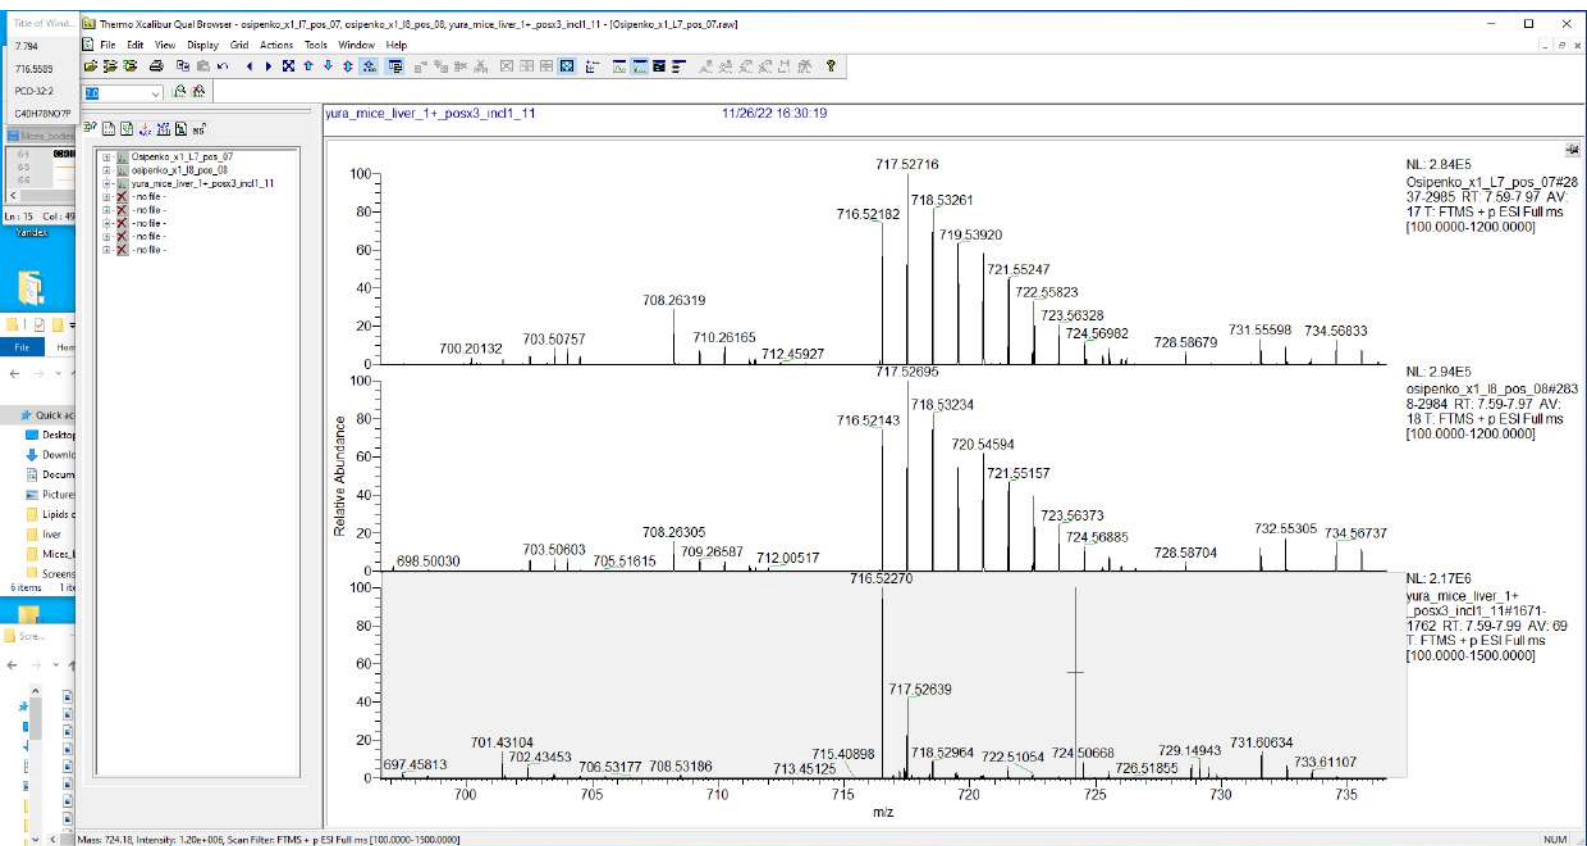



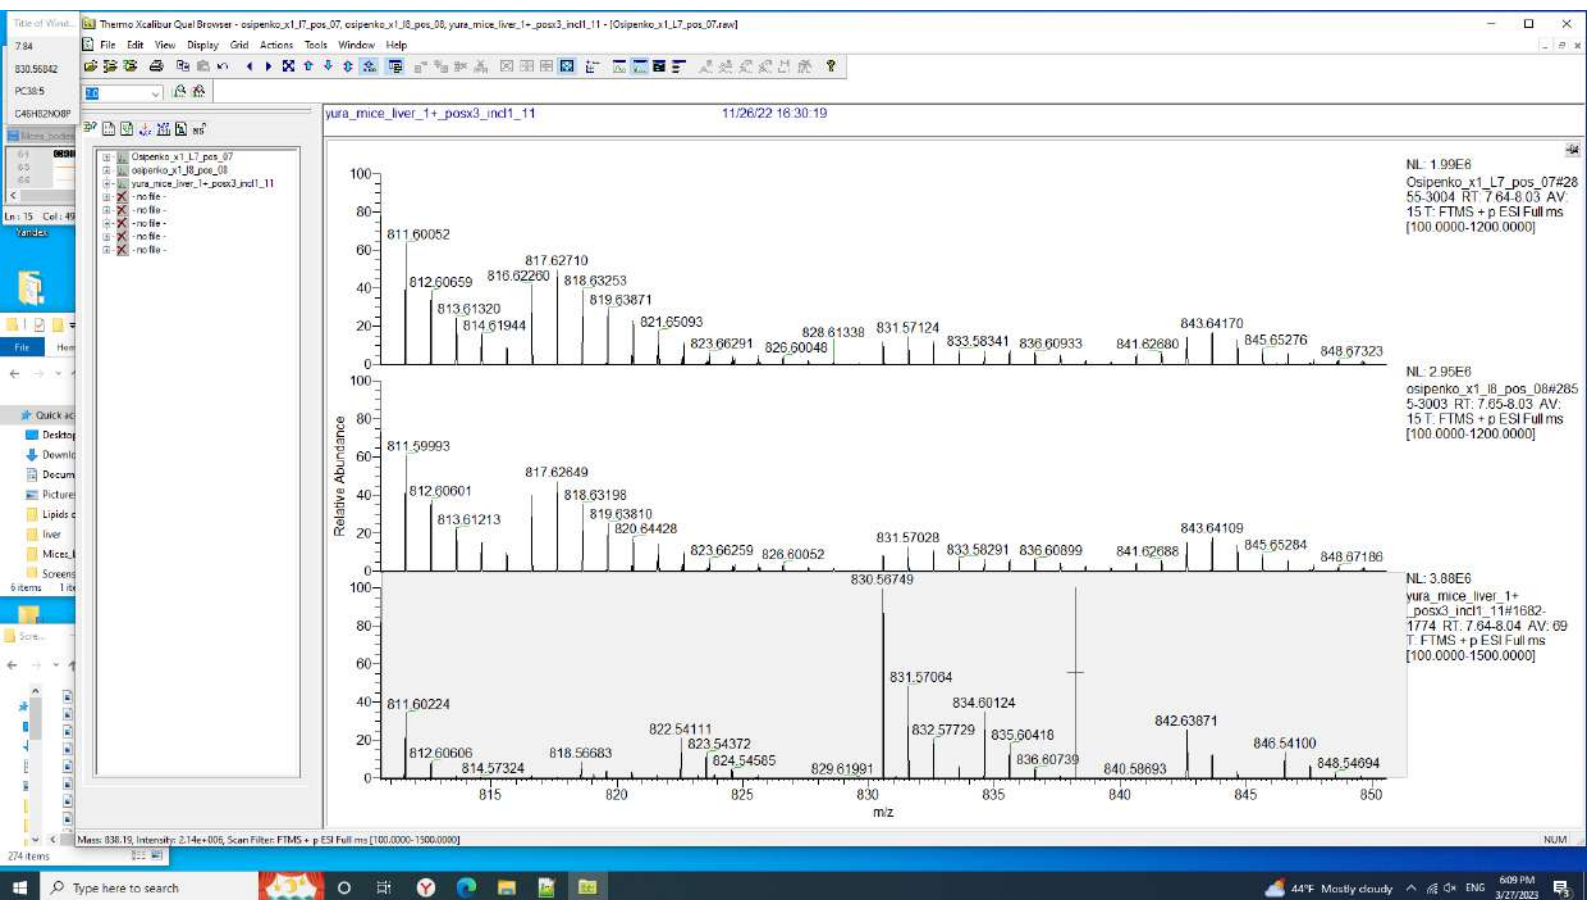



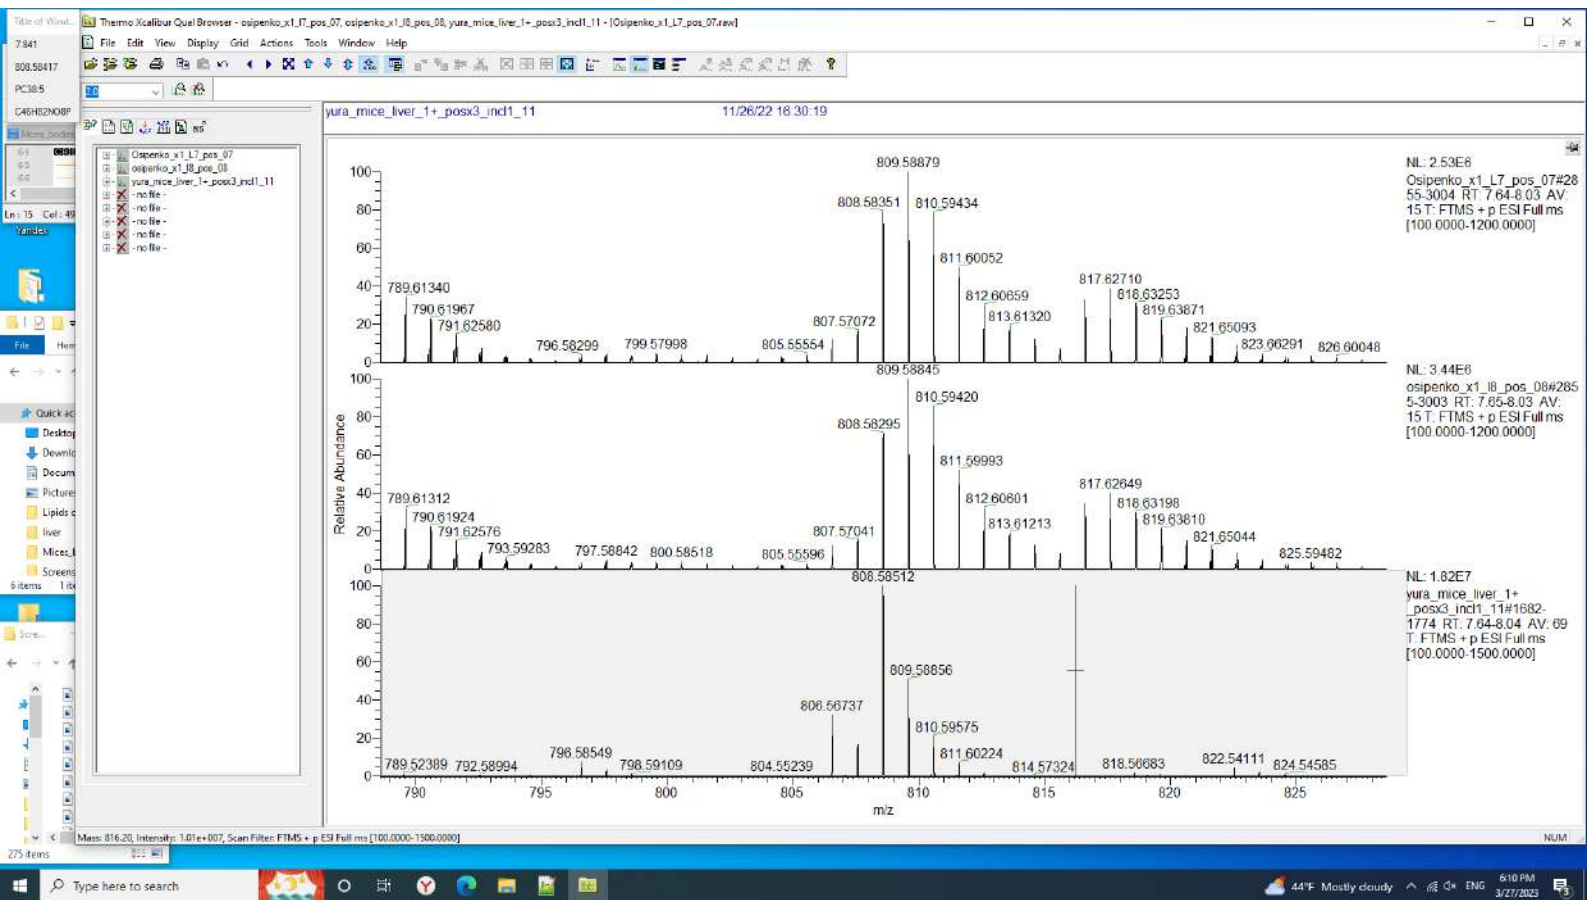

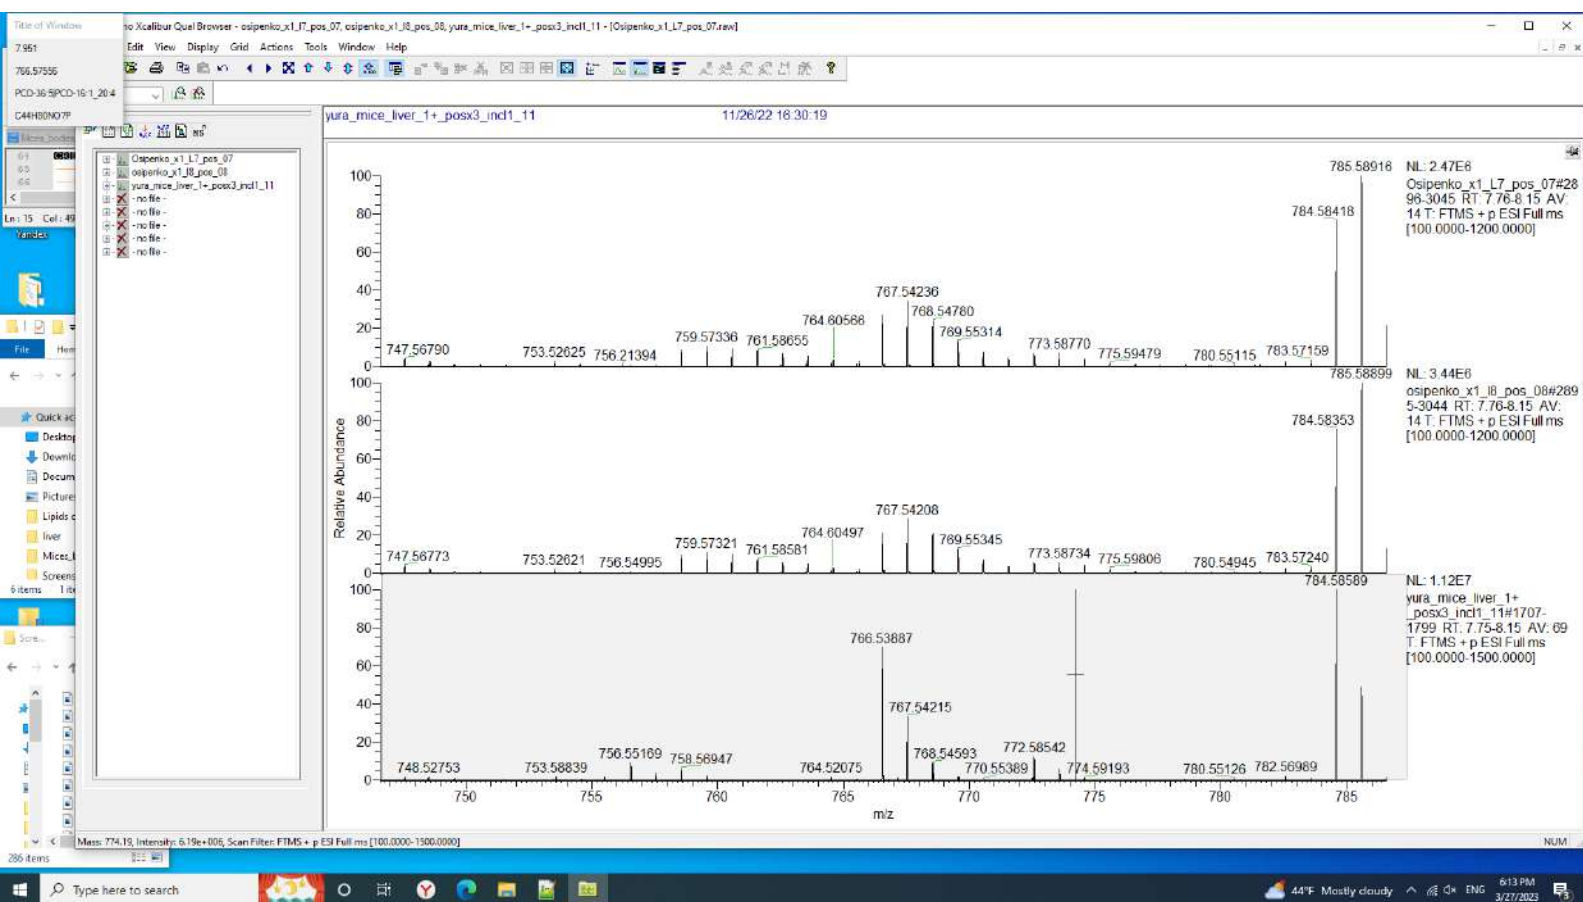

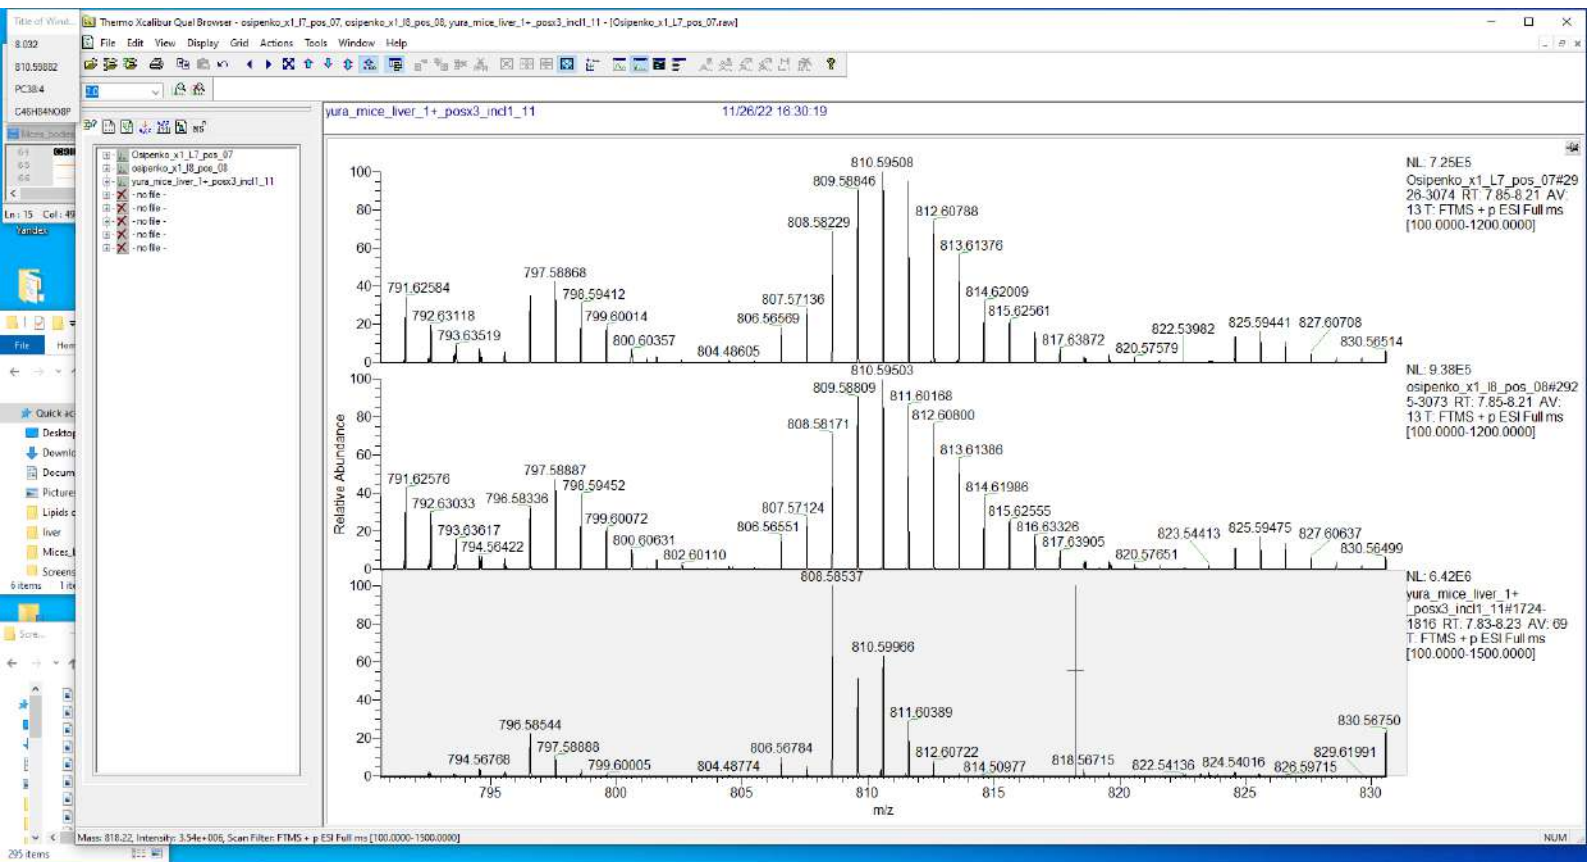

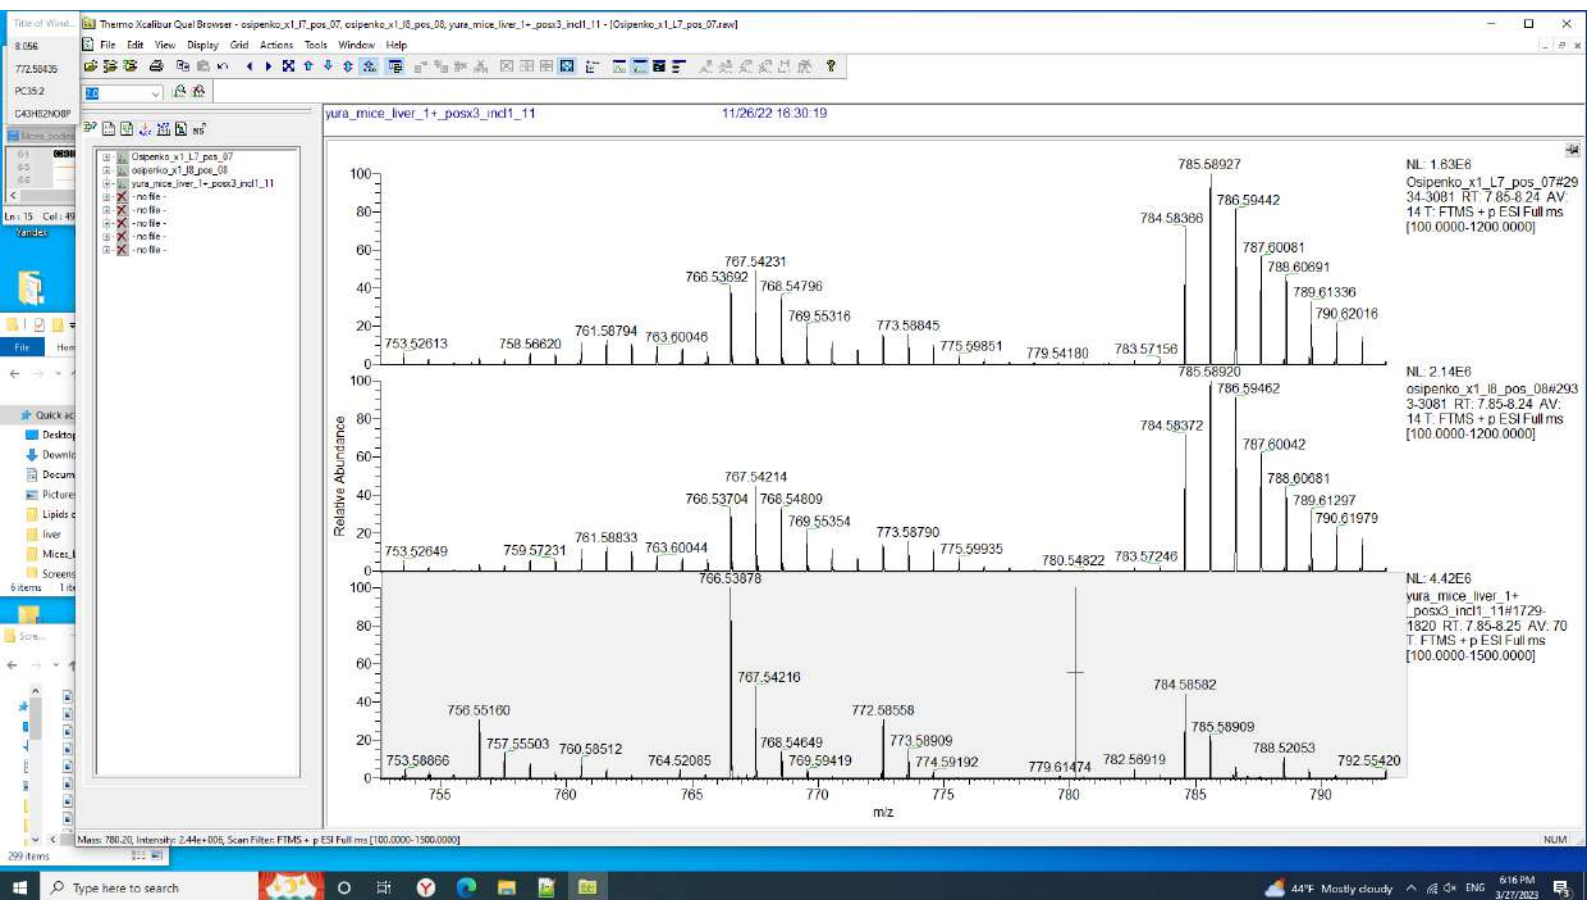

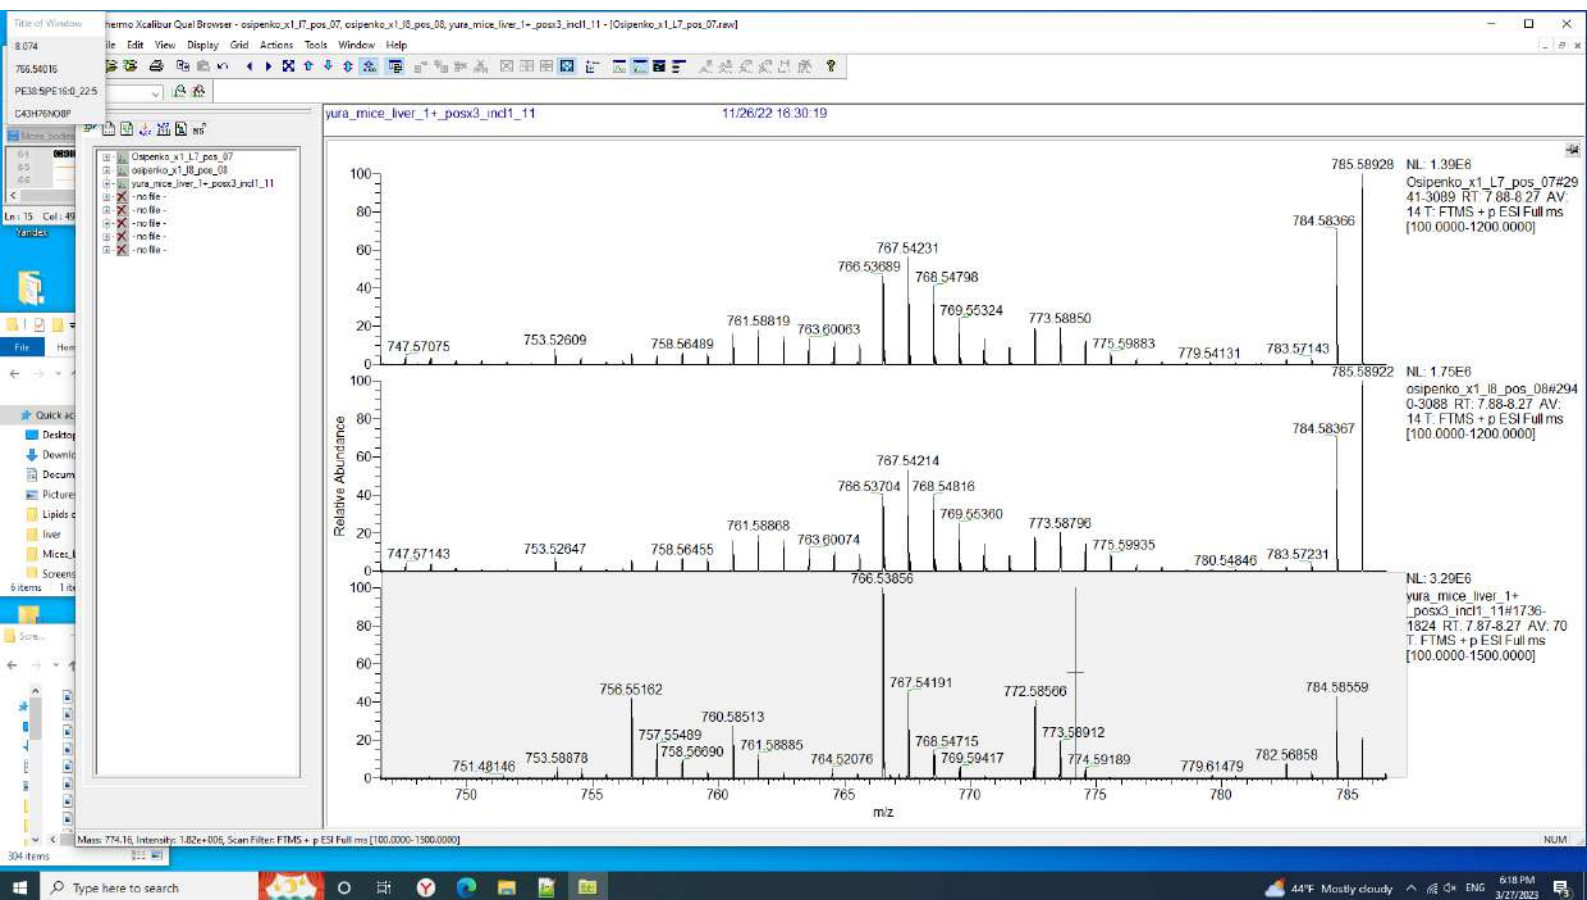



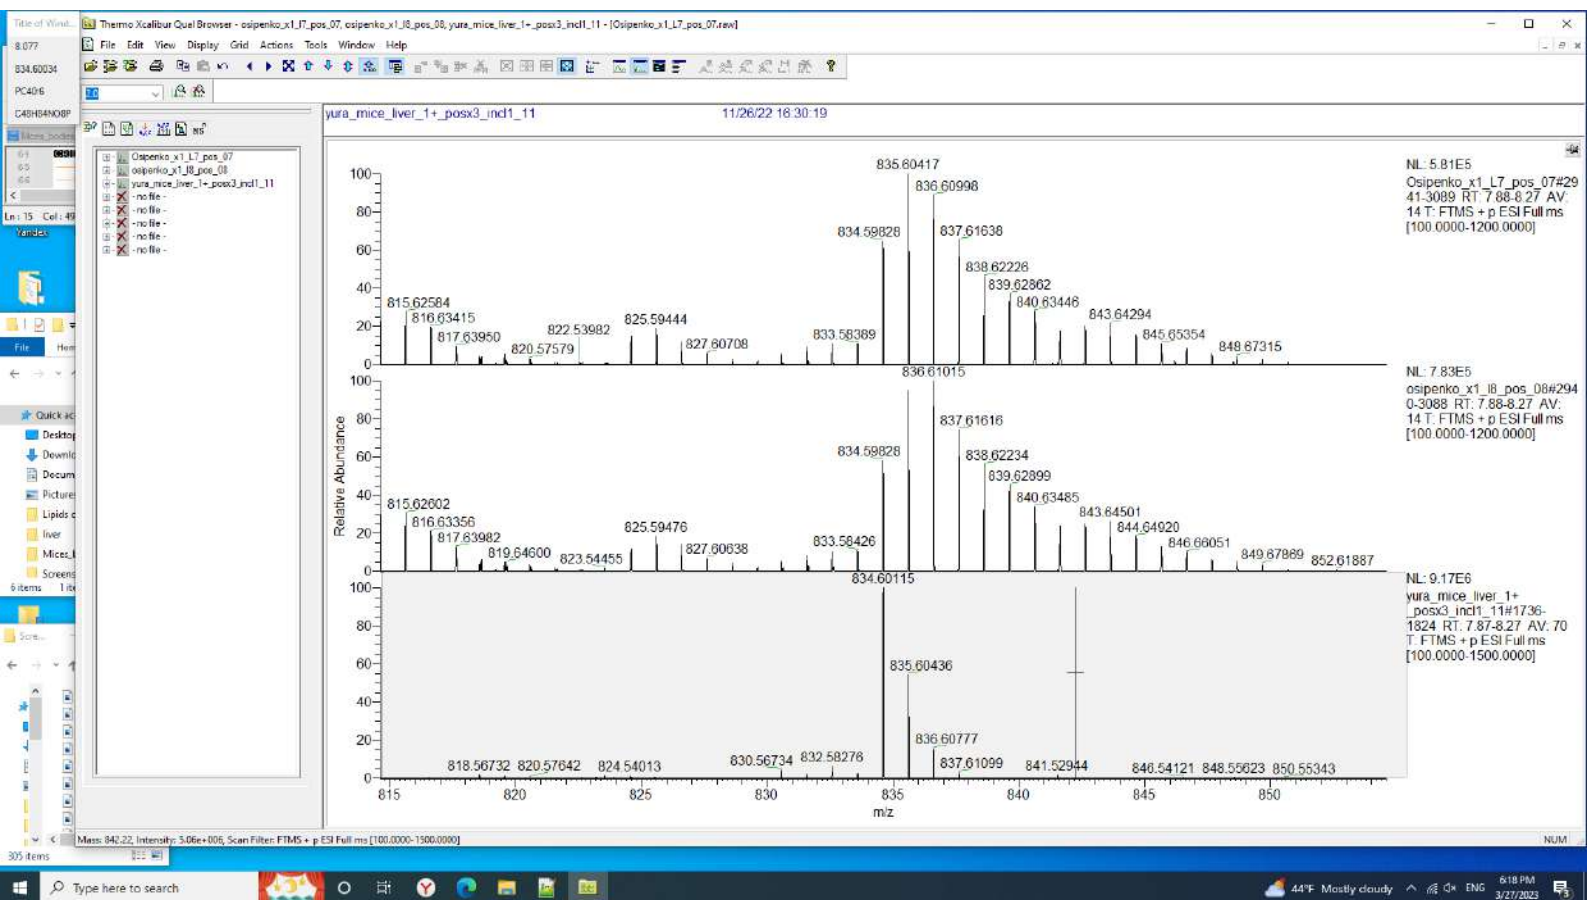



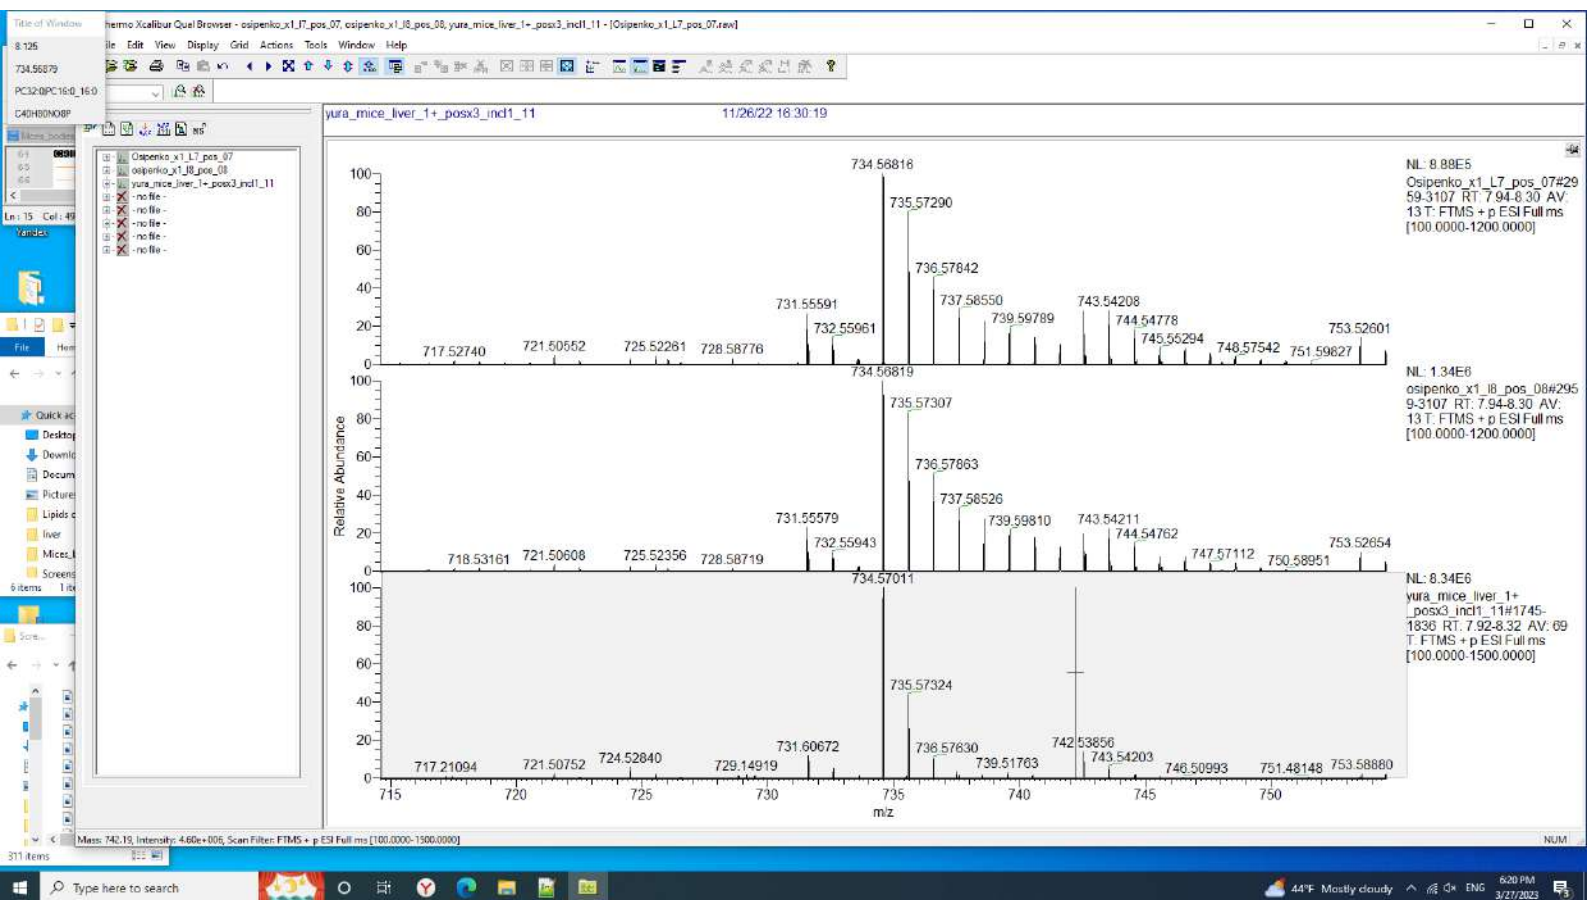

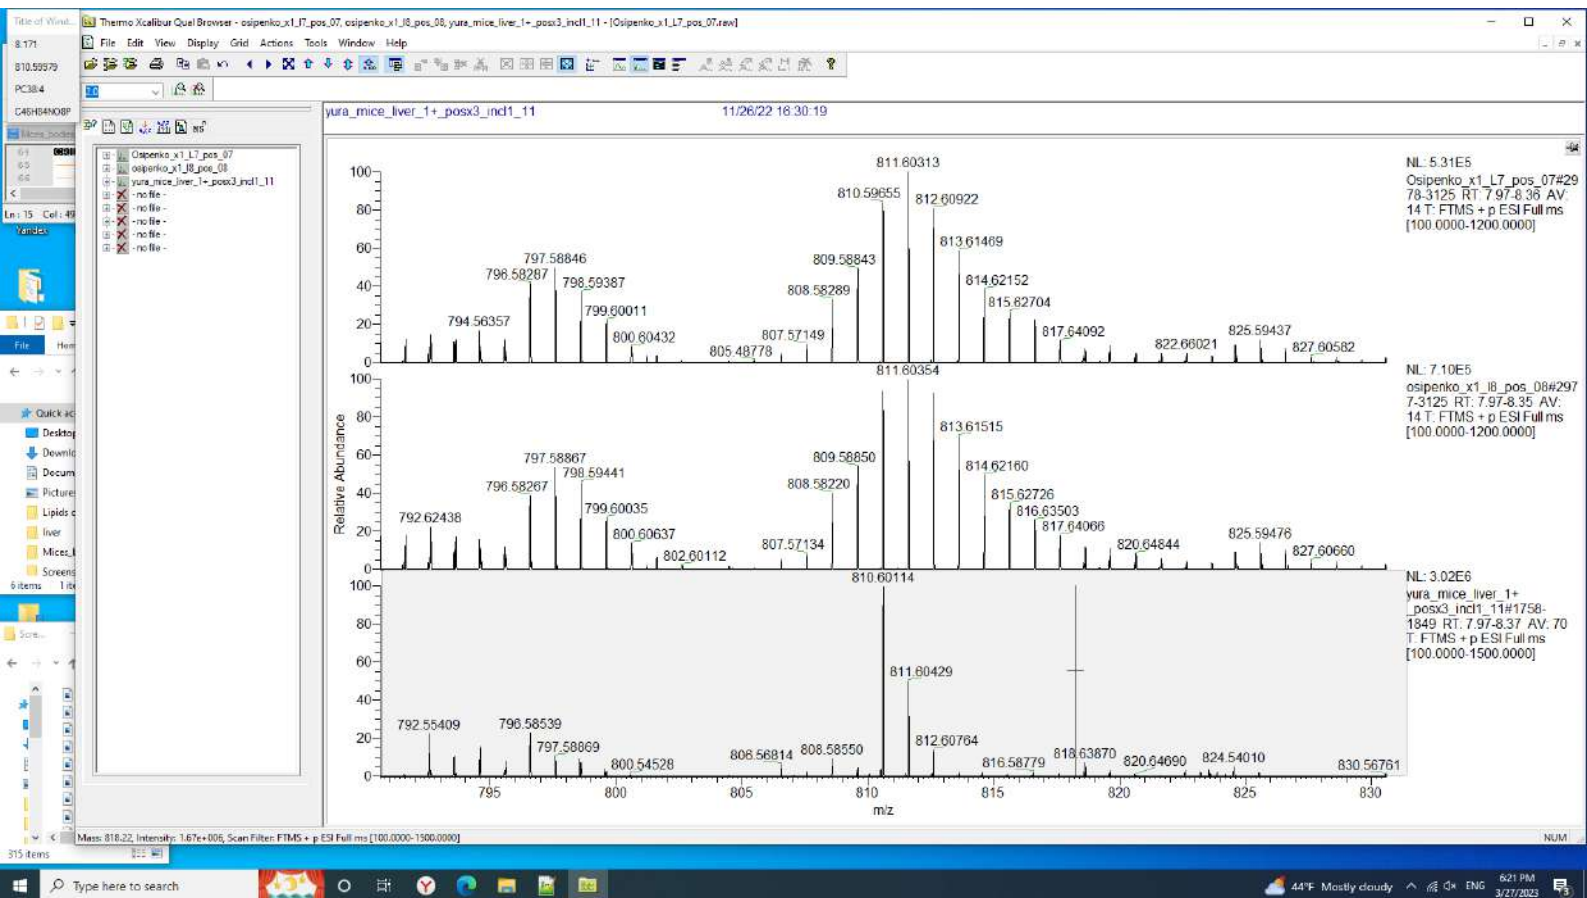

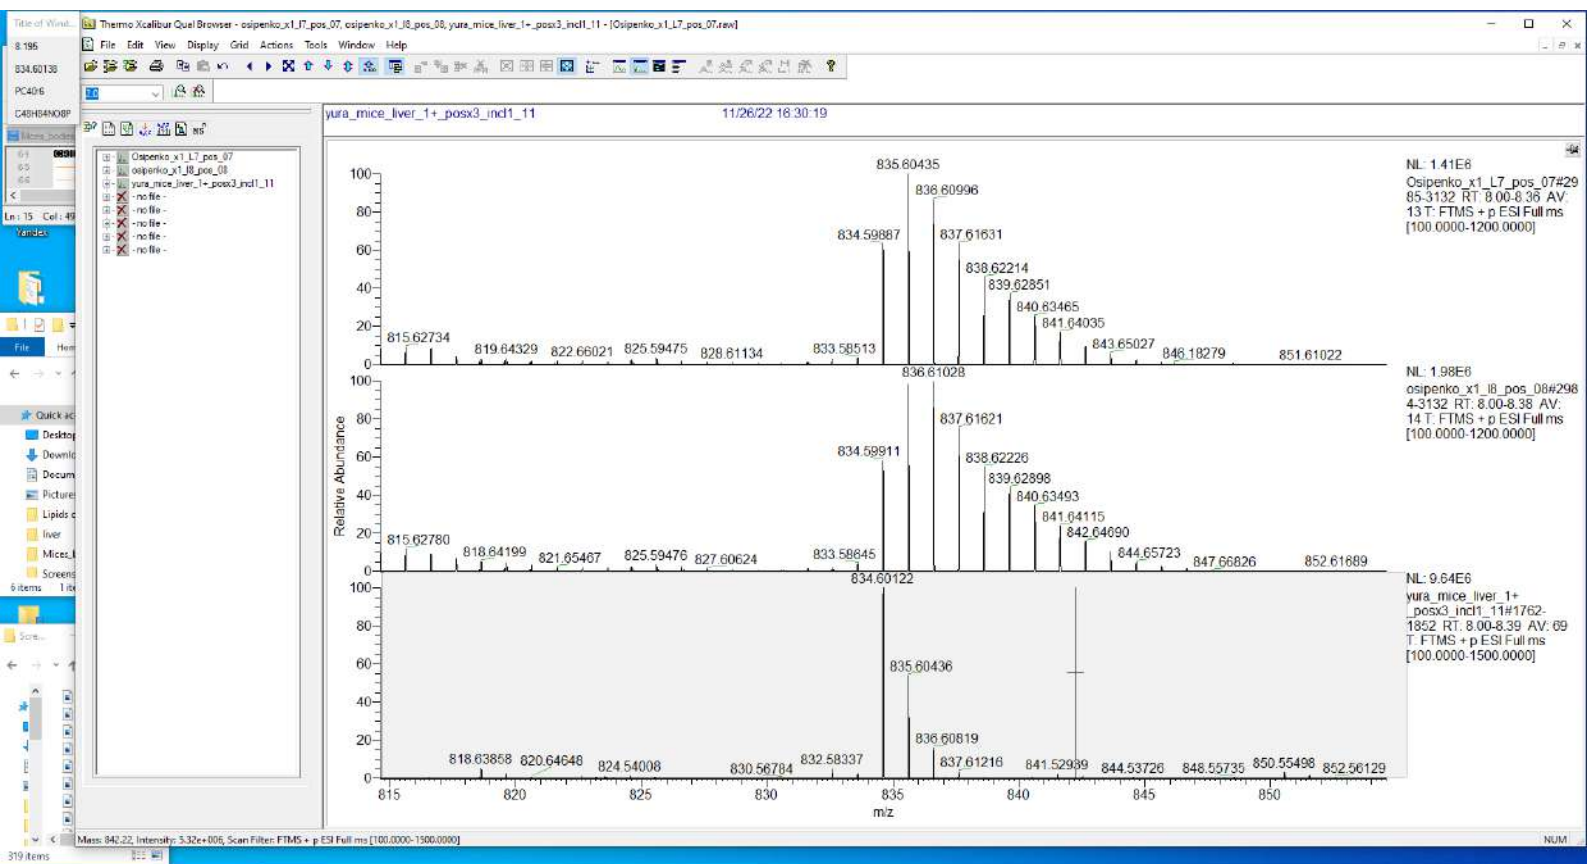

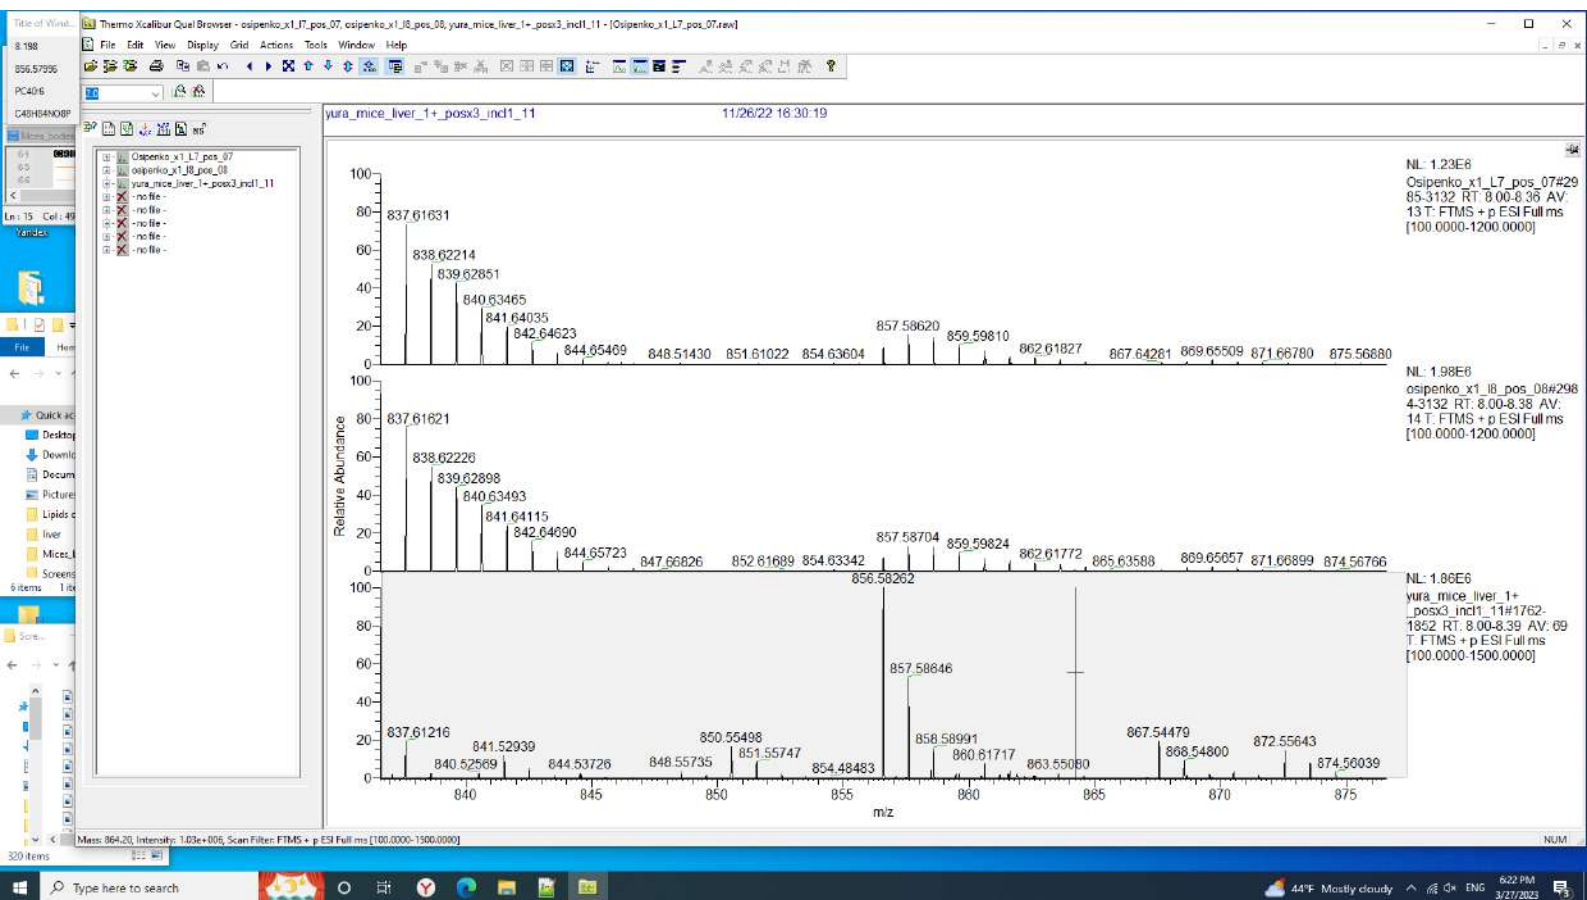

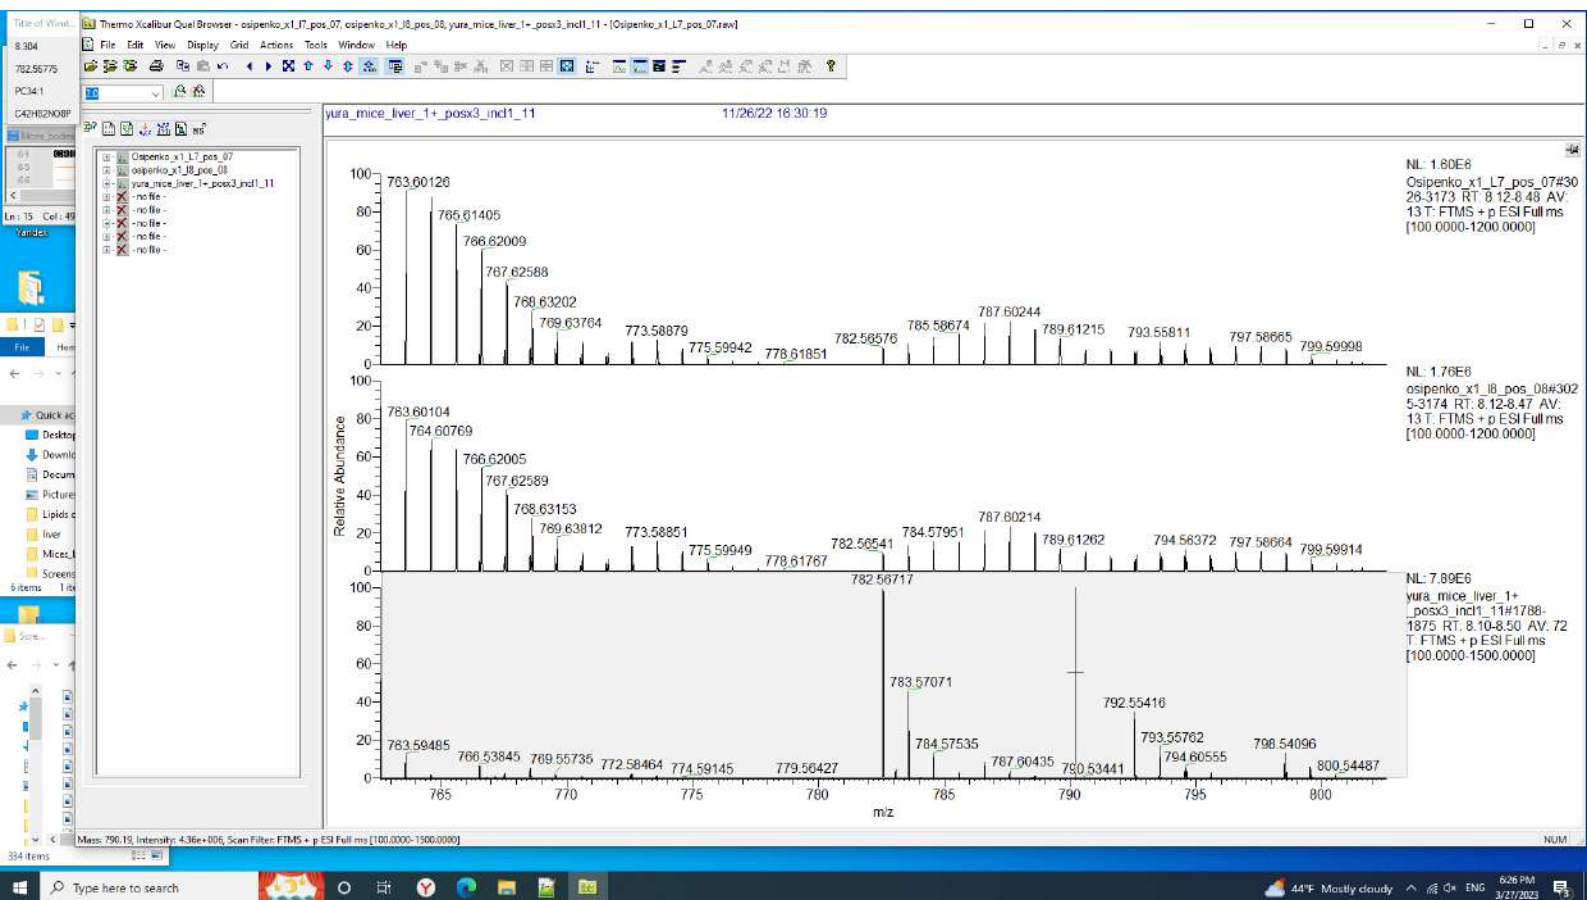

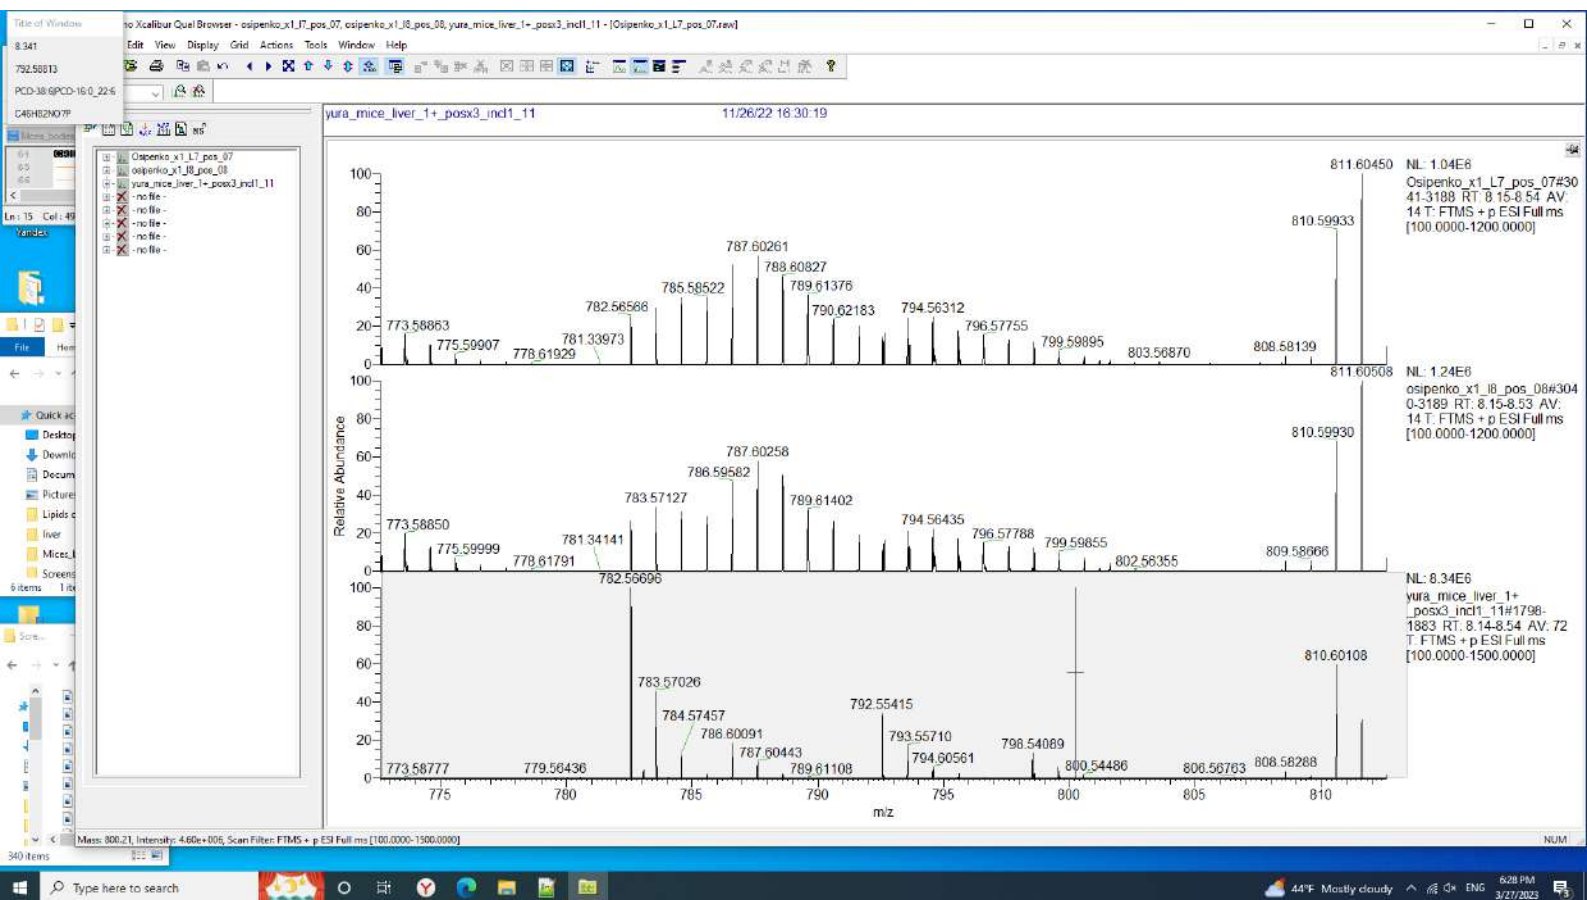



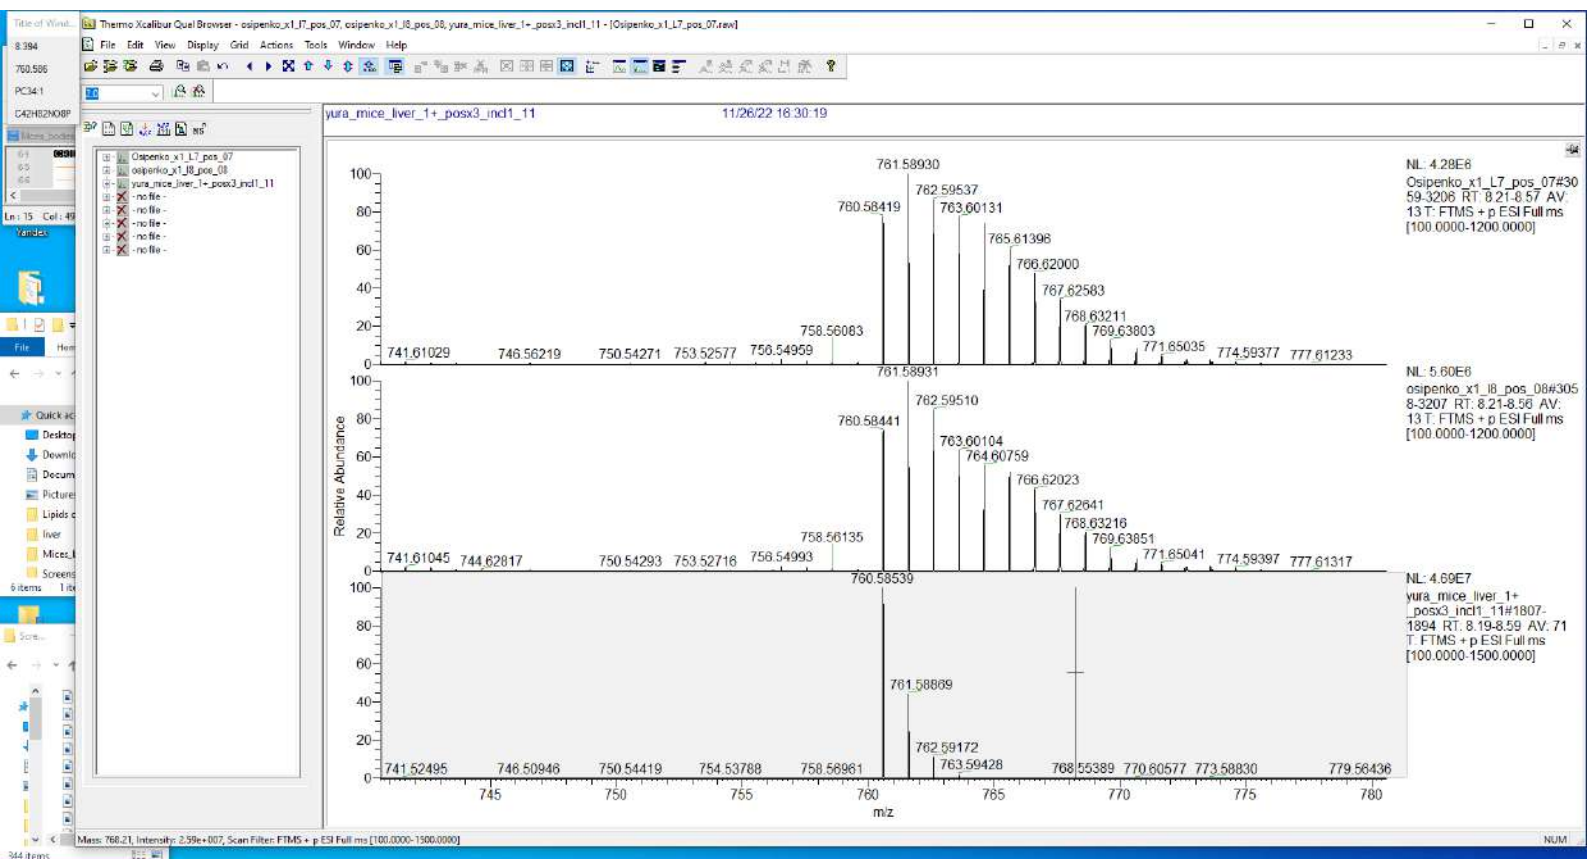

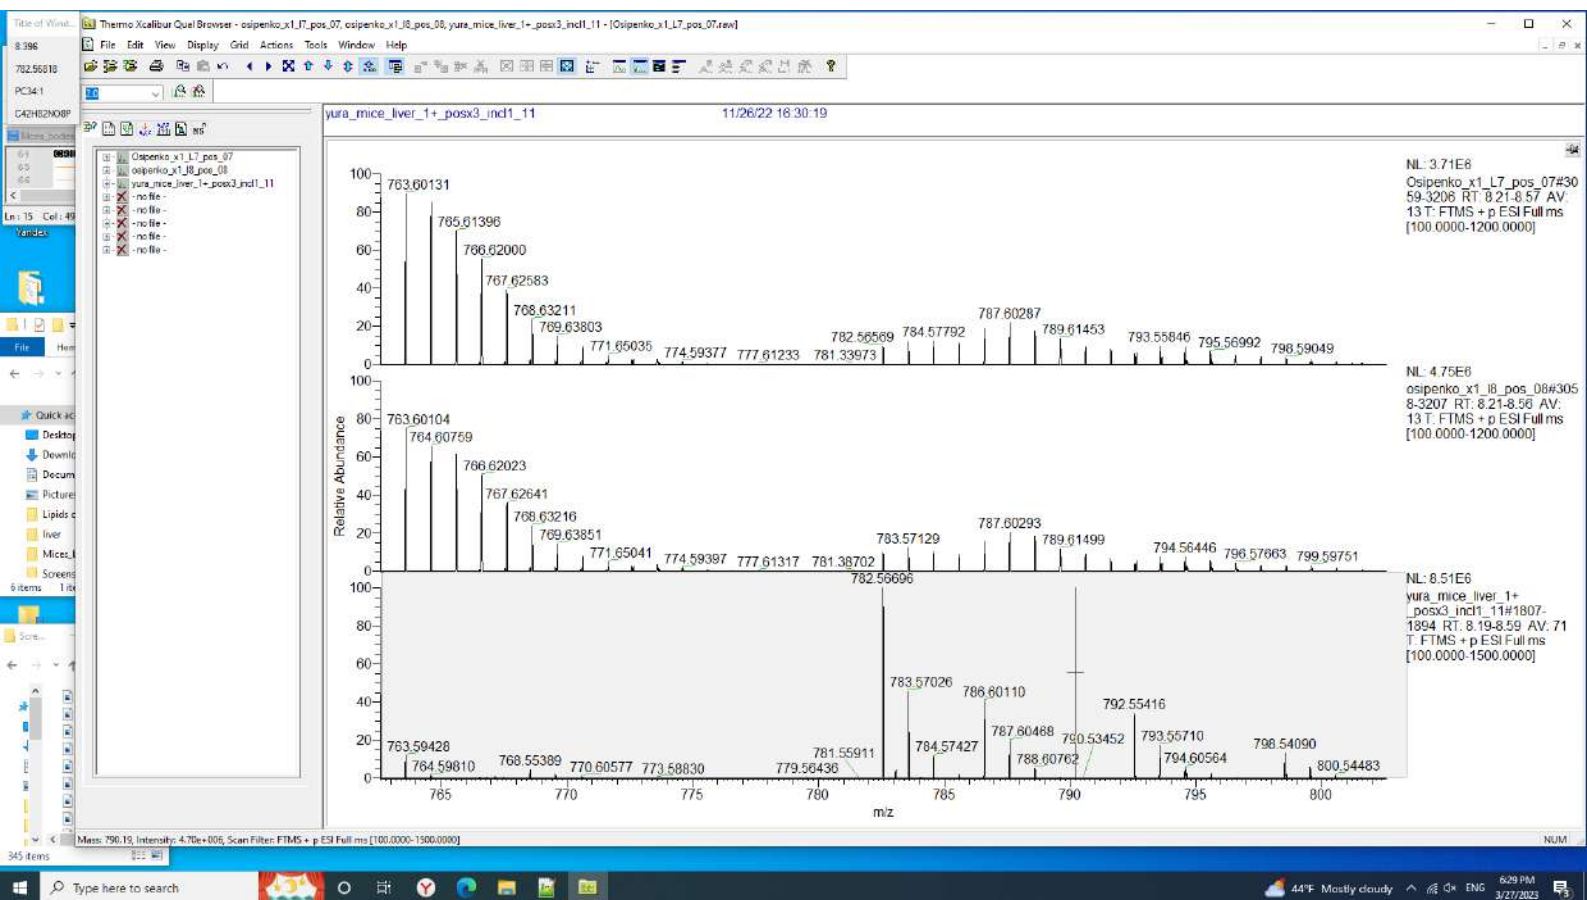

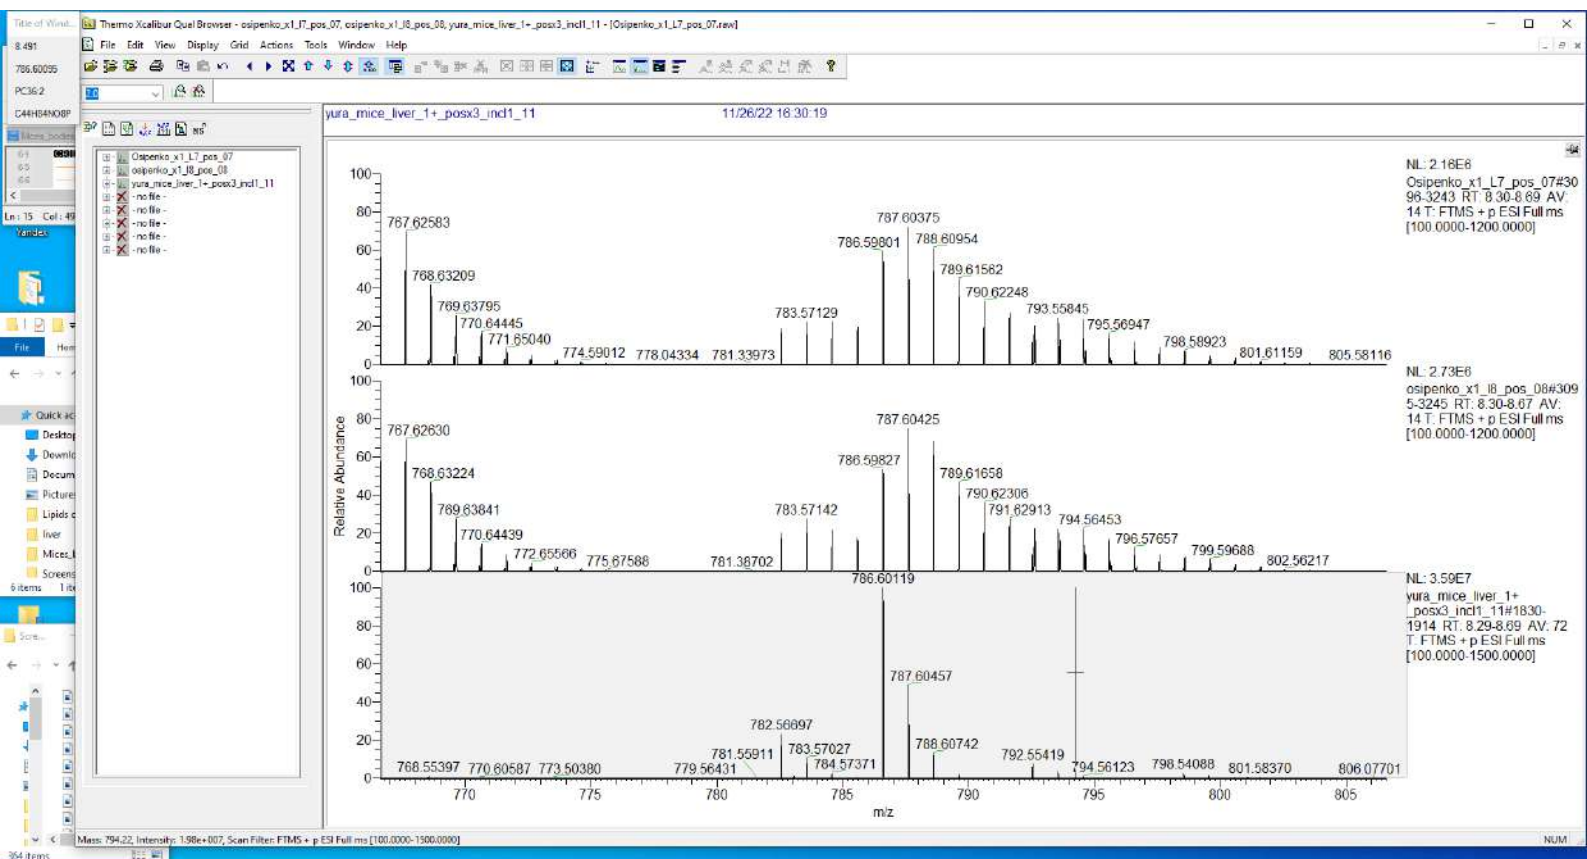

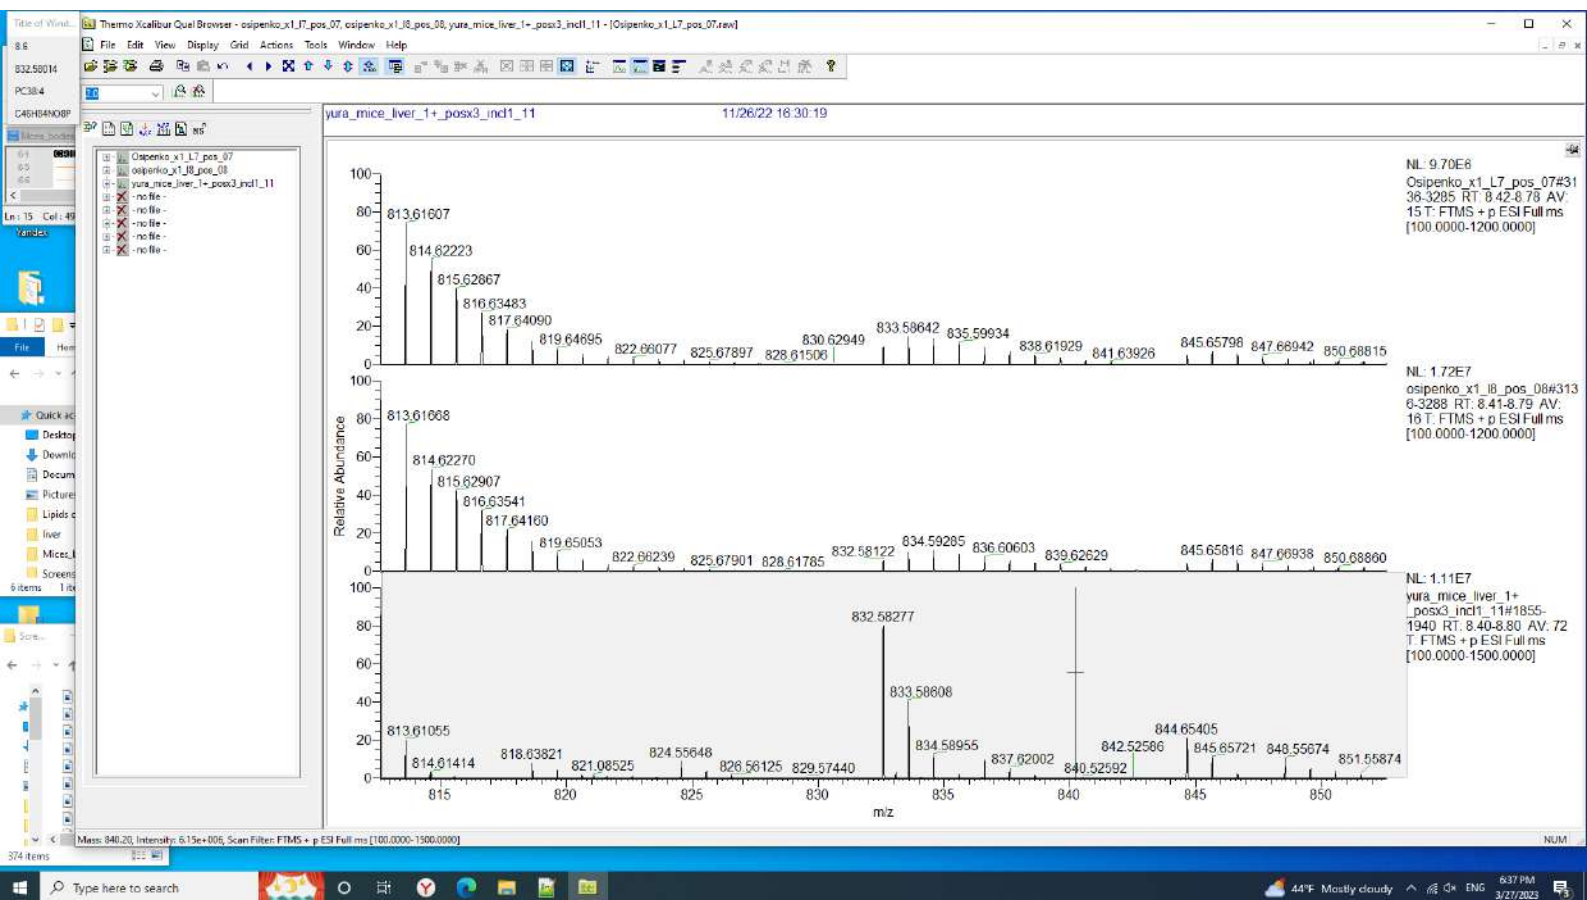

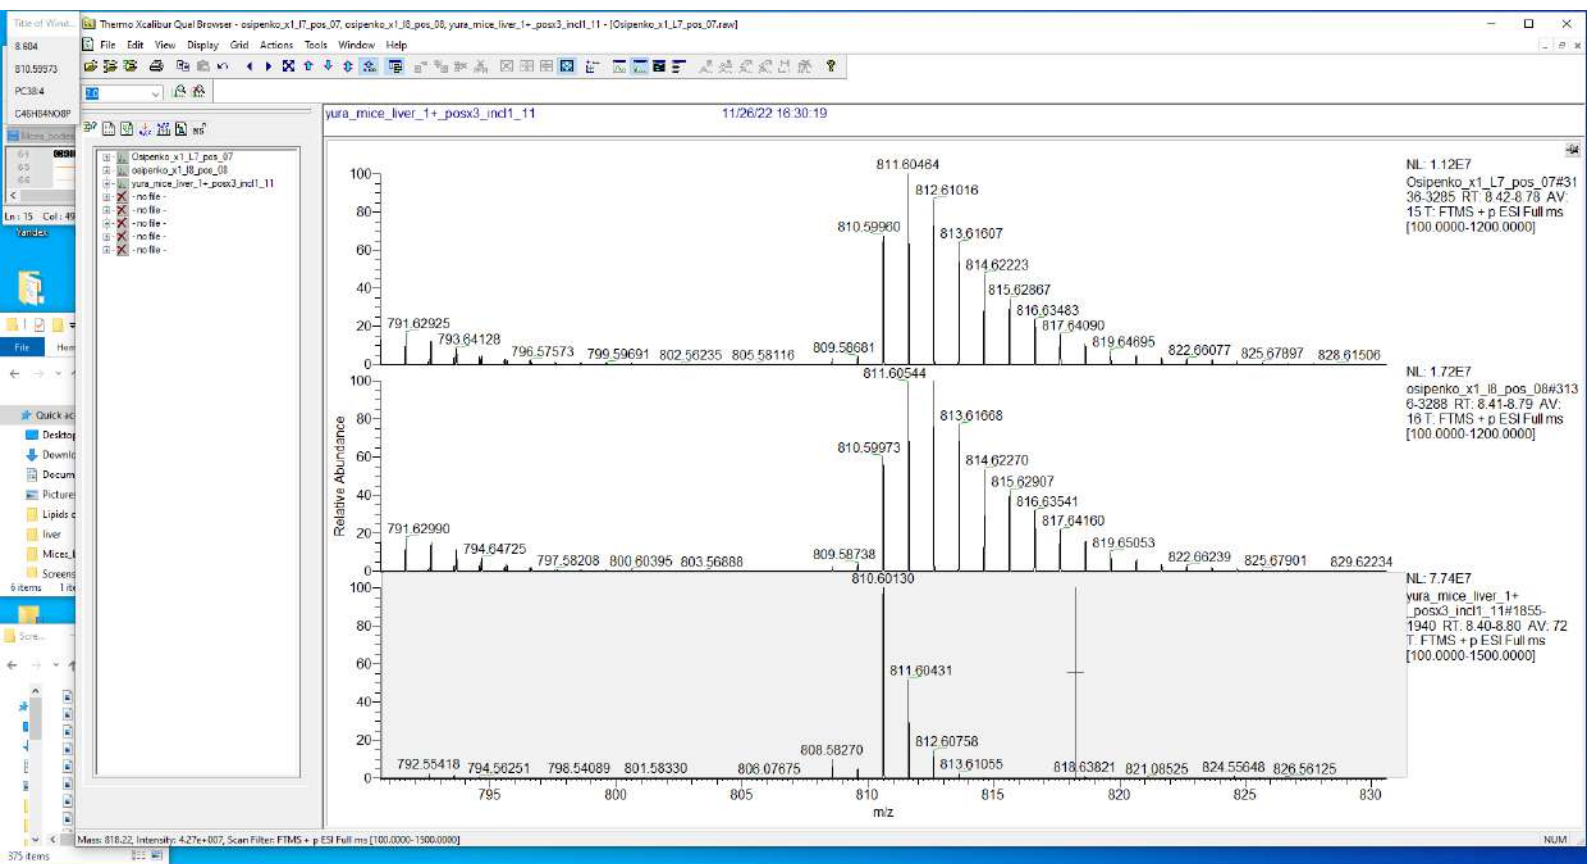

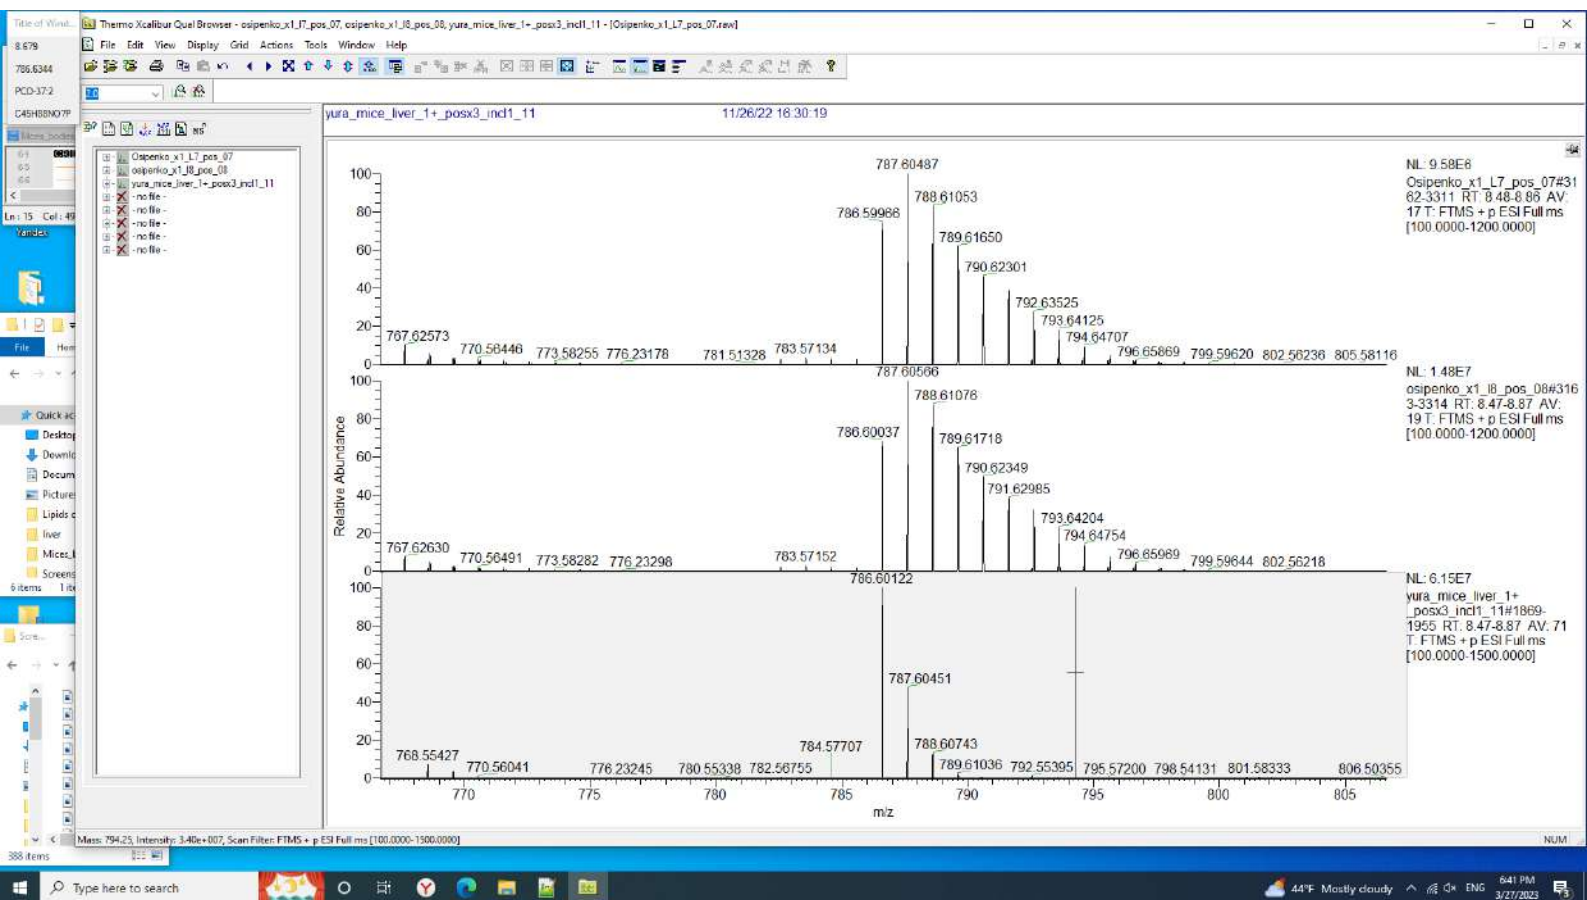



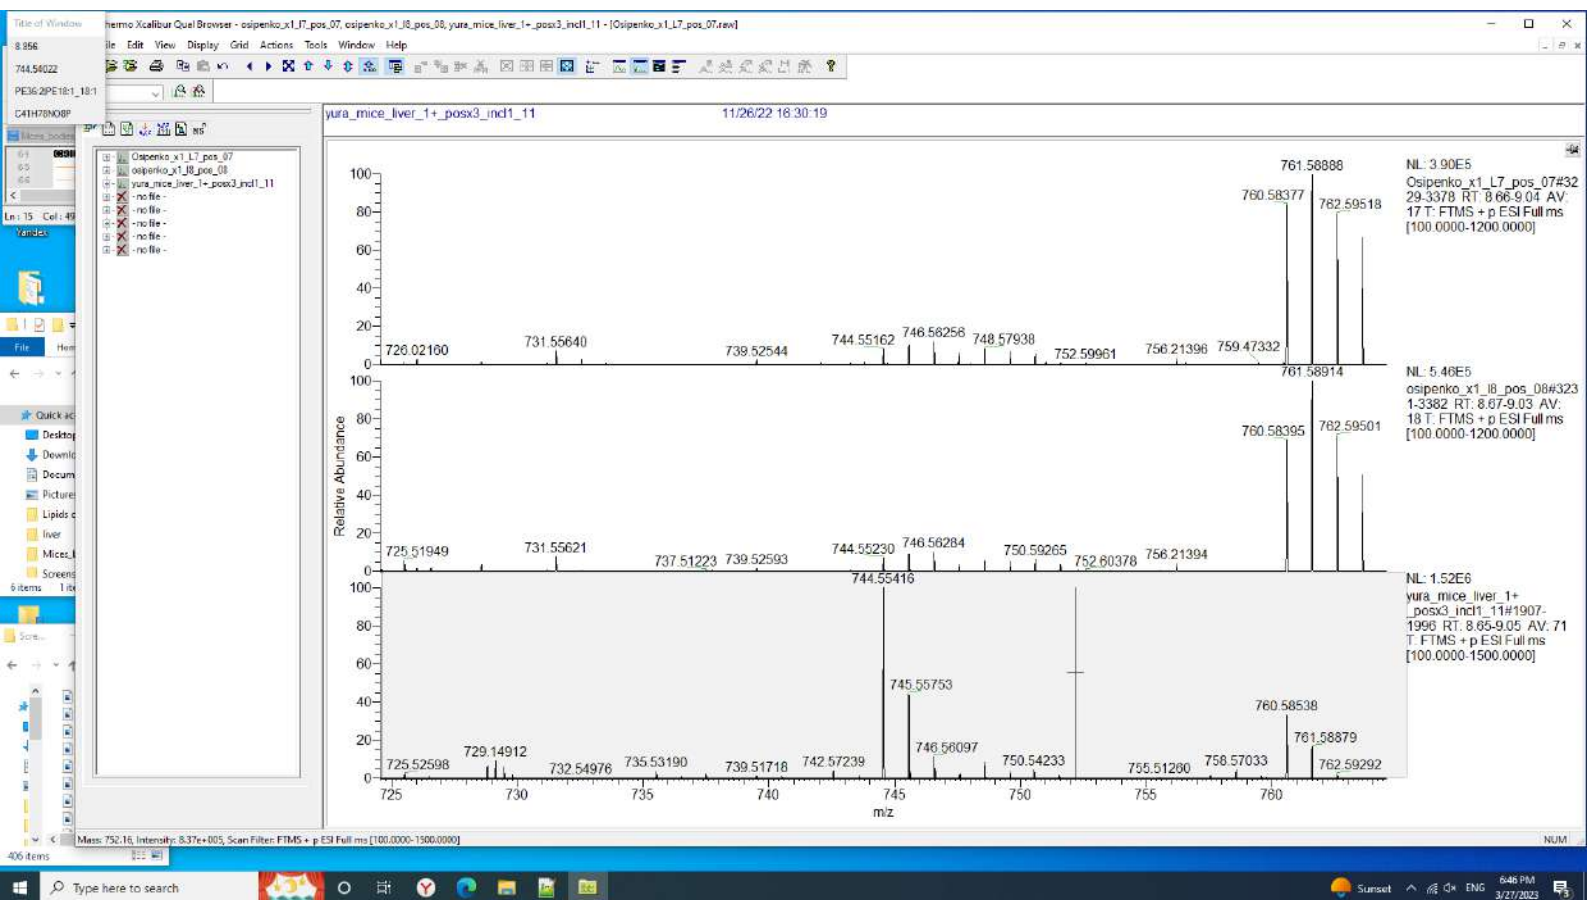

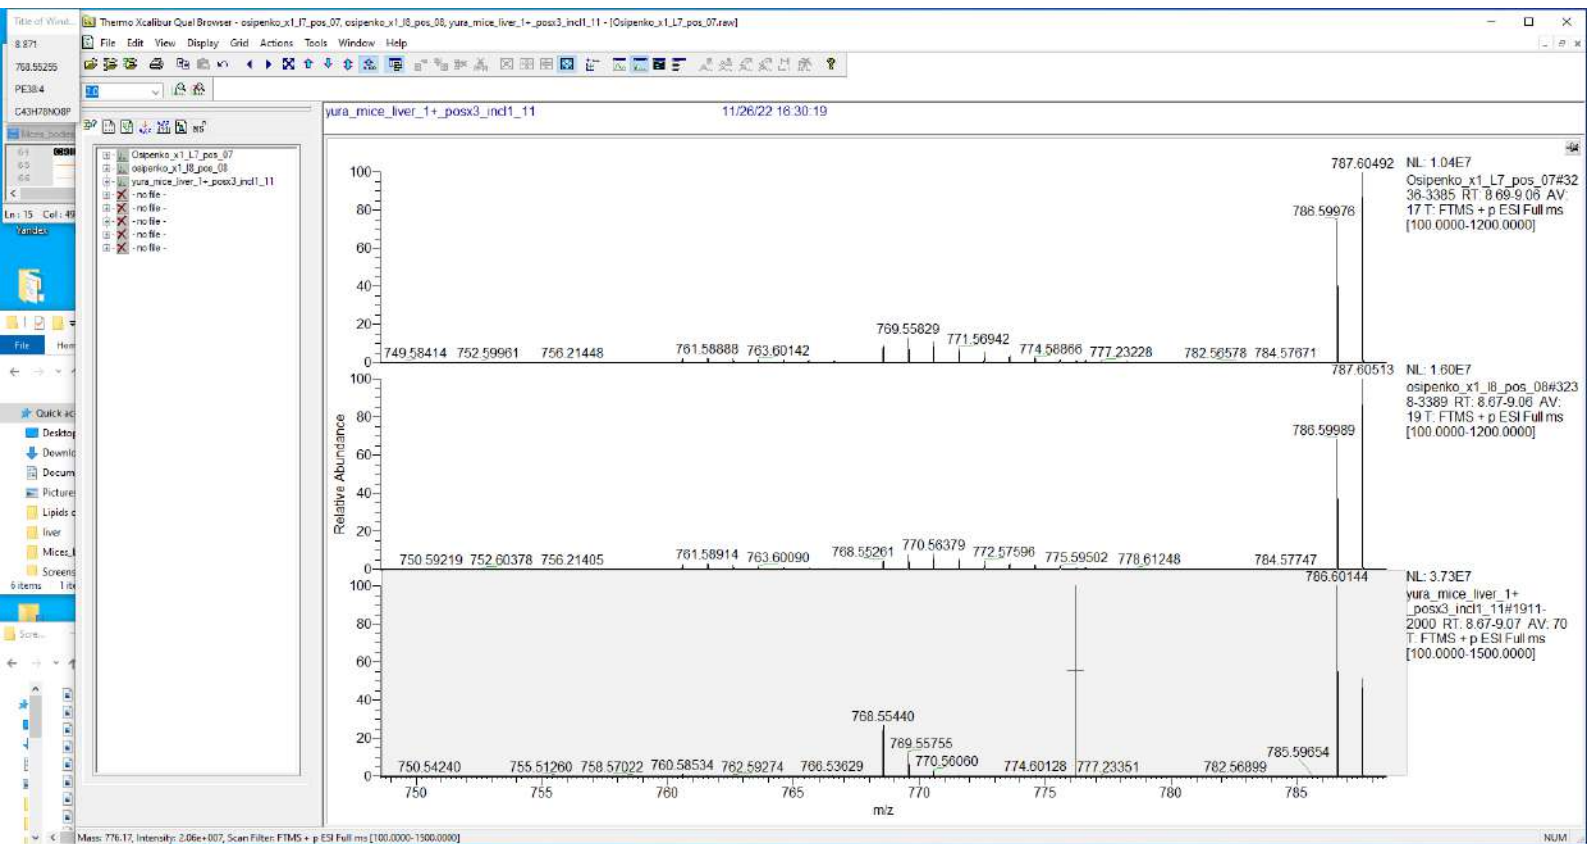

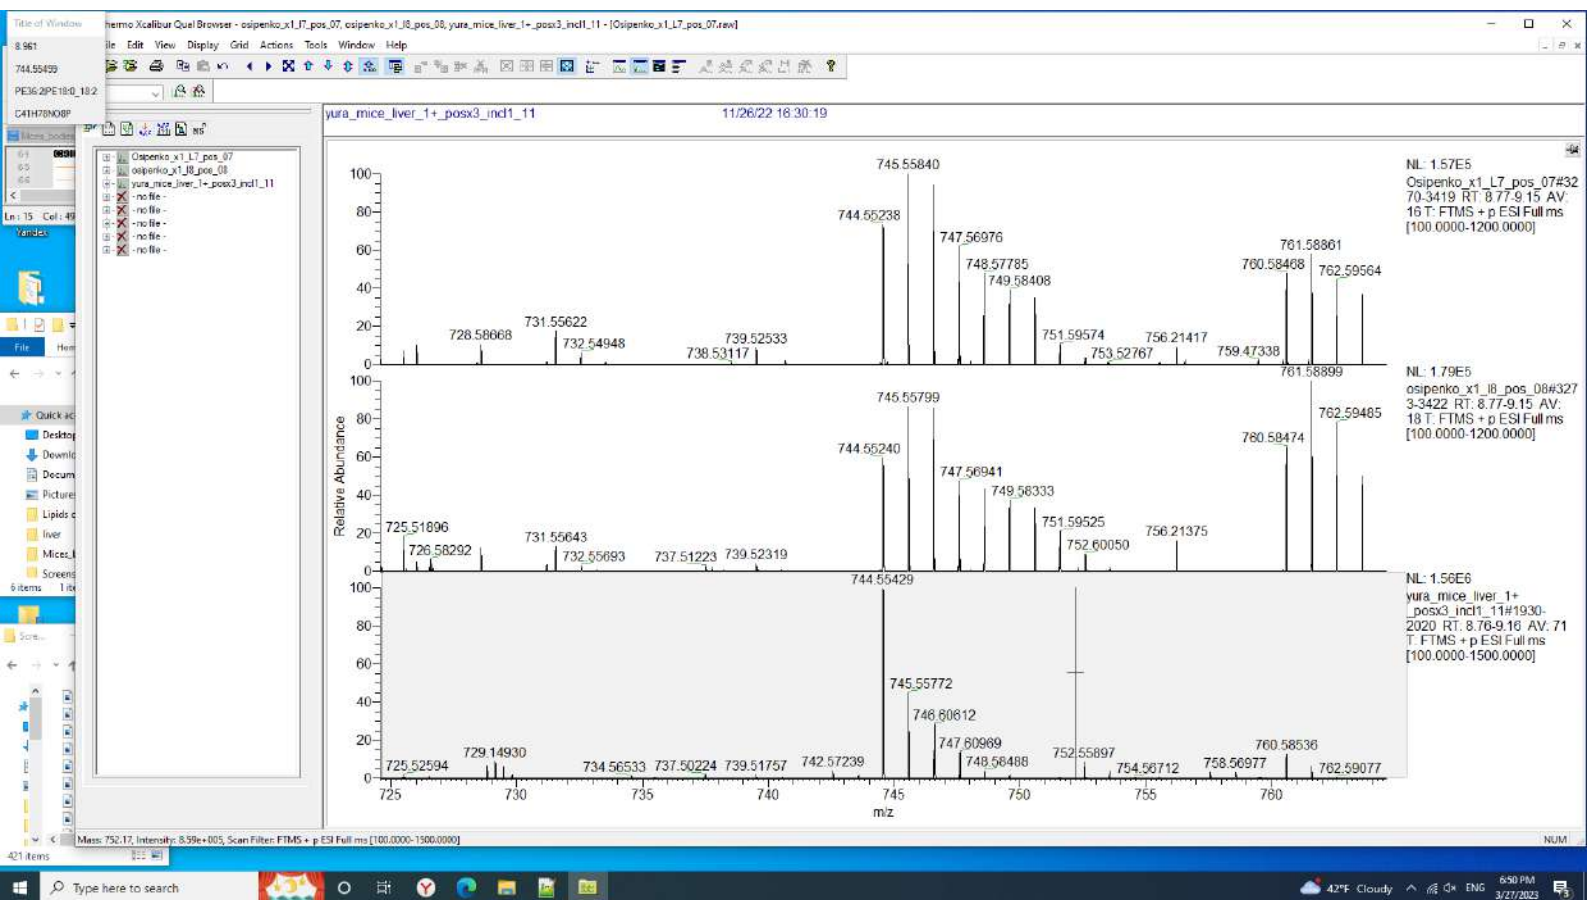

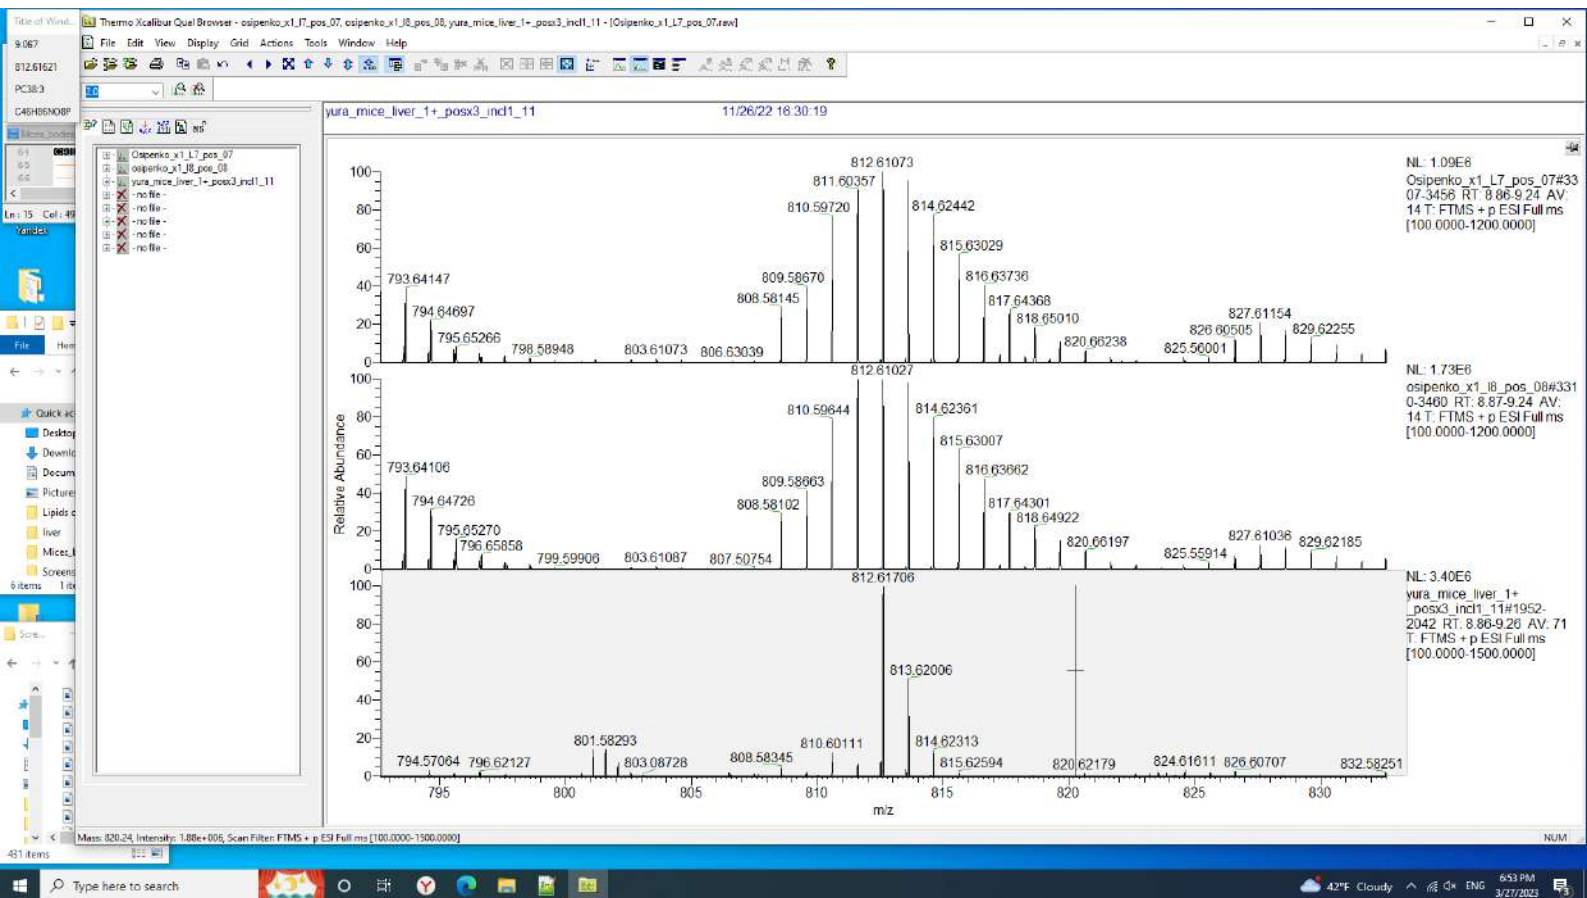

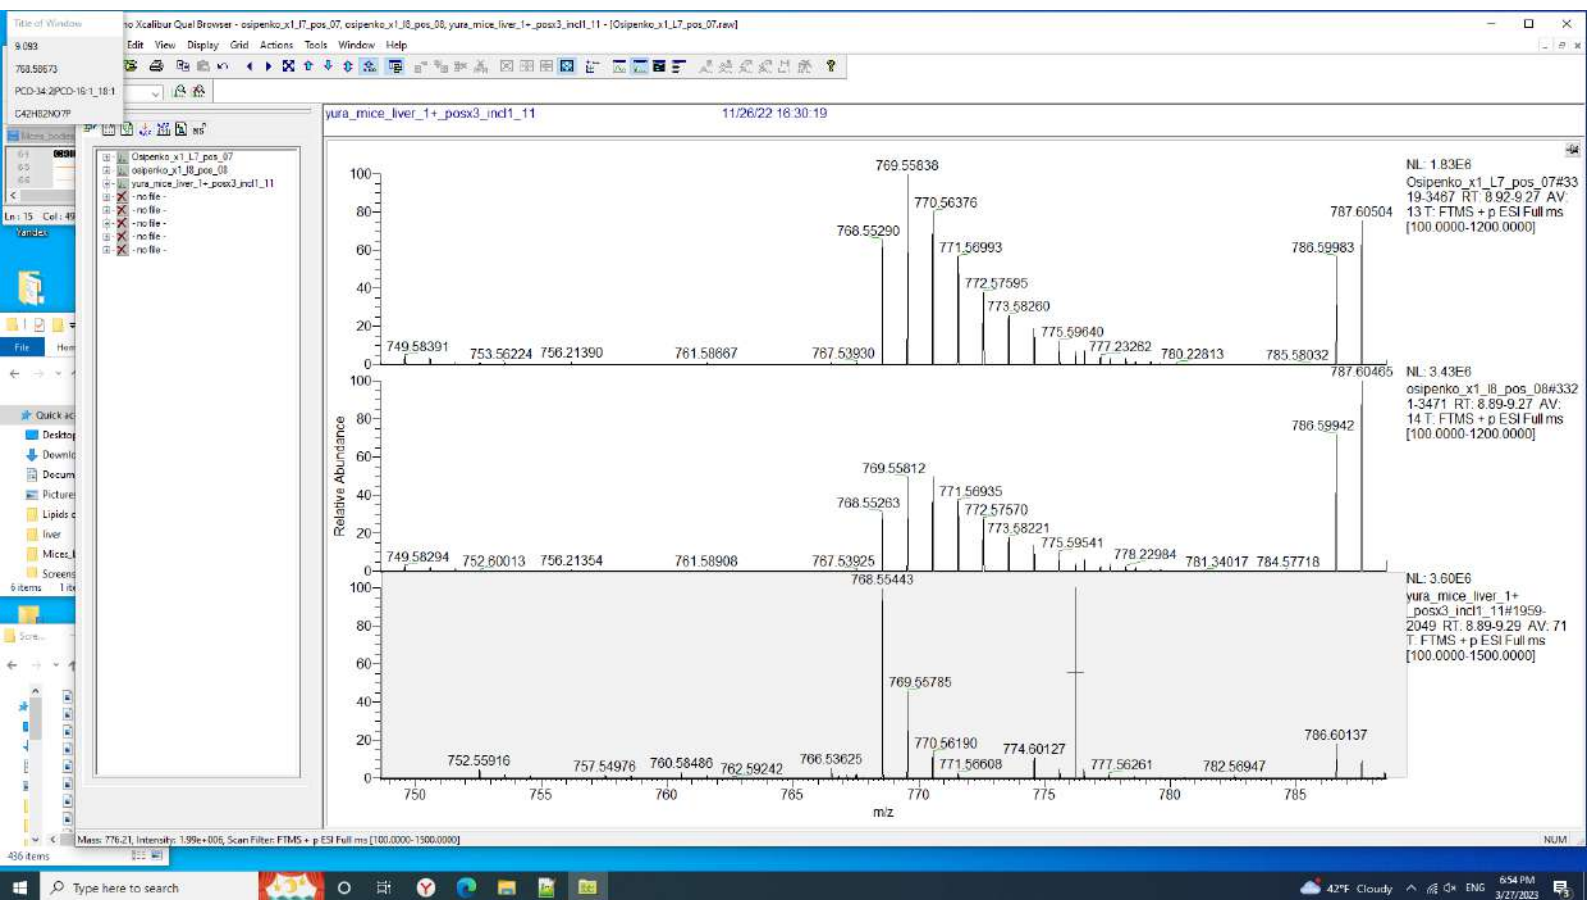

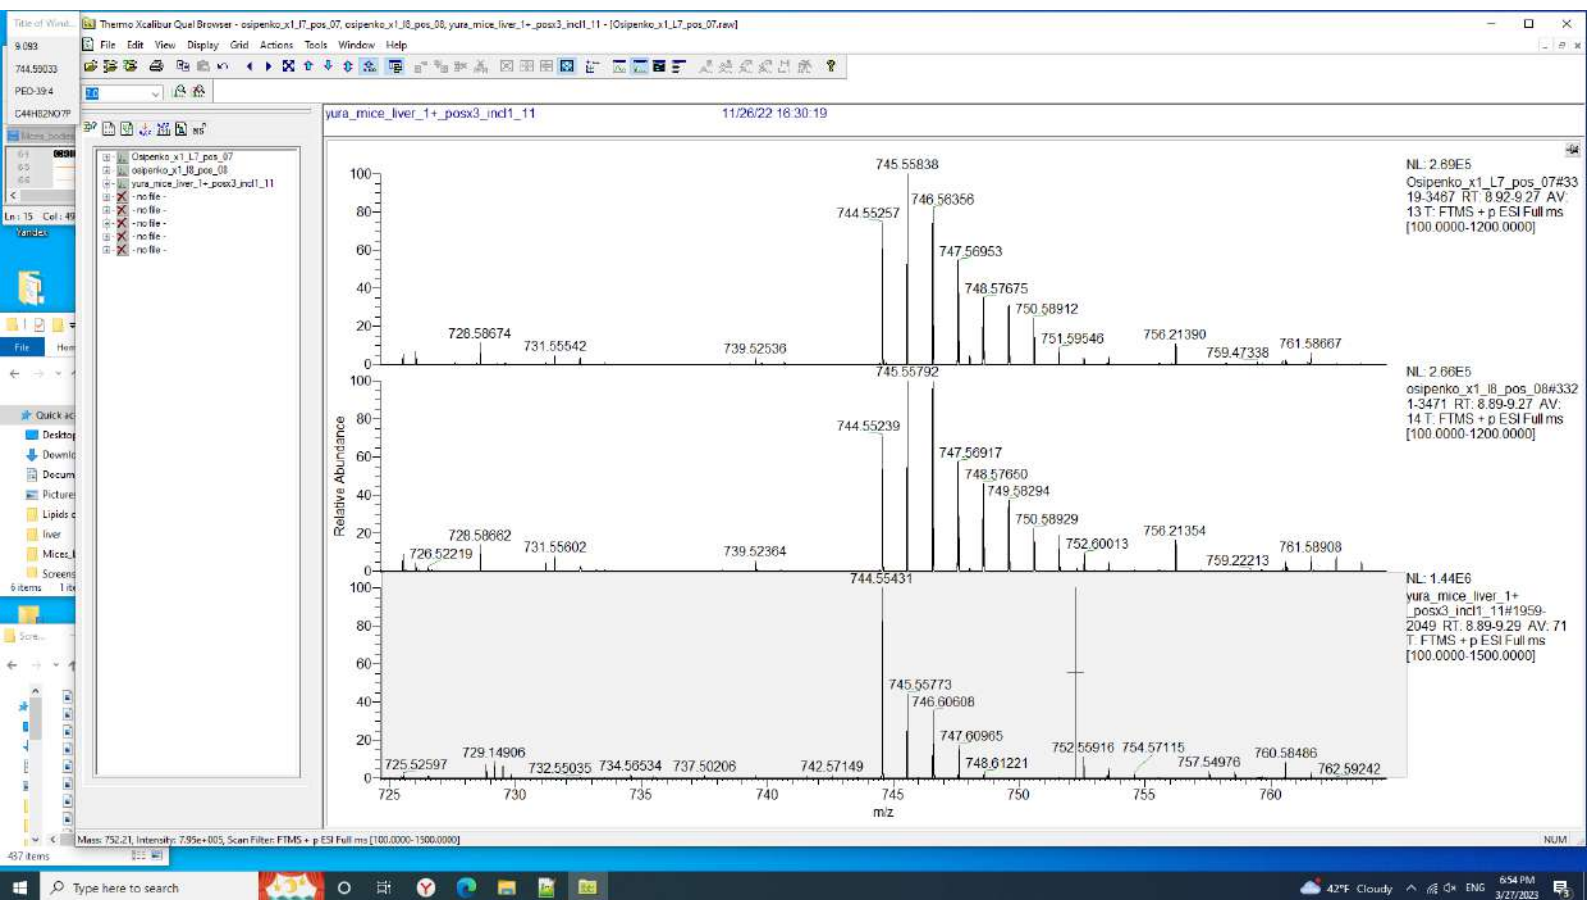



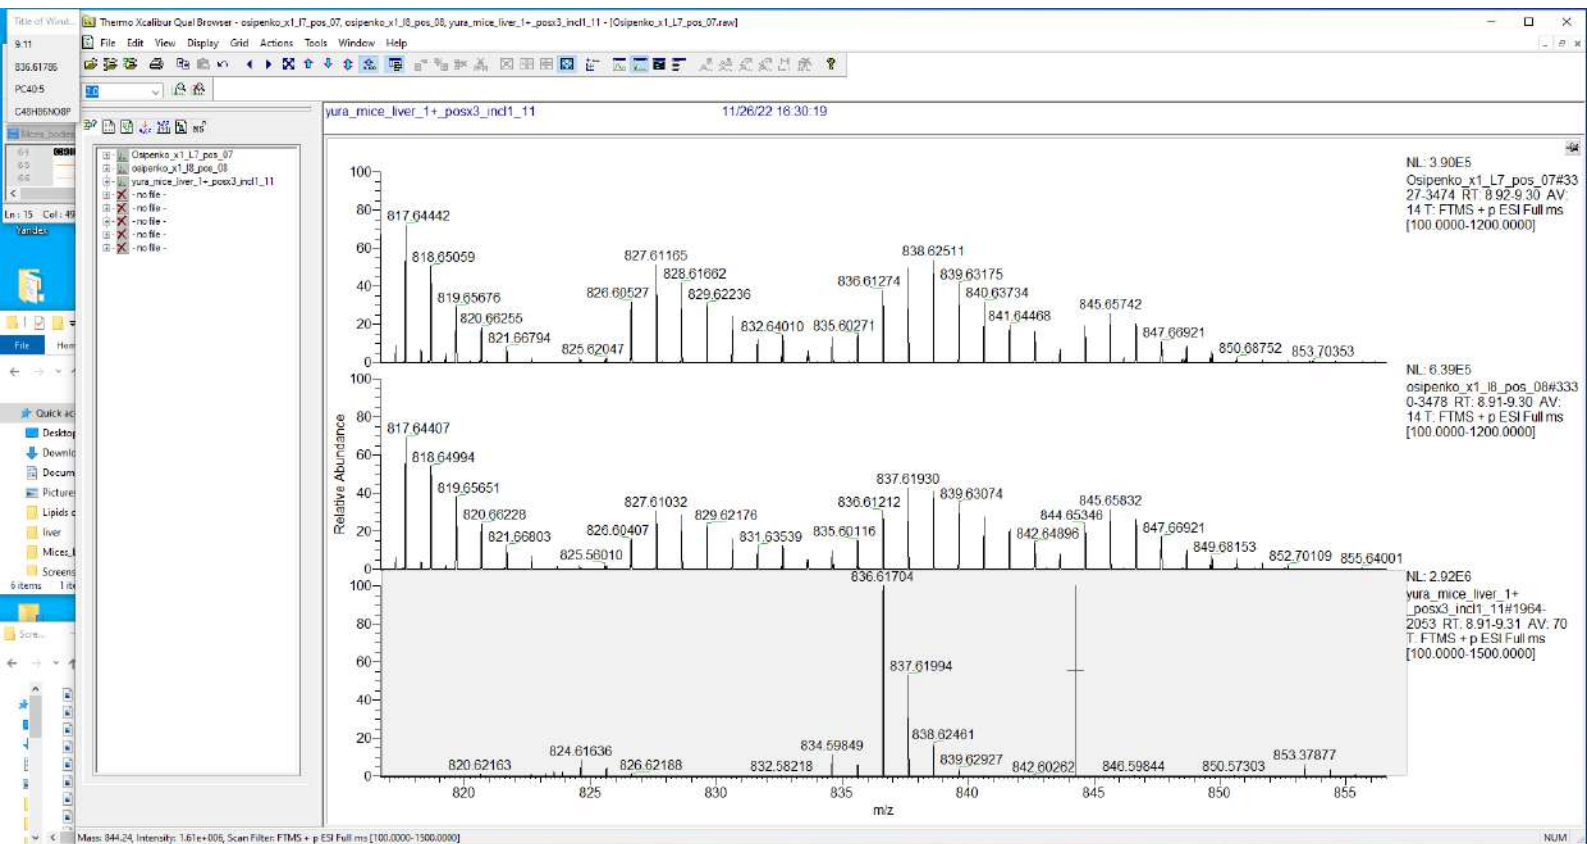

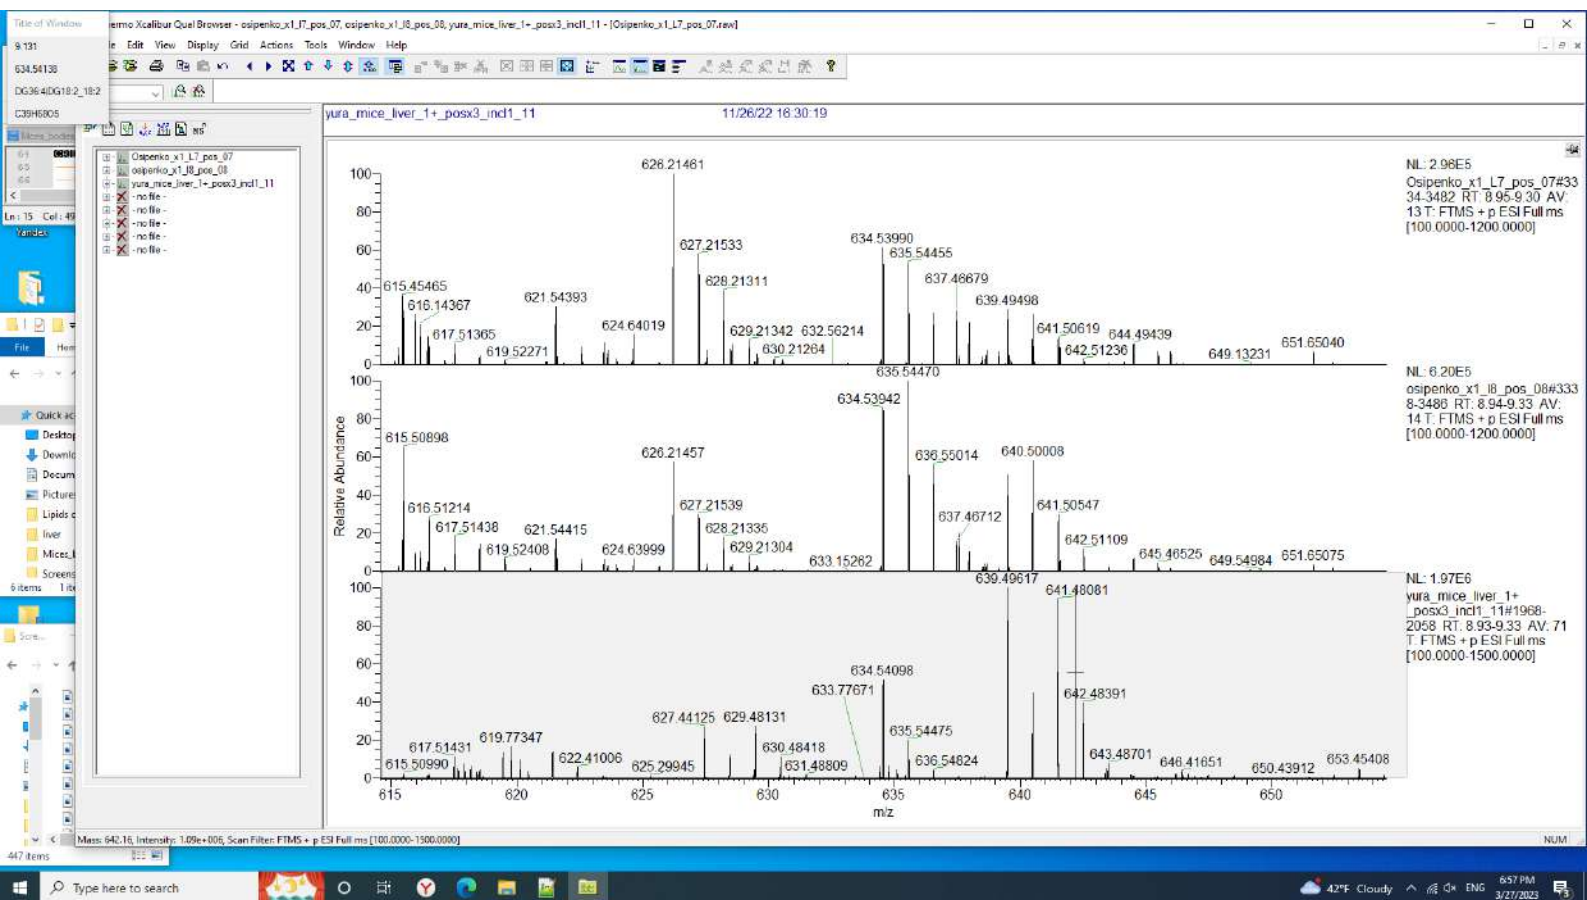

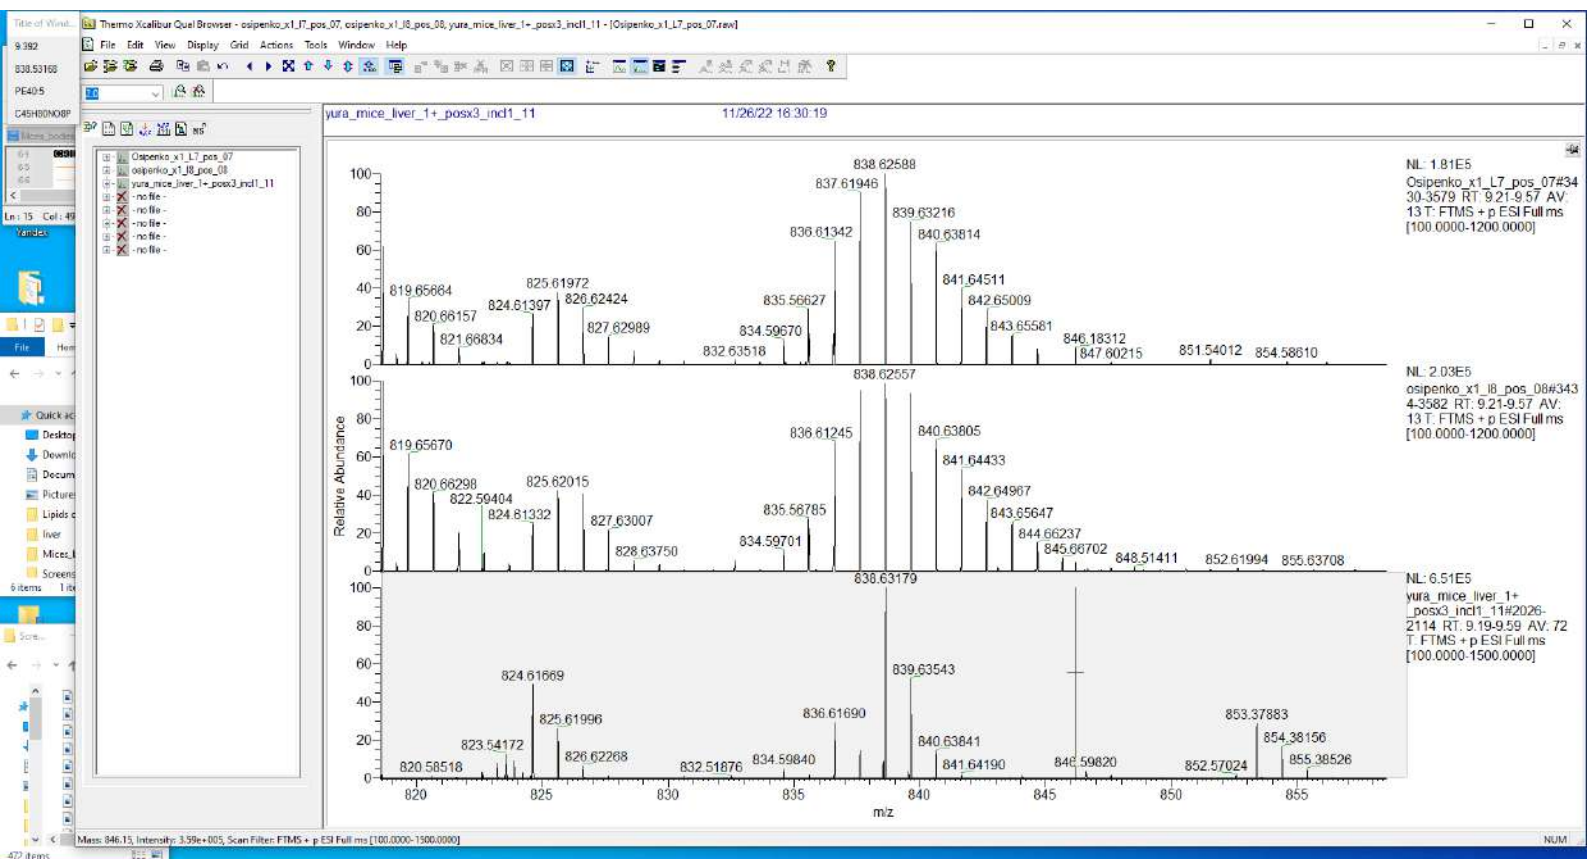

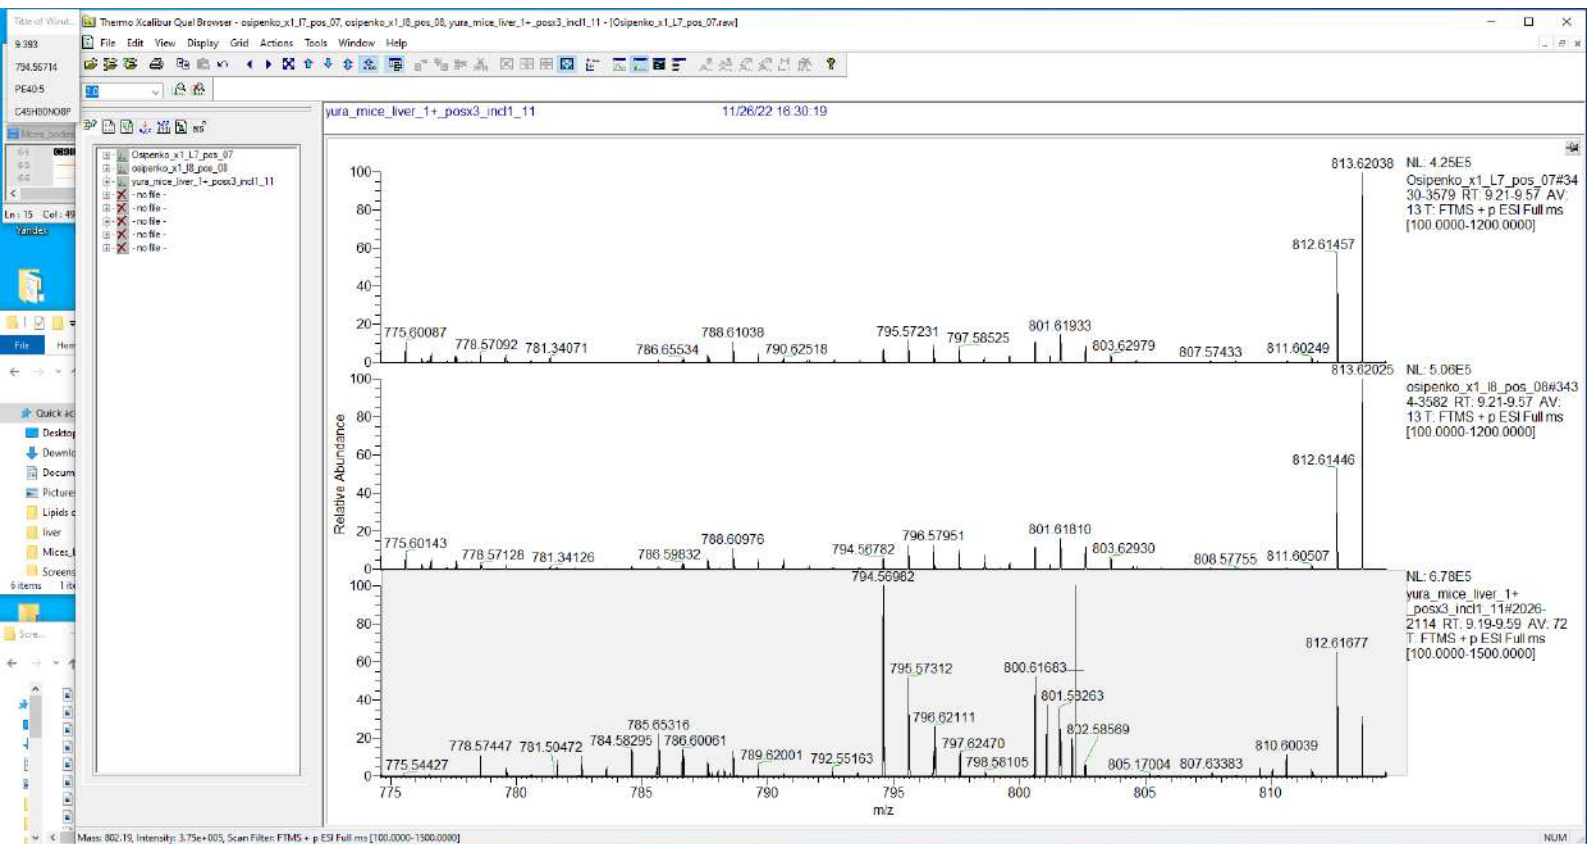

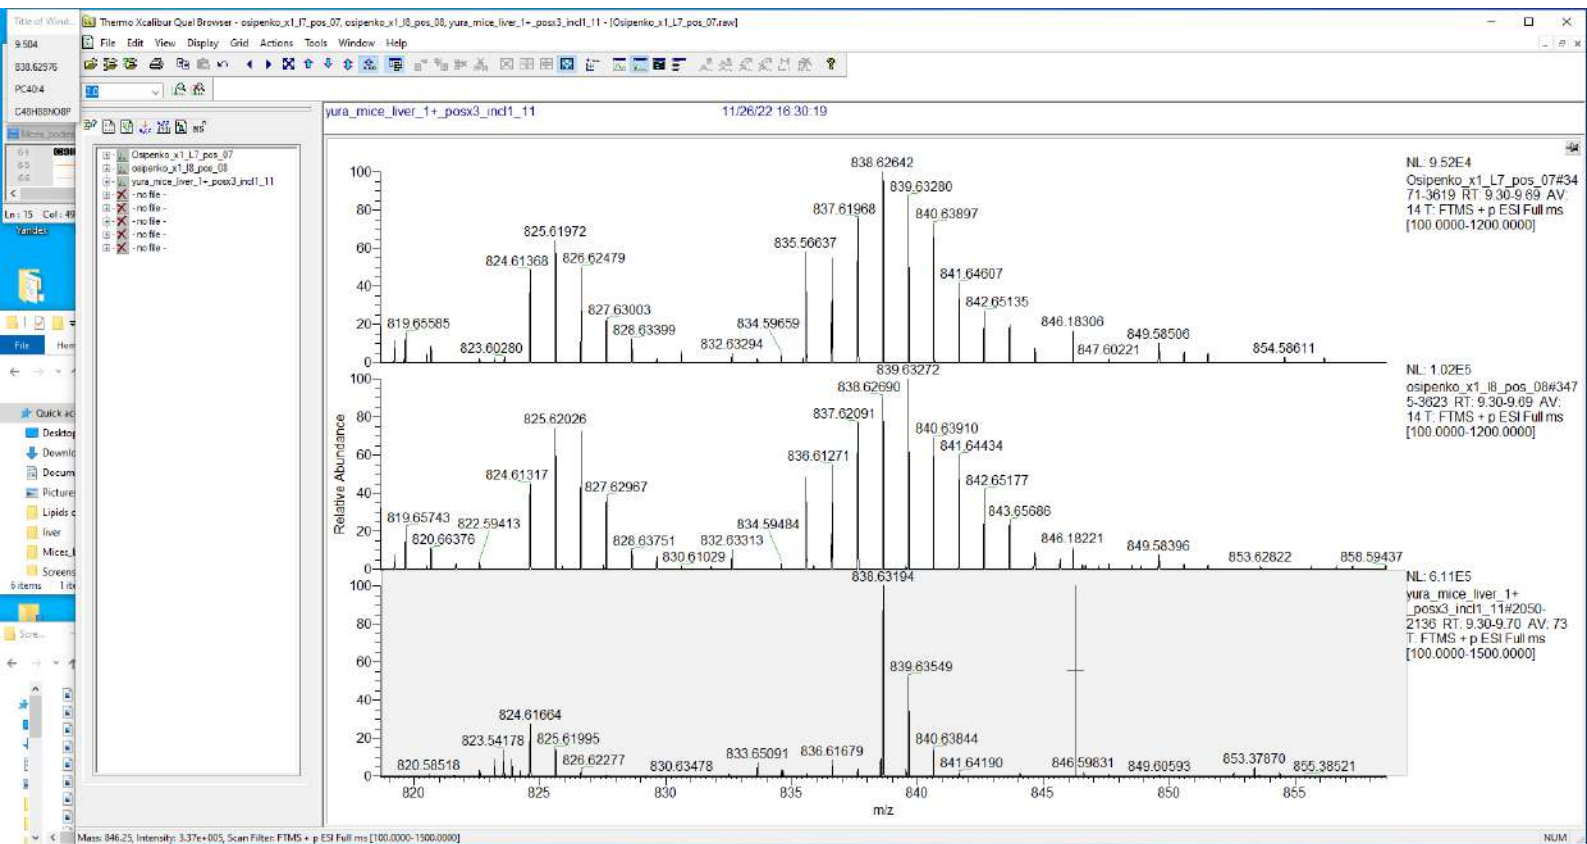



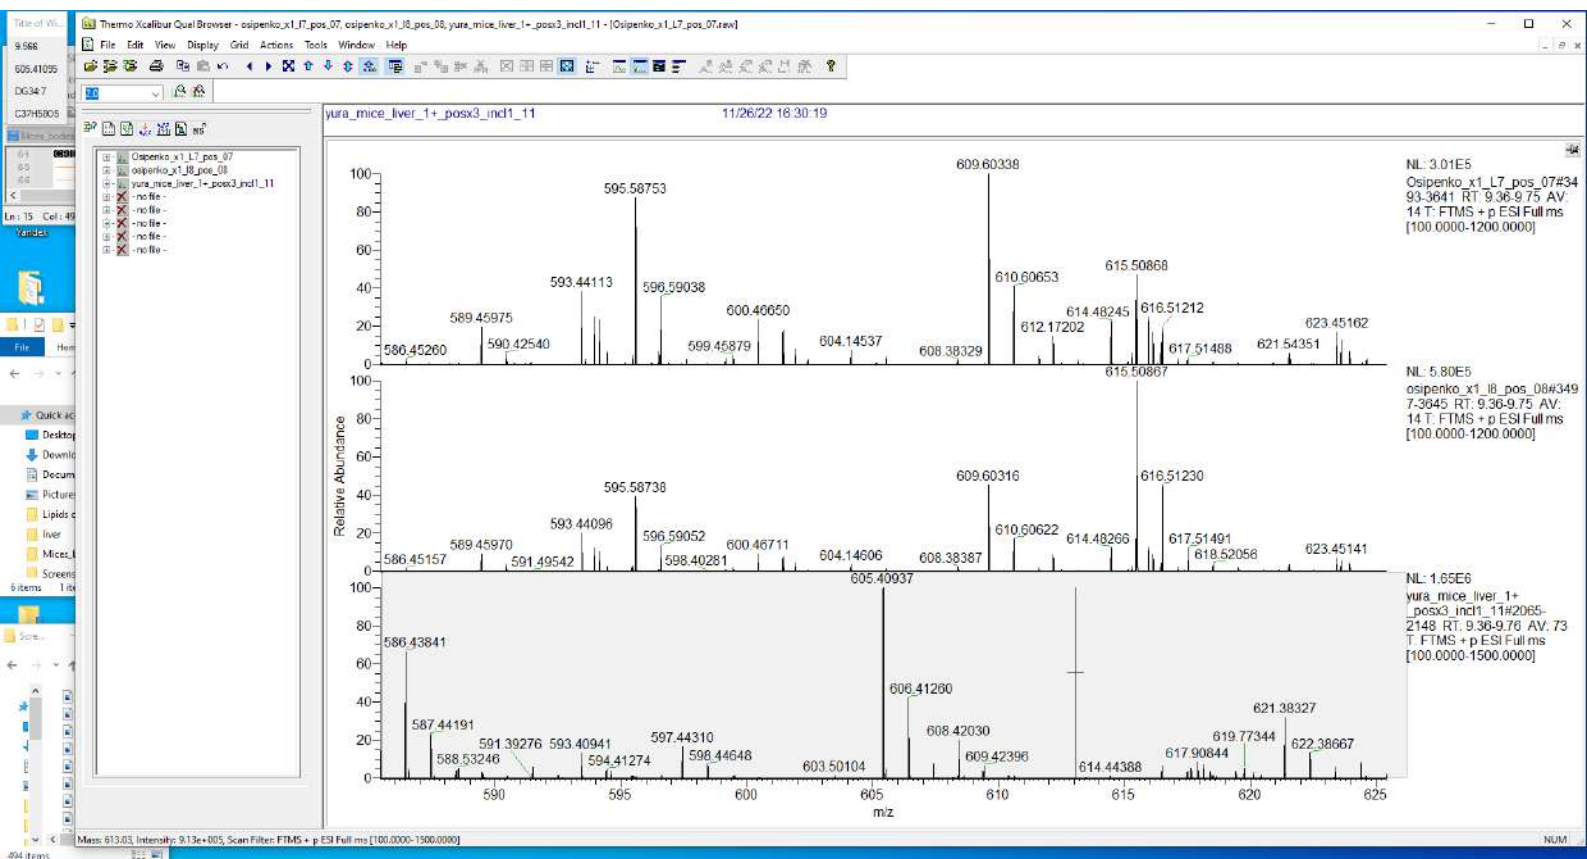



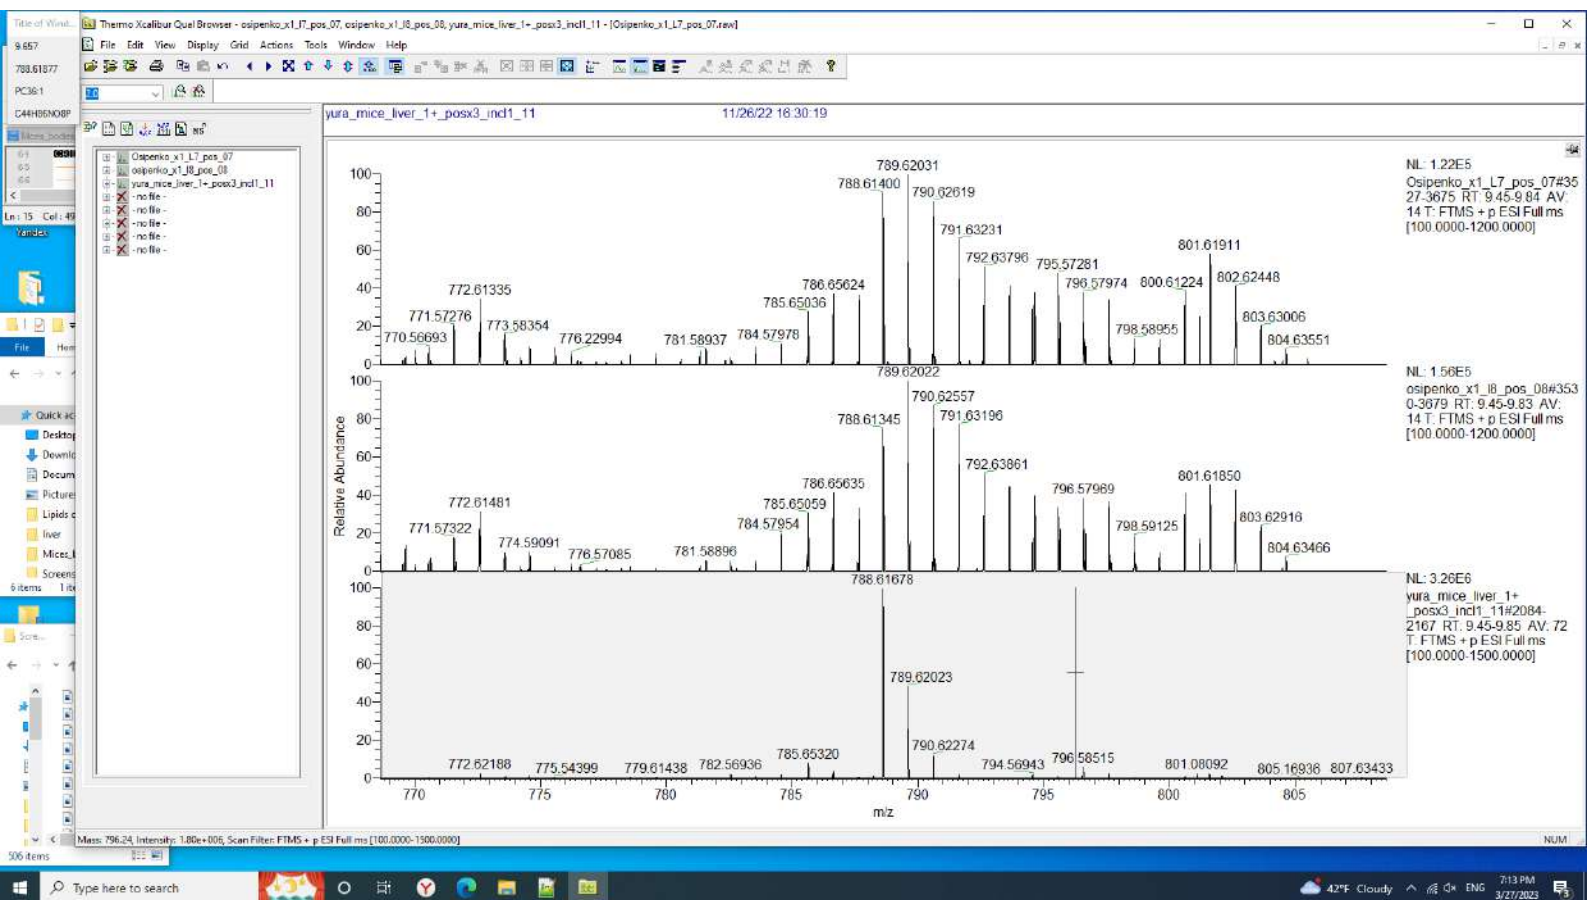

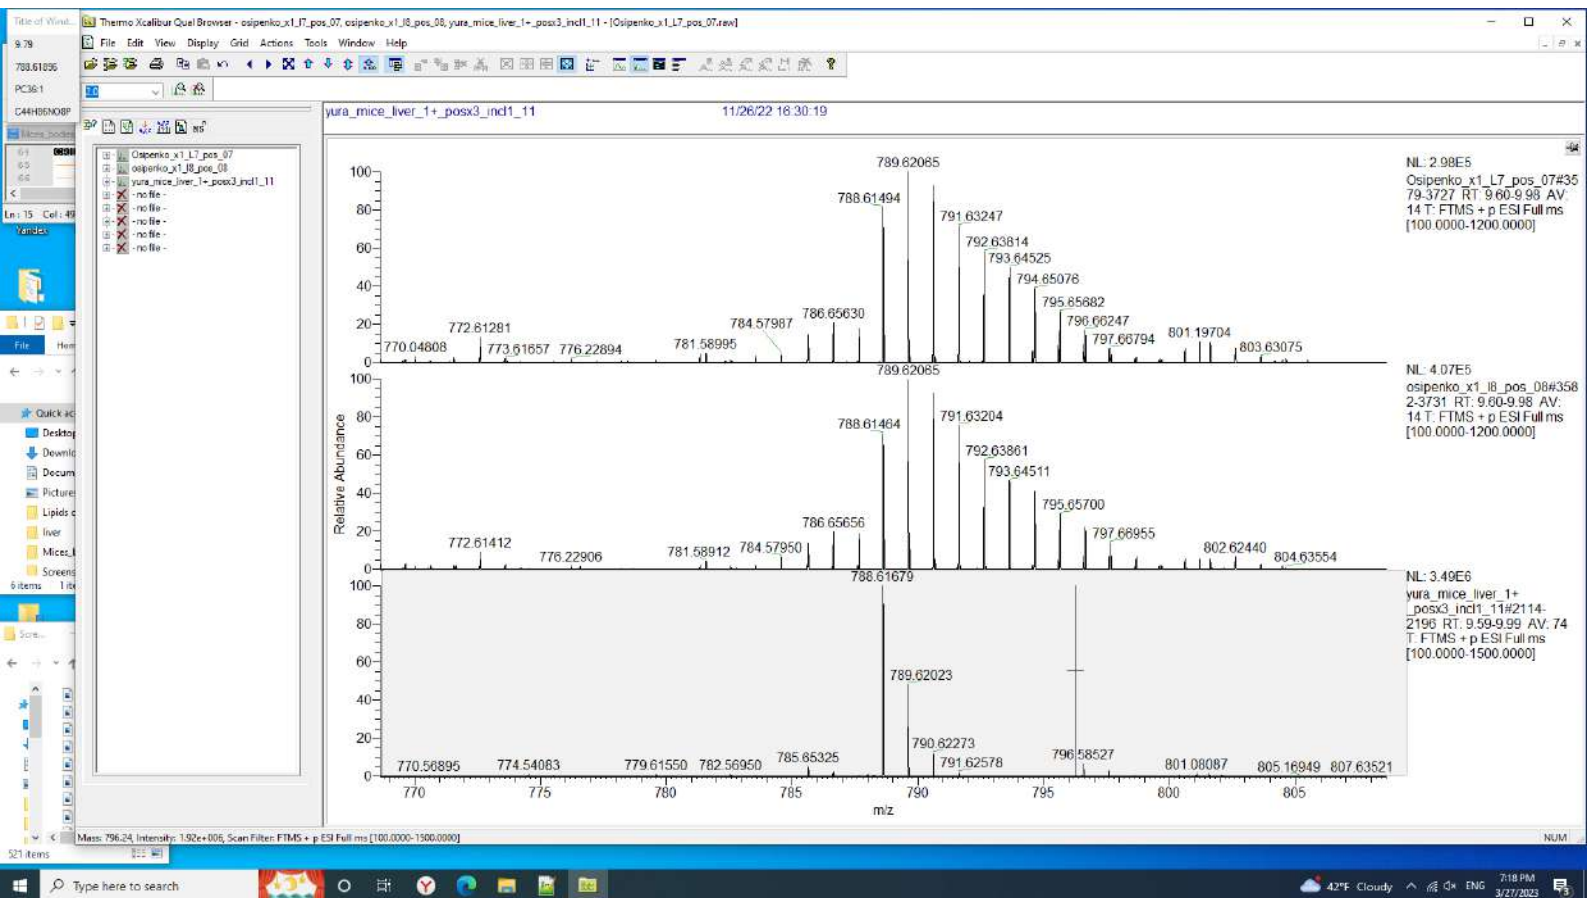

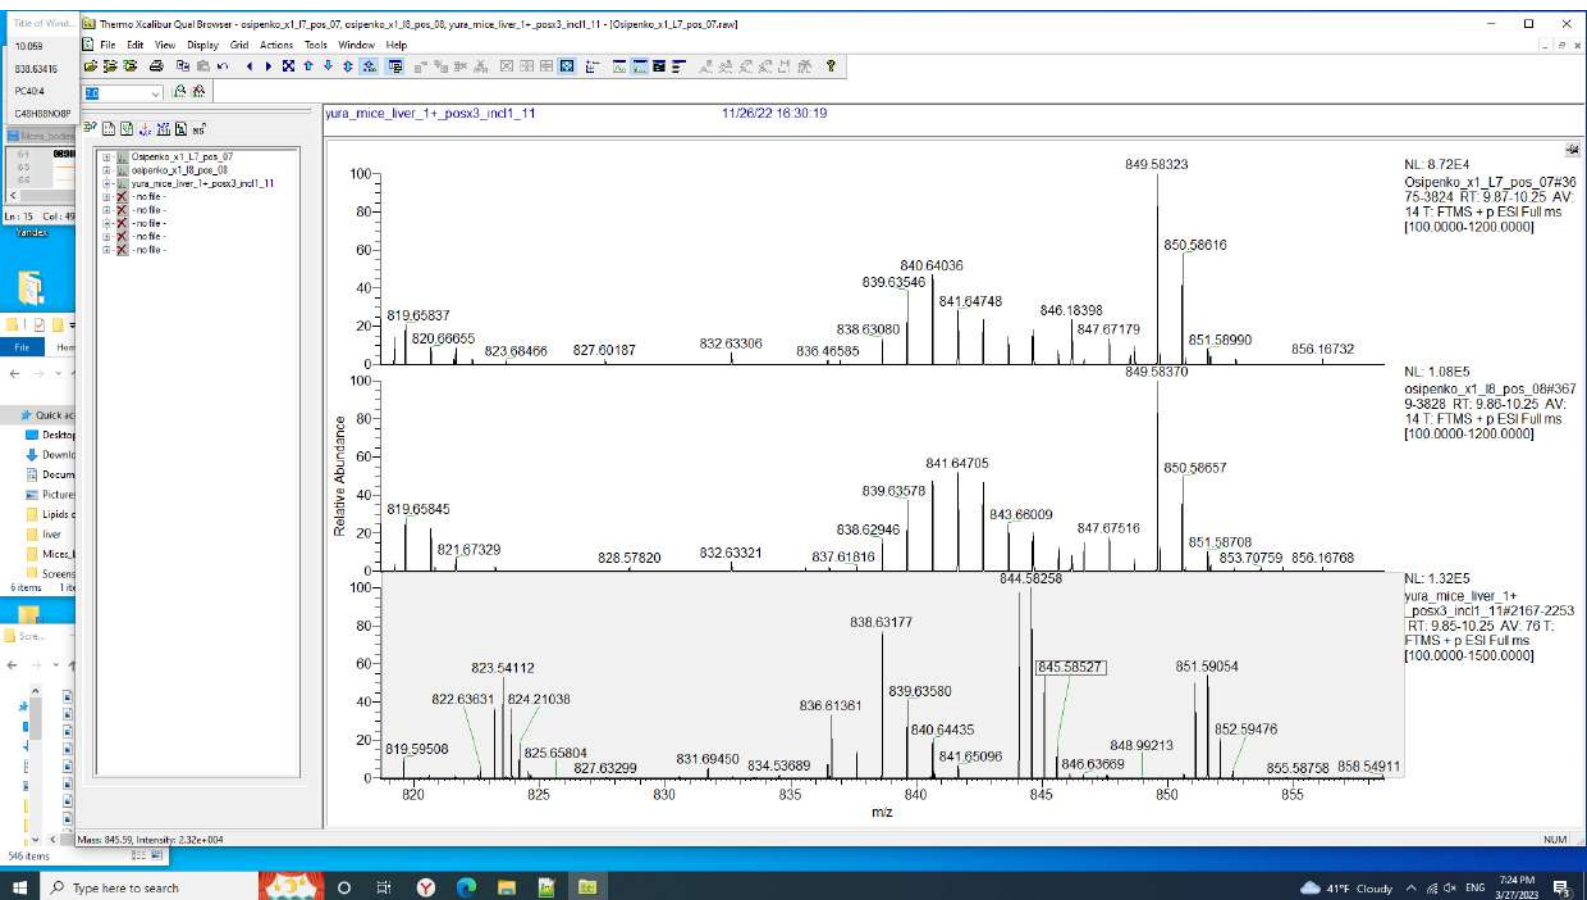

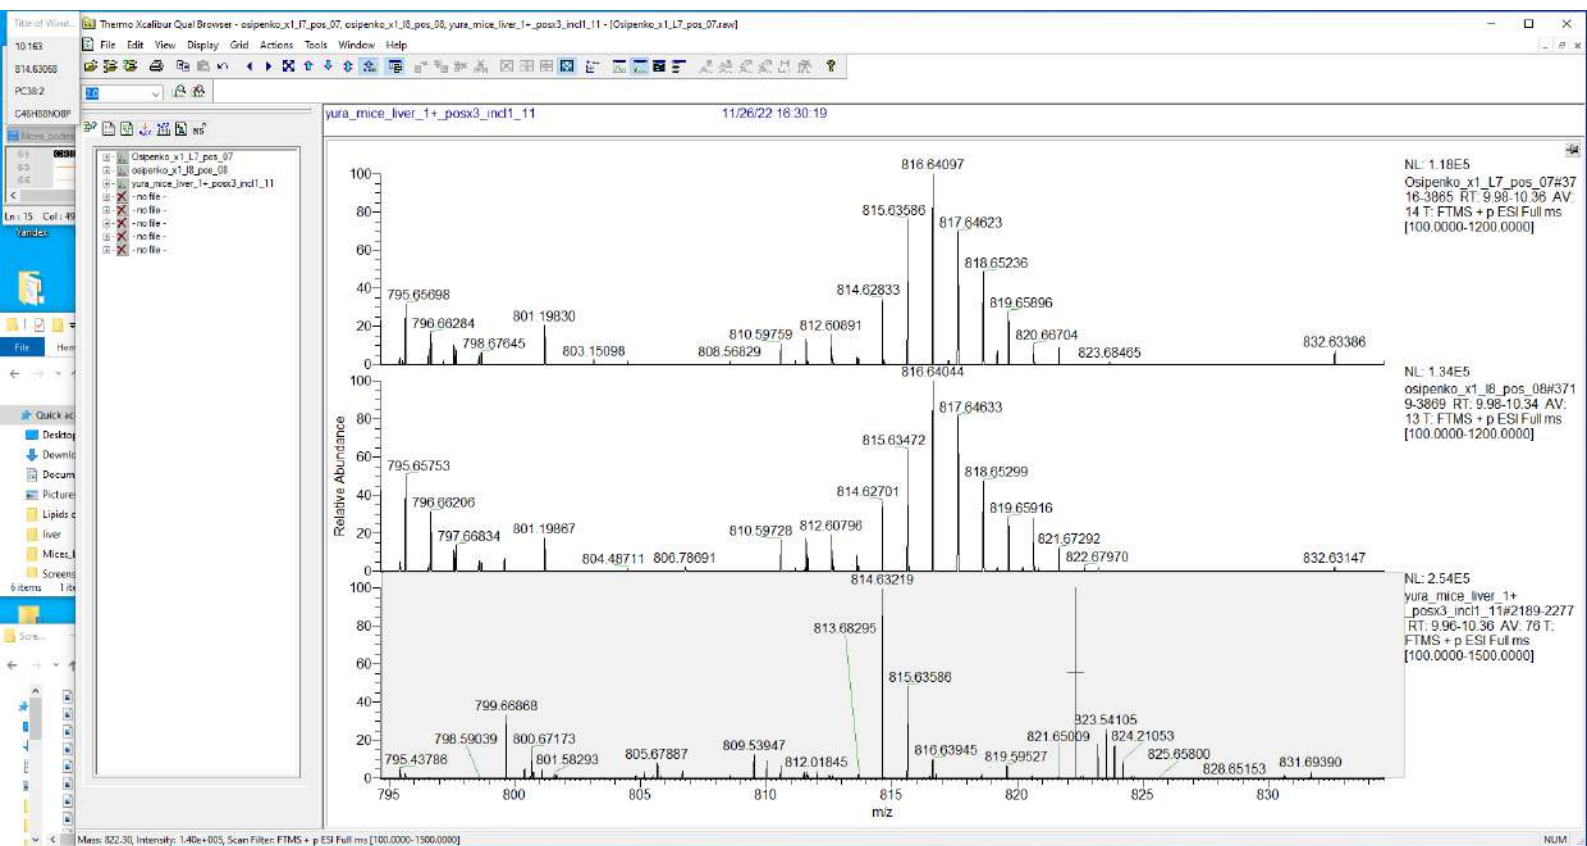

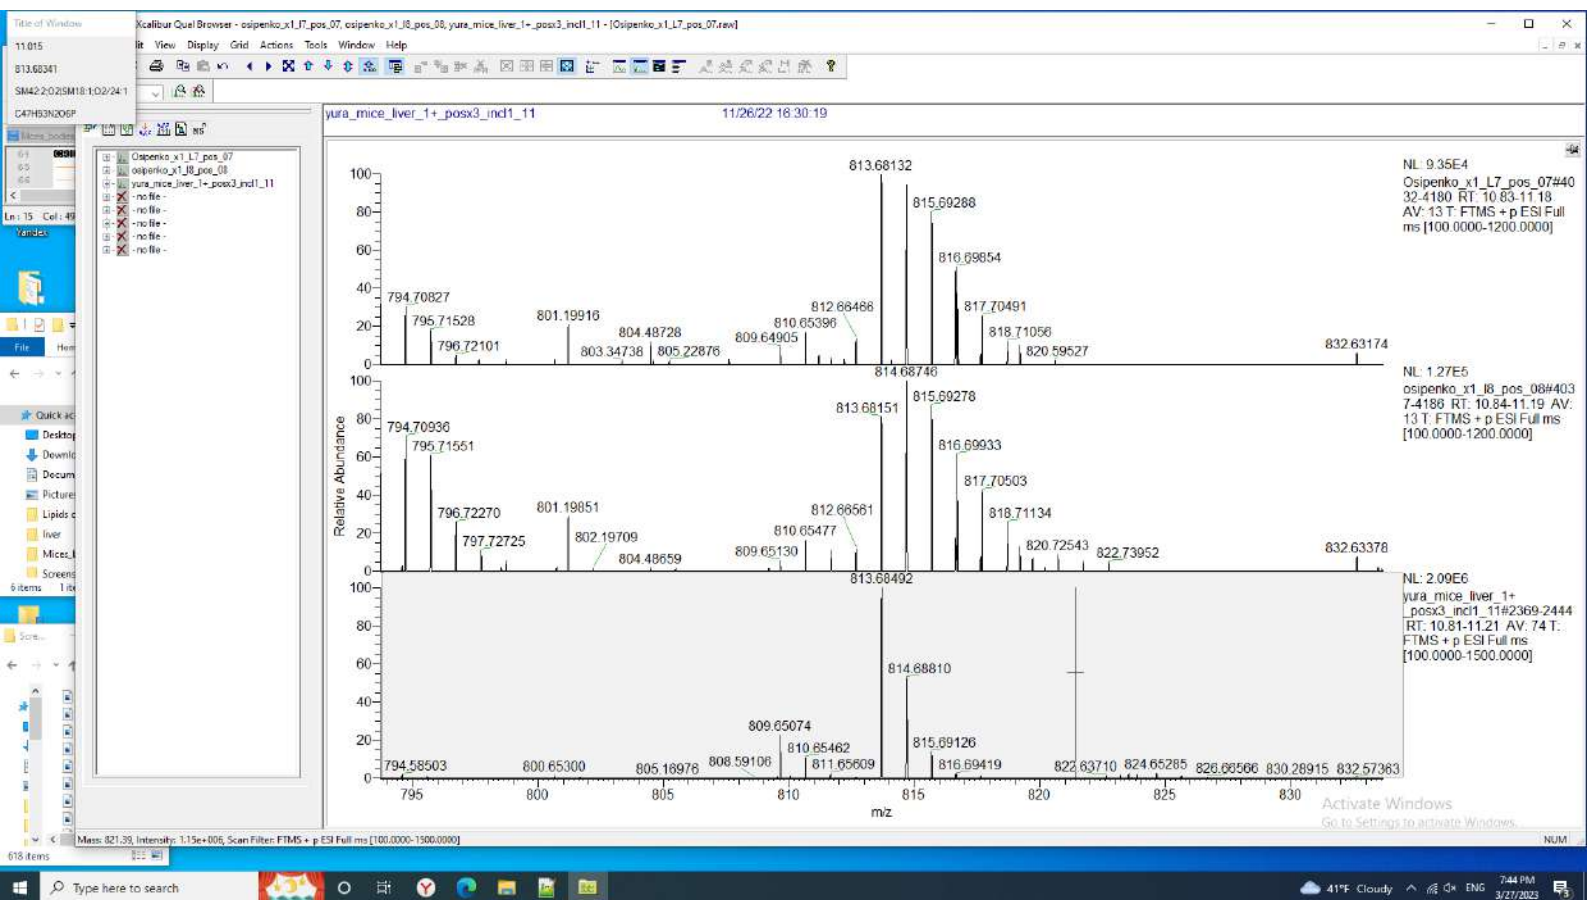

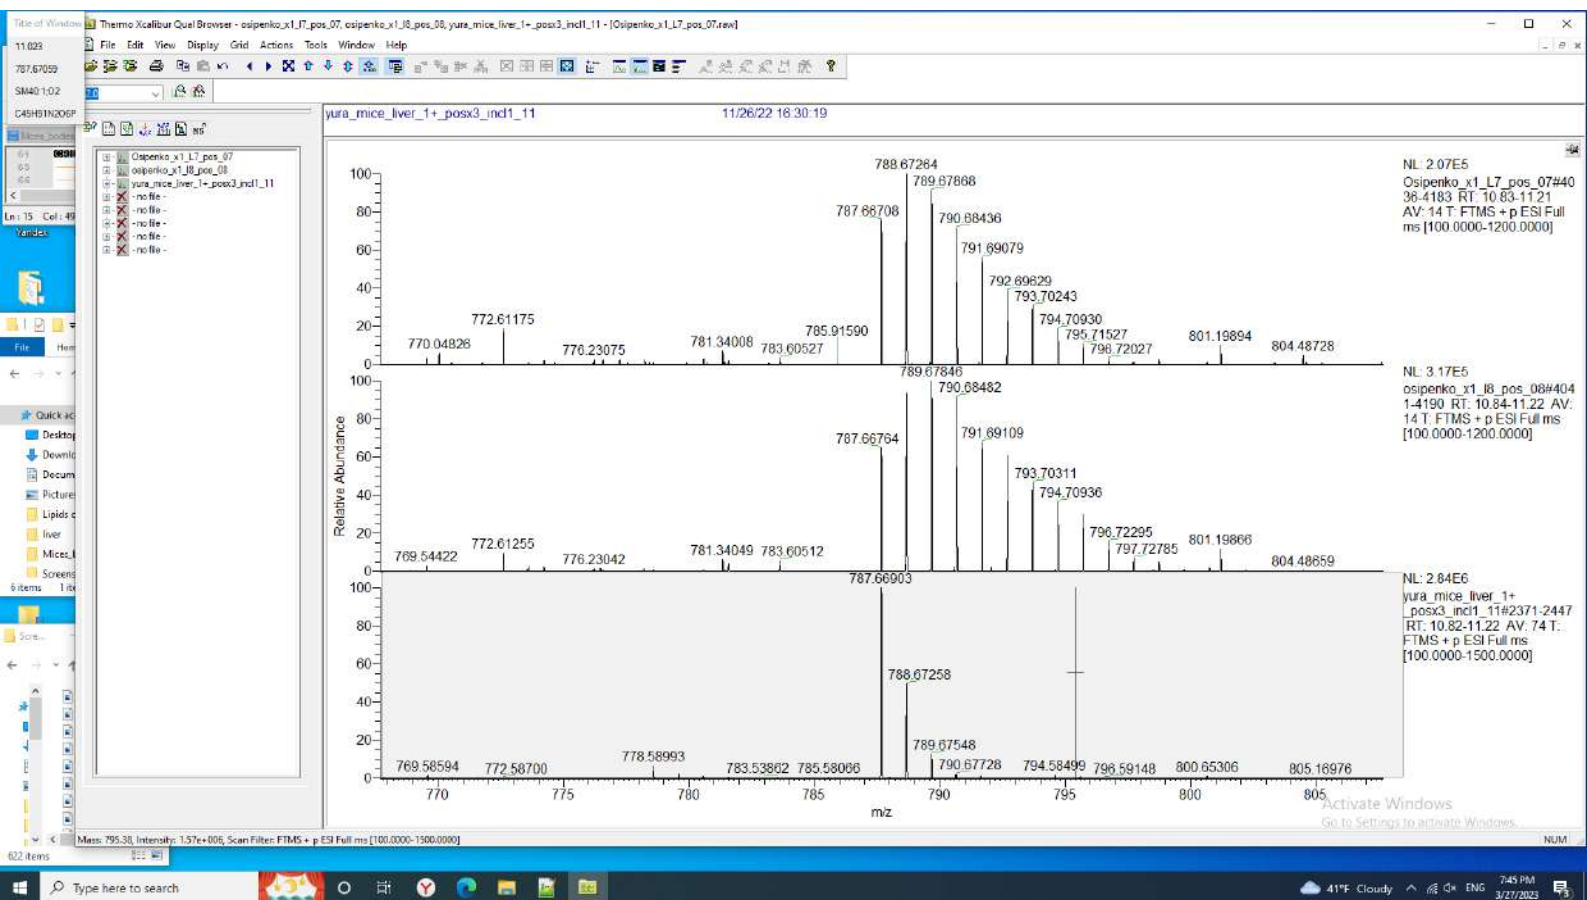



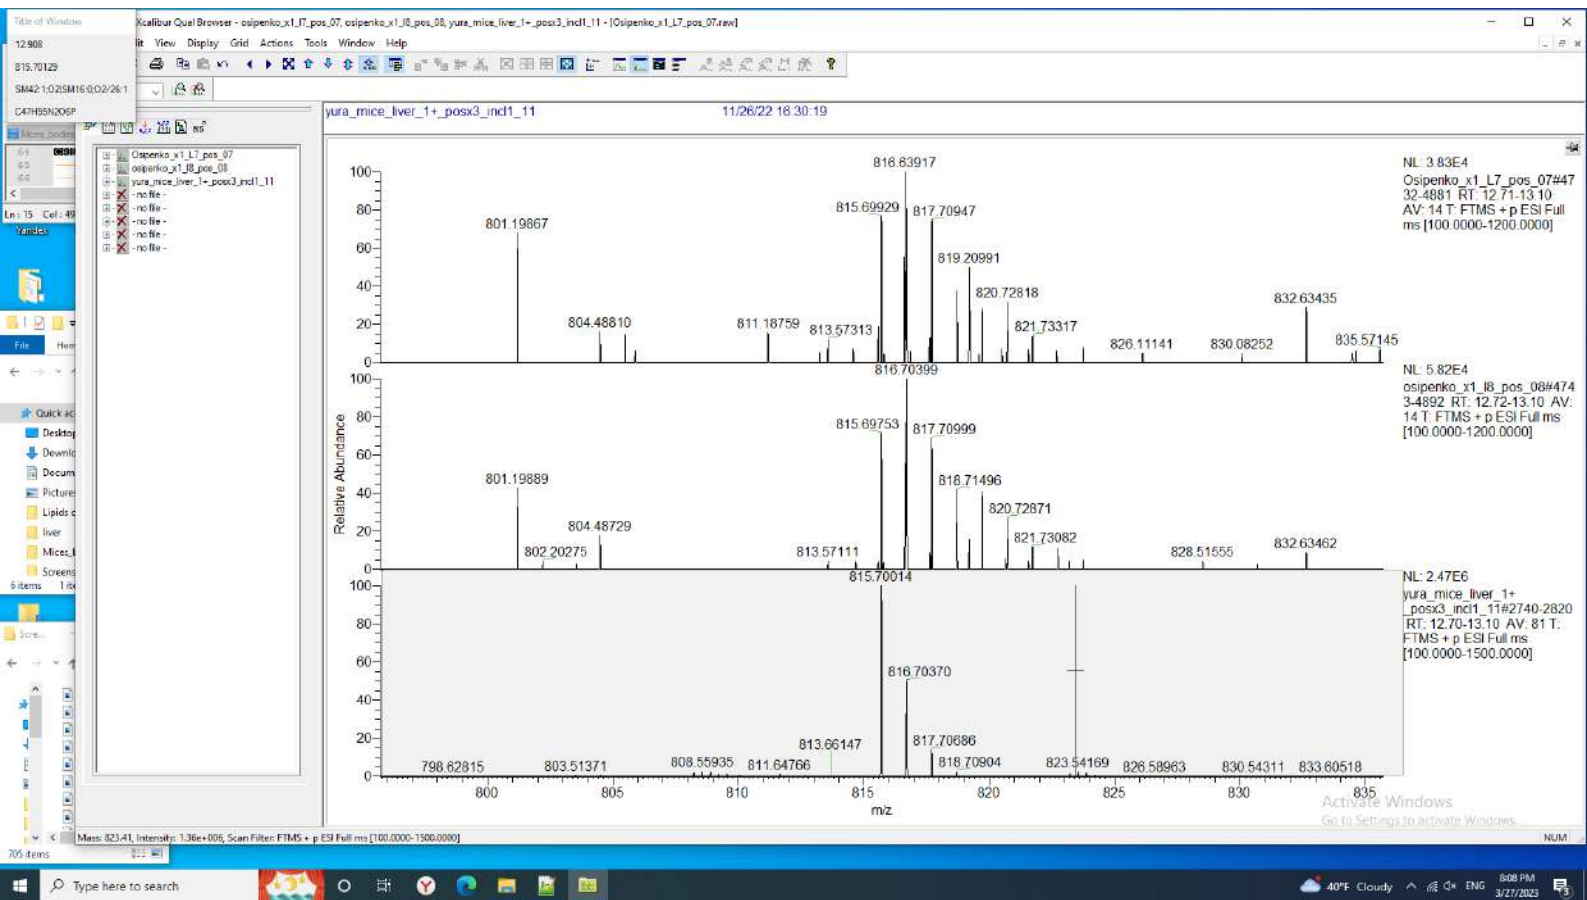

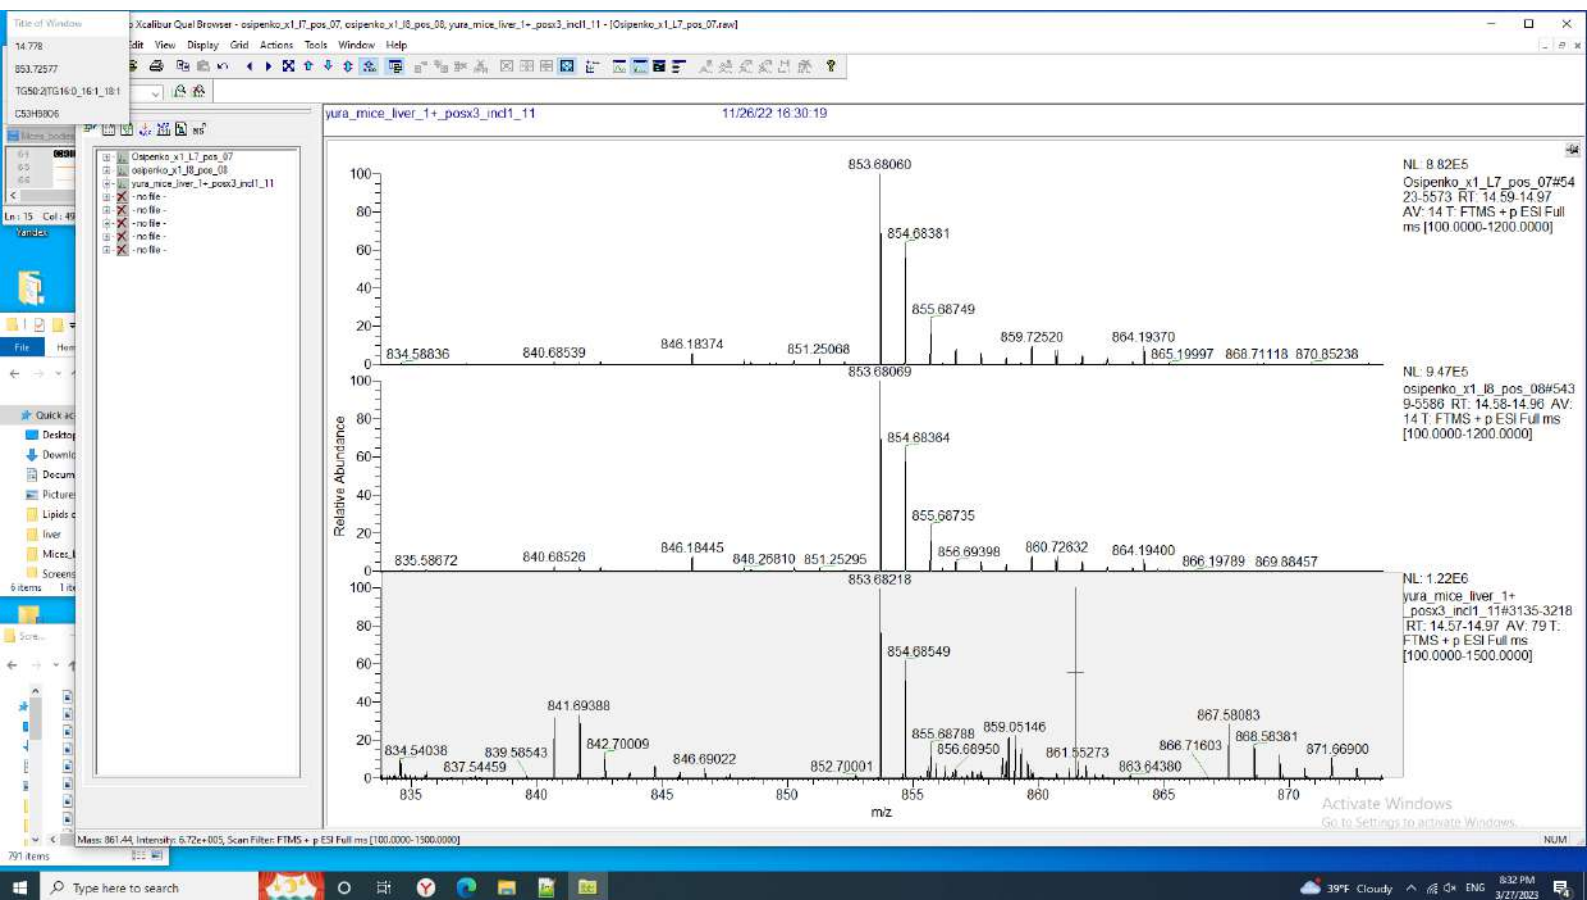

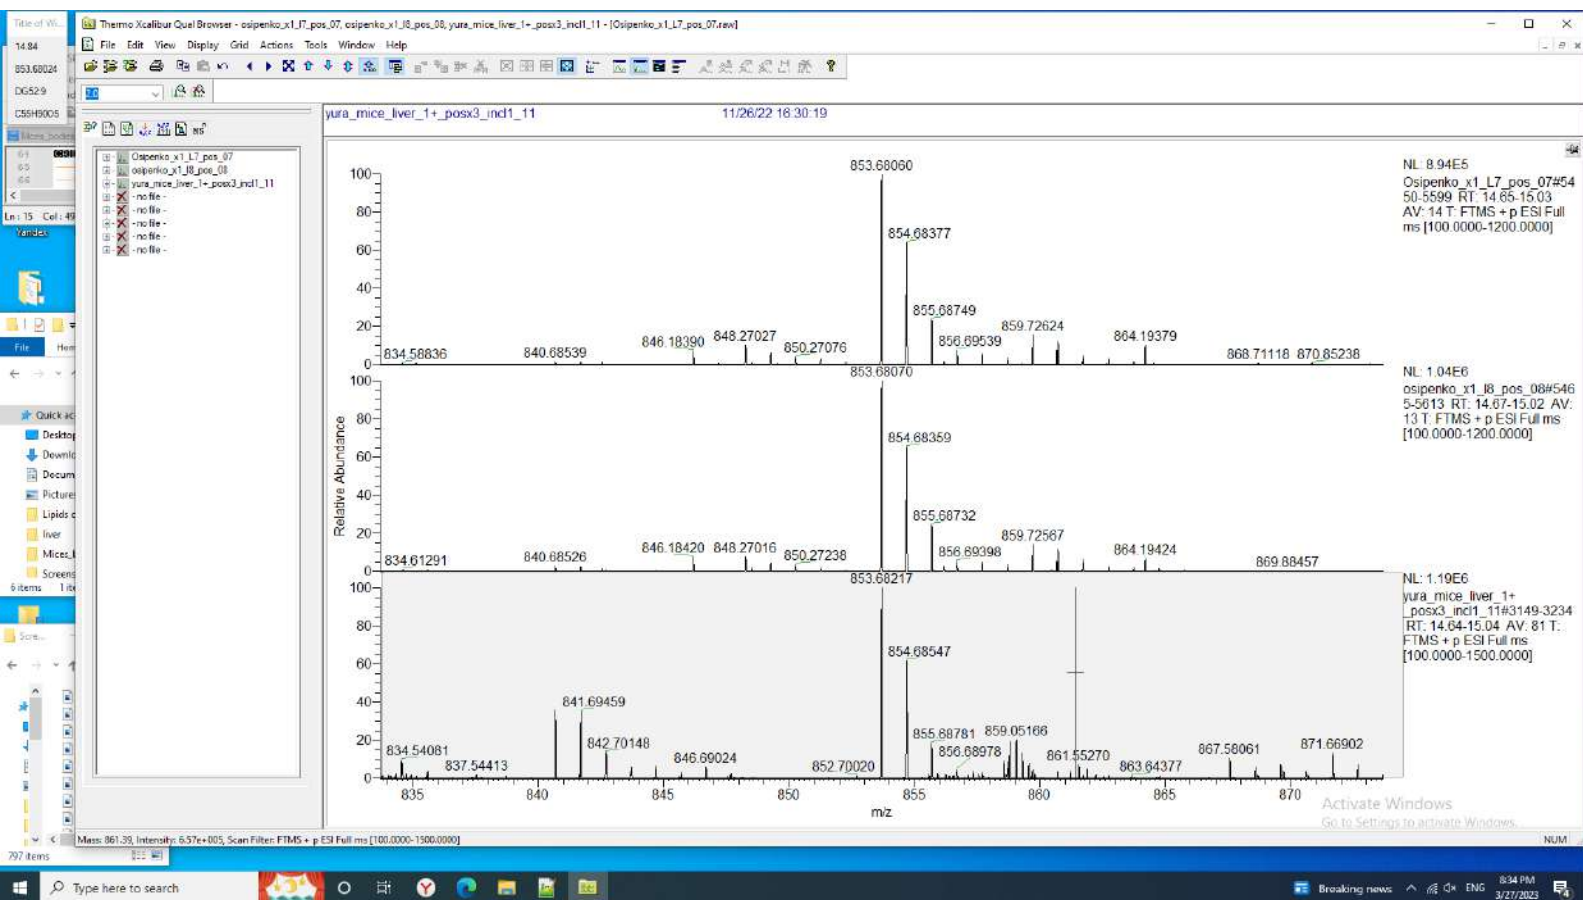

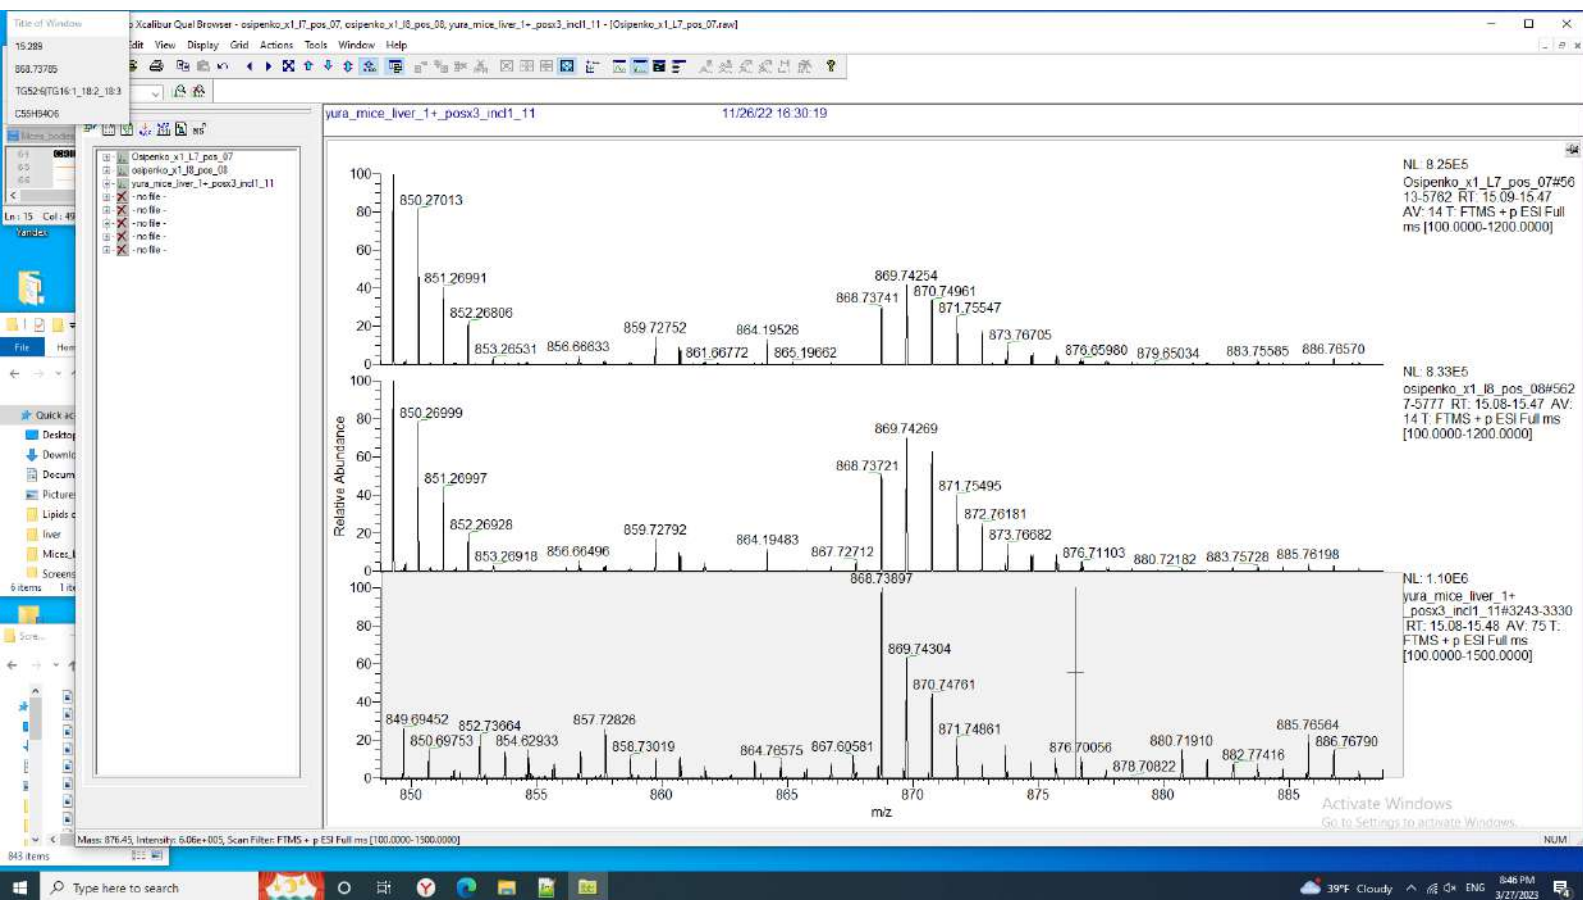

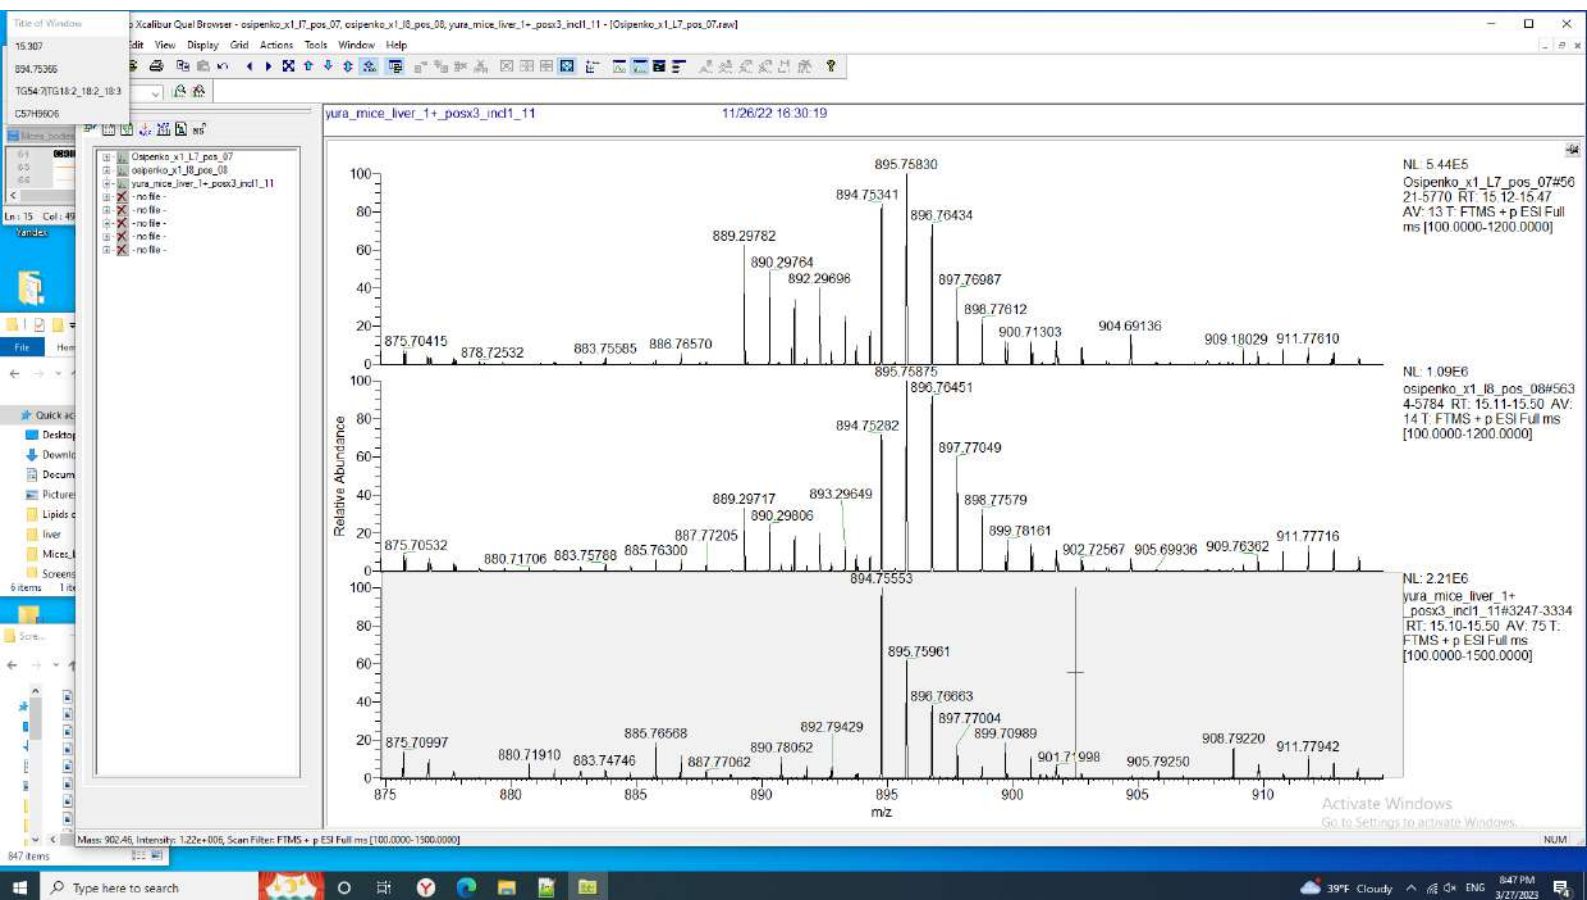

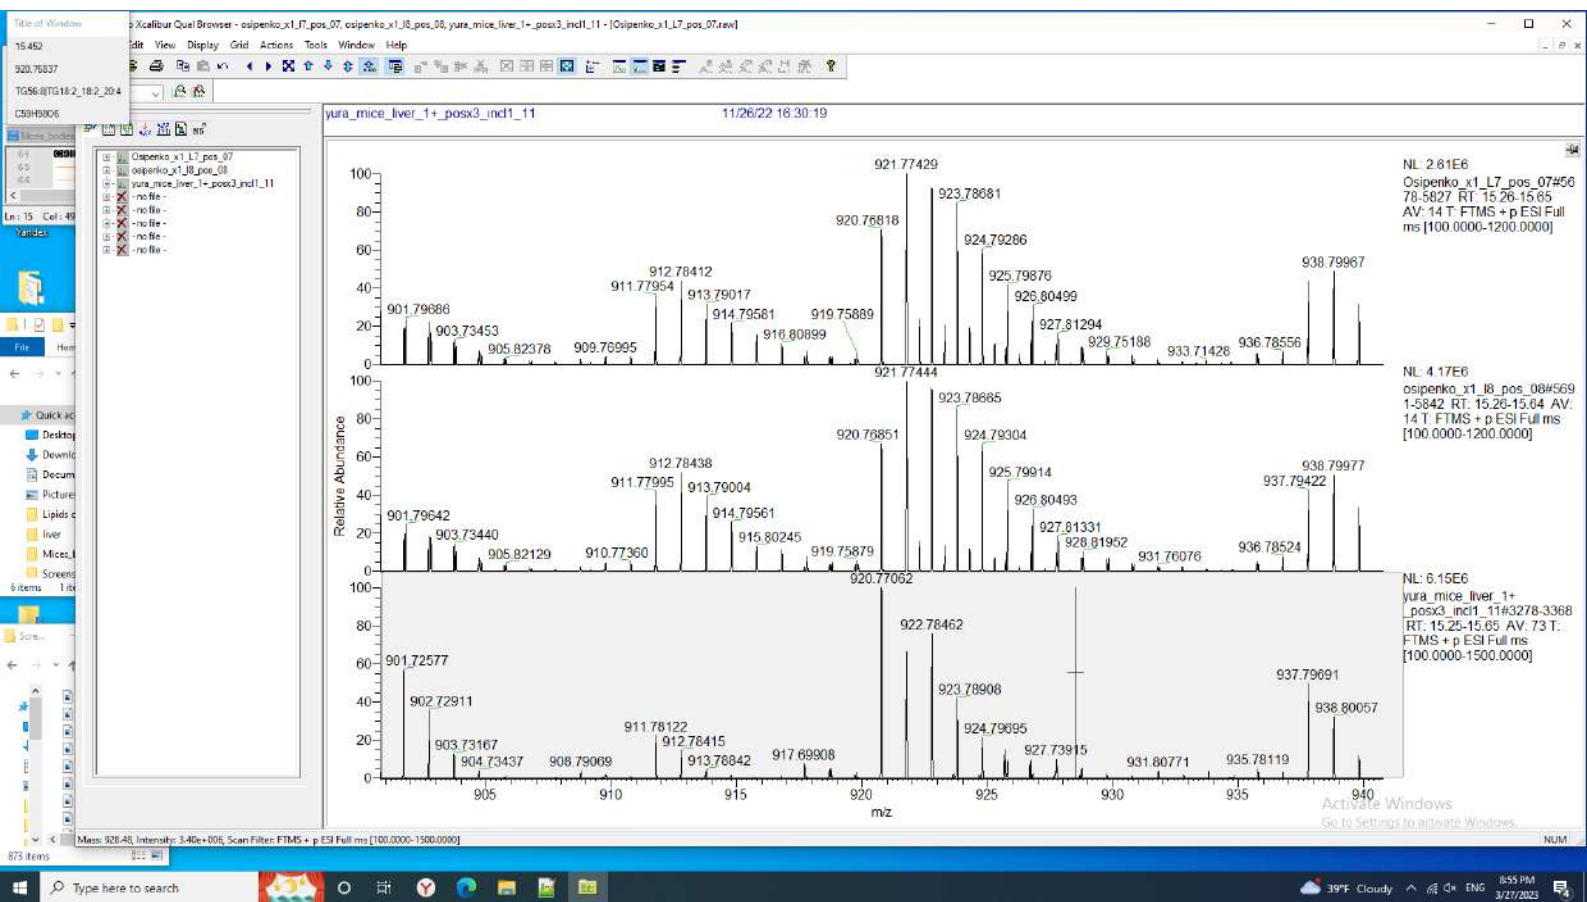



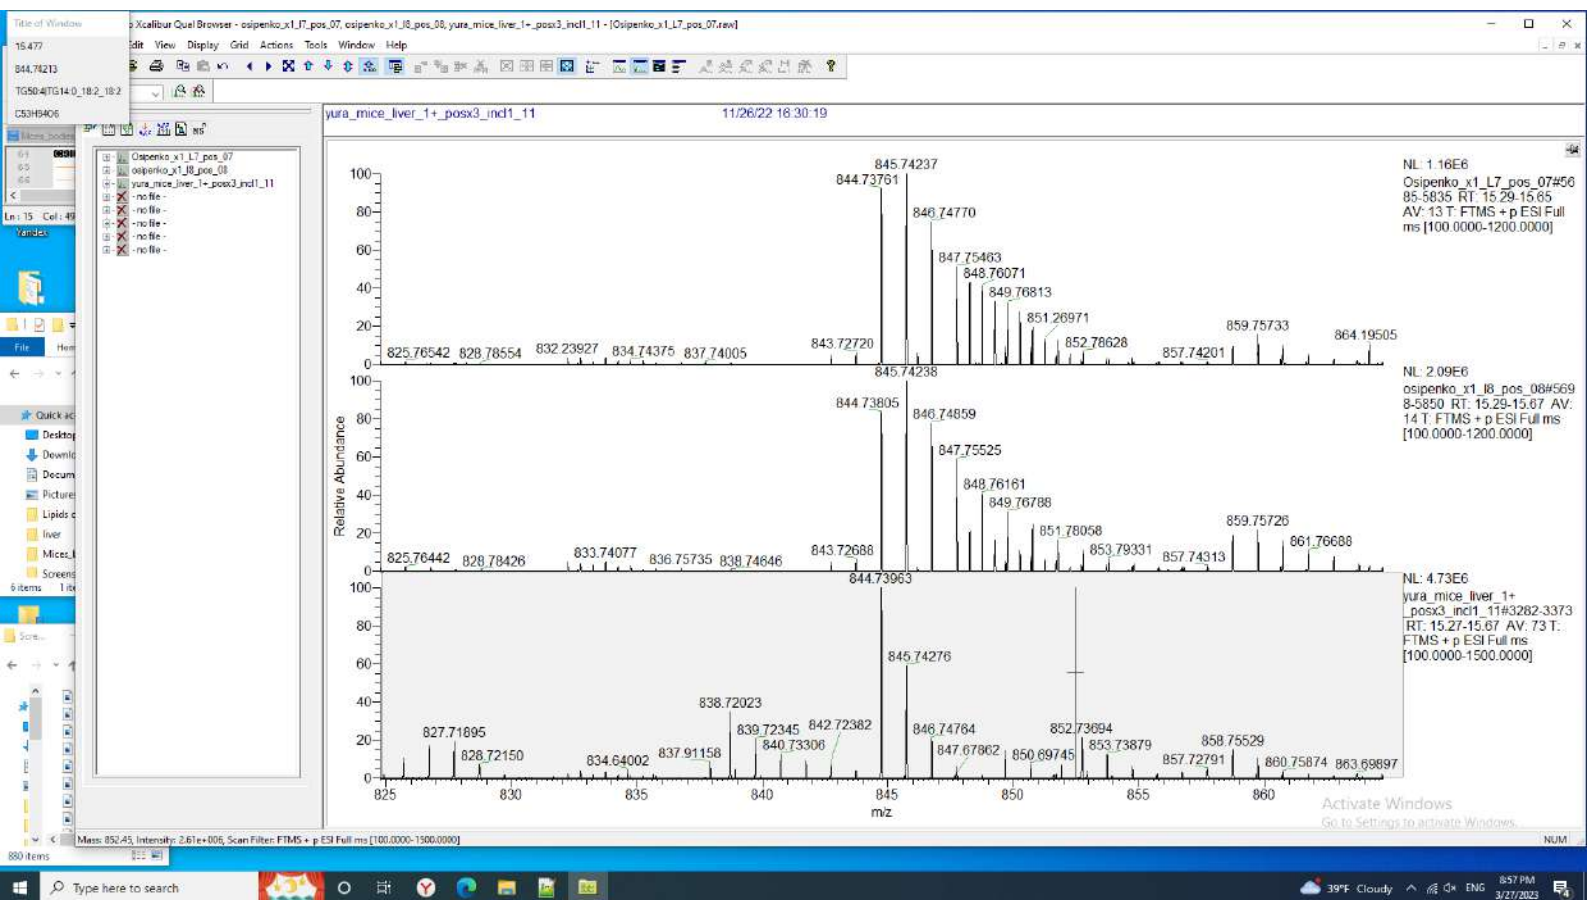

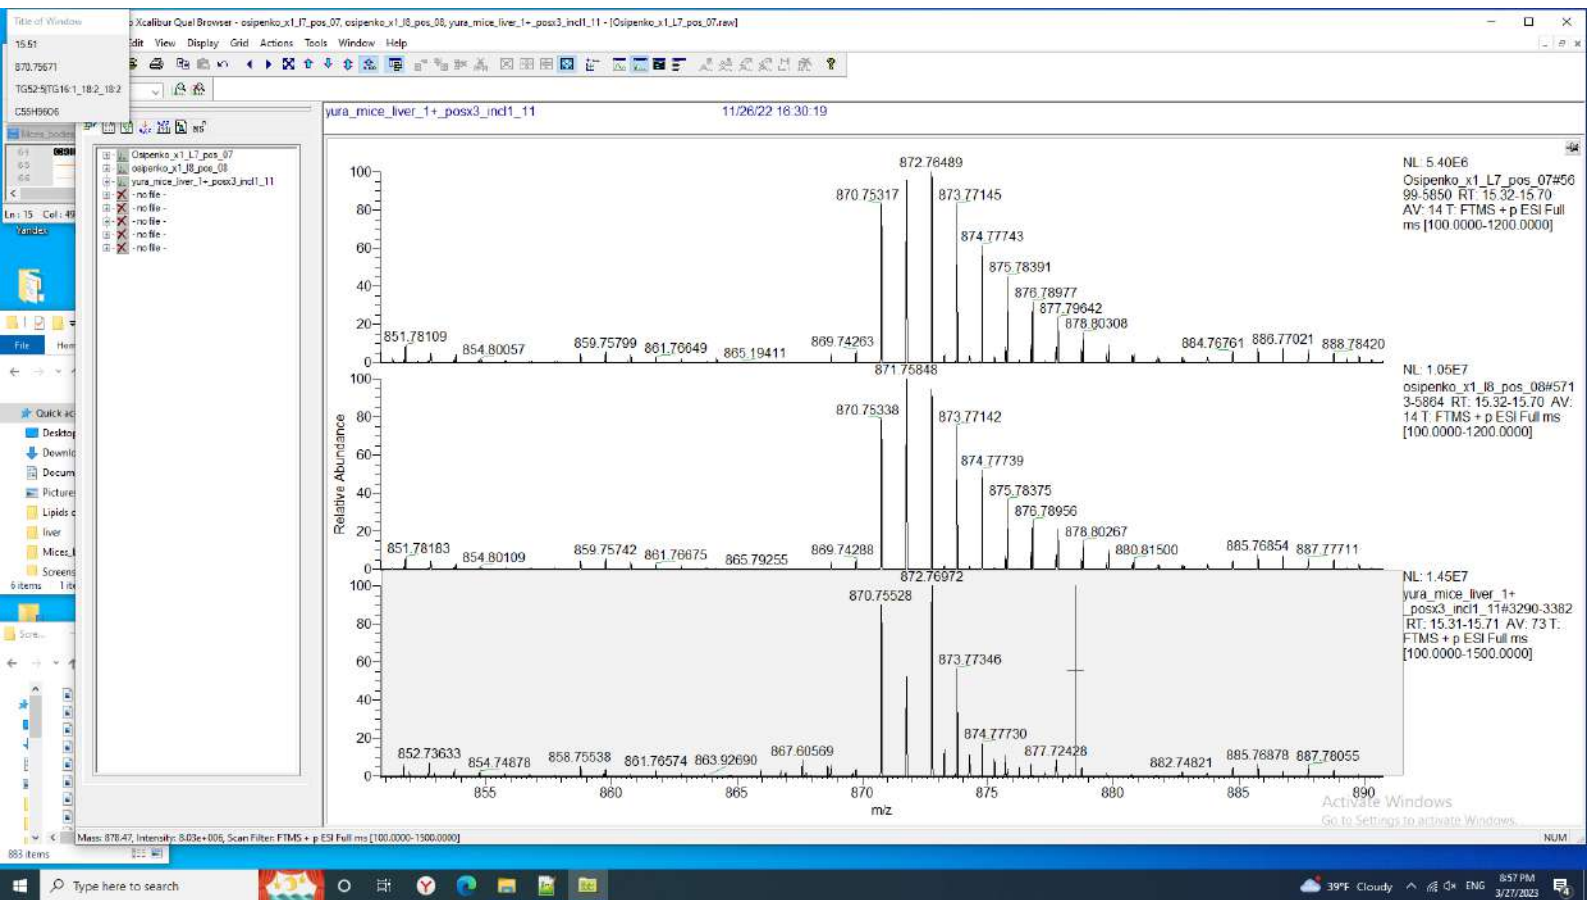

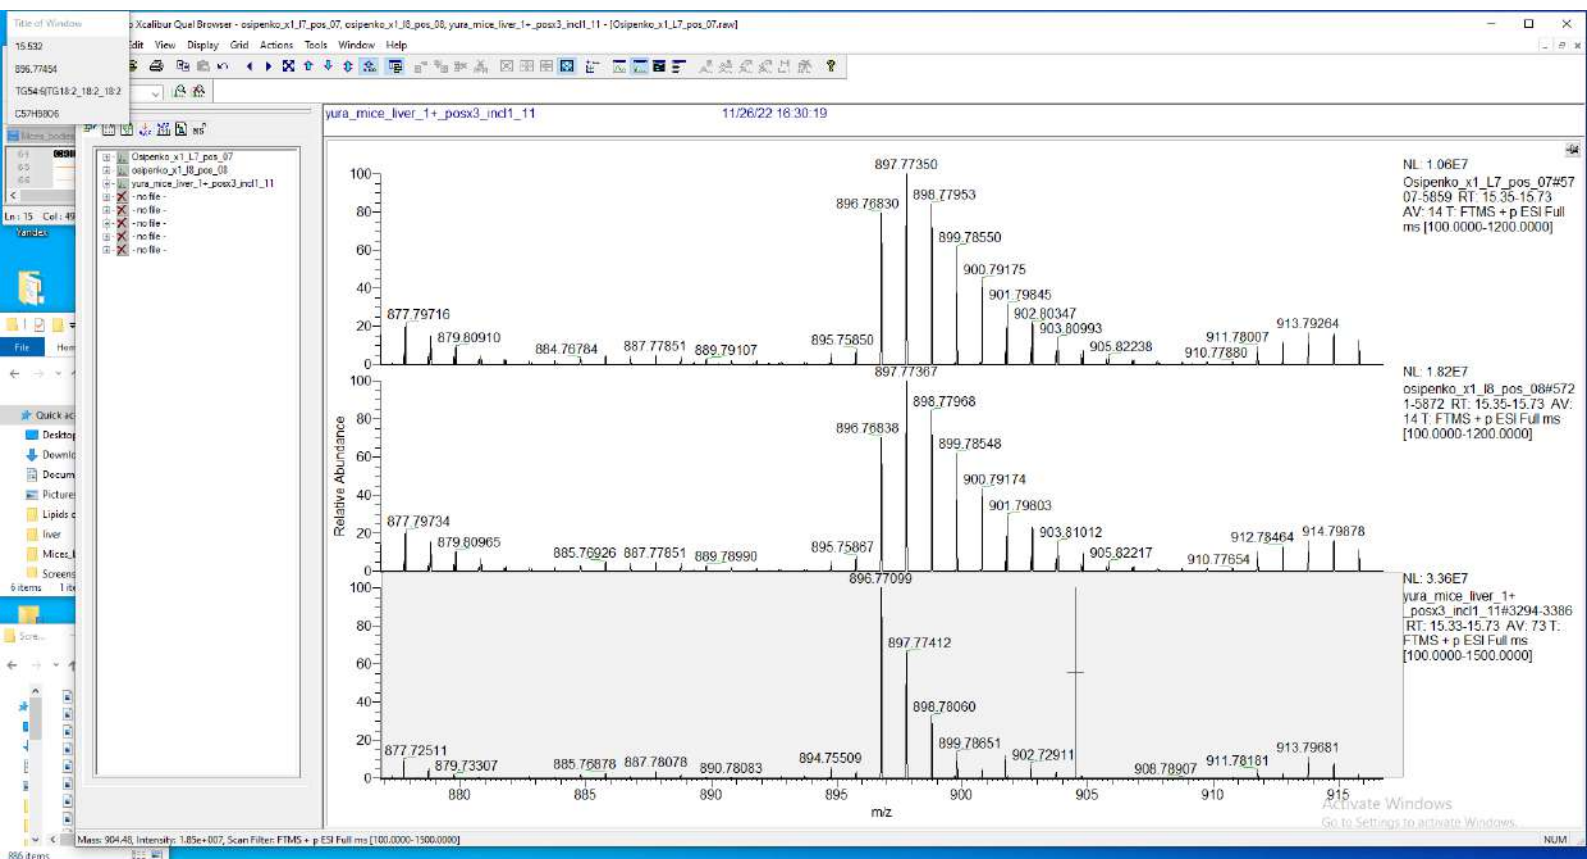

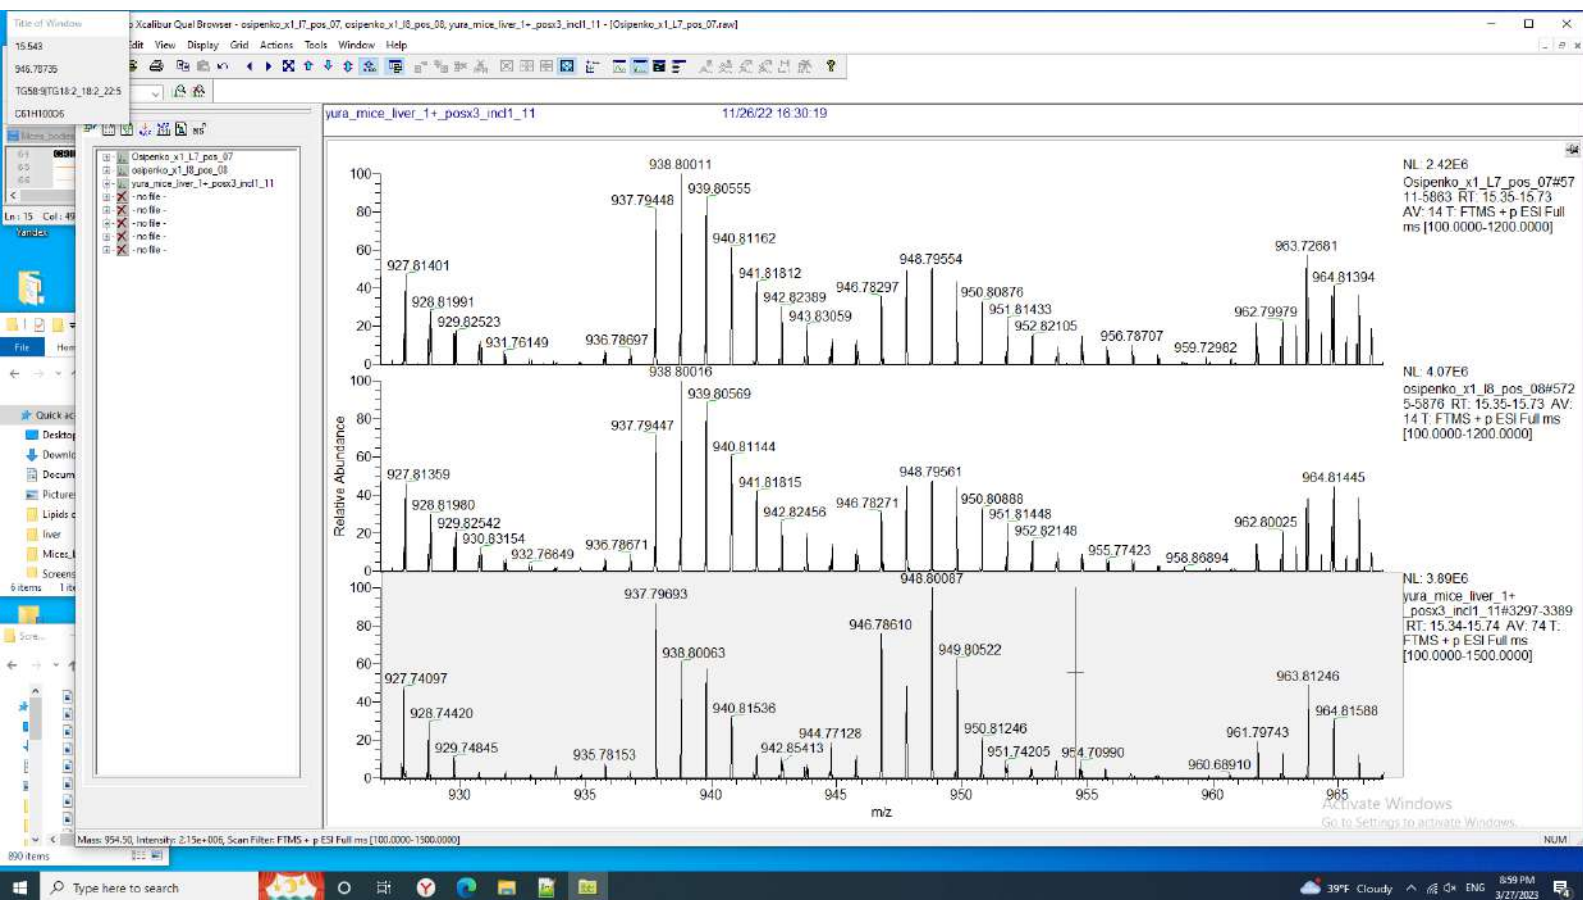

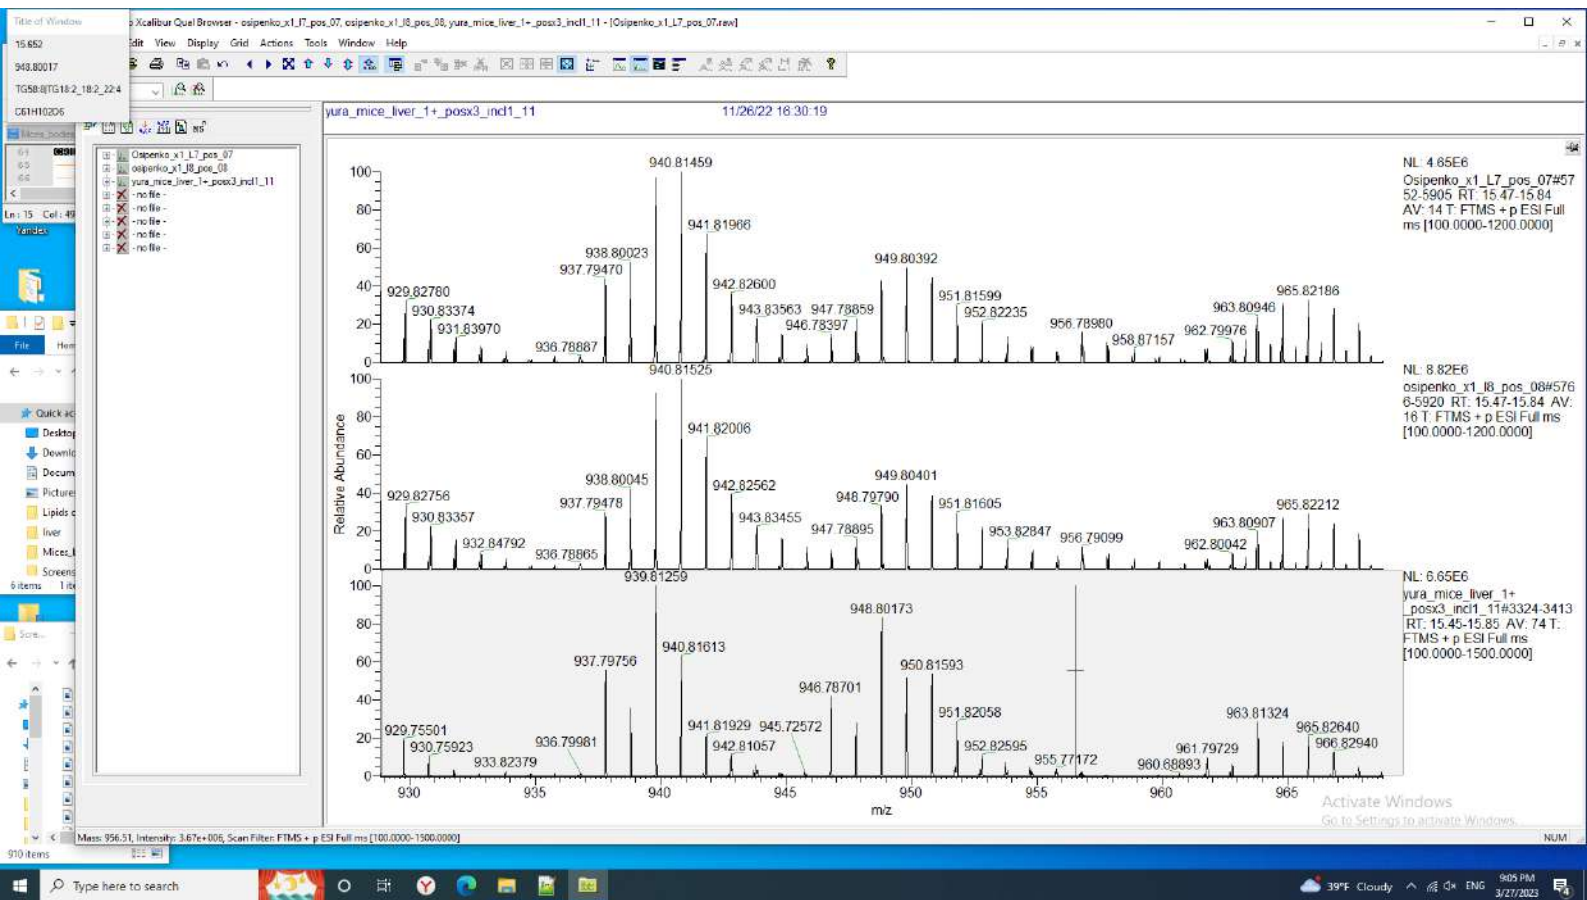

Activate Windows  
Go to Settings to activate Windows.



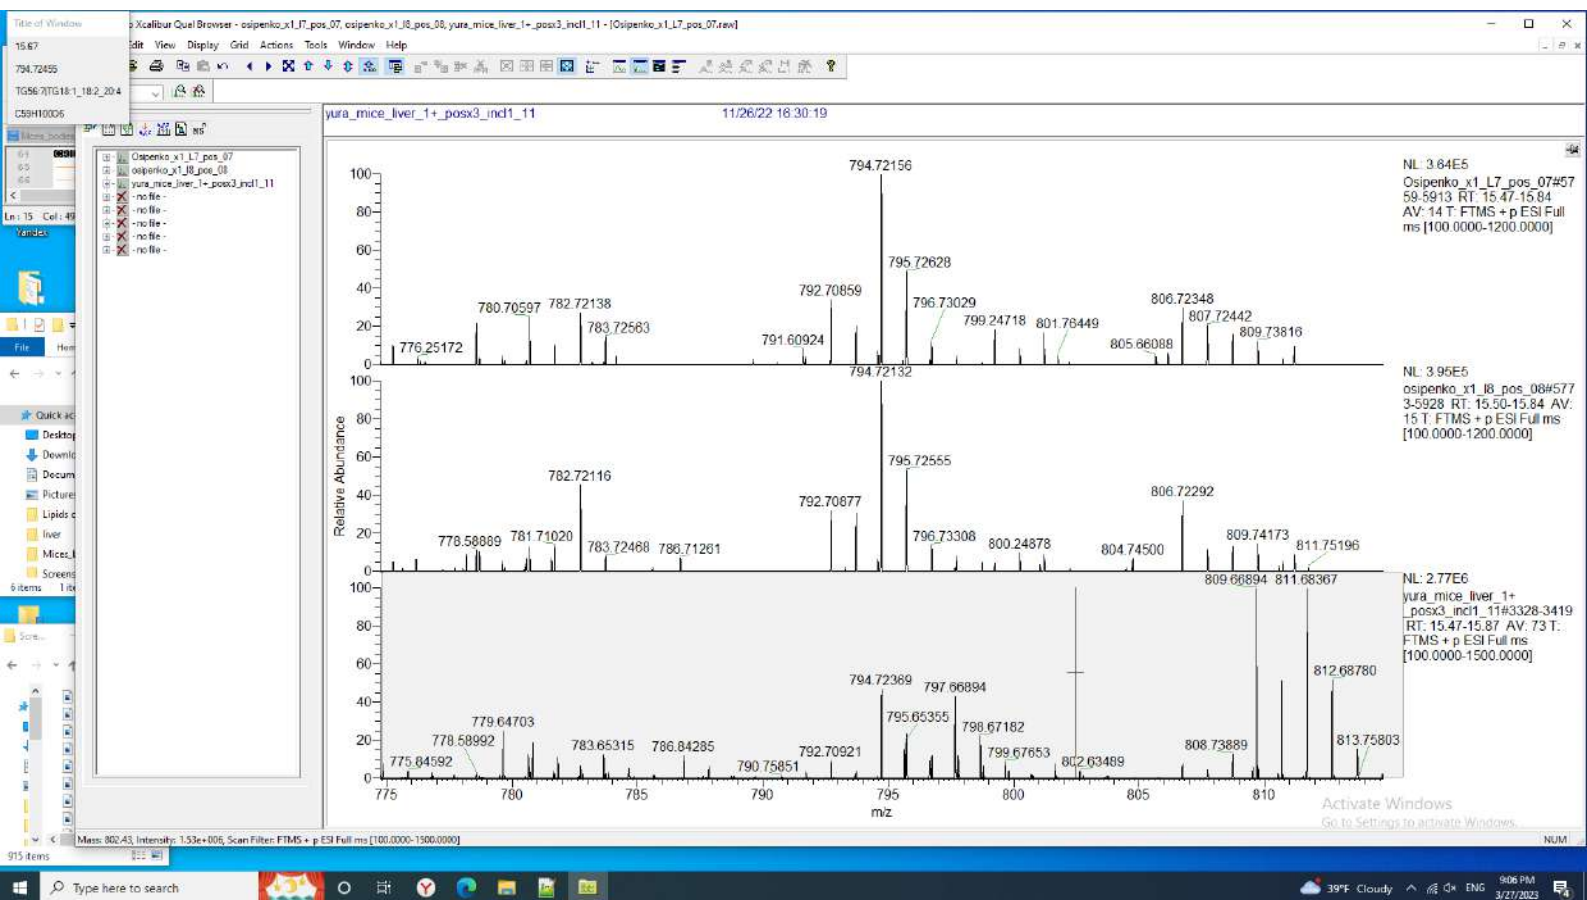



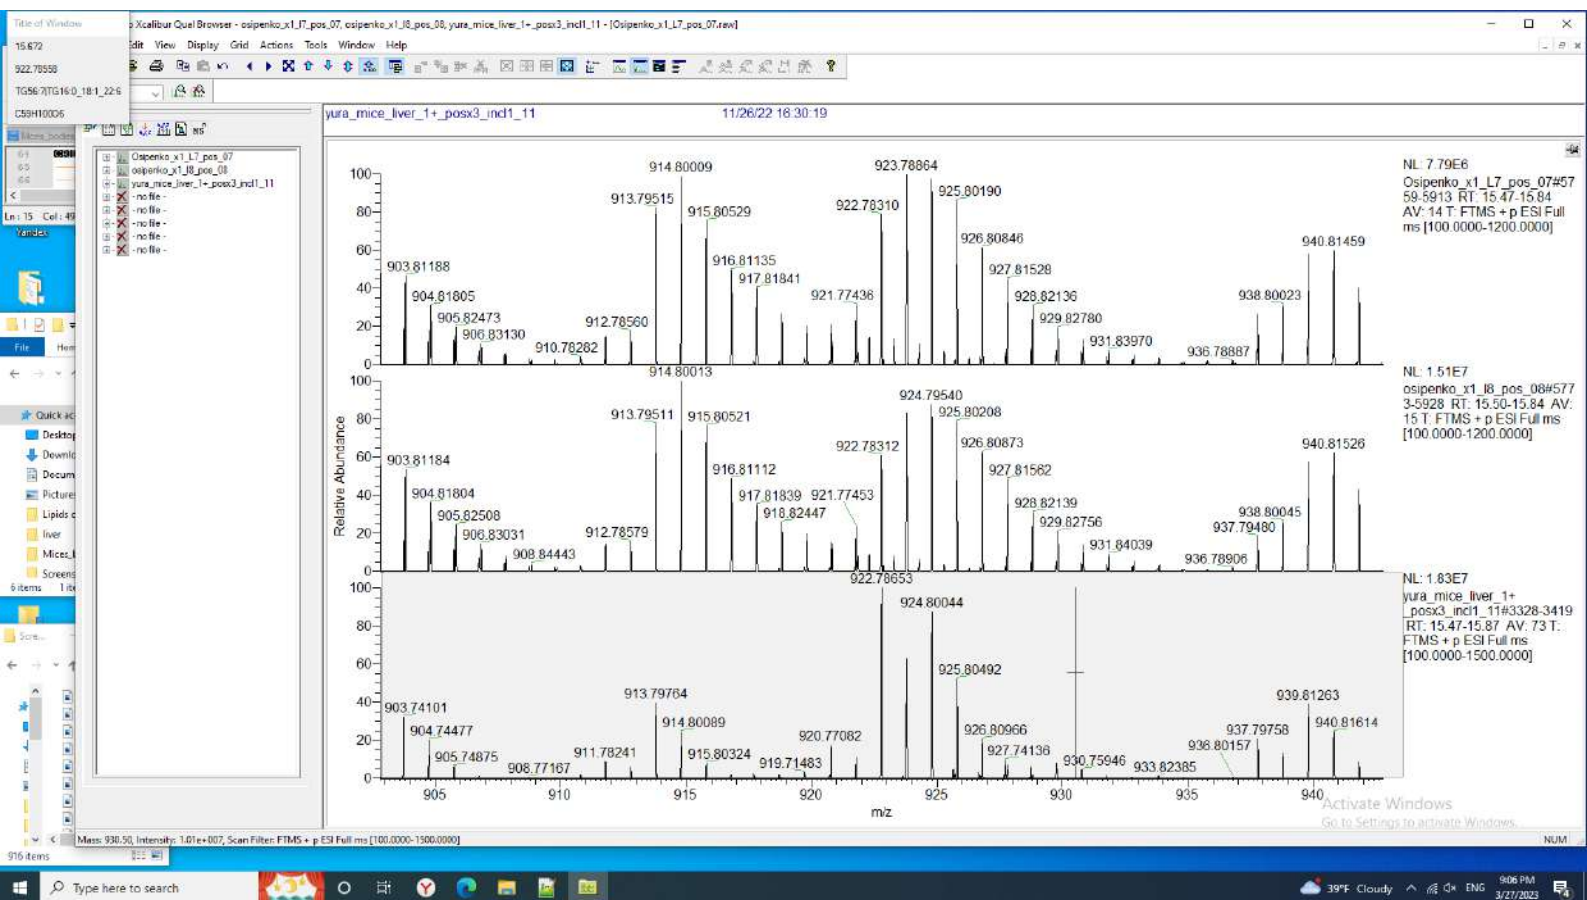

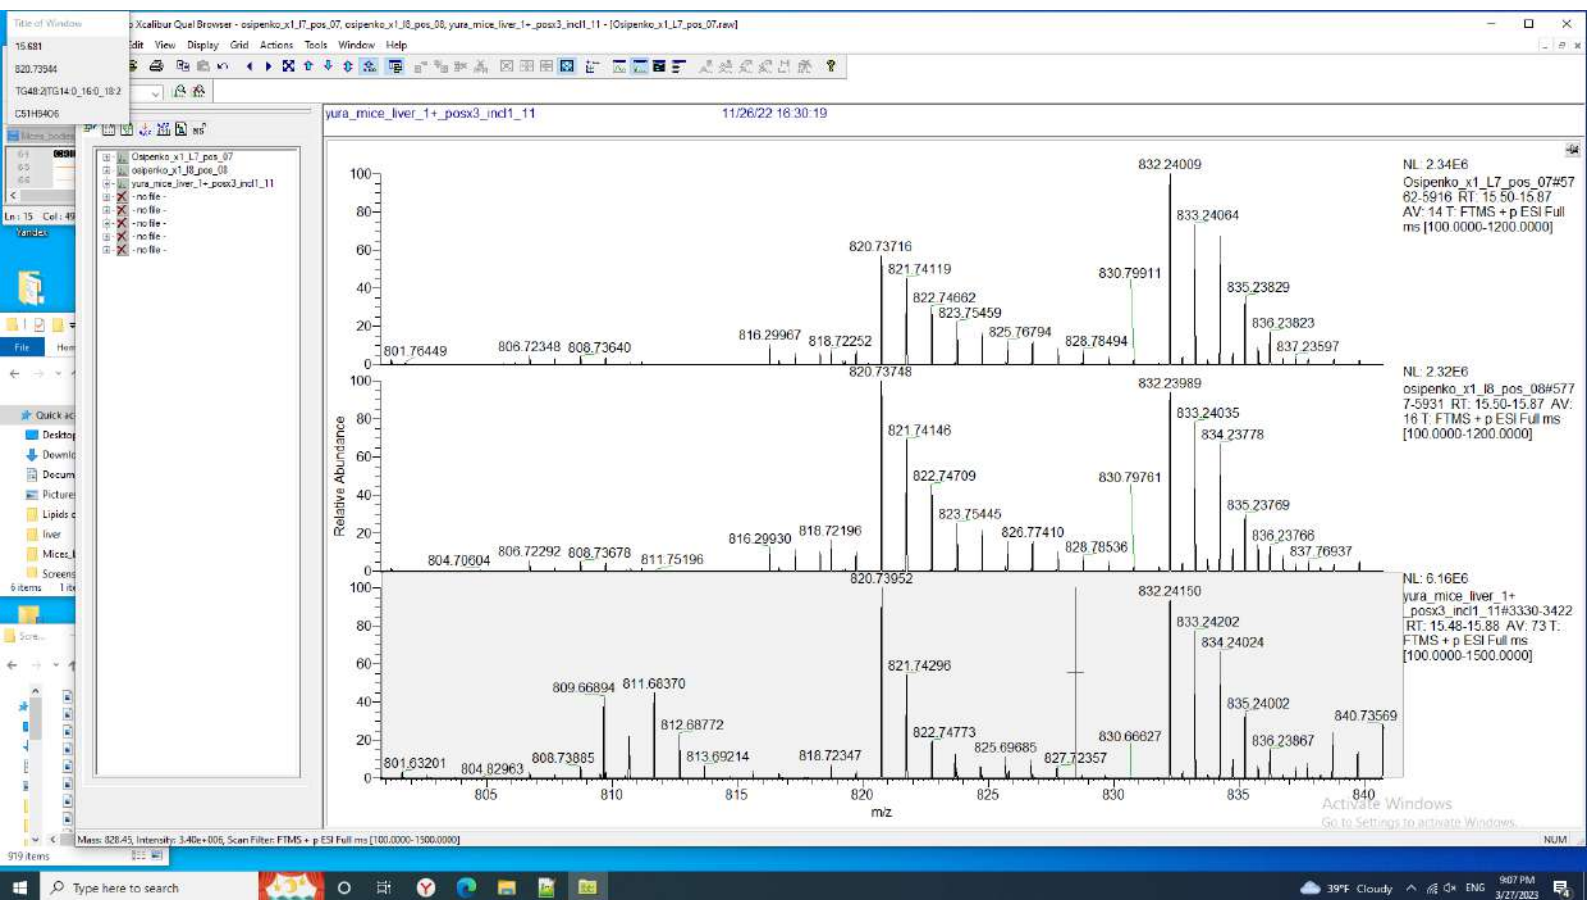

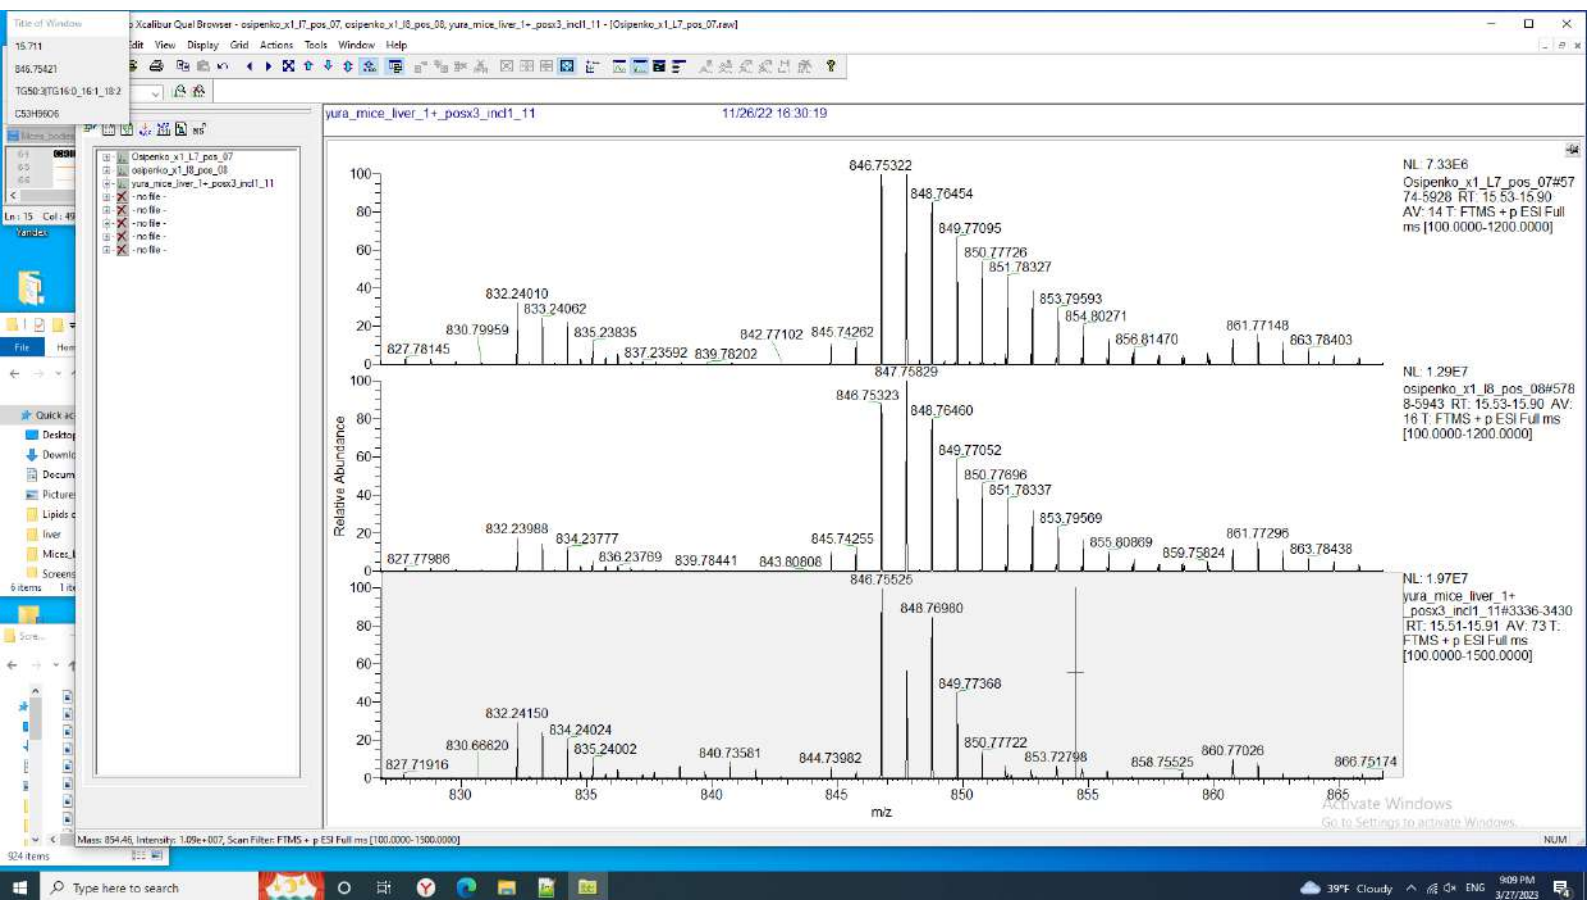

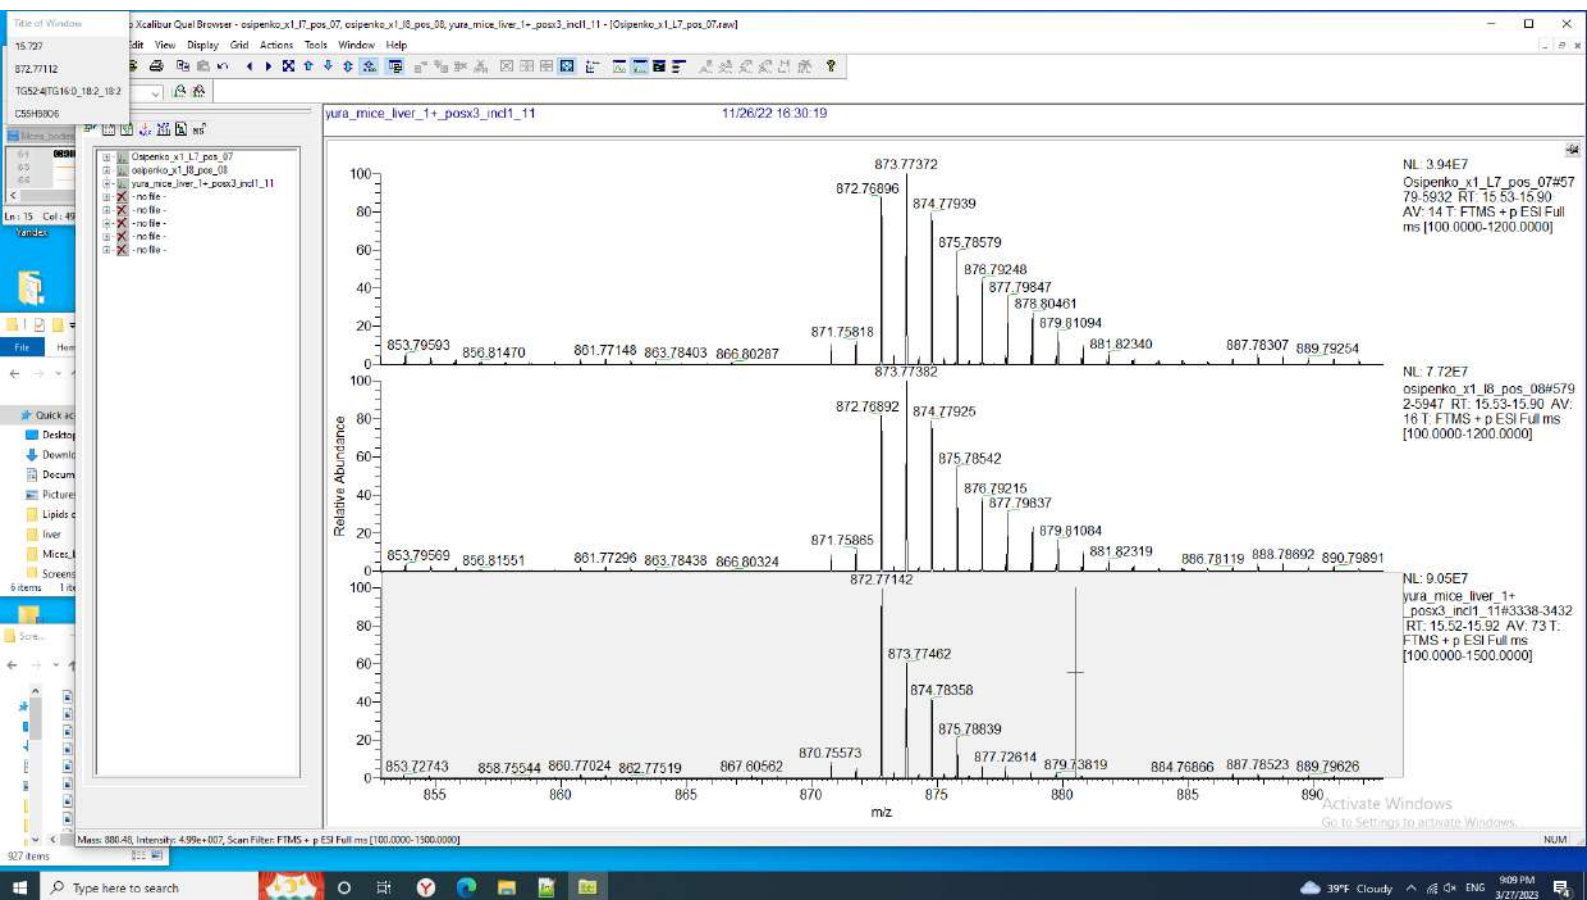

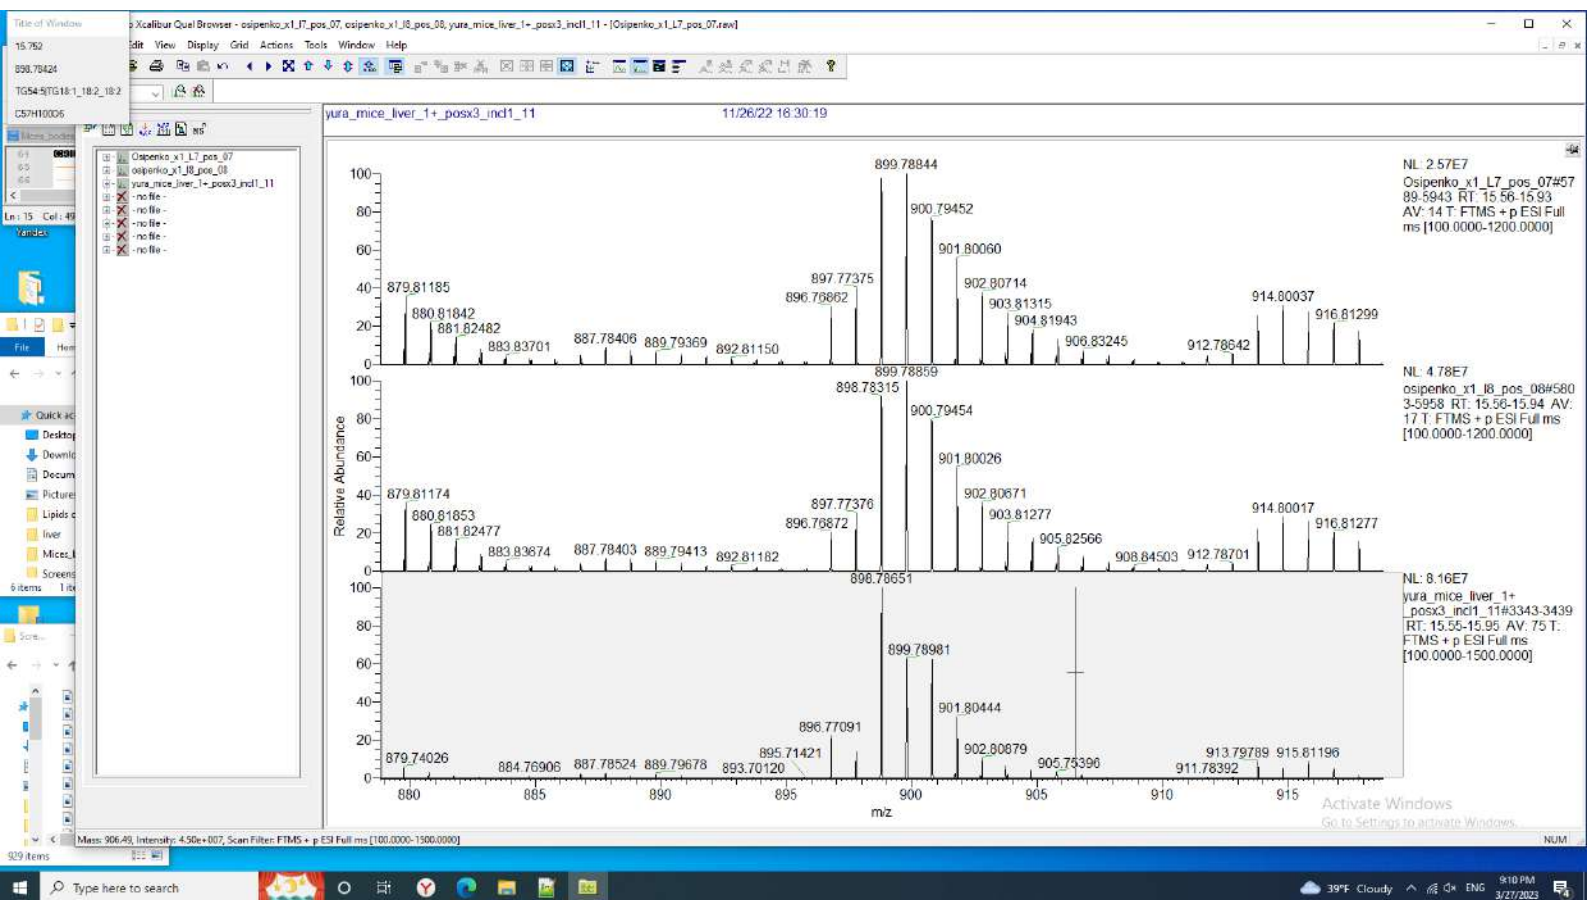



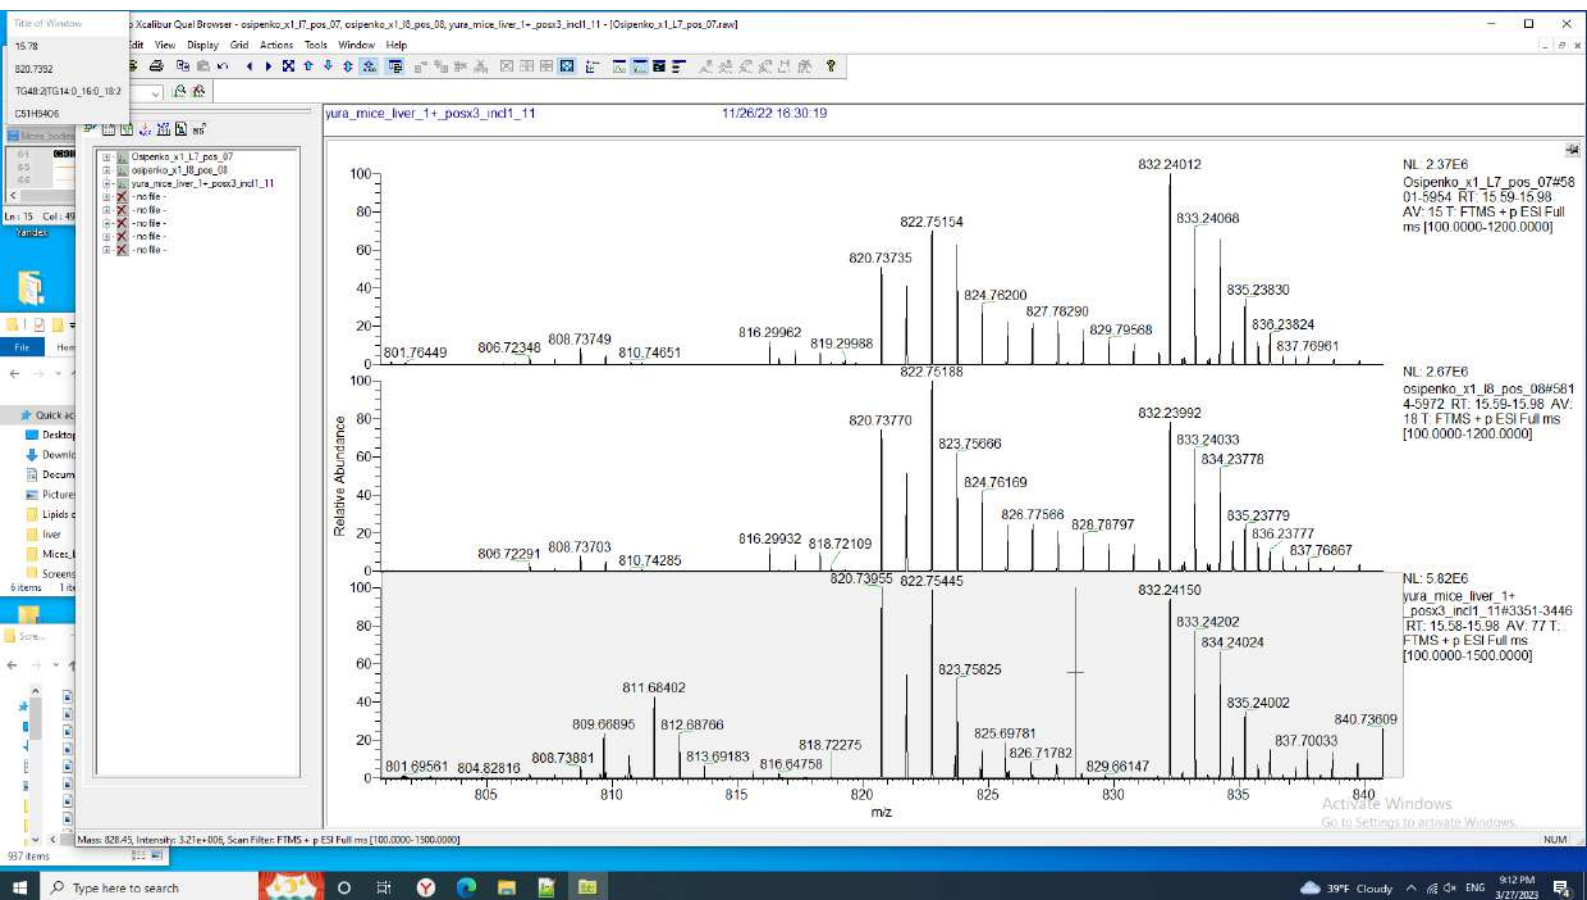



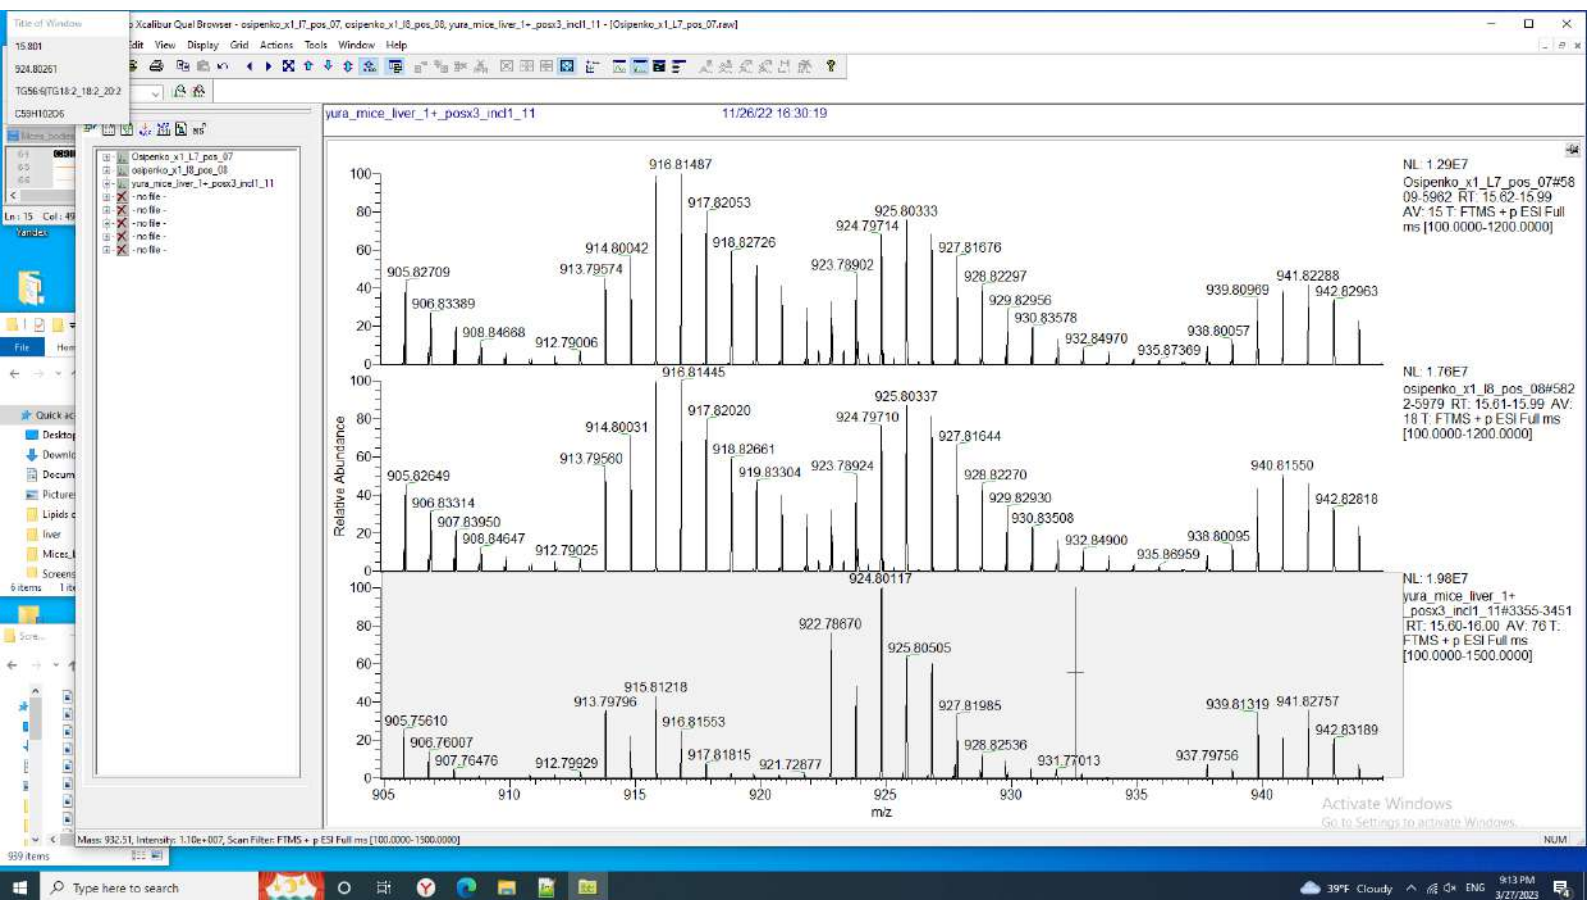

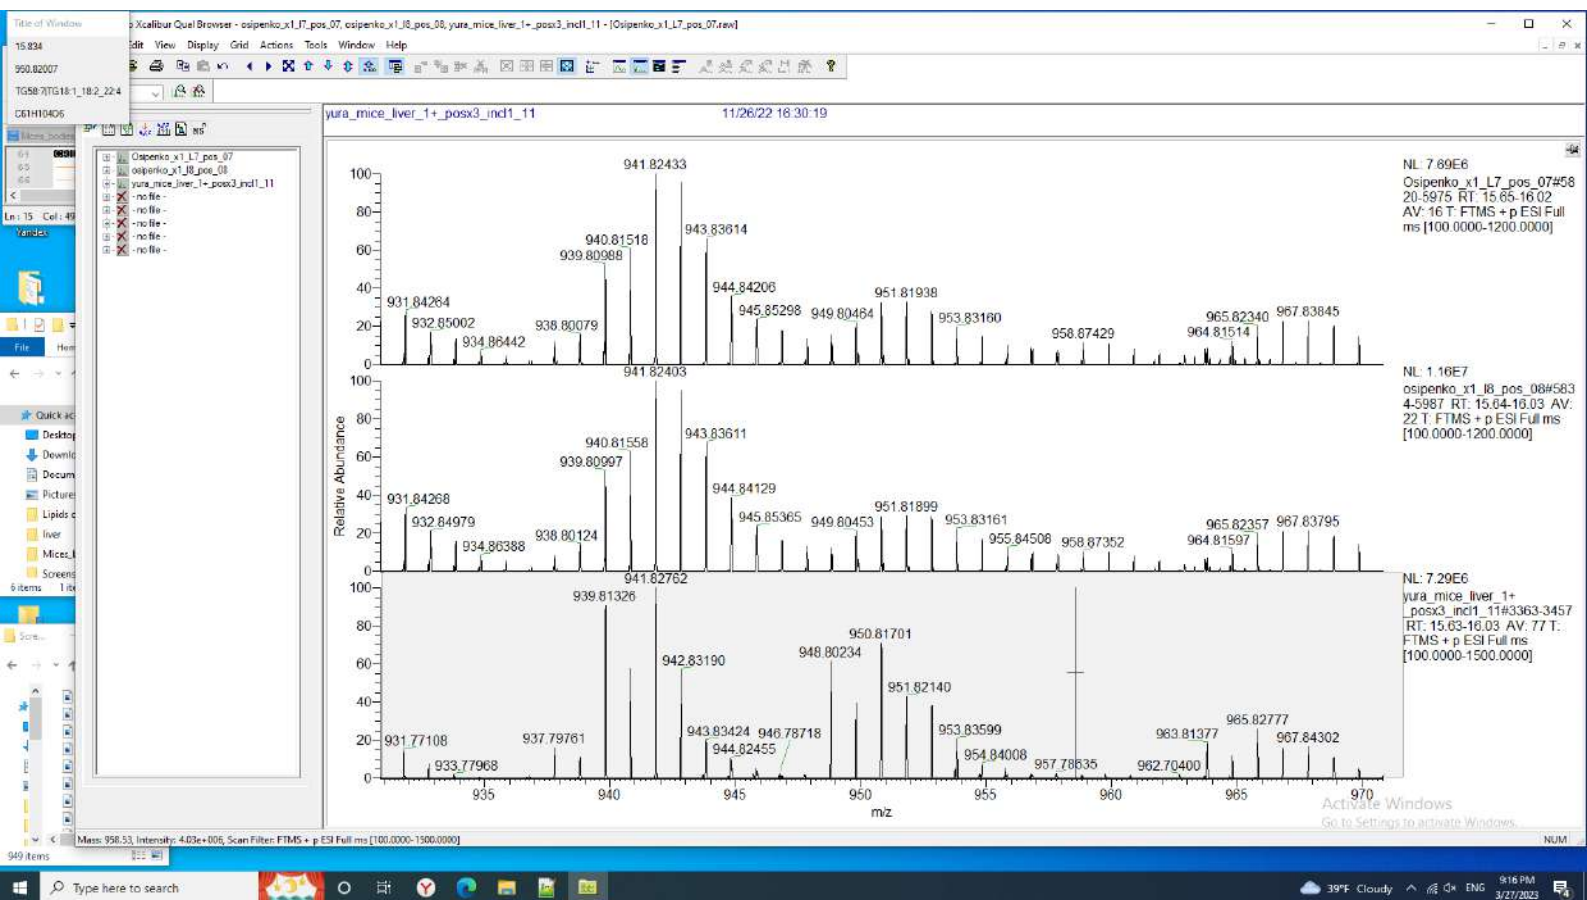

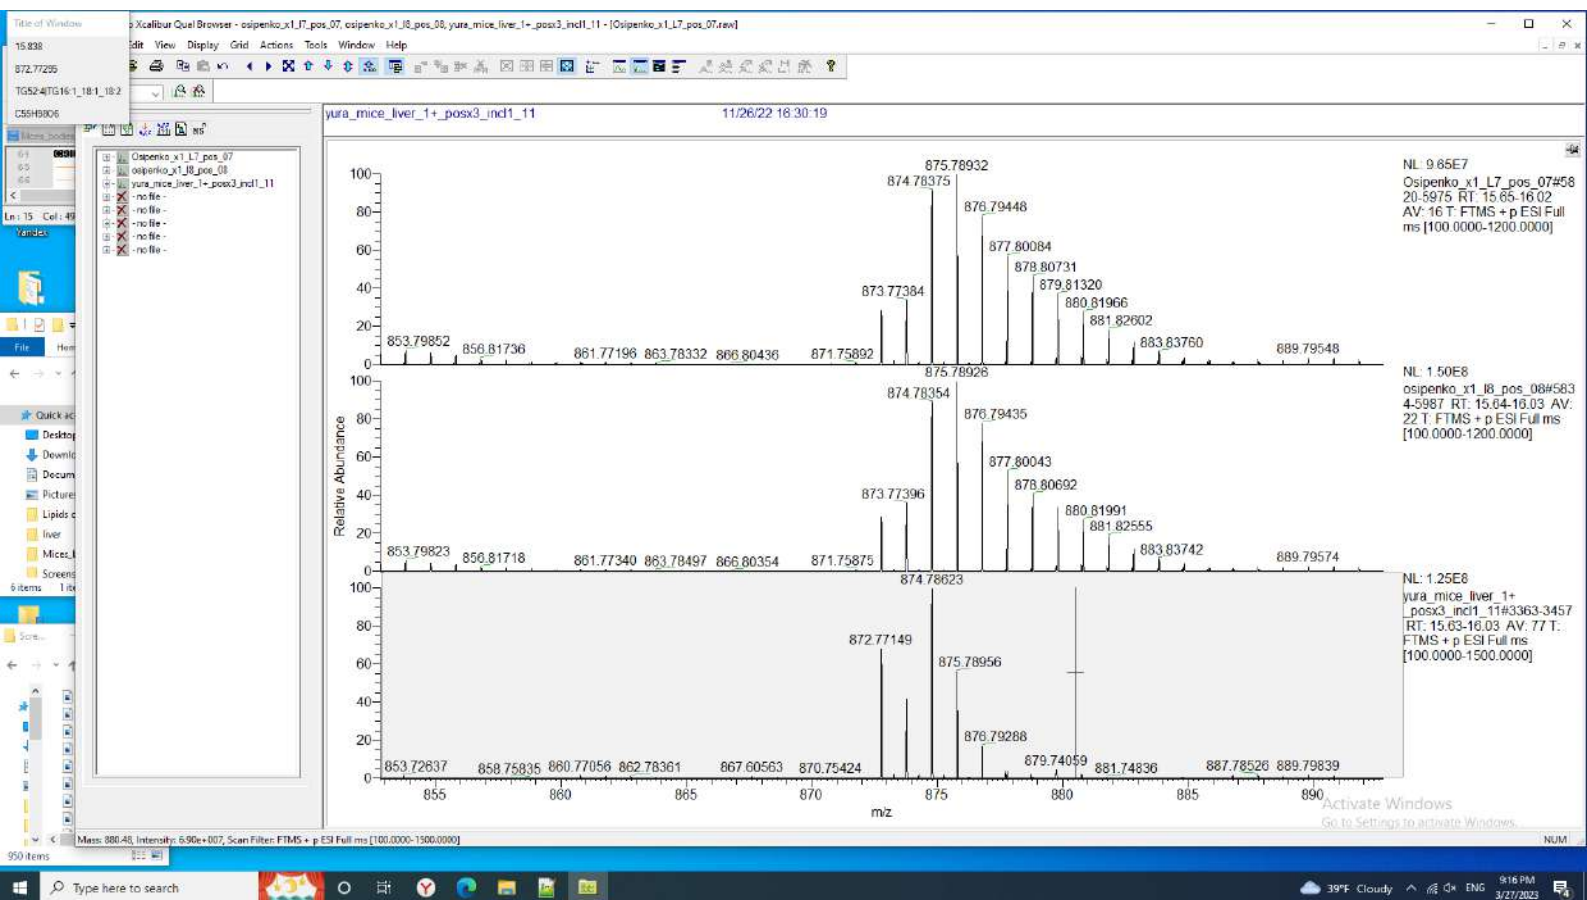

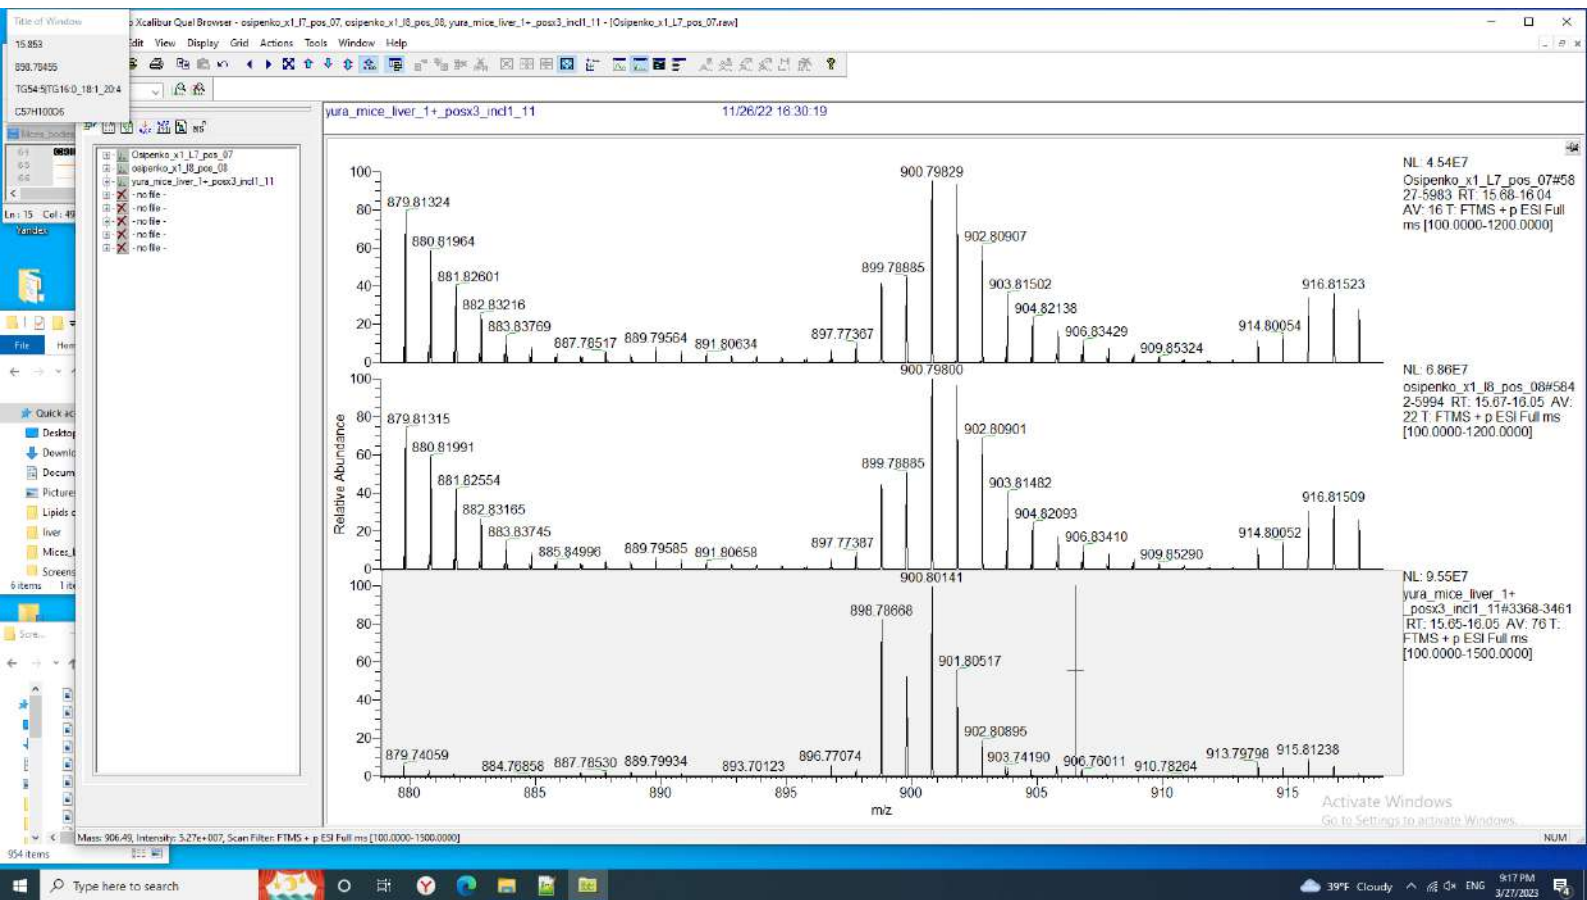

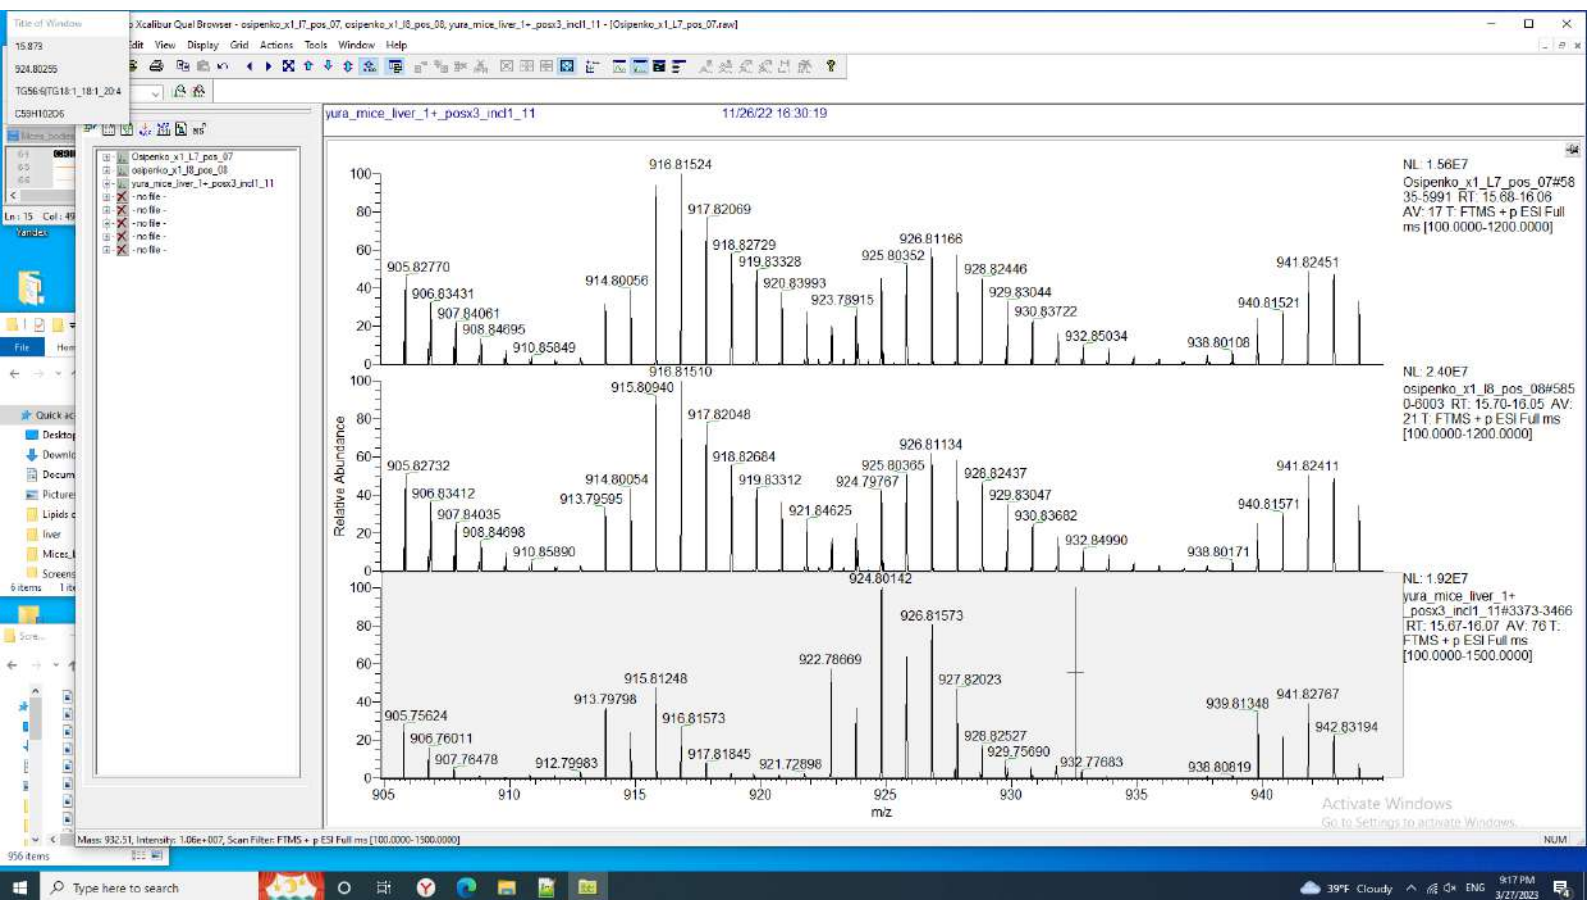



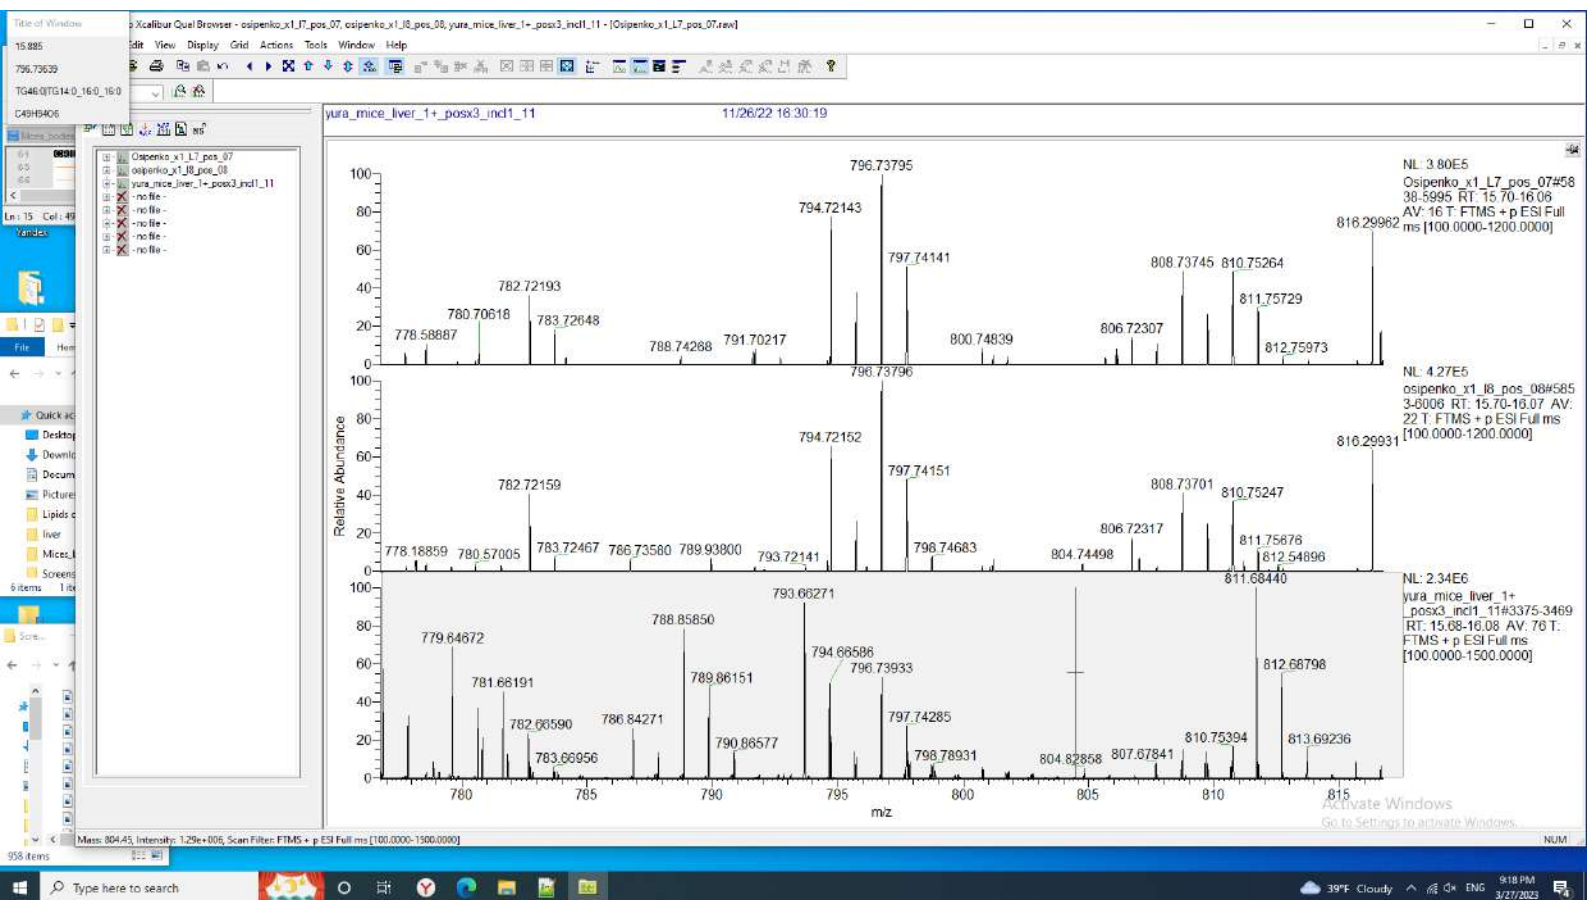



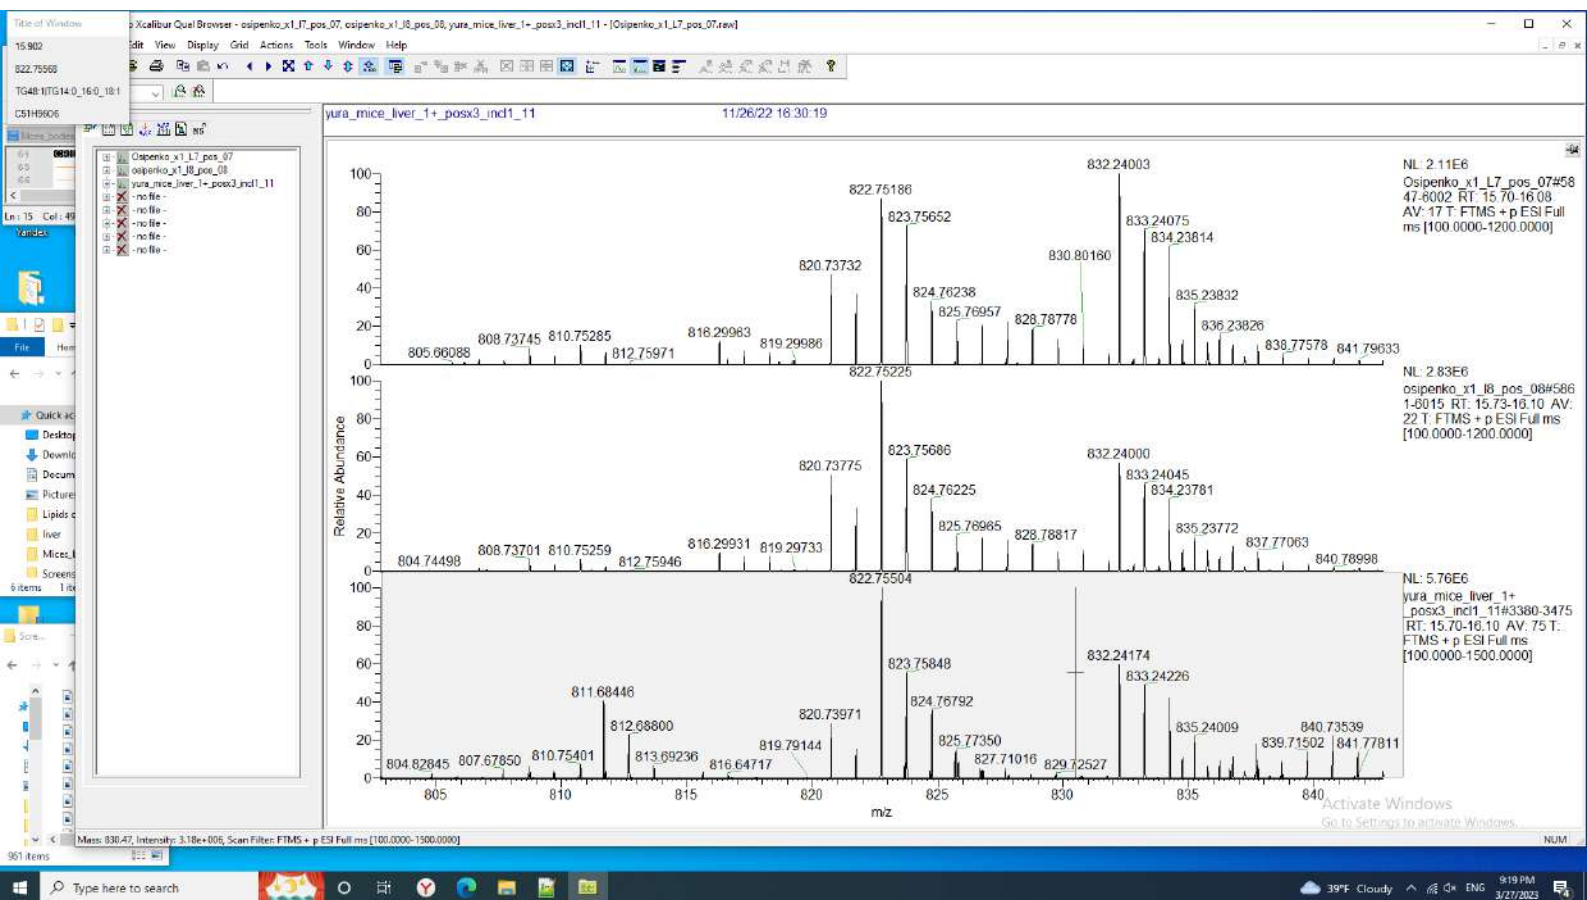

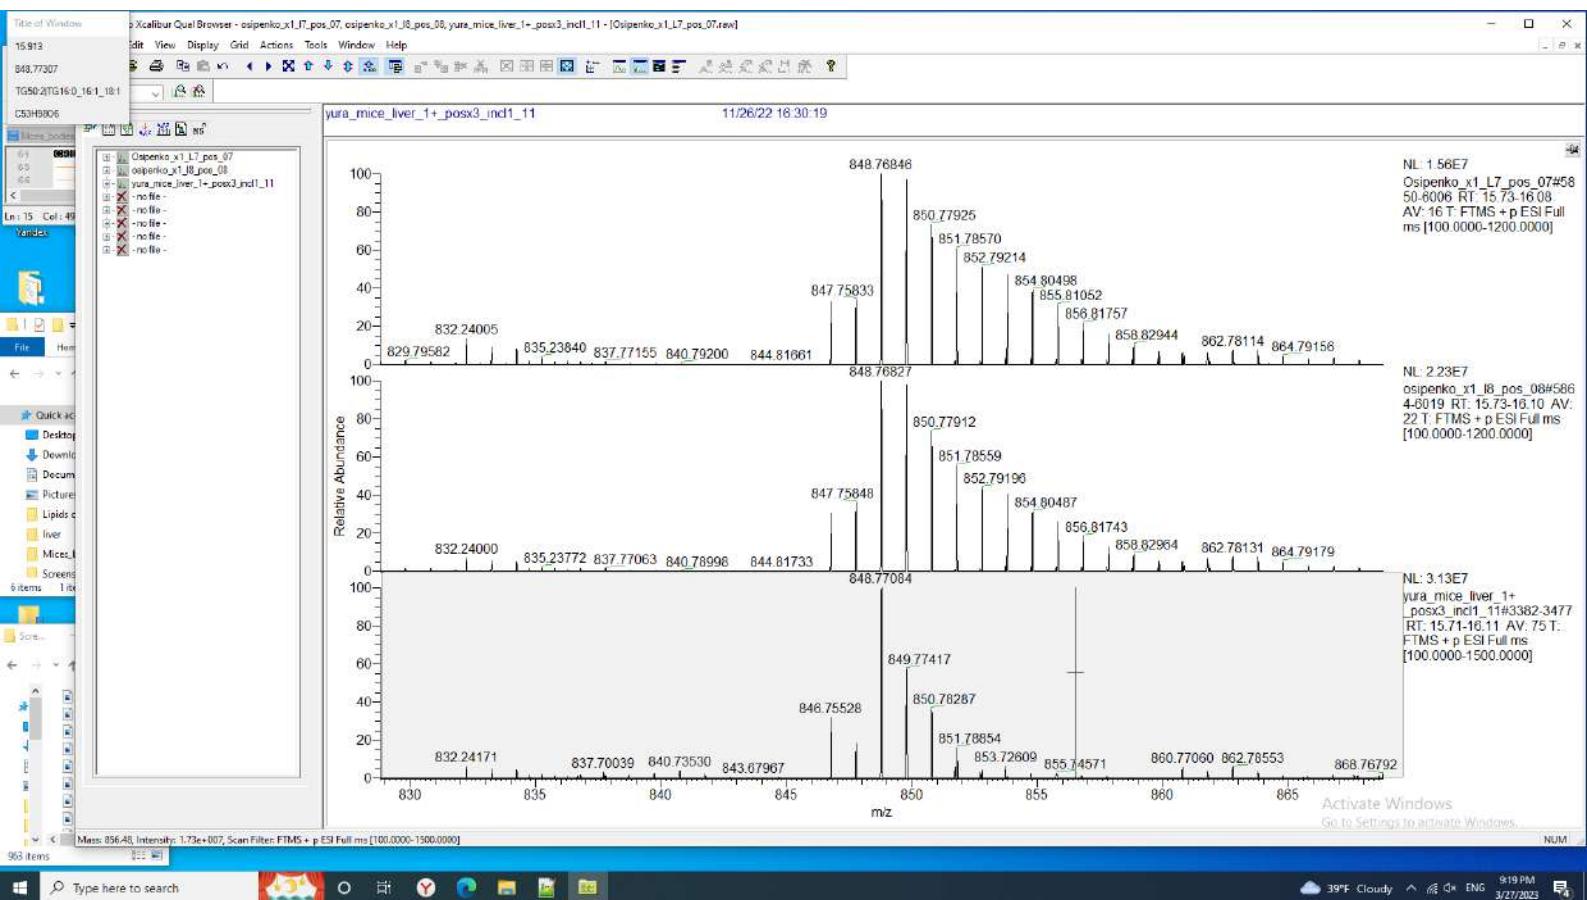

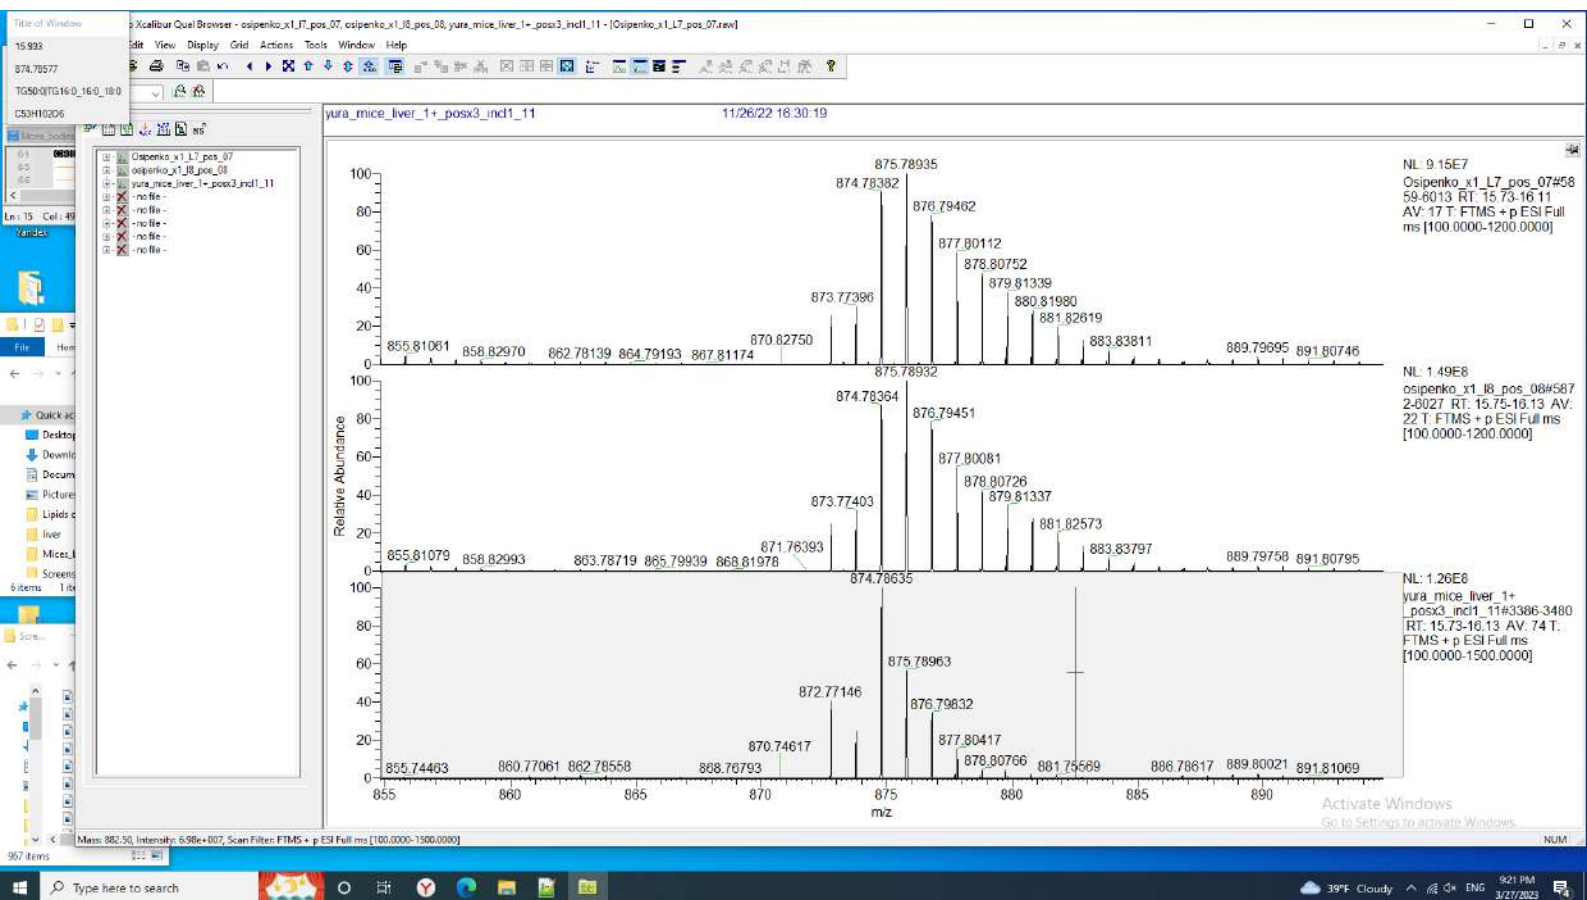

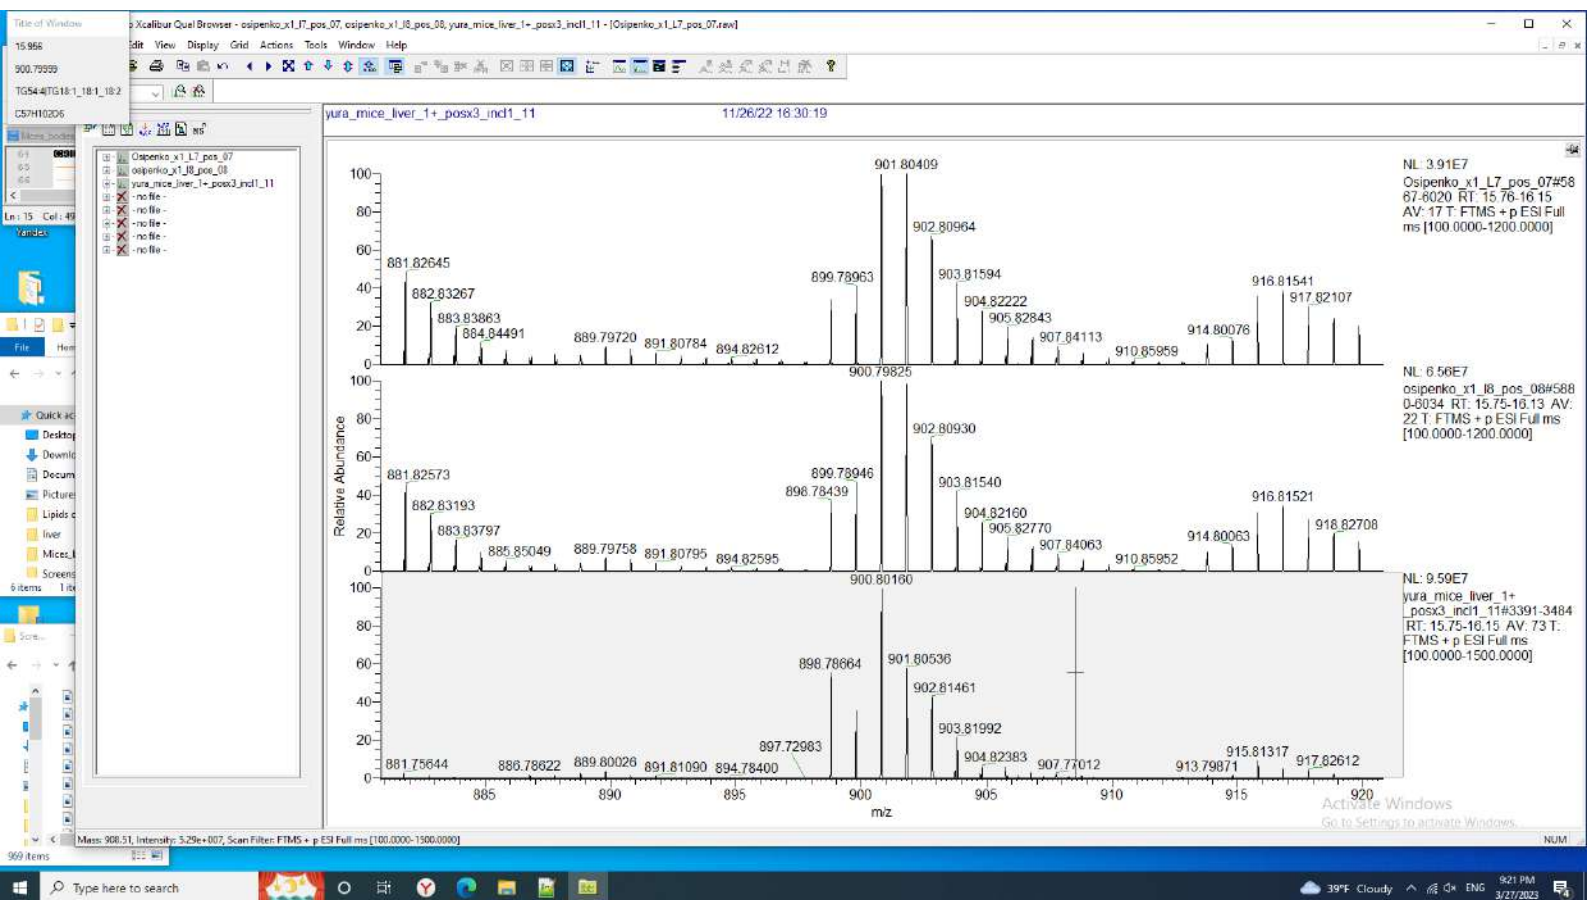

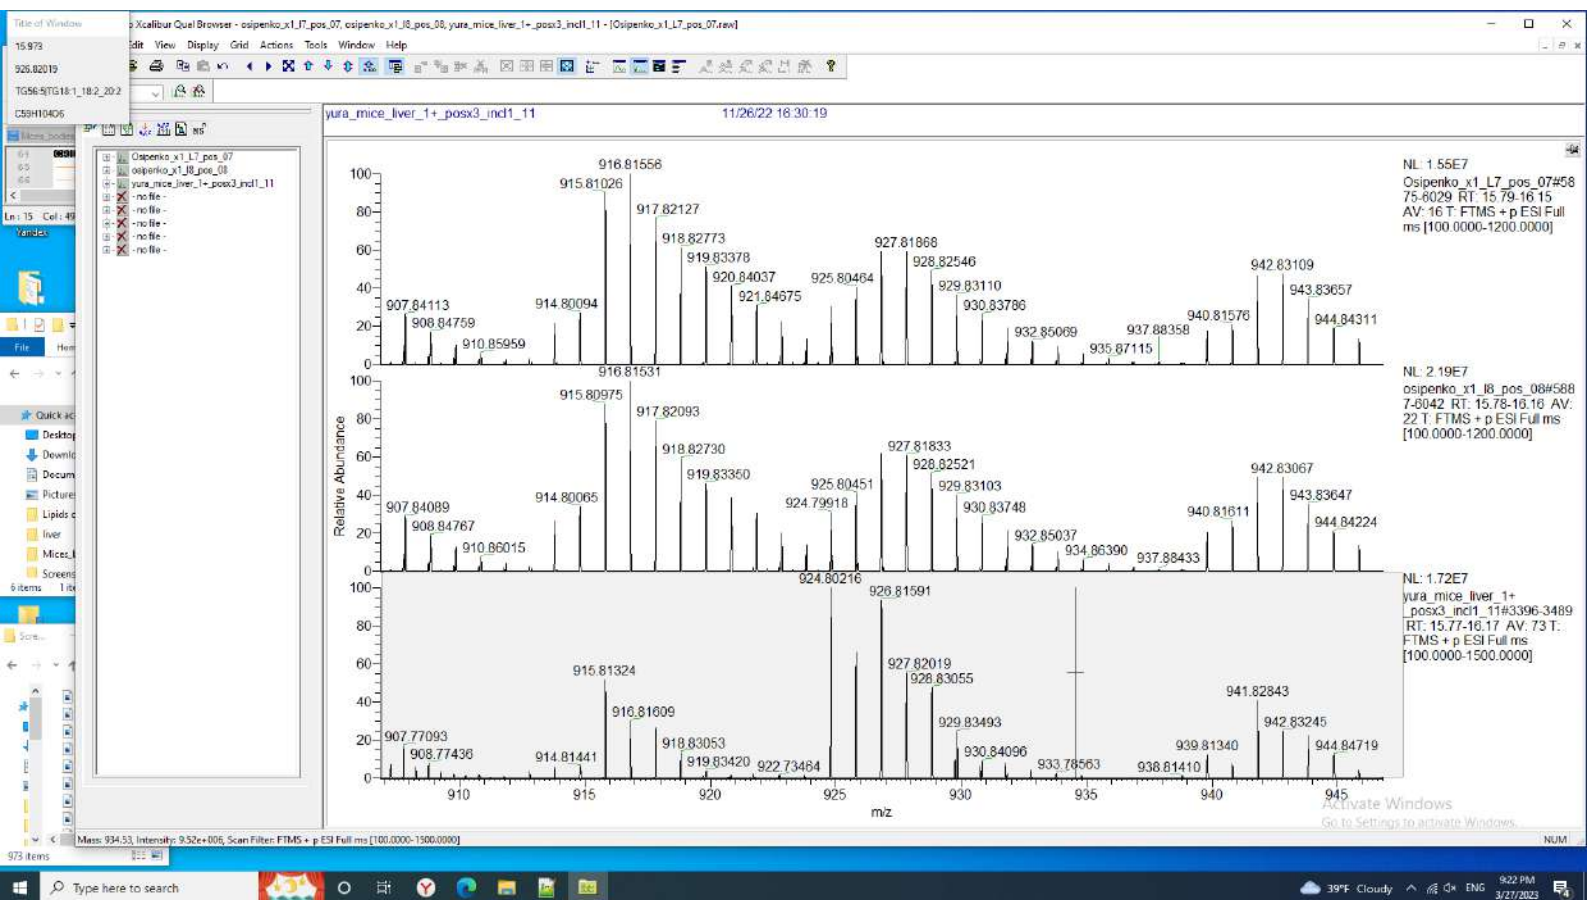



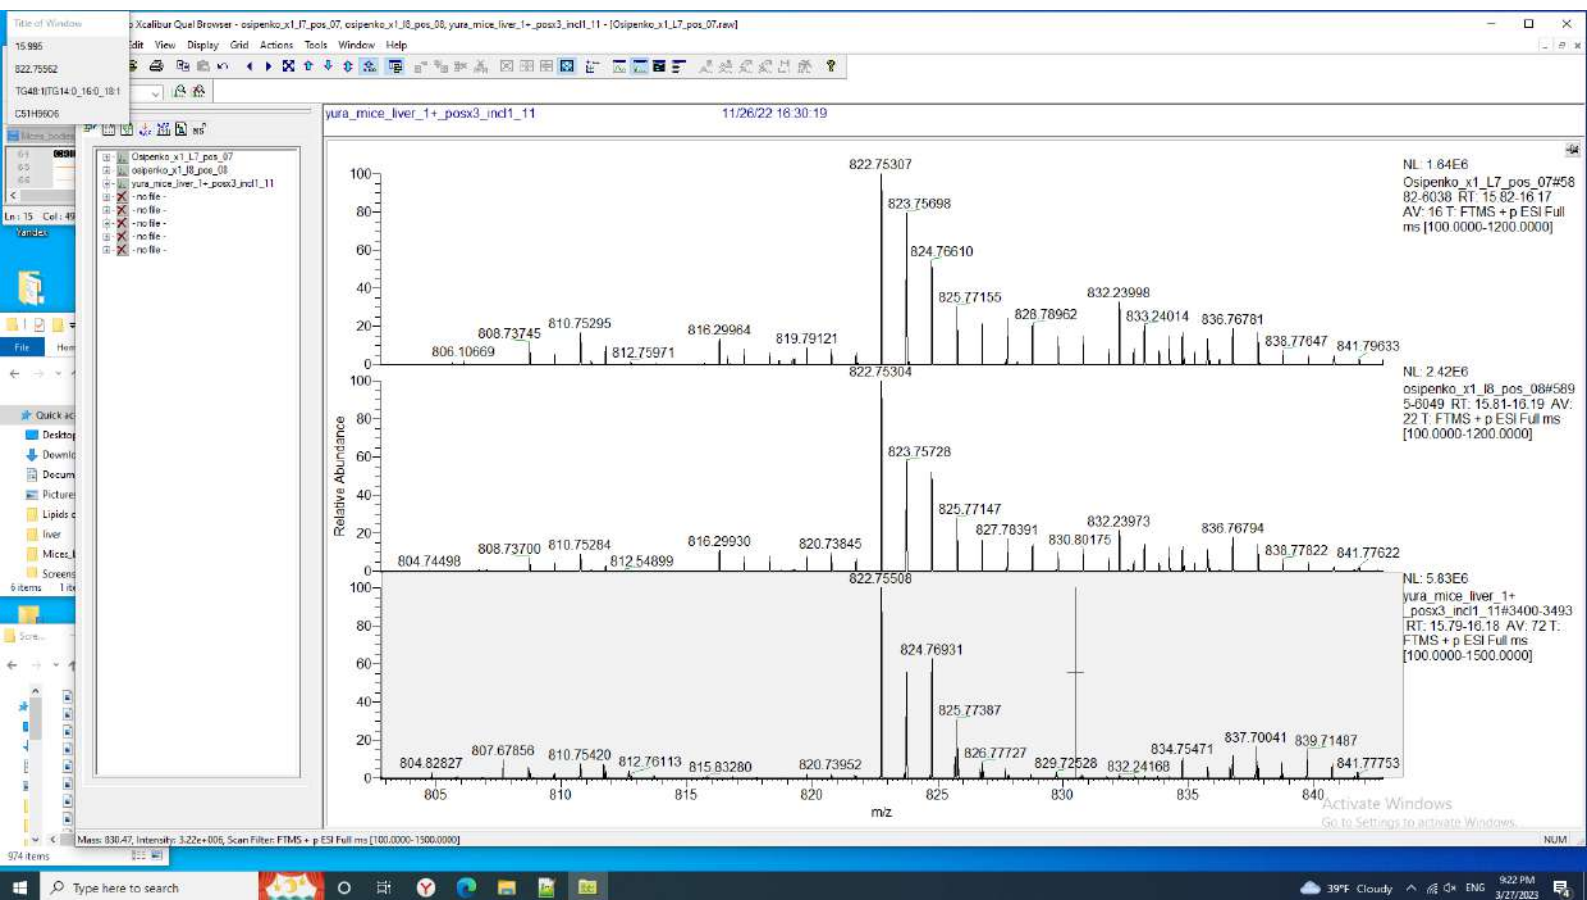



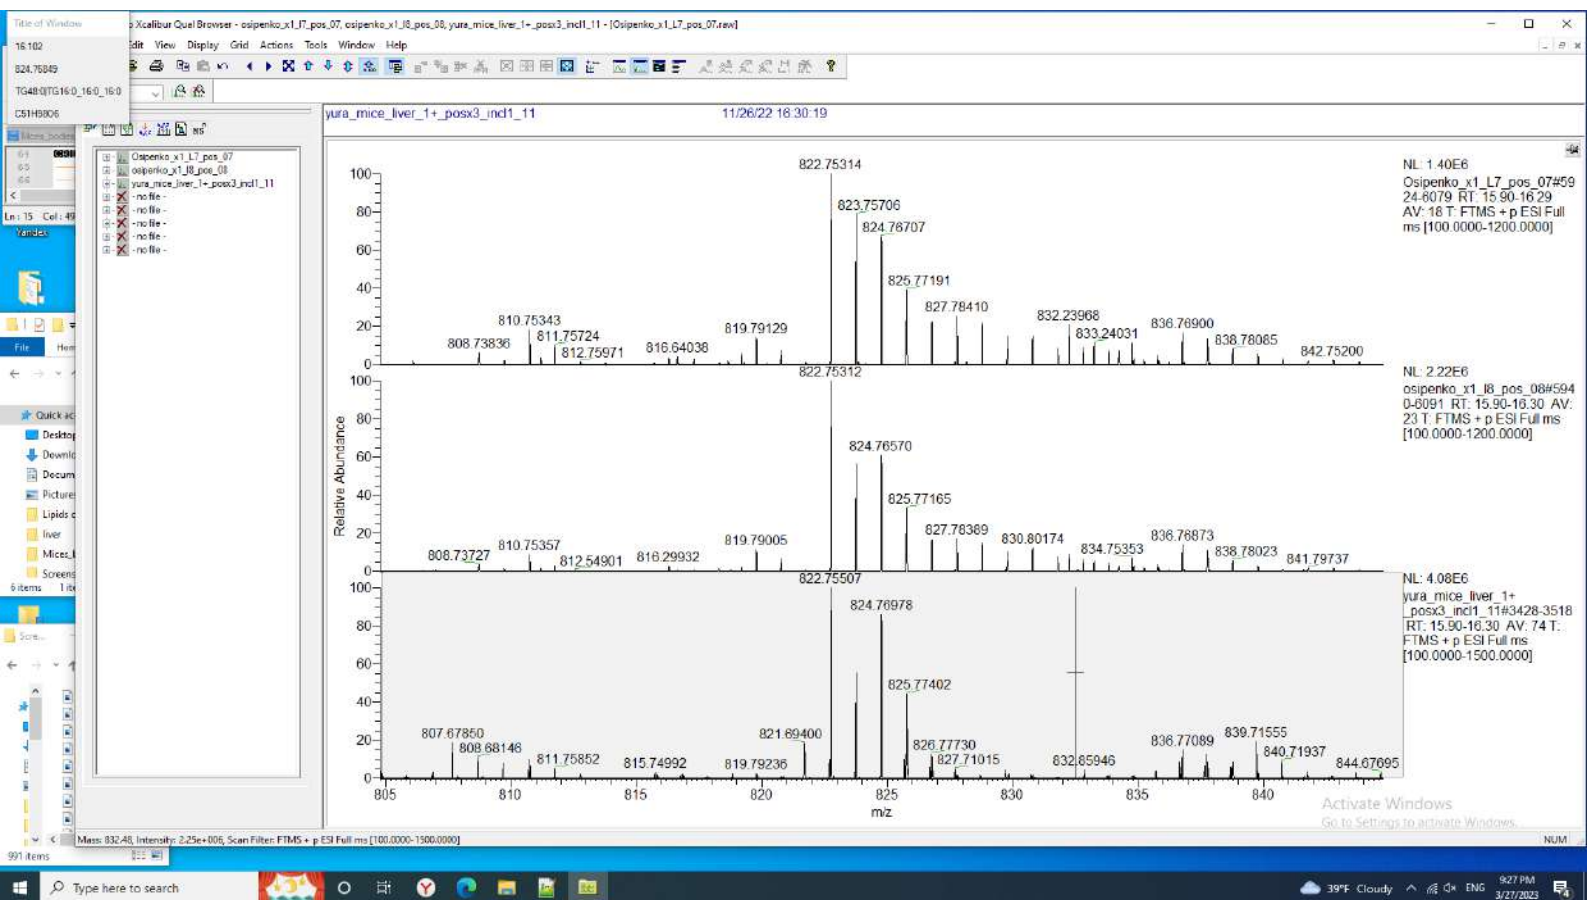

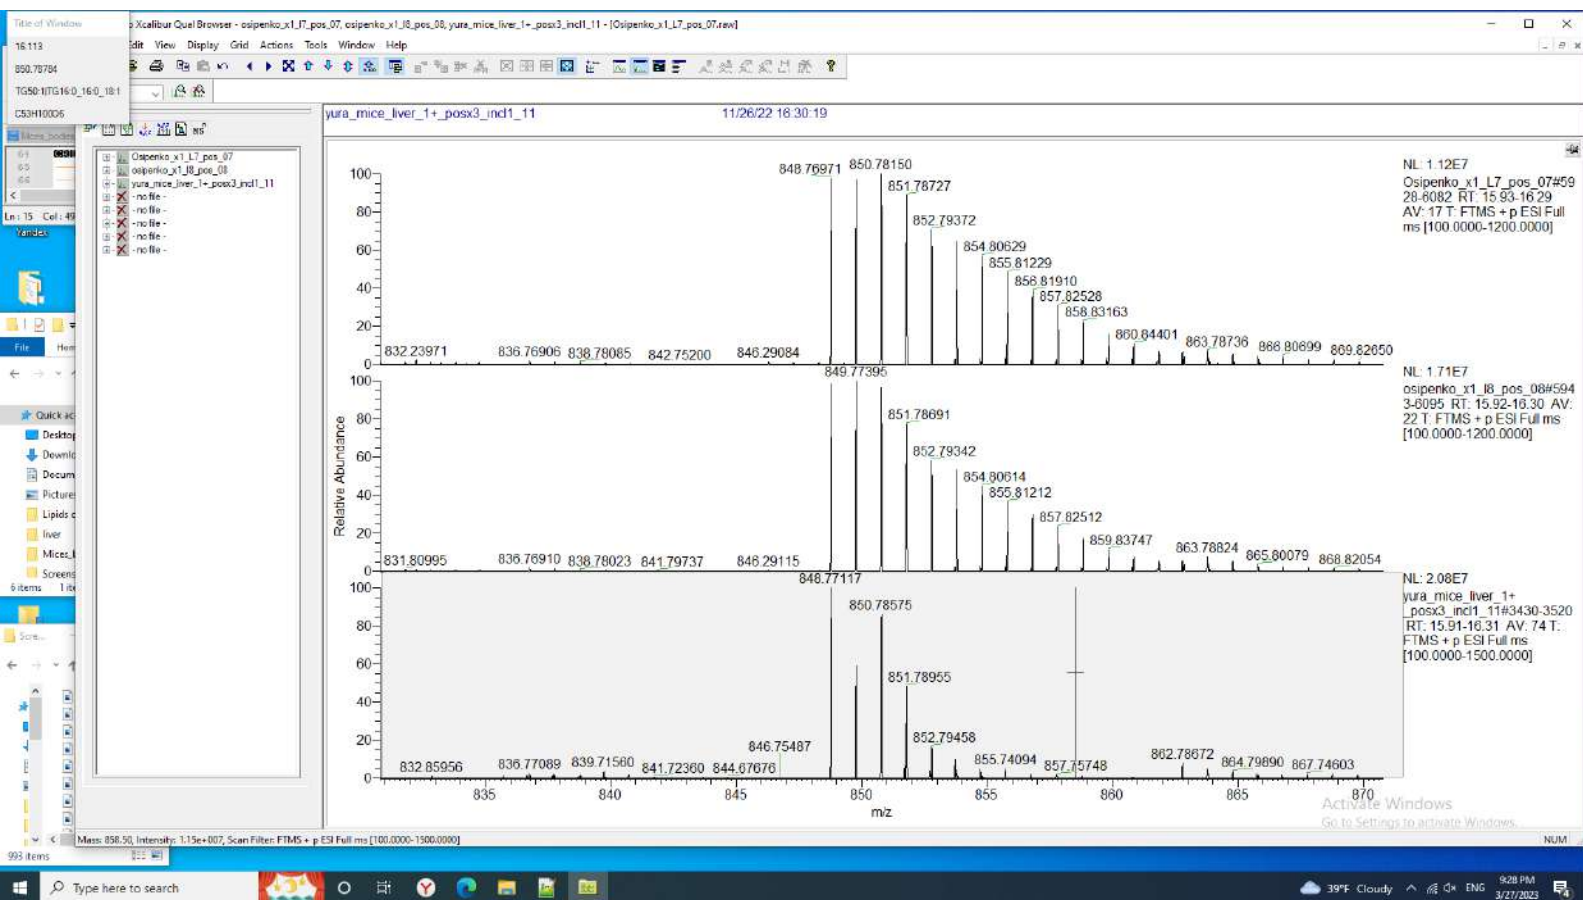

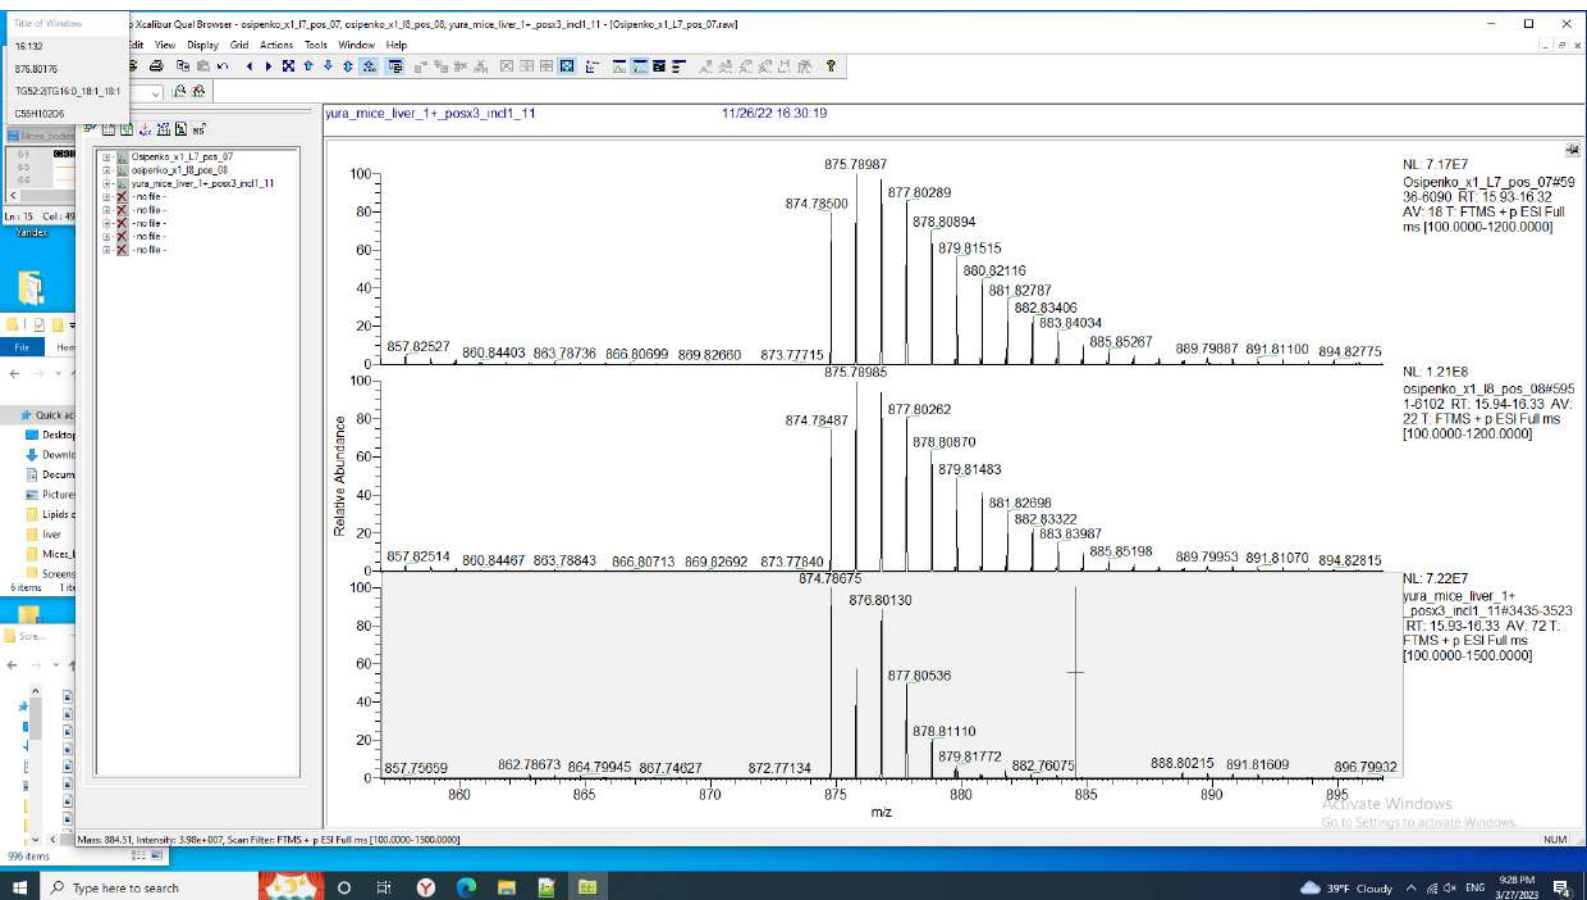

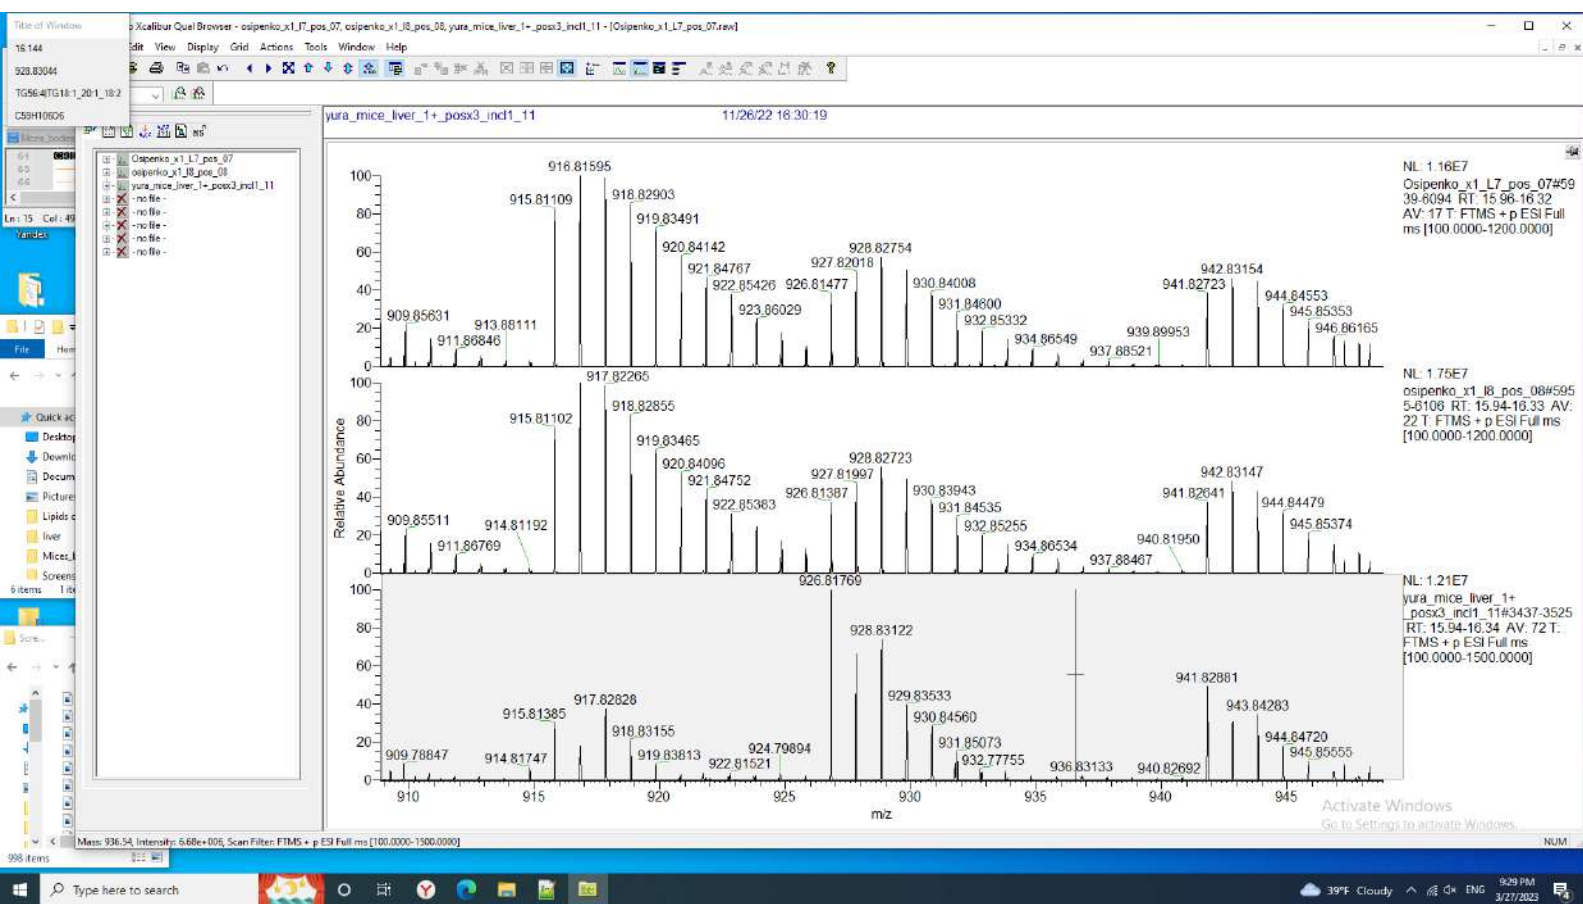

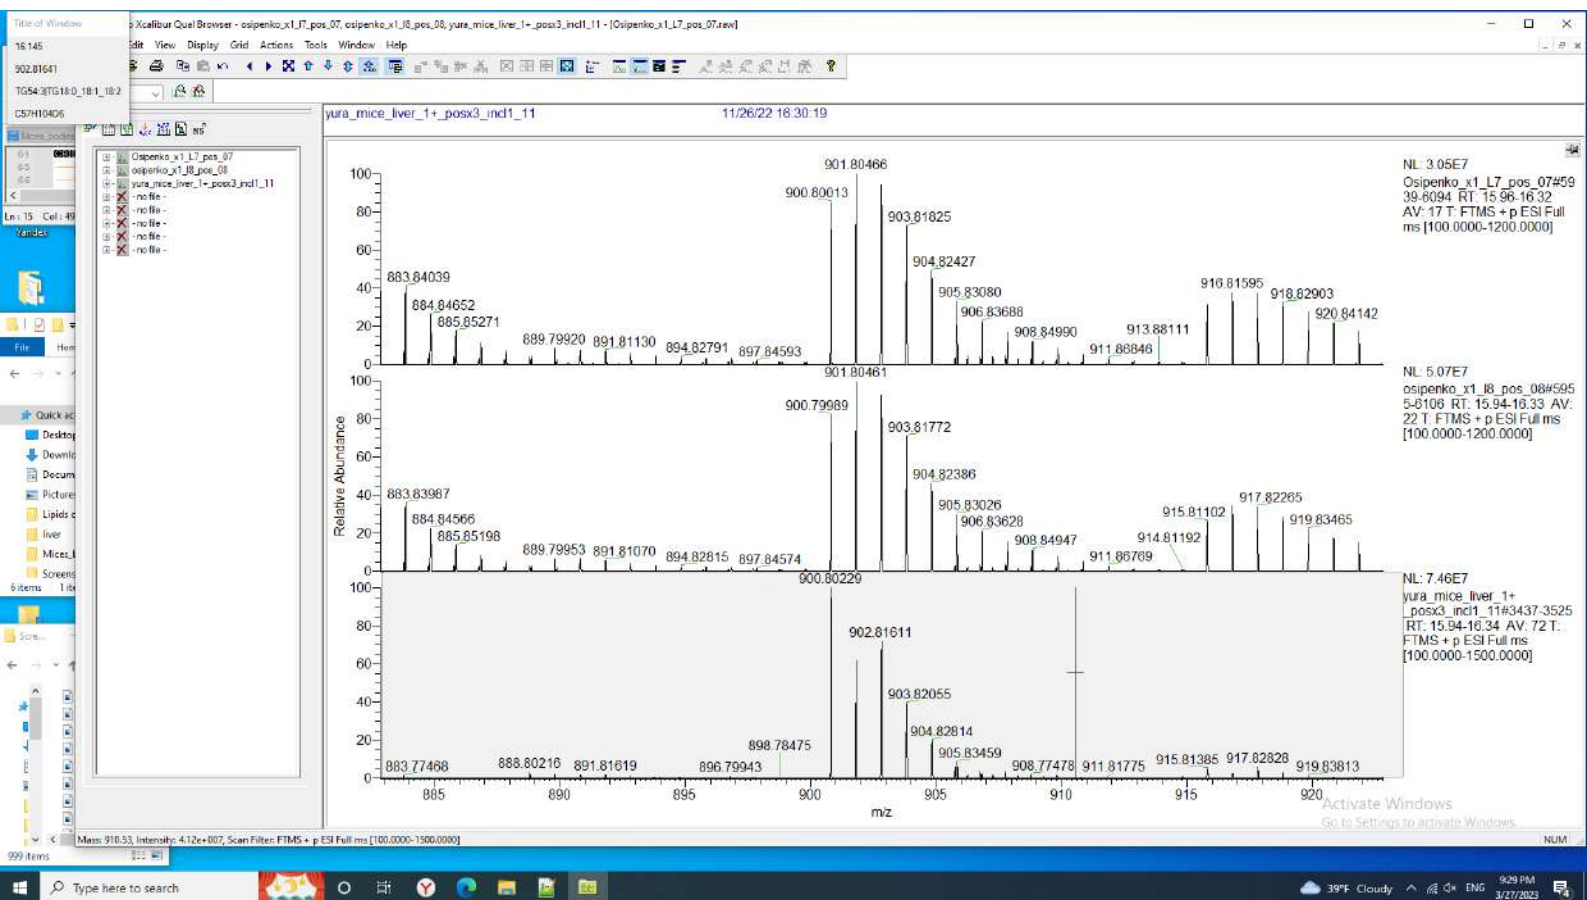



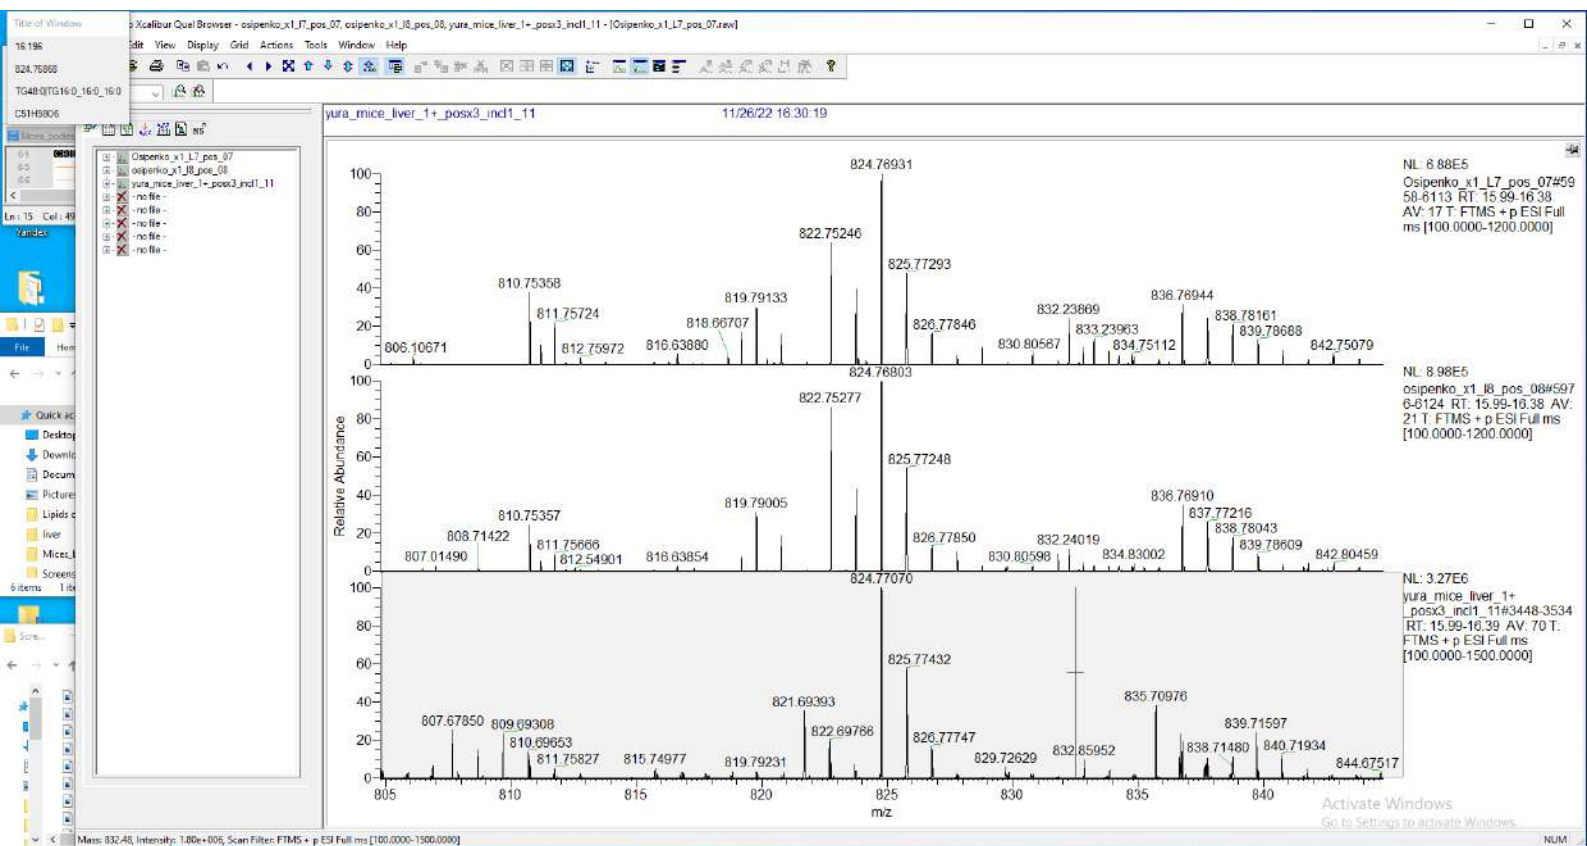



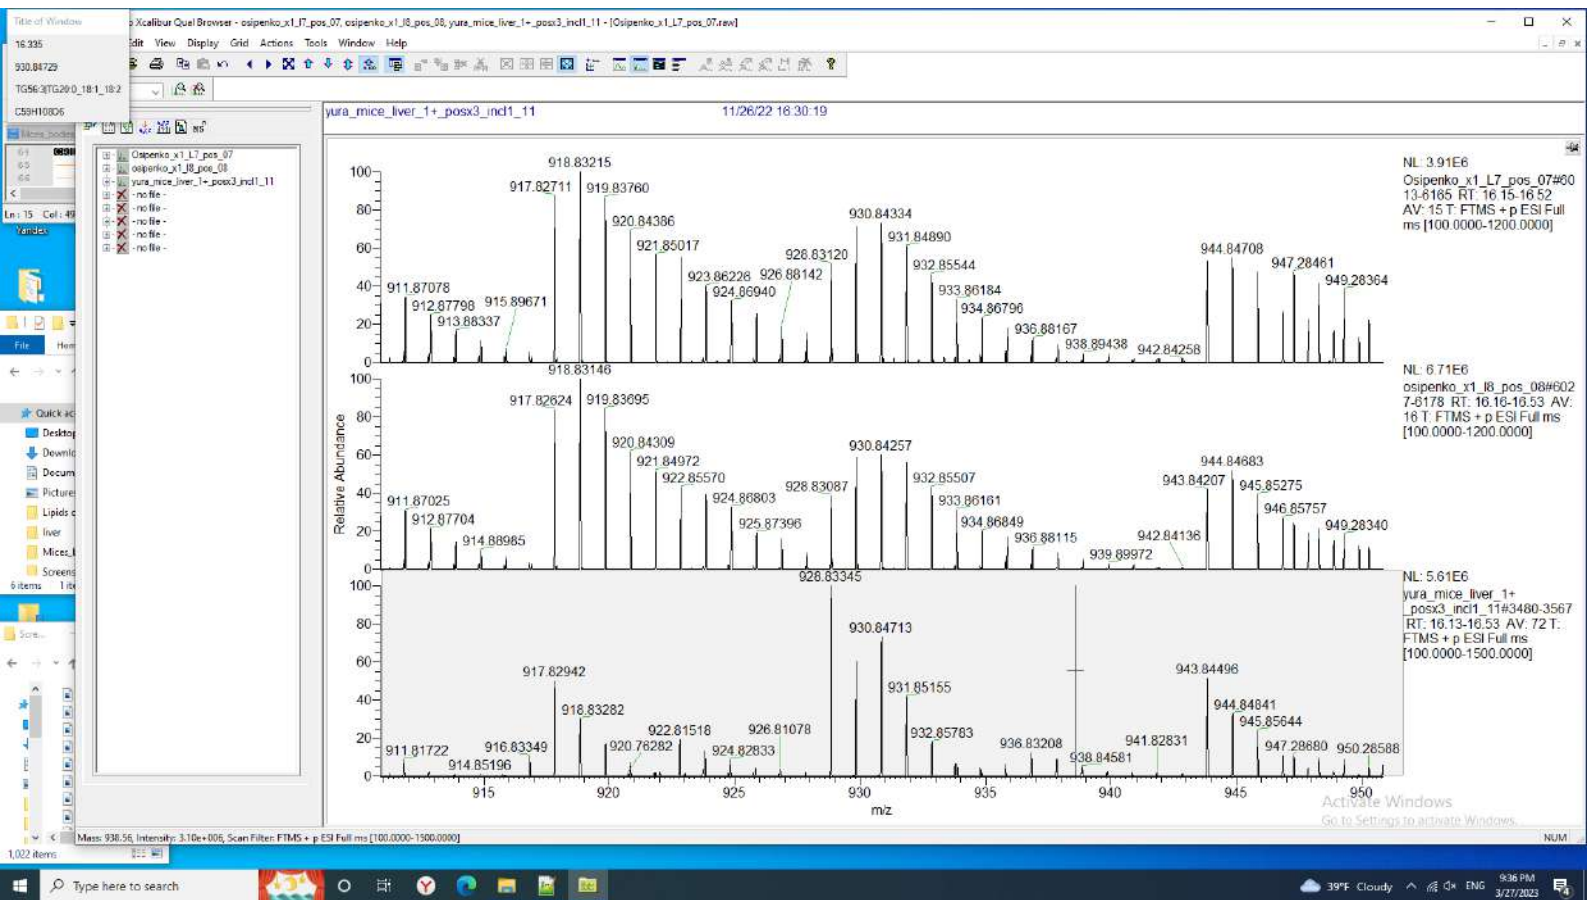

Supplement: s1 [file s1]
